# Supplementary material for: 454-Pyrosequencing: A Molecular Battiscope for Freshwater Viral Ecology
Source: Genes (Basel). 2010 Jul 21;1(2):210–26. doi: 10.3390/genes1020210 (PMC3954088; doi:10.3390/genes1020210)
Supplement: Supplementary File 2 — Supplementary Table 1 (XLSX, 5179 KB) [file genes-01-00210-s002.xlsx]

## Sheet: sequence length 37-50 
TACAGACNAATTCTGGTTCAGTTTGCNCAGGAAGAAT
CTCTTCCACCACATCACCAGCAGCATCAGCAGCAGCT
TAAATTTATGGGGCCATAGCCCCCACAAGCGGGGGAGA
ACCCAACCAACAATAGACCTTAACTTTACTATACAACT
CAGTGCTGATAATGCCAGGCCAGTAATGACAGTCTGAAG
GTTGCACTCGATCAGTCTGCTGCATTCGACTGCACTGACC
CATATAATAATGGTCGAGCATCCGTAGCATTCTCAGCAGC
CAGCCCATTGCATGATACGCTGTGCTGAGCGGTCATACATC
CGGTATCGAAGAGGAAGCGATCTTGCTGCAGCGCACGAGCT
CATCTCTTGTTCTGTTTCAATATGATCAAGAAGATGACCAG
AATATCCAATAGATTGCATCGCTGAATAATTGCGTGTTGCA
CCAGGATCACTGCGGCCGGGCGGAGCTGCAGCTCGACGAGC
GCTATCACTACCAGAAGATGCTATTGTCTGGACAGTTGCAC
CATCGGTCACTGTGGCACAGCAGACCTATCAACTGGAACAG
CCTGCGGCGGCCGCAGATAACTGCGATTATGTGATGGTCAT
TTCATCGCATAGTGGACACGTGCCTGCACGGCACTCATCATC
CAACTCCACATGCGCTCCAGTATGCGCCGCACCGTGGACGAT
AAAGTCATGATGGAGTCATGACGGAATCAAACTTCGTCATGC
GGCGCTGGACTGGATCAGTTCATCATCTACTGCGATCTGTTC
TTGATTCCATCTATCTCACTAGCCGATGCCTTTGATTGTAGC
CCGAGCAGCACTATGAGACCTACTATAATGCCTGCCTGGTCG
GGCTTCTAGAGGCTGCTGAGATCGAAGATATGCTATTCCACC
CAGGCATTGTCACCATTTCGATGGATGGAATCAGCCGGGCAT
GGGAGGATGGAGAGATGATCGAGGAGGATGGAGAGATGACTG
GAGTATGCAATTGAGACTGGCTCAATCAGCAATCGTATCTGG
CATGCCTTGCTCTCGAGAATCCCTCTACTGATTCTCTATCAC
TGTGTGTGTGTGTGTGTATATATATATATATATATACAATAA
CAACAGTTTGGTAATCTTAGCCTGTAATTCATGATCTGCATAG
AATATACACACTCTATATCATCTTCATCATGATACACCTAGCT
TGTCTGGCGTGCAGGAGTGTGCTGCACTTCCGACGGGCCTGAT
CGCGATGTTCACCAATGTGCTGCAGCAGCGCCGTGAGATCGCG
CGAGCGGGATGTCAGCTACATAACGCAGCCGGACGAGATGGAT
GGTGCAGGCACGCGTCCAGCACATGAACTCCCAGGTCGATCAT
GCATCTAACAAATGCGACGCAAGATTGGCGCGGTGTATGCCTG
ACCAGCGAGCCGTCGCCGATGGTGCAGCCGTGCAGCATCACCT
TCTCGATGAACTCGCCGCTCACGTTCATGCCCACTGAGACACG
CATCAGTAAGCATGTGTATAATGCAGAAGGGGTTCTTCATAAA
CGTTACCGATTGCGATCTGGCATGCACCGGTGCCATCTCCGCT
GATACACAACACCAGTTACAAGCAATGTGGCTGGTATGATGAC
TGCCTGCTGTTCCATTGTTTGCAGAACAGCTTGAGTATCTTGC
CATGACCGCGCAGGATCCGGGTGCGTTCAAGCATGGCCTCGAT
CACACACACACACACACACACACATATATACATGCACAAACAC
ATGGGGCTGCGGATCTCGTGCGCCATCGACGCAGTCAGCGCCT
GCATTGCGTCAATGAGCTGGTGTACTCGTGGTGGTGCGACGAG
ATTGCTGAACAAAGTCCTGTCAATATGAGGAGCCATATCTATC
TGTATGCATGCTGATACTGTCATAAGTAGCACTTACGACCGTT
CGTGTCCGTGCGCTATCAGGGCTGTGCCAGCCAGGGCATCTGCT
TGCTCAGCTTAGAGAGATGGATATGGTTTCTAGATCAGAAAGAC
AAGGTAGCCTTGCAGAACCTGATGCAGAGGATGGACCCAGATGC
CATCGATAACACCGTCACCGCAGACAGTAATGAGACCGGCTCTG
TAATTTCAAAGCCTAGTTGAGGACTAAATCCATCTTTGGGTTTT
ATGTTGCGTCCCATCTGTCATGGGAGAGACTCTTATGGGACTCG
AAGGTAGCCTTGCAGAACCTGATGCAGAGGATGGACCCAGATGC
CAAACAATCCCATCAGCCTTAACACAAACTCCGGCTGATGCTGC
CAAGGATTTGCGCTGGATGCAGCGCTCCATGAAGGAGCGGGCCT
AACATGTGCGCGGTGATAGAAGCACGCCACTTGATCTCTGAAAT
TTCTTCAGGCAGGCTTGCATATAACGCTGATGACTCACCAAAAT
GGAATATCTTTTCAGAATTGTTGCAGTATTTGCAGCATCTGGGC
GGGCGAGCTGCTGCAGGCCAACGAGCTGCTGGAGCGGTGCCGCC
GGCTGATCCTCCATGCTGCGGACTTGCAATGAACGTGACAGGTT
GTTGCATTAATCACGCTCTGCTCACTTGCGAAGCAATTGTGTCG
TGATCGACGAACTGAACGATGTGCTCAAGCCCGCCGTGCTCGAT
CTTATGATGATGTGGTTGCAGGATATTGCTATATATCGGAATTT
TCCGGCAACATCACGCACAACCTGCGCGACTTCATGGTGGTGCG
CTCCGCGCTTGAGCGGCACACAAACGAACGAGCGCAGCTGCAGC
CGCTCCCATGACTCCAGCACGGCGATGGCGTCAAAGCCGGCGCT
GCTTGCGCAGCAGGACTTCCGCCATGCCGCTGCCCATGGCGCCG
GCGTCCTGATCCTGCATCAGGTCTTCCGCCATGCAGATCGGGAA
CCGCAGTCAAGTCCGCCCTCGCTGCTGCCAACTCCGCCTATGAC
TGCGCAGCTGGATCGCGCCGCGCAAGGCGGGATGCGCGAGCTCG
TGATGATGTTATTCCGGTGTGGCATCAGGATCATATGTCTAAAT
CAGACGGAACATATGGCCTGATAATACAGGCTCCGGCAACATCT
CACAAATTGATGACCAGAAGTCCATCGCTAAGCAAGCACTTTTG
AGGCCCTGGCGGCAGAAGATCACGCTGCGATCGTCACCAAAGCG
CATGACCAGCTGACCGCGATGCTGACCGCAGCAGATCTTTTTGT
ACAATGGCAGTATGAGTTTTACGCTGCCAGCTCCATTAACTGAT
CGTGGCCGAAGCAACCATGATGAACAAGCTGGCCCAGTCTGTGT
CGTGTCCGTGCGCTATCAGGGCTGTGCCAGCCAGGGCATCTGCT
GAGGTATGTCTGGTGAAGCTTATGGTGATGTAGCAGCAGGTATC
TGCAGCCAGTCACGTACATTCAATCCATCGCCATAGACCGGCAG
AATAGTTCATCAAGGATATGTAAATGAAGATATATCTGAGTTTTC
CACGCCGCGCTCGACNATTCACGAAATCGCGCGTCAGAGCGACCG
GATACTTGCTACCGGTCATCTGATAGACTGCCAGAGCGTCTAATT
AGCAGCAGTGACCAACTCGGATATCTGTCCTCGACCATCAAGCAT
GCCGAGAGCTTCCGCCAGCGCCTGAGAAATTGCAGAGCAGCAACG
TCAACGAGCGCAGCCGAAGCCGCGCACCCGAGAGACGCTGCGCCT
CTTGCCCCAGAGAAAATGATCTGGCTGTATCCAAATCTTCTGCGG
CAAGTCGCCTTTTCCACGCCGATCGGATCTGCCATGCGTAGCGAT
GTCGCTATTGGGAGGATTCCGAGCCACATAATCAGCAATGGCCGC
TGCTTATGCGTACATCACATCACGCTATTCAGATGGTCGGCCCGG
GATTCGACCAGGTCATGTATATATATATATATATATATATATATA
TGCATTAAATCCACAGCTTGCAGCTCTTGCGCCACCACCGATAGC
CATCCTCTTTTGTGAGCCACAGCAAATATAGGGTGGCGGCTTGTG
TGTCACATGTTATGGTACCTGCATCTGTGCTCGGAGCATGGCGGT
AGATTTGTACTATCGCTTGAGTACGGTGCCGATTCGTGTGCCAGC
CAGGTTTGACTACAATGTCACTCATCACTCCCTCCCATCGCCGCG
CATCATATCGTCCACGTTGGTAGCCTGTGCCATCAGGTCAGCGGC
CAGGGCCTGACGCGACGCCGGCGTGGGGCGGCAGCGTGATCATGG
CACTTTCTGCCGAGCCTGGCGAACGCGCTGGCGTATGGAGCGCAT
CGCGCAATCTGCTTCGCTACGGACGTTGAGAGCAGCAACGAGATT
CAGATACTCAAATATCTGCCTCACTTAATATTTCATCATCAATAT
TAGAGTGGGACATCATTGACGACTACTCAGATGCAGCACTCAAGG
AGCGCCTAGCATTGAGTTACCAATGCACCGCCAATAGATGAACCT
TGATCATTCTGCTGCACTAGATAATGTTTTCCAGTTTCATGTCTT
AACAGTAGCAAGACCAATAACATCATCACAATATGTCCCCTAGGC
GGCTCTGTGCAGATCAACACCATGATCGACGTCACCGAGACGGCC
AAGCCCGAAGTCTCTATGCTCTGCTTTGCCGTGTTGCCCACCATA
GAGCCGGAAGCGATGGATGCGCCGCTGCCTCCGCAGGCAACGATT
TGTGTGTGTGTGTGTGTGTGTGTGTGTGTGTGTGTGTGTGTGTGT
ATGGGTGAGCAGTTATACAATCAAACGTATGCTGAAGTATCTTAT
CAGCGTTATAGCATATGGTAGATAGACAAAGTGTACATCATACAT
GCATAGTTTTGCAACTTTTACATCGATGCAATCTCATCCAATCGG
TGAGCAGCCACAGCAATAATATAATCAATATATTCTTGGTCAGTG
CGTGATTAATTCGGATTCGATCCGTTGCTCGAGTTGGAGCATCAG
GTTGTGATCAGGAGAATCAAGGTAGTGGAGCATTTGCTGGCCTGC
GCGCTTTCCCCATTTGCTGAAGCTTTCTCATCAGTGGCTAATTCTG
TGATGCAGTCAGCGGCGGAACAGTACGACATATCCTTAAAACACAG
AGAGTCCAACGCTAGGTTTGCTGAGGTGGGCAGAGAGCTGGGCTGG
CCAGCTGCAAGGCCTAAATGATGCGCCCAAAGGGGTCAATCAGCGC
ATTTCTCAGGATTGGCTCTCAGCGAGTGCCAAACACACGGTCAATG
AGCTATGCACAGAACGGAATTGTCCGAAGTGTGCTGACTAGGAGAG
TACATGTGATTGATATTCTTAGGCAATGGCGAGTAGATGTAAATCT
CTACGGAATAGCGAAGGCATAATGGCTAATACATTCGAGTTGATTC
ACATCTCAGCAGGACATAATCGACTACAAGGCACACAGGGGATAGG
CAATGAGTATCATGACATATTGATCTATGGATTTGAAGTCGAACTA
CAAATCGTGCAAATGTAATGAGCCCAGATGCTAAACACGCTGGAGC
TGTAATTCCTCTCTCAACGTCATGTTCATTAAACCATTGAGACATC
GGTGCCGAAGTCTGAGCGTAGGCCGATGCCTGCTGCTACTCCGGTG
CCTCGGCAGTAGGCCTAGTCCAGGTTGAAGAGCTGCAAAGCGGAGA
AACTGCCACCGGCTGCGGCTTCGACCATGGGTGCGTCGCGGCTCAT
GAAATCAGGGCGAATCGCTCGCCGTCTATCTCTCTCACGGTCATCG
ATCGAGAAGTTTTTGCCAGTGCTGCGACGCGCCCGCGATGGCAATA
CATATCCATCTACTGACCATGATTCTTTCCCATTAGAAAGCGTTGC
CATACATGCCGCTGTCGAGCAGCTCGACGCCATGCCGCTGTCACCG
AACTGCCACCGGCTGCGGCTTCGACCATGGGTGCGTCGCGGCTCAT
GGTCTGGATCATGTCGTCCTTGAGCTTCAGCCCGATACGCAGGGCG
CGGGCGATGGCTTCGGCCGGCAGCCAGCCAATCTCCGCCTGGGCAT
CAAGCGAGGTCTCGTTCAGATCAGCCGGGGTGGACTGCGTGTTGCT
CAGCAATGCTCAACTGTAAAGCTGGTAACTGGTGGGAAGAGAATCC
AGATACAACCTCATAAGCTGTCTTTGCCGCACCTACTAAGCCAAGC
GTGTGTGTGTGTGTGTGTGTGTGTGTGTGTGTGTGTGTGTGTGTGT
TAAGTCCTCGCAATGGTCAGCGCAGGCCGAGGGCCGATACAGATGA
TGGTTGAGGCCCTGGCCTTTGCATGGCTCGCATGGGCGCACAAAAC
GACAGTTATGCAGAAGAATCTATTGAACTATCACCAACTGATGATG
GAAGCCCATGGTCTTCTGCCCCACGCGCTTCTCGATGATCTTGTCG
CAGCAATGCTCAACTGTAAAGCTGGTAACTGGTGGGAAGAGAATCC
CAATTGCTCCTGTCTACATGTTGTCCGTAGTAAATGCCCATTGGAT
TGTCTTGTGGTGGTGTGCCTTACAGGCGTTGCGTCGGCTGCGACAT
CACGCCAAATGCGGTGGTGCTGTTCTCGAGGTTGCGAGCCACTCGC
ACGGGTACTCCTGCATCGCAGTCACCGACTGATGCGTACGGCTTGG
CTGTCCTCGTCTGCAATATCCATAGCCAGAACCGCTTGCAGTTGCT
CTTTCATTATGGCTTCGAGCCGTGCTTCTGTGGCTTCGAGCTTTCG
ATTAGCCATTGGAAGATAATAAGTAGCAGAATCTGTGGTATTTGCT
CAAACCAATCAGCAGGAGCTGCCTCAATTTGCTCACTTTCTTGTTG
CATCTGAGGTATAAAGCCCAGTGTTACCCGATGCATAATAGGATAC
AGCAGCAATCCGCTTGGCAGTAGCAACGGCCATGTCGCCTACTTTC
CTATATAATAATATATATACACCTTCTGCGGCATTAGAATCGCTTG
CTGGTGTTCACGACGCTCGGCATGTGCCTGCTGGCCTCGGTCAACG
TTTGACATAGGCTGAATAACAGATTTATCGATCATGACTCCTACAT
AGATACCAGCTTGCGGATATGGTGAACCAAATGAATGTGAATATTG
CTGCCAGGATGTTATTAGTTGCAGACACTGGTAATGGTAAGATCAG
CACTATCCATAACATCTACACATTACGTGGCGCTCTAGTGCGTGAT
CTATTTATATATATATATATATATATATATATATATATATATATAT
AGCCATCTTCTCCGCAGCCTTTACATCGGCTGGATTTTCTGTGATG
CACACATGATTGCATGAGTTAAGTCTTTATGATTATTGCGATCGAA
ATGCGACTCAGCTTTGTCGCTGACGATCTCGACTTTGGTGGGCAGT
TGTTCCTCACGGTCATGAAATTACTATGTCATATTCAAGCGCTACG
CGGCTGTGCGACCGACTGGCCATCGTGGACCATGGGCAGGTGATCG
CATATCCATCTACTGACCATGATTCTTTCCCATTAGAAAGCGTTGC
CACTATTCAATCTCATTTTTCCCATCTGGATACGGCCGATCCATCC
CGATGGCGGTGGCGATGGCGGTGGCGAGGGCTCTGGCGGTGGCGAT
CAGCGATTACGAGTTCATGAAGCTTCAGCCGGGCCGCGTGAACACC
AGAAGCAGGTATGAAGCATACGATAAGCAAATAGAAATCAACCACT
GGGGGCGGTGAACGTCATGGCGTCTCGGCACATCAGTCTGATCTGCT
CATACATTCTTTGGTATTCTCTTTCCAAGCAGATAAGAGTGTCGCTA
CACATTTCTCTGGAATAATTGCCAGCTAGCTAAAAGTTATACGCTTG
ATGTCAAAATGGGTGATGTAGCAAGTACGAGATGGAGAATCTCAAGG
GGCGCGGATCTGGTCACAGGTGGCGGTATCGATCTCGATGCGCTCGT
AATGCTTCCGAATAAGCTAATTCCACAATTGCGAGAGCGCCACTTTC
AGTCTAATGCGCGTGACGATGCGCTTTGCGAGCACCAGCGGGTCTGT
CCACAATGCGTTCGTTGAGAATATACGATTACGAATGACTTGTATTG
CAAGCCTGGCGTTGTCGGCACTGTGGCATGACAGGCAACGGTGAGTC
GAGATGGCGGTCGGTCGTGCGAGAGCGCCGCAAGAGCCTGTGCTGAG
TGGAACGACAATTACTTCTTATGGCTCAGGAAGCGTGACATCAATGT
CGAATAGCAAACAGCTCACCTGCTGCACCCACTGCCGAATAAAGTTC
GGCCAATGCCAAGCGCCATCCAGTAGCGCGCGCCTGTCGCCGNGCGT
ACCGGCGGCGCAGCTTCGAGGCGCGCTGCGCCGACCACATCGCCAAG
TATGCTGACATTCTTGTCCAGCATAACAATAACTGCGCCATTTGCCA
CCAGCAAATTGTCTTGTTGTTCGACAGCAATGGCAATGTTGCCGGTG
CCGACGTGTGTGTTACCCAGAGAAGCAGCATAGACATCTGAAAGGTG
CCAAAGCATACCACAGTTCATTGGCATAGAAGACATTCTCAAGATTA
CGCATTGAAAGAATGAGATCACGAGTTAAGTTTATGCAATCAAAATC
CGCACATCTGGACGATTGGCTACGGCCACGTGCTCTACCAAGAGCAG
CGCAGCCGAATAGAACGCCATCTGCAGCAGCGCGACGATCCCCAACT
ACAGAAGCGAAATGAAAGGCAACACCATTAATATGACGAGTCCGCAG
AGCAAATCGTTGACTCCTGCGGCGTCGAACTGGCGACTGAGACACGC
GATCGTCGGCTCGGCGATGGGCGGAGCATCCGCATCTGCGCAGCCGT
GGAAAATGCGTCAGATGATATCTTGATTGCATATCTGCGAGAATATT
CATTGTCTGACGATTCTGCTCCATCATGTGGTTCATATTCTCTCTGT
CGCTGCCTGAAGCTACTCTTGTTCCTATCGGTGTTCCGGTGATGACT
GGTCGCGGTCTTCGATATGTTTGAGCAGCTGGGGACAGGTGTCGTGC
CAACGGTGGAATGATTAACACGGCTGTCGCCACGCGCGGCACAATCC
TGCAAGTGGCCAGGAGCAGATCGTTCGTCGTTGGCAAAGGTCACAAT
GATGCGGAGTTCCGGCCAATCGCATCGATCTGCCCAGCTTTATCACT
ATGCTGTAGGGAAAACTGTAATAGAGTGCAACTCTCTGCTCGTATCT
ATTCTCTTGTGGAGATGATCTTGAATGGGAAAGAGTGCGCACTTTTA
GGAATCATTATCGAACGTCGTCCAGATGAAGCAGCCTGGAAGCAAAT
CATGCACGAGGTCACGTTCCAGTCGCTGCTGCACCGCCGATCGATGG
CATCGCCGCTGATGTTGAGCGGGAACGCCACCTCGGCCGCAAACTTG
CAACGGCAACGGCTACTGCTGAAACAAGTGCAAGCGCACAACTTACC
CCGAATCAAGCGATGAAAGCTCCGAATCGGAGAGCGAAAGCGAGAGT
CAATTTCCGCTGGCAGCTCTCATTCGCTGATTTTAAAAGATGGAACT
AGTGGCGCAGATCCAAGGTCAGCCCGCCGGCCAGTAGGGCATCGTCG
GAGTTTGATAGCGATATAGCTCGTATGTTTGTCGTTGATGTGGAGAC
GATGGCACCCGCATCATGTGACCTACGCCAGCGCCGCGAACGTCAGC
CACTCGGCAGCCACTCCGACAACAACCCTGATGATTTTTGGCTGAGC
CAGTCTCTTCTTGCTTTTGCGCCTTCTTGATTGCATAGTCCTGCTTT
ACTGAATCAATCGCGCGTCGTCGCCGAACACCTCGTTCATCGTGTCG
ATTTAGATATACCATCTTTATATGATTGTGCTGTTTCATTACTTTCT
ATTCTTCCAACAACTATTCATCATAGACCGCAGTCAATTTCATAAGA
AAGACTGATGATGACATGACAATGGATTTGGACAGCGACGTAGACAT
TAAGAATATAAACACGCCGATGCACACAACACCGGACATGACCATCA
AAGCGATGGCATGCCCAGATTCTTTGATAATCCGCGATTCTTCTATT
GGGCTAATAGTAGAGCTGCGTTAGTGCACTTTTCGTGCAGATTGTAT
TCGTAAATATCCTGCTCGATCAGCTGCGAAAATTCGCGGAATTCACT
ACTGCCTGAAGAATTGCTTGTCGCAGGTGTCGGACTAGCTAATAAAT
GCGAGCGTGTTGAACTGATTAGCTGATATGAAAGATTGAGCTTAGTT
CGTGTCTCAGAACGAAGACACTATCAATGATGCTAAACAAAGCCGTG
CAACTGAAGTTGCCTGAGTTCCGTTTGCTGTGAACGCGGCGATGAGT
ATCTACTGCAAGGTAAGAGCAGTTGTAACCAGCTACATTGTCACGCT
CGTCGTGATATTCGTTCTCCACGCGTTGTTTGTGATCCTTCAGCACGT
AATCCATTGCCTAACAACACTGGCCAAAACGCCCACTGCGCCGCACAG
GGAAACAAAATGAATTCTCTGGAGCAACGGCTGAATGATTATATTATC
GCTCTCTGGATCGGCGGCCTGGGGCTTCTCTGGACATCTGTGCGTATG
AATCTTCGTTGGTTAATACAGGCACATGCTCAGTACAAAATTAAATCT
GGCGTGAATGCTGCTGGGCTTGGCTTTGAGGCTGAAGATCGACTCGTG
TACACAATCAGAATACTGACCATCGCGGCCTTCATTATTGTTAACATG
AATCTGAATCGTATGTAAATCCTGCTGATGCCCCGGCGTTACCAGTTG
GGGTCACCCTGTCACAGCACACGCGGCACTAGGGCTGCACCAGGCCGT
CATGGCGAGGGAAGAGCGGTGGATTTGCGCGTAGCTCGATGGCGGCAT
CCTGTGACAGCCGTTGGAATAGGTCAAGTAGGATGCCGGGAATGTCAT
GCTGATGAGGCAGAGCAGGAAGAAGCTGTGCATCAGGGTGGAGAGCAG
TCAAGGGCTACATCATGATTGAGCATATTACAAGGTTAAGTTACGACT
TGTACTTATCCTCTATCTGGTGTCGTATTTCCTTGATGAGCCGCTGCG
CGCGGATGATGTCGCAGCCGCCGACGAACTCGCCCTTGACGTAGAGCT
CGATTGATTTATGCAAACGCAAACAATGGCGGTTCAGGCTCAATTAAT
AAGCGATAGCCGCATAGTGCCTCGATGAACGCCTCCGGCGGGGCGCCT
CATGCGGCCAAGGTGAGGATAATGAGTCAATCCACTGGCAAAGGGTCT
TACGAACTTTGGCGCCGATCTGTGCATTATGGAGGAGGGCACAGAGCT
TCCTGCACATTATCAATGCTGGTTTGTATTTTCTGAATACCCTCTTCG
CATCAAAATAGTCTAAATAATGTTCAGTGTGAGTGAGAGATATAATAG
TGCTGGCGGTAGCAAAAGCAGCCGTGCCAGATGTTGTTGAATAGACGG
GCCATAGGCATTGGAGAAAGCATCTGTGCCGGCTGATATGCTTGCTTG
CGTTGGTAGCAAGCGTTGGTGGCAGCGCACTATGCATTGTGTACCAAC
CACTAATGAATATCTCATTTGGTGCCGCTGTTATCGTGTTGTAAACTT
TCTTGCAGCTAGAAACTTTGTAGTCGAATTTCCATTAGCTGAGTACAT
GAATCATCAATTCCAGACGTTCGCGCAGGCTCAGGCGTTTTTCATCGC
ATACACCTGAATTCAAGGGATTGATCAGGAAAGTTTCTCACATGGGTC
CATGACGGGAGGGTGTAGCACTTAGCGATGACCGATAAGCCCACTCTT
CCAGGGCCATCACAATTTTCTTGGTGATTGATGAATACTGAAGTATAG
GATCCTAAATGCCGAACCAGATTCGCATAATGCAAACATGATTAGCCT
CCGTCGCCGAAATAATTCTCAATCGCTTCAGCGCGAAAGCCAGTGACG
CAGACGCGCGCCCTCGACAGATTTGATTGCGGCGACGATCTGGTCAAT
GCTTCGATGGTGTCGGCGGCTTCACCATAGACTTCATATGCGTTCGGG
AATTAAATGATGTATACTCTCTTATCAATCATGATAGGAGGGTATATG
CTGGATTAATAGCATATATTTTTCCATCATTTGATCCAACATAGATAG
CTTGAGAAACAAATTACACATTATTTGACATATTATGACTGATTTAAC
CATCAATATTGATACAGTTGCCGTTGAAGGCTGTAACGTACGCCATCA
CTTGTCTGTTCCAAACACATTACAATGCAGCCCATCTCGTACAGAAAT
AAGGTCTTTCGCGGAAGCTATGAATATAGGGCGCAACATCACGCAGCC
CCTGTGCATCGATGAGCTCTCTGTCTATCGCAACGGTCAGTCGGATCG
CCTGTGCATCGATGAGCTCTCTGTCTATCGCAACGGTCAGTCGGATCG
CATGGCGAGGGGAAGAGCGGTGGATTTGCGCGTGCTCGATGGCGGCAT
CATCTACAGGCGGCTCTTACGGATCATATGCTGGCGGTGGATTTGGCG
AAGGTAGTATTGTCACGCGCCGCTGAGTTCATGGAGGATCTGGTGATG
CATATCTGAAAGGGCATCTTGAGCATCAAATACTTCTAAAAGAAAGTA
CTGCCTGACACACCGAGTCAGACAGCTCGGAAGATCGAAGCGTCCCTG
GCGCCCGGGATCTGAAGATGAAGAGCATCCTCTGGGATATCGATACAC
GCTCGCGCTGGCGAATTAAATGGCATGCCTCGCCATCAACCATTACCT
CAGTGCGCCAAGTGTGTCTACTGTGTTGAGATCGTTCTTCATATTCAG
GGCATGGGCCATGAACACCTGCTCCTCCCTCGCGCCCTGCGCCCTGCT
CAAGGATTCCTTATCAATAGCTTGCGCCTTGAATAGATTAAATGCAAG
CATTTCCACAATGTCCTCAGCGGTTCCGGCTGAATAGACCTCAACAAG
TCCTGGCCGCTCAGCAGGACATGGCAAAGCAGGGCAAGCAGCTTGTTG
CCTGCTCTTCGCCACCGCGGCCTCGCTCGCGCCCCGCCGCTGGCGAAG
TCGAGCGCGCAGTTCCGCGCGAACTCTCGCAGCAGCGTCTCGCCATCG
TGCGCTTCCTCTACGTGGCGCATAGTTGTACCTGCTGGCTGTATACCC
CGTAGGAGGCGGCGACGGTGGGTATCAAGCATGGCGAAGACCGCGCGC
GTACATCTAAGAAGTGCCGATACAACCACAGGCTGGCAGTATTGCTTG
ATTGTCAACCTATGCGTCTGTTTCTGCTTTGGCAGTTTCTGGCAATTT
TCATGTTTGCAAGAGTCACACCTTGCACATCACAATTGCATATTCAAG
GGTTCCGGCGTGAAGGCCGCCAGCGCGCCGCTGGCATCGATGGCGAAC
CCTGGGGCAGCAGGTCTGGTTGCGCGTGTTGAGCTACAGAGCTCGCAG
CCCAGCAGACTTTCAAGAGTTTGATGCCGCCGTGCTGATTGTCGGCTT
GGTATCGCTTGGGACAAGACATCAGTGGACATGGGATGGAACGTGGCT
GGCAGATGTTTCACGAACAGCGTGAGACCAAGAATGATGATGAAGACT
TCGTTGCCCAGCTCCAGCGACACCAGAGCGGCCATGATGCGCAAACGC
AGGAAGGCAAGATCTCAGAGGACGACGAGAAGCGCCTCGAGAAGGAAG
GAGTTCATAGCGGCGTTTCATGCGTCCGCTTTCATAGCGGGTGATCTT
CCCAGCGTGACATCACCGATCGCAAGCAGGCGGAGGCGTTGCTCAAGG
GCCAGGCATGGTCTCGCGTGGCGCTGCTCTTGGACTGGCCGATACGCC
AACATCTTCTTGCGTTGCGTACATCATGCCTTCTGGCTATTTTGTTAG
TACGACTGTGTGTGTCCATACAAACGTGCCCCATAACACAAGTGCATT
TGACGTCCTCCGCGTCGATAGCGCCGCACCGGTCTGCGCTCGAAGATG
GGTTTTCTGCTTATGATGATGGCTTTGATATATATGATGACTCTGAAT
ACAAGCTTACCTGTGATAGTTCTTGCATATATACCATACTTTAGACGT
GCCTGATAGGCACGGCAATCTATGTCAACCCGCACGCCATTGCCTTCGT
GAGGACATCCCAATCTATCCAATGGCTTCGACCCATATAGCCAGGATGT
CTGACTTGTTAGGCATATTCGTATCTGCTGCGTCAGGTAACACCTACAA
ATTACCCTTAGACATACACAACACAACACAACAGCAAGCCATCTACCGT
CGTGCATTGGACAGTCCCCGTCGCCTTCGTCAGCATTCCAATGGCCAGC
TTAAATAATCACAGGTTAAGATTCGCCATGAATATGCAGCTACCTTTTC
CGCTCCGCAGCCATTGAGATTGCTGAGCAAGACCCTAGGCTCAAATGAT
TAGACCCAGTGACATAGACGGGCACATGCTAGGCGAATTTGGCGAATGC
CCTATATTCCAAATCTAGATCTCAAAGCATTAAAGTTCTGTCTTACTTC
CGCACCTACGACTGGATGAAGAGCTGGGATTTCCTCGAGACTGCCCCAG
AACAGCGCCAGCAGCAGCAAAATAATATCGCGCACAGCCATTATTTAAT
AAGGGAATATCTCGCGCATTGTTCTTCTCCGATCTCATATCAACTTGCG
CATCTTCAGCGTATTTTCGAGCCGTTCTGGACCAGCAAGGCACAGAGGG
AATAGTATCTATAATGTCAGGGCTTGCAATTACAGACAGACCGGAGTCA
CCGTCCAGTTGCGGTTACTCCAACTACGATCAGCAACTCGATGTAGTGC
CCTTCCATGTCCGTCACTGGATGTACATCACCGAATGGGTTAGGACGTG
AACGCACTAACACAAGCAGCAAAGCACAGCATCCGTAAGCAGACGTTTG
AAACACGATCACGCAGTTTGACTGTCATGCCCAGACGCCGCCAGATTAC
TGTTGGTCATCAGTGACCTTCACTTACCTTACCATCACGCTAAATCATT
GCGCCGCCGTCGTGCGCGGGGCGACCAACTGCTCGAGCAGCTGCAGGCG
CAATGTTACAAGACCCAAGAGATGCAAGACAGCAAGGAGATTATAACTT
TGATGCCCCCCATGATGGACGGCCAGCAGCCGTACATGCCCATGATGGG
CACCAGCGAGTCGCTGGCGCGGGAGAACCTCACAAGGCTCCAGGCCAAG
CCTCCTATACATATCAATATACTCAACCAATTTGCATCCCCCACGCCAA
GCAACAGAGCTATTAATTACACTGGACATACAGAACCTACTCCGAATCT
CAATACCAAATTAAGTAACCGTGCTATATTAATATGGCGCAATGGAGAG
CCGCCACGATCAATCCGGTACTCACCGCTTCGCAGGCAGCCCAGTATAC
CCGCGCTGCTCCCCCCCCCCTTCGCGTCGCTCTCCAGCGTCATTGCACT
CTTCCAGAGCTTGCCTGTAATGTCTTGGCAGTTATCCTCAAAGTTCCCA
CATCGGCGATCACCGAGCTGAACTTCAGATCGGGGTACGATTTTGTGAG
CACGCAGCCGCTGACGAAATTCTTGTCCCGGAACAGCGCGAACTGGATG
ATATCTAGAACACCATCGTATAATCAGTGTCAGATTGACAAGGAGAACG
TGTGAACATGGCGCTGGAGATTAGGGGACTGAGCCAGCGCCAAAGGGTG
CCATCTACTCGCTACCCGCTACTCACTACTCGCTACTCTCCCTGTGTAC
GAATCACGAAAATTGCCGATTATCGACGAAGCGGAAGCACAAATGATCT
TGGTTCTATCCCAACCACCAGCTACACTGACAGTAACAATAGAGTCATC
TCAGAAAAGCCTAATTCAATTGAACTTGCTGGTCATGGTATCTCCGCCT
CGTTGGTTCAACTGCGATTATATCAACCGCCAAGCCTTGGACAGTGTGG
ATGTCCAAATCAAGTATGGCGCAAATCATCACCAGCGTCACCATTACAT
CGAACAGATGCCCGATGGGAGCATCGTGATCGAAGACGGTTACGGCAGT
GGCAGCACACTTGGCGGTCGTCCGACCGCACTGTGGAGGCCGCAGATAC
CGCCCGAGTTTAACCGTGTGCTGAACTGGTTGAAAGAGCAGACAATCAC
GCACTCGAAGACAAACTGGCCGAGCAGCAGGCGTACATCGCCAATCTGC
TCGCCAAGGCGTTCAAGGCGCTGTAGGCGCTCAAGGTCCTGTTGGAGCT
GGGTGCTGACGACTCGCTGGACGTGTTCGGCGTGCACGGTGTCTGCGGC
GATGTCGATGTTTTTGATGCCGACGGACTTGGCGAGATCTTCGATTTTG
GGGTGCGGCTTTCGATGTTCTCCTGCAGCAGCCGGTGCAGCAGCTTCAT
CATTACATATAATACCGCATCCCGGATTTTGGCAGCATCCACAGAAACC
GCAGATCGCCATAGAGATCGTCCCTGGTATTTCCAAGTATCAACACCGC
GAGTGGTGATCAATATGGAAGACGCATCTGTTGCAGACTGAGCAATGAC
CTTGTCCACTAATCTCTCCTGTCGGCTTGGCCGGGCAGCTCGCGCAGAT
ATGCGCAGATGCTGTTCGATCTTGCGAATGGGCCAGCGCTCTGCCCAAT
CGTCGGGCTATCCAAGCCAAACTGAAAAGCGATGCGAAGGCACTGTCCG
ACCGCAGCTGCCGCCATTTATACATCCGCCAGGACCATATTGAGGTCCT
GGTGATGACGACGGATACGATCATCGCCGGACGTGCATTTTCTGCCCGG
GATCGCGATAGAGCCGATACCCGATCACTTTGCGCAAAGCATCTTCGGC
GGAATGAAATGGAACGCATGGAAAGAGAAGAAGATTCAGACATTTAATG
GATTTCGATCTGGAGGATGAGCGTGCTGAGCAGCAATTTCGTGAGCGTC
CAGGTTGTCGCAGGCGAATTCCAAACTGCAGCTGCTGATCAGTCGCCCG
TGATTGATTGATCATTGGGCTTGCAGCAAATGGTTTTCAAGGTATAATC
GCAATTGCCAAAAATTTAATCTGTATTGCTGATATCAGCAAAAAAGTGG
GCTCGTCGATCAGATCGGTTCACAGCTGCGCACGGCGCTGGAGGGATTT
CAATCCATACCGCCATCTCAACCTCAAGTCAGAACAGAAGAAGAAAAAG
AACCGCAGTATCCGGCACATCGCTACTCACCTGCCAATCCAACCGCTTC
AGGCGGCGAACTGGGTCGAGGGCGGGCAGATCGGATCCATCAGGCAGGT
GACAGCGGCAGCGAGGCGGAGATTGAGGCACTGGCGCAGAAAGCCTTTG
CATCAATGGCCGGCCGAACTACAAACTGATCGTCATTCACGATTACGGC
AGGTGTAGTGGGTGTGTTCTTAGGTTGTGCATACACAAGTCCTACATTG
GCTTGTTCAGCAATGGCAGCGAGAATAACTACGGACACTGGGGCTTTTC
TGAGATGCATTTGTATTATGAGAACGGGAAGCAGTTTATGGTGCGGCTG
GAGGAGAGGCCATTAACCTGATCGCCGCCCGTGCAGTTCAGCACAACGG
AATCCATGCCGCACAACGATTCGGTGCTGAATTCCGCCCGTCAGGTGAT
TGCACTGGGCCTCAGTGGTCGAGCGGAGGTTGCACGGATGAATGCCTGT
AACGCGCATGAATGACCTAGATCGAGGCGCTCGACTGCGAGGCCCCTAG
TATTTATCATTTAGCTTGCATCATTACGCTATTATCATAGTATTCACAA
GATCTTGAATCGCGGGTCCCATGCGGCTGTCGTCAAAGTCCACGAAGTG
CTGCGGCCTGGCGGCTGGAGGGCCAGGGCAAGTGGGCGGGGCTGATATT
GATGGGCGATTATGTCGGTTATCTGTTGCCGGCGACGTGTTGTTGTGCCT
TAGTGGTTGAGGTCGGGCTCATGGCAGCCATCGGGGAGCGTGGGGCGAGA
TGACAAACTGTTCAATACAGGTCGCACCGAAGGCACTTGCTACACGCACG
GCGCCCGCCGCGTCCTCAGCGAGTTCCGCATCCGCGGCGTGAAGACCAAT
GTCGAGCGCATGGTGCGGCGGGTCGCCGAGGCCAGCATCCGGCTCGAGGT
TAGGTCGGCTCCGTGCGCCAGCATGTAAGCCTTGGTCTGCTGACGGACAG
TAGTGGACCTAATGACCTCAAGCTCTACAGGTCTCGCTAGGCCATTGAGT
GCGATGGCTGGGTGCTGGGCAGCGCAAAGGAACTTGGCGGCACCGTCTCG
TGAGAAATTGATTCAATTGTCAGAATCATCCTCTTTGAATATAGGTCATC
TGCAGCAGCTTGAGGAGCGTCGTTTTACCCACGCCATTCTCACCAATAAT
CATCACTCCATGATCGTTTGGCAGTCTTGGGTGCGGAGCTCATGGTCAAG
CATCATTCAGGCGGTGGTTGCCGCGCTGGTGGCCCATCGCGGGCGCCATC
GATGCTGAAGCGCCGTCCGCAGTCGGGAGCTCTGTTTCCTTATTTTGAGG
GCGCCATCCTCGGCGCGGATTGCTCCGCGCTCTGGTGGTGTTAGGCGTAT
GTTCGTGCATTGTGTAGACGATCAGCTAATTTAATGACCAGGACTCTGAT
GTACATATGATGGTAGCTCTGCTTAAAGGGAAGATGCAAAACTTCTCATC
GCAGCGCCGTGCGGCGGAGCTCGCCGCGCGCGGGATCCGCTTCGTCGACT
TAGCACTCGATCAGTCATTGGAGTTTCAAGTCCTTTTGATACGAGATGAT
AGACCTTCTGCCTCTGTTTGACATCATTCAGAAAACCCCTAGCGGTTCTG
AGTGCAAGCATTGGTGCTGTGTCTTTTCCAGTTTTCTTATCTACTAGGCT
GATGATCAATGGATGCCACCAAAGGAGAAGTAATTGAACCCAGTTCAGCG
CGGTGTTCGGCAGCGAAGTGATCACCATTAATAAGAGAGTTGTGGCACTC
CACAGCCGCATCAGACTGCAAAATGGCTGCTCCGCCAGCATCGATGAGCT
GTGCTGACGTTGCCGGGAATTGCGGGTGTGATCCTGACGGTCGGCATGGG
TCAGCAGGAACCATCCCGCGCCATGCCAGATGGGCCACGTGCGGTAAGCG
GCTGCAATTCAATTCAGGCGCGTAATGCCATCTGCCGAGTAAATACGGTC
CCGTCACGCCGGCGTCGAAGAGCAGGTTGGTCGACTGCGGCCGGCTCCAT
GCACAGAAGGCTGCTGCTGAGATGGAACTACTTAAGATGACCCAAGATGG
GGTGAATCTGTCAGTGAAATGCTGCTTTTAAAGGCAATCGCTGCTGCTAG
GCTTGTGCCTTTCAGTTCCAATGGTGTACCTCTGTCTGATCTTTAGAAGT
TGCGCTGCTTTTCGTTCTCATCATCTTCATCGTCTTCATAGGTAGTGCGT
GAAGCGCTCGGACGCGGTATTTCTGCTGACGATCAACCATCTTGACGTAG
TGAGGAAGAGGTGGAACATACTGGCAGACGCGGTTGACCACTATAGGAAT
CGAGTATGTCCGCATCGCCGTGAGCGACACGGGCCATGGCATGAGCGACG
GCCAGGATCCACGCTTCCAGCTTGGGGACCGCCGCGCCGCCGATGACCTG
TCGAACCTGTTGTCCCTCACGCATCTGATAGCGGCTGGCGACGGACTGGC
GGTCGCCAGTTGATGGTTGGATTCAGCATTCCTATGGTTGCTCTTGGCGC
GATGAAGTGCGACTTTGATGACCGAGCACCGTACGAGAAGATGAAGAAGG
CAGTGCTTGAGTCATCCAAAACGCGTAATGTGCCATTATGCCCAACTCAC
GCACGGTATGCAGCAGCTGCTTCTCGAAGCCGCGGTCGACCGCCTTGCGC
CGTCCCCTCATAGACGTCGAAGACGCGGGCTGAGGCGATCAGGGCCTTGT
CATTGCCTTATTATAAGGCGACGATGTTGTTGATGATGACGAAGCTACAT
TACTACATGGTGCCTCTGCTGCCTGACCCAGGGCAGCAGATACAGTTTTG
CATCAAATCCTGGAGTAAATCCACAAACTAATATTTCAGGAGCCTTGTAT
GCTGTTCCAGATGGCGCAGGCGTTGACGTTCTTCGTGCATCGACGGATCA
CGTCCCCTCATAGACGTCGAAGACGCGGGCTGAGGCGATCAGGGCCTTGT
CATCACCAAAATTAGGACGAGCGGGATTAGCTTGAGCTGGCCTTTGTTTG
GCTTCCAGTTGTAATACCTACAGCTCCAGTTGTAGTGCCAACACCTGTAG
CTTCAGCTATAGCTGCCTCCGCACCTGCGGTAATTTTTCAGAGATGCCTT
CGCATCATTTGAGAACCGTGGTAGAGTTGGAGGAGAAATCTGTGCTTCTC
GTTTCAATTTCGTCGCGCTGATCTTCGGCTGCATCGAAAAATATTTGTGA
GGGTGCAAGGTCGTGTCCGTGTAGCGGTATCTCGGCCAGCGCAAGCCTGG
CATTTACTTGCAACCCCCAATTAGCTTGTCATGAAATAATTCTGCCATGG
GAATCAAATCATGTCAAATATCACAACATTCTCAGGTGCAAATTTACCTT
GAAGAATTTCTTACTAATAATCCATCTGTGCCAACACAAACTGCAACTGT
GCAAGACGTTGATCCAGTGGACGACGAACAACTTGGCCCCTGAGACACGC
TGAGCATCAGCTACTTCCGCATCGTATTGAGCTTGTGCCGCTGCAATTTG
ATGAATTCACCAATATCACAGGAAACGGAACTATCGCGGCAACATTCCAT
GGCTTCATCTGCATTTACCATACTGTGTCCAGCATAGTCCCCCATTACTG
GATACACGGGCAACTTGCAAGTTAGCACCCGATCCACTAGAGCTTTCAAT
CATCGCCGGCCATGCCCACCAGGCCGCCACCCATAGCCTGCAGCTGATCC
TCATCAACCGCAATGCGAAGTCCGCAAATGAAGAGCGCGAGGGCAAGAAG
CAGCGCCACCCGCACGGTCATGACCGAAGGGCACGCCGACTTCCATAACG
CACTCTTTGAATAGATATAATGAAGAAGAATATATTGGATCAATGGAATC
AATTTGCGAGTCAGAATCTCGCGGCGCATCTTGTTGTAATTTGCGCCAAA
AGGCCCAGCACCAGTCGAGCACCTCTTGCATGGTCACATCAGCGTAGGGC
GACATGGAACCGATCCGCGCTTTCCACTTGATGTTCTTGCCGGTCTTGAC
CCGAACACGCTGCCGATGTTCGGCTCGAAGAATGTGGTGTTCAGGTTGTG
TGTGCGGACTCTTTGCCGGCTGGGCTTACTCCGCAAACCTCTCGCACTAC
CGCGTGATCAGCGGAATCCTGTTGATCGTGCTGGGCCTGATCATATTCCT
CCATTTCTTTTTGTGTTATCAGCTACTCTACTATCAATAATGATTAATTT
GGAGAATCTTGTGTCCTTCAGATCGTCCGATGATTCCGCATCTCGTGAGC
ATGTTGGCGATGCAGATAAGCTTGCGGAGATTGCTGAAGCGAATTGCCCT
TACGATCGACAAGATCATGGAGCAGGCACAAGTCTTCGCAAGTGCATGGT
CAGGCCGTTATCAACTGCTTGCCAGATATTTCGACGCATAACAAGAAACT
ACCGACTCCTACCCATCATTCCTGACGCCGCACCCCTGGAATGTCATATC
AGAACCGCATAAGTACAAAAGATACTGAGCTTTTCAGCATTTGTCTCAAG
TGAATATGTCGCCCCAATAGAGTTGTTAAATGTTAGACGCAACTCAGCGA
AAGCAAATTTTGATTGAGGCGCGCATCGTCGAAGCGGATCACCGCTTTGC
TGTTCCGCAATTCGCTGTCGTTCGGCCTGAACTTGAGCTAACTGCTTTTC
CACCCACAGGTGCCCCGGCTGGTAGGTGATGAAATCGTGCTGCAGCAGCT
GGGAGGAATGAGAGCGGAGCACTCAAAGCAGCAGCACCTCCCCGCTCGTG
TGCAGCAGCTTGAGGAGCGTCGTTTTACCCACGCCATTCTCACCAATAAT
CCTGCAGGCGTTCGTCGACCAGTTCTACAAGCTGCTGTTCTGCGGCGCCG
CGATGATTATTAGGTTGGTGATAGCGGTGAAGAAGAAAGCCCCAGTCTGG
GTGCTGCAATTTTCCAGGGCCGATGTGCGATTGACCGGTGTGCCGCCGAC
TGCTTTCTGCAAATGCCCAAATAGTAGCAACATCTGCCCAACTTTCAGAA
GCATTCAAACTTATCCTTTCACCAGCATAATCTTGAATCTTCGTCATAAG
CCTTGATAACATTTCTTTGCCAGCGTTGCAATTAAGAATAACCCATGGCG
GGGAGGAATGAGAGCGGAGCACTCAAAGCAGCAGCACCTCCCCGCTCGTG
TGCCTGATGTTGATAATGTAATATATAATCTTCAATAAATATAGGATTAT

## Sheet: sequence length 51-100
TTCCGGCTTTCAGCGGGACATCATGAGCCCTCANNCGCGGCGAAGCCGGCG
CGTCGATCTGCCCCCCTGCCTGAACACACGGACAGACGGATACCACGGAGT
CATTGCCGATTATCGCCGCCATTGGCGGTATGGTTGTCCCGGCGCTGCTGC
CGTGGAGGTCACCAATATCAGCGGCCCTTACACGGTGAACGCCGAGCAATG
CGTCTTGGATTATGGTGCAAGCCCGTCAGCATCTGCTGCTGTAAACACCGC
CAGTCTGTCCGACTCAGTCCCGTACTGAATAATGTGGTTCAGCATAGTGCT
GAGACCATGTAGCCGCATCAGCAGGGTCTGTTCCGCTATAGACTGCAATCT
AAAGTAAAGTCTGATGGTGGAGCTACAAGAGGAGATATGCACGTTTTGCTT
TGTTTCGCTTCTTTCCGCAGCTGTACCAGTGCTGGTTCTCAGATATTACTT
TGAAGCGCTTAGCCCTTCCACCACGCCGGATAGCGGCCAGTTGCGTGTCAT
ATTCGCGCCCGTGTTGTTTGCTGCGGTATCGCCGGGAAGTGATGCGGGCAT
GGAACCTGCAGCAGATTTTGATTGAAGTGTCGCACCGTCGATGGAGATTTT
TATACGGCCATCCATGGCCGTTGTCAACATCTAAATCACTTCAATATGGTC
TACCGTTGTCAAATCGCTGTACATTCGCGCACCACTGCCACAATCTCCGTT
GCCATCGCTTTTCAATTGTGGACCGTCTGGCTGTGGCGCACCGCCCTGCGG
AATCTCCGGAGCACCTGTAGCTGAGTTTAGTGCAATCTTGCTCTTGCGATG
AACACCAACTCCATCGCAATGAATGTCCGGAACCGTGCCGAATCGAGAATT
GGCGTGGCCGAAATGACGATCTTGGCGTACGGCGCGATCAGGTGCACGGCG
GGCAATTGTCCGCTGCTGGCGGATCACCATCTTGCAGAAGGTCTCGGTCGT
GATTTCATTCAGCTTCATGTGGCACTCGGTTGAGACTTTCGGCAACGGTTT
GCTGTCACATACAATAAATTTTAGAAACTCTACACCATATCCATAATAAGG
GATGAAGCCGGTGTCCCTGCACGACCTGGCGCCGGTTATCCGCGCTGCGCT
TGGTCGAGGTCTTCTCCACGACATTCCGCAGTCCCATGCGCGAGGCCGAAT
CACGCCGAGTCGCGTCTGCGTCGCGACCCGCGCGCTCGTCGCGGCGGGCGT
TATGGACTCTGGACTTTGGGCAGGACAATTAAGTTATGGAACTCATGGAGG
TGACCGCTGTCATGCAGGCCTGCGCGGTCTGCATGGCCTTCAACCTCACCG
CCCTTAGATAATATGATAATAAATTTGTACATCATAAACTATAATCAAATT
AAGATGAAGGAAATTTATTACGTAGAGGATAACGATGCGGCTGGCAGGCTT
GAGGTAATCTCCTCTATCAGGTCACTACAAATACCTGAATATGAGATTTTG
CCTCACCCAGCGACCTGACTTGCCCATTTGCTGCGCTATTTCTTCTACTGT
AAATGGCCAGGCTGGCCAATCTCGAACGCGCCCAACTGCTTGCCGAATCTT
TACCGAAATTGCCCATGTTGATAGCTCTGTTCAGCTCAATCTAGCTCTGGC
CGAAACAGAAGAAGATGCAGTCACAATGAAACGAGATGTTAAAACATGTGC
GCCTACCTCCAAGCTATACTGACACTCGCAGCAGGCATCCTTATGATCGCG
CATTCCCCGGCGACCTGCGAATGCGACGACGAATTTTACCCAGCTTGATCT
GAACTTCAACCACATATCTCATACGATAACTGTTGTATACATTCTAACCAA
GGTGTGTGGGGGCGATCGTGATGGCGAGCGAGGTGCCGGGGGCGTGGGATG
CAGTCGTGTAATTTGGCCGCTGCTAGTCTTGTCTTGATCAGTTTCTTTTGC
CACAACCAAGACGCTTCTCAATATGATTGCCCGTGCGAACAGGAAAACCAG
GACGCTGGATATCACGTGCCTGCAACCCAATTCGGCGGCAATCTCGAGGGC
CGGAAGGGTACAGCCTGCGACAGCTTCGTCCTTATGCTCTGCCTGAACCCG
GGCGAGGAACAGTATCCAGATGGCCATCAAGCCGCTCGCCGGTAGCGATTT
CGTTTCTTCAACACCAAACACTTTATCAATCGCTTTCGATACAGCGCTTTC
CTCTTCGTCCCGTTGATGGATATGTACGGATTTGATTGGGAGAAGGGCGAC
TACTTTTGCTCTCATCATTGCTAACGCTTCCGCATTTTACCGCCCATATAC
CATCACCGAGCCGCGCTCGGCGCCCAGCGCCATCCGGATCCCGATCTCGCG
CAATGCCATTTCTGGATGATTAATAAAAGGTTCTTTTGCTGTATCTTCATT
AATCCCCTGCCCTGCATTTCACCCTTGAGCGCATGCAAAAGATTTGTTTTT
GCCTTCAGCGCAGACGCGTCGATCTCTTCGCCTTCGTGGATGTCGATCGCG
CTGGAATAATTAAGCCATCTGGGATGAGGGCAAATCTGCATTTGCCATATT
CTTCGAGAGCGCGGAAGAAGTCTGGATTCATGGTGGTGCTGGTTGTCGCGG
CACATCTTCGGCCGACTCGCAGCGCCGCATTGCCAGTCCATAAACGTCACG
CACATCCAGCCTGCCTGTTATAAGCCTTTTTAGCTTCCGAAGGTCTATTCT
GCATTGCGCTTGGACAGCACCATCTAGGGCCGGTGACGGGAGCCTCCACCG
ACTGCTGCGGTAGGTGTTGGTATCATTAATACGCTACCTGAGATAGACGGT
CAGTTGTCATTAAAGCTCTCATGAAAAAAGACATCTCCACCAAGATTTGGG
CAGCTTAACACTTTCCCATCGTTTTCTCGTTCGTTCTGATAACAGGCATGT
ATGCGCTCGACGTGGTCTTCGGGATCAACCAGCACGACTACAATCAGAACC
TAGATGATCCTCTAAAGATTAATCGACTTCGTGTACGATGCATCGGCTTTC
GGTCTCACTCTCAATCCGGCCCCAGCCAAGGCGGTCGTGTACTGCACATAC
ATCAAGCACGACATAGACCTAACGGACTGGGGAACTTTGAGTGCTATTGGA
CGTCTCTGTTCCAGTTAAACGCTTTTCTTCTAAGTCTGCAATCTTACCATC
TTGTGTTTGACGTTGTGTATGAGTGTCACTTGACACTTTGTGCACGTTTTC
AAGATGTTAAAGCTGCTGTGTCCATCTGAAGAAAACCCTCTGCACTCATAG
GGCACCACCAGAACAAGACATCGAAGCAATTTTATACAGGAATAGAAAATG
TAGCCTTCGCCCACCGATATTGAATAACGCATCTACTTGTTCCTGTGTTGC
TCATTTAGGTCATGCAGCAGGTGCATTTTACAACTCAGGATTCGATACAGC
CAGGTGGAACCTTGATGGTGGTCGACACCAAGACGAAAAAGGGCCTGCAGC
TCCAATACAGCATTAGACGTTTTGAAATCGTCCTTATCATCCTTGAAAGCC
GGTCGGTGGTCAGATCAAGATCCTCTGCCGGATCGCCGGGCAGGACCCGCT
AAACCCTTATGCCCAAATAATCAGCGATTGAAGTATGAGAATCGGTTGATT
TGGAATCCGAGCGATTAAGTGAAAGCTCGGCCGTAGTCCAAGCAATTAATG
TAGCGCAGTTCATAAAGCTCGCCCTGAGGTAGATTGCGTGATTCATACACA
GTAGGCGACAACATTGCCGACGTGAACACTGTTGCAGATAACGACGCAAAC
TATCGATTAATGGGAATGGAATATAAGAAATGTTAGCCTATGTATATTCAC
TACTGGGGCGACGACGAGTGCTGCCTGGTTACTGAGATTGTCGAATATCCG
GAGAGTTGCGTCATCTTGGTGAACTCTGGTATAGATCCGCGCCGCAAGTAG
TCCATAACACTAATTCCGTGTGCATATTGCGCGTCATAAATGGCGTTATAT
CAGACCAGCCCGTCACTATTGGGACTGGCGGATAGGACACATCCTGCCCGG
CCCAAGAAATAAGCACTGAATGCAGAAAGACTCACACTTGACACTAGTTCT
AAGAAATTAGTGTGATTGGGTATATGTGTGATGCATCAGAGGGCAAAAATT
GTCTACGCCTTTCCATAAATCCTGTTCAACGATTGTGCGAACATATTCTAC
TATGAAGATTCCGCGTTGCCAATTGGGCACCAGCAGACGATCTCTCAGCCC
CATCGATAATTTTTGTTCCTCGCCATCGCATAAGCGGCGATCACGAACTAT
TCAGGAACGGCTACAACAGTAGAGTCGCTAGACAAAGTGGCTTGTGGCACT
ATCGACACAGCCGTCGCGACTCACCAGCGCGCCGGTTTGTGTGTCACTAAG
GCAGGTTTTCAGCGACAGCCTGGTCACTGGTGGTGAGGGTGCCAAATACAT
CACTTTCTCGCCGGCGGCCGAGCGGACGACTACGGCGCCTGCCTTGCCGTC
ATGGCCATGCCTCTAGGATGTTGACTAGTTGGGCTACCGACGCCGCCCTTT
GGTTCGATCAGTTTATCGCTAGATTTTCCATCAGATTCCGGTTCATTTGCG
ACAATTCTTGTGGCAGCACACAAGTATCTGGGCGCACAAGAAATCATGCAG
TAGGGCAAAACATCGAGGTCAAGTGGACTAAGCACTCTAACGGTCCATCTC
GCAAAAAGACACCATTCAACATTGCAAAAAATCTGAACAATTGTAACTCAT
CGAGGCGACGGCGCTGTAGGCCTTGTCCCAAGCAGACGCGGAGGAGTTGGC
GTGGATCCCGGCGCGATCGAGAATGCGGGCGGCAGCTTCAGCGCCGGTGAT
AGTCGGCTTAATGGCTATCGCCCGCCGGAAATATTCCATTGCCTGGGTCAT
CGCTTGCTGGGGCGGATGGTTTCTAGTAACAGGATGTGTTCAGCCGTATAA
CTCGTCGATGCTGCCCTCGCTGCCCTGCTTGTTCACCTTGGCCTGGCGGGC
TGCAGAATTATCGGCTGGCACTTACAAAGATTTTTTTACTAGTCTGTATTG
TTCCATCAACAATCACCACTTCCAGAAAATCATGCACTTCCCAGCCAAAAG
GAGGAAAAGGAAGATCTGGGTGACCTTGACGAGGAGTGCGAGCGTCTGTTC
TATGATGACCAACTACTACACACCGTTGGTCTTTGTGGTTATCTAATACAT
CACAGCAGCAACAATAGCCGCAATGGCAATCTTCTGATTGGTGTTCATGTC
ATTATGTGCTGCCGGAAGTGCGGAAACCGCATCGAAATATGTTTCATCGTT
CACATTAGCAGCATAGTGCTTATAAAGACGAATAATAATAATTCGATATAT
ACGCGGGCGCAGAAGTTAAGGGCCAGCCGCACTACAAGCCAGTCCGCCACG
TACAATACAAATTCACAATCGAGGAGAGAAGAGAGTATGTTAGGTCGCAAT
TTGAGTTAATGATCAATTTACAACAGAAGAAATAGCTAGATATATTAAAGTA
ATCAGCGTAGACATCAACAGCCTGCGCAACTTCCGTGGAGATCGGTGACTTC
CCAGGGAAATGGTCTTAGCAATAATCTGTTTGGGAGATTCCGTGGCGAGCGA
CTTACCACCACCGATTTTGATTTGCGCGTCAGCTGCGCCTTGTTTGTAAATT
GAGACTCATTACCCGCCAATGTCTCGATGAATGTTCTGGCGTGGGCAGGGAC
CGTATACCCCATGCAAATCTGCCCACTCGATCAACGACCGCATTAAGAACGG
ATGTATATACGTATATGTATAATGAGTCCTTAGATTAATAATAGTATGTGAT
GATGAATGTGAATGGGAAGATCGGGGAGAAGTTAACCATGGCTGTACAGTAC
AGAGAAAGAGAGATAGAAAAAAGAGAGAGAGAGAAAGAGAGAAGAGAGAGAG
GATCACCCACGCCTGAACCTGGACGCACACGGCAAGGCGCTCCACATGTTCG
TGCAAAGGCAGCAAATATTGGTTTGCTGTTCAATGCACCGAATCTGTCAAAT
GGCGACGCCGTGATAGGCGCGGTGGCGGCTCACCTTGACGCCGATCGCGGCG
AATCGTTTTATGTTCAGTGTACTCTGCTAAGTCAGCTGCGTTAATATCAATT
GAAGCCAACTTAGCAACAGACACGCACTACTACGACAGACATTTTGCAAAGT
GGCTATTCAAGCACCAGCAAGGTAGGCACGGTAGCATGCATGGGCACAGACT
AGCGTTATCTCTTGCTGCTGGGCTACCTTGATACCATGCAGCAAGGCTATGT
AAACCATCCGCTCATCCGCGCAGATTCTGCTGCAGATCGTGAACGACCTGCT
TGCGTGTGGTCTGACAGCGCCAAGATGACGCCGGAAGAAACAGACCGGATCT
GTGAAGCAATGCGTTACCTGAACCCAATGCTGTGTTAGCAGCAAGAGAGGAT
GATGCGCTACGTCACGCGCTGGATCAGTTCCGTCAACACCCAGTTCAACCCG
TGAAGTCTAACAGGCTCTCTTCCATCGTAGGAAGATGACGAGCATACTTCAA
AGAGAATTTAATAACCTTAACACTTGTCTGCGCACTCTGCGCAATGATTTAT
GATGAACGAGAGAACCAGATCCATCAGTTCGGGAGTGATGTTGGAAGTGATG
TATACATGTGTATATAAGAGTGTTCGACACCGGATAGCTGGCTTTACAGGTC
CCAAGCATAAGATGGAACCTGTCACATACATCATGGTAAATGACTTTGAGTT
CATTGTCGTCAGCGGCGCGAACATCATCCTCAGCGGCACCAACAACGTCGGC
TTTCCAAACCTTTTGACATCAGCTCCTGATGAATACTTAAACTGGCTATTTG
GCACGGTTGCTAGTAGGTGCTATCCTTGCGCACAGCCCATTGGAAAGGGCGC
TAAAACGTGGCAATCAAGCCGCCGATCAACTAGAGGGAGCTGTCTACCGTGG
GATGAATGTGAATGGGAAGATCGGGGAGAAGTTAACCATGGCTGTACAGTAC
CAATCATAAGTTGCATAAATATCCCATCATGGGGACACAAAAAGCATTTAGC
AGTTCCAGCGAGTACGGCAAGGCAAGAGTAGTAGTACGTTTTGAGCCTGGCG
CCCAATTTTGTCGCACAAGCGTAACTCATTCCCATTGCCTAAAATATCGATT
CACAACATGGCTACTTCATCAACGCTGGGTATCCGCCCATTAATTCGGTACG
TGTTTTTGGAATATTGTCTATAAGAAAATTCATAAGTTGAATCAGAAGAATC
TACTATGACTGGACGCCAGATTCAATGCTGGAGATTACTCTCCCAGCACCAG
AAATGCGAAATGCAAAACGATCCAGTCAACAATCCTAAACATTATACAACAC
TTGTTTTTCTCTTCGATATCCATCTCTCTTGACTCCTCTTCTGCTTTTATTG
CCGATGATGGATCCCATGACAAAACCGTCCGACAAATGTCCTGACGGTTTTC
TAGCCGAAACTGATGATCCGCCCGCAGACCAGATTTGATCTAGCCCGCCCTC
ACCGCCACTCGTCAATGACAGACACTATCAGTACATTGGTGAGCAGCTAGTT
CAGCTACCTACAGCTTTATCCGCAGACGTAACTTGTAACCGCAGTCACAATT
GATGCGCTACGTCACGCGCTGGATCAGTTCCGTCAACACCCAGTTCAACCCG
GCGGATTGACAGCGTACACATTCGGCAGGTTAATGATGGTTCCGCGAGTCAG
CAGGTCTGCCCGGCGAATCCCGGACTGTTGACCACCGCGCTGGGATCCGCCT
CAAACAATAAAATCACATCTACACAACCAAACATATAAAACATTCAAACTAT
TCATTGTGGGAGTCATTGGATATGCTGGAATGTGGGGTTGGGGGAAGTTTTC
CGACGCCCTCGGCCCGGTGTTCGACGCACTCGCCACCATCGGCGGCGTCGCC
TTCATGGTGGCTGGCCCCGCTCGCGCACGCACACGGCCGTGCGCCACGCAGG
ACCGGAAGGCCATAATGAATAAGACAGGCTGCGAAACATTCGCCGAGCTTGT
GCATGCCGCCGTAGATCTTCTTGCGGATCTTCCGGCCCTTCTGGTAGCGGCT
GAGGCCAGCTTATTGACGTACGTGAGCCTGATGAATATGCGGCTGGTCACGC
GTTTGTCCAGGTTGCAGGAGCTGAGGCATCGGTTCTCCAGCGGCTGTAAGGG
GATGGCGCACTTTCTGCAGGCACTGCTGCTTTGTTATCTCCTTATTTAGATG
AGCCCTCGCCACCGCCATCGCCACCGCCATCGCCAAAGCCATCGCCAAAGCC
GAAAACAGTCAAATCCTCGTAAAGTGAGAATTTTTGGCTCATCTGAGACACG
ATCTTTCGATATAGGCAGCAGCATTATACATTGGAGTCACTACTACTATGCG
AACACGCGGCAATGTTGAAGAGCACGCACGCCTCTCAAGTCGAAGCTGTAGC
TAGTTTTATATGATGATGGTGATGAAGCTGGTTGTAAATCTAACGGTAATGC
TGCCGGCTGCATGCTGGCGCTCGAAAAGAATGCCGACGTCCTGATCGTCGAC
CAACTAATGTCTGAAGTTCTGCTGGTACAGGAATATTTGCTTTTGCAAGATC
GACAATACGATCCCCGAGGACGAGAAGGGGCGCAGGCTTGCCATCGTGCAGG
TGCTGCAAGATGAGTTGAGTCAAGAATTCGCCAGGGCGCTACGGAAAACTGC
CGGCCAAGTATGCCAGAACTGCGGCCATTGCGAAGAGCACCAAGTTCAGTAG
TATATTTTATGATAGGACTTTCACCTATCTCGATTTATCCACATCGTGAAAG
CATGTTTAGCACGGGATGATCAGGCTGCGGCACTGACATCCAACCAAGTGTT
GCGCACTTCCTCTACATGTTCTGCAGACCTCCTGCGCACTTCACACAGGAAG
CGCGCGCGCAGAATCTCCGCAATCGGCAGTGGCGCGATGAGGCCGGCACTTT
GAAGATGTTGCTGTATGTCTATCTGAACGGCGCATTGCAGGAGGTCCGGGCG
GTAGATCACAGTATTTGCAGTTGATTTGCACCAAAATGCAATTTATAAACTC
CCATCGCCAGCGCGGCGACGCGCGTGGCAAACCGTAGGGCGCCGCGGTGTCG
CCGCCGATCGCTTGACCCGCACCTCGGTGTGGCTCGACGACATCGGTGGGAT
GCAGGCGGGCCGGGTAGCCGACTTCCTCGAGCTGGGTGAGCTGATGTGCCGC
TGTTCACCGCGGCGGCATGTTCGAGCCGGGCTCCCACGAGTTCATACGATTT
AGTTTCGGCAATTCTGCGAAATTGGCAGCATCAACCGCGCCGATGTTTGTCC
TATCCATCTAAAGCAACTGTAATTAGTTCAATATCGCCTGATACTAATTCTC
GCGGCAGCTTGCCCTTCTTGCGGATCGGGATGAAGCCCGCCGACACCTGATG
AGTGCCAGCTTCACGCTCATTCTTTGAAATAGCTTGCATACGACCACTAGCG
CATCCACATCGCGGCACCTGGCCTGGCCTTGACGCCTGGGCAGTCGCGATCC
AAATGGTCCTGCGTAGGCATAGCGTTGCAACACAATCAACTTGGGATCCTGT
GAAGATGTTAGATACTTTTTGCACGCTGACCTTGCCCAGAAGCATGACAAGT
GGGGACAGCGCCGAGGACACCGCGCAGCCGCTCACGCGTCGCCGCGTGCGCG
TCCGTCCATGCCTTCCAGCGTTATGAATTTACCGCGCTTCATTTTCTTGCCT
TACATGGATGAATTCGACAAGCAGGCACAGGAACTCTTTGCTCGTGAGATCG
TGTTTTATGTCTTGACATTACATGACCTTAATGTTACAATAGTATTTGACGT
AACGCTTCGCAGAAGAAAGCGGAGGCAATGTAGCAAAGACCAAACTTCGACG
ATTCTCTTGTGGAGATGATCTTGAATGGGAAAGAGTGCGCACTTTTATTGGC
GGAGTACGAGCGCGTGCGCGGGCTGCGCGAGCAGCAGTTACAGTTCGTGGCG
CTAGCTCTCTGTGGTTCTACTGCTCTATTGTTTTGTAAGTAGTTCCATTTTA
GGGTTATAGCTCTACTAAGATCGGATTGCTGGTTAGACGTAGCCGCCTGCAT
AGGGATGATATCCCCAATTACGTAGCTGAGGGGGAAGAGGAACATTGCGCTT
TCCAGCGCAGTTCGTACCGCATCTAATCCGTCTGCGCAGTGAACATCTCAAT
GAGGCCAGCTTATTGACGTACGTGAGCCTGATGAATATGCGGCTGGTCACGC
GCAAGCGATTCAAGATATAGCAAAGGCTGGTGGAGCAAAACAATTACTTTTG
CAAAGCAAAGCCGGTGAAAAAGCTATTCGTTCGTGTCGAGCCAGTCGCCGCT
GCTGGACCCTAACGCAAAGATACCAACCGTGCTGTTACCAGCAGCAGAACCA
CTGGTAATGGGGTGGGTCGCATTGCCATTACGTCGCTACTATTAATTCGGCA
TATCGAAATCAACGCACACCAGAAGGCGTATGCGCTGGACGACAACTTACGT
AGGCACGACGGATAGAATTGCAGGCTGCTTGGCACGATGATTTTGGCCGAGG
AGAGCGCCTGCTTTACAAGCAGGATGTCGGCGGTTCGAGCCCGTCAGCCCCC
CATGCAGTTCTACAGCAATAAGGTCCAGGAAATTGTCGAACTGGAAGACGGC
CGGTAACGTCGGTATCGGGACAGGCAGCCCCGGTTCCATGCTGCATGTTGCG
AGTCATGTCAATGCTGATATTTATATTAGCATAGAACGCATTAAAGAAAATT
CATAAGCATAAGCGAATGAAAAGCAAATAACAAAAACAGCGATAGTTCCGAT
GATACTAATGCGGCGATGGCCCAGGTCATGCGGGCCTGGGAAGCGCTCGACG
GTTAATGATGTTAGAGTTGATTTTGTATATAGTGGCACAACTTGGCAAGTAT
TGACTGCGTAGGTTATTAGCAATTTGATCATCAGCTAATGCACCCTGCGCTG
CCTGAAGCTGCTGGGCGGGATGTCGAAGTTCGTCGTCGACACCGGTGACATG
TGTAGTGATGTGATCCATGATAGTCTCCTACTAATAGCCGACTAATACCCAA
CCTGGGTCTGGTGTGTAACTCATGCTTGTAGACTGGCGTCAGATAATCAGAC
GGGTGATGGAATTCCACGGAACAACGATTGAAGCGATGACCATGGAGTCACG
CCGGTATCGGCGGGCGACTCTGGTCAGAACAGCGCAACCCCGGCCTGATGGC
ACTGCAATAGAGCCACCGCCCTTGTGTTTTGACTATTAGCCAAGGTTTTGCT
TCACAGTCTTGCGACGACCACAGGTCAGCGATGTTGTTGATGACGATCCAAG
CGGGTAAAACCACGCCGCCACGCCACCGCGCGCGACGCCCATCTGCGCAATC
AGTACCTTGTTGTGTTGTTCTGTGATAGCCGCTTGACCACCAGGACTATTAA
GCCAGGAGACATAAGCTGCTGCCACAGCCACACGCGCGACGCGCAATTTCGC
GAGAATCATTGACAGTTGTCGGCGACGGATTGCAACGCAGAGATTTGTGCAT
GAGGCGTCGGAGGCGGCGATGCTGCGCACCCGCGAGACGGGCAGCCCGCTCG
CAGATCAATATCGCCTTCATCCGGTCGGTACGTCTGGCACCATCGGCCCCGG
TGGTTCCGCAAGCATGAGGGCGCCTCTGGCTACCCGTACTTCATGGATGTTC
CTGATCCGCGCAGCACGCACCAACACCAGCCGCGCCAACCTGATGATCTACG
GGAGTACGAGCGCGTGCGCGGGCTGCGCGAGCAGCAGTTACAGTTCGTGGCG
GGATCACCGCGGCGATAGGACTGACGGAATATCTTGCCGTCACGGCGAATTT
CGTAGATCGCATCAGCAAGCCATTTACGCGGATGACCTTCGTTTACGGTTAA
CTTCGCGCTGTTCCAGTGGGAGATGGGGCGTGGCACGGCGCTGGCCGAGGCG
TTAATACTGATATCCATAATCATAAAACCATTACACAAGAAAATATTAGTGA
CAATCTGATAAACCTCTCTCTATTCCGTCGATGATCATAGAAGTTTAATTTT
CATCAACGACGGACTCGCCCAGCGCGCAGCAGGACGCGTACGTGCCTTCACT
CATGATTGGAACTGAAGATGGCAATACCAACACATTGGCTTCTGAGTTGATC
ACCACCTTGGCCGGTTCGGGCAGCATCTTGGTTGATGAGCGCGAGTCGATCG
TGCATGGTGGACTTTGTGAGGAATAGTTGAAGTAGGTGATACGACGCAAGTA
TGATTGTGTATTGAGCGTAGTCGCGGATCTTTAAAGCAGACCCAGCGCGGTC
GAAGGAAGAACGAACGGATATACGCGCTGGCCGCGATCTCCGCGCAGGCCTT
CACCAGGCCAGCCGTGCGACGCCCGTTGGCTCCGGGTCACCCGCAGGCGTGGC
CCTGATAAACTCTACACATTCTACAGCTTGTTTTAACAGAAACAAATGCTCGT
CTTTTCCACAAAACTTGCATTGCATTCCAGGGTCCGCATCAGTCCTAAAAAAT
GATGACTACGGAGTGCTTACTATTCCTGCTGACAATGGCACAGCCTTAACGGG
TGATGAATCGTGACCTGGGTAAAGGTATTTCCAACGGTGCTCATTGCAAACAT
CTGGATTTCCTCGATGGAGTACTAGCAGAAGGAGGACCTTGGATAGGTACCCC
GGTCAGGCAAGTGGTTTGCGAGTGCCTACGCCGTGCGCCAAACGTGCAGCACG
ACCGGACCTGATTGCTGCAATAGCTGAAGGACTAATACCGATCAATTTGGCAT
GCTCGACCCTGCGACCTGCGACCCTATCTCCCGGCACCAGCGACAACCGGGTG
CATTTATGTGGGAAGGCGGTGTTGCAAACGGAAGCCGAAGCCACTTCTATAAG
CACGTATGGAACTATTGTACGCACCTTACGCACCGAACCATTACGAAAACATG
GCGTTGTTGAAGTCGGTTCAGGCTGAGCTGTGAAGATTGGTGCTCTGTTCGCT
GAATCTCTTATTTCTGGTATCTTTGCTTGTTCAACACTCAACACTCGAATCTG
TGATTTGTGTCTGTCCAGAAGAGCTACTATGTTGTTGTTGTGAATATGAAGAT
TATCTTTCTTAATGATGGAAGTATTTCAGAAATATGTAGTTGCAACGAACTCG
GCAGGAACTGGCCGACGCTCACGAGCGCGCCAAGGGTGCTGCTGCTAGTGGTG
TGTCGCCAAGCGGACAGACATTACATATTTTTCAGCAATTGCCTTTTTGGATG
CCATCAAACGTAACGGATCAGTATGGCGCTACGTATAGTCCTGAAAACTTATT
CTGCATATAGGGTTCACAGGCGACTCCGTAGTTATAGGGGGAGAATTTGCCCG
AAGGGCTTGGAGCCAGGTGTCGATCATGGGGTCTGTGCAGGAAATTCCTGCAC
CGTGGAGTGGACTCTCAGCCAGACCTCGCGCGAGCCCGGTTTCACCATGAACT
TCTTGATGGGACAATTTGTTGGACAGACACCGATTGGCGATTATCTGGACCTT
GGACGCGGGCGCGTGTTCAGGGGAGATGGGGTGTGGCGCACCGCGTGCGGCTG
CAAGGTCGAGATGGATGCCTCCATCATGGATGGACAGAAGCTTGCCGCCGGGC
TAAGGCGAATCTTTGATTGGATTGTGTACTTGACACCAGGAACAGTTGTAATT
CTGTATCCGCACCTGCGCCTGCATCTGACGCTATCCCTTCACGTAGCCTTGCG
TGGAGCAAAAACAAAGCAGACAGAAGCCGCAAAGGGCTTCCATAGACCGCAAG
ACTCGAATCTCTCTCCCTTCGCCCGATTCTGACGATACCAATCCGTTTAAGAT
GCGCGCGCCGGCCGCCTCCGCCCGCGCCAGCGCCCGGTCGAGATCGTCGACCG
GGCATGTATACTAAAGAGCTTATTATCGTATTGTCGCGAAGCTTTGTAAAATG
TGTGGTCCGAGTCGGCCTTCGACGCGACCGCCACGAGGATCATGCCCCCGCCG
CCTCCTCTCCGGCCGCCAGGCCATGGTCGACGACGCCCGCAAGCTCGGCGACG
TGCGAAATGGCGATGGTAATGATTAACGGAGCAAGGGTTTACAGCCGTCAGTT
CGACGCGCCATTCCCACACGGCAAGGAGTTTGTCGAGTTCATCCATTTCATCC
GGGCTCCCTCGTCGATTCCATTACTGCCGTGGTAAGCGACTCTTTGCAGGCGG
CCAAGTTCAGGCCGGTCGCCAGCGCCTCCTCCTCGGTCACCGCCCCACACGCG
GGCCGCCTACCATAGCCTCTTGAGCGGACGGTTCCAGCACTGCCCTCCAGCCG
TGAGCGTGGGCGTGGGCGTGAGCGTGGGCGGCACGCGGGTGGCGGTTTGCGTG
GGAGAGAGAGAGAGAGAGAGAGAAGAGACAGAGAGAGAGAGAGAGAGAGAGAG
GAGCTAATACCGCCCAAAAGTGTGGTCTGCTACCGTCTGAGCTACTTCGGCAG
GTCCGCACTGGCATTGATCGGCTGCGGCAGCGAGTGATGCTTGATGACAATCT
AATCCGAACGCGCCGTAATCGAGCAAGCAAGACAAGAGAGGGATCAGTACCAG
CGCCAACTGCAGCAGCAGGTTGTTCACGAGCTTTACGACGTACTTTGGAATAC
GAATCTGTTATGTAGGCAACCATTTTGCGGACAGAAACGGAGTAATGAAACTG
CGGACAGTTCCGACAAGCCTCTCCAGGCAACAATATTGTGCCATTCAGTACTG
AGAAGGCGCGGCGTGTCTCAGTCAGAGATAGACGCCATTACCCAAGAATTATG
GCTGAAAATCTGCGGCTCCGACCAGATGATGCGGCTTTACGGGCTGACGGGCG
ACTATACGATTGGCATAAAGAAAACAAAATATCCACATCTACATAAACAACAC
CTGCTCGAAGAGGTTAAGTCGCGCCAATTCGTTCAGGCCTTCGGGCTTGATCG
GGGGGACCTCTGGGCGGCACACGCGGATGCGACCTCGAGGGTGGCAGTGCTGG
TGTTCTGGATGGACCTTCGACACGAGTTCGCTCATTTTATGCCAAGGCACACA
TCAAGGGCAAGGACAAGTCTCTATCGGTTGTGGTACTGCTGCCGTCGAATTCG
GGCAGATAATGGTAAAGCAGTTGAAGAACAGATATAATGATCCTTCAACAAAT
CGCTGGCCGAGGACCTGAAGCTGTCGCTGCCGGGGTTCCTGCCGTCGGCGCCG
GCTGACAAGGTCAGTACTAGTTTTAGGTCGGTATAGGTAGCAGGTATAGAGCT
GATGAAAAACATGTGCAAAGCAGAAGCAGCAAACCCGTCGGACCGTGCGCAGG
AGCGACTTTTCTGGCTTGCTGAAGTCTCATCCACATTTCATCTATAGTGGATT
AAGGGGAACTGCTCGATCCGAACGGCCTGGGAGGGCACGAGTCCTCGCTGCAC
TCAAGGGCAAGGACAAGTCTCTATCGGTTGTGGTACTGCTGCCGTCGAATTCG
GCAACTGCAACAGCTCAGCCAAATATAAAGTATATTGATAATGATAATATATA
CTTCGCCGCCTCATCCTCCCAAAAGAATCGCTCAATTGTCATTCCGAATGCAG
GTTGGAATGCAAGTTAGCCAGTTCTTGGCCTTCTGGCGTGTACTCCCATTCAG
CCGACAAAAATGGCTGCTGCTTTGAAGAATCAATCCAGGCGCAGCATCAATCG
CCTATGCACTTGGGCGATGCCGATAAATCGTATTGAATCTATTACCTAAGAAC
CATCGAGGGCGACAGCGTCGTCGACAACCTCGAGAACGAGGTCGAGTAGAAGT
ACTCCGATTGCTCAAGCTTTATCCGATGGAAAATGCAAATTGAACAAGATGTT
CTCGTCGCGGTCAGGGTGTAGGTGGTGGTGGTGGTCGGCGACACCGAGGTGCT
CATATGAAAAGTTGCACAACAGTATGGTTTTAGTTTTAGAATAAGCGTACTAT
TTGAGGTAGCCGAGGATCATCCCGCCGAGAATCACGCCCCAGATCGAGCCCAT
TGTAATTGGAATGCAACAAGAAAGAGCATTATGGGAAATGACTGCCAATGGAC
AGCCGCCGGCCATGAACGCCGCCGAGATCCGCGCCATGGCCGCCGCCGCCAAG
GTCTCTTAACCTATTTGCATTTCTAGCGGCCAGGAGCAACCTTCCTGCACTGT
AGCAGGACTGGTCTGAAGACATGGTTCGTAATCGCGAGCCCGGTACTCTTATG
CGTGTATAAGTTCCGCTGAAAACTGCTCAATGTTTTCAAATATGTTTGTGCTT
CCCTGGCCATCTATGAGGAGCAAACCTATGCCTACTCAGGCTGACAAACAGAT
GGCGGTGTCGCCGGCGCCGACATCACGCACGGCCTCCCCCGCGTGGTCGAGAT
CGTTAGCTTCTGGGCCGTTGGCGGCGTAACACATGAACAATTGTGAAGGTGAT
AATTATTAAATTTGTCTAATAGATATGAAGAAATTCAAATAGGTGTTAGCATA
TGTGTCAGTACACTGCATGCCGTCAGAGTGCATATCGATCGTTGCACCGTAGG
TACATTAGCATGTTTAAACAGATCTCAACAGAATAGTGGCGATATTAAGAGAG
CTTTCCGAACAACAGATTATACACAGACTGAGATAACCAATATTCTCGGCGAG
CATCGATCTTGGTCATGACATTTTCAATAATCTGATCAGAGCCACCACCATCG
CAGAAGCGGATCACGTTCGAGAAGATCGACGCGCTCCGTAGGCACATGCTGCT
CAGTACAATCTTGACCGTGGCGGCTACCCTGATTTTAGTCCGCGAAACAAGCA
CACTATGCCCAACCTGGCATGGTTCGGTGGTGTGCGAGTGCGACACTATCGCC
GCGCGCGCCGGCCGCCTCCGCCCGCGCCAGCGCCCGGTCGAGATCGTCGACCG
GCGGAGTGTCCAACCAGCGAGACTTCATCGAGCCTATCGAAAAGGCGTACAGC
CATTAACACTTATTGTGAGCACATTAACTAATCTGGTTTTATTACCAGCATTG
GACCCAGCTCTACCGAACAGATTGACGGTGCAAACACTAAAGATATTAGCGGC
GATTGCAGCACGTCGGGGTCCAATCCCTGCGAGGCCTTCGAAATGCCCGTCCT
GCTTAAGGGCAAGTCAGTAAGTCAGTACAACAATCATACATAATACAGATAAA
AGTGTGACGCTGGCGAGATTTGCTACGAGGGCGAGTGCCGCGCGCTAGACTGC
CCGCACCCGCCAGCAAGTCAAGCGCGCGTACGCCACCTTGACGGGCCAATAAC
AGCCCGCGATCACTCGGCAAGCTGACAAAGGCGCGAATGGTGGACTCGGTGCG
CTTCGATTTTTCCGATCTCTTTTGCCTGCAAGATAGGCGATAAACGGGCGATT
TGTACTTGAAATTGGAGCATTTATTGGGGATAATACTGAGATACTTCAGGAAC
GGTTCATTCCAGTACGACGTCATCGGTAACACCCTGGCGTCTGCTCGTGTTGT
CGGCCCAGCATGCGCCTGCCGCCGTCGCCACGTCAGGCGGCATGCTTTGTCCA
GGCGGCGAAGCGTTCAAGAGTTGCAATTCCTTCGTCGCTGGTCGTACCATAGG
GAAGGTCACGGCCGACGACCTCATCGACCGTGTTCTCGCGACCGCCCTGCATT
CGATCGGCACGACCCTGTTACCCGAATCTGCGCACGAGAGCGCAAACACACAC
GGTCTAGAATAGATCTTCTTCTTATAGGGTCTGATCTAGCTACTCGAAGTAAA
TCCACAGCATCAGGAACTATTACTTCAGTACGGAAATGGCTGGTATAGAATGC
CGTGGCATGACAAAATACGCCGGAACGGTGGTCGTGCGACTGCCGCGCAGTGT
TAGCATTAGCACATTCCTTAGTCATAGTATCGCTATTAACTCCCTCTCTTGCC
AGGTAAGGGTGGTTACTACTCAACAGACGATGCGGTGTTGAAGCAGTTAGCGG
TTACATGAGCGCCAAGCTCGAGAAGTCCACCGATGAGATGGGCAAGATGCTCT
GGGATGATATCGCCCACGTCGCGCCGACGGAGCTTGAGTATGGTCAGGTATTT
CGTGGAGTGGACTCTCAGCCAGACCTCGCGCGAGCCCGGTTTCACCATGAACT
GGCGACGCTCCTGGCGCGCGAGGTGGATCTCGACGCGATGTTGTCGATGGCGT
AGTATGTTGGATTATCAATACCCAGATTAGTGAAACAGCACGAATAATAATAT
CAACCGCATCTACGACTACGACGTCACCTTCAAGAGCCTGTCGCCTTACGTGC
GAGAGCGAAGCCCGTTCTAAATGGCTCGCAGTCTAAAGACCGCCAAGCGGGCT
TTTCGTTGGCCATGCCGACCACGGCCATCAGTTCCGCGAACATCTCGCTCGTC
GACGCGCGCAGCGGTGGCGGGGTGATGGCTGTTCTCAGCGCCGCCAACGCGAT
CAATGAATGTGTTGCAGAAATTGGTAGAATCTGGATCAACCATTTCTTCCACA
GGCGTTGTCCTAGTAATGACATAGTCGCCATTGGTCGTAAGGTGGGCCATCAT
AAGAAGATGAGGAAAATAGAAGAGTAGATGATTAAGGCGAAAACAGTGAAAAT
AGAGAGCTTGGGTGACCGAAATCAGTCAAGTAGTCCCATACGGAATCCTACGG
GGTAGATGCCGGAATCTTGGCAGATGACAACACCGAGATTGTCAAAAATTATC
TTTCCACTCATCAAGAACGTCTCATTTGTCTTAATGATTGTTGGCATTATATC
GCTGGCTTCGTAACATCAAACCATCTCGGACTTTTTGGCTGATGTCATGAATA
GACTGGCACTGCCGCTGACCGACGTCCGCTCCAGTTGGGATTTGTGCGCGCTG
GAGTCACCACGCTATCAGCTGGACCAGACTGACGCAGACCTATAACGCGCTTG
TATGCATTATTTTAGCTCATACAAAATATATATACAAAATCAAATTGAATTTC
CAGGCAGGCGCGGGGCTCGTGTGGTATGACACCAGCGGCAACGCGGCCAACAT
GATGATTGCAGATGATCTTAAACAAAAGGGTTTAGCCAATCTTAATATGGAAT
CATTTTTCCAACGCTCACGAATATCATTTACTTTTTTGTAACATATCGCCAAT
TGAGGTGATGAGCGAGCTGACAAGCACGGCAGTCCGGTAAATACTGGAGGCCG
AGGTAAGGGTGGTTACTACTCAACAGACGATGCGGTGTTGAAGCAGTTAGCGG
TATTGAGGAAAATCCAAGGCATACTTCCAAGTGTGCCTTGGGTACTACTCAATT
TGTTTCTTCAGACGGAGAGAAGTAGTGTACTGTGCCATCATTCTGTGCAAAGTT
GCCTGAGCGGCAGCACCGCCGCCGGATGCGCCAGCGTGAAAGGCATGCGGTTCT
TGTCCGTGCGCGTACTTTTGCTTTATATAACTGATATGTCCGTGCGCGTACTTT
TCTGGGCGTGATGGGGTCGCGCCGGGGTCGCGCACTAGGGTCCTCACCGCTCTC
GGGTGAAATGACGCGCTTGGTGAATATGTCGGTTTTCGCCGCATTGCGGGTCGC
AGAAGCGCGAGACGCCGCGTGAAGTCGCTTTTTGCAGCCACGCCATTCTGCGTT
GATGACTGATTTAGGGCCGGTACTCAGGCGGCGAGTCTTCCACAGGACGGTGGA
CGTCGCCTTCGGACGGGAACATTCCGAAGACTTCGACGTGCGCTTGGTAGCTGT
TATTCGGGCACGATAGGTACTTATTGTATTTACACTCAGGGAAAGTTCTGTTGC
TGACGTTTCATTCTCTAGCATTTTCAGCTGCAACATTCGGGTCATGTGTTCGCG
GGTACATCAAACTCATCGGTGATCTCAACCTCGCCCTCGAGGCTTCCGGTCCAG
AACTCCGAGCCGACATTCACTGTCGCCGTGGAGTTGCCAATCGTGGACGCCACG
AACGCAAGAGAATCGGCACAACATATATTGGGCTTAGAACCTTCTGAAAGATAT
GGCGTCAGCGTGGGCGGCTGCTCGTAAATCGAACGCGATCGGCGCACTCTCTAC
CTCATAGATGCTCGTGTTGGTAATAAACACCCAGTGTTCATCATCAGAAAGACA
GCTTGAACTGCGTGAAGGGAACCGAGAGGGCCGGGGCCTGAGCGCTCAGTAAGA
GCTCGCAGCAACATTGCAAGAACAAATGGAACTCGCGATGTTGTTCAGAAAGAT
CGACCAAAATATAGAGAAATGCCTGAAAAGAGATAATCTGTAAGATAAGATAAT
ACTAAATCTATCCCTGGCTCGCGTGCTGGATTCGGTGTCGGGGCAACTATCAAT
ATGGGGAGATTGGCGGGGGCCTTGGAGACGCCGTGCTGGGCGTCGGAGCGAGCG
CTTTCGCGAGGCCCCCGACGCGAAAGCGCTTCGCGAGGCCATCGCGCAGCAGAT
TAAGATCAATTGAATATCATCAATTTCTTGTTCACGTCCGATAACAGGATCAAT
CAGTTGCAGAAACAGCAGAAGAAGCAGCATTCTCTGACACAGATCAGACATCAG
GTTTCATTAAGCGTCTACTTGATCCATAGACTCTTCCCTATAGCTTGCTCTGAC
AATATCCGCAGCGTGAGGCAAAAACAAAAGCCCCGTTATCTTATCGCCACCGTC
AGGACAGTGACGGGCGCTTTGCGTCTAACAGAGTCACGCCACAATTCGACGTGA
GTCAATTCCGCCACAATTACCGTCACTAGGCCGCCGCTATGCCTAATTATACGC
CAGAAACAGAACCCCCAGCGCCACGCGCATGTTGAACGTCATAACCTCCATCGC
GCCATTGCCGCTTCATATTCTAATGTGCTGGCAGTGGCATTTTTAACCGTGGTT
TGCGCTGCCTCCGTCTTGCCCTTCTGATCGCTGCTCTGGGCGCCACACAGGTTC
GGTGCTGGATATCAGCACCATCTGCCCATGCGTGGATCACGTCTGCGTGTTTGT
AAGGCTGGATTGTTGACATTCGAATCGCTCCACTTCCGTAGACAGGAACGCGAA
TACAAGGCGCAAGTCATCGTTTATCGTGCGCCAGGATAGCGCGCGATATTTTAT
ACCAAGTCTTGCGCAAACTCCTCATTCTCCGGATACCACACCATCCCTGACTCC
GGAGTCGAGGATGGCTTCGCCGGCGTATCGGGCGCCTTGTGAGATGGCGCGGAT
GATATGGGGGGTGTGATGAAGTCTGTGCGTGAGAAGACCGGCGGCCGTGCTGAT
TCTGTCAGATCTGTTGCAATTACTCATGGCTCGATATCCATAATTCCGACGAGT
AGATTTACTCACCTCTTGTCTTCCACTAGTGCAAGATCATCTCGATCCGATTGT
GTAATCGACTTGGAGGCATTGGAAAATAGCATGGAAAGAACAGAAATAAAAGTC
CCGGTGTCGATGAGCATCGACTTGCCGGCGGGCGAAATCATCAGCAGTGCTTTG
GAAAAGAAACTTGAATCAATGATAAAAATGCTGGTCAAGGTATTGACATTCGAG
CATGGATTAAACCTCGAAAGTGATTGAATCGCCAACAAACGGCAGAGTCTGACC
TGTTAAAAATTACGCAACGCCTGCTGGTGTTGCGTAAGAAATAGCGCCAAGCAT
GCCGAGGGGCGTTGCCGCCCGGAAGCATCTACACGATTGGTAGCGATGTAAGCG
CGATAACCACTGTCTGTCCTGATTCCCCCATCTCCTGGAGGAGAATGTCGACGG
CTCCGGTATAATCCCAAGATTGATTATACTAAAGTAGTTGTATTATATGAACCG
CCTTGTGCCTTCGCCTCTTGCTGGCAGGCAATCATAAGAACAGCTAGGCGCGAT
CCGTCCTCGAGGTCGAGCCGCTCGCCGGCGACGACTTTCTCGCGGACGCTCTCG
GGCTGCGCAAGCTCAAATTCGGCCAGTCGATCCGGGCCGACGGGCCGGAAACGC
CAGCGTACACGAACTCTGCAATCACAGTTAGGAACTTAAGCAAGGGGCCAGGAA
ACAGCATTGGTAGCAATAGTGCTGCATGAAGGATACAAAGACAACTGCTTATAT
TTTCGGAGTGTTCATTGTCTAGGCCCTAGGCGTGGCGGTGCCGCAAAGGCGGCC
AGGCCACGATTCGCTCGACACCGGCCGGTCCGGTGACTTGCAGCTTGTAGCCGG
CTTTTGTGCGTGTGTCAATGGCTCTGTGTTGCTAAATTGATTGTTAGGATTTTC
GTTCACCTCGATCGACCGCCGTTCATATTCCGAGTTAGAGTTCTCCTTGTGCCG
TGATCAGAAATACAAAGCAGATAATTGGGATAACTACTGTTCATTATTAAAATT
CATCCCTTCATAATGCCAGTCGTGATTTCCTGCAATGTATCCAAACGGAATTGC
GCATTCTTCCGGCCGGAACTGGCTAAACAGCCTTCGCAGGACTTCTTATAATCG
CCCCACCAGATAATTGTATTAGACCGCATGTAAAGTAAACACCATGCGCTGCCG
TTTGTTGTCTGATTTGATTATCTCAAATCCAGCAGGTACTTGACCAGTCGCTTT
CGCAGAAAAATGATGAACGATGTTGAAGCTATACAAGTTTCCTAAGCCCAAATT
CAGTCGCTATTGCTTTGTCGCAAGCTGGTGTTGCTAAGAAAGGTAAGAAAAATG
GCAAACTAATGCCTGTCTTTCGGACATCATACCTCTACGGGTTGAAAGATATGG
GCGAAATTGGCGGTGCGTGGTTTGTTTTTGACATGGACGACATGTTTGTTGCGC
CCTAGCCCATGCGGCTAAATGCGCGGTCTTTACAGGACATCATGTTTTGCACGT
AACGCAGCGCGACGTCGGCGGCCACGATCAGCGTGCCGCCGAGGGTGGCGAGCG
TGGGTGCGCCTCGGCACGGTCCTCTTCGGCCACCGGCCCAAGTGGAAGGTGCAG
GTAATCGACTTGGAGGCATTGGAAAATAGCATGGAAAGAACAGAAATAAAAGTC
TGCAAACGCCTTCGTCCGCATCCGCTCGATCTTCCGCAAGGCCGGAGAAAACGC
CAACACCAACGCTGCGAGTGCGCCAGTGGACGCCTTCATAGTCTGCCGTGCTTG
TCCTGCTGCCAGGGGTAGGCGATACGCCCATGGTGCGAGCTTTACCAATATGGG
TCATTCATTTTCATCATTTCCATCATGGTCATGATTACGCATCGCAGCCCGCCT
GATGATCCGGAAGTCGCCAAGCGATTGCTGCCGGCGCTGACACCTGTCTTCAAT
CGGCCGCGAACAGCGCGGTCAACGTTCCGAGGGGCCGCAGCTGGTCGTCGAGGC
TCACCGAGCCGAAGCTCGCGGCGAATGCGCTGCGCAACGCGGTGCGTGAAATGG
CAGGGCGAGGTATGCGTCGATGTGTTGCTTGACCCGGGCTTCCTCGGCCGGGTT
CGGAGATCGTCCGGTTCGACGATACCGGGCGTCACGGCAAGATCCATTTGAGGG
GGTCGTGGGCTCGATAAGCACGAGCAGGTCGCACAGCGCGTCGTACTCTTCAAC
ATTATCATTTTGTTGTGTTCTGTAATTCGTCTTGGTATCCATAACCGCCATTGT
GAAGTGCTGCGCTCCGTAATTCAGGATCGTACTGTTAACGTCTTCACCGTAGGG
AAAGCTGAAGAAATTAAACAATACCTGAGAGAAAACGGTTGACAGTGAAGATAT
TGCGAGCGATTTTCTTGCTCTCCTCATCCATCTGCACTCTCCTTCTGGGTGTTT
TGAGGTGGAAAGGCAGTGCACCAAGCGAAGTCTAGACACGGACTTGCTGGAAAG
CATTTAGAACATTAGTTGATGCAACTGCTGCTGCCGGTGACGATCAATTGGCTT
AGTTGAATACTGAAACAACAGCACCACTTAGGTCGATTGTCTGAGCTGCGCCAG
GCCTCGGCAGATCCCCTTAGTGATCTGTTTGATGGCATTTTTCAGCAACCACAC
GGTTAAAGAATGATAGGGACAGAATAAAGACGATTAGTGCCAGTGTCGATTTAT
ATTAATCTCCTAGTTATCCTGCTCACAAATTTTGCCCTGCAATAAACCCAAAAT
GAGAGCAACATGAGTGTGTGCGAATCGCACTTGAAGTGGAGTTGAAGAAAGAAG
GCGCACACTAAGGTCACCGACGTCGACGGACAGGAGATCGTAGCGTCCGGAAGG
TCCATATCGGTGAAACCTCACGAAGCATTTTCCGGCCGCGACGGTGCTCGTCAT
TCAACTGGGTGACGATGCGGCCATCCTGCATGACGATTTCATAACTGCCGGCAT
GTCAGCCTAGATCCGAAAAGCCAGTAGAAGATAAAGTTATTATGATTGGTGATG
GGTCTAAACGGCAAGCGTGGGCTGCTCTAGCTCGCCAAAACTTATTCACCTGCC
AGCATCCCGACGCGCGCGGCGATCGGTCGTGGCGGGCGGCGGCGGCGGTAGCGG
TGGGTGCGCCTCGGCACGGTCCTCTTCGGCCACCGGCCCAAGTGGAAGGTGCAG
AGCAAATGTGAAAAGACCCGGCTGATAATGCTCACCGGGTCCGTTCGCGTCCAT
GCCACGCGCCGGCATCGACGCTGTCGCCCTTCCTCTATGGCCAGCTGATCTGGG
CTGAGAGCCTTCTTTATCTGTTCTTCTGTTTTCATAAGTACCTCCCACTAAGTT
GGGTGAAATGACGCGCTTGGTGAATATGTCGGTTTTCGCCGCATTGCGGGTCGC
GGAGGTTCTGTTTGTTTTAGCCCATGAGTTCAGACATGTCGAGCAGTGGTACGG
GCCACGCGCCGGCATCGACGCTGTCGCCCTTCCTCTATGGCCAGCTGATCTGGG
GCCACGCGCCGGCATCGACGCTGTCGCCCTTCCTCTATGGCCAGCTGATCTGGG
AATTGATAAAAGATTAAAAGCTGTTGACCTGCAATTGAGAAATACAAGATCGAC
CATTGAATCGCCATCAACCAGCGAGATTGTTCGCTAGATTGTTGACTGTAAGTT
GATTTCATTCACGTACATCTTAGCTACACGGTTAGGTGTATCTTCTAATGAATC
GCCAGCGAGTCCGCCCAGAGTGACGATGATGAAGATCGAGGCAGAATCAGCGAT
TCAAAGCCTGGCGCAGACAAGTCACAAACTCAATCGCAGACGACCCAGAACTAA
GGTCTAACTGCATCCCCATTAATCTATCTGTAAGTTTTTCTAGACACCTTCTTC
GGCGACAAGGACATCATCTTTGTCGGCTTCCGTGCTCGAGGGCCGGCCGAGCTA
CAATGCAATTACAGTCAGCTTTGGACTCGTAAGACAGCTTTAACACTGCCCCCC
CCTGCGAACTGGGCCATCCTGGCGCACTGCGCGAAGTCGTCGAGCTGCTTGTGG
CAACCCACAGGCGCCCCAGCCTCAACAGCCGCCGGCTGAGGATCTTAATAAAGT
AAAACATCAGCAAAAGAATCTCTTTCCTTGTCTCTCATTACCAAACCTACAATC
GCATTTCCACGCATGTGGATGAAGGGCTTGGGTAGTCAAGCAACCCGGAAGAGG
CATTGCCAATGACTATTGCGTAAATGCTGACTTGAAGAAACATCGTGTGGGCGA
TGAATGCGTCTTCGTTGTCGATGAGGATTTCATCAATGTTGCCGCGTAAGTGGT
TTGGAAGCAAAGAATAAACAAGCCGAAGCATTGCAATTAAAGGCGGCGAAGGCT
GTATCCAGGTGATAGACCACATTCTATCGCTCGATGCCTTCCGCTCAACCGTGG
ATGAACGCCTTATGGAATAGATACGGCGACAGATATTCCTTATGTGAATATCGG
CCCATGGCTGGTACGCGGTCGTGTTGCACATGGACGCCTTCGCCGTGGGCGTGG
ACCACAATCACCTCAACCATCTCAACCAGTACCACCACCTCGTCCTGCACCAAG
AGCGCTGCTCGCCGGACGGCGCGAAGATCCGTCGGACCGTCGCCCGCAGTTGGG
ACACGATCGAAGGATTAGAGCGCCACACTTACAAGGAAGGGACAACCCAACCTG
AGGTGGAGCGCAAACCGGGTCGCATTTTCCTGCCCCGGGCCGGCATGGCGCTCG
AGCCGGGGGGCTTTGATGCTGAGACCATATCAGGAGGCCGCCATTGCGCGGCTG
CCCAGCGTGACATCACCGATCGCAAGCAGGCGGAGGCGTTGCTCAAGGAAAGCC
GGGGGCCTCACGATTCGCAGGTTCACCCAGATACGGGGCATCTCTGTCAGGATT
AGTATGTTGGATTATCAATACCCAGATTAGTGAAAACAGCACGAATAATAATAT
TCATCAGCCTCTATGAACAGCGGCTGCAGATCGAATCGTGGGGACACTGGCTGG
GGCGCCGCCGTGCGCAAGGATTCGCTGCGCAGCTTGCGCGTTGCTGAGGATGGC
TTCCAATTGATACGCTAGAACCTGTATTTGTTAATGTGATATTTAAAATGCCTT
AAATTCAATATCTTGTGGTTAATAGTGGCAATAACCACTATATATTGATCTTTT
GCCTGAATTAACAGACTGGATTCGTCGCGTCATGCTTACGCATAATTTTTCTTT
AGACATCGACTTCTACCTGGGGGTAGAAAGAAGTGCCGCGTATCACCAACGATT
TGTGACGGGGGCTCTGGACATGTGACGGGGGCTCTGGACATGTTCCTTGTGTAT
TATTGTAGAATATAGTGGCATCTTGCCTTCAATGTCAGGAGCTTCCCCAATCTC
CCCTGTTCCACAACGTGGACGCGGAAAAGGTCAAGAAAGAAGCCAGCCAGATAC
GCGGACTTGATATTCGGCTGCGACATTGCCCGATTTGGCGCGGATAGATCAGTC
GCCAAAAGTATTCTGGATAACTTGTTTTCAACTCAAACACATCACCTGCTAAAC
ACACATTTTTTTATTGTCTAACCAAGTATATCAATGGAAAGCTCATAAAAATAG
CAGAGCTGTCTCCGCCGCGGCGAAGCGTTCCCGGGCCCGCGTCGCCGTGTCGCG
GGGCTACAGGGGATCACAGGAGATCATCATTGCTCCGCTCGCGTACATGAGGGG
GGTGCTGGATATCAGCACCATCTGCCCATGCGTGGATCACGTCTGCGTGTTTGT
GCAGCTACGACATCGTATTCTGAGATGAGTCAGGATGCGATGAAAACTTTGCAA
CTTTTATGGCAATAGGCTACACCATCGATGTTTATAACGAAGAAATAAAAGCCG
TGGGTTTTGGTTTTGACAACACAAGTGGTGGCAACTTAATCATCACTCAATCTG
TCAAATTCAGAAACAAACGCATCAAAGTTTTTGATAATACCGCTCAATGCGTTG
AATCGAACCTGTCAGAGCAACCAGTTCAAGGTTCTGCAATATCGCGCCGCGTCC
CGGCTTCCGATTGAATGATCTGACTGCAATATGACAGATCCGCGAACGATTTGG
TTTTGAATTCATAGATAGAATGAACTTTCTAGCTGCAAATCGCAATAAAAAATT
CCTGCGCCACACGCGCGGTCCGCGCCCTCTGCCATGCAGCCCGTTCGACCGTGG
CGGCCAAGTTGCGGAGCGTGTTTAGATCAACTTTAAGGGCGTTAGCCTGATGACT
GTAACTTACATGACATACGAAGTTGATTTAGATCAGTCCACTATTGAAACAAACT
GGGCGCATGAGCATCGTGGAGCAGAAAGTCCACACCATGATGGCGGTGCCGCTGC
GTCATTCAGAAAATAGTTGTATGTAAGAATTGATCGTTCTTTTGTATTATTGTTG
AAGCTGTCGCAATTGCGTATGCAGTAAAACGTGAAGCTAATAAAAAGGTAAAAAT
TGGCGGGCATAGAGGTCGCGTCCGAACGCGGTTTCAAGCGGCTCGGCAAGGGCCT
CAGCTATCGCACTCTGGTTGGTCGATCGCACCGCAGCAAAGGAAATGAAAACTAT
TAAAATCAAACTCAAGATCACACTTCAGAACACACATTACACCAACCATTATATC
AAACGTATACAGAAGCAAAAGACGTGTGTCGCTTAGCATTACTATCAAATGGACT
TCGAGGTTGCCTTCGATCATGCTAACGATCGCAGCAAGCGCGAGATCGTTGACTG
GCTTCTGCCCATTGGCCGCGCGCGTGATCCGGTGCGGCTCGTCGCCATCGACGAT
ACCAATTACTAAGAGAGTTCCGTCTGCTGATACATCAATACTAAACCAAATTTTT
GCTTTAACAAATTGACCACGGCGGAGTGGCTGCTGCTTTGCTACTGGTGTTTTTG
CACGTCCAACAGTTGGCCGACGCTGATAATCAAAATACGGACGCGGCAACAATAG
CAAAGACATCAGACATAGCAGAAAATAAGGCTATTCATGCTTATCTACTTTTTCC
GAACAAGGGCGACCCATTGTACAACGCCAGCCTTGTGGGCGGGATGGTGGCAGGC
AGAGAAGAGGAAGATAGGCGAGGGAAGAGGAGGTTTGGCAATCAAGGAGGAGGTT
GACTTCGTGTCCGGCATCGGCCAGCGCATCCCGCAAAGCCTTCTCGAATAGCAGC
ATTTGATCGCCAAAAATTCGAAGGAACAGCAAGGCAATGATCCGGTAAAAATGTT
TGCGTATGATTCCTAAGCACAGTAGGTAATAACACTTCTTCAGATTGGAGTGGAA
AAGGTCACCGAGCGCCGCTTCATCATCGCCTCATCACTACTGGCGCTTGCCGATC
CATTACACGGTCGACCCGAGCGGCATGCTGACCCCGCTCAACACGGTCGGCGGCG
CAGCATCCTTGGAAGAGGCGCCGGGTCGATATGGGCATTCAGGAAGCGTCTATCC
ACGGTGCTTCCGTCGATGTTGACCGCCGTCTGCGCCAGCAGCCGGCCGTTGATCG
AAACCATGACATCTAGAATCGCCCCTGCAATCAGCCGCTTTTCAACCGCGTGGAA
GAAACAGCGCAGTGGTAAGTCATCTGAGCGAAATGCTCGAAGGTCAGGTGGCAGT
CGCGGTATTGTTAGACGCTTTAGATGAATTGCGAACCACTTGGCGTTTATATCCT
CATTTTTCTCTTGTTGTCAACAATTGTGAAATTTCGCTTTTGGCGTATCTTATTC
CTTCTAGTTGTACGTGTTATCTTTAGGTATGGATTATCAAATAACTTGTTAACAG
GAGCGTTCTTTGTCAGTTTTGTAAGCCTTATATTGTCGCCAACTTGCTAATTCAG
CATCAAGATTGCAACCTCTCCGTTTGTTGCACACCGCCGCATGATTAACCCGCAG
GTCGGCATTTTGTTCAAATACTCGAGGCAAATATATCGCACCAAATTTCAATATC
TTTCACCCTCAATCCCTTTGTCGGCGCCGAAACGATGACCGGGCACATCGTCCGC
TGCTTCAGATTGACGCAACGCATCTTGGTCGCGCGATGAACTGTAATGGTTCGCG
ACAGTTTATTCAAGATTATGGATTTGAAAAGAGATACGTAAACTCTATGCTCATC
TCTACATTCAGTAATTGAATTAATATGTTTTAAGATACTTCATATTAGGATAAGT
GTTCTAATGGCCCGCTTTGTTGACTTCCAGACAAACTTTTCTACTGGCGAGCTTG
AAATTTTCTAAAGACCTTGCTAGCATTGAAGACAATTTTGACCTAGACTCAATAT
CGAGGCGCTTGTATTTGCGACCGCCTATGAGGCGGATCGCGTCGCAGGTAGTAGA
GAGTAACAAATGGCATTAATTAAATCAGTACCTACAGACTTCGGCATAAATGCGG
GGGACACTTTGGTAAGCACACCGACAGGATGTCTACCAATTAAACTTGTGCGTAG
ACTGGTTCGCGCCACCCGGTTTGTATAGAATACTTCCACCCAGCCCAGCCATCAG
TTGAGGTTCCTCCGTTATCTCATGAGCATGTTGTTAGCACCACAGTTGTGGGCTT
CTGATCACCGTACCGGTGGAGCTGCTGACCGCCGACCCGGCGCTGGCCGGGCACT
GTTTTTGTGCACTGAGATGGGCGGCCTTCGGTCGCTTTTTGTTGTCTAAGTAACA
AACAGCGTCTGGCTGTGGTGCTGGCCAACAACCCTGATGGCGACGTGATGCAGGT
CAAGTATAATATGGAATATCTGAAGATTTTGTAACATTTCTTTCATCCCTAATAA
AGGTCGAACGCCAGATGCCGATGCCACACCGGGTCCAGATGCAACTGATCCGCCG
GCGCATCGGCGAATCCGTCGAGCGCATGCTGGCGGACCGGCAGGTGCAGCGCCTG
TATGCAAGAGTTGGCATGGTATGTAAACCAGAACATCGCAATACGCCGCTGGGTT
GGATATCCTGTGGATAATTCTGTAGTTGACGGCAGGGGTGCCGGCCGTCATAGGC
CATGCGATACTAGACAAGAGTATCAGCAACTAATGATTGAAGGGGAAGTGTAATG
CATCCCCTGGGAGGGCACCGTGCTCGACGCCGCGATCGAGCGGAAGGCGGTGCAG
ACTCTCTCCGATGCACAGATTGAAAGCATTTTCAAGAAGGATACAACGCAAGCCT
GATCGCACTGACCCTGTCCGCCTTCTCCCGGTCCTCAAACGCTGCGCGGAGCGCG
CGCAGAAGTTACCAATTCACGGGACTAATGATTGACAAACAAACAAGCAACGCCG
GGGCCGGGGGAATGCTCTACCTGAGTTTGCCGCTGTTTGCGCCGCAGCCCAAAAC
CGTTCTGACGGGTATTCGGCACGATCATTCCGGTCACTCAAAGCACTCACCATCC
CTTCTAGTTGTACGTGTTATCTTTAGGTATGGATTATCAAATAACTTGTTAACAG
TATTGCCATGTAGCTGAGGAGCATCCTGATAATCTAAGGTTTATGAAGGACTGTG
CCAGTGGAAGAAGTCCAGGCGGAGAGTACCGAACCAAGTGCCGCTGAGCAAGTCG
GATTGCTGTAGATACATCAGTTGTTACCACATTAACGGGTACGCAAACATTAACC
AGTTCCTCAAGCGTGGCGGTGAGACGTGGCGTCTCGGGCATATATCGGCGGGCCG
CTTCTAGTTGTACGTGTTATCTTTAGGTATGGATTATCAAATAACTTGTTAACAG
GGGTTGTGGTTGAGGTCTGAGTCTCGTCCTCAAACACAACCTTCATCTTCTTACC
ACAACGCCCAGCCAAGGTCGCGGACGGACTTCAGGGCCATCGTCGCCCAGGACAT
CATATTTGTGATTACTGAAGCTGTGGTGTATAAATCCGTTGAGTTTTGAGCGCTT
CAGGGCGCTCAAGAGAGATTGCATGTTGATCTGCTGCCCGCCCCGGCCACGGGTT
CGCGACCTCCCTTTCACTTATTTGATCGCAAGATTAAGTATCCGATTGGGGGTCG
CATATCAATAAACAGTACTAGATTAGCGTTATCAGAATCTTCTCTCAGATATTCT
GATTGGAATTGCGGATTCTGTACTTGTGCGCCTGTTCGCAAAGCGTTAATCAAGT
GCAGTTTTCGCACGACCTGCGCTGCCACCAAGTTTCTCAACTGATGCAGCACCAT
CGTCGCGCCTGTCGCGCCGGTGGGGCCCGTAGGACCGGCAACGGTCGACGCAGCG
CGGACCAATGAGGAGATCGCTGCTGACCTTGACCGCTATGGCCGAAACAATCAGG
ATGGGATTTGCCGGGTCTGGAAGCAGCGTTTGCCGCCGAATTGCAGATCAGGGTT
TTGTTTGCTCTAAGTGTCGTTAGTTTACAGCCGTCCTTGGCTTGTGTCAACCTCT
GGCAAACGTATGCGGTCCGCATTTCCAAGTTCAAGGACAGCGGCGAACCTTACTG
AAAGCTGCCAGACGCACGGAGTTTTCCATCGTGTCGTTGAAGTCAGACATCAGAT
GCTGTGTAGCTGTGACAGAGTTAGCACTGCCGTTGACATTAGTAAACAGGGTATT
GGTGCGCGTTCATCGCTTGCACCTGGCACGGGCCAAAGTCCCACGACTTCACCTT
GACGAAGCCATCTTGGACGAGCGTGGTCAACACCTATTATGGAGCATGGGCAGGC
AAGGTTCATTGAGTTTGAATTCCATGTACCAGTACAAATAACAGATCCAGGAACT
GCCCTAAAGCAAGTGATTATGAAATAGTATAATCAGGGAGATAATGGGAAGGAAG
TATGCAGCATAAGTAGAACCATTCCACGCTGATATTATAGTTATCGCTTTATTTG
GCGTTTACGATCCTGGCGGCGCTGCACCTGTTCCTTACTCAGCTTTTCATGTTTG
CATAAACATCTTCGCAAATTATCACTTGATTCAACACATAAAACAATTCAAAATA
GAAGTCGCCGCACACGATCGAGATTCCGTTCGCGTTCGACAACATTAAAGAATCG
GATCTTTGTTGTTGGCGGCGAGTCAGATCGCTTCAAAGACAACATCGTTATCGGT
GCGCGCCAGTGCGGTATACAGGCGCATACGCGATGCCGATGTGGCGCGGTGTATG
AAACTCATCAGACACGGATACTTCCATTTCCTCAAAACTATAGCCCTTAAGACCG
ATGTTTGCACTTGGTCTTATAACAGGCCTTATGATTGGTGTCACAGGGGGGGGGT
GCGGCGATGGGCGCGACGAGTCGTCCGGCGGGACCGCCGGGCAGCTCCCACTCGA
CCATTGGTAGCATCGAGCTCGTCTAAATGTATCGGCGGTTGAAGGCTGCATCCGC
TTGAGGATTTTAGTCCGCATGTGATTTCGCTTATCTGCTCGAATCTGTCAGTTGT
TCTGGCCTGCTAAAATTTCAGGTCAAGTAAAACTCAAACTAAAGCATCTGCTTCT
GATACATAGATGTTGGCGATGCCGGGGAACTCCGCGTCGGCGGCGTCGAACAGCG
GATAAGGTAAAGTTAAATACCTTGATTTTCATACCACTTGATATTTGCAGAGATT
GGTGCGCGTTCATCGCTTGCACCTGGCACGGGCCAAAGTCCCACGACTTCACCTT
TCTACCTTGCGTGATACTTTAGTGTCAATGCCCATCCTTCTTATTGATGGGCGTC
CAGACTGCTTGCCCACTTTCACCACTCTGCAAACTCACATCAAGTTCGGACAATT
CAGGGTCAAAATTGTTGCTGACTGGCCAGAAGACATCATGTGGTTTTGCAAGGTG
TCAGAAGACCAACGTGCTCATCTAAACATCCACACCTGTTTCCGTTCACTGCAAT
GAAGTAAGAAAGAGAAAAGAATACGTTACTGGAAGAGTGCGGCATACAGAAGGAT
AATCCTGCACATGGCTAACCTAATTGATAGTGGCAAGTCGGCAGATGAAATTATT
GCGAAACAACCCGGCCCACGTGGATAGTAGGCGACTCGCGCAAAGCTGCAACACT
GAGCGCGGCAACGACAAGGTGATTTTCTTCGATGGCGGCGATACGTGGCAGGGCT
GCGGGCACGGAGAAATAAATCTCGAGCCTGTTCGCCCATGCCGAGGCGTATCAAT
GGTCTTTGATGTACAACCCCTTTACCTCGATGTCTACACACACACACACACACAC
GACGACAGGCCAAAGAAGCAATCGCAAAAGCAAAAGGAGAAAAGACATGGTCAAT
AATTGCCTTTTGAGTGCTTTTTCTTTTCATTATGCAATTCTTTTTTCTATACTTG
TATTTGCAGATGTGGAAAGATTCACACATGAGAAGCAATCAATCTCATAAAAACT
GGAAGTGGGGCGCTGAAAGCGGTGGCGGCCTATATTGACCTGAATCCGGTGAGGG
ATAGTTCAGTAATCTTCCATCAAATAGAAGTCTAATGCTTTTTCCATCTTTTTTC
CGGGTACCATTGCCACTTTTAACATTCCAGAAGCAGGTTTAGCTTGTTGATTGGT
GAGGGCAGCAGGTGCATGCTTGAAGCCAAGACTCTTCAGGTCGAATGAAGCTGCG
GTTCGCTGGACAGAAGGAATCTTCGACAACTCAGATGCTTCGTGAAATTAACGAG
CGCCAAGTACTTCCGCTACTACAACACGCGCCGCTGGGAGGACACCTATCCCCAG
GATTTTGATACTGTTGTTCCGCATATCTTTCCGGTTTTGTCAAGCACGATCGGCG
ATACAAACAAAGGTACTGGGTATGCCGTACACGGAGATTCGACTTAATCAGGGAC
GAGGCGGCAACGATTTCATCACCTGGTCACTGCGAGTGGACTTGCTGAAGTAGAC
CCTCCGGTGCAGTAGCCGCACTGAAGGCGTCGTTGTCGTAGAACTTCTGCTGAAT
AACTTCTTCAAGTCGAACAAGCTGCGCTGCCGCTTCGGCACGACGATTGTCAACG
TGCCAGAAGGCAAGCCTTATGCAATTCAGAGAATTCTTGAAATCAATCCGAAAAG
AATATCGACTTCGGCACTGGGGCACAAATTGCAGCCGGCGGCGGAGGCGGGGGGC
TCTAGTAGATGTTTAGGTACTAAACCATAGTAACGTAGCACTCGGATCTTATCAT
CATTGGCTGCGGCGCGTTCAATCTTTGGCGATGAAAGGAGCCTGACCAATGAACG
CACGTCCAACAGTTGGCCGACGCTGATAATCAAAATACGGACGCGGCAACAATAG
TAACAAAGAAAAATGTTATGATAATCTATGTGGAATGAATAAATTATCATATATT
CCATCGAAGTTTTTATCTAAAACAGTGAATCCACTTGATAGTACATTACCTACTT
GATCGCGCCACAACCCGCGTTATTGGCTGCGATGGTCATAAGCTAGCGATCTATC
TATTTGAGTGGGATAGTATGCATTAATGGTGCATATCATTTATTTGGTCATGTGC
CATCGAGGTGGAGCGGCTGTTCGCGTTCGAACTCGTCCTCGATGGAACCGACCAG
AGTGTAGTATTGATAGTGTATCCCCATCACAGCAGAGTATTTGAGGGATGGGGTA
GCAGAAGCGCTAGAGCGAAAGCGCAAGCTCTTTTGAACATTATAATACGGCGCGCT
AAGGTAAACCCGCTGCGGTCGATGCGGTGCTTGTAAACAAATCAGGTATTGTAATC
AGAGTTGGTCGGGAATGACCATGTCGCGCGGACGCAGCTCCTCTTTTAAACTGCCG
AAGAAGTTGAATCTGAAGAAGAATAATCAAACAATACATATCATGGAATGGACCGA
AATCTTCTTATAATCAAGTTGTGGATATGTATAATGCAGCAAATCCTGGAGCAACA
GATACTGCTCGCGGCATTGTGTCAGCTAACGACCCATATCTCTTGCTGAATAGCAC
TGTTTTTAGTGCGTGGAGACATTCAAATCGCCCTATTTTCCTGTTATCCATCCTTC
GAAAGCGCGAGGGGGGGCAGCCTGTGGCGGAGTCGCTGAAAGAACTGAGTGGCCAA
GGTGTCGGGCGCTGGCGGTGGCGTCGGGCCGGGGCCGGTCGAGGGGCATGGCGCTC
TAGCAGGTGTTTGTGCAGAGACTCCGGCCTTTTGGTTGGCCATTGCCATATTAAAT
GAAGTGAATTCTTTATTGGATTATCTAGTGGCTTATCTTGGGTGGCCTTGGGCTAT
GCGACAAGAAACAGTAGATTTGAACACGACGAACTGCCTTCATATCGCTATCAAAC
CTGTTGGGTTGGGTTACACCATCCTGTTGGATAGTCAGTCAATGGCTTTGACGGAG
AATCGCCTGCTGCCGTGCTGTCAGGAATATTCGCTCCCCAAATTGCCGCTGCTTGA
TGCTTGCTCAAGATGGTTAAGGTAAAGATGAGTATCTCCCAAGTTTCCGATTAACT
GGGGCATTCTCCATCACCACGCCATTGAAGGTCACGATCACATCGTCATCAGCCAC
CGCGTGGAAAAAGAAGGCTGGTATGAGCGTTTTGCGTACATCCAAGACGACGACGC
GGGCCGGGGGGAATGCTCTACCTGAGTTTGCCGCTGTTTGCGCCGCAGCCCAAAAC
AAAATGGCGAGATATCTAGAGAGTTTAGTAGACATAGAACAAAAGAAAGTGGGGTG
AGTTCAAGACCTGTAAAACCAAATATTTCAATAACATTTGGAACAGCTAAATATAC
TGCGTCGGTCACCGTGCTCGTGACCTCGAACCATCTCGCGGTGCTGATGGTTGCGT
AAAGTCGCCTCTGTTAATTCGATAATTTCTGCCAATTGAATCGGACGGCGCGTGTC
GATGCGGATCCAGTGCAGTCCGGTCGTGCGGGTGAAGAGTTCGCGCTCGAAGCCGT
TTTAATACCTTTAGTTACTTTGACCCCATATCTCAGCCTCATTCACTTTAATCTCG
TGTTGATTATGGTGCGGGCACGTATGGCGCGGGTTGTTCGCACGCTGCCTGACCTG
TGTGTGCGACTGGACGTTCGGCACGATGTATGCGATCCATATCGAACCGGAGGGCT
GACGCTCGGTTTCGTCGGCTGCTTCGGCGAGACGAAGTCGCTGAACACGCCGATGG
GGTGACTGCCAGCGCCCGACTCGGGGCGCTTGGCCTCGATCACCACCAGCGGAATG
GGTCGCCGTGCGGCGCATCACCGTTTCTCAATCCCGTCCAGACTGCATGGTCGTCC
GATACAAGCTGATACAAATTAGGTGCCGAACATGATTTACCAAGTCACTTCGGCGC
AACACGCAGGAGAACATGCTGTATTACAAGCGGCTCAAGCCGCTGTTGCTAGTGTG
AATCCAGCACAAGGCAAAGCAGAAGGATTCTTGAAGAACAGTTGGGATGACTAATG
GTTCCCCGAGACCAGCCAGATACTCGCGCTGGCGCGACGCTACTTCGACGAAGGCG
CAGTACATCCTCTTGCCGGATAACAAGGTCGCCCGCCTGCTGACCCCCACCGTGCG
CGTTCTTCTGCTCGGCTTTTGCTACGTTATTCTCAAGGTCAAACGCTCTGCGTACT
CCGGTCAAGTTGCAACTGCAGGGTGGCTACACGATCAGCGATTTCCGCAACTACGG
AATATTGCTCTATTTGCAGGCGATTTAGGCAAATAAGTATCTTGCACTTACTGCAA
CCTCTACCTCCCACTCGCCTGTCAGCACCTCCCACGCGGGCAGCCAATGCGCCAGG
CCCGGCGTACTGGACGCGATTCCCGGCGTACTGGACGCGCCGCCATGCTCCCCAAC
TTATCTTGATACACTAATATCATCATCTTCTAATGATAATAATGATATTGGAAGGT
TGCGTCGGTCACCGTGCTCGTGACCTCGAACCATCTCGCGGTGCTGATGGTTGCGT
CGCGTCGTGTCGATTCGACGCCACGTTACGCTATAACATCACACTTGTTACGCTAT
CACGCCGAAAGAGATGCGGCCGAAGCGATGACGAGAAACAAGATGCAGCGATAGGA
TCCTGGCGTCCGGCCCGAGCTGTTTGAGCGCGCGGATCATGTCGGCGCGGCTGAGC
ACGTCATCAAAATTCTTTGTTCCCATCTCTTCTGTGAGAAGCTTGGCCTTAGATTT
GAGACACATACGAGAGTTCAATGGAACTTGATGTGGACTTATATGGTGATGGAACT
TGGATACCTGATACATCAGGTAGTGCAAATTCCACATAAGATGTTCCTGTAACATT
ACCGCAGGGAATATAGCACTAGCATCAACAGCAGTAGTTAGTAAGGCATTGATAAT
GATTTAAGATTCTCGCTGCTGGTAGGCGGTTTGGTAAAAGTCGATTAGCCGCTTGG
CATCCAATCAGACCAAGAACAAGTCCCAGAGATAGCCAACGGAATATATTTAGGCT
TCAGTCTTACCGGCTTCGAAATGACGGCTGGAGATAACATCGAGGTTATCACGAAT
GATTAAAAGATTTTCATTGCACAAACTCTCTATAAATGGATTTTCATCAAACAAAC
ACCAGGATCGGCAAATGTTGGTGATGGTTACATTATTGCTGGCGACTTGTACGTGT
AGAGGTACGCACAGAAGATGCTCGCAGAGTTGACATGACTGCGGAAACTCTGCAAG
CGGGCATGTCGATCGGCGTGGTGCTCGTAAGCGTCGAGCTCATCATGATGCTCTTC
AAAAGCCGCCTTCTGATAGTGAGGAAAACCTGCCTACTCCCACATGCGACCAAAAG
TGGCGGTGGGTCTTCTTTCTCCCACCACTTCCACCACTCGCGCTTGACCACCGCAG
GGATAGTCTGATTGCCGCATCTGTACAAGGTATTAATTCGATGATGCCAAGACTGT
CCGATCAGATGAATCATAATTCTTTGTATCTTTATAAACATTATTAATTTTATTAT
AATAAATTACACCCCTCCTCACATAATATTTCAGATTAGATTATAACTTATATCGG
GTATCGACAATATAAATCATGCATTGTAGGACTGGTAAGATTGCGAGATTTAAACT
CGCTGCCGTGGTCAGCGCCAGTCCAAAACCCAACTTCCAGTTACGAGCCCTCATCG
ACTGCACATATGTCATATGTATATGTGCAAATATATTTTTACACAAACATACGCAT
GGCACCGATGCTGAAGCGCGCGCTTTTTGCGTGCCGAAGCGAATTTTGACACATCT
GTTTCCATATTTAAGCCTGCGCAAAGTGGGCAGTCTAGCTTATCTGCTAAAATTTT
CTGCCTCCGGCCGTTACCGTTTGTGATCGCGGCTGCTCCGTAAACGACCGGCGCCG
CAAAAAGCATATCACATGTTGCGGATACCCCGTGACTTTCGGACACATTTTGTAAC
CATCGGTATCACAGTCCGTCGCCATGAGCTGGAACCACAACTCGGCGCGCGTGAGG
GCGACAAGAAACAGTAGATTTGAACACGACGAACTGCCTTCATATCGCTATCAAAC
GCCATGCAGGGTTTCGACTGAAATCGGATCAAATTTACTTGAGATGCCATAAAGTT
GCGATCATGACGACGATCATAATCGCGCTCTGAGTCTACCTCACCGAAGACCTTGC
TGGTGCTGGATATATTGACGATGAAGACGTACCAGTAGAACTACGTTCTACATCTG
GGCGCGCGATGAAGTCCGCGGTCTTGCGAGCGAACACCCGGTCGTCGTGCGCGTGC
GTCTTTGCCAACTTCCTATTAGGTATTAAACAAATTGGTCAGGCATTTGATGTCAG
CACAAGTCCCTTTGACGGATTTAGTAGGGGTTCAATTCCTCTCAGGCCTTCCAATC
TTTGCCATCACTGAGCTAATTAGCTTAAATGTAGGGCTCTCTTTCCCGTTCATCAT
GATACCATTGGGCCACCCCATATCGGCAGCGCTGTACGGTTGCATATTTGGATTTG
GAGGCTCGGGCTGCTGCTGGCTCTCCGCTGGCTCAGGCTGGTCAAGCGCAACTTCT
CCTTAACTTGCTTGGTGTACGACATCGAACGAGCCAGAGCCTTGGTATAACGCGAC
AATAGCCGTACGCAATGGCCGCGCTAGTGTCATTGTTAAAGTGTTTCATTATTTAA
TCCGGTTCAGGGGCAAATCCGTCACCATACTGCTTAGCATAGTCCCTCCTATTGAT
CGAACAATTCCCGATCTCGCCCCACGCCTGGGCCACCAGTTCATTGGTCGGATAGT
CTTCGACATAAGTGTCCAGCAGTGCTGGTCCAAATCTGTGATCCCAAGCAGCTATC
TATGTATTTACAAACCAGAGACAAACGAAATGTTTGATTTCCAGGTGAGTAAGAAC
CGCGGTAGACAAGATCAGGAGGGGCGAATGAGCGACACAGCCAAGTGCCCGGTGTG
AGAAAAATGTAACATTAACTGGAGCTTCTTGGGTAGCATTTGATAGTTCGGCAAAT
GACAACTTTTTGACCAGCACGTTGTAACATCATTGTATTAAAATAACTTAATACTG
TAAATGCGACAGTCATCGGCAACATGGTCAAAAATGTGCGCGGCACACCAAGGCGC
AGACGTTCTTCTAGGTATATTATTCAGTATTTTCGAGTGCATTTTTGATAATTTTG
GCTTCCCGCCGGCGTACACCGAACACATCGGGCGCCAGGTCGCGGCCCGCGTGAGG
ATTGCCGCTTCTGCAACGGCGTCGAGCATCAGTACCAATGGAACGCTTGGGAGTAT
TAGCAACTTGACAAAGTTTTTTGGGAAGAAAACAAAGGCATCAAATTGTCAGCAGA
CATTGTAGTTTAGTATATAGTCAATTATACATGGTGACCAGAAAATGTCAACAGTA
GGTTGAGTCTCCATTGGCTCTCCAGCATAAATTTTCATCCCATAATCAATGTTTCC
GTGCAGCAGGAAGGGAAAAGGAGCTGGGGAGCGAGGAAGAAGGTGGTGGGGAGAAG
CCGCCCTGACCCAACCGGCGTGACCTTCCAGCGTGCGGATCGCCTCCCCGCGCTCC
GGGCTTTTTATTGTCTGGAGCCGCAACGGAGGCGCGTGTGAAACTATCAATCTATG
CTACAGATCTTGTTCCATTTAATTATATCAATAAGTATATGATTATAGATGGTTTA
CGGGGTCAGTGAGTTCGAGGTAGATCGAGGTGACAGTGTTCGCCGTGTTCCCTGAG
GATTGCAGATATTTACTCCCATATTGAACCATTTAAAACCGGCTGGCAGGCAAACT
GGCATTTCGCTGAACAATGCGGCCCATTCCCGCAGTTATTAGCAGGATCGGGTTTC
AAACCATCCATATCTAGGTCAGCCGATTCACCTACTAAATGTTGTGATTTTAATTG
AGGTGATCAGCCGGCTACATTGGTAACAATACCAATATCGCAACGATGAAAGCCAA
ACCGGACTGCGTGCTGCCCAATCGGTGACCCGTCAGAACATGGACTGGGAAGACTT
TCAATCCACTTGCGGGCGGCAGCTACGACTTCAGCAAACACCACGCCATCGAAGGT
GATCACCTTGTTTATCAGTATATCTATGATGTTGTCTATGTAATGAGGCCCACGCT
GAATACCACCTGGATTGGAAACGCCTGCCCGAAGAACAGTACGGAGAGGTGCAGGG
CAAGCCCGAGCGGCTGCCCTGGCTGATCTGGACCTGACCGTGGACCGTATCGGCCT
ATGTCTTACCGTCTACGAAGACAGTCAGACAGTATTTTAAAGCGCTTTAGCGCCGG
CCCGTGACCAGCGCAGAAACCAAGGGAAGTGGCTGGAGTCGCTGCAGAAACTAGGG
TGAGCAGCTTGACCGCCTCGTAGTTGATGATGCCGCCACCAACGCGCTTGGTCGTG
GCAGCGGTCGTGAAATTACATAAGGGGCGGTATGATGGGACTATTATCAGGATTGG
CCTGCCTCCAATACCGCCCGAATCCGAAATAGTAATCGCCCCTGCCGATGCGCCCA
CGTTTAGCATACGCTATAAGTTCAGCTATTAAAAGAGATGGTATTAGAGCAACCTA
GAACATTACGTCATCAATGCGAGGCTTTTTCTTTTTCCACGATGTCCGTGCAGCAT
CTTCCTGCGCAAGACGCCGGCCGACGGGGAAAGCTACCCGCGCCAGGCATCACTGG
AAGTTATTTGCGCCTTCTCACGCTTCACAGAAGCCTCGTATTCAGCCAAAGTCGCT
GGCGTGGCGCTCGAGGCCGCGCGCGTGCGCCCGACCTTCGAGATCCGTGCCAGCCG
GTGGCGCGAGCCGTTCTCCGCCGGCTGGGAGCGAGCGGTTGACAACGCTCGTGGTG
GCAGATAGTCCCGCGCTCTCCCGTAGCCAACGGACTCGCGAACCCAAAGTTTGCAT
CAGCACCACCAACGATTTTGGCATCAAAGGTGCCAGCGAGTTTTCCATCGCCTTGG
GCTGCTGGACGAAGAAAAGCGCAGCAATGGCACTGACATCGGAGCTGTCATGAGGC
CCGGGCCCGGGTTAGATTCGAAGATCGATCATGCCGCGGGCATTCTCTTTCGCCGT
GCGCGTATTTTATCAAATTACTCATCTTTAGATAAACAACTCCCTTAGCATAAATT
GATTTCCTTTCTCAATTCTCATTATGTCTTATCATAGCACAAAGGAACGGAAAGGG
AACAGCACCTTGGAATTTGTACCACCAAGCGGATTGTACGTACAAGTAGCAAATGC
GTATCGGCGGGAAGAGGCGCTGGTCGCGTGTCGAGGTACTCAGTCGACCCAGGCGG
TGCTTGCTCAAGATGGTTAAGGTAAAGATGAGTATCTCCCAAGTTTCCGATTAACT
CTTCGACATAAGTGTCCAGCAGTGCTGGTCCAAATCTGTGATCCCAAGCAGCTATC
CTTTAGCCTTTTCACCTCTTCCATCAGCTCTGCGAGTCCCGTATTCGTTTCCTGCG
TGCGTCGGTCACCGTGCTCGTGACCTCGAACCATCTCGCGGTGCTGATGGTTGCGT
GAATCATTTAAAAATTTCTATCAGAAGAAAATAAATTAGGTAGACTCAGCATCTTT
CATTACTCAACGATGGTTGATAAGACCATTCAACAACTCAGCACGATGCAAGGAGT
GCTTGAGGACGCCAACCTTAAGCGAGTGGCCGAGAACGCAGGCGTGCATCCGGCCA
CGTCGAAAGCGCTGGCAGATTTGAATAATACCACATCTCCAGCGTCGCAGGCGTGG
AACAGTCCATGGAAAACAGGAAAATAGAGGAAATCGACATACAGTTAATAATGTAG
TGTCAATGGCATTTAGTGCGATTAGAAAAACACCAATCAGTACATGTATAGGATTT
AAAAAATAAGTTAGAGAGAGGGCTGAGGACATGGCATGGTTCATGATTTCTGCAAA
TGTATGTATCCTGGTGCATTGGTATTAAAGTTTCTCTGAATATAAACTTCCCAACC
TCGGTTTGTTGCCGAATTGCATTTGGATTATCGGTCACACTGTAAAGCAACGGTTG
GGCGGCGACCCAGATGGAGGTGGATTGCGGAGTGCGGATTTCGGATTGCGGATTGG
TAAATAAGGAATCAAATCATGTCAAATATCACAACATTCTCAGGTGCAAATTTACC
TATGATTTGAACTTCCAGCCACGGTCTTTGCAGTATTCCTCTGCGGCTTTCCATTT
GGCCACCTGCGCGTGTTCGTCCCGCCGGTGCGCAGGATCGACCCGTACGCAGCGCC
GGCTTCGAAGATGGAATTGCTGGATACGTTGCAGGTTACTGGACAACTTCAGTTAC
CCATTTTTGCTCTCCTCTTTCGCACGTTTACTACGAGGCGTCTTGACGAGCGCCGG
AGTTTAAGTTCGGATCACCCGTATGAAGATGGCTTAGAGGAATCCTACGATGGAGG
ACTAAATGTTTATGCATTAGTAACAATCTAATCAGTTATCCTATGGTAATACAATT
CATGGCCTTCCGTCCGCGCCGCATCGTTCTGACCAGCGTGGAAAGCGACCACCAGG
TGCAACCAATTGATCTTAATGTTTCAATTGAACTGAAAAATGTATTTTTTGTAAAC
CAGGTTATTTCATATTTAGACGCACTGAAGATTTCATATGTTCTAAACCCTCGAAT
CAAATTCCAAGAACAATATATTACTAAGTTTGCACAATCAATCAAAAACAGCATGG
GGGATGCAGGCGTGATAGATGTTGGCCAGCAGGGGCGAGATCACCCCGCCCTGCGG
TGCGCCGTGATGCCGTCGGCACCCGCCTGCTCACAGAGCCGCGCATGCTGCGCGGG
GCGTGTCTGGTATTTCTTTGGAAAGTTCTGCTCGATCCCATCCTCTTCCATACCGCC
CAAACCCAATAATACTCCACCGCCCATACCGTCTTGACCTGCACCACCTAATAAATT
CGTCCGCGGTTGCCTCGGGCTGCATGGAGTGGACCTCCTGTGCGACTCCGACCTGGC
CCGCTCGCGGTCGTGGCCGGGGACCGGTTCGTCATCCGCAGCTGCTCCCCGGTGACG
GGCGGCGACGTCATCTACGTCATCGACGCCGTCCACGGCGTAGCCGAAATCAACAAG
CTGAGTCGATTTTGGGGACTGCGAACATGACATCATCCCGGCTCTCCGAATGCCCAC
AACAGGGCTGGCTGGAGCAGAACAAGGGCTGGTTTAACGGTGATCCAACCAATGCCC
CAAGATTTAGGGCACCATATTTCTACACAACCCAAAATCGAGCTGTCACAAAGACTG
TGCCGTTCAGGATGACAAGGCCATTGGCAGGATTGCCAATATTGAATCCACCGGGGC
CTTCGATGAGCATTCTGCCAATTAGCTCAGCCTTTGTACGCTTTGTAAGCTCTATTT
TGCTGGAAAATAACATAGAATTCCTCAAGGAATTAACGGCATATTGCTTTAATCCGC
GGCTTGTCAGGTGTGCTAACAGGTACTACCTTTGCGTTCTCGGTTGTTGCTTGAACC
TCAGTTGCGCCAGAAAGCCACTTCAAGAGGGCCTCGATGGCATCAATATCAAGATGT
CGCTTCGCGCCCTCAACCACTTGACATCTCTGCTACTCGGTCACTACAAAAAACGTT
GGTGCCCTGGGGCATGTCGCCTGTGTGATTTGGAAACGTGAACATTAAACATAATTT
AAACTGCATTTTAAATTGGTCTCAGCGGCACTTTCTGGGACAAAAGCCGCACTACAC
GGCAGAATGACTGGGCAATTTGCCAGACCAAGATCGTGGCCTGCGTTTACCGCATCC
TGTGTTAGTGTAGCCTTTGTTACAGATAAGGGTGAAACTAAAATGCAATCATTCAGT
ACCCAAACGGCTGTATAATTGAAATTAATGCGAAACAGTTCGCAGACACACATACAT
TCTGTTTTATCTGGTTCTGTTTTATCTGGTTCTGTTTTATCTGGTTCTGTTTTATCT
TCGACCTCCTCATCTCGCTCGAGGAGGGCGACCCGATCACCCTGGACGACCTCCCGG
CTTTACTGGCTCTCTCCAGTGTGCTTGTCCAGCACCCCAGAATATAAGCAAATCCCC
AGCACACATCGAGAATAAAGGAGTAAACTTTATAAATATATTAGCTCTTTTTTTATT
CTGCTCCCCCTCCTGCCCCTGAGATGGGTGCCGCCGAAATACCAAAAGCCCCTCGAA
TGGCAGTTGGCAGTGGTGATCTGGGGACCTTGCACCCGGTAGCGGGTGTGCGCATGG
GATCGTGAGGATAGTTAGCCGGGCTTACCGTATTCTAAATTCCGCGGGTAGTGGAAA
GATACCGACGAATCGCCGGAAGCGCAGGCCATGCGTCAGCAAATGGAGCAAATGGCC
TGGTGTGCTTGAAATTGTTTCTTCTTCTTGTTTCACTGTCTGAATAATTGACAAAAG
TGACGCTCTTCCTTTGCCTGATCCAGTTCAGTCGAAAACTGCTTGCGCTCTTCTGCC
CAACATATTCGCGGTTATACTCCCAGGTCAGGACTTCGGTAAAAACCTGCGTCTGTC
GGTTGTCCCAAAGAACCATCTGTTTCACTACCAGTAGACGACGTTGATAGATAAAAT
CATACAACCATGGCCACGGAGGACCGACAGACGTGGACCCAATTGACAGCAATTTTG
AATCCATCGGGCTCGTTGAATACGAGAAGGCGGAGACTGCGGTGGAACTGGCGCGGG
TTCACCTACGGCGCCACGCTCGGCAGCGAGACGCTGGTCGTGGACTGCGCCAACCGT
ATATAGTTTCTCTGTTCCCATCTTTCATCGCAGGAGATCATCATATGGCACTCGACC
CATTTCTACTTCTTTTGCAACACAATCTGAAACATTTTCAATTAATTTTTTAACAAT
AATTCACCTTCCCACACTTCAGTATTGAATAAGCAATATGTGCTTTCGGTCTGTGAT
TAGACCTTGATGCGGAAGACCGTGCGGATGACATTCAGTCTGCGGTCTACATACTTG
AGGGCAACGCGAACGAGGAGTATGACATCGCGCGTCTACAGACTTGTGTAGAGATTA
ACCCACTGGGCCAAGGTCACGGTGGCCAAGTCGCGTCTTGAGACTATTGTTCAACAC
GGTTTCAAATATTACTTGTCCCGCAGTATCACCGATTGTATATGCTACTGTGGAATT
TCTGACATCCACTTACCATACCACGACAGATACGCATTAGTAACTGCTCTCCGTGAG
AATAACTTGCGCAATATCCCAGCACTTGCTCGGACTCAAGGTAATGCAACGTAAATG
AGTGGCACGTCGGCGGTGTTCGATACAAATGTCCAATCGTTTTTAATTACTCAACTT
AGCCCCCCAAAAAAGGGGAGCCATCTTGACAGAGATAAATTTCTCTTTATACTCGCT
TCCTGCCTGACGGCACGCGGCTTCGAGATCGGGTGAAGTCGCCCGTCAGCTCGAGGT
TAGACTATACCAGTGCCTAAGCCTATAACACACAACAAAGGTAAATAGGAATTAAAT
CGATGCACCAGAGCGGCGCGCCTTGGTTGGCCAAGTCGGAGAGGAACAGGTACAACT
TAACCTCTGGCAAATCCAAGCTCACAGGCGTTGCTGTAAGGCTCTCTGCACCGTACC
GATGGTACTTTTGAAACTATTGCTCACCACTTTCGCAGTACATTACAAATTAAAAAA
GCAAAGTTGAATTAGCAGTTGAGGTTGTTAAATATCCTGCAGAGGCATGATTACCCC
AGGTGTTGAAATACAGACGTAAGACGTTATTCAACTGCTCGTTATAGCGAGAAGTGT
CACTCTAGCAGCATTCACAATATCCAGATCAGTCCCTAGCTGATCGATCATAATCAC
ATTCCTTTGAAGCTTCTACTAACTATCTTCAAATTAAAATATATTATATTCAATTGT
GGGCGCGCTGTTCGGTCTCGATGCGGCTGATGCGCGTCATGGCGCGCTCGGCCTGCG
AATGAAGCCCTTTGGCTTATTGAAAGAGGATTTTACGAATATTGCAGGAATTTCATT
CGGGGTCAGTGAGTTCGAGGTAGATCGAGGTGACAGTGTTCGCCGTGGTTCCCTGAG
TGTTGTTACCAGAGTTTGAGCCAACTGCTGATGCTCCACCACCGCCAGCACCTGCGG
CCGCAAGATTGATTTGTAGGTAGTGTAAAGAAGAACAAAAGAATATTGATCCACAAT
TAGTGTTGATTTCGTGCGAATCCCTGCGAATTTTTTTTATATTCGCCAAAATAGTCG
CAACTTTCGGCAGTATCCACATCTCCCCAACGCGGTGGCGACCATCGACCTACCGCG
AGCTGGCACGGCGGCTCATCAAGATGATATACAAAAAAGAAGCGATAAAAGCGCTTT
TGAGTGTGCGCAGCATTAGCGTAGTTTCCGCTTGGCTGCAATCCGGTTACACTAACT
TAGTGGTGGTATAACGGGTGGTGGTGATTTAACAGCAGATAGAACATTTACAATTAG
CAAGGCAAGCGCCCCGGATACGATGCTGGCGGTTGCGGGCGTAGCTCAATGGTAGAG
CAGGAAACGCCCGGACTGGGCGGCCGCATCGGGGAAGCATGGTTCACTGACCAGTTC
GACGATCTGGAAGCCCTAGATTGGCCGGAGACAAAGAACAAGCAGCGCGACTGGATT
CTTCTTCTCTTGATGCTTTTCCATTACTTTATTGTAGGCAGTGGTCATTTCATTTCG
CTGTTTCGGGTACTGGCACGACTTGAGCGTGAAACGTATCTCCAGCCGTTATCTCTG
GGTGGTTGACTGGGCAAGGTCCAACTCCCTGGAGAACTTCTTGCTGCCCTTGCGGCC
GACTTCACGATCGACCCGGTGCAGGTCTACGAGACCCGGGCGATCGGGGCCGACGCG
CCGGAGCGGTTCGGGCGGCCGGCGGGCTTCCCATCATCCTGCCGATCGGAGATGACG
AAGTACCTTTAATGTTTACAAGATTAGCGCCTAAAGCACGTAGACGTGAGCGTAGTA
CCGGTTCATCGTCGCGTCAATGACCTGCGACTGATAGGGGACATGAAGCCCGACACG
GTAATTCGTCCCGGCCTTGATCCAGAGCTCGTAGTCGCCCGCCTCCTGCGCTGAGAC
AAAAATCCTTCTGAATTCAGAAGGATTTTCTTGCCTCCCCAGCTATCCCGATAGCTA
CGTCGACCAGTCAGTGCTGGACAGGTAACCGTTTGCGCTGGCGCTGGCCACCGGGAT
TGGCCATTGACTTAGAAGAAATGTCAGCAGTAATACATTCTAACGCAAAGGCTAAGG
AATCCCAGTCGCGTTGCTGGATCAGGTCGCTAAGAACATTGGCGATCAAAGTTGGGT
CGCATTGGCGTTGCGCAGCGTCAGCACGCGCAGGCCCGCGCCACCGGCCGCCAACGC
CATCTGTTATTCTGATCGTTAATTACTTTCGGTTGTATCAACAACTTCATTTTCTTG
TGTTGAGGCGTGGGGAACTGAGGACTTGGTTGACGAACTCGCGTAAGGTGCTATTAT
TAATGATCAATCGAATAAAGTAAAGCAAAAGAAAATTACGTAAAAGGTGATCAGGCT
CATGACTGAGAGAACTGCCACTGCTCAGATTAAACGAAATGGTCGCGGCCGGAAATT
GGTGGTGGAGGCCTGCTCCCTGCTGCCCTTCGTCATCCCGCCCATCGTGCTGGTGTT
CCACTGTTCACCATGATAGTTATTAATATTGACCATGTGAACGGCGGAGCCTCGACC
GTTGCCCGAAGACGCCGGCCGAAAGCCCCGCCAATCCTGCCCCGACGATGATGATCG
ACAAGGTTTCGGAAGGCTCATCCGGCACTCGGAGGACAGGGGCGCGGTGGCCGTCCT
TGCCGTTCAGGATGACAAGGCCATTGGCAGGATTGCCAATATTGAATCCACCGGGGC
TCGGTCAGGCGCATGAAGCTCCCGATCATCGTATTGACGGGCCGGCCCCACGCCCCC
GGATCATTGGAACCGCTGAGAAGCGGATTCCCCTCTCGGAGTCCGGCGTCCATCGCG
GGGGTGGTCCGGGTCATGGGCAGGATCTACGAGCACACAAACTCTGTCGGGTTCAGG
AGTTCGAGCGGCTTCGCGAGTATAGATAGCGTCAACACTTGACCGTCTGCGCTTCCT
TAAGGCACAATTCCGTATCGATCACATCGATATCACGCGAAGGATCGATCGTGCCCG
CCATGACTGTGCATAAACTGAACGGGAACAATAAGCAACAAAAGGAAAAGACACTGG
CAAGCCGAACTAAGTAAAAGGAAGAGAAGACTTGAAGGTGTCATTAAGAACGTGCTC
CGTCGCGTATGGTGGCAACGCAGCCTCTTCAGGATGGATGGCGAGTTAATGGTATCA
TAGACCTTGATGCGGAAGACCGTGCGGATGACATTCAGTCTGCGGTCTACATACTTG
GGGGTTTAACACACTGTCGCTCGCGCCCGCCATGGCGATGGCATTCGTGCCGTCGCG
GGCTTCTTGATTGTTCGCACTTTCGCTATTGTTGTTCCTGTTATTGTTTCTGTTGTT
GATGGCGATGAGCTCGGGCCGGATGCGTCCAATGAAGTCGAGGATTTCCTGATCAGT
ACCGTACGCCATTATCTGACCGGCAGGATCAACCAGCTGCATCTGGAGATTACCAGT
AATTACATCATTTGAAATTATTTATGGTAAAGGAATCGACTAAGCTTGGAGAAATCA
GCGAGCGTGGGCCAGATCTTCAACCTGGTGTTCAGCGTCAGCAACAGTGGCGGCTCC
CCGCCTGGTGGCTCCGGGATCTCTGGCAGCGTGGAACTCGATTTCGGCGCGAGCGAG
GGAACTGAGTCGGCCCGTCCTCCATTCCCTTCATCTCCTCTGCGTACATGAGTCCCG
CAAAGGCGAAGATGGGAAAGCAGCATCCTCACCCGAAGGTATGCCTTGGGTACGCAT
TCAAAAAATCCATTGTTATCAAAGTTTATTTCAGCCTCTTTTCTCGCCAATCCCATT
TATGTAATTGTATATAATTTTATATTATGAATAATTTCGTATGAAGTATGTGTTATG
CATGGCAGTCCAACCCAGAACCGGGGTGCGGTATCGTCCCAGTTCACAGCTCCAGTC
TGTTGGGAACTACAGTGGCCTTCATGCTCTCTTCAGCATAGTGGCCTTTGGACGACC
CAACTACACCAACTGCTTTTCTGCCTTTGGTTGTGCCGCCTTTGCCGTTATATGTCC
GTTTCAACCATACCATCTAATCTGAGCTGATAATAATATACCCCTTCTGCCAATTTT
CTTCATCGCCAAACTGTTCGGCGTCAACATCGTTCAAGACCAACTCACCGACGGCGT
GTCTTGAAACATCGCTGCGTTTTGAATCATATTCACTCGTTCTCACCCCTTTTTTTT
AAGTTGTATTTATTTATATATTTGGCACTTAGACGTGTGCTTGTCATATACAAGTGT
GATCGTCATCAGGCCGGCGGTGGTCGCGATCGGGCGCCGGCCGGGGTGGCGCTCCGG
GTAATTGATGGTTCGGCGTGGAAAGCGCTTGTTCGCAAGGCAACCGAGACACGCAGC
AGCACAAAGTAGTTCAAGAATATTTCATTGAGAATCACCCGGACTTTTTAGCAATGG
CATGCCCTTCTCTGTGCTGAAGGCCTCGATGTTCATCACCAACACGCGCAGATGGTC
GGTATGAGGTTTGTATACTGTGTATTTATTTACAGCTTCTGACACTTTAGCTCTTGT
GATGCGCTCACGGTTCTTCAAGTAGTACGCACGGTTCTTTTCGGATTGGGTCACGGG
CAAGTTCGCAAACTTCACTAGATTTGTAATCGCTAGCCCAGCTAGATAAAAAAAATT
GATAACCATAACTTCTGCCATGTTTGATTAATTAATTCATTATATTCATTTTGTAAT
AACCGGCAGCAACCAATGGAAGAGTTATGCAACATGGCCGCCAAAAATGCCAGTAAT
TGTTGCTGCAGCAGCTGGCGAAGCTGGTAGAGAGTTTACAGCATCCATCTTTTTCTG
CACGAACGCCTAACTGCCCCGGTACGCTGGTGGGCGTGTCAATGCCGATGCGCTGGG
GCCCACGTATACTTCGTCAATATAGTATCCTTTTTCCTTCTGTGTCATCGTCATAAT
GATTATTAATGGATTTGGGCATAGACTTAAAGTAACTAAGGATCTTGGTGGAATGGA
TCTGACATCCACTTACCATACCACGACAGATACGCATTAGTAACTGCTCTCCGTGAG
TGTTGAGGCGTGGGGAACTGAGGACTTGGTTGACGAACTCGCGTAAGGTGCTATTAT
TGCTTGCCGTGGTCCAAGACCAGCAGCACATCATCGACGACCTCACCGCCCGCATCG
TGGATATCTGGTGGGAGTTTTACTCCATCTCGCGGAGATTCTGATAGGTACTGGTAT
ATGTATATACGGTATATGTATAATGAGTCTTAGATTAATAATAGTATGTGATGTCCG
TGTTATCGCCTGCCTTGAGCTTTGATGTTGATCTCGACCCAATGACAGTATTCCCCT
GAGATCACAGGCGCTACTTTAGCTGGTGTAGCTGGCGCTGTTGTTTCACCAACTGCT
TTCTGTGTGCAGATACAGGTATGCGTCAGGGTGAGTCTGCCTAAAGATAGCAAAACT
GCCAGGTCGTAGTGCTTGTCGAACATCTCGGCCATGCCCAGCCAGTACTCGCCGTCC
CTTCCCATAGCAGCTATTGCTAATTTTTTTTGTAACAGATTTTTTGTTTCGAAATAC
GTTGCGGGCGTGAAGGGGAAGAGCCGCTCATCATTCGACTGCCCAACCTCCGTGCCG
AGTGTTGATCAAATTGTCTCCAATCAGCTTATCAGTATCGAAAGCGATACGTTTGAT
GATGGAAGCTATAAATACAAGACCAGCAATGCAGCCAGCTACTACCGACAACTAAGT
CAATCATGCCGCTTTCCCAAACCAGCCGGATGAAATTGGCCGGTTCGCTGAGTGTGG
CAACAGCAGCGCCCTGGTTGCGGCGCAATTGAACCTGACGCTGGCGGGCAACGTAGG
CGCTGCCTTGGCGCGAACCGCAAACCCACCCAACCACCTATTTTATCGCAATTACAT
GTGATGTTGACGTGCTTGTTGATGGAGAAATACTTATTGAAACTGACGGACTAATAG
GGTTTGTGCTTGGACCCCGATTTCTCCATTCGTTGCGATGATCTGTCCGGGACGCAT
ACATTGGTTGAATTTCGTTCATCTTAATGGATAAAGTTGATCTTCTCGTAGACTTTC
CCTTCCAGCAGGGACGGATGGACAAGGCACATAAGTCCGGCGGCAACTCCCCATTTC
GAAGGATAAAACAGATAAATGATATTGAACATATTGATGTTCTTATTCCAAATTTTG
CAACGGCAGCTGCCGTTGCCGGTGTCTAGCAAGACGGTGCGCTGATGGCGGTCGGTA
GGATACATAACCTCTGCCTTCTCTACTGGCTGATTCACTAGATCCCACAGCCCACCC
GAAGAAGAACCATCTTTAGTAGATAAAGGAATAGACAAATTCAAAAGTGGACAGGGAT
CTGGTCACCGGCATCCCGCCTGAACGCTGCGCCGCCTCGTACCAGCGCTCGCCGGCCT
TTATCCTTTGGATTGGGAGTGATTGATGGAACAAAGAACAGATGAGTGGTACAAGGCT
GAAAATGGATCTAGATAAGTCTGGAGGAGGATTAACACACTTCCATCCCTAAAATTAG
GGATTCCCTCCGCGGTAAGCTGCATGAAGTCTGCATCGGTGAGAGAGTATTCAGGCAT
CTTCGGACTTCATCTGCACCAGGCTCAACTATTCCGGGGTACTGGACTTCACCACCGC
GAGGGTGCGCGTATGACAAAGCACGCCAAGCGACACACGACGGCCAAGCTCATCCGCG
ATTCAGATATAGTCATAAGAAAAACCCCCGAGTAGAGATAGGGGAGGAGCCTCTCACT
GCAGCGTTTAAATATCTGCTGCGTGTTGGGTTACGCTCTTTTTTCTATCGAAAAAAGC
CATTCGGTTTGACCCCTTTCTCGATTGCGCCGACTTCCCGCTCGGCCCGGGCTTTGAT
CGCACCATCATGGACTGCCAGTGCATAATTTCCTTGCCGGACTTACCTTTCCACGAAT
AAAGGACGATGGGTTCTTAAAAAAGGTATGCCTGATCAATGGCGTATAAATTATACCT
CATCCAGAAGATCTGAATAATTTTTAAGCAGCAGGTTGCTGAATCCGTCGATGCTTCG
TGGCTTCTGCTGCTGCTTTGTGGATGGTGGAAATCAGGCGCATGGTGGGGCTTTCGTT
TGACGGCGATGGAATGGATGAATTTTTCATAATGTTAAGCTGCTGGTTGAGGGAAATG
ACCTAACAGACGAGCCTTGAACTCAGCTATGCGGGCAGCATCTCCTGCAGGACGACCT
GGTGTCTCGTCTGCAAGAGCTGGCAGCAGCTCACGAGGAACTGGCAGAAGAGAACGAG
GACATAGCAGAAGCTGCACAAACAGAAGCTGAGGAGGCTCTAGAAGAATATAAAAGTA
GGCTTTGGCTGGCGTTGGCGCTCGCTGCGTTCGTGACATTTCTGATCTGCGGCGTCTT
GCCCATCACAATCACTTTAGCTTTTGCGTCTTTCTTTTGTAGTTCATTGATTTTTGCG
AAAGTAATTCAGCACCTTCAGGATTTCACGATGACTGCGTGATGGGGTTGGCTTTGGC
CTACGCCAATTCGCGTCATCGACCTTAAATTTTGGGAAAGGTAGTGCCCGTCTCAGCA
CTGGCTGTGGTTTCTCAACGTAACGGCAAAGCAGCGAAAGTAGCCCCAATGCGGAAAT
TCGTAACCAACGTAGCCGGGAGGCGAGCCGATCAACTTAGCGACAGAATGCTTTTCTT
GCGGGTGACGGTCATTTCATTTTGAGTCAGTGTGCCTGTTTTATCTGAACAAATGACT
GGTCGGTGGAAGCTACTTGTGACCTGACTGGTTTGATTATCGCTCGTAAGCTTGGCCT
GACTAAGCCACCGACATTCTGGGGATCGATCTTAAACTTTCTTAAAGAAATAGCTGGC
AGGCGCTACATTGCGGTCCCCGCGCAGCGCACGGGAAACCGTCATGCGACTCACACCT
GAGGTGTCGTGGCGCGCCGCAATCAGCCGGGGGCGTTGCCGATCGCCAGGGGCGTGGC
CATTCAAGTGCGTCTTTAATCTATGACAGTTAGCACAGAGAGTTTGAAGGTTGGATGG
CCTGTTCCAAGGTTAAATATCTCGAACGACTTTTCATCTTTTACATTAATCATTCTTT
GCTCCAGCCGTATGTCGAAGGGCTTGGACAGCGACGTCGTGTCGAAGCAGAACAGCAG
GATTCAAAACTTAGTTAATGAGCTAAATAAATATTCATATGAATATTATACATTAGGT
GGCGACCAACACGCTGCACGAATGGCAGACTGATGCTCTGCGTTCATCGGCTGCGAAT
GTTTGTGTTGTTGCCTGCAACAGCATTCACGTTGCTAATGTTGGTCGCAACAGTAGTC
GAATGAACAACTTCCCCGATCTTCTCACCAGTGTGCATAGCTTTGGCGGTTCTCATGG
GGTGCGCTTAAAGAAGATGTTGAGCTGTTTTTGAATACTCTCAGCACTAAAAACACCT
CGGCGGTGTCTGGGTTGAGGCGATTTGGGCCCAGCAACATTTCAACATCATCGATCAG
TCGATCTGTGAAAGTGCAAAGTTGCCTTTCGTTTTAATCGACATATAAACCTTGCCGT
CATTTCTTTTGATTTTCTTCCAATCGAATGGAATAATTTGTGCCCCATCGGGCATGGT
AAGTCGGCACACAAGGCAGCGTTCTGGCAAGCCCAAGGGCCAGCCCTCAAGAAGGCCG
GATATAGCTTTTGCATTTTATGCAGGTAACTTCCTGGGTGTCCTGGGTTAGCAGGTAC
GTATGCAGCGTGGAAAAGACAAGGTGTCCTGTCAAAGAGGCTTCTACGGCCATGCTGG
GGGGCAGGGAAAATCCCGGCTGGCAGAAGCGATTGCCGCCGGTGATCTGAGCCAGAAT
AATTCAAACGGCGGCTCATGACGATCGATTTTCACTGCGAGATATTCGGGCTAAAATT
AGTAGGTGGGGAAAAGCCACAGTTGAAGAATTGTTATCTACAGGTGATCGAAGTTTAC
GAAAGCTGGTTCAGTGGTGCATTCTGAAAGACGTTTGTAAGTAATGGCGAATCACGCG
GAACGACATGCTCAACGGCGAAGTGATCCGCCTGGACGGCGCCATCCGCCTGGCACCG
CATTAATAGTAAGTCACCTTCTAATTTTGTAGAGAAAACTAGACTTGCAAGTGGTTTT
TGATGGCGATAGCACTGGCCGGCGCACAGCCAGGCGCAATGCCATTTCCTTTTCCATG
GATATTATCCAGCGGCACCGCGGAACGGGAGTCAATCTCGAACAGAACCGCCTGTTTG
CCGGTATCTTCAATATATTGATAGGTGAAATCAAGCTCGCTATCTGCTTGTCCTTGAT
CACCTCCGTATTCAAATTTGTTGTAAATCTTATCCAACTGATTTAGCATGCTTGCCGT
GGTGCGCTTGATGTTCTGGCGTAAATCGTTGATCACAATCTGCGATACGTTGAAATCG
GAGGCCGTTGAAGTTCATCCATGGACAGCTCAAGTAATTAAGGTTGCCAAAGAAGTTC
AAAGCTTGACCAAGCAAAACGCGATTTTGTGAATGCAGTGCTTCGCCGCGAATCTGGT
GCTTTCTTTCAGTTCCTCTCTCATTACTTCTCTGTATATATATTTGCCTCTATTCCAT
TTCCATCTGGGTGAATAAGTACACGATTCTTCTTGCATTGGGGTGTTTATAACATCGG
ATGGCATGACTGACTTCCTGAGTAAGCACTATTACGCTGATTACATAATGACTAATCC
AAATCAGAGGCACGTGATTTCTTGTTGAGAATGGACATCGTTCAGTACCACAGATTTT
CTGGTCTTGGAGATGCATTTGTTTTAAAGCTCAATACCAACCTATGTGGAACTATCTC
GAGGCCGAACAGACGCTGGTTAGGGGAAGATTTGTACATGCCGTCGAGCATTAGCGAG
GTAGGTAAAGTCTGGCTGCTGGTGTACAAAAGGGCAGTTGTTCCCCTTCAGAAGAGCT
GTATACACACAATGCAAGGAAAAGTTTCAATTGAATTTACTACCTCCCCTACTCACTT
TCTGGACCGAAGCGGGCTCCCCGCTCAAAGTCTTCACCGAACAACAAGCCCAGTCGCT
ACCATGTTAGAAACGCGACCGTCAGAACCTAAAACTCGACCTCGTTTGCTCGCCAAAT
TGGGATATCTGCCAAAGATTGAGAAACACCGAATCCTAATCGATTTTTTTGAAAAAAT
AGTACGGAGGACTGACGATGACCATCGCGAAGAATTCTCGTTACCCACTGATTTTCCG
CGTTTAGACGACCCACATCATGGAGGCTCCTCCATACAGATAGTACATATAGAGCCAC
TCATGGGTAAGGTGTCGGCTGTGCGACAAACTCACCTGGCGGCGCAAGGATCGGCTGT
CATATCTCCATATTTGCGAGAATTAGCTTCATCAAGGGCCGCATCAGTTTCATCAAGG
GCGACACGCGTGTATGAAAGCAACGCCGTTTTGCCTATTTCCTTGGATTTCCGGTATA
TCACATGCTGCTGGCGCTCGATCATGGTGGCAGCCTGGGCCAGTGCCATCTCCAAGCC
ACCGTTTGTCCCAATACTAGAAGTAAGAGTAGGAGTGTTTGTAGACGCATTCCATGTT
CCTCTCCCGCTGGCAGAACGCTAGGCTTGTGCTCACACCGAGCATAAGCTGACAGCAG
GTGTTTTGACTATTGTGTCGCTCCTTATGCTGCTACTATAGCACCTTACATCGCGATG
GTGTTTCAACCACCTTGCCATACAGTTCGGACGATGAGGCCTGATAAAACCTGGTGTT
CTGGGGTGATATGCTCTCCGAGTAATATTGCTCGTCCATCACCAAGCATATTGAAATG
GAGGAGCACGCCGTCGGTCTCGTACTTGATCCGCGTGCGTGGGCCGGAGCAGTTGTCG
CATTACTGTATCTTTTGGGAAATTTTCTTCGTCTTTAATCTTTGAAATTTCTGAGTAT
GATGGGTGTTGAATCCCTTGATTATATTGAACTATACAAATGGTATGCGCCAGGTGGT
CCCAAGCTACCTGACCAAGCGCCAGGAAGCCGTTGAGGCCATGGCCAACATCCTTCAG
GGTCAGAGTTACGATTTGCCCCGAGTAAGAAGGATCGGTGAGGATTCCTGGTAGCCGG
TGGAGACGAGAAAACTTATCTATGGAAGCAGTTACCTTCAAATATCCGTAGTGCAATC
CGCATCGAACTCTCTAAATCTGCTCCAGTAGTGATTTACAAAGAAACAGTCACCGCCC
TACCAAGACCCTAATATGTAAATGCAATCAAATGATACAAGATCTAACTCAATTAGTT
AGAATCCAACTTATTCAGGAATAAATTCTATAGGTAAACAATGGGTTTACAGGTACTC
GATGGCTTCTACGCGGCTGTTGTGTGCACCGATATAACGAACGTAGGCATGGAAAGGC
TCCGGATGTGTGCTATTAACAGGCATCGCGTCGCGCAGACTCGCGTCCGCACGACCCG
CAGGCCTTGGCTGCTGCCGCCGAAGGTTTTTCCGGTGCTGAAATCGAGCAGGTAATTG
ATTATTATTTTGTCATGTTTTATCATGAGTTGGAGATTTGACAACTTTTAAAGTTGTC
TGGCGGCGTTGCGGAGATTGCCGCGGTCGAATTCATCGTGGGCGTTGGAGAGCGAATC
CGCGGAATGAGTACACGTGCCCATGTCCCAACCCGAAGATGGAATCTTTCATGCCGCG
CCTGCATCCTGGTACTAATTTAATAATTCGGGCGGTTGAGGATATCCTGATCGACTTC
CTTTATACCTCTCAAATCGGCTGGCTTCAAAGCTGTAGCCAAGATACCACATGAGGGC
CATGTGTAGGTTTTTCGCGGGACTGCCGCCACGATCCTGTCGATTTCGTCTGCGTCCT
GAGTTTGGACCTAAGGAGCAGAGCCCGGTCATGCAGCTGCAGACTGGAAGTGCACTCA
GAAAACCCCAAACGGCGCAGCCACCGCACGCTGGTGGTGTTCTGTGCGTGCACAAATT
TGCCAGTAACTGAGGTTCAGGATACGCCGAGCGGTTCATGCCTGAACCCATCCGCATC
ACTGCGGTTAGCATCACTCGTCACCTTTGGTCTTGGACTCGGCGTCGATAGCCTTTGC
ACTCGACTTGCGCTATTAACGTTGGCGGCTGAAATATTGCCGGTGGCTGCTAGTGTTG
TGTTTTTCCATCGCCGGCGCCAACTGCGCAGCGATCTGCGGACCTCACTGGGGGCATC
GCCGCATGAGATATTCGTAGGCATCGCCGAGCAGGTCGTCGCCGTCGGCGCGGTTCTT
GAAAAAGCTAGTAAATACATTTAAATATGAAATTCCTGGTATGAAGTATACACCTGCT
GGTCTCACTCTCAATCCGGCCCCAGCCAAGGCGGTCGTGTACTGCACATACGAGGGTT
AGTCTTTATTCTCTTTCCATATGATATCTATATCTGCCTGCCAGATCTCTCTAAATCT
ATTTGAAATTTGAGAGTGACCATATCCATCAAAATGTCTAACTAATTCTTTAAGTGGG
GCTTGCATTGTGTCGTAGGGTATAACTGTTGTTGTGTATGCGATAACCTCATGCGTTG
TCCACCCAAGCTACTGCACCGACTTCTAATGACACACGTACTTTTCCCTAGCAGACCT
TCTGTATTCTTCATTTTATACGATTGAGTATTGGTATAAGGGCATAACTAATTTCAGG
CAATGCCGCACTTGCCAATCAATTCTTTCCCGCCGCTCCCATTGGACAGATCACACCT
GAATCTCTTCCCCGTTTATTATTAACGCAATAACTGTTCTAAATTGTGCACTACGATC
GGACAAGATGATCCATTGGGGTACCAAACACACAACGGGAACAGTATAGCTTATCCTT
GTGTGTGTGTGTGTGTGTGTGTGTGTGTGTGTGTGTGTGTGTGTGTGTGTGTGTGTGT
TACTGGTGCACAAGGAGTACAAGGACCACAAGGCATTCAAGGAGCCACCGGACCTACT
ATGAGCGCCGTCCGGAAGCGCGTGAAGTTCCTCCATGTCCGCGGTGTCGAAATTGGAC
GGGTAGTGCTGGACTGACTCTCGGATTCTGTCTGCCGGTGTTGGCCGGTGCTGCCGCC
CACCCTCTCGAACATTTTATAAAGGTAGCTGTCCTCGTCGGGTGGGTTCGTATCCATG
TCACATGCTGCTGGCGCTCGATCATGGTGGCAGCCTGGGCCAGTGCCATCTCCAAGCC
TTGTATGAAACACGACTCATATTTTGGGCAATATATCTTTTTGCCATAGTATTCATGT
GGTCGTCTTCTGCCTTGACCTCTTAACATGGACTTCAAGTAAAGGTCCTATATTCTTC
TGCGATCTCCGCAGCATTGGAGGCAGGCGTGAAAACATGGGCAACCTTTTGCTCAACA
AGACCTTGCTTTATTAGTCGCAACAGGAAAACAACAGATTGTCAGAAGTTGAAGCTTT
GCTCGTCGAAGCTTCCTTGACGGCAGCGATCGCGTTGGCATCGTTCATGGCGGCAGCT
TGCTGCTATCGCCCTGCCTCGCACTGAGTGCGAAAGACGGCTCCGTGCGGGTGGCTGT
TACAGAGGCAAATGGGGTTTTTGATCCTGAAGAAAATATTGATTTTCTAACCAGTATT
GCTTCACCTGCGCTTGGTCGCATCCACCTACTGAAGTCCAAGTATCACTCGGAGAAGT
TGTTCCAATAGCCCGTTTCTACGTCATGCTCGAACACTTGCTTGGTAGTCTTATCCTT
GTCCGTAACCCTGTCCAATACCGCGCAACGCAACCAGTTCATCAGGCGTGGGGGCCAA
AAGCCAGCACTTCCTCCCCACTCCCTCATCCCTAACGATCAAATGGTCCCTCCACGTG
TATAAATCCAGTATTTAATGCTACGGATAAATCAGCTATAAATGTATCTTCAGTTTCT
GAGCAGTTACCCGTACTGGTTACTACACCGGCGGCATTGGAGCGCCCCAACCTGATTT
CAGTTCCGCCTCCAGCTCCTGTTGCCGTTGGTGTTACGCCGTCCGGAAGAACGATTGT
GAATCACAACTAAAAAAGAGGTCAATAATGTATCATTGTGAATATCATCATCATTTTG
GAATAAAGTTGCCGGTTATGGTATCCGGTACAAGTCACTGATGCCACGCGGGAAGGAC
CACCACCTTTGCCACTCAAATGCACGTTTATCTTGAATCCGTGATCATGCCAACTTGC
CGCGCTGGGTGAACCACGAAGAAACCACCGTCGAGTGGTATCGCGCGTCGCTGGAACG
GAGCCGACCAGGCCGCGCAATACCCGTCCGCCGCGCCTCTCCGCCGAGCAAAAAGCCG
GTGGCCTGTGCCTGCATCTTTAAACGCATAATACTAGCGTTGGTTGGCTCAAACTCAA
CCTGTCTTATCCTTCTATTCCATTATCCTTTAGCCCATTATTTCTTTTTTCCTACTTA
TGCAGATTGCTGTGCCACAAATCCAGCCCCGGTGGCCTTGAGTGAGCCAAGATTCTGC
CGTTGGTGACAACTTTCATGAGTTCTCACAACTCCACCTCGATGAGATGATTTCATCT
GATAATCTAATGCTTTTACTACCAAATGGCAAATAATAATAAGCAGGAAAGACTTATT
CATCGAGATCACCGAGGCCACCATCGGCGAGGACGAGACCGAAGCCCAGCTCAGGATC
ATCATCAAGTGTAGTAGATGAAAACTATTCAAACCATATCATATCGTTATTTTTCCTT
AATAAGTAAGAACATTGGAAATATAACAATTACTGATTCTTTTAATGTATCAGAAACC
CATGCCGGCCTGATTGCCGGTCTTGTGGGAATCCTGCTCGTGGCCGCCTACATGATTG
TAAACAAAAATAAACGTAGCCATTCTATCTGAAGTTGGTCATCCTCACAGACAACTTG
CGAATTGCTCGTTAGTCATTGTTGGTTGGTTCATTATTATTCGGGTTTATTGTTTCAT
TTGAAGTTTTTGGTCTGTATTGGTTGACCATATATCTGCTTTAAGAGTTAGTTTGTAT
GCGTGCCGTTCCAGGCGCGCGTCGACGTCTTGCCCCGTTACGCCTAACGTCGAGGTGC
CATTCTTGCCTATTAGTGTATAATAGGTTCTGTTGAGTTGATAAAGAGAGATAAAAAT
AAGGGCCATGATGGCCTCGGCACGATCAGGACGGCGGCGCTGGATGGCGGTCACGCAC
GACCTCGGTCGGCAGGAGATCACGGTCATTTCCGAGCAGGCGTACGCGCAGACGGCGC
ATATCTGGTGGTAGGCGTTATGCAGTGGAAGCAAGGGTGAGGTTAGTAACGGGATGAT
GTGAGCGCGGACACTGCTTCAACAGACTTTCCGAAAACGTAAAATAGGCGACTGGTTT
CTATACAAATACTGCGGTATATTTTGCCATCATTGCCATAATAAACTCCTGTCTGTCC
GGTTACTGACCTTGCTACTATCAACGCTCTGAAGACCGGCGCTACTGACGTAGTCGCT
CGGGAACACGCTTCGTCAGTTTTCCGCCGACAGCGAGAGCGGGCGTAGCATGGGTATT
GGATACGAATTTGCGTGCGGATGCGTTCGTGCATGACTGTACTACGGGTAGCACCACG
ATAGGTGGTTCCATCAAAATTAGCGTTGCCAGTGGTGAACGCGACTGATCCATTTCGG
CATATCAAAGGCGCACTTGGCGAAAAATTCGCACAGGAAAGAGGCCGCCTTGATGTCG
CAAGCAACCGCTGGATAAATGTAAATTTTGTGGGCATAGTCAACTGGTGTTGTGCCCG
CGTCAACTGCTTCTTCAATTGGAACTTCAATTAGTTTCATGACCAGAACTTCCACCACC
ACTTTGAGGCCAGATAGTGTTCTTTTTTGTCACTTTCGTCGTGTTATTATCCGCTATTG
CAACCACATACATGTACCGGATTTTGCAAGATCCTGACCATCGATCATTTGGCTTGAAT
TCGAGAAGGCGATCAGGGAGATCGCCTCGAAACGTGAGTTCGGCATCGGCGACCTCAGC
TCGAGAAGGCGATCAGGGAGATCGCCTCGAAACGTGAGTTCGGCATCGGCGACCTCAGC
CCTGAACAGTTCTACCAGGCATAACTTTGTCGTAGATATTTACAGTCTTAGTTGTATTG
CATCAACCCAGTTGGCCTAACAGGTTCAATTCTTGGTCTTCCAGTTGTTGTTGACCCAT
TGTTCTGCGACTTCTTTCAGTTGCTTGCCCGTTACTCCAGTCTTTGAGTACCTTTTCAC
GGAGAAGATGGAGCAACACATCAAATGCTTGAAGATGTTGCACTAGCAAGAGTAATTCC
CTGTCGACAAGCCGACGGGTCCAGCTTGAAGCCGGCTTTCTGGTGGTTTTAAAGTGCTG
CCCTTTAAAAAATTTCTCGTTCAAACTACTTACTGTTTTGTAGATACTGCTGTGCTCTA
CAATCCATGCCGCCTCAATCAGCCCCTCATAGTTGGTCTGTACGGAGATGGTCATCGCC
TATCATCAAGGGGATTTGTGAGCCGTTTCCTATCACAATTGCTTACCACATGCCTCTCC
CACGAGAATTTGCCTGGAAGGTGCGCCTTCAATTGACTTAAGTACCTCAGAATGATCTT
AGGATTTGTCTCCGGCATCCCCGTTCTGACTCCTGACTTCTGAATTCTGATTTCTGTCC
TACTCTGTCCCGTCATTAGCGGGAGGCAACCTTATTTCCAATTTCAGTCCACCTGACTA
TGTGTTGTTCATGCGCCCTTCTTTTGATCGTCTCCCTGGAAAGATTGATTTCATGAATC
TGCCTGACTCCTAGACTGAGAAGAACGCGGGCACCGGGGTCTCCGGCTCAGCCTCGCGG
TGCAAGTGGCCAGGAGCAGATCGTTCGTCGTTGGCAAAGGTCACAATGGAGGGATAACT
CTTATGGCTTGGCGTTCCGCCTTGCGCAAATCTGGTCGCCGCCGCTCGCCATGACGCTG
CATTACCCAGCCCTACCGAGTTGTTGTAAGCAGATTTCTGAAACTGGCTAAACGGGTTT
CTCGTACTGTTCTTTCAGAACATCGTATGGCAGTTTTTCATCCATAAACAAACCGGTGG
CAGTTTTCTGTTACTAGCGAAGTCAATATAAGCTACAAAATGAAATACTTTCACGGCTC
GATGTCCTTGAGGAGGATCACCGGGCCATCTGCGCCGAGATGAGGGAAAGGCAAGCGCT
GGGCCAGCCATTTCATGCCGCTGCCGCCGAAGTTGACCTGAACCCGCGCCTCAGCGCCG
AAGGATTTGTGACGGATGTGTTTAGTCAACAGTCGGTGCTATTTGGATTAGCTGAAAAT
TGATTTCGATTTCGCCGGTCGCCAGTTCGGGATTCGATTTCTGACGTTTGATCACTTCG
GATCAAATTCGATGCCCTCCTGCCGGTAAATACCGAATTTGATCGTCGGGCCCACATCG
GATCGAGATTGGGCTTCTCATTTGCGTACTGCGTTACTGATGGTGAGGAACAGGCAAAC
TAGCCACAAGCTTGAAAGCAGTGTGTGACAATGAAAATGAAATACGTTCAGGCATAAAT
GACTTACATTGCTGATCGAGGCTACGCTTCTTTTGCCGTATTTGAGCAAATTACCGCGC
GGCAAAGACAAAATTCCCATCATCAAAGTGCCCAATCGACAAATGGTCGTCTTATAAAG
CAGCGCCCAATACTGGGTCAATAAGAGCAGATTTAGTAGCTCCAGCCAAAGCTGATTCT
TATGGCGTAAACGTCAATGATGGCGACCCAAATACTGCCACAACAATCTGGCAAATTCC
GGTTTATTCTCCCATCTATCATTAATATCAGACGCTGCTTTTTTAATATAAGAACCAAG
CAGTTTTTCCAAACGCTCAATCTCTTCGTTGGCAAAGCTCACTTGCTCTTTTGCAATCT
ACCTTGCCTTTGAGAAACTCAACAATGGTGAAGAGTTCGCAGGTTATAAGTTGGTTCAT
CTCACGGAACCGGCCAGGTAGCATGTATTTCAGGCGAAGTGGGAAACGATCGATCAAAG
GATCGCATCAAGGCCGTCATCGCCCACGAGCGCGTCCTCCGCAATCAGCTCGACCGCGT
GTATTAGAAGCGACGGTATTTTCGTCTGACATTTTTAGTTCCTCCTATGTCTACATTAT
GTCAAGTCAAGGCAGCAGACGAAATAGAAGGTAACACTTCTAAGTCGGCACCCTGGGAG
AGAAATCTTAGAAGTAAAGAATCGAAAAGATTGGAAGGTTAGAAGTTCCTCATGAAAGA
AAATCTATGTTAAAATGGGACAAAGATGGAAATCCAGAAAAACTTCCAACAACACATGG
TACGTGTGTATTACACATCATACATCTGATACTAATAATTCTCCATTAGACGATTTGTC
CCGAACGGTGGCGGTAAGCATTTCTTGGATGCTAAGGCTTGCTGGAAGGACAATAACTT
AACAGGTCGGGGAACACGTCACGCATACGGCCCTGACGGACGGCAAGAACGTTCTGCAT
TGTCGGTAACCTGATCCAAGTGGGCGTTGCTTCCCACGTCCGCCGAGGCAAAACTAATC
CACCGCCGCAGTCTCTACCTCCTTGCGGATAGGCTTCAAGTGCTCCGGGTTGTCGATCT
CATCTTTTTCTTATCTTTATGACATCCCCTAAAGTCAAAGCTGATGATTCTTTCTTAGG
GTATCATCGTGTACGGATCGATTCGTGACTCGGTCGCAGTTTCCAAAATTGACATTGGT
AGCGTTAAGATATGAACCATTGTTTAAATTCCAACACTAACTAATGTTCCGTTGTAAGC
GATCTCCCCGGCGTATTCGCCGGCCGCGCCATCGCACGGCTCCTTGCAGAGGACGGGAT
GGTTCAATACTCCGGAAACAGAATCTCTCGTGGTGTCTATCATTTCCCTACTCCAACGG
GCGTGGCGGGCTATTCCGCAACGGCGGCTTTTGTGTTCACAGTCGGTTTCGATTGCAAT
CCGAACGGTGGCGGTAAGCATTTCTTGGATGCTAAGGCTTGCTGGAAGGACAATAACTT
CTTCGAATGAATGCCCTTGTTATTGGGTCGTTTATTATTGACGACTGCATGTTTGTCGG
GCTGGCTGCGATTCGGCATCAGACGCCGGACCGGACGCCTATGGATTTCGGCGGGACGG
TTTCGTGGCACTGGGTTTTGTCGGTTTAATCCTTCTCGCATTGTGGTTGTAAGCGCATG
CGAGACTCACGTCGGGCCTTGAGCTCGTCCATCGGATCGGCGGCAGTCTCAGCTGAGAC
TCTGCGAGTGTGGCTGCACCTACCCCGGCATCCGCGTTCTCGATCTCTACGAAGAGGAT
CAACCAGCACGATCTGGTTCACCTCTTTCACACACACACACACGCACACACGCACACAC
AATGCATAAAGAGATTTTTGATGAACATATGAAAAAGGTTTTTGATGATGCCATGAAAT
CATCGTGGCCAGACTCAGCAGGATGGAGTGCCCAAGGCAGTGTCGGTGATCCGGGATCT
TGGTCGATTGGGTTTCATCAGCCAGGAATGCATCAGGGTCAAATGGCATGGCGTCATCT
CCTTGCCAAACGTTTCGATCTTGCGGTTGACGTAAGCTTTGGCTCCCGCTTCCACCGCG
CCAATACCTCAACCGCCGCTGAGCTGCGTAAGACTGTGCTCGAGATTAGTCGCCAACTC
AAATTTCCAAAGCATCGACATTATGCTTATATCCAGCATCCTTTAACGCATCTGAATAT
CCTGTAACATGTACTCAACGAGGCCGTGGGACATCGCCCGCGCCGCACTGGAGGAGAGG
TCCTTGCAAGAAAAAGTAAAATATTTAATTATTGGGCAAGGCCTTGTAGGCACATGGAT
GATTCAAGTCGAATACTTCGATTATGTCTCTTGTTCCGTGTCGGAGGATGGCGGGTTGT
GACTCCTTTTCGTAGGCTCCTACGCTTCTGAAATTGTCGCCTACTGTTTTGTCTAATTT
TTCGTTCTCGCGCAAGGTGACGGCAAAGCGCCTGCGGATTGCCTGCTTTATCAGTCGAT
AGTATGTTTCCAAATGGTGCGTGACGCCATCCGCCACTTGCCTTTTGAAAAACCCCGTT
TTCGTTCTCGCGCAAGGTGACGGCAAAGCGCCTGCGGATTGCCTGCTTTATCAGTCGAT
ACCAACTGCAATATAATTTCCAACCCATCTTTTCCGTCCCAAGGCACACAGGGGATAGG
CCGCTAGTTATAACTTGAGAATAGGTTAATGGCGCGACCAGGTTGGCGGATAAACGGTA
CATTCAGGGCATATTGCATAAAAAATGTTCTTAGGTATTTCAGTTTGTTCTGATTGTTT
TAGGATCTGTTTCCCCACACGTTTTCCCAGCCTCACCCTCAAGGCACACAGGGGATAGG
GCTGCACAAAAGAAACTTGATGTGCATATGAAAGACGTTGAGCAGCGCCACAAGGAACT
TATTGCTTATATTTAGGACTTCAAAAGACTGTATTTGCTCACATCAGTTTTTTTTAGTA
GAGGCCATAGCGCGGCCGGCGCGGCCCACCTGTTGATAGTAGGCGACCACCGAACCGGG
TGTTAATGATAAACGCCCAGCATTGACCACATCATTAGATGATTTCGACACACTTGAAT
GATGTGATTTGGTGTGAATTGATGTGATTCATTCATTGTGAACTGGCGTGATTTAGCGT
CTTCGAAGTGTGTCGGGTCTGCCCATAACTTAATAACATTATAATCGCTAAACGCTTTA
GCCACTAGTCTTTTGTTAGACCACTAACTTTGATCATTGCCTCTCCTTGCGATAAAAAT
GCACACAATACGATCCGTCTGCATAGGTACAAGTTACATAGTTTGAAGTTACTTTAGCG
AGACGACATGGATGACATGGATGATGACATCATGCCAAGCGAGCAGTTTATGAGCCGTG
GGCAGAAATGAACTACGAGCCTAGAAAGTCTAAGTGGTTAGAGTACGCAAACCTTGCAC
GCGTCCAGTTTCCGCGCCCGTGGTTGGCAGTGGGTTGATCCGCAGAAGGAAATCAACGC
GGTGGGCAACACAATTACATTCTCAGCTGCCCCACCCAGACGGTACAGGCAATATACTC
CCGGCAAAAGTGACTGTTTCTGATGATTTTGCCGGTAATTTCTGGTCTCGGTAGTTCTT
ACTGCCGCGCTCAAAACAACTGGGCCGGCACTTGTAAAACCTACCTCACCATACGGAGC
AAGGACACGACTTGTTCTGACACACGGCTTCGTTTTCGTGCACGCAGTTGGATAGGAGC
CGGCGATTTCGAAATCGTTAAATAGTCCGCGTCGCGATTACCGATAACCCATGCAATGA
TTCGAGCAAATGACCGGGCTCCGGCGGAGCGACCTGATCGGTAAGACAAAGCGCCAGGT
AAACTGAATGTCGCCGGCCACCGATTTTTGTCGTGCAACATGAGTGCCAAATACTGGCC
CCACTTCTTGGATATTGTAATGTATTCCCAAACGGTATGTATTCCGTTCTTATTAATGT
TAGATCGTCCCAGCGTTGAAGTTGTGTACCAGAGCGAGGTGAGTAAAAAATTGGATGCC
TGTTGCGCATCGAGGCTCTGGCAGTTCTTCCCTTGCCGCCAGTAGGGGCTTGGGGTCGG
TGCTTGGGGATGCTAGAGGCACAAGAAATGGATTCAAGTGTTGGCAAGCGCAGGCCGAG
ACCAGTCCGGGATGTTCATATTCGCCCCTGTATTTCCCTGCGGCTGAACGTTGCCCGCA
TACCTTAGCCAATGCTTTAAAACGCTTGCCTGATGGGTTCTTAAGCTTGGTTAGCTCAT
CAATTGAAGGTGCTAAAAATGGAATGCCCGTCAAGGACAAATCCAAAAATCAGCAACCG
TGGGCGTTTATTGCGCTGGCGATCATGCTCTTTGGAGGCCTGCAAAGTCTGTTCCTGGG
CGTCGGATTGATTGTCACCACGCCATTCGCAACACTTACTTTCCCAGTAAGATCGGTGG
CAAGGCGTTCAGGGAGTACAAGGCGTTCAGGGAGTACAAGGAGTTCAAGGCGTACAAGG
AGCCCGCAATAATAACAATGCCGAAAGATCGTGTTGATGCGGCGATTAAAAAAGTTATT
GAATAGATTTAAGTCCCAATAGTATAATACTTACAAAACAACATTTATCTTATACAAAT
GTGTGTTGAATGCTGGTGATACTGATGTTGCTGCTAATGTTTTGATGTTGAATAATACT
AGCTGACGTATGCGCCGAATAATTTGCTTCTATACAGTAATACGTTCACTAGTGGCGGC
CAATAGAAATATGAAGATTTTAAATTTATACGCTTGTTTAGGTGGCAACCGTTACAAGT
ACTCAATTTTCATAAACCAATCAAATTATACCGGAGGTATCGAGCCAAATGGTTTCGAG
TACTTTATTGGTGTAGCTGAAAAGTAATGCAAAGGTTTACATTCCTGAAACTTCAGACC
CGGTTATCGCAGACTCCTGTGAGCCGGATATCGAAATTTCTGAAGAGGTATAATCATGG
AAAGGTTGCGGTGTGAATCATCATGTAAGCTGAGTCGAGAACAGCCACCTCATGTGCAT
TGCCTGACTCCTAGACTGAGAAGAACGCGGGCACCGGGGTCTCCGGCTCAGCCTCGCGG
CTCCCGGTGGACACAGACGAGTATTGCTACCTCCTCATGGCGGTTGCGCGCAACGTCGG
TGACTATAGCATTGATGACTTAGAAGCAAGCGACGAATACTTTGACAAACAAGAGTATC
CTCCCGCGCCTAATTTGACCCCACCAAAATAACGAATGACGGCGACGCATACGTACTAC
TCTCTGGGTTACCCTCATTGATAACCTTGATGAACTTATTGTTGCCAACTGGCATAATG
TCCGCCATGCACGAATTCCAGAATCGACGCGCCACCACATCATAGGCTAACTGCTTGCT
AGCTGGCGTGAACATAGTTATACCGGAGTCCACAAGATAATGCTCCATCCTCACGTTCT
TCTGGCTCCTCGCTGTCTGCGGGCATGGCCACAGGTTTGGGAATATCGTTGCGGTAGTC
GTCGTCAAATTGTATTGGGCTAGCGATACTTGGCAGACCCTAATTAAAAAGGCGGGCCT
GCAGCAAGTATACCACCAATATCAACCTGGAAATGAATTACTGGCCGGCGGAAACCCTG
CGTTTCGTGTAGATGAAAAGCAGTCGGATGTCTATTGGTTAGCTTGGGAAATTACACGC
GTGCGAATCTGGTTTCACTGGTCCGGTCCTTGGGAAATGGTCAGTACCAGCTCGACCCC
GAGAAACAAAGATTATGTCCAAGAGGATTAGTTCAGGAGGTTGGCGCCCATGAAATCAT
GAATAGATTTAAGTCCCAATAGTATAATACTTACAAAACAACATTTATCTTATACAAAT
AGAAAGGCGAGAGCGAGCGCAGGTCCAGCGTGCCCTTGCCCGAGGCGTCGATCAATCGG
ATGATTAGGGTTATTCTTATAAGATTCAGAAATAAACGTTCCTTTTATATGTTTAATAT
GAGGCCGTTGGCCAAAGGAGATAAAAATGACTAACACTTTAGCGACGATTATTGTAAAA
GACAAACCCTTAAGTTATGGCAGACAAACTCAAACTTAGTGCAGTAGCCTCGACCACCG
CAGCTGCACGGAGTTCTAGTGGCTCCGTGTCCAGCATCCTGATCTCAAGGTCAGTCATT
CCGTGTCGGCACTCCTGCGCAACGTCATCCTCACGACGCCCGGGATCGTCGGGCTCGCG
TGATTTGATTTATTTAGGATAAGTGACCTCTGGTAATTGGCCAGATAAAATTATGTGGT
CCCTCTCGGCGTTTGTGCTCTGGGGTCGTGCCAATAAGGGTACCCACTCACGGCGCGCA
GAGCGTCAATGCACGAAGAGCTTGGGGCACCTATTGAACTGACGCCTACTGAGACTAAT
GGATTAGTTTTGCATCTTTGTTATATACGTACTCAGTTTCTAACCAATTCCATTCAACA
TACAGAAGCAGAACAAGCTAAGGTTTGGGTGGAAGATGAGTTAACTTGGTTAGATGTTT
AATTTTCGCGGTAACGAAGCATATCCGATTGCCAACCCGAGATTGAAATGCCTTCCCAA
CTTGAGACTGCTGCACTGGAGGGCGGGAAGGTGACAGCCTGCGCGGGGCGGTCGTCGCT
CTATATATTATTTTTAATCCTATTTCACTTTTAAGAGAGTGTCATCAGTTTTTCGCAAG
TGTCAGTATCGGTGTGGATTACGACAAATCTAGCGAAATGGAATTGTTGCCTTAAATTT
CCTCGTCAAGCTCGCCCTGCTCGATGCCCATGCGCAATGCTTTGCGCTATGCACGCTCA
CACCTAAACCTTTCATCATCTCAGTCCATTTCTTATTGATGTCAATATATGGACTGTAT
TGTTGCGCGCCCGCCAGTTAATGAGCTAAGAGCAGTTGAATATTTGCCCCATTTCGGCC
TCGAGCATCAACGACTTCGCTAGATCAGAATCGGGATCCAAATTGAGAAAATACACCTG
GTGCCTTTCTTTACTTCTTGACCTACTTTTACTGGTACTGATATAACATCACCTGAAAC
GCCGAGCATTCTCGCAGTTTCTAAAACCCGCTCTTCATTACCTAGCAATCGAACCCGCG
GAACAAAATGGCCGGGGACCGTCCCGAGCGCTATCTGAGCCGGTGGCAGGCGCAGGCGT
CTTCATCGTTCACGCCGATTACCCGTACATGGGCGTGAGTCCTGACGGACTGGTGGGCG
CGATCGCGCGGCTCGGGATCACGGGCGCGTTCGACGAAGCGCGGATCCAGATCGATCGC
AAAAGGTGATTTAGTGGCGACTGCTGCCGAAGCAGCCGCCGACAAGGCCGACAAGGCCT
GTGCGGCCTAAGCGCACATCTGTCGCTGCCATGCTGGCGCGACGCTGAATGCGCCCAGC
TGCCGCAAGTGCGGTGCCGACCTCGGCGCGCTGAAACGGGCCCGAGCCAAGGCAGCCGG
GTCAACAATATCGCCGCCAACAGGCAATGTTAAATTACCGTCAGTACCAAAAATCCAATT
GCGAGCTGTACCGGAAGATCAAGAACGGGAAGGCCGCGACCAAGGCCGGCTGGAATGTCG
CAGCTTACAGGAGTGAATTATGATATTACAAATACACTTAATGATCTTCTGAAGATGCTT
CAAACAAAATTACCTTGACCAGAATCAGGAAAATGCTATCGCTCAGCAAACAGGAGCAGT
CAATGTATGCTCCTTCTTATTATGATTCGACCAATACGTCATTCTATGTAGATCCTGCTG
GGGCGGAGGGCTTTCCATGACCGGAGCCGAAACCGGCCAAAGCGTGTTCCAGCCAGAACT
CGTGGTCGGATAATTCTCTGGACGCACTTCAAGCGCATCGCGGGCGGCGTGGTGCAAAAG
CTGGTCAAGAAGGCCGACCGAGGCAACGCAACAAGGAAGGGTCCAAGCGCGATACAGGCG
CATCCTCCGCGTTATCCCCGCCAGCCACTGCTGCCCCGTTGGCCGAAACGGCGGCGGTCG
GTTCAGCGTGGCCATTGATGATGTGGCGGTTATCGAGCGGGGCCAGGTGGGTGTCATTGT
TATTTTACCATTCTAAATCTGGAGGAATAAATCCTTCGTATCTTTGCATATTAATATAGG
TGATGTAGCCAGTCGCTGACCCCGTGGCTGGGATGATGCCGCTGCCTTGAGCACCCGTCG
TTCCTTTGGCTGCGGCTTTGCCGAGGTCGAGGTGGATATCCCCATGTGCAAGGTCAAACT
GAGATGGTTAGGATATTTGGGTCTGCTGCGAGCGTAGGACCTTTATCATCTTTTGGCATC
AAGCCGGCGAGATCATCAATCCTGATCGGTTGCCTCCCGCCCCTGTCGGACTGCATGCGG
CGTCATCGTCGACATGGCGGCCGAACAGGGCGGCAATTGCGAGCTGACCGAGCCGGGCCA
TGAGACTTGCAATCTTGGCCTGTTCAACGGAATGAGCCCGGCCAGCCACCTCATGGCCCT
CGTTGGGTTCGGGCATGGCGCTGTATGCGTTGATGATGGGGCCGAACGGCGGCGAGGTGT
CCTGTAATGCTCGTTGTGGCAGGAAGTCTTAGTGCGTTTAGTGTACCTGCATTGATGTTT
TTGCGCGACAATTCATCCGAACCTGTCCAAGTACTACAGCACCACCTCAGTCCAGAGCAC
GCCAACAAACGCAAATTATCGCGTTGGGCGAAAACGAGGTAGCGGAGCTTTTGGATCAAC
GATTTGGGGGCGGTGGCGGTGACTCAGGGCCCGGGTCTCGTCGGATCGCTCCTCGTCGGT
AAAGTATCTGGTCTTTTGGAGGCTGGCTGAGCCATGTGGAATACTTCTGAGCGTGCAGAA
TGCAACAAGAACAGAAACGAAATCCGTGTTTACAGTAATACCGTTACCAGCGCCAACGTC
ACTTCATTATTATTGAAAATAGTCGATAACAATTGTAATTGACTAACCCCTGAGACACGC
GGTCTCCATCGTGACGACGGTGTCCAGGCCGTCCAGCCAGGACTCCAGGTCGGCGTCGGT
GCAGGCTTTGCAACCTCGACCTTATCTCCACCACTCAGATAGACCACGATGTCACTGATG
GATGACAGTTCCGGACGTTGATAGTTTCTACTTCAATGATCCGTTCATGCGTCAGGCCGT
ACAGCTTTACAGTTTGTATCTAAATATAAGATTGCCGAAGCTATTGATATCATCTTAGAT
ACATCATTGGCTGCAGAAAGTAATCGGTCTCCACCACTATAGGCGTTCTTTCCGCCTTCT
ACCGAAGACGGCAGTATTTACGGAAAGTATTTGGAACCGATCAGCTCCGCGGCCGCGATT
GGCGGGCGCGCGACCCCCGGTCATGTTGCCAGTCTTCGCCGCGAGCTTTATGGCCGGTTG
CGGGCTTGTTTTCTGCGGGCTTGTCATTCTGTACAGCGGGCTGATCGCATGAGTACGGGT
GCGGTAAAAGAAATTACAATTCCAATCACAGCAGCCACCAATACCTGCTGACCTTTTTTT
CCAGCACAGTGCCGGCGTGGAACAGCTTGTATTCGCCCTTGGACACGCGGTTGTCGCCGT
GTATATAGAGTAATACCTACAAGGTACACTCGAGTAGAATGCTAGCACCGAACGCACCAG
AGCGGGCGGAGGCTGAAGTCAAAGTTATGCTCCGTGGTGTACTTTACTCACTTTGTTCGT
CCTTTTATAATGGGAGAAATCTATAGTGGACTATATAGATTTTCAAACAGTCTAAAAAAG
GACTAACGCAGAGGACAAACAGTTCCTCACTTTTGATGAGCCCGCTGAAGACAAGGCAGC
TGGACTGAGCCATAGTGACTATTTTTGTCAGCTCCATGGCCATAAAATGACGGTGAGCGG
TCTCGGTCGGATACTAATAAAACATTGCAAGTTCAGATTCAAAATCCTTCTTTGTAAGTT
TGCTAGCCGAGTTGCTAAGTGCGATTGTAAAAGCTCGCGAAACCTCTCCAATTGAACCAC
GGTCCGACAGGACCGACAGGTGCTACAGGTCCAACTGGATCTGTTGGTCCAACTGGCGCC
TAGACCGTCATAGGTTCACGCCGGTATTCAATGAATTCAGCAACACACTCCACAGTGGTA
GCTCGCAAGTTGTCAGGTGAGACTCAGGGTTTACCCCCATCTGAAGCATTTAATTTATCT
GTGTGCTTCCGATGGGCGAGGAAAAATTAACTGCGATCCATACCGCTCGTCTATTACTGT
AAGGCGGGTCCAGGTTGGGAAAGTGCTTTCACACACCTGGACTGGACGACCTATTACGTA
GGCAGCTCTCCAGCCGCCATCATACAGTGCCGCTGCGCTCGTTTCAAAGTCTGTCATAGT
TGGGTTGCAGGACGTCGGGCACGCCGAAGTGCTTGAGCGTGGCGGATGGTTCCACTGGCG
CGGCTCGGCCTGAAAGGCAAGACCGGCGTCCGCGTGACGCGGTTGCTCGACGCCAAGAGT
GACGCAGATTCGCTTGAGCCAGATTATGGATACTCTGATTCTGAGCCGATTGCTAAACCC
GTTTCTGAATATCGGCGCGTTTCTTAATCGGAAATCGACAAATGACATTGCGCTTCGATG
CTCTTGACAACACTTATGACCAATCCAACCTTCCCAAAGTCCTCGAGGCATGCCCGGCTC
GAATCGGCGTTCGTCGCCACCGCGTTGAACCAGTTGGTCAAATACAGCGTCGGCCGCGAG
CAGGACACCGAGACGTATCGCCGTGGGTTATCAAGCTGGTGCAGGACGCGGTAGAGATTG
GGGGTGACCGATCCGTCCGCGACGGAATTCAATTACGGTTGAATATTATGCTACGGCCCG
GCCAGACCGATGGAATCGAGCGGACGCCCCACTCCGGCGTGATTTTGTCCGCCGACCATT
GCACTTCCTACCAACTGTATTTACAAGCCCCAATATTAGGAGCAATGCTTACCCAAGTCC
CCCTGCAAGCCGCATGGTTGCCACGCATGGCCGCAGGCGAAGCGATCGTCGTGCTGGCGC
CCCCACTTCACGACCACCGTTCCCACAACACGAGCGGCTGCGAAGAGGTACATTTGGAGG
AGATTCATTAATACTTAATTGACTTACTCATCGAAATTATCGAATCGAACATCAACTGGT
GCGAACCGCCCGCGACATTTCCAATAATGACCGACTGCGTGGCCGTACCTGTGCATTTGT
CCCCAAAAACTCGATTGTCATACTTTAGCTTGCGAACAAATTCAATTTTTTACATGATTC
GCGGTTCTTCGGGGTCTGAAGAATCCGGAGGATACGAGATCGAGTACCTCCTTGAGATCC
GCTTCTGCGGCGAGGGTCAGGGCATTGTTGTCGTAGGTATTTGCTTGGTGAATATCGCAT
CCTTTGTTTTGTGAAAGATCATGATAATGAGTCTTAAATGACAATCGGATCAAAATAAAT
GAGGTAGGTGGACTGCATCTCGCCGGTCTTGCGGCCGTCCTCGTCGCGGACAGCGGTCCG
GCTAATTTTTTTCTTTTTCGCGCAATTTTTTCGTCAAATCCAGCGCAATTTTCTCAGCAT
GCTTCTGCGGCGAGGGTCAGGGCATTGTTGTCGTAGGTATTTGCTTGGTGAATATCGCAT
TACTTGTTTTTCTGCTGATTGCTTTTCTGCTGATGCAGCATCATATTGTGATTGTGTTGC
CCAAGACAGCTGCTTCGCCGCATCACGAAGACGGAGGTCGCACCAAGACAGCTGGCGTCG
TATCAACTTCACTTGGTTGCGCCTTTACTGGTTCAGCGGGTGTTGCTGGTTGGCCGTTTG
GATGTAATAGGTTTGCCACACTGTCAGATAGATTCCATTTCCACTCAATTTATATATCAG
TGTCGCGTTGACGCTTAATGTCTCTGACCAGGTGCTCGAAGACGTCGGCGACGGAGAATT
CGTAGAGACGCCCGGTCGCCCGAGAACACGAAGTACCAGCGATTGCGCGGAGTCGTCCCC
TGTTTTCTTAACCTGCCTACTACTCTTTCTTTTGGCTGGCATGGAACTAGCCACTAGTTT
GAGGCAAAAGCCATTGTCGGCAATAAAGCCGTCATTAAACGATGCGTTATCAGCACAATC
AATTCTATTTTCTTGATCCATGCTACCTGCTGGGTTGTTACAGAGATTTTTCATACAACG
CGCTATCGACCGGACCTGCAACATCTGGACCTTCTTCGGGCGCCTCATTGTTTTCAATCT
GGTGGACTGATGAAGGGCTATCGACTGATCGCTTCAACGGCAGAGCCGACTTACGACCCG
AGACAGGAAAGAGAGGAGAAAGAGAAGCAGAACAAATAAAGAGGAAGCTAGAAAGGTTAG
CCATCGTATCAAGGCCCTCAAGGTAGCCCTTCTACGGCTCCGATCTAACTTATTATTTAT
CCTCTTGAGCGCTGTAAACCAGCACGGCCACCAGTGGCTAATGAGTCAGGCAGCATCGGC
CGGCTCGGCCTGAAAGGCAAGACCGGCGTCCGCGTGACGCGGTTGCTCGACGCCAAGAGT
GGCGGCCCGGTGGCGCGCTGACGCCGGCGATAAATCCGACGATCGGCTTCTTCTTTTTGG
GATTGCCCCACCAGCTTTTGTCGTGACGCTCTACGCATTCACGAGCCAAGACTCGGGGAG
GCAACTACCGCGGACACGGCAAGCACACCGACCGGTCGACGGCGCTCAAGTAGGCCGATG
AGAACGCATGCGCATCGACTCCTCCGGCAACGTGGGATTGGGACGAGTAGTCCGGGTGCT
GAATCTAATCGGTTGGGAGCACTCAAGTATGGAGCGCAACAGTCTATAGCGGGTATCGCT
CTAATCCATAATGACTTGTCTACAATCTTTTATTACTCCTCTATCAATGACTGTAAGCCG
CTGAAAAACGATCTTTTAAATAATTAAAAAATTAATAATTCCAACCAATGATGTATATTG
GGTTCGATTGCGAAAGCTGTTTGTACTGTCTCTCTATGTCTATGAGACACACACACACAC
AAGCCAGCACTTCCTCCCCACTCCCCTCCATCCCTAACGATCAAATGGTCCCTCCACGTG
ACGTTAGTGACTTCTCGGAGGATATGATGGCAGGTATAGCCGAGTCTATAATCGCAGGAG
GGCTCCTGAAAACGGGGTGATGGAGAAAGGCGAGGGCGTGGCGTGCTGCCGATCAGGCGG
CGTTACCTTTTCGCAGGACGGAATAACAATTGGCCTAAAACATGCTGTTAAAGCATGATG
GACATCTTGCCAGCACTGGGAAAGTTAACAGGCTTATAGCGCTTGCGGCTACGTTTGGTT
GCAAACATTTTTTTGATGAATGCTGAGTAATTCTTTCTTTTAATTCATTCTCATTTTTTC
TGTTTCTAACAGGTTTTTGAGGACTAGTAAGCTGAAAGCCCCGCCACTGAGCTCTTCTCC
GACATCATCGCGGCCCCGAGCTCGGGCGGGTATACCGTGCAGGTCGCGGTGCCGACCACG
AAATCGAAACGTCCAAACAAAGCGCTCAAAATAATCGGCATAAACTCGAACGAGGAAAAG
ATTTCGAACACGTGATTCGCAATGAAGAGTCTTTGAATCGCATCCGCGAATACATTCTCG
ACCGACAAGAAGATTTTAGCTGCATCGACGTTTGTCAATGTTAATGTTGTTGCACCAACC
AAGAGTGTTTAGAAAAAGGAGCAAAAGCATATCTGGGGAAAATAATTACAAATCAAAATT
CAACGCCATTGTTGTTGGTGATCGCGATCACGTCATCGCCGCTGGTGCCATTTATGACAA
CCTTTGTTTTGTGAAAGATCATGATAATGAGTCTTAAATGACAATCGGATCAAAATAAAT
GGTACGTTCTATGTGTAATGTGAATAATGCGTCTTCGAATGTGAATCGTAATATCGGGAC
CATGCTACCGATTATTGTGGATAGAGTATTATTTAGTATCTCTATTCTAATCCTTTATAC
CGTCCGGCCACCACTTCCGCGCCCAAGCCGCTGTAGAACAGGTTTTGTGAAGACCACGCC
GCGTTTGTCGGCACTAGAGCAACAGAATCAGCCTGAAAAGGTCAATGTTGATCAAGAGCC
GTACGCCGTACAACGCGGTATATAGTGCGAGTCGACCTAGAGAATACTTGACGACGATAA
CGCCGCGGTCATAAATACCTCGGTCGGTTAGAATTCGAGTCTCGCCGGCAATGCAGGTCA
GGTGGACAGGTAAAGCCCGACGATTTCATCAATGATGTTTTGGATCGGAGTGTCGGTTTT
TGCAGAAACAAGGGTATCTGTGGCAAAATTTCTAATGGCGACCTTAATCTGTTGATTTCC
AGGACTGATTAAATCAATTGAAAAACAAGGAGGGATAGATAGTCCGCTTTTTGAATTTTT
TAAGTGAGAAATTATGAAAAGTCCTTTTACAGGAAAAGAAATGAAACTTATTAGTGAGAC
TCGCGTCTCGAGGGCGAGCTTGGGGCGCAACTGCTCACGCGGACCACCCGCGGCGCGGCG
CTGTGCCGCACCTAAAACAATAATTGCATCGGATGGGGTGCGTTCATCTTTGGACGATTG
CAGCACCAACACCATCATTCACATCAACAACAGTAACGACTGGTTACGGTGGCAAAATGG
ACTACCTTTTTACAAAATTTAATGCGTTCCGCAGCTTGTGTTTTAGCTCTTGATTCCGCT
AGGGGGCGCGTGGGTCTGGAATCATCGCCCGACGGCGATTGCTTTCGATGGAGCGCCGAT
GTTCGGTTGCGTCTGCATTTACTACAGCAGACGCAAGATTCAACGTAATAGACAACGATT
CTTCGCTGGCTCTTGACCCATTACGATCATTGCGTGGCGCATCTCTTCTGGAGTGATGTG
GAGCCAGTTGTTGTGTTAAACAAGAAACCTGGTTATATTGCTTATCTTGCAAACGGAATG
TACAGAACTATTAAATTTGTTATATTTAGGATCAAGTGATCGATTAAAATCTCGTATGAT
ACCAGAAAATGTACTGTCACACTGCACTACTCGATAAACCCCACTAAAATCGTTTTCACG
GCTGACATTACTAACCAGGTAGACAATGTAATGACTGTCTGGCGTAACAAGCGTAAAGAG
GACTTCAACGGCTTTAGCAATCTCTTGCTGCCTCTGCGCCAGGAACCTCGCGCGCTGGGG
AGTTGCTAACAGTTCTCCAAATATGGTATTCTTAAAAAAAGACGCAGACGAACTAAATGA
TGCGGTTATTGGGTATAATTACGATTTAATTGACACTTCTGCTATCTTTGTAAAAGTAAC
TTTTCCAACACCTCATCACGACGTTGAACACGCACCACATAAAGATGAAAGACACAGGTT
CATTGCCCCCAAGTCCAGACTTTAGAAATGGCTTTGCGGGACGTGTTAATCCACGCAACT
GAAGAAGATGAGGCCACTCGGAGAGCTGCTGAGGCCAAGAAAAAAGCCAAAGAAGCCGCG
CCAGCATTATTAATGCTGTGTTACTTCGATTTCGACGATCCTGAGTACGGTCCTTTGGGG
AGAGCATCTTGCAAGACAACGTGGATGTAAAGGTAATCGCACCGACTATTTGGGACGTGC
TCCGCGTAATATCCGGACTGCATCCCGTAGAATCGCAACCGACGCTTACTATAGCAAATC
TGTCAAACAGGGATTTGATAATTGACAATGCTCCGCTTCCAACTTTTGAAAAGTAGTCTT
GATGACCTTATCCCGAGTGGCTTCACCGCTCTGGCCAATGCCACGTCAGAAGGCACAACG
TATATTGTTGTTGGTGGTATGCCTGTTCCAATAGTTTTATAAATCAGCTCTTAGTTTTAT
CCTCCAACTCTTCTGGCGTCGAGGACGCCAGCCACTTGCGCGCCTCCGACAACAGCCACC
GATTGTCTTTTACGTTGTTTTCTTGTTATGATTTCAATAGAGACCAAGCCGAAAAGATGC
AGCAAAATCAAATCAATCTATGTTGAAACTGCAGAAGGTGAGCGTTTTAAACTTCCCCAT
TTAGCATAATCCAATGAATACATAAGATGATCAAAAATACTATCCTCATTGTGCCACAAT
CGCAAGGAGTTACTTAGAACCAAATAATAGATAAACACATAAATAAAACGAGAAACAAAT
TATGTCCAACCTGTGTATGTGTTTGAATCAGCAACAGATACTTTTAGTGAGTTACCTAAA
ATTTCTGGCTGGTGATCGCGCTCTTTCTCAGTCAGATCCTGCTGGGCGCAATCACTGCGC
TGTTCACCCACGTGGAGCCGACGGCGCCCGTCGTCGGCGGGGTAGCGGTGCCGACGTACT
AGCTGTTTGCTTATGTTGCTGAAGAAAACAGCGTATTGATCTTCCCGGAATGTTACGCAG
GGAACATCTTCATCATCAATATGCGGTGAACCTTGTTTGAGTTCTTTTACCTTTTAAGTT
GTTTATTCAAGGTCTGAGTAGAGTTCAACAAGGCATGAACCGTTATCGCATTGCATTGAT
CACTAAATGTTTGAGTGCGGTGGCTGAAATTGTTAGTTTGCTAATTTTTATTGTATTAAC
CGCGACTTTCATTGGTTGCAAGTTGGTCGCTAAGGCGTCTGAAGTCAGCGCCAGCTCGGT
TATGTGTGTCGTCCGCCATTAGATTCCCGCCGCCATACTGAAACTCAATCTCATCGATAC
ATTCTCCTGGCGATAAAAGAGCTAGAGGTAAAAAGAAGTAATTTATGGGTGATTTTAAAG
AGCGGAAGCAGCAACACGCTCTCCAATATCGCAAACGCATCGCTCACCAATTCAAGCGTC
CGCTGGCCCCAACACAAGCCAGCGCCCAAATTTTTGCCCGGTTATATCTATCCGCCGCAT
TGCAGCCGCGGCAGGTATTGGTAACCAGGAATGCAGAAGCAGCTAAAACCATTTGCCCGG
CCAACAGTCTGCCCAGCAAAACGGAACTGACAGTGATTAGACCCAACCGAAACATAAGTC
CCGATGTTGTAAAGGCTGCCAGACAGGCCTGACAGGAAACCCACGATCTTGCCGGGAATG
AATACCTTGAGCACCAATTATTCCTTGAATTCCGTCAAACCTTGAACACCAATTTTCACC
AGGTTGATTGCGGGCGGGTTGACCACGCTTCCATCACCCGCGCGGTGGAGGCGGCGCTGG
GGATATAAATTCAAGCCGGTCTAATTTCGGTTCGCCTGTCTTGAGGAGTCTGACAATGAG
GTTTTCGTTTTCTTCAACAGTATACATTGCAGCAATTTTATTATACGAAACGCGAGCTGC
CACAAAATTATTAGGGTATCATTTAAAGGCTGGCTTTATAATTTCTTCATGGTCTTTTTT
GATGCGGTGCTGTAATGTGGTGTGCATCAGAAGAGAATCCTCCACCGATTAATTCCGCGT
ATGGGTTCAGCTCTTGTAGGGTAGATTCCAGCGACTAAATCAAACAGGATGATCTATTAG
CACGATTTCGGCCAGGCCGGCGGGTTTTACTTTTTGTCTCATGGAGGTTCGTTCGATGGC
AAAGAAATAGATGATGGTGTTTTAATTCCGGCTAGTTGCAATTTTTTTNTTTCTATTTCG
ACTGTGGTTCAATCGAGCATCATATAAAATACTTCATCTTCGATAGTCTTTTTTTCTTTT
GGACACCGCTTGCCGGGCCGATCTGTTCGCCAAGAGAATCGCCGCCGAGCACTGGCGGGA
GTGCCTGTCCCCTGTGCCTGTGCCTGTGCCTGGGGCAATTTTCGGGCGCATTCACGATTT
TGCTTTATCGAGGTTGTTGTACAGTGATTTTACATCGGTTACCAGACCTTGACTTTCAAG
TTTCGGGTGGCGACAATAGATTGTTTCTCGTTTTTTATGTATATGTCCCTGACTACGAAC
TGCGAGGCGTGAACGCTCACGGCAAAACGAAGGCCGTTCTTCTTCGCCGCTTTCGCCCAG
GTGATCAGCTTTGACAAACTCTCCAGCGTGTTCATCAGCAACACCAACCACGAAGAAAAT
CACTATTATTAAGAAATCTATGTCACATAAGTTGTCATACTTATTGTACAACAAATTAAG
CTGTGCACTTGTTACCATTATTGTTTGGTTTAAAATATGTTATATTCTAGAATAATACCGT
CACATCACCGGGAATACCTTGGGTCCGTCACTCCTTGAGGACCGGTAATCCGCGCAATCCT
GAGCGATCGATAGATGAGATACGTGATTGGTAAGATGGCTAAAGTTAAACCAATTAAGCCT
ATCAAAAATTGCATACAATCGGCATCGCAACACTTATTATCCCTGTCATCATACATTATTG
TGCAGATCTTGGCGGCTTGGCCATTGCCGCTGGCTCCCGCATGCACAATGTTCTTGCCCAT
CACGATGGAAAAGAAATCTAAAGGACTCAAGCAACTCACCAAACCTAACAGCACCCCACTG
GACACATAGACAGCAACAAACAGGAGTGTAAACATGGCGTATGTGAGTCAAGAAATGAAAG
CTGACGCTGAAATTTACGTCTTTTGTTACCAGTCAAACGCGCTGGCGTGATCTTGGCATTC
GCTCTTTTTCGCCACTGCAAGTCTCCCCTTCAACAACAGTCAGCACAAAAGCAATGATGGT
TTGGCAATCAGGTCAACTTTCACGGACAGCGGCAGGGTCAGCAGAACTCTTGCGAACCACC
GTATCGGACTTGCGTTCGACCCGTTTGATACGGAGCAGAAATGGAACGAAGGCCAATGTGG
CAAAGTTATCAGCGCGGCCGTCAAATCGCCGCACAAGCAGGATTTGATCCTTGGCCCGAGC
CACGTTTTACATGCTTAGCTGTATCCTCTTGCGTTCTTTATCAATTTCCAGAACTTTTACC
GCTGGTGCAAGATCCCGTAGTGGGAAGCATTCTCAAGTTGTTCGCTGATAACCCTCGTTCT
CAAAGAAAGATGGGAAAGAGATCATGGAAGAAATGGGAGGAAAGAAACTGGATGATGGTCT
CAGCGAGCCGGCGGCCTTCAAACTGACGACGACCACGATCGAATGAGCTGAGCGAATTGAG
TGAATTATAATTATATTGATTAATTTATTATAATTATAAATGGGGTCTAATACAGTGCAAG
CCTTCGGTCGGCGTGTCGGAAAGGTCCACGGCCGCGTCGACGGCGTGGAACTCGCCGTCGT
AACGCCTTTAAATCTTCTTCGCTTAAGCGGCCAGAAGTAAATTCACCAACTGCTTCAAATG
GTGACATGTCTTCAAAATTCTGATAACAAGCATTACCTTGTTCGTCAGTCCAATATACTTT
CAAAGGAGAAAATAATGTCACAATCATAGATCGAAATTTGCTTGTAAAGAGCTAGTGTTCC
CTGCGCACGCTGGCGCTGTCGGAAGCCGCCGGCGGCAGCGGCGCCGATCATCTCACCTGCT
ACTAGGCCGAATTGGCACTTGTCCAGTTTTCACTTCCTCTCCACTTTCGTGTAATTCACCT
CAGGGTCGTTGGGCAGATGCTCGTAATGATGATCCAACTCCAGGTGATTGGATCTATTTTG
TGACGGGTCGCTGGTCTTCGCGGTCAGTCCACACACTTGCCTTGATTACAATTTGCTGTTC
GGCCGCCCGATGCCGGGCGCGCCGAACGAAGCGGCGCTGCTCGCACGGCGCATCATCGTCG
CCGTACCGCTTGGTGTGTAAAAATCTGTACACCTAATTGAGTTACGTTTGAAGCAACCGCT
GTGGGCGATGCGATCGTTTTCCCAGGCGAAGTCGTCGAGCCGCTCGGGCACGGCGCGCGCG
GGTCCTAAAGCTTGCCCATTAGCTAAATGGGAAAATAAAATATTATAGTTATGGCACAATT
GAAGCTCATCGCGGTCTTGATGTCCTCCATGTCCTTGGCGGTGAGCGCCGGCGCCGTCAGG
GGGTATGTGATATCGAGTGTGAAGAATAGATTGAAGCAAGAGTGTGAGGGAATGTCGAGGG
CAAAGAGACGGTAATATCGCATTAAAGATATAACTTACGAAGACGAAGTTTTAACCCATAC
AAATCCAATATAATTGAATAGTGCCTATTCCGCGCCGGGGTGGTTGATGTGTGCCTTGAAT
GAGGTGCAACCCGGCGCGGTGGTCAAGTACGTTTTGCAGAACTACGACTTCACGGCAAAAT
GAACTTCAGGTAGGAACGGCCTATCTGACTGTCAGCGACATCGACGTAGAAGTCGCAATAT
CATTACCGAATAATAGATATATTCTTAGAATCACCAACCCGAGTTACCAGCTCCTTTAACC
TACGGCCGGGGAATTGCGTAGCTGGTCATACCGGAGCCGGGCGGCGCGGCGGACGGGATTC
TAAGTGAGAAAATTATGAAAAGTCCTTTTACAGGAAAAGAAATGAAACTTATTAGTGAGAC
CGATTGAAACGAGCTAAACCAATGACCCCACTGAGATCAACTCCGCATCGCCACCCGTACC
CTGCCATGACACTGAGCGACACTGCATTTCAATTAATGAGAAATACGGCCATCCGTATGAT
ACTCTAAGATATATACGTACTTGCTATTACTACCATACGGTACTTTATGACCTTCGATATA
CAACACCAACGCTGCGAGTGCGCCAGTGGACGCCTTCATGTCTGCCGTGCTTGCCCTGCCC
GCGCGATATGCCCGATTCTTCGTGAATTTAATGTCCTGCGAAAAACCAATCGATCAACATT
CATCCAGATAACCACCCTGAGCAAGTGCAACAAGCCCACCACCTGCCATAGTTTGTGGGAG
AACTACTTCTACACGCAATTTCAAGTTGGTTCATCTAGTAACTTAGACAAAGGCATCATTG
TAAATGGCGGAAATACGCGTTGTTCCAACACTTCTCTTCTCAGATGGTGTTGCACTTAACT
GGTTACGTTGTATCCTGTAAGGTCTCCCATAGCACTACCGCTTACGATAGAGCCTCCAGTT
CTGTGCAAACTGCGCCAAATGAAACCATCGTGATTACTGCAACCAGAATCAGAGCAATTGC
TGCGGCGATTCGAGAACTTGTCGAGGGCAGCACGGCTCAGAGCGAAACCGAGACGAGTATG
CCACCTTCTGTTCTGTCAGCGAATCGACGGCATCAAACAGCGCCTTCAACTCGCTGGGCGC
GGATCGTCACTACCGGCTCGTCGATAATCAGGCCGGTGACCATCCCCGCCGCCCCAACAAT
GAAACTACAACCAAAATTACAGAGGCAATTACAGACAAAACAACAATTATAATAATAATAG
AGGGGGCATAGAAAGATTATCCACACGCGTTTTCATGATTATCTCTTCATATTTGCAGTTG
GATATTATCCAGCGGCACCGCGGAACGGGAGTCAATCTCGAACAGAACCGCCGTGTTTTGG
CATCGCTCCACTGCGCGATGCTGGTGTCATTGTCGCGAGCGGCCCTGACGGTTATAAGATT
GTCGTCCAGCTTGACGATTGCGCCACCGTCCTCGGTGTCGATGACGTCAGCCTCCTCGTCC
GGGGTTTCTTTTCGAATACGATGGGCGCGTGGCCAAGTTGCGCGAGTTCTGCTGCGCAACC
AAGGTGATCCAAGTAAGGCTAATTCCTGGAGATACAGTTACTGGCGGTAGTTCTGTAACAC
CACGATGGAAAAGAAATCTAAAGGACTCAAGCAACTCACCAAACCTAACAGCACCCCACTG
ATGCTCTAGTAAATGTGAAGAAGAAATCTGCTTAGTTTGTGAAACAGGGAAAAAATGTAGT
TTGAGTTGTTTGTCGATGTGGCTGAAACTGCTGTTACAAATCCTGAGACATTTCCTGTGAT
TGAGTGTCTGCCGCAGCAGATTGTCGGGACAAGAGTCATCGACCATCCGAATGAACGCTTT
CCCGCCCTCGTCCATCCGATTCACCATCCCCCGTCCCCCATCAACCATCCCCATCAACCAT
AGTGAAAAATGTGGCATTACATCGTTGCCCGAAGCGGTTGCGGCCACTAAGTTCAATAACG
CTTCCAGTTCTTCGGCAACATCACCCAAGGCTCCAGCGGGCTCACCGATGTTGGTTAATCA
TTTTCACCGTACTGGTCGATCATTTCCTGACCGTACTGAGCAAACAGCTCCTTGGCCTTGG
CCTACAAATGGAAAGCCCCGAAGAAGTTGGTTTAGTGAGCCGTGGAAGTGATTTCATTTTG
GTTCGCGATCCACAATCCGCGTCCGCCTTCGCCTTTGAGACCGGGGCGAGCGCGACCGACG
GATGATCATCAACGCTCCGGTCATGTCTCGCCTCCTGGTCGCGCCCCGGGGCGACGCCGCC
TACTATCTGGCAGTGTCAATCCTACCCACTACCTAGTGTGAGAATTATTTACATAAATTAA
GATGGTCGAGACCTAAGCCATACGATACGTGATAAAGACCTTCGTCAAGTTCGACTTCTTC
GGTGGGCGCGAAGTAGCCCGTGACCTGGTAGCCCCAGGAGCCGCCGAAGGGGTGCTCCATG
TACGTCCGCATTCACTTTCATGCCGGTTTTCGTGACGTAGAGTCCGCGATGGACTCGACGT
CAAATATGACTGGAATTAGTGTAATACAATTGCAGAGTGGCGCGTTATGATGTCCGAACTT
GCGGCAACAGCAACTACCTGCTCGGCACCGACGATCAGGGCAGGGATGTCCTCTCGGCGAT
CCGTGCTGCTAATGGTATGCCACCTTACAAGATCATTGAGATTGACGATTCTATCACAAAC
CCGCCGTCTCAAACTCTCGACCGAATGGAAGATCGAAAACATCGCCCACGACAAGGCGGGC
TTTCGAAAGATTTTCAATAGTTAAATACTCAACACTAATTATAACATCATAATTATTATAC
GAGCCGCCGCAGGAGCAGCCGCAAGTTTTTTATTTATGTTCTTTTTCATAGTTCTCCTATT
CTGCTATTGAATCACGTTCATTGGTGCTTGATCTGGGTATTAAACCCGTAGGGAATATTGA
GGCGGTGCCGGTGCGCTCCAGCTGGGCCACCTCGGCCGCGGGCACGTCCCACAGGGACATG
GGCGGGTGCCCTTGTTGTCGATGATCAGCGCCTGCCTGCGGGGCGCTGTGTCCACGCTGCT
GCACTCCAATCTTGTCGAACAATTCAATGTCGAGAGTTGTGGTTGCATTACCCTCTTTATC
TGTGGATGGCGGGGAGGTCCGCAGTCTCGAACTGCGGGGGCGGCCGATCGAGTTTACGCTG
GCATGTCCAAATCGTCAAAGAAAACTCGGGACATATTAGCGTCATAGTGCTGGCCCGTATG
GAGGTTTTGCGCCGAATCAGTTCCCGCAAAACAATAGAATCCAAAGGCAGTCTAGTCCAAG
AGCCGAGAATTGCCGCACTGCTTGTCGCATTGCCCGTCAAGGGAAGGCAACTCTTGCCCGT
CAGGTCACGCGCGCACTGCTCAACACGCAGGAATTCATCACGCGTTACTGATCTCACTGCG
TCAACGAAGCACAAATGATCGTTGAATCTGACGAACGGGACGGTAAAAGTTTGTATATGAG
CACAGGCGTTAGAGCGTCTAACCATGCGGTTGAATGGCAAATTCAAAGCTACGGCAACCTT
GTGTGGATCGTTTCGTTAACTGATTTTATTAATTGTTCTTCACTAGTGGGTGATAACAACT
GGATCTCGTGCGGTGGGGCGTTTCGTCGTCCTACTTGGAGCTGCGCGGGCGGCTGGGGCTT
CAAATAAATTTGATATCCCTGAACTAAAAAGAATGTTGTGGAACTATCACGACAGTGGTTC
ATTAAATTGTCTCAAGATCAAAGAGACTTTAAATGGGCAAGCAACGGCAAAAATTAATGAC
AGTGGAATTTCGTTTTAACGTTTTCACCCGTGACAATTTTCAATGTAAAGTGTGTAGCTCT
AGATTGATTGTGGAACTGTTCTGCTTATTATTTCATTCATTTATTTTGTCTGCCAAATTTG
GTTCAGAAAAGGCGGTTATATCCGTTTGCAAAGCGATGAGGAAGATGAGCAGCGTTACTTT
AATGCTTAATGGCGATGACGTGATCGCTGATGTTGATGTCAATGTGACCCGGCTCAATATG
CTTTTGTTTCGGCAGACTCCCTGGCCATCGGATTTTCGCTGTTCGGACTTGTTTCGCGAAT
AAAGAAAACAACGTTGAATACGCTGCGCTTTCTTTTACCCGAAATGCCAAAGACATAGAAG
TTTCGGGTGGCGACAATAGATTGTTTCTCGTTTTTTTATGTATATGTCCCTGACTACGAAC
ACTGGTACATCAGGTTCAAGTGGATTAACAGGTGATAGATATGCTACAACATCTACTACAT
GGATTGATGTCAGAGGTCGAGCGCACTCACCGTAGTCTCCTCTGGGGACGCAGTTCCTGCT
GATCTGTAGCACAACACCAAAACACCTAGAGCCATCCATCCGAAGAAGACGAATCCCCAAT
CCAATTTTCGGATACTGTCTAATTTTGTCCACATATTCAGTTTTTTCCTTTGATGCAATCT
CAATAACAGAACTGATGATTTCTTAATACAAGCTCAAATGGACAAAAAAGAATTGGCTATT
TGTAGTCATGATCATTCCCCTTTGAGTGCTTCAAGTTTTTCCTGTAAATCGGCTATTTCCT
AGCTAGCCCCGGTACGGTATCGACTGACTGGAACGCCGCGGCCTGCACTTGACTGTGCCAG
CATGAGCAAGCTAGAATTATTGATGTTCAGCTTATGCTCAACTTTGGAAGCCCAATCATAA
GATCATTTTAATGACCTTATGCAATGGAGAGATTTTGATTTATTCAGATATTAGTTAACCT
AGCAGCGCAGGGTGCAGTTAGCTGATGATCAAAATTGCTAATAACCTACGCAGTCAAGCAG
ACTCAAAGTTAGAACTTGGGAATTCAAATGTTAACAATCTAGATATTCACAAAAAACAATT
ATTCAATCGAAACTTACGGTTCTTATAGCGGTACTGGTTTTTGCTGCTGCTTCGGTTTTTG
CCGACGCAGCGCGTCGATCATCGCTTCCAGTTCCGGCACGCGCGCGGGTTCGGCACAGAAG
TGTTGCTCACAAGTGTCGCAGCACCACTTGACCCCGTAGTAGTAAGTGATGTGATGCGATT
GGGCATTAGCTCTCAGACTCACCACAAAGTGATGACTGATAAGAAAGCGCTGAAAGAGACT
GGGCCAGCCATTTCATAGCCGCTGCCGCCGAAAGTTGACCTGAACCCGCGCCTCAGCGCCG
GAACCATTAGTTAGTCTTTGCTCACCTGACTGGTTTGTAATGTCTGGAACCCATTCATAAG
TCTCTATTAGCTGATGGTACTATCGCACGTGTAGATTCATCTACTGGAGCTAAAACTGCTT
TCTGCCGCTTTAGGTTGCTGGTGAAGATGTGTCTGCTCGTGTGCGGTCAGCTGTTTGAAAT
TGTATCTTATAGCATGTAAGCGTTTTTGGTATGTGTTCTTAGCCTGTGTTCTGTAGTTTGT
CAGGTGAATCTAGGAATTATAAATCCAAAACTGGTGCATGGGATAGAATCAAACCTAATAG
TTCAAGGTGAACTTGAAAAACCAGTTATCACAGTATCCCCGGACGACACAAAAGGAGTCTT
GGCAAGAAAGTGGATCGTCACAAATTTTACAATGCCTCCGTCAGCGCAGCCATCGATCCTG
GTGGCGCGGGCGATGTCGATCAGGTCGGCGACCACGGCGCTGGCGGTCGGCCCTTCGCCGG
CCGCCGTTTCGCATGGCTCGACGGTCAACGTTTGATGGTGAACGGCACGCCGATCGCCGAT
CTATGATGGATCTGGCTATTTTGGCTTTCAAATTCAAGGTGAATCGAAAACGATTCAACAT
GCAACACTTCAGAATCGCAGTCGCGGTGGTCGGCTGGCCTACGCAGTCGCCACTGGGTCGG
TTTTGAAAATATATTAAGAGAAGGAATATCAGATCAAATAAAAAACCTGGGATGGTTGTTA
CCCCGCAGACTCTCCACCGCTAACTGATAGCTGGTGCCGCCCGACATCGAATCCTTCACGG
TCCTCGGCGCTGCCTCAATCGAACTCGAGATCCAGGAATCCGGGGAGACCGTCCACCTCCT
GAAAGAAAAGAGAGAGAAAGAGAGAGAGAAAAAGAAGAAAAGAAGAGAAAGAGAGAGAAAG
GGCCAGTCCAATACGGTCTTGACTTTGGCGTGGTCCTATGGCGATACCATCAGGAGAAATG
GGTTACCACCACCAGCTTCATTCATCACTTTAAAGAAGTCTAGGTCAATTTGTTTCATCTT
CGTACAAAATGTATTAGCCATCATATCCTGTGGTTGTAACTGTGCGGCTTGATCGTTGCTT
GGCAAGACCACCAGCGCGCGCCTGATGGCCATGGCGCTGAACTGTTCCAACCGAACCGGCG
AGCAATATGGTCGATTAGGCGGCATGACATCCCTTGGTCAGCAATCGGCTGCTGGCGTTGG
AGCAATATGGTCGATTAGGCGGCATGACATCCCTTGGTCAGCAATCGGCTGCTGGCGTTGG
GTTTGGGAATTATGAATTATGAATTATGAATTACGAATTAAGAATTAGGAATTAAGGATTC
TCAAGACCCGCACAATAATTAGACCATCCATGCCCGCTTCGCGGTTGCCAGATTTATTTTT
GCCATCAGGACTAGCCCCTGCGTTCTTGATAGTAGGATGGTCAATGAATGCTGAGACACGC
TACTTACTAGCATTTCGTGGAACTTAACCACTTCATCGCGCCATTCTTGACATTCAACCTT
CATCCCGTCAAGTCGTTAGTGCTCTTGCCAGCATACTGGATGATTTCCGACCTCAATGGAG
GATGCGGGCATATACCGCTGTCCGCATCTGGCCTGATACTTCGTCGGTGTTTTGCGTTGGG
CGTCAACGGCGTCGAAATCGACTTCTTCCGGCATCCGGTCTTCTTCCGGCGGCCCGCTCTC
CAGCGCAGTACGCCCGCCGCCGGATCGCAAATAAACAGTTCTTCAAGACGTTCATGGGTAA
CAGGCAAATCAGCTTCTGCACAACCTGGATTTAACGTTGTTAGCTTAAGTATTAAGGAAAC
GAGTCAATTTCTGACTCTAAGACTGCTCTTGCTACTCGTCAGAACGAGTTAGATGACCTTG
AGTTACGCTGCGAGTACAGCTCACTGCGCCTTTGGCTCTCACATCGTTTGCAGTACGAACG
TCGTCCGTTTGCAAGCCGAACGCACGCCGGATCGCATCGCGATCGAAGCCCCGAATGAGTG
CCATCGGCGCCTAAAAACCGGCTTTCCCTCCTGTCACCGCGGCAAATAGATACATTGCTAG
GATGACGAGAATTCGTGAGAATATGTATGAATACCTTGGTCTACCAGAATTCAATATGCAT
TGCCGGAAGCGATCACTGACACCAACAGCCTTGATTTTCAGGTCGCCCCGGACAGTGTCGG
TGAAACATCAACTTGTTCTTCGAATAGAGATTGGAAACTTTCTTGTAATCCCTTTCCTAAA
GGAGCGATGTGGTTTCCAAATTGGTTGATATCGCTTGTATCTTGAAGGTCTTCGATGTTCC
ATTATGTTGTTCTCCGTCACTTGAACGACATAGTAAAGAATAACCAGTGAATAATGCGAGC
CAAATCCAATACGCTTTCTGTATCTACCTCGAAATTTTTTTCCATCGCACAAATGACTGAT
TATGGATTTCTGCTTTGGCTATTGATGTAGACATTGTTCCGCAAGGCACACAGGGGATAGG
GTCTGTAGCGACGGCCGTGATGGCGAGCATCAGGATGAAGGTGAGCAGCGATTCCCAGACG
CTTGACCGATCCAAGAAGACAGTCCGAGGCGTATTCGACATATCCGAGGACGGTCGAATTT
ATCTTGCTAGAGACTTGGAAGGACTGGAGTCCAAGAGCAAGGAAGAGCGAGCCAAGATCAT
TGAATGAAATACTGTCTCCTTACTTAAACCTTCAAATGAAAACTTTATCCAAAGGATTGTG
GTTCCAAAGAGTTGGGCGCTGATTGGTTGAATATCTCCGAAGGTGTTGTACCACGTCGGGT
CACGACACCATCAAGCCAAATTGGTTATTATCAGCGAACCTGAAAAAGGGAGCACATTTCG
AGGTACAGGATGAGCTACAGGTCTAGAAGGTAGTTGAATTAAAGACTAATGTTTAAGCTTT
GGGTATCCGCCAAACTCTGCCCCGCAATCAGGACAAGTTGATGCCCACTTAGCCCNGANAC
AAACTCCTCAAATAATTGATAAATTCCGCCTTAGCTGCACGGGTGCTGTAAAAGTAGAATT
CTCGGTCCGATGAAAGAGCGACATCGTCGAGAAGCACTAGCCATCCGCTCAGCGGAGAGTC
AAAGCACAAACCGAAGCGAGTGCCTGTGCGGCGCTCGATCTTCAATTACGCCGCCAGGGCG
AAGAATCTGATCTGCTATTGCTTGAATATGTTGAATATATTCATTTATAGAGTATTTAAAT
CAGCTGCCAAATTTGCCGCACTTCTTTCCATCACAGGCATTCTGGTGAATGAATATCTGTT
TTTTGAATCAATATATCCAATTCTTTTCTTGTCCACATTTTGTTTGAAACTCCGATTTTGT
GAAGCGCCGCGTTCATGGATGCCGGAACTGACGGTAAAAACATTGTAGTTGAGATGAACGG
GCAAAAAACAAGCCATTCGATCAGGAAACGACCCGGCCGATTCAACGATTAACTGTGAAAG
TGGCTGAGTGTCGTACCGGATGCATTTTGATTCTGAACTTGATATTCGCGGCCTGATTTTT
GAAACGCAAGTGGTTTAAGAAACTGTACATTGGCAGGATTAACTGGTGTTCTTAGTGCAGC
GAATCACTAGCCATTTCATTTAATCTTTTGAGTTGTCTAGGATTTAATTTACTTACAAAAT
TATTCAGGCAAATGCGCCAACAGGATGGACAAAATACAACTACACATAATGATAAAACTTT
GATCGAGGAGATGACTATAATAGTAAGTAAGGGTGCTGAACTGAAAACTGCGATACCTTTT
GTGCGCTCCTGAACAATCCTTGGGTGTCATTGAAGGAGTTACTGAAGGAAGTTACTGTGCG
CTTTCACCGCTGCCAGCGGTAGATATAGTGGCAAGCTCTCCGTTTGCTTTTTTCTGTTTGG
GAATTCTACATCAACTACTTCTACGAGCTTATGGTTCGTACATCAACTTCTGCTGCTTTGA
ATTTAGTGCTAACACCGTCGGTGTTGGTAACTCCGCCCAACCGAAACATTAACCATGGCGG
CATATAATAAAAAAATTAGTCAATAAATGATAATCCATTGGTTGAGATTGATTTCCCTAAA
TTAACTTAACACACTGTCTAAAAAAATTAAAGAATATGCTTTTAAGTTGTGACGCATGTTTC
TTTTGCCGGCCGCCAAACCAGCGCCAGTAATCTCTGCGGCAAAGATGCAATTTTTTCCGGAT
CAAGAATTTTTAGGTGTTGTCGATACGCTGACGCCGTCGTCGTCGCTTCAATCCTATAAGTT
GGGCTACAAGATCATCTATTCTGATGACTGCAATAATATCTATTGGAATGAGGTGGAAAAAT
CAAGAATTTTTAGGTGTTGTCGATACGCTGACGCCGTCGTCGTCGCTTCAATCCTATAAGTT
GGTCGGAATGCGTTTGCTTGCTCTGGTGAAAGCAACGAAGCGAAGCGGGCGGCATCGCGCAT
ATGTCGCCTACGCCGCCAACGTCTCGCTCGCCACGGTTTCGCGGACCCTGAACAACCCGCAG
GCTAGTTGTATTTGATAACAGCGTTTTGGCTAAATTGTCAGCCATAATATATTGTGAAAACT
CGCCGGTATCAATCACCATCGTGCTGCTGGTGGCCAGCGCGTCGGTGCTTCTGGCCCGCTGG
TACTGTTACATCGTTAAACGTGTTTTGCGGATTCCTCTCATTACTATACGCGTCCCAGCATG
CTTGCACAAGCGCACAACAATGCAGACAAGAACAATCCAGCTGCACTGACTTTAAGAGTATT
AAATAGACTATGAAGTTGGCTTTTAACGAAGCCTGTAACAAAGCGTTTGGCAGTGTGATTAC
GATCATTCTTTCTGTTCCCCACGGCCACAGGCCCACAGTTGAGTGACACGGTAGTGGGTGGT
TGAAAGGATTAGCATAACGGAGTGCCGCGAATGCATCGTCAAAGTATAGTTCTACCTACCAA
CCCCCTTAACGGCCAGCTTTGCGAAGGAGGGCTTTGTCATGTCCTTGTCTAGCACCATCGCT
TGGGTAGATGGCGTCATGCGCGGCGAGGCCACGTATGCTGGGACTGTCATCGACGATACAGC
GGCGAGGAACAAGACCAGGCAGGCCAGAAAATCGATCCGTCGACGGGACAAGCGCAGGGGTT
TAACGGAACAACATCAACTGTTGGAACTGCAGTTTCAATTACTGTACGCCCAGTTGCAGGCG
ATGTTGTGGTAGGATATCTTATCTCAAAATCAAGTTAAGGTATTTTAAGATATTGTAAAAGA
CACCAGCACCTCCATTTCCAGCACGACTAAGACTGGGTTGATTATTTTCTCCATTTTTTGAT
GGTCATGGCGGCGATGCAGGGCGACCTCCAGAAGATCTGGGAGGGCGAGCAAAAGTACGGGT
TGTCGTGTTTTTTCTAAACTTTGTTCTAGTTTAGCTGTTGCAGCACTTTGACCATTCATCAC
AGTCCGTTGTTCTGCTCTACATAATCATAGAACCATGTCCATGATAGCGCACCTATCTTGAC
AGCCGGCCGCCTCCGCCCATGAAGAAAACGAAGGTGAGAATGATCGCGCCGAGCGCGGCCTT
CTTAGTGCTATTCTTTCTTCAGTCTTGGTGGATTACTCCTAACGAGTAAGAGAGCAGACTAT
GTGAGTGATATCTCAACATACAATGGCAAAGCCTTTTCAAATAGGCCAAATCAACTTGAGGC
CAATCGCTGCGCCGCCTGAAGGCAATGAGATTGCGGTCTACTTTGGCACCTACACCGGTCCC
AATAGCTGATATGGAAACCCCGTTAACACAACATATACAGCCCGGTGGCGTTCCGATGACCT
TCATGATCGGTCACCAGACTTCGCTCACTCAATAAGACCTCAGGATATCCACGTTCCATGGC
CACCAGCACCTCCATTTCCAGCACGACTAAGACTGGGTTGATTATTTTCTCCATTTTTTGAT
GGTTGAGCGCGTCGGATTCGATCCAGTTCACGATCAAAGCGATTTTCGCGTAGGGCATGGCG
AAATCATTTACATCAGATGTTTATGGCGGAATTAGAAAAGGTCTCGATGAAGGCAAGAGCTT
TACAAGCGCGTGGTTGGCATCATGAACGACAAGACAGGATATGCGCCAGACGATGTTGAAAG
TTAAGATCTCGCCGGAAACAGCCCTCAAAAGAATTGCCGCCCGAGCTCAAATTAATAACCGC
CATAGGCGTGCTTCGCGTCCGGGGAAAACGCCATGTGCCGCGGACCCGCGCCGGGCGCGGTG
CAGGGCCATTAGATCCGGGGCGACGGGCGCCTGATCCACCCGCACCTGCCAGAGTTGGCAGT
GGATTTTCAACTCGCGACCATCCCAATTTTCCAGTTCGCAATTTTCTACACGCTGGATTTGG
TTACTCCGCAAGTATTGCTATGGCTTGACAAATATATAGAATCACCGTATTATATTACTAAG
CCACCCGCCGCCACGAAGCCTGACATTCGCCGATAAGTTTTTTAAAATAGTCGTCGAGGAGG
CAGCCAGCACCACCTCCGCTATCTCGCTGATACTGTCAAGACAGATCGTCTGATAACCGGAT
GGGAAAGAAGACGGCAGGCGAGAAGACCCGAACCCTCCACGAAGACGCCGTAGCCCTCACCC
TAACGGAACAACATCAACTGTTGGAACTGCAGTTTCAATTACTGTACGCCCAGTTGCAGGCG
GCAACAGTTTCCGCGATGGTTTTCATTCTTTACGAAACAGCAGCCGCCCGTCAGTTTCTTAG
TATTCCATTTCAGCCCACATCTTTGCGCCAATCCACTCAGGTAAGCCAAAGTAAAATAACCT
GACATCGAAGGCGTTGAGGGCGCACGCGCTGGCGTCGTAAATGCGCTGCGCGCGATCCTGCC
CAAATGATAAGACTAGAGGGAGTGGTCCTAGGTAAGCCGCGAAAGGCTTTTGGGAGAGGAAT
CGGCTAATCGCCTTTTGGATATTGTAGATGGAATGGGTTTAGCGCCAGATGAAAGCGCCTAT
TGTTCAACTAAGCCTCTGGGCCTCCGGACCTCTCATCAAGTTCGGGCCTTCGCCTGACGCTT
CTGGACGCGTGACGTTGAAGCGAATGACATCCTGCGCGATGTGTATGAGACGAAGGCGGTGG
GGGTGCCTGCCGGTGGCCATCCGTCGCCGCGGGTGTCGCGGAAACCCAAGCGGAATCAGGCG
ACAATGGGCAATTTTTATTAATTGGTGCAGACAGACCTGATTATTTTAACAAAAGATTCTTT
AATGGAATCCAGTTATATATTTTATTCATATTATTTTATTCTATATTACTTAAATTATAAAA
CACCGCTGCCGTCCTGATCAAGCATTTCACCCACCTGCTGCCGCGCTGTCCAAACCCGGCCT
GATGTATTGTAAGTGATGGTGCCTGTTAGAATGCCTCTGATATCTTGTAAACTGGCGGAACG
GGACCAGGACAAGGATGAGGAGAATGCAGAGAAAAGAAGGATAGTACATAGGAGTGAAGAAC
GTGTTGAATATGTGGCGATTGATACTGACGTTGATCCTGTTATTAGATTTGAGGTGGGTCAG
AATCAAATAAGTCTGCTGGAGAACTAGAAATTTTAGAGTATTTAAAAACAATAACAAATTCT
CAATTGCCAACAATAGAACTACTCGATAGATGATGCGGATGCATATAAAAACTCCCCTAACG
GGCTGTTCTTGTCTCATTTCCAATGCTCGTTTAGCCGCTTTTCTTGCGGCGTCTGGGGGAGT
GAAGAGCGCCGCGTAAACAAATAGCCGCAGCAAAGAAGGCCGGATGGATAATGCACAACGCC
CATCGAGCCGATATATGAAAGTGGCGAGACTAAGGAAAAAACAAGACGAATACTGCGTGGAT
CTTGCAGCTGCAGTGCCAGGCGCCTTGTGCCCTGGTCGTCTCCCTTCAGTGCGAAGCAGACT
TCGCGTAGGCGACGACGCTGACGATCGCCATGGTCCACGCGCGTTTCTCTTCGAGTGCCATG
TATCGATAAGATTCAGCTCGAACTCGCCGTTTCCGGCCGCGAACTTCATGCGCACAGGCTGC
CCCCGTGATGGGAGCTTCATGGCCTTCCAAGACCCTCCGCTGGTGAGCATCGGCGTCCCCGT
AGCCGGCCGCCTCCGCCCATGAAGAAAACGAAGGTGAGAATGATCGCGCCGAGCGCGGCCTT
GCCACGTCAGAAACCTTGAGGGTCGTGGCGTAGTCGACGATGCGGACGTAGCCCTTCGGGAC
TGCCAAAGCGATTCGCCGGGCGAGGGTTATGGCTGCCACGTCTGTGGAAGTGATCCAGTTGG
GTGGTATTGGTGCGAACCGTGAACATCCTGCTGAATTCTTCTATGACAATCTGATGATGGGT
AGAGCCGTTTAATAAGCAACACCATTCGCAGTACCAGCTGAAAATACTGGATTAGCCACCAA
CATCCAGTCAGCTAGGATTTGCTTGCTGTCTGAATTGAATTTTTGCAGAACAATACGAGCAG
GGATCACGCCGCCGTTTGCCTCAGCGAAGCCACGCGCGATCGCCAGACCGAGGCCGCTGCCG
AGGCCAGACAGGTAAGAATAAAAAACCCGGAATGTTTGTTTGATCATGGGAATTTATATGAG
GTGGGCTAGGATGAATATCATGGCATACCAATTCCTGATAGCGCCTTGATGCTGCTGAACCT
AAGGACTCCGTAACACCTTGTACGTATCCGAACGGATATCCCGGATAAACTGTTCGATAGTT
CACGCCGAGCACCTGTGTCACGACGGAATGCACCGCTGCACTTCGTGAGCACCAGTAGCATT
GGGTAGTTGGATTGCTTTATCGTATTCGTCAGGGTATATCTCAATGAACCGGGATTGAACCT
GAGACGGCCGTGGCGCAGCGGCGCCTGGCGGAGCAAGTGCGGGAGCTCAAGGATCTCGAGCT
ACTTGAACCAGTGAATTCTTTGTAGAAGCACCTGGTTGAATGCTTGAGTCGTGAAAGCTACA
GCACGCCTAACCTGCAGGTTAAGGTGTGTTCAAGTTAAGTGGGTTGTGGAGCAACAGAACAG
GACACCTCGCCGGCTTTACTGTACGCGCCGATCCCGCTGCTCATTTGGGCGGCGTTGCGCTT
CGGGTATTTGCAGGCGGACGCCTATAACGGGCTACGACGCGCTGTTCACCGAGCCGGAAGCG
CTTCTTTTACATCCAGATTTTCCTGGGAGAGGATCGTTTTTTGCATTTCTTCGGCATACCGT
GGGGACTGCTCGCGCCCCAAGGCACTCAACGCCTGTGACATGCCGGGAGTCTCGTTGGCGGC
TGGGGAAGCAATTATCTTACTCTTAAAACTTTAGAGATAATTTTCATACAGGATTTGATTTT
CAGCAATTACACCTTCACCAACAATGATAAAAACACAGGCCAACTCGGCAAATTAAAGTTGG
GTGTTGAATATGTGGCGATTGATACTGACGTTGATCCTGTTATTAGATTTGAGGTGGGTCAG
TACGCCACGCACAGCAGGATTTGATGCCTCTGGTGCCACGGATGCGCGCTCAATATTGTCAG
TTCAATTGGAATGGCGGTACTACAATGATGGAAAAGCGTGGCTTGCAAAAGGACTATACACG
AATCGGCCGTGACGACAAGGAAAACACCCTGCTTTTCGATCACCTCAAAAATGGTGAAACGG
TGCTCCCGCCACCTGAATACCAGCTTAACCCGTTGGTGCTTTGGAGGCTTCTGGCTCTGGAT
CTCTGCGGCATGACAACTTGGCGAAAATGGTGAAGGAGGTGAATTGGGGCTGGGAACGCAGG
GAAGCAGCACCCACGAAGTACTTCACCGCGTCGGACTGACCAAGGTCGCCCCAGATACGCAT
TGTGGTTCAGATTCGTGCGGTTACTTGGGGAGACATTCCCGCGGATCGGTGATTTTGCCGTT
CACAGCCGCGCTGGCGACTTGCTCTCCGAAGACGTGAGTGGGTCGGTCGCTGGCGATGAGCT
GGTACCTGTGCCATTATTTCTTAGTGGTTTTGATCATTACTTTTTAGTAACAGACTTACTAG
CCGGCCTTCTCCATGTCTTCCACCAGCCGCGCGGCGCGGTTGTAGCCGATCTTCAGGTGGCG
CGTTTCTTCCGTCTCGGTGACGAAGTTTTCACACCTATTCGGCGTACGCACGGGGCACTGAG
GACAAGGGTGATTGGTCAAACGGTGGTGGTCGATAACAAACCAGGCGCTAGCGGAAATATTG
TGCTCGCGGCCGTCCACGCCGTACCGACGTCGTCGGACGCGAGCAGGGTCAGGGCGGCAGGG
GCTTAAGCGTGGCAGGGGGTTGCGCCCCGTGAGCCGCAAGCGTGGCAAGGAGCTGCGGGCCT
GGGGGCCGCCTTTATACAAAGTTGCATTAATAAAAGCATATTAGACGACACTGAGGTGCATG
TTGCCATTTTGGGCTCAATCTAGTCACACTGATCAGTAACCAAAAATAATCCAACGTCTTTG
CCAGCCACAGATCACCGGCCGGAATCAGCACCTCGCAACGGTTCTCTGCGGGCAACTCCAAG
CTGGTGCAGGCCGGTGCCATGGACATGTTTCCGCAGACCGCGCACGTCGAGGCCATTGCCGT
GGTGTGAAACTGGCCGAAAGACTTGAATTGCCGCTGCTTGGACAAATACCAATTGTGCAGGG
GTTCTCAGTTGTGCGTAATCGGCTGTACACGAGTAGGTTGGTGGCTACTTAGTACCGTAACG
TCCTCAATATGGAATAGTCCATTTCTCAACGAGATCAGTTTGTCTGCGCTCGGTTGTTTGCT
CTGCCTGAACAACGCTGACTTCACCGGGCCTCTGGGGACGGCAGACCGTGCCCGCCAGGTGG
CATATCCAGACCAAGACCACATTGCCCATTTAAAGATCCACTTAGAATATGCCCAAAATCCT
GAATAGGCCCCGCGCTCGTCTCGTTTAATAGGCCCTCTATAGTCTCTTTAGCTAGTGAATCT
AAATAATTCATTTAGGGCTTCAATTTTCTGTTTTTTACCCACGAACACATCATAGCAGTGTT
AGTCTCTTTATTGTATTCTATTTTGTGTCCAGCATGTCTATCAAAGAATATACTATCGTTTT
ACTACACCAACTTTTCCGCAAATGACAATAGACCATAATACTTGTTCGAGACCTTTAGAATA
CCCGACCGGCACGGTCCACGGTCTCACCGTCCGGAGTCTCCGCCCCGTCCGGCAGCTCCACG
CCTACTATCCACTTTGACCCGGTTATGAGATAATCTGGTGATGTAACTGCACAAGGTTTCTC
TGGAAACAGCGTTTGATCACTGGCGTTAATTTAGCGCTTGACGCAGAGCGTAATTCACCAAA
CGCGATTGGCAAAACAGAGGACTTCTTCCACTCGCTAAACATGCCTACCCGGCTGGAGTCTT
CTATCTCGTTCTATTCATATCTATCCACAACCTAAACCACTAGTTAAAGTTCGGAAATAATC
GCGTCAATGCACTGCCCACGAGTTCGGGTTCGTCGATGAATCTCGCGAAGATCTATGTCGAC
GGATGCTTTGGTGTATGACTTTTGAAGAAGAAAATATACACGTGCCACAAAACGAAGTTATT
CTTGATGGTTTCGAATAGCATCCAATAATTCGGGTGCAATGTTTGTGGGAATTTGTGCCTGT
CACACACACGGACACACACACACACGGACGGACGGACACACACACACACACGCACGACTTCC
GATTATTCAGTAGTTGAGGGCAACCAATCCAAACCTGATGAATTGATTATTCGGTAGTTGAG
CATGATCGTAACTTGACTTTTAAGCTGGCCCGTTCGAAATTTGTGAAGCAGTTTTGATTCAT
CCACGTCGATCACACCACCCTTGACCGACTTCCACCAGGGCCGCCGCTTGCACATCGCAATG
AATACGGTTGAAGGCACAATGAACAGCATTAAGAAAGCCGCTGGTGCTGCACAGGTGGCTTT
GTGGAGATTTTACAATAGAAGCGTGGGTGTATCCGACAACATCTGGAACAGAAAGAGTTATT
CATGTTAATGATCGCTTCCCACATGAGATTGCTGTTAGGGCTCACTGGCGGTTGTAGACTTG
AACAGCAGGAGCCGGAGCAGTCTTTTGTACCAGCGGACTGCGGTTAGGAATGTTTAATTGCC
TTTAACTCATATAGACGTGATTGAGTTGAGCTTAACATAATTAAAATTATATATACAAAGTG
TCATCATCCAGGGCTCGATCCCCGGCCCGACCGGCGCCACGCCGGACATCTCGATCACCGCC
CGAGTAGTTCTCTATATGCTTCCATAGCTTTGGCGGTTTGCTGTACTGTATACCCTCCACCT
GGTGTTGCCTTGGTAGTTACACTGACAGTTAGACCGGTGACGAGTGAACTCACCATTGTTCC
GTCCGTCGCCGTCATCGATGACGGCAGCCTGTACGGCCAAGGGACTCGCCGATCTGGTCACC
AAAATTATAAGGTATTTTCAGGTTACCTCTATAAGCGAGTTAAGTCCGAGCTATAGTCGGCC
GAGTTTTTAAGGATTGCCATTTTGCCTGCAGCGGTTTCGGCGTTCTTTGCTGCAGCGCCGCC
AAGGTAAATACTGAAGTCCACTTAATTTTCATACAAAATCTTCCTCTATTTGAAAGTTGTCC
GGTTTGCGGAAATTTGCGCTTTCAAGGATTGCTGGCCAAAAAAGAGCATGGAAATAAATAAT
AGATTAGCCATTATCCCTCAGCGCCAGTTGTTAGCGAAACCACCTCTACGAACAGCTTTTTT
TTCTTTCTTTTGTTGTCGTTGTTGGAATTTGAATAATCGGAATCTCATTTGTCTGTTCACCT
GCTCAAGCTCCTCGTGGTAGACGAGGCACAAGACCTGACCCCACTCCAGTGGAAGATGGTCG
TATTCCTGGTGCTGATCAGATCCTTAAGACCGCAGAAATGTTCTAATAATTTCGTGAACATG
GGGCTCAGAAGGCACGCTGGATGATTCCGAACCGACCGACCTCCATTACACCGTGCAGAACA
AAATAATTCATTTAGGGCTTCAATTTTCTGTTTTTTACCCACGAACACATCATAGCAGTGTT
AAAGGAATAAAACATGAAATTTATCAACCTGAAGGCAATAGATATTATGCCGTTGAAGATTT
TACTAAACGTCATAGGTGCGCCACTAGCAGTGTAGGATTCTAATATGGTGCCATTTGCCCCT
GTGAGTTTTCCGGGCAAGTTTTTCAATCCATTTTTGACTGCATGAACATTTGTAGTGCCGAC
CTTTGACGATTTAATTAAGGTTGACTAATACCATTTTTTATAATAAGCTATGTCTATGACTG
TATTGCCATAATAATTATTATACAACAATAATGTCAAAAAGAAAGTGTTTGGTTAATTTTAT
GATTGATTTTTCCGGTCATAGGCAAGTTTTGCTGCATTATTGGCCCAACTTAACAGATTGCG
GCTTTCTTTTAAACTCTTCAATCAAATGCCTGTGCTATTTTAAATTGTTGTGAACTATTTGT
TGTCTCATCGGGATTGCGTTGACAAGTTTTAATGTCTATCCGTTGAACATTTTGTTTGGGTT
AATGTGCCGTCTGTATTTTCTAATTGTATATGCCATTCTTTATTCCTTAAGCGACTAGTCTT
TACTAAACGTCATAGGTGCGCCACTAGCAGTGTAGGATTCTAATATGGTGCCATTTGCCCCT
AATCGTCTTACAACCCATATGCTGTATCTAAAGTAGGCGCTCAAGGTGTCTTCCAACTAATG
TACCAATACTAACCCAAGCTACCATCGTCGCAATAGCAGATTGTCCAATATTTTGCAATATG
CCGCCGACGCCGACGACCGGCGCGCCACTCGCGACGACGGTGCCGGTAATCGTGGCGCTGCG
TCGAAGTACTTTGGAAAGGTAGGCATCAGGACAAACTCAAAATAAGCAATAGAAAGCTATTT
CTTGCACAAGCGCACAACAATGCAGACAAGAACAATCCAGCTGCACTGACTTTAAGAGTATT
GATTCCATGTAGGTGCATTATAGTTTTGATTTACAAAACTTTTTCCCATTGTGAACCTTGTG
TCATTATAGAAGTCTAAATACACTTGACAGTCGTAGGCCATTCTGTGCCGGTTTCTTCTGTG
CAAGGAATGTTCGGAGTTTCGGAAGCTTGGGGCGATGACGACGAAGATGATGACGTCGCAAG
AGTTCAAAATGAAATGTTAAAGATTTTGTTAAGCCAATATTAGTTCACGGTGGCGATGGTGT
CACGGCCATGCAGAACATGACGCCCAGAGCAAAAGGCGCGGGCCAGCGTTGAACTGTTCGAC
CGCTTGCGAACATATGGTGCGCCCATACAGATACCGATAGTGCAGCAATTGCGATAGTTTGC
ACGCATTCTCAACAGTGATGTCAACCGTGTGGGTTATCCTGTAGAGTTCCTTGCAGGAGTCA
CAAGCTGATCTTTAAGAAACTCGATGACATTTTCAGTCTTTTTAGTCCGACATTAGTGAAAT
GAGCTACCATGTCCAACACTGTGGGTAATAACGGAAAGATACATCCAAACCCCTGTCGGGAC
AGTTAGCTGCGCCTGATGTTGGGGTAAATTGTGTAGTAATTTGGACAGTTGATTGTCCTATG
TTCTTCATCAGACCACATTGAATTCACCAATAAAATTTCGCCCCTGTTTTTAGGATTAAATA
GAAAAAGTACAAGCAATTATTTCAGCTGGTCATTGATAAAATCAGCCCATTGTTTGGCCTCA
CGCCAGGAGACGGATGGTATCGATCGACCGCTTGACGGCACACTCACAACTCATGACACCTC
CCTGACTCATTTAAAAGCTGGCTGTGGATTTCCAAGTGTTAATGGACTTGTCCAAAAGCTGG
GGCGTCGTCGATCAGCGGACGCATGCCCGACGCAATCGCCACTTGGCGCAAGTCGGCGGCGG
AATTGAAAACGCCATTCGAGACTTGGGGGGTCGTTTTGGTTGAATCAAGACAAGAGATTTTC
AACAGGCTCTCTGACTAAAGATCCATTCCAAAATATGACAGTCCATTAAAGTCTAAACCAGT
CCGAAAACCGGTCGAAATCCTGCGAGACCGCTGGGCGTTCCCACATTACGCTCAGACCGTCG
AAGTATTCACGAGTCTTTTACACTTACACTCAAACTAATAGCAAAATGAAATTGGCAGTGAG
GAAAAGAAATAGAAATCATGAAGCGGGCTGTGGGAATCGATTACGGGCTCTTTGAATTCGGC
CAATTATTTTGCTTCTTTGATTTAGCGTTAGTCCAACTAGCCATGATGCTTGGTAGGTCTCG
GATGTGGTCCCCGAATGTGCAGTCCCGCAACGGCACGAAGATCGACCTTGTTCCTTCCTGCA
ATAGATATTTATGTCAGTTTATCTATCGGTAACTTTAACCGAAACTTTGTATGAGCGACCAA
AGCCGATGAAAAAAAGAATAACGCTCGAGAAAATCTTAAGCCATAGATGCTGGCTTTTTTCG
GCTGAACAAATCGAAGCGATCCGTCGCCGGACCGCCGCTACAGTGGTTCATGCTTGGCACGG
GCAGCTATCGTGGCGCCCTTGCAACTGCCGGTCGGGCGCTCACCGCCTTGCTCGGCGCACCG
GCCAAAGTAAGGAATGACCAAGCGCTTACTGTCTTTTCTAAGAACTCACTGTTAGCAATAGG
TAGTAATTAATTTTATTGAATTTCAATTTGTAATTAATTTTATTGACTGTCAATTAGCTATT
CACGGAATGGGGATTCCCAACTACTCTAACGCTATGTGGAGCATCAGCAATGTCTATTTATT
AAGTGGCAGTCGAAGTGGGTCCTATTCGATACATTGCTATGTTGTTTACTGATGCAAATGAC
GACAAGGGTGATTGGTCAAACGGTGGTGGTCGATAACAAACCAGGCGCTAGCGGAAATATTG
GACGTTTATTTTGACCTGTGAGGAACTCTGAGCTAGAAAATGGTATCAACATAGCTACCCCA
CAGGGCAAAACCAATTATTTAAGAGTTGTGTCAAACGCTTATGCGTTTTTATTAAAGTGGTG
CTGAAGACAATTTGTGTATATAGAGATTGATTTAAAGCATCATTAGTTCCCAACCCCCCTCC
GAAAACAGCGGGCTAAGCTACAAGTGGATCAGCTCAGTGTCGGGGGTGCCGGATCGAATAGT
GATCCGAAAGCGACGCGCGGCGTGAAATACATTTACGCGAACGGCGTGGAGATGATCCACGG
GACACTTCAAGTATCCGTTGTTTCCTTTCCTTAATGGAAGTGTAACACCAACACTTTTGTCTT
CAGGTCGATCTCGTCCATCAACAGTGCCAATTCCAGCTCCTCCTTCTGTTCCCGCAGCGAGAG
CATTCAAGTTCAACCTCATACTTTTCTGCTAACTTCTTTAGGTTCTCAATATTCTTTACAACT
AAGGCCATGATGGGCGCGGATATGAGTTTTCATGATGTAGAAAACAAAAGCCTTGAAGCTGGC
AAAGCTTCTCGGGTCTTTGCCGTTCTCGTGTTCAGCCATAGCTAACGCAAGGTCACGGCGGAC
GATGCTTCGCGGGCTTTTGGTATTCGTTGTTCCACTGCTCCGCAAGAATCGCGAACTCGGGCT
GAAGGTATGCGTGAGCATGTCGAAGACGAATCCGTTGATTTAATTTTTACGGACCCCCCTTAT
TCGCCATTCTTTAAACTTTTCAAATTCATCTGGCGTCATTTTGTTGGTATCTGGCATACCGGT
AATACCTCGTCAAGAAACGTAATTTGGGAAACTTTCTGTACTAATTCTGCAGTGACTTTTTGG
GATTGTAAGCGTAAATATAATGAAGAAATCGAGAGAAGGTGGCTGAATATAACCGCAAATGGC
CCAGTTGTCTACGTATTCTACTACGTATTCCTCTAAGCTAATGCAGTCGTCCCACTCGTATTG
CAGGCCAAATCTAACGCTCATTCTTTATCGCGTCGTGAATTTTTGCGCACCACCGCCGTCGCT
TGTTGCCATGTTTTATTCTCCTGTATCTTTATTTATCTTTTAAATGAGTGTGTCTCCACACTC
AATTCATGGTCACTTTTCAAATACCTTTTCCCGCTACAAGTTAGAGGGAGCAAGATTTAAACT
GGTCGACTGCAGGCCCACAAACCGACTTATAGTGCTCCCACGACCCTCTTTTCCACACATCCT
GAGCGAATTTCTCGCGAATATGAGTCACGAGATCCGCACCCCCATGAACGGTGTGATTGGTAT
GTCATCGATCCGAAAAAAGTCACCCGCAGCGCGCTCCAGAACGCGGCCAGCGTTTCCGGCCTG
CACTGGAAACAGCATACGACTACAAACCCGGTAATTTGATACTTTTCAACTCAAACCAATTAC
TAGGGTCGTTGCAAGCTCTAACCGAACCAAAAGACAATTTCTTCTCAATGCAATGAATCGTCA
AGCTGAACGAGAACGCCGCCGTGATGTCGCCGCGCTACGCGACCGTCAACCCGGCTGCGAACG
TCGCAAGCGCGGAATGGTCAATCTCAGCGCCAACATTGCATTCCTGCCTTGCATCAGCAAGGT
TCGCAAGCGCGGAATGGTCAATCTCAGCGCCAACATTGCATTCCTGCCTTGCATCAGCAAGGT
CATATCAGCGCCCCGCGGGCTTGCAGGCGTCCAGGGCCGGGCACAAGGCGCCCGGGGGCATCG
TTCGCCCCTGCCGAGTATATCCAGACAGCTAGAGCGCAATGCTGCCGTTAAGAAGATCGACCG
AATATCCTGCCAATACTAAGAGTTGGATTTATGGTAAAGACACTAGTGATAACTTTAGTCCTT
CTCTTGCGTCCTGCTCTTGACATAATGGGCCTTTCTCGCGCGCGGGTATGCGTAGCTATCACC
CCGACGCTGACGTTGCGCCGGATGCCGTCCACTACGTCCTGGAACACTTCGGATGCCCTGACG
GATGCCAGTTTCGAAAGGGCTTATCCCTTCGCCGAAACCATTCTCCTCGGAACCATTGCCCTG
TGGTCGGCGAGGTAGCTGCTTGCAGCTACCGAGGGGGCGAAGCTTGCAGCCGACAGACCGCCG
GACCACACACCATCGTAGATGAGACCTGCAACAAGCTGCTTTGCATTGCTAATTGTAAAATCT
AAGGGGAACTGCTCGATCCGAACGGCCTGGGAGGGCACGAGTCCTCGCTGCACGGATTTCACT
CAGCCGTATCCCAAAACTAAATTTGAATCATATTTTAATTAACTAAAAAATATAATTTTTGTC
CAATAGACTGATTTCATCCCAGCAATAATTCTTAGCTGGAACTAATGTCCAGTTTCTATTTGC
CTGCCTCATCAAAAGCATCTGATGAATTAATAGGGCAACCCATAGCTTCTAAACCTTTAAATG
CATCAAAGATGTAAAACAAAATATACCCAACGACCACCACAAAATATCAGCTACCTGATTCAT
CATCGCGGTTGGGTTGGAAGAAGATATCAAGAAGGAATTTGCGGGAAGCGAAACGGTCGACTG
TGTTGCTACCCATAGACCTGTAACATACGCTCAACCATTTAGTGGAAATGTGCAAGAAAACCT
CCAGTTATGAATATTCCGATGTGTTCGGAATGTAATTGCACAATTGGTATTTTAGCGTCGTTG
AGGGCAAAAATGGGAAAAGTCGCGAGCGCACTCGCGGATTTTTCTATTATCACCAACGATAAT
CGGTGATTTGTTGAAGAAAAAAATCTGACATTGAAACAAAATGCAATGCAAGCGTTAATTCTT
TAAAAGGCCATTCATTTTCTTGACCATAAGCTGCTACTAAATAACCAACTACAAAAGATAATG
GGAGCGAATTGACGCCCGCGCCTTCCTCGCTGTAGTGGAATATGGCGTCCGGTGTGTAGTCGT
GCCTTCCTTGTTTATTCGCCACTACGAATACGAGGCCCAAGGTCAATTGGATTACTTTATTTC
ATGACCTTGGATTATCTGCGGCGCTGTTTTGTCGACGAACCTTTCCGGGTTCTGGCCGGCTTT
GGTACATCAATATTAGTTCAAAATCCGGATTTAGTTCCAATCCTTTCTTTAATACCGAGTCGG
GTCGCTATGACCGCCGGTCCGAAAACGGCCAGCAGGCCGACCAGCGCGAACCCTGAGACACGC
GTGGCATATTGTGAAGTTGTGTCTGTGTTTTATGGATTACACAAAAGTTGTGTCTGTGTTTAT
GAAGGCCAACTTGGTACTATTAATTCAAACTACCAAAGGGCTGCTGGAGATTATGCTACGTAT
AAAGCGAATTTCATCGACGTTGCCTTGCGCTACTTCGCCTCCACCCGGTTTAACGAAGAGGTG
CCTTAAGTTCATCATTACTCGAAGCACTGCTTATATCAGACTTATCCGAATCAAACGTCACTC
GCCAGCTTCTCCACCAGGAGAAACCGGCGTTGTGTCGGGTTTTGCGTATTCCGCGCCGGGATT
CCACCATACTCATGGCCTTGGATGGGGCCGGCCATGCGGAATGGTTTGCCGACTATGCGCAGT
AAGGGAAGCCGCGGCTTCCCTTTTTGTGCCCGGGCACAACGGGCATGACGCCGGCATTTTTTG
GATCAAGCGACTTGCCTTGTAGCAGCCTGTCTAGCCTCTGTGTGCCGTGAAATAATCAATAGC
GCGCCAGCAAGCTGTACATCATGTCAGCCACCTGCAATTGGTGTGTCAGGCCCTTTGGTTTCG
GAAAGCGATTAAAGATGCTAATGAAGAGATCAACGAGGCCGTCTCGTTGCCCAAACCTAAAGC
ACTGTTGTTTCATTCTTGGTGATCTTGTCGACCGTAGGAAATTTATCAACTATTAATACAGCG
AAAGGCATAATAGGCGTTTGGCAAATTGGCTTTAGCCCATTCAACAGGCACAAACTGACGACT
CCAGCAATATGATTACGCCTCAACAATTTGACGCGATAAAGCGTGACGCGATACAAATGCAAG
AATTCCCGTTTCGGCGACCGTCAAAAAGCATCATAGCCATTTCGCGGCTATTTTCTCGATATT
CATGAGCAAGCTAGAATTATTGATGTTCAGCTTATGCTCAACTTTGGAAGCCCAATCATAACC
TGCCGCCGCCGCCGCCCTGCCCCCTGCCCCGCTCCCCCCAGCAGCAGCCCTCGCCGGTGCAGT
CGCACAGGATTGGGACGCCAGCCATCATGACGAACTAGTTCCTTTCCACCTTTTCGCCACCTT
TGCAAAGTGTTAGGACGAGAAAAAACATTTACAGCATTTATCAAAAATGCTCTACAAAAAACT
AACCACCACCACCTCCGTGACCACCATGACCAGATGATCCTGTTGAGCCTGTAGATCCTGTTG
ATCAAAAAATAGTATTGAAAAATTATTCCGTCGCAAACCATTGAAATGATACTGCATCATGCT
CAAGTTACCTATTACAAATTAATCTCAATCATTGTTCTAGTGTTTGGTAATCTATTTTGAAGG
GGCAGCTCGCGCACGTTGAAAAATACAGGTCAGGAAGCCTACAACCATGCCCAGTATCTGCCT
CCGCTTTTCCGTGACCTCGGAGGAAACGATTTGAACGCCGGCGTTGATCATCGGAGGGACGAG
CCATCCCGCCCACTCCGCGCGAAGGCGATATCGAAGAAACCCACGACCCCCAACAGCGCAAAG
TTAGAACCAAAATAGTCGACAAGAAAATACTTCTTCATCATACAATTCACAACCGAACTTTCC
GAGCGCTTTAGTTTCATGAGTTGACCTTTCTTTGGCTACTAATTAATACTATCAGATTAGACT
ATAATGACTTACAATCATTGAAGCTCCAAAAATTACAAAGAATATTTTTTTTATTATTTAAAG
GAAGACAAACTGGACGACCGGGAGTGGCTCAGCGACCTTATACGGATAACGGCGCGCGAACTG
CATAGAACTGCTGGCCGACGTCAATTCCCTCCGGTGCAGCAATCTGCACCAGTCCACGCTGTG
CGTCATCGTCGACATGGCGGCCGAACAGGGCGGCAATTGCGAGCTGACCGAGCCGGGCCAGGC
AAAATTTAAAACCCAATGAAAATCAACGATTTGGAGACAATACATGTCGCGTCAACAAAGAAG
TAATAGAGTAACTGCTTCTGCTGGAACGGCGGCTGGTACCTTGGTTGGCACTGCAAGAATTAG
CATGTTAAATAACTTCACAGACGATCTGCTACAGCCATGGCAGGAGCTCTGTAATATGAATCA
GCGCAACCTCCTCCGCCTGCGTCAATCCGGTGTCGGTCATGACGAGGACTTCCTGGCCGGTTT
AACGATCCACGCGGGGATGAGAAGTTGTAATAACTTTCATACACGCGTTTCTATCGGTCGGTC
TTCTTTCGTTTGCTTTCCATGTCGTTTCTTATCCTTATATGTCGTTCTTTTAAACCTAGTTAG
CAATACCATGCTGACGGATGTCTGCTTCGGCAGCGTCGATCGCCTGCATGGCCGACATGTTCT
GGTCGATTTCGGCAGAAATTCAATCGCGTGAATCGTTATCGCGGGAGAGTTGGTGACATTATT
TTGCACGTGAAATCATTCGTTTCAACTATGCAACAACTGCATTGGCTTATGATGAATCGGTAG
CAGTCATTGTCGGGCTGGTCGCAACCGGAAATACACAGCCGATCCAAAGTGAAGAATACGAGT
GGGTTATGTGGTTATACCAGATGAGCAGAAGAAAAGATGAAATGATGATATTTGGATGATAAG
CTCCCAGACCGTGCCCTCGTTGCACTCGCCGTCGCTCAGGCAGACAAAGACCCGAAAATCCTG
TGTAGATTTAGTTGTTATCCTTGTGCTGTGTCATACTTGGGTGGAAGAAAATTCAGACCTCGT
GATCGGCCTTGAGCCGACCCCTGACGAGTTCGTGGCTGCGGCTGGTCGGCGTGTTCCGTGAGG
TGTTCTCGGACATGTGGTGCCTTTCTGGGACGAGGTGGGGTGCGTGAGGGGGCTCGCTTCTAG
TCCATCGCCCGCCGCATCACCGACTACTTGGACAAGGTATCAGACGCCGCCGAAGCCCGCATC
GGCATCAAAGTAGGTATGTTGGAAGAAGCTCGTGCAGCTCGTATCCGTATCAGCACTTCTGCT
GATTCAAATAATGCGGAAGCAATTGTTGCGAGTGGGTTGGATCAGTTAATTATTTCAGTTGAT
GGTCGACTGCAGGCCCACAAACCGACTTATAGTGCTCCCACGACCCTCTTTTCCACACATCCT
TGCGTGTCTGACAGATCGCGTGCCAGCACTTACCATGTTGCCCGCCAGAATCGGATAGCCCGA
AATTACCAACAGATTACTCAAGTTTATTTGGACCTCAATACGAAAGGCTAAGAAATTAATTTT
CGTTTGCAGGCGGCGATGGCTTCAGCCAGCAGTTTCTTGACCGCCGGGTTGCGTTCGTCGAAT
GGGCCCGGCCCAACAGAGACGAATCGAGTTCCGGTCTAGTTGGGCGTTCTGATTAGTTGGGGG
CAATTAAAGACGCTGGTGCATGGGACGATACAGATAAACGAAATAAATGATCCGCGCATACGC
TGGTATCATTCCTATTGCAAGATTTCTAAGGTACCATGGGCTATTAACAGGAACAAAGAGTAT
CTTTTGCATAATTTGGGATAACTGCGTTTTCATTAAGCTTCTTTATTCGTACTTTCATTTTCT
GGGGTAATTGTTAGTAGGTGATTGATCTATGTTTATTATTACACTCATATTATTCTGGTTGTT
AGCCCTTCGTGATGGTGGCGGTGCAGCCAGATAGCGCGGCCAGATCGACCGTTGCCGTCCGTG
GGTTCGCGTCGAAGTGATCATGATCGTGGGATTGATTGCGGTGGGCCGACACGTCATCCAGAT
CGCATCAAAATAACGCGGGCGATCCGCCTCGCTAGACATGCGGATCATGTCGGCGGAAAGACT
GCGATCAAATACGTGCAATCAACTTTGGCGGAAATGCTTTTGCGTTATTGGGCCAACAAGGTT
GGAGCGCGTGGGTGTGTTCACGCCGAAGCGCCTGGAGATCCCGGAATTGAACCCCGGTCGGAG
GGTTGTTATATATGCTAATAGAGAGAGGAGAGAGGGGAGAGAGGGTTGTTATAAATAGTTGTT
CACATTCTGCCCAACGCGCTGGCGTCCATTCTGGTTGCGGCTACCCTCGGCATTGCCGGCGCG
TCAACAATGGCCATGACAGCAACTACGCTGGCGGCGACGGCAAGCAACTGTTTGCAACAGATC
GGATGGTTATGGGGAGCCATCAACCAGCAGCGCAGCGACGCTTACCGTGCTTCCAAGACTTGG
GATCAAGAAACGACGGGCGAGTTTGTTCGTTATCTTATTTTGGGGTCAGGCGTCATAACCAGC
CAAGCAGACGTGTTACAAGGTCGCCAAGAGTTATATGGTGGGGGACAATAGATTTCAGCTTGG
CAATCACGTTACCAGGAACGCCAACCTTGCCAGCCGCCACCACCGCGCTAATCAGCGCGCGTT
GACATAGACCAGGAGACCGGTAACCTGCTTATTAAAATAATTGGACAAATGCACCTGCTATCT
AAAGCTTCTCGGGTCTTTGCCGTTCTCGTGTTCAGCCATAGCTAACGCAAGGTCACGGCGGAC
CAAGGAAGCACGGGACGAAAGCACGAATGGAGGAGATGCAGCCCTCCTACAGTCTGGACAACT
GGGGATGAGGTAGGTTTTATTCAACTTGAGCCATGGTTTGTGCTGCCGCAGTCACTTCGACTT
CATCCGCGCGGTCGCCGAGCCGGAAGGCGGGTTTGTGGGGCATATCGGCGGCGATGACTTCAT
TACTTTCTAAAGGTTAGAAGTCCAGTAATATGAATTTTCTACTACATCACCAGCAGTACCTTT
AGAGCTAATCAGGTATAACAGGAAAGGAAATTTTGACTCTGTAATGGCACTGATTCAAGCTAT
AACGGCACGTTCCAGTTCGAAAGTCCGGGAATGCAAAAATACTTACGTGAATTAAAGCCCGAT
ATAATATCCACTCTTTCAACGCAACTGGATACGAAAATGGCTAAGATCACCAAAGCAACTCTG
GCACGAAGCACTCCGTCAGCGAGTTGGATGCAAGGCGGTTGGCGCCGTGCAGCCCGGTGCACG
CCTTTTTTCCTCCGATTGTGCCGCACCCATCCGCAGCACAATATGGTGTTTACCGGGTGTCAC
GAAGTACGCCGGTTTCGATCCGTAGGTGTTGAGCATCTTGGCGGTCAGGAGATCGACGAGCAC
CGTTTTCGGTGGCGTTGCTTTAGGTTTTGCTGGTGCTTCGCTTACGCGGGCTTCCAGTTTCCC
AGGTCAATCTTTATTAAACCCAGAGTTTATGAAGAATCTGACCATGTCTAACCTTCAAATGCT
GCCAACGCGAGCGCGGTGTACGCGCACTCCATCGCGTGCGAGGCGTCGTAACGAGCGTCCATG
GTGGCAGGTCGATTTTAAAATGATGCCTGACGGTTGCCGGCCCTGAATCCAGGATGAAGATAT
GGTGATAGCCGGGGGAAAGGACGACTACCTGTCCAACACAGTCCTCGGCCATCGCTTCGAAAG
GACGGTAAGTGTATTTTTATTATCAGTAGAGACACATTTACCCTAGATAGCAATATTAATCCT
AGCGCTTTTGTAGTCGCGAGTGGTTGGGAGTGGGGATTTCTTAACCCGGTGCAGTGGTGATTT
CGCGGCCAGGTCGCGCGTGAGCTGCGCGGCAAAGACCCTGCCTTCGGTTGAAATGGTGGCCAT
TGGTATCATTCCTATTGCAAGATTTCTAAGGTACCATGGGCTATTAACAGGAACAAAGAGTAT
TAAGAGCATTTATGAAGTCAGCCAAGTTTATTGATTTCTTTGGGACCAATAAAGAGCTTGTAG
CGGTGGTAATGGGGGAGTTTATAGTGCTACAGGTTCAGCAGGTGGTGGTGGCGCAGGATTTGC
GAAGGCAAACCGAGGTCAGGTGCGACAGCAAAATACAAATCGGCGATGCGGTCGTACAGCGCT
GATGATCAGAACAAGATGAAGCGCGCGTTGCTCGACCACTGCAAAGAGCACGGCGTCGATAGT
CATTTGAACATACATTTGTTTGTTTTGCATAAATTTTTGATTCAAAGTTGGGTCTTTTGCAAT
GTCCGCCGCTTTGGTTGTCTTCGCGGTACGCGAGCAGCGAAGCCATGCCGTACATCTTGTCGG
ACGGTCCGACTCCAATAGATCGCGTCCACCCGGCCGACGTGACGGCCACCCTTCTCGCGTACG
CCAGCCTCCTCGGAAGATTAAATCATTACCGGCGTGACTAATATAAATCTGAGCCTGACTACT
CAATCACGTTACCAGGAACGCCAACCTTGCCAGCCGCCACCACCGCGCTAATCAGCGCGCGTT
CCATCGAGCGGGAGAAAACCACCCTGGTCTGGCTGAAAAGCGACGACTTCCCCAACGCCTATG
GATATCTGGACGACAACGACCTCACGTACATCTTCCTGAACAAGTACTCGTCCTTCGTTCCCT
TGAGTGAAAAGACGCTATTAGCCGGCTGCAATTTGCTAATGATATCAACACTGAGCTTGTTAT
TGAAAATGTCAGTCAGATTCGTCAAGACCACCATGGATGACTTTATTTCACTTCATCAACTTT
CTTAGTTCAGCATTTTTCTGCGTAACTTCATATACGTATCCTCGTGCCTGCTTTTACTGTAAT
GGGGGGAAAGGCAGGAAAGTTCCAAAAGTCCTCTCTCTCTCTCTCTCTCTATATCTATATATT
ATGATCATAAATTTTGAAAAGATGAAAAAAATACAGACTGAAGTTTTTCGCTCAATTCTTTTG
GCGGTCGATCGCCGGCATCGGGAACACCTTGCTGGCCCCGACCGGCTGGATGAACTCGGCCAT
GCTCAAACTAGAAAATCTCACTTTAACTCATCAAATATTAATCTGCTCCAGCAATCTCTGGCT
TCTACATCTGTTGCATCAATATCTCTTACATCTGAACTTATTCTTTTAAGGTCTGATGTTTTG
CAGCTACACCATCTCGGTGATGGGCAGCGGCTTCTTCTCCGCTCCGCTGGCCAGCGAGCAGGT
GCGGCGTTAATAAACCGTGAAACGAAACTACGCCCTGAATATCAGCGCCGGTTCTAGCCAAAT
CCGACGCTGACGTTGCGCCGGATGCCGTCCACTACGTCCTGGAACACTTCGGATGCCCTGACG
TTGGACAAAGTGGAGAAAATGTAAAGAAGATTTATACGAAATCGTTACAAAGTAGATATTTAT
TATCCTACAAATCGTTGGACACGCCACTAAAACAAACGCAAATGATAGGTGATTTAATTTTAA
CAGCACCAATGATGTTCTCAGGCAAAATTATATACTTGTCAGTTTTTGTTTGCTCTGTAATCT
AACAGGGTGACAGTCAGGTTAGGATACGGCGAACCGACTTTTTCCTGGTTATGAATAATTTTG
[truncated: 7,198 more rows]

## Sheet: sequence length 101-150
CACTTCTTACAAAACTTGCCAACGAACGTGAGGCTAAAGAAGCGGCTACGTAAAGACAAAACGTTTGGCAGACCGTGAAGGTAAAGAGAATCAACAACGCG
GATTTCATCAAGCTCCGTCATCAAGCTCGCCCGGGAACATTGGCTCGGCTGGTGTCAGGTCGGCCTCGGGTATGTCATAGGCCTGTGGCATGTCGGCTGGC
GGTGAATGAATGGCTCAAGATGGGCATCATTCAGCCCGCCCACAGTCGCTTTAACTCCCCGATTTTTGTTGTTCCCAAAAAGATGGTTCTATGCGTTTTGT
TCTTGTCCACGGGACGGGTCGAGATGCCTTCCGGGCCTCGGCCCATCGGCGTGCCTTCAGCCCGCTTGACCGGGATCTTGGCGCCAGCTTTGCGGGCTTCG
AAACTATTGGCTACTATTAAAGACAAAGAACAACGTCGTGCATTTAAAGCAGCGATGATTGGTGCTGAAGTCGATTATGCAGCAAACAAAAAGAAAGCATT
CAGCGCATAAATCCGGCATGCTTTTTGCAGCTTGATTTCGAAGTGAACGGCTGACGATAGCTCGGAATTAACTCGCTTATAGAGGTAACCTGAAAATACCT
TAGTTGATCGTTTAGGTATAGTATACATTCGCCGGTGAATGTCAACTTAGTTTATGTAAACACTACGACCATCATGTTGACATATAGAAAAGGTCAGAGTT
GGAGGAAGCGCGCGCGAGCGACCGGGTCGCCAAGATCCGACTGCCCGAGCCGGCAGCGTGCGGCAAGACGCCGCTCAGTGCCCGGGGCCTCTCGCGCTCCT
CCGAAACTCGAAATCCCAAACCGTGCCGGAGGTTCTGGCGTTAATCCGCTTGAAGCACTCGACTTTGGCTCATTTTTGGATTTTACACTTCGGAATTCGGG
GCGGCCCTTTTGTGACTGTAACAACCTCAATCATACCTTGCCCCATTGATCTGACGAAATATCGCCGCCTGTCAGTCGTTCGATTCGCTCTGCGACGTGTT
CCCGACATCTCGGGTCCGACGGTCCGCAGCTCGTCCTCGAGTTCGGCGGCACATCTCTCCGCGTCGCCGCCTCGGCCGATGATCTCGCCGCAGCGGAACGG
TCCCGCCGAGCGCGGGTTTTTTCTGGACCCAGGCTTGAATTCGGGTCCAATCACTAGGCTGCCCAGGGCTGGGATCAACTGACGTACAGAGGGCAACTCGG
GGAGGAAGCGCGCGCGAGCGACCGGGTCGCCAAGATCCGACTGCCCGAGCCGGCAGCGTGCGGCAAGACGCCGCTCAGTGCCCGGGGCCTCTCGCGCTCCT
GATTCGGCGAACGCCGACGCAGCGAACAACAGGGCGAGGAAGGAGAGGAGGCGCATGATTCAACGAGAGGACTTGATGGGTGCTGGTTCGAAGTCGGTCTT
TTGGCAAACTAAAGTCTCGTACTGTTGAGAAAGATGGCGGCAAGCACACTTACTTCGATGTTAACGTGGATTCACTAGCTGTGGATGTTAAACGTTCAGCG
TATTTGAAGTTGAAGTAGGGGTAATTCTTTCATATACTCTGTTTAACTTGGTCATTTGGAATTTGTACCTTGTTCAAAAACATGATCCTTTACTTTACCTT
CTACTGACCATGTGTATGTGTTCATTTAATTCTCCTATTATTTAGCTTCTAGTAATGCAATGCGTTTGCGTAGTGATTGAACTTCTGCCCATAACACAGAG
GCCTCAATTTTAATTAATTCAGTTGATTTATGAATTTTCTGACGAAATTTTAAGTTGGTATCAAATCAATAAAAGGGACTTGCCTTGGAGGGGAATAAAAG
CCGTGCTGGCCGCCCTTGTTGGCGCTATTCATGCCGACGACGAAAGCGTCTGCGGGGACTTCCATGAACTCGCGGGTGGCGAGGTTGGGCAGGCTGTCGGT
AATATAATTCCATTTGTTTTTCATTTTTAAAACGCTACTCATGCCTTCAATTAAACCAGCCAATTTTTGTTTTAGCTTTAAAATGATTTTCCATTCGGCAT
CTAACACTCAAACTCCAACAAATACTCAAACTCCAACAGAGACTCCCACAAACACACCAACAAATACTCCGAGCGAGACTCCAACAAACACACCAACTGAG
TCAGGTAATTCAGGGGTGACACCTGTTGGCACGCAAACATCAATATTAACCATAAAGAACCAAAGAGATACGCAACAAAATTCCAGCAGATTTTGGCCCTC
CTGGCGCGCTACAATGTCAACCTATACAGGGGGTTGTTTGCACGATTGTGTATATTGCGATGGTCGCAGCGAAAAATATCAGGTGAACGGAAATTTTGGAG
TAATCAATTCTTTCAGTTGTGTTTGCGGAATATGTATTTCTTGCTGTTGAACTAAATAAGACATTCCATTTGTTTTTAACAACTCCAAATGATAAATTACC
GGCTTGGCCACCAGTGACTGTCATTGGCATTGAGAATGTAATCGGAACGGGTTACCCACGGCCGACGATCGCCGGGAATGCTGCCACTCCAGTCACACTGT
CCCTAAAAGAGAAGCATTTTCAGAACAAATAGACTCATAAATTTCAACCAATCAAATTGACCTTGAATGGCTTGCTTCTAGATCCACTTAACCTTTTTGGT
AGGGGGCTTCGGCCCTCTTTTTACTCTTGACATTCGGGTACAACCATGATACAATATAGTTTTAGGAGAATAAAATGACTATTGGAATATACTGTATCAGG
CGGTTGTAAGTGGCATAATTTGCACATTTTGGTCTACAATGTTTGTATGAGATGTAGGGAACACCACTCTAACTTTGAATGCAGATGTACCACCTGCAATT
GCCGGAGAGGGGTATCCAGGGACTTGAACGGCTCATCCATCAGCAGCAGATCGTGCGGGTAGGCAAAAGCGCGGCACAATGCCAGCCGCTGTTTCATCCCG
GAATGACCATGACCTAGTGAATGTGCATCCATCTTCTTATAGTTGGATCTATTGATATCACCAAGTTTGCCCTTGCCGTGAAGTTCGTTGATATTCTCTTC
ATCTGGGCTTCGAGGCTCTTGGGCACGGGAGTCTGTGCCCAGAGCACCACCGCCGTCAGGCACGAAGCGCTTCCGCATAGAGTTCTCAGGAACATGGAAGG
CAGGTAAGCTAGAGCTAATGGCTCGCATCTTTGCTGAAACAGGTGTTAAATCATTATTCCGTGGCATCTTGCATCTACTATGCAAATACCAAAACCAAGCT
GATTATTTAAAAAAAAAGTTGCAATACAAAAAAAGTGTGTTAGATTAGTTTTGTAATCAGAAATAAGGAATAAATACACAACCGGCCGCGGCCATCAAAAT
GAATGGCCGGATGCATCGCCGCTCGAGGCTCTGGTGGACTGTGCCGAAAAGGAATCGGGCGATGCAACCAGAATCCTCGCCGTCCGCGGTGTTGCGGCGTT
CATCGTCTCGTCTGCTCTGGTCATGGGACCGGGGCGCGTGTTTGGGAACAGTTTCGATGCGAGTACAACACCTCGGAACTGTCCAGACACAAACAAATCAT
CTTACTACCGTTCCTAAGCCTCCGCCACCTCTAGGAAATAAAACAGTGTAATTTTCACCTATTTTATAAGATGTTGCCGAAATTATTAAAGTTGAATCATT
CGTCTGCAATGTCTGAGTCAATATCAGGGAAGTCATCTCTATCTGGATTAATAAATCGGAAGAATAGAAGTCCATACTTAATCGGATCAATTTCTGTAATT
AGGGCAACGCCCGCGTATCCTGTCGAGCCGGCAGCGGCAAACCGTAGACCCTCGGAGTCGATGAGGTCGGCAACGGCAAGACCGGCAAATGAGGCGGTTAT
AGGGCAACGCCCGCGTATCCTGTCGAGCCGGCAGCGGCAAACCGTAGACCCTCGGAGTCGATGAGGTCGGCAACGGCAAGACCGGCAAATGAGGCGGTTAT
CGTGCGCGTGGACGTCGACACCCCGCCGCCGCTCGCCCCGGCCCCGGTGCCGGAGATCCAGGGCGACGAAGACGACGACGCCGCCGACCAGGACGACACCG
GAAAAATTGGAGTTTTCAACCGAAGAAATTACACTGAACTGGTGATTACTCAAAAATTATTTTGACAAAAAATGATAGAATTGTGAAATCACAGTTTAAAG
AGGTTACCCTGTCCCTCTGTTACCCTGTTACTCTGTTACCCTGTTACTCTGTTACCCTGTCACTATGTTACCCTGTTACTCTTTTACCCTGTTACTCTGTT
CCCAACGACTAATTTCGAAGGCGTCGAACTCGTCTCCCACCGAGTAAAGTTCATCGGGTTTGTAATCAGCTACGAACTGGATTAGGGCGTTCACTGCTTTT
CAGTTCGACAAGCGGACTGCCGAAAAGGCTAACGAACACATCACTTATCTTAAGGCGTTTCGGGAACTCATTTCATACCGAGCGCCATCGAGCGGAGATGC
ATAGAAAAAACTCCCCACACCCCCTCAGTGATTTAAGAAATAAATGCCCTACCATTGGCGCCGAAGGCGCCCACCGAAAAACTTTTTTGGGAATCCGGTTT
TGCTAGTACAGATGGTACTTTTGTTCCTGAAATAGATCAAGAGTCATGGGCCGGTAAGTATAATACAGCACACGCATACACAAAGAAGAAGAAAACATGTT
ACTGATGTCCTTCACCATGGGAAACGCCATCACGCTTGAGGACACCAACGGTAACCGAAAGCTTCTGAAACGGCGTCACGATGAAAAGATCGACAACGTGT
AGGTATCTGTGCCAAGGTATCATCTAAATCTTGTGTACTTCTAACTAATTGTTCTTGAGCGTCTCTTAAACCTTTAATCTTTTTCTCGTTGTCAGCGTATT
GGGCGTACGGTTAATGGCAAACCAACGGTCTCCAAAACCGTGACTGCAGGTTCAAGTCCTGCCGCTCCTGTAGTTTTGGGGCAATGAAGAGGAAGCGATAG
TCATTTGCATAAACTGCATTTATTAATTGCTGTGGTGGAGGTTTTGCTAATGATATACTAACTGAGCCATCATAATAATATCCAGCTTTAGCCTTATCAAC
GATACACGTCCACAGCATCAAGATTTTTAGACTCAATTACAAGACCAGATGCAAAACTGAATTCAGGTAAACTATTGTATATAAATAATATATCACCAATT
AAATATTTATTGTAAAATGTAATTATTACAGGGTGTGCATTAACACAAGTATCTGTTGATAGCATACTAGTTCAATTGGCTGCATTAGATTGGAACAAATT
GATTCTTTGCCAATATTACCGAGTTCTTTATTGTGCTTGGTATTATTGGAACGATTAAGAATGACATTAAACGATTTGTTGAGGATAAAGTTTCTCAAGGT
CTCAGAGTGCGACAACAACTGTGACAGTAACCCAATACTCTTTAGCGACAATCTGCTGTCGCGCACCCAATCATTCGGTATCTGAGTGAAACGGTACTCGT
CGCCCAGTTGTTGACGCCGCCGATGTATTTCCAGGCGTCCTTGGGCCATGTTTCGTAGCCGAATTCACCTGGATGCGGCACGGTGTGGAAGGTCCACACCT
GATACGTTGGCGTGATGTATGCCACATGTTGCCTCTTTAATCCGGTCTCAATAGATATGCTTTGGCTAATTAATGACTTACCAAACCTTCGACCACACATC
AAGGTCGCGCGCATTCCGCCGCCATGGGCTGCGCAGTACACAGAGGAACGGCTCATCGGGCCGGTGCTACGGCGCAATGTGCATCGACCGGCGATGGGTGC
GGTTTTCATTCCATTTGCCTCTTTGCTTTCTCGGTGGTAGAGCTTGGCCGTGGTGCTGTTTTTGCCGATGCCTCTTGGCACAGGTTCAAAAATCACATCCT
GATTTTTCTGTAGAAATCATTGCTGATCGCCCTGCGTCTACTAATTCACGTTTTAAACTGTTTAGGTACGCGTTGAAATTAATCATCTTCTCTTAGCCATT
CATTTGCCCACTCGTAATTATGATTTTTGCCAGTATGGAGATCGTTAGGACAATAACTACAGGCATTCGTACAAATATTATTGATAATCCATGTAAGCTGT
GCTGCTGCAGCAGCTGCAGCTTGCTTCTGCTGCTGCTGCTTGCTGCTGCTGCAGCTTGCTGCTGCTGCAGCAGCTTGCTGCAGCTTGCTGCTAGCTTGCTG
GAGCATGCGGCTTGCGGTAACCGACATGCCTTTCGTGCTCATTATCGCAATATCGAAACGCTCGGCGATTTGTGCCGCTTCGAGCAGCGGGCCAAATCCCT
GAAGTCAACTGATGAAGAATACAAGGTGCAGTTAGACCGCCTAAGCCAAGGGCTAATCCCATCTCTGAATGATATTGGAGCAGTTGCTGCCGCAAAGCATT
GCTCCGCAGCCGAAAACTGCTGCGCCTTAGCCTCGGTATCCTCAAACGCCAAAATCCTTGCCAGATAAGCGTCGAACAGCGAGATCCCAGTCTCCGAATCG
GTTGTATTAGATTACCAGGCAGAGCTGAGTCTCAATGGCCATTTCGGACTGTGGACCAAAGCCGATTCGGTGATCCTGTTTAAAAATTGAAGCAAAAAAAG
CCCAAAGAAACTTGTTTCCAGTTATTTCCTGTTGAAACTGTTTGGACTGGTGAAGAACGTCCTGTAAGAGAATTTGTTCCTAATTGACCATCACCACCCAT
GTTTGTATTCCTAGGTGCTAACATCGATGCGTTCTCAGTCGGTGCAAACTTTGGTATGAATGTCATGAACAGTGTAAACTACAGCACTGCTAACATGGCAC
GGAATCTCTTTCCAATTATTTGCTCCTTGGCCTTGGAACCAATCTAAAATACTACATTCTTTCTAACCAAACCTTCTACGATATCACTCCGATTCGTTTAA
CGGGGCGTCACGGGCGATGTGGACTTGCTCGGGTAGGTCCAGGCAGTCATCCATCGTGAAGCGAACGCTGGGCTGCATGTACTTGGCGACGGTAGCGAGGG
GCTGAGCGGCGTGCCGATCGCGTCTTGCGATTGCGTCATCGTTCCCATCGATTGCGCTTGCGACTGCGCGAACGCCGCAAGATCGACCGAGGGCGCGCCGT
CATTAAAATCTCTTTCCCATGTGAAAAGGTTTTTTAACATTGAAGTCGAGTCCCATCCTGGGGTGGTTTAGTCCCGTAACTGTGCTGTCCCATTAGCCTGT
CGGCGGAAATTATGCCGAGGATTTGTGTTCAATGGCGTTCGCGGATATGAAGCCACGGGGCAAATCGGCTTTATCGTTGGAGGGGTGATCGGTTTAGTCAC
TTGATTAAACCCAACAATATATTCTGCCTTCCTGTCAGGATAGGCTATCTCCGTTACCGGAACTCCCATTTGACCGGTTTTTTGTACCATTTCCTTTGCCG
AGTGCAGGGGAGGAAAGGAGTGAACTGTGGGGAGGACTGCTGGCCTTGGCTGCGGGAGTCACGGGACTGTACTTCGGACTGGACTCGAACTCAATCATGGG
GGAACTCACTATAAATGTATGCTCAGGATCATTAATACACACAAGACAGAAAAATACACCAAAAGTCAACAAAATAGAAAAATCAAAAAACAAAAAGGATG
GCGCGCTGACCAGCTCGCAAGCCGCAGCCCCAGTCGGGCGAGCACCGGGTCGAGAAAAGGATTGCGCAAGCCGGCAGGGGCACGAAAGAACAAGGGGCGCT
CTTCGCGCACATATTCCACTTCCTGCTCCACGGCTTGCTGTGACATGGAGTCTGAAACATCCACGAGAAAAACCACCGCAAGGTTGTTTCCGCTTTGGACG
TGCCTGCCACGGCATTAAGTCAGGACTGGAAAAGCGCGGGATTTTCAGGCACTACACCACGCCGTCCACACGACTACACCGCGCAGGATTATGTTTTCGCC
CTGGAAACCTAAAGGCCATGGCTGGTAAAATAGAAGGTGCCCTTGTAGGGGTGGAATTTGAAATGGTGGTTCCCGGCGTACAGGACCCAGACGACTATGAT
GACGATATTGTGCGCTTTGAGCCTAAGCAGCCCGGTGATGAGGAAGGCGCTAAACAAGCGACTGACTACTGTAATTGGGTGTTCTACAGTCAGAATCCCGG
AAGCTAAGGAAAAACTTTATTTAAATATTTTCACTTTTCGCTTGCAAATTAAAAATTCTAGCTACTCTTTAAATTACTATGAGTAAGACCAAAAAGAAAAC
TAGCTGCTCTGCGTACACTTCAATTAAATGCGCTTTAGCTGTTGCCGATAAATTACCCGCAAGTTTATCTTCTTTTAATTTTGGTTCTGTTGTCAATTTGG
CGTTAGCTGCTGCGCCCCATCCCATAGTCAGATCCTTCCTACCGTGCCGTCAGGGCGGCGTCTCATGCCAAGCCGCGCCAGAATACCATACATATAGTCGT
TGTCTTAGAACAGAGCGGCCACGGTCATCCTCATATGGATTAAATCTCAAAGCACCGATAGTAAGGATGACAGCGTTAGGTCCGGTGGCAAGTGTTTCGAT
CAGGTACTGGATTACCCTCGTAATCTGTTACCATACCAGCACGGTTAGGTGCTTGCCATACATTGTAGGCACGGTTAGCAATAGCAGGATTTGCTGCAACT
TAAACATCAAACACCTAAAATCGGTGGAGCAACCGAACTTACAATACGTTGGACACGCGATCCTAGAGGCATTGTAGACTCAACCGGATACCAGACTGTAG
AGGCGGAAGAAGGGTCAAACGACGATTTGGCTATGACCCTCGTTCACTTTGGTTGGTTGACCGCTCAAAAGCTATTCAAAGAGACGGTTTCAAACGATATT
ACGGGGTGTTCTCATATAAATGATGTAATATCAGGAAAAAGAAAAACTAATCTTGGTTTCGCTTGGAGGTATTTATAAAATGTCACTGATTAGTGAAGAAC
CATCTCATGGCGACTATCAATCGCTTCTTGCATTTTAGGGTCAAAGAAGCGCAGTGCATTACGCCCTGATGACTTAGCTTCGTACATGGCAATATCGGCTT
GTGGACCTTGAAGACCTTCTGGTCCCTGAAATCCACGTGGTCCTTCAGATCCTCTACCTCCTCTTGGTCCTTGTGTTCCTTTTAATTCTTCCATTAATTAC
GCGGCCCTTTTGTGACTGTAACAACCTCAATCATACCTTGCCCCATTGATCTGACGAAATATCGCCGCCTGTCAGTCGTTCGATTCGCTCTGCGACGTGTT
GAAGAAAATAAAGTCGATGTACGAAAAGACGATCGGACGATACGTCCGTTTGAGATACCGGTGCAACAGGGCGTTCCCATGGAAGTACTTCACTCTCACGT
AATGTAGTAAATTCCATGTTCATCTTATCACGACCTGAGAAGTACCAGATAGGTACATCTACATCAGCATCCCAGTATAAACCAAGAACTAGCCCATCTTG
GTGGAGACAATAAACGCGAGGCTTGTGGAAAAATTGCGTCTGATTTCCAGTCTCTCGTGCAAGAACTCGGAGCAATTGGAATTCTGTGTTCTCAGGTGCGG
GGTCGCGATCATCGCTCGATGCGGTGATGTCCAGAAAAGTGAGTTCATCTGCCCCCTGCAGGTCGTATTGACGGGGCAATCTCCACGGGGTCGCCTGCGCG
TAAAGGTACGGTCAAAGGACGCACCCTGGTAAACGGTGAAGTCGTACCGGCCAGGCTCTTGCATTAGGCACTCTCCAAAGCGGTGACACGGGCGGTGAGGT
GACGATGAGTGCCGTATTAGCACCAAGTACATTGACGTGCAGCCTCATCGATACAGCTGCCACGCAATTCGACCCATGCCCACGGCCCAACTCGACCATGT
CATCTGGGTGAGCGTGCCCAACGGTGGTGAACAGCGTCTGTGGCGCGTGCCAGTCATTGTGTCCAACGCAATGACCGCTGGCGACTTCTTGCTGGGCGACT
CTTCGCGCACATATTCCACTTCCTGCTCCACGGCTTGCTGTGACATGGAGTCTGAAACATCCACGAGAAAAACCACCGCAAGGTTGTTTCCGCTTTGGACG
TGTTGTGAGGCAAGCTGTTGCTCTAGTTGATATTTATACGGGTCAAAAGGTACATTTGTCAAGTTATTTGGGTCAACACCATAATCATGTGCCAATTTCAT
CAAGCCGGCCATCGTGATCTTTGAGGAAGTGTTTCGTTGGTCATCCTCATCCGCAGCCCACTGCTTTGGCGGTTATCGCGGGATCATGATGAAGCAACTGG
ATCACATTAACATTATCACATACTTTCACCGCAACTTCTCGTCTTTTCTTTATCGAAGCAGTTGTTACCTTCTTAACTGGTCTCACACTCACATTATCACC
GAATCGATGACAAATTCTCAGTTTGACGATTTCATGCAAGATTCTACAACCATTACAACAAAATCAAATAATAAGCTAATTGATTTCAAACCAGAAAATTC
TAATCGAGATACCGCTCGTCAATTCTCAATGCTTTTTGCATTATTTGCCTTTCGGGCAGTCCTGCTCACATACGCAGACAAAGACACTATTATGCGTCTCG
TGTCAGTTAACTAAAATAATTTGTAGAACTTATGAATCGTTGGATTACTCGATACTGCGTGCAAAAGCAAGATGGGCGTTTTTCAGTGTAAACTTAATTCG
GATATTGTCGTTGATGCCATCGAGGCCGCAGTAGATACTGTGGAGAAAAAATGACCCTGAGACACGCAACAGGGGATAGGAAAGGCACACAGGGGGATAGG
GAACAAAGATGATCCAGAGATGAACAATGAGCAAATGATTAATTTTCTGTCAATGCAAAGAAATCTAAAGTTTTACTTTGGTGATCATAAATCAAAAATAG
AATTGTTTTTTCTGGGGATGTTCATGAAAGAGTTTATATTTATGTGCAACCTGACTTTGCTTCTGCTGCGGGTACCACAAATATGATATTTCAAATTAGAG
AGGGTTTGACTCAGAAACAGTTAGCAAAAAGCTTGGTACGAAACAGTCGGCCATTTCTCGGTTTGAGTCTGGCCGAGGTAATCCGACCGTACTTTTTTTAT
CAAGGAAGACCAGGCCAAGGATATACGGATAGGGCTTGATGCCATGCTAAAGGTACAGACTAGATACGATAAAACGAATAAATGGGGATTATCTGGCAGTG
GCGGAGCAAATTTCGGATCTTCGGCCCTCTTCCTGAATGCCAATACTGTGGTCGATTTCCGCAACAACATCCTGGTAAATAATTCAGTCCCATCCGGTGAT
GGCGCACGATGCACGTTTCTTGCCTAGACAACAGGCTCGTCAGCCAAGACTTCGTTGAGCAGATTAAAAGCACCTATGGCGAAAGCTCGAATGCCTTCCGT
CATGCTTATAAATTTAGTAGAGGAGTCTATGTCTACATTTGTTAGTAATGACATTTTAGTAAACAAGATAGGTAACTTAAAAATAACGAGGATGACTTTGG
CCGGGGTCGAGGTCAACTTCGACGATATTGAAAAGCCTTCAAAATTCTTGACGAAAAAACAACGGGCTCAAGGTCAGCCTCACTGAGCTGAAAAGAAAATT
CAGATGAACTTGATCGAGAACTCGGTGCGGTTGCTGCGCGACCAGGCGCTGACGATGACCAGCCCGGATCAGTTGACCGAGCAGCTCGATGATTTGCTCAG
CAGGCAAAGCTACTCGTGACGATCAACTCGTTCGCAACAATTATGAATTTAGTCTTGAAGAAGAAAGGAGCAATAGCTAATGGCTGAAGAATACGAAAACG
CCTTCAGGTTTTTTTGGATAATAAAGCTACCGCTACGGGTTTTGTGAATCAAAGATGCTTTATCGTTGTAGGAAAACGTATAGCCAAAGATAAAACCGCAT
CACGGTGGCTGTTGCGCGATCGATTACCCCAATCTGCACCCGATCAGTCCACGGCACCCCGGGACTGCCAGAGATGCTGTCCGCCAATCCAATTGGACTAT
GCTATTGTTACTATGGCGTTTGTGCTCAGGATTGTGGTGGCCACCGACACGGCGTTCTTCAATGCGTTCTTTGTCACCTTTAATGGGTCAATCACCCCCAT
CAAGAGTAACATCTAGCACAATGAAGCCAGGCTCTGCATCCGTATCTGCTCGCAAGCCATCAGTTAAGGCAGCAGCACTTAAGGGTGCTGCTAACAAAATG
AAGTCCCCTGGCTCGCCGTCGATGAAGTGCTACGAACGGCCGACTTGGATTCGTACCGACGTCGACGCCATCGCCCTTGTGCGTCGGCTATTTCCCCACCC
TGCATAGGCTGTGTAGCGGGGCAGCTGATCTCTTGGAATGATCTGGCCAAACAACGCTTGAAATGAGGGCCTTAGTAAAGCACGCCCAACACCAAGAAATG
CTCGGGGGGAAGAAGTGTCGCGCCCGTTTGCCGATATCCTGACCGAAATTGCGGAACTGACGGCACAGGGCGTGAAGGAAGTGACGCTACTAGGCCAGAAT
CAGGTGATATCTTGCAGTTAGAACACAATGGTCTGTTTTCTGTTTGTTAGCATAGTTCTATTTAGAAAAGAAGATACTATGGGAGCTTTATTCCATAAATT
TGTCGCAAAAAATCGCCTCTTTTGTAGGAACCATTCAAGTAATAAAATGTAAAATTGACATTATTTCCTCACATCATTTTTATTGTAGGAACGTAATAATG
CGTACCTGCCATGCTTGCCAACGGTGAGTTTGTTATTCCCGCCGACGTGGTATCAAAACTAGGCAACGGCAGCAACGACGCAGGTGCAGACGTATTAGGCG
ATAAAGTCGGCGGCGAGAACTTTGTAACAAATGATATGATAGCAGTTTATGAATATATTGTAAATGGAACAGGTGATGATAATGATTTTGGTAATTTGATT
CCTGGAAAACTGGATCGTGCGCCGCGGCGCCAGCCGCATTATGGGCAACGGTTGGGCGGTGGCTGAATTTGCCTCAAAGCGCTTCTCCCCGCGCCATATCG
GCGCGCAGAATGTGAAGCGGGGCCGGGTGTTCTCCGGCGCCTCCACCATTTCCTCGCAGCTGATCCGCCTGCTCGAGCCGCGGCCGCGCACGGTGCGTTCG
GAACCCGCCTGAATTATCGCGCTCGCATCCTCCATTTGAGACGGAATGCAGGGAATGGTTGCGGTTCCACAAGTGAATACCGGGTTGTCCAGTTGCCGCCT
CCGCGGCAAGGTGAAATTCCAGCCCGAGCGACGGCACCCAGGGCAGCTTGGCAACGGTAAGGATTTCACCCTTCTGAAAACTGAAGAAGCCCGTCAATGCG
CTAGGATATACTAGCTAAAAATATGGATGGCAAGTTAACAATATTTCTAAAGTGGGGCAAACGTCAGCCGCTGGGCTTAGTCGTTTTTAAGCTTGTCGCTG
CACGTGCCGGATTATCTTCGGGCATTACCTTCTCTTTTTTGATTTCGAGCCCACTGGTGGATTTAGGCGCCTTCGTGCTTCTCGCCAGCGTCTTTGGTTTT
AGGCGGAAGAAGGGTCAAACGACGATTTGGCTATGACCCTCGTTCACTTTGGTTGGTTGACCGCTCAAAAGCTATTCAAAGAGACGGTTTCAAACGATATT
CAAAGTAGGAATCTTCGTCCTACGGTGCGCTGCCATTCCGAAACCTGGCTGGCGGGATTGGTGGATATGACTCCGGACGAATTAACGCACCGGGCTGGTGG
TAATCGAGATACCGCTCGTCAATTCTCAATGCTTTTTGCATTATTTGCCTTTCGGGCAGTCCTGCTCACATACGCAGACAAAGACACTATTATGCGTCTCG
GAGTCCCAGGCCAAAAGACGGCGTTCCACCGGAAACAGGTGAACGAGTCTGGGAAATGATGGCGGCTTTCGCCGGTTATGGCTTTCCCAAAGCGCACGCTG
AAAAACAAAGATTTTTGGAACTGAGAAATTTAAATCTGATAGTGGCGTCCTTTACGATGTCACAAGAAAGAATATGAATAGTATGGCTGCATTTGTCATAG
CATATGAAGCGGATTCTTATCTAAATCACTCTCATCAAATTACAGATCCGGGCCATTTGCATCAATATGAAACAAGACTTGGCCCGTCCACTGCGGCTGGT
GGATTATCAAAATATAACGCTCGATTAAATTAAATGTTGGAAAATTCAACGCATCCCGAGCGTTAACATTGATTGTTAAATCATGTTTTAATTGTTTATAT
CGTCGATTGGCGGTGCTTTTATGGCTCCCATTCGGCATGTATAGCAAATCCTGACAGAGGAAATGATGGCTATGATGTGGTGGAATGGATTGCAGCTAAAT
GGCCCAGACAACAATAGCGTAGGAACAATTACCTTTCATTAACATATTGTTGAAACACAGACTTAATACGATCAGGAAGAACTTGTATCTTCGACAGTGTG
ACCCAACAACATGGATTGCGCGGAGGCTCTTGAGATTCTCAAGCCGGTGATTGAATCCGACCGCATCGCCAAGATCGGACAAAACCTCAAGTATGATTATC
CAGAACCGATACTCCTACATCAGGAAGCAGCATTTGCGGTATTGATTTTTACGGTTACGACAGCACCACTTATGTAGTCGGCGGTACAATTAATTTCGTGC
AATCGTTGTGCGCGCGCCGTCTTTGGTTTCACACCAACCAATGGCGGGCACAATCAATGCGCAAACCGTCACAAAGACGGCCAAGTGACTGGCAACTCTTT
AAAAATAACAGCCGATGGAGTTTAAAATCAGCAGAGAATTTCTATCTGAAATAGAACAACTTATAAGTGAAACAAGGCGCAAGAATTACTTTTGCTTCTTG
GAACCCGCCTGAATTATCGCGCTCGCATCCTCCATTTGAGACGGAATGCAGGGAATGGTTGCGGTTCCACAAGTGAATACCGGGTTGTCCAGTTGCCGCCT
TGATAGTTGATGATTGTAGTACCTTTAACAGTAAGACGTTCACCAATTGCAGAGCGATACACCGCAAGCTTTTTGTACTTTGTATTATAGATCCACACTTC
CGTTCGCTTCGTCGAGCGCGACGCGGGCGGGCTGCGTGTATCCGCCGGCGGCGATCGTTACGTCGCCGAAACGGATCTCCGCCGCATTGAGTGTCACCGAT
GGGCCTACAAAAACATGCCTCGACACTTAAGATTTTGTTTCTAAGTGTTTGGTCGAAATTTAAAATCGAGCCCGGCGCACCTCAATCGTGCCAAACCGCTT
CGTATCTTCATGCTCACGGAAAACGCTTGCTCTGATAACGACGAAATCATCCTTTAACTCCAATATCTCGGTGGTGATCTTACCAACCGGGTTTTGCTCGT
CCAAAGTCTGATTGGTACAAATCTGCACCAGCCAAAATTGTTGCTTGACCGCTTGTAGCTACATTGTAACGCTGTGCTGACAAACCAGCAAAACCAGAAAC
CTGATCAATATCTCGCGTACTGAAACCCCCCTCGATGTCGCCACGTTACGTATCAGCGGTGTTAGTCAAAAATAAGCCTCTCCGTTCGACTCAGGAGTGGT
CTCTTAAGAATTTTGCCTCTGCAATAACGGCTTTCTTTTCGGCATCGGTAAGATCATTTTTGCCATTTTCAACCTGCTCCAACACAATATTGGCCCTGTTT
TGAGGATTGCTGAGGGAGTGTCCAGACTGCTGAGGATTGCTGAGGATGAATTTTCTGAATAAGATTTTATGATGCCTTGGGCATGAACGCAAAACCCCCGG
AGTTGAACTGGGTTAAATTCTCAGGTTTTTCATGGGATCAGGACGGGTTTTACTACAACCGCTACGATGCCCCCAAAGCCGGAAATGAACTCTCACAATCC
GCCAACTGCCCTTCAATCTTTTGGACTTTAGCACTCAAATCAGCATACCCTGTTTTTTCCATCATCATCATGAACTTGAAGTAATGTACAGCGTACAAAAC
TCTCGCACAGGTACCAGCCGGTTTCGCTGACCTGGAATTGCCCGGTGTACGAGCCGCCGGACATCAGCGCCGTGATAGATGTGGACGATGACAGGCTGTTG
TGTATTTTAATAGCCTCAAGAAGTCTTAGAACACCAAGTCCACAAACCTCAGCAACTAGCTCTGGCTGCAACCAAGATAGACCAACATGACTTATCGCTCC
CGTCTGCAATGTCTGAGTCAATATCAGGGAAGTCATCTCTATCTGGATTAATAAATCGGAAGAATAGAAGTCCATACTTAATCGGATCAATTTCTGTAATT
TACTGGCGCAACTGATGAGCAGATTGCCTCACTTAATGCGCAGGCTGATGCTTTGCAAAAAGTTGGCGTAGTAACCGCTGGCAACATTACGCAAACTCAAT
ATCACATTAACATTATCACATACTTTCACCGCAACTTCTCGTCTTTTCTTTATCGAAGCAGTTGTTACCTTCTTAACTGGTCTCACACTCACATTATCACC
CAGTTTGTTGTCCAATCTGTTGTCCTAGACGTTGTGGTGTAATACCAATAGTTTCAAACGCTTGTAACTTAAAGTAATTAGCCAATTGAATACGTGACATC
TGTTAAACCTACTGATAGTCTTATAAATGATTACTTTCAAATTTACAAAAAACCCCCGACTATAAACTTGATAATATTACAATATCTGATATAAAAAATTT
TGCCGGAGGCACTGGAGACGAGTCCTTTGCCGGGCCGGGCTCGGTGCTGTTTGTCGCTGCTCTGACGCACGACGGCGCGACAACGACGCTGGCCCCGCAGG
CAGACTGGTGTTGGTATTTCTCTGTATCCCTTTGCACCATATGCAGAAGAAAGTTTGTTCTCCTTCAAGAATGATCACATCATCACATCGTTTGCGCCTTC
CGTACCGATAACCGAATAAACAATCTGCGGTTGCTTGATTACTCAGGTAACGCACACAACACTGAAATACGCAAAACTAACACCTCAGGTGTAAAAGGTGT
TAACCAAAGCTATTGTTGAAATACAAAAGTATTTAAGATTGCTCCCAACTCCATTTTCCTGAAAACTTTTTTTGTATGCCAACGGACCGGACTTGAGGTTT
GTCTGGCAGACTAATAAACGGGGGAAATTGGGTAGTCAATGCGAACTAATGAGAATAACAGTCAAGAAAGTGAGATTTAACAAAGCGGGCAAACCAGTGCT
ACCCAGCTCCTGAGATGGCAAAAGAAAATAAAGCCCGCAAAAGCAATGATGATCGACAAACTTTGCAACTCTTCCCCTGGCTGGTTATTGGAGCCGATAGT
CACTGGAACTGGCCGATGTGTACCTTGGCGACAAGGCACCGCGACAAGGTGCTGCGCGTGTCGTGGAGCCGGTGCGCAACGTGCTGGAGGGTGCCACGTTT
CGGCTCAGGTTCAGGCCAACGGTACGCAATGGGATAGCTGGGCCAAAGGCAGTCAATGCTTACCCTGTGGGAACTCGAAACCTACAAGACTGATGCCGACG
TGGGTGGCTGGGATAGAGATTCGGAATCGTCAGATTCGGTTCCCGTGATTTTCTTTTTCTTCAGGTCCTCGGCAGACTTCTTCGCATCTGGAACCTTTGGT
GAAGATGTTACTATTGATAGATTTAGATTAATGTCTGAGGGAAATACCTATGCGGCAAGTCGCTGGGTGTTCCTATTAGATATTAATATTGAAACGGATGG
TACGGGAATGTGGCGACACAGGCCACCGCTGCGAACCGTCCCACCCTCCAATTCTCCGGCGCACTGCCGTTGGCTCGGTTCGACACCAACGACTTCCTCAG
GGGCGAGACAAGCAATTTTTGTCGCCTTTAAAATACAAATCGCCATTATCTTGGCACAGGCCCGTAATAATTTCTGCCGACGAACGCGAATAATTTTGGCC
AAAGGTGCTACTGGTGATGGCTTCCATTGCTGGCTACGCCTACGTCAGCAATCAAGATTTTGAAGACCAACAGAAGGCTGAGGCCGCATACAGATGAAATC
CTGTTATGCATAGATATTTTTATTTCAAATTTGGGAGCTGTTTGTTTTTTAGTTATTAAGCTTTGTGTCCTTAAAGTATTTAAAACTGTTCTTTCCAGAAT
TGTCAAAGTATGGTAATAGGTAGCTGGAATATTGTGACAATGCAACTAGCATATATGCCACTAAATGCATATGGTTGGTATCAATGGAGGAATGAATTGTG
CGCGGCGATATGGAGACCGCCCGTCTTGCGATAGAGCTCGGCGGCGGCGAACATTTCCCTCGCCCAGGCAGAAAGTTCATCGATACTGAACATTTCTGTGG
GCCAAAAGTTTTTAGGTGATATCTAAACTTGGATCAAAAAAATTTTACTTTTGATGGTAAGAGTAGTTCATTTACAATTGGTTTAAAAAAAAGTTTTTTTT
TGGGCTAGTCAACGTGGATAGTCAGGTAGGAGATGTTGGGTGGCGTACATACAGACGGATCTGTGTGGGTGACACTGGTAATCAAGTATCGACATCATCGT
GGTCCACGTCGTGCCCGAGGTCAGCAGGACAGTCTTAGTCGCCATCCGCCGCTGCCTCCGGCTCGTCCGGCGTAATCGCGGGTTCGTAGAACGAGAACGCG
GGTCCACGTCGTGCCCGAGGTCAGCAGGACAGTCTTAGTCGCCATCCGCCGCTGCCTCCGGCTCGTCCGGCGTAATCGCGGGTTCGTAGAACGAGAACGCG
GGAGGCTGTAGGATTCGAACCTACGGGGCGCTGTTAACGCCCGCTGGTTTTCAAGACCAGTGCATTAGACCACTCTGCCAAACCTCCGTATTTTCGGCTAT
AAACAACTACCTACAGTTCGCAATTCCCTCCTGAGCAAGCTAACGTCTGAGCACCTTCAGTCATGTCTGAGTTCTCGTACACTTGTAAACCTGCCCAGTAG
GATCGCCGCAGGCATGAATGACGTCGTACGCAAGCCCTACCGTTTCAACGAGATCTATGACTGCATGGCACGTCAGCTCAATCTCCACTATACCTATGCTG
ACCACCTGCCCTGCGTGAAGCGCCGCCAGCAACGTTCTGTTGGTATTCCGCAGGTTCCCGCGTTCATTGACCGACACCGCTCTGTGGCGGGCGGGCCCGGT
AATCATTGCAGCCACATTGTACGTACGTGTTGTTAATGACGACGAACAAGATAATAGCATAACCTGTAATCAGCCTTGTAACATAACATTATGAAGGCCCG
CGTCTACTTGTATTTGGGTGGTGAGACGGACTGGGCTGTGCCCAAGTGGTGGTCTGGAAGTTGAAGTAGTTGGATAGAGGACTCGGTGACGTGAGCTAGCA
GTGTTGTACCTGCTGTAGAACCTGTACCTAACACACGGTTAGTAATCCATGATTCGATACCAGCAGTTGAACGTGCAGTAGCAGCACCACCAGCAGAAGAT
AATACCAGATGTACCTGAGTATCCGCTTATACCTGAGTAACCACTAATACCAGATGTACCTGAATAGTCCGCGTAATAACCGACTGTAACCACGTAATACC
TACTGAGCTTTTTTTGTCTTTATCAGGTTGATCACAATATCATCACTACGGGTGCTTTCTCCAATGATCTGTCCGAAATAAATACTGTCATTGGGTCACAA
CACTTTCGTACTTTTCACACTCCAAAGGCATCCTAATCGTGTCGGGTTCATTAAGCACTGGTAGTCTTTTCCTTTCGGCAATATAAGAATACATTTTTTGA
GCGTCAGGATCAACTTTTTATTCCTGTTTTTGTTGTTGGCAACAGGTTCAAACCAAACACCGACAGCATCAACATCAAAATTGACTTTTTGTTTCCATCCA
CTTTCGCGTTCTTACCCATTAGATATTATATCTATTTGACAGATTCTACTTATTTGAATTGTTTTACAAGTCAATTCTTTTATAAGCTGGTCTGTTATTTT
GCAGAAGCACCTGACCGACCTGTCGTCCAACGACGCCGGCGCCGCTTACCGCGCCGTCTGCGCCCTGGCCGGCGATCCGGAGAGCGCGCTGCCGCACCTGG
TATCGAAATATGCGGGAATGTGTATCTCTGAGAATTCATCGTTATTAATACCTTTATGAAATCCGGAAAAATCGATGCTGATATTAAAACTTTTTGTATTC
TACGAAGCACCAGTTAGTAGCATAGATACTTAAAGAAGTCAGTAAGTCCATAATAGGGTCGCAACCTTGGGCAACTATGCTACTATTCATTATGCGTCTCT
CTGCCGCCATCCTTGCCGACGACTCGCTGCGCCTGGCGCACCTTCTGACGTTTGAGTTCTCCACCGTGCTGCGGTTCACCGACTACGGGCACAGCCTTTCA
GGCATTTAAAGCCCTTTTCATAGCCTTGACCATTATCTCCCAAGCCCCCCCACCAATGAGGAGACCTAGGGGGAAGTAAATAACCAGTCAACTGGTTCTTC
GCGTCAAGTTTTAAGTTTATCGCTGCCCATCTCCGACGTGCGGCAAATGAAAGGTATAGCTAAAAAACGCGGATACGATTCCGTTAGTTCTTATGTCAAAT
CCTTTACGCCCAAGCCTAAAAGAAACTGCGCAGGCATACTAAGCACATTAACAAGCATAAGTCATGCAAGCAAACAGAGGCCAAGGCTAAAGTTTAAAGTT
GGTAATAATTGATTACCGGTGCAGCTGCTGCTGGTGCTGCTGGTTGTTCACCACCACCAAACATTTGAGAACCTAACCAAGCTCCCCCTGCCGTTACGATT
GCCGGCGATCCTGTCGCTGGACTAATCATTCTGACTGTCAATTGATTGGCGCTAATAATATTCAATACAGCAACGCTATTGATTGCCTGCGCTGGTATTAA
TAATTTACAAAAAACAATAGACGACAAGATAATAGAAGTAATACAACAATCGGAGATGCAAAATAGAGATATAGAATATATAGAATTAACCAAAAAAGAAG
TGTCGTTTCAGCTTCACCAAGAATTATTCGCCCGAGAGTCGTTTCCTTGTTAAAGAGAATAAATTAAATTTGAATCAATCATTATGAATGGAAACATTGAT
GGTCATGCATAGAGTTTAGGCTGTGATTAAGTTGGAGTTGAAGTGAAGAGTGATTAGCAAGTTTTTCTAGAGCTAGGGTGTTTGAGTCAGAGAGTTGAGAG
GTGCTGCGCTTGTTCTATAACCGCTCTACGAGGGACACAGCAGCCAGCTTCGCCTACCAAATCGTGTCTCTGAAGGCAGAGAAGTACGAGGAAACGGAAAT
TCAGGGTCGGTTGCGAGGAGCACGGCGTCCGCCGTCTTGGCGGCCGCCTTGAGCTTGCCGAGGAGCTTGGCCTTGCCCTCGATCACCTCGTAGGTCTCGGT
CTGCGTCCATATAATCGGGCAATATTTCGGCTGTATCGTCATCCTCCCACACAGCGCCAGCTTCCGGTAAGTAATTACCTTTCTGCTGATCTGCAATGTGT
CAGACTGGTGTTGGTATTTCTCTGTATCCCTTTGCACCATATGCAGAAGAAAGTTTGTTCTCCTTCAAGAATGATCACATCATCACATCGTTTGCGCCTTC
GGGTGATATACTTAACATTTTCACGAAAAAGCGAAAAAGTGTGTCTCTAAATGATTGATTCTAAAATGAAATTTTTAGTAAAAACTACACCTTTTTAGTCA
TGCTAATTCTCCAGCTACTTCTCCTATTACTGGACTAGCCATGCCCCCGACAGCTCCGAACAATCCTCCTGTTAAAGCATCTTTGCCCCATTGTGGATTTT
AGATTCCAATAAAAATCCAGCATGGAGAAAAGAAGAATATTTAAAATCAGTTAGCCGATACCCAGGAGGGAACTCAATAGCATTTCTCATGAATGGAGGGT
GGACATAACGCATGGAGTTGTGATTTACTACCTAGCGAAGATGATAGCACTTATCATTACCAATGCGACATCTCGGGTGTTCCTTTTATTGGGCAGGATGG
GTTCTTGTTTTTGGTATTCTGAAAGGTGTGTTGATCGCCGCAGTCACAACTTTACTGCTGGTTATTAAATCTGTTACAAATCCACATGTTGCATTTCTTGG
CCCATATCTTGGGTATCAAAAATGTCTTTATTTTTTAATTTATTAACAGCTTGCTCAGCACCGATAGTAGCAACCTCTTGCAATCCACCTGTAGTGAACTC
ATCTGGGCTTCGAGGCTCTTGGGCACGGGAGTCTGTGCCCAGAGCACCACCGCCGTCAGGCACGAAGCGCTTCCGCATAGAGTTCTCAGGAACATGGAAGG
ACTTTGGTTTTTATGTGAAGACTTATTGTGTAATATCCACTGATACGCAGGGATTTATCAATTTTATTAAACCTATCTTGGCAACTGCTGCATGATTTATT
ATGACTGCTCCGTGGCAATCGGTTGCGACGTTCCCCGTGATTGTGACATTGCTGCTACCGGAACTTACATAGAGGAAATGTCTCTCAATATTCTTTCCCGT
CATGCCACCCCGTCATGGAAAATCCGAACTAGTGTCGGTGAATTTCCCCGCTTGGTGTGGTCGTTCGTGAGGCCACAGGTTCCCTTCAAGGATTCTGCAAG
GGTCTGGTTTTGTCATGGTTGAATCTCCTTGATTGCTTGGTATACATCCTCAGAATTACGAGAATAAAGGCACTTCTCTGCCGCCTCATCCCTCATGGACTC
CTGCGCGGCCTGCGCCGGCTGCACGGTGGGCGCGAGATCTACGTGCCTGCCGAATGCCGCAGCCAGCGCAATGCCGAGATCCGCGAAGCCTTCGACGGCACG
TGATATACGGGTTGCAGGACGTCGGCATCTGCCATGACATCCAGTCGGGATCGCGGTCTGGGTTTTGCGGGTTGCCCTTGTCGAAGTAGCGCTTGAACGTCG
GAAGAAAGCTGCAGCAATATCTGCTAGAAACAAGAAAAAGTGAGCCATCAGAGCCAACTAGACTTTGTTGCAGGAGTAAAGCAGCAATTTCCAGAATATTTC
ACAAATGAAGAAGTTTATGTTGTTCAGAAGATGACCAGAGCAGCATTTCAAAACAATAACATTGATACTTGTGCTCGTGTTTGCCACAGTCCAACTGGTTAG
CTTTATTACAAGACACCAACACCAATACAATTAAGTTATTGGCCTCTAATGCGGCAACGACCAATGGTCTCTACTATTAACTTTGGAACAACTGGTTTTAAC
CCTTTATATATTCAGGATGGGAATAAGCATAGGATTCTTTAGCAGATTCCGTTTTAGCACTACATTCAATCATTAATAATGCTTTTTTGCTTTTTCTAAATT
GCCATTCCCCTATCCGAGCCACACTCCTGCCGCGGGCAGTTGATTGACTCGCCGGGGCACCTGCCGTACGCTGGTCGCACGCCCCGGAGCCGTGCGGTGTTT
CTGTGCCCGTGCATACCCTGCAGCATTACGTGCGCGCACGCGGCCGCTGGTGGCCTGCTGGGCCTATGCCGCGGCCCGGTCGCGGGTCCCTCCTTCCGGGTC
ACAAGCGTGATCCTGAACAGGGAACGTTTGCAAACCGTCCGTCGGCGGGTGGCGGGTTCAATACGGACACGTTTTTCGTGGCCTGGCAGCACTTCCAGAATT
GCCAGACTGCTGGTTGAAATGCTCGACAACATCACGGACGGTTCAATTCAACTCACCTTTCCGGATGGGTCACAACGACTTTGTGGACAGGGCCATGTCGTT
GAGCTGGAAACTGGCTCGGTTTCGACGACTTTATTAGGGTATCAGTCAGCTTGTTGACCAACTGCCGCCCGATCTGGCGCACAGGCTCGGGCGCCGCATTCA
TCAATGGACGACCGCTGGAACATTTGCGACGGTCGCTGGAGACCAAAGCACGGTTGCCACAGGGTTCACCGATGGTGCGACCAAGTGGGTCCGTGGGACATT
CATTCTCACTATTATCAGATACATATTTAGGATTTCCATCTTCATATTTAGTTGTACCAAATATAGATGTTTCCATTGCTTTTTTATTCTTCTCTACTCTAT
TGGAGAGTTGTGCCGTGCCGGTGCCGGAAGAACTGGCATCCGAGATTTCTGGCCTTGATGGCGGAAGAACCGGGGAAAGCGGCCCACGCCCAGGCCTCCGCC
CATTTGATCTGGAACTCTGCGAGGTGTTTTGCGTCCATGAGTTCTTTTGTTGTGATGACTTTTCTGACTGAGCCGAAGAGTCCTTCCAAAACAAGACGATGT
ACCATCCGCCACCCACGGCCTTGATCAACTTGAAATTCACAGAACTCGTGCCGCGAAACTTATCGGTGCAGTTCAGGGGTAGCGTATTGCCAGAGTTCGATT
GGAGATTTTATGAACATACATTACTTCAATCACGCACTTTTTCCAGGAACAGCTGCAAACAAAGTTGCGAGAATAAATATGGCCAATGCCTTTGCTGAGAAT
GGCGGCATCCTGGCCCTCCTGGCGAAGCTCAAGCCGAAGGGCGGCGAGACGCAGACGCGCAAGCTCGGCATCTACGTGATGCTCGGTCTCTTCGGCGCGGCG
TATCGCCTTCCTGTACCCCTGCAAAAGCTCGGTAACTATCTAATTGACCTCGATCATTGTCTCCATCCCACATTCTTGGGAACAAATGAGCAGATGGAGCAG
TGGTATCGTCTTCTGCATTTTCAACTGCCTTTCGAATTGCAGTATCACCTCCAGCTATAATTCCGATTATTACATTGTCAGACACACCAAAAGTAGGAGGGC
TGTTGCGTAAGTTCAAGCAGGGCGCAGCACTCGGTTTCGGCGATGAGGCGTCGGCAGCCCTAAAAGCTACCTTTGGTGGTCGTGGGGCAGATGGCGGCACAT
GCTGTGCAGCCGTTTGACTCATTCACTGGCTCGATCACAGAAGGCGGCTCCCCAATCGTCGTGGTCACCTCCATTGAAATGACACTGGAGAACGGCCTGGGA
CGGCCGCGTCCATGGCAATGGCTGGGTGTCGATTGATCTCGACGGCGGAGCCACCGTGTACGCCGTGCGTCAAGGCCAGGCGTGGCAGCTCCGCGCCGCCCG
GTGAGGAATCAGGATACCGACGTCCTCCACCGTCATATGATTGCGTTCCAGTAAATCGCGGCAGACTTCGTATATCTTGCGCGACGCGTACTTGAACACCTG
AAAATCTCAGACAGACCAAGTCTTTAACAAGTCCTATTGGCTATTTTAATGATATCAGCAGTGAAAAAAGAATAGATTTTGTTCACAGGGAGAATCTTTTTG
CATTCATGTCAGTCACTACGATGTAATTACTCTTGTGGCTCGGCACGATTGTGTGCTTGCGTTGTTGCGCTTGCTGCTCACCGCATGGTAGGCACGTGCTGT
GTCGTGTCCAACAACTGCCCAACATCGCTCGTTACCCTGACCGGGGTGGAAACCCTCACAAACAAGTCGATAACAAACCCGAAGATCACAAACATTCTTGAC
CCAGCGCGCAAATATTACGAGAAACCGCCTGCGGCGGAATTGCAGTTGGAGCAAATCGCCGCGCTGGTCCGGTGTCCGTTCTGGTGCCTGCACCTGGAACCT
GCTGAGCGGCGTGCCGATCGCGTCTTGCGATTGCGTCATCGTTCCCATCGATTGCGCTTGCGACTGCGCGAACGCCGCAAGATCGACCGAGGGGCGCGCCGT
GCTGCAAGTCTGAAACGGTGGAACTGCAAATGAACGAACAAATGTTTGTGCTTTTGTGGAACACTGGCCTAACGCTGTTTATCGGCATCGTTAGCTGGGCTG
CAGTTCCGGCGGCATATTTTCCGCGCCGCCCGCAATCGCCGCCGCTGCCACCCCAAACGACTGCGCTACAATCACGGACGGCTCACCATTGCACAGCACCAG
TACGACATTTAGCCAAACGACACTTAGCCAAATAGTACACCAGTGCCCGACAGTTAGCCAAAAGACAACTTACCAAATAGTACATAACGGTGACATTTAGCC
GAGAGCCTTGCTAATTTTCAAACTAGCGAGATAGCTAAATGGGCTAGAGTGGTCCGCGATTCTGGCGCCACCATAGATTAATGGATTACAAGAGAAAAAATG
AAATCAATTGATAAAATATCAATGAATATAATATAGATTTAATCTGTTTTTTAAGTTTTGATTTTTGTCTTCGATAATTTGTGTAAAATGTTCTGGTTTTTG
CTTCGACCCCTCGGCCGGCGCCTTCACCCCGGCCACCGACGTGCCCGCCGACATCGACGCCGACCTGTCGGCCGACTGGCTGCCCGCCGGCCTCATGCTCGG
CTTCGTGTCTGGGTCCAGTGTGTATGCGGGAACCGGTGGCGGTTTGAGCATTTCCACTAATGGCGGGTCTTCGTTCACAAACAAGACCACGACTAACGGACT
GTTCTATTAAAAGCTGACTCCCCATATTATTCCAATAGGTATTTAAGTAATTTGCGATAGTCGAATTGCTTGATAATATTCTTGAGATTTCTTCGTTTGCTT
CGTTTTTTGTTCTATTTTACTCATAGATTCAGGTCCAACAAATCTCAGATCCTAAATTACAGAGCTCTGGGCTTCATGTCATTACTCAAAGGTTTAGCAAGT
AGCCGTTCGCGGACAGGCCGGGGATTGGATGCCCGCGATGCGCGCGTTTCCTCGATGAACTGGTGGCACCATTCCAGTTCTTCGGTAACTGAGAAATGTTTA
TGTATTCTATCTGGTTTGTTACTGGTTGTCAACTACTATTTTGCGATTTTCTCCCCTGTAGAAAGTTCAAAATCTCCTAAAAGATAACTTCCTCACTACTCC
GAAGTGGGTATTGAAGAAATGTATGGTAAAGATGAAACCTACCGCCAGCAGCGCTTCGTCCGAGTGAATGATGGTTGCGACATTAAAAAACCAACCGGGCAG
CGTCTAACGGTTTTTATTTAGAACAAAGTGGTGAAGATAAACAAGTTGGCATCAGTTTAACGGATGGTTTAGATATTAAATTTGATTTAACAACTGCTAAAT
AGCAGCAAGTCATGGTCACCGGGGCGGGGTAACAGCAATGTCACTGCTGCTAGGGGCATGATGCCGATGCCGATGCCTACGCACGCTCCATCGGCCTTACCA
CACTTTATCAGTCATCGCGCACTTCACTCGATCCCGCTTGATACGTTCAAACATTTTCTTTTCTTCATCCAGCGCACGGTCTAACCCTTCACTAATCTCATC
TCCCATCAGATTTTGGTTTAACCCCAAAAACTGACGATTCCCATGTTCATGAGCGTCTACCTCACTCTCAAGTGGTCCCACGAGCATATGGGACTTGAAAAT
AATGCCATTTATAATGCCTTTACTCACACAAATACTAAATCATAATACCCATTTACTAATAGTAATCATATACCTTTCTATACTTTAAATTTCATGGAAAAC
TGTTTGTTTCGTATTGATGTATGTTTGTTCATGGTTGTGTGGATATCTTTGTTCATGATCGTCTCTTTGACTTTTTCTTTCGTTATAATTTCTATAATATTT
GGTTCTTTAATACCTGTGGATGATTACACATCCATTCCCATTCTTCTAAAAATGATATAGTGTTTTGACCAGCTACAAAGTAACCACTTTGTCTATACTTAT
CGTTCTGAACCTACTTAAAAAAATGAACGTGGAGGTGGTTTGCACAACTGATGATCCAATTGATTCGCTTGTACATCATAAGAAAATCGGCTCGTTTAAGTT
AACGTTGTCGCTACGGTTTCGCGGAGTCGGTAGTAGCTGTGGTTTGGTGTGGTGTCGATGTACCAGTACTTCCACTCACGGTCTGTGAGGGTGACTGGATCG
CTTCGGATTCTTCATTTGTTTCTTCTTTTTTCTTAGGTGTAGATTTCTTTTTAGGAGACGAAGATTTTTTAGGTACTCCACCAAATACAGATGAACTACTAG
TGCGGTCGGCCCGGGCGTCCGGAGCGACGACCGCGATGTGAAACAGCAACGGATGGGCGTTCGCGTAATCCGGATACGCCGCCTTCGGGTTGGAATAGAGCT
CCCTCCTCGGTCTCCATCGCGGCCATCGCCATCTCCCCGGTCATGGTGCGGCGATCCTCCAACTGGGCGAAGTACCGGTCGAGCTCGTCGATCTCGTCCACC
CCCGCAGTGGCTACCAGAGCCAGGTTTCGACGCTGCAGCTTAGCCCCGGAGCCCGCACGACCCTCGACGTGACGCTGAGTCCGGCGGTGGCCACCGACTCCG
GGTCGTTGAACTCCGCATCGGTCATCTTGTAGTTTCTCCACAAGGCATTGTTCCTTTGCTTTTCCTGAACTTCAGGATTAGCGCGGTACTCGACCGAATAAG
CCAGAAGCCCAGGTTAGCTGCCCCGATGTCCATGGAATTTTATATGCTGTTCCTGGATTCTTGCTGTAGATTTGACACGAGGATGTATTAAGACAGGCATTG
TCTCGTATTGCGCAAAGATGGGTTTCGTTCGCGACTCGAAGGCTGAAACGGCAGTCGGCGGCGAAAAGGAACCAGCCGCCCTTAGGCTCTTGGCGCGACTCG
CGAGCAATCTTTTCACTTTGTAGCCTTTCTATTTCTTTAATTAAGTCGCGGATCATTACTTCAATGTTGGTATCTGGCGCATATTCGCGGATGTCGTCAGCC
GTTCTAATTTGAATTTGTAGGTTTGTCTTGTTCTGTTAAATATAAGTTTTTACAAACTTACAACAGTGTCAACACAATCTTCATTAAAGTGATATTCATTAG
AATCATTTTATATTCAGGCACAAGCAGGACAGCAAATATAACATTTAATATAATAGCCACTGCCATGCCAACAGGTGCCAAGTTGGTTTTTCCCGCTTCCAC
TAAACTGTGGTGCTTCTGTACCTGCTACACAAAAAGGTAAGAAATAATATGCCATCCAAATCAGATAACTTCTTTACTCGTATTAAAGAGAATGTAATGGGT
GGTAATGGTGATTATATGGGTGTTGCAGGTTGGTTAAATGATAACGCCGATGTAACAGCTCCTGTTTATTCATATTGGCCAAATGATTATGGTTTATATCAC
GGTGGCCTTTGGCTCACCGATTGTTTCACGTGGAACAATCTTGGCTCGTTTTTGGCTCACTTTTGGTTTTTTCATCGACTTATTGGGTTGGATTGCCACGTT
GAAATGGGACTATAACTAAATAGGGTATAATAAAGGAGTAGACAATGGCCCAGTTTCGCATAGACACCCACCAATACCTACCACAAGAGAAAACTCTCTTTG
TTTCCTTTTCCGTTTGCTCGAATATCTGGTTCGCCCACAGACGTTGGGCTGGCTGCACGTTGGTCTATGGCTCGGTGCGGTGGGATGCTTTTTTATCTTGGT
GAGGCGGTGGTGGCGGTAAGCGCACAACTCCTGGTACGGGTGGCACAGGGGGCGCAGGAGGAGGCGGCAATGGCGGTGCAGATGCTAATGGCTCTGCGGGCT
AAACTCAGTGAGCTGACTTTTGAGTCCACGAAGAGTCAAATCTTGTTGCAGAAATTTGCGGCACTCCTGACCCTGTGCAATATCCTCTACTGTGAGCACAGC
TGGTCTTACTCATATCGGGAATAGTTTTTGCAATTGAGTTTAAAGTTGGTGCATCATCCTTTGACCGCGCTGCCGTCGATCAGGTTCATGACTATGCCTTAG
CGTTTCCGCAGTCTGCGAGCAATGTCATACGGCAGGTCCGAATGCGGACACGTCCACCGCTGCCGTTGCGGCGGCGGAATTGGCCGGTTGGAAGGTCACCAT
CCGGCGATCGTGGATGTAGCGACTGGAAGGCTGCTGTTGTTTGCTACGTGGTTCGACCGCAGTGAGCCGCTGCGACCGTTGTTTGATCCGGTCACGCAGGGC
AATGTAGATCTATTCAGATATTTTGGTTTATAAAACAAAGACAATAAAAATAGAAAAGAATTTAATGATTTTTAGTAAAAACATAAAACCAATTATTTAAGT
CATGCCTGCGCCTGCGGCGGCAGAGCCAAGCCACGAACCGAGTAACGGAACGAGGAACGGGAGGAACGCCTCCGGTTGCCCGGTGACGGGATTGATGGTGAG
TGGTATCGTCTTCTGCATTTTCAACTGCCTTTCGAATTGCAGTATCACCTCCAGCTATAATTCCGATTATTACATTGTCAGACACACCAAAAGTAGGAGGGC
ATATCTTCTAAAGGATATCCCGATTCATACATATTTAATACTTCATTAGGGTCTGTATTATTTCTTGTGTGTCTATGAATATAGCAATAATTAGCTCTCACG
GTCCGGCGGCACCATCAGCACCATCATCGAGAAGATAATGATTCTTTTGATTACCAGTGTATGCCTTGTACCATGGAGATAAAAGTTGTGATGGTACAAATT
GATGCCGCAAAAACGACCCTGCCCTGTTTCTGTACTTTTCTGATTTCACTTTATCTTTACCAGTAAAATACGAAAATAACACTCCAGCCACACCCGTATTTG
GTTTACGTGACATTGACTGGGTCAAACTATAAGTATATCGAGTGCGATATTGACCCTTCGGCTACAGACGTGAAAGTATTCTCCGGTTTCAGAGTGCTGGTC
TCAACTACCATAAACCACAGACCACAACTACACTTCTTATCTATTTTTTAACATTGTAGTATTTCCCTTTTTGCTCTTTCGGTGAACGACCTACGCCTACCC
CCGACCCGGGCGCGACTAATGCGGTTCGTAACTTCCGCTTGCCCGGATCAATTAACCTCAAACCTGGGCGCGATAACTTTGCGTCTGTGTTGCGTGAATTCC
CTGACCGCAAAAAAGCCGCACCCATGCCAGAACACATTAGGGCAAAACTTGCGGAATTACGCAAATGACACACCATCAAGCAATGAAATTATTAGACAAGGT
GACGTCTTAAATGTTCGCTCATAACAAAAGTGTGTTCATAGATTGCACCAGCACCATTTTTCCTATTTGGATGTCCTGGTTTAAATAATAATCTATATCCAT
GACGTCTTAAATGTTCGCTCATAACAAAAGTGTGTTCATAGATTGCACCAGCACCATTTTTCCTATTTGGATGTCCTGGTTTAAATAATAATCTATATCCAT
TTTATCGGATAGCTGCTAAAAGAAGCACAAATAAGTCCAAAAATATCAAAAATAGTAAGTTAAAAAATCATACATCGCCATCATAACTGTCTATCGCAACTA
CATGTCTATACCGTAAACCGCTTCAGCCGTGGACTCCAGCAACAAACGGTTTTGTTCTTCACTATCGCGTAACGCCTGTTCAATCTGCTTTCTTTCGGTGAT
CGTTCAATTTCGTCCATTGCTTGCCATCGCGCTTCCGTCAAATCGCTCACGATTGTCTCAATGTCACTCATCACTCTCTCCCAATGCGGCTTTGTCGCGGCT
CCAAATAAATGGCATTCTTGTCTTTAGGATATATAGTTGTAGTATTATAAATCGTTTTGTAAGCAATTTCTGCTTTAAATTCTCTATTTAGAATTTTGTTCT
GGCATACGCTAATCTGGCAACCCGTGTGGCATCTGTGGTGTTCTCATTCGCGGTTGATATGGACATTGTGCCGTTTAACCCCGTGACGGGGCTTAAAAAACT
AAATGGACCGATGCCGCCACCGCCGACGAAGTCGTGAAACGGGACCTCAAGGTCACCGTCAGCGACGACGAGGTGAAGAAGTACTACGCCGACAACACTGCG
CTGTTATGCATAGATATTTTTATTTCAAATTTGGGAGCTGTTTGTTTTTTAGTTATTAAGCTTTGTGTCCTTAAAGTATTTAAAAACTGTTCTTTCCAGAAT
GGCACAAAACCATTCATGCCTTCGAAATATCCTTTATTTACCCAATTAAAAACTCAACAGCATCTGATTTTAATAGTTCATCGACCATATCTTCTTGGCATT
GGTATTGGCAAACATGTCAAGGCGAGAGTCTTCACCCATAGCCTCATGCATCTCTTCACCATTAAGAAGATGAATATCAAACTTATTAAAACTCATCATACG
CGTTCTAGCTATGTTGATCTAGATAGTGAGGAGGAAAAAAGCTTTGTAGTAGATAAGCCTAGAATAATAGCTCCGGTACTGCGAGAGGAACTAACCAAATCA
GGTCGATGAGATTGGCCGTGGTTTCCTCGCCCGACACGATCAGACCAAGGCTTCCGGCATTCTTTGAATTCAGCGCCGTGAAGTCAGCGGCCACCCAATCGG
TCTTAATAAAGTCCCTAGAGTAAGCAAACTATAAATAGAGTCAAGGCAACGAAAATGATAAGAATCATATTTACATTATTCGACATTTTAATTCTCTTTAAT
GGAACTCACTATAAATGTATGCTCAGGATCATTAATACACACAAGACAGAAAAATACACCAAAAGTCAACAAAATAGAAAAATCAAAAAAACAAAAAGGATG
CTGGAAATGTTTGATCGTGAGAATGCCTATCTAAGTGGATGGCCAACCGAGAAAAAGTTGGAGTTTATTTTCGATAGCCTTAAACATAGATCAGACCAGATT
AATGGCGTTTGGGTGCTGCAGCCTAGAGTTTTGCAGTTTAGCCAGGATCAATTGACCGAACGGGCTGCGAATGCTGCCAGCGCTGTTCGCTATGAGCGGTCG
AATGGCGTTTGGGTGCTGCAGCCTAGAGTTTTGCAGTTTAGCCAGGATCAATTGACCGAACGGGCTGCGAATGCTGCCAGCGCTGTTCGCTATGAGCGGTCG
CTATCCATGTAGAAGCGAGCTATCACGCCAGTGTTTCAGCTACGGTGAATCTGCCGCAAGGTAAGACTTGGGAAGATGTCGCCAACTGGTACGTCAAGTGGG
TAATGATAATGCTAATGGTTCTCCAAACGAAAATGCTCCTGGTGCTCATCGTTTACCAATTAATTCTTACTTTCACTAAACTTGCAATTGACGCTGAGACTT
TGAATCATACAATTGTGTAGAAGGTTCATGTGTAAATCCCGGAGATGGAACAGGTACTTATGAAACATTATTAGAATGTGAAGCTATTTGTTCTTCAGGAAC
CCAAGGGTCGCCGTCGCTCCAAGCACAAGAGCAGACTCAGGCAAATAGGGAAGTAGCTTGTCAAATGTTCGCTTATGACACTCATCAAAGATGAACAAATCC
GATCTGAAAAATAAAAAACAGGCGGCTATTGTAGTTCGTCCCAAAGCGGGCCTTGCCAGTCCTCATGTTGCGGCCCATCACGGACGAAAATTGCTCCGGTTT
CCTTCTTCCTGATGATCTACATGGTGCCGCAGCTCAAGCAATTCGTTAAGAACATGGGCCAGGCGCTGCCGCCGCAAACGCAACTACTCTTCTTCATCTCCG
GATGCCGCAAAAACGACCCTGCCCTGTTTCTGTACTTTTCTGATTTCACTTTATCTTTACCAGTAAAATACGAAAATAACACTCCAGCCACACCCGTATTTG
GCCGCGGTTTTTTAAGGAAGAAGTGCGTGAAACTTATATGAAGAGTATAAAATCTCAAGGCTTTGAAAAAGCTTTTTGACTACGCAGTTAATCGAACATCGG
CCTCCCTTATCGGGTTTGCAGTGCCACAAACGGCGACTGCGTATTGCTGCCCTTGAACGGCGTGAGAGCCGACTTCCAGAGCGGCTGACCGTCGATGCGAGT
GTAATGTCAAAGATTTTGTGCCAGCGGCAACTTGCAGACGATTTTCCAGAGCTAACTGTTCGGTGAGGTTTCGGCTGATTAGTGTGCCTACATCAACAGGCG
ATAATGGAAGTTCCCGTATATAGATACTATTCGAATGATTTGCGACAATGGGTGGCCCAATTGAGAATTCCGTTCCCAAGTGGAACAACCGCTGACATGGCG
TGGTAATCAAGCAACTCATCATCAGATAGCTGACGCATGGCTTGTGAGATAGCTCGCATGGTTCGCACGTCTTGTAAGGCGTAGTTACCCATTTCTGCCAAC
AATGTTCACGGTGAACGATGTCGTGACGGGTGGGGCTGGAACCCACACACCGTCAACGTAAGAACCGCCTGCAGTGGTGGTACGGGTGGCCGGTACGGATTG
GGGGTAGCGACGGTCAAGCGGACGGAACACACCAAGGTCTTCAGACATGTCTTCACCAGGTGCACCGGTCACGTTCACATCAAGGTCGTTGAGCGCAGGGTT
TGCTCCAGTTGTACCTTGTGCTCCAGTTGCCCCTTGTGAACCAGTTGCTCCTGTTGCTCCTTGTGAACCTGTTGTTCCTTCGTGGCCCTGTTGGCGTACCCT
CTGACATGCTGTGCTTTTACGGCAGTTGAACAGCCTTGCCAGGACTTCATTTGTTCTTTGTATGATACACTTTCTCAGGTATGCAATACTTCATACCCCACT
ATGATGACGCCGCGAAGTTACCGGCTGCATCGGTGAGCGCATCGCCGCGCGGCGAAGCGCATTCCGAAAAATTCGAACTGGTCGTGGTGGCGCAGGCGGGCG
AAGATGAGGACGAGCTGGACGATGAGGAGGAACTGCTGCTGCTAGACGAGGAGGACGAGCTTGATGATGACGACGAGCTGGATGATGACGAGCTGGACGATG
ACCACCTACAAGATAATACATACTTTTACGTATTCCTACATATTTGTTTAGTCTATCAAATCCCATTGGAATGCCTCCATTTTTATTTTGCATTCCTTTTTC
TATTGCTATTTCTTCTTGTTGAAGTTTTTTTAATTCTTCTTTAAGAAATTCTTTTTGTAACCCTAGTTCTTGAATTCTCATTTCAATTATTCCAAATTGTTC
CATGCGGGGTACTCCTGCACGCATGTCAGACAAAGCGTGAGATAAAACCTGTTTGAGCCCCACCGTCAGGCCCATGAGCAGCCGCCTGCAGCAATGCACCCT
GGCAGGATTTAAACCAAAGGCATTTGAAATAACTCAAAAAAAAATAGCTTTTCGAATTACTCCACAGAGAATACAAAGTTACACATAACAACATCAGTTTTA
AGGATCTTGTACTGTAGCAACTTCAACAAGTTTGCTATCCAAGTAACACCAATCATCAAGGAAGTCAAGATCTTGAACAGATCCGCCATCTTGTAATATTTT
AGCTGGGCCCGAAGTAACTAAACTACCGAGTTGCTTGCACATTTATGTGGTCCTGAGAAACTCATGCCAGATCCACGCGGCGCCCGCAGATTACTACCGTTT
CACGCGGCGGTTAGAACTGCAGCAGCGAACGTTCGCGGTCCAGCAGTTGCAGCGCTGCGGTCTGCGCGGCCTTCTCGCGCAGCGCGCTGGTGCGGTCATCGG
AGGCTCATGGCCGCCTTGATCGCCGAGAGCCCGCCGAAACGCACCAGCACCGCGATCATGTCGTTGGCGGTTCCCTGCAGGCGGCGGGCGGTGGCCCAGTCG
GGCCGTGACCGGGCCGAGCTTGATCGGGGTAAAGAGGATGTCGTAGCGGGGATCGCGGGGCATGGCCATGGGGATGGTCAGGACCGGCCGAGGCGCGCGCGC
TGTTCTGAACACGTGGTCTATTGTGTCAGAACTACGTGCAGATGAAGGGTTATCTAAAATTGCGTTTTTTCTTACAGGGTCATATTTTACATTCCATGCATT
TGAAGTCGCTTACGGCGGATCTGGTTATCAGATTGGCGAGACGCTTACCGCAACAATCGGATACGTCAGGCAGCGGGTTCTCTGTTCCGGCAACGTCAGTAG
ACCATCAAGGGAGATAGAAGTGGATTGATTTGTATGAGATTGGCTCCGTCGACCCAATTCTGCAGGAATATGGCGCATGGAAAGTGTGGCGGACTTTACGGA
AGTGGACGGGTTCGCAACACGCCAAGAGCATGCTTGACCATTGGGACAAGCATCGCGCCAAGTTCATCAAGGTGATGCCGCACGAATACCGTCGCGCCCTGG
CATGGAAGAAGCTTCGCAAAGAGCTGCCAACCTGGATTGTATTGAGTGCACTGAACGTAAAGCAAAGCAGCTCGCAAAACCAATTGGGCGGCAAAAACACAT
ACCGAGAAGTACAAGGTTACCGTTGACATGGGCTTTGTAAACGGCATCAGCGCATAAATCAATATTTTAAATTAGGCACGGAAAATTACCGTGCCATTTTTT
ATATATATATTTTACAAAAATAAAGAATTAATTCCTAAACTATATATATCAACCTTTTAATCATATATTTAATCTTTTTTATTTTGTTTTGGAATTTATTTT
GGAACGAAATTTCAAAAAATGATTCAGAAAATTTCGCATGGTTAACGGCGCGGGAACACTATATTTGCCATAAATTGCTGTACAAGACGTTAAAAACCCGAC
GAACTAAAAAAAAAAAAAAATAAACATATTACCCCCTCCCTCCCCTCCAATTTTTTTAAAAGTACTTAAAAAAAAATTAAATATCGTCATCAATTTGGAAAT
GGGGTAGCGACGGTCAAGCGGACGGAACACACCAAGGTCTTCAGACATGTCTTCACCAGGTGCACCGGTCACGTTCACATCAAGGTCGTTGAGCGCAGGGTT
CCCGCGGGTCGAAATGCTCAAGCATCTCGTAATTGGTGATGTTCACGCCGAGCGCACATTCGGACTGCTCGCGCGCAACTTTAACTGGGATTCCGAATTTAT
GTTGTCCAGCAGATCGCAAAAGCGTTCACCCGGATACAGGGTCATGAAATGGGCGTAATCCAGCTCCCCCCAACCCCAGCCCAGCCAGGGCCTTTGGGCAAT
GGAGCGCAACTGGGACACCCGCCATGCCTGGCTGCGCGACTGCGCCCATGCTCTGGAGGTCATGCTCGATCACGGCCACGACCGCGAGGCCCTGCAGCTGCG
TGGCCAAAAATAAGCGTAGCATGAGTAAAAAATAACAAGTATTGGCTACGATATTTATGTTGAAAACGGTTTAGCTGCTTTAGATCAGTTCATTCAAAAAAT
GGTGTTGCTACTGGTGCTTCACTTCCAATAATAACAGATGGTGCTTATTTCCAGATAAGTGGGAACGAGTTTTGTGTTGTTACTTTAAAGATGGAATAGAAC
TCTCGATCCGGTCGGTGTTGTGACTGATAAGCCGGTTACTCGCCTCCACGATCGACGGGACGGAGCGGTAGTTTGATTCAATCCGGAACACGTCGTAAAGGT
ATTAAGTTCAAATCCTACAAATTTTCTACCATAACGTAATGCAGTTCTAGCAGTAGTTAAGCCCCCACCGAAGCAATCCATTATAATATCATTTCTATTGCT
ATTAGTGACGCGCTCGCTGACGGGAACTGGAACGTCCCTTGGCGGGAGCCTGCGCTGAATGGTGCGCTGGAGGTTGCGGAAGTTGCGGCGGGTCAGTTCCCC
AAAGCACTTCGACCATGGTGAATCCGCGTTTTTCGATTTGATAGGTAAAGGCTTTGCGAATGGCGTTTTTGGCATTCCGGACTTGCCGGGGATTGAAGACCG
GGGGAGCCCAACATTGTGTCTAGCGGATCTGGTAGGACTCGAACCTACTATCTTCTGCTTAACAGGCAGTAGCTTATACCACTTAAGCTTCAGATCCTTATT
GTCGGGCAGCAGGCGACGACGGCCGCCGCTGGCGAGATCACGTGGTTCGACATCGACGCGGCGCTGCCTTACCAATACTTCCGCATCACGGCTGCGAGCCCG
AAAATCTCAGACAGACCAAGTCTTTAACAAGTCCTATTGGCTATTTTAATGATATCAGCAGTGAAAAAAGAATAGATTTTGTTCACAGGGAGAATCTTTTTG
GATTGATATGCCATATTTATTTGTCGCCATTATTATTGCAAGTTTTGCTTCCGGTTATGGATTTGCTTATAAAGTATCACGATTAGAAATTACTGAAATGGC
TTGTCCGCCCGATTGCAGGAACAAGGCCTCGTGGCAGCAATCCAGAGCAAGATGCAGCTTTAGCTAAAGAACTTTTGGCAGATCCAAAAGAAATTGCTGAAC
GTCTGAAAACTACCACCACCAGTAGTTGCATATGCTCCTAATGATGACGAATTTCCAACTGCTGATGCACCACCTGCTCCGATTGTTACTGAATATGATGAT
GGAATTCAAGTCCCTGAAGAAGGGTCGAGTCACCAATATCCAGTATTCCCAGAAGAACGGCTTCTCGGACGGCACTTTCATCTTCCCCAATGGCAGCCAGTG
TTCTGCGCGTTTATTTAGCCAAGTTACCGGATTCTTCGACTTCCACCCGAAGTTAACCCCACGAACCTTATAACGCTGCTCATTAAGCCGGTCTAACACGCC
TTATCATATTCTGAGCGTAAAGAAATATCACAGAAAGTACTTAATGAAATGATTACCGAAGCCAATAAAGATGAAAATATAAAAATATCACAATCTAGCGAG
GGCGGTGGCGGCTACCTCATCTCCGGCCTCTACGACGTGAAGCCGTCGGTGTTCGGGCGGTCGGCCGGAGCGCTCGTCACGACCTCAAACAAGTACGGCAAG
GTGGACCCACCGCCAGCAAGCTTCCACCCGGCAATGCCGCGTTGCAATTCGCGACAATTTCCCGTACCGGTTCGACCGTTACGCTGAATTGGACCGGGCCCG
GAAGCCGCCCTCAACCACCTCGCCTGTCAGCCTGTTGTAAACCACCTCGCCATGAGCGCGGACAAGGTCAAGCAAGTGAAGCAGCCCGGCAATTCTGGCTCT
CAAGCCCGAAAGACTCGCGAACGAACGACTCCGCCAGCGCCGGCGGGACACGCTTGGTCCGAGGCGCCTCCGCGCGGACCGCCGCCGCGACCGCCTGCTCCT
GAACTGGTACTGACCGTAAAGCTGCTTGACGTCGCCCGAAAATTCGACCGATACGTCTTGCAACGCACCAATACGAAGCGGGTTACCGCCACCTGTCGGGAT
AAAAATAACAGCCGATGGAGTTTAAAATCAGCAGAGAATTTCTATCTGAAATAGAACAACTTATAAGTGAAAACAAGGCGCAAGAATTACTTTTGCTTCTTG
TCTGTTTCTAATCTCGGCAGAGTACGTAGAAATCCATATCAAACTACCATCAAAGGTAATGTAACGCGCCTTGGAGAGAAGATATTTAAATGCAGTCCTGAC
CGATAACATGCGTTATATGCCATCCATCTTTCTTCAACGATATCTATGTCTTTTTCAAAATAATAATCATAAAACATATTATCTATTTCTTTTTTTCTTGCT
GAATAACTGAAGCAATGGATGTTCAAATTTCACAAATACTTGCACAAGGATTGTTGGAAGGAAAAGGCGCAAGAGATTTAGCAGATGCTATTGCCAATGTTC
GGTCCGTTGGGTGTGCCCGCGATGGAAGGGTGGAGGGTGGTCTGGGCGGCACGCGACTGTGCCAGCAGACGCGGCGGATGCGACAGCACGGACATCGGAGGG
CATACATCAACATAAAGTTGTTCATAATGTCTTCTAATGAAACATACTGATAACTCCCCCAGTTTTCATCCTGAGGAGAGTTTCCAGAGTTATTGTAGTATT
GCAGCCATCAGTTCTTGTCGGTCGTGGATAAAGCTTTACGCCAATAGAGATGACGTCAATCGGTGGCGCGGTGTTGGAGTCAAAGACACAAGTCCACACGCA
ACAGGAGTACCAAGCGCACCAACCCCTGCTCCCGGAACAAATGATACACAAATTGCAACTACAGCATTTGTAATAGGATCAATACCAGAATCTATCCCCTCT
GAAACGGTGGGAGATGGGCAGTCTGGACAATCCGGTGCAGGCGATGCAGCTGCCGAAGGTGGTGAACGGTCGAGATGTGCGGGTGTTGCCGGAGGATGAGGC
CTCGGGCTGTGGTTGCACATGCAAAAGTAACCCATAATGTGTGATCGCCACGTAAGTCTCATTCTTAAAAAATAGTTTATTCATTACACATACATTTTTGGT
GTTGACCAAACGGGCTACGGATGTTGTGATGGTTGTTCACTAATTAGTTGGCCCCCATGGTTTCTTGCCTGCTAGTGATTGTTAATAACAAAACATAACAAG
CAATACGCACACATAGCGCAGCAATTAGCAGAACCATTTGTGCCGAAGGAAAGTTATTTAGTAACAACACATGAAATTGTAACTGTATGATAAACGCAAATG
TATATTACCGGTAACTTAGATGTCACTGGAGATATTACACTTGGTGGTAATATTCAAATTGGTGACCAAACTAGTGATACTATTAATTTTGTTGGCGGAATT
AAAGCTGTAAAAGCAGAGGTATCAAAAGATACTTTACTTGAAGTTGTAAAGAGCTTCAGGAGATCATTATAGGCATGATTGAGGTTGAAGAGGAAGAAACTG
TAGGGTTAGATAAAACTCAGCCTGAGCCAAAGCATCAGCACCATTTTCCAACGATGTGGAAATGTTGTAAGCCTGTTGCCCATAAGTGGCAATCGATTCGGC
GGGTTTGCTTCGTACTCAGCACCAACTAAAGACGCAGCAAGTTCTCTGAAGCCATCATACGTTCTAACCCCAAGCAGAGACCCCATTTGCGCAACGGTTGGT
AAAGATTAAAGTTAAAGAATAATAGCAAAGGCAACCGCGCCGAGTATTTCCCATGCGGTTAGCTTTTCTTCGGTTTTTACGTTTTTCTATGTCTTGCATAAT
ACTATTCTCTTCTCCCTTCTTTTGCAACTTATACATTTGATGTAACAGTAAGTGATTTATGGTACAAGGCAGCAGACTTGTCAAGATCCTATGTGGCTTGGT
GAGGTTCAAAAATAATAATATTATTTGACACGTCAACAACATTAAGTTCAAATGCGATAGTACCAGGTGTAGACACTGGCAATATAGAACAAAATAGTTTTT
GAATTGGCCGGATGCATCGCCGCTCGAGGCTCTGGTGGACTGTGCCGAAAAGGAATCGGGCGATGCAACCAGAATCCTCGCCGTCCGCGGTGTTGCGGCGTT
GAGCCGAGCCCGGTTCGCCAGACGGTACAGATACTTCTAAACCGGCAACTCTACCTTGAATGGCATTTTCAAAACTGCTCACTGCAATTTCTTTCAGTTGTG
ACAGGCGGATTATAATAGTTTCTACAATAATCTAAATAATACGTTAGGTCCTGGGTCTGGTCAAAGTGGTTATGGACAATCACTAAACTTTCTCCGACATTT
CGCCTGCGTCATACCAAATTTCAATGGTGTTTTCACCAAAGATCCACGCTTCACGGTTGTTAACTACGTTAGCTACTACGTTATCGGGGGAGGCTTTTCCGT
GGAATCAAACCCCCGACCTTCGCGTTCGTAGCGCGATGCTCTATTCAGCTGAGCTACGTGGCCAGTTACTATATAAGATAGTTGGAGGAGCCGACCGGATTT
CCGTCAGTCTTATTGTGTAGAATTCCTTGATTTTTATCTTTTCTGCCATACCAAGATATGAGTCTGCGTTCTAAAGCAAATGCCCCATAGTTCGGTAAGACC
TATCTTAATGGCAAAAAACACTTGTCAAGCATTTTTCTATATAAAAAATAAGTTTTGCTTATAGATTTTTATTTCATGCTAANCTTTTTTTGGTCGATTACT
CCGTATTCAACTGTCGAGCGCCCGTTACGTGGGCCATGCGCTGATTGTCGGTTTGCTTGCTCGTTTTCGTGGTCGCTACGGAACGCCACTGCGCCGGGGGTC
TTTCTATGGTTTAAACAATTTAGATGTAACCGGAATCTACAATAAGAATGGAGTTCTTTATGCCTCTGTTTGGGGAGTCTACTATGCTCCTCTTCCTTTTGG
CTTCACCAAACTGATGTTGCCAGGGCCCGTCGGCAAACCGCCGGGGCCATTGAAGCTGAGGGTGCCCAGCTTGACGGTGTTGGTGACAAAGTTCCAGTCGAT
GGTCGGCCCGCTCCGGGACGAGGTCAGTGCGTCAGCGCGTGGTGCACGATGTTGAGCCCCATGCGCAATGCGGCGTCACGTTTGTCGGGGGGATCGTGGTGG
CCGGCCACGCACTCGGCCCGCCGTCGCCGGTTGGTGGTCCATAGGGGCCTAAGAACTTTGGTTACAAGGCCCGTGTCGACCGCCGCCACGGGCGCTTTGCCG
CAATAAAGATGAGCAAGGCGACTATGTGATTAACGACCTATTTGATAATCAGGAATTTAAGGTAGAGACCGACTCAATTCTTGATCTATCAGAACCAACCCA
CAAGACCTCACGCTCATGGGCGGCGTGCGCCAGACCCGCACCGAGTACGAATCCACCGACCGCTACATCGTGGGCAGCAACCCAGACGACAGCGGTCGCAAG
GAAAATTGTGCAGGGAACTTTACTCATGGGGAGTAAGGTAAAAAGAATTGAGAGAGCCTAAGTTAGTAAAACTTACAAGATCCTCCTGATTGGTTTACTCCT
AGGCTCATGGCCGCCTTGATCGCCGAGAGCCCGCCGAAACGCACCAGCACCGCGATCATGTCGTTGGCGGTTCCCTGCAGGCGGCGGGCGGTGGCCCAGTCG
GCTCCGGCGCCGACGTTCCAGATCGCGTCCATCGGGTTCGTCCCGGCGCGCAGGCCCTCGTCCTCGCACCAGCGGCGCCACTCGCCATCGAGCGAGCGGGCC
GAAACCAAAGACCAATAAGAAATAGGGTTAGGAAAACCTATAGTAAAAATGGATGTAAAAATAATAAACCATTCTGCTGAAAATCCTTTTTTTGTCGATTGT
CTCGATATGCTCATGGGGATTCTTACGGCGCTCCTTGAAAGGCTCCATGACCGTCTATCTCACAATCGAAACGCTGACGAAAGCGAGATCGGTGAAAGTGTT
TATTGATGTCCTGATGCCCCATCATCCCCTGAATGGCACGGAGATCGGCGCCGGACTCTAAAAAGATGGGTTGCGAACGAATGGCGCAGGCCGTGAGGCTTT
AATTGAGATAGCGGCAAACGGAGCGATTCCCGTCATGCTGATTTTGCTTGGACTGGAATTGACCCGCATCCAGTGGTCGCACAGTTTCCGCGCCCTGGGGCT
GAAGCGGACCTCAGCCGGTTAAAACTAAAGAGGGATGGCTTCATATTTATCATGGAGTTGCAACTCATTTTGGTAGTGCAAACATTTATCAAGCCGGTGTTAT
GCTTGCCATCGTCGGTGGTCCGCGGCGTGCGTGGATCGCCGGGCTCGCGCTCGCGGCCGCGGCGACGTTCCGGACCGAGACGCTCGTCGTCGTCGCGCTCGCG
CATGGCGGTTTCGAGGACCTGGCCGGCGAAGAACGAGACTTCTATACGCTGGCCGGCAGGGAGCTGCGCCGGCATTTGGACGACGGAGGAGGTACGGGACTGG
GATTTAGAAAATATATCCTTTATAGTAAAAAAATTTCAGGATCATGTTCTGTAGGTATTGATACAAATATAGTCATTTATTTCTTTTCTTTAATTTGTAATCT
TGTCGAGGAAGTTCAGGTCGCGGTGCGGCTCGGAGCCGGCGGGAAAGCCGAGCTCGCACCCAGGGGCGAGGATCAGCAGGGCGCCGCCGAGCAAGATGAGGTC
GAGGCAAAGTCGACTCTAATGGAAATTATCTGGATCTTTTTGTTGATTTTAAATGGTTTGACGTTTATTATACCAAGCTTACAATTGACCCTAATCCAATTGC
GCGTGGCATCGCCAGCTTCGCTCAACAGCGACTGCCACAGCGTCGGCGTCGCCTGCATCACGGTGGCGCGGGTCGCGGCGATGTGGCGCGCCAGCGCCTGCGC
TATCTTGCGGTAAAAATAAACCAAACCGTGACCGTGACCGTGACCGTTACAAGATAAAATACATTGGAGCATGTCCCTCGTTGATACACGTCCCTAGGCACAT
CGAGCCAGCTGTCGAAGAGGCCGCTTTCGCCTTCCATGCGCCCTTCGACCACGGCCGTATAACCGCGTTCCTTCACGAGCTCGTTCCAGTTGTCCATGAGGCG
ATGACATTATCGCGCTGTCGACATGGTTGCCGCACGCACACGCCGAAAACCTCGAGCCGGTGAGCGATATCGTCGAACCCCTCCTCAAGCAGAACGGCGACGT
GCCCCATGCAGTGGCGGCGGAACTAAATCCCTGTATCGGCTGGCCGGTTATGCGCTCCACCACGATCTGCCAGATCAAGTCGGGTGTAGGCCTTCAGAGGCTT
GACCGCCCCGTGTTCCTGCACTACCTGGTGGCCAAGGGCACGATCGACGAGCTCGAGATGGTTCGCCGCAAGACCAAACGCAGCGTGCAGGACACGCTGATGG
CTTTGTCCAAAACACTGCAGTAAGGCTCGCAAAACGCCCTCGTTATACGAAAACGCGGGGCTTTCGTCCTGCGAAAGTATTACGGGAAAGTCGTAAAAGTCCT
CCGCCACCCGCGCGCTCGATCGGGTCCTGCTGTCGGGCTTTTATGTGGTGCCGCTTTATTTCCCGCCCGTGACAATGGGTGGCGCGCTGGGCGCGAATCGCGC
CGGGGGCGTTGTTCGCGATCAGATTCAGCTTGAGCAGATGGTTGCTCGAAATGCGGTAATCCCATTTGGTGCTAATGCTGCGCTGCTTTCGGATATTGAAGTT
GTCGTTAATGTTTCCCAAATCTTTACCGTTGATAAATCCGACCTGGTTGATAAAGTTGGTCAAGGCACACTCATCCAGTTTGTTTGCATGTCCTGCGGACATG
TGCGAGTCTCGACGCCGGACTATCCATGAACGATGCCATGATCGACGCGCTTTTTGCTCTTTACACCATCGTGGAGGATACGAACGTACTGGGCCGATCGGGC
TAGTTCATAAGCTGGCCTTCACCCGCGACCGTCATGCTGTTGATGGTCCGCACGTACCGGGACGTGACTATGCAAGCACGGCTGAGCTCCTTGTAGATTTAAC
TATCGAAGAGGCTATGGGAGACCGTGATCGGATCAGCTACCGTGATTGTATGGAACAACTGTACAAGTTCTGCTGGAATCGTGCTGATAAGGTTTGGAGTAAT
AAGCCCACTGTTGCAACATACAATTACAAGCTCGGGGGTTATGTCTGAGCTACCATAATTAACAGCGGTCACATCAATTTGAAGGTTAATTGTCCCAAGAACC
ACCGTACACCTGATTACCAGCTTGCTCCTCAAAGTGCCGCCACCACTGCCACCTATGTTATTACTAATAAAAATGCAGGAAAAATTGAGTTCGACTATGTTAC
TCGGATTAATTGAAGTTAAACTATAAGAAGATATCACCGACAGCTGCAAGAATAAAAATGCAGCGCCGATGATCATCCCAATTATAAATAAAATTTCCATTTA
TGCTTGGGAAAACTCCAAAATGAAAAATAAATAATGAAATTCAGAACTAGAAAACTAATTAAGCCCGAAGATTTAAATGCTAGAGGTACACTCTTTGGCGGAC
GGTATCGCCTAACTTCAATCCCAAATGCCTTAATGCATCTGTTAATTTGAGCTAAGTCTTTACCTAGACTATCTGCTATCTCCAAACTTGTTCTACCGTGTTC
CATTTCAAAAACATTTTTAAAATGACCTTTCAAGCCAAACAAAATTGTAGTGCAAAAAAAGGCCATTAAGTTTTACACTTTGTCAAGCTTGAATAGTTGTGGC
GCTTTTGCCCTCAATGCACACAAGGACCAGATGCACGGATCAGTGCCCATCACGGTTCATCTGGAAGCAGTCGCTGGCAAGGCCACTGAGATGGCAAATAAGT
ATTAGAGTAATGTTTTAACTTTTAATGCTGTAAATGCCAAAAGCCAATCTTTGAAGATTTGTTTTTCTACTTCAGAATTTGCCCCTAATGACCAAAATTGCAT
TTAATTTTAATGTTGAATTGAACATGGAACATCGTGTGTCTAAAGCTATGTATGAGCTTTTATCTAAAGAGCCAAAAATGTTTGAAGCACTGATTTACTCAAC
GGGGCTGATTCGCCTCGGCTCGACGCCCATCAACACGCTGTCCATCTGTGTGGTCGAGAAGTGGGATCACACCCAGATCAGCGCGGCGGGACTGATCCAGCGC
CGGGTTGGATTTAAAGGGTTCAGCGAGAACAAGGCGAAAAATGAAACCCCGCAAGGGCAGGAATGTCGTTTGGTGACGAAAATAAGCCCAGTTTTGTTGACAG
AGTTTGTGGGTTGCCACCACTAATATAAAATTTTTCTTTTAAGTTTTTTTTTTTTNTTTTTTTACACTCAATTAATAGTCTTTTATCAGCGAATCCCATTATT
CCGGCCACGCACTCGGCCCGCCGTCGCCGGTTTGGTGGTCCATAGGGGCCTAAGAACTTTGGTTACAAGGCCCGTGTCGACCGCCGCCACGGGCGCTTTGCCG
GATCGGGGCCTCGCCGGCTGCGTACACCTCGGCCACGACGAGCGCGTCGGAATCCGCCAGCACCTGCGCGAACTCGTCGAGCAGGTCACGCGTGCGCGAGTAG
GATCGGGAATGAATAGAAGTTGGATCAGTGCAATTCTTGTCATGGTAGCGATCGCCGGCATCGCTGACGGCCAGTCAACGAACGCTCTGCGAGGTCATCTTCG
AACTTTCAGTTCCAACGCCTAAGTGAGATATACCATTAGTATCTTGCCATGCCCACAATGCACGAATCGTTGAATAAAATGAATTGATGTAAAATTTAGTCCA
GGTGTCGTATTTGAGCGTTGTAAATGAGCCTGAGGTGCTGGCATCGTCTGCTAAGTAGCCAATGGGAGAAACAGACTGCCAGCCACGACCTTTCCACCACACT
TTTCTACACCGCGGTTCATAGGGCCTGGATGCATGACGATCGCGTCAGGCTTGGCTAAGGCTAAACGGGCGGGAGTTAAGCCATACTGCTTAAAAAAACGCAT
TACAACCTGGCGCGCATGAACATGCTGCTGCACGGGGTGAAGGACACGGAGTTCGAGATCTACCACGGCGACACGCTGACCAACGATTGGGACATGCTGCGCG
GCAGCGGAATATCACTAGCTGAGCACTGCTTCCAGTCTTCCACTCTATTTTAATAATTTAAGTTACCTCGTTACGTTGCATTGATTGTTTAAATTACAACAAT
AAAACAATGGATAGAAAAATGTTGAAATAATTTGTAACTGTTCAAAATTAAAATGGCAATTTTCATATTATAGAGACCACGTGGTGCACACATAAGATGATAT
TTTCTTAATGTCGCAAAATGATCTGCTGCTGCTTTTCTTGCAGTATCAAATAATGCTTTTGTATCTTGACCAGCGCCTTCCACAATATCTGCATTGTTTAAAG
AGCGCAAACATCTACCCAGCCAATATCTTTTATGGTCTAGTAGGCAGCGCTATATGGGCATTTGCTGGTATATGGCAACGGGATATACCATTATTTTTAGTAG
GAGTCTCATGTGATTCTCTACCAATATGACTTATTAAGATAATTTGTGCTCCAGAGTTTCGTAAATATGTAATCGTTTTAAGTGAAGCATCAATTCGAGCTGG
AATATCTATTTTAGGAGAAGCAATATCCAATCTCACTGTTTCTGTTTGATGAGAATTTGGTTTTGCTCTACTGGTCGTTGCTCTATTGATGGCACACCCCTCT
GGTACGCAGACGTCGTGCGGAGAAGAGCTTATTTTAGTTGGGTCGAAATTCCGGCGAAGGTTGTATTGAGGGTGGTTCCGATCGCATTCACACTGGCGATAAT
CCATTAATTTATAAACCTATATATATACAACAAATATTATAACAATAGTAAAATATAATAGAACCTTCAATAAATCTCGTTGGTCGTATTGTTTTACTATCAG
GGTGAAACTGGTTCTACCATTGAAAACGAAGCAAATGCAATGGCTGGTGTATTATTAAGAGATTTTGGAAAAATAAACGATAGTATTTACGAAAATAAAAAAT
GTAAAAAATATACTACGAAAATACAATGAAATTATGCTTCAATCGAGCATCATTTTGCAGCATTTCCCAACACACAACAAGTAAATTATGACATTCAACGATT
GAATGATGGGCGGCAGCGGGTTTGCCCCTAGCGCCGCTGCTTCGACACCTGGTTCAGCGCCGATGGATTTTGGTGCAGGATTTGGAACTACTGGCGGCTCTGT
GGAACCGGTTACGCGAATCTAATATAACGCCACAGGGTCGTCGATTATGTTCTTTGTGGATTCTGATACTGCGCGGAGCGTAACGCTTACTTACAGATACGCC
GAAGGCGTAGTCGAGGGCTTCGAAAAGATCCGAAGTACGGCAAGGATGTCGTAAAAGTCCGCTTCGCTGACGGTGTGAAGCGCTTCCGCGCTGATCGAGTATT
CCAACGCCCACCCCAACCAAACCGCCACCATCACCACCAGCGAACTCGACTGGATCCACGCCATATTCAGCGACGCCTTCGGCGGACTCCCCACCACACCCCC
GAACGCGCTACACAATACGAATTCCCAAAAGCAGCTGGTGCAATCATGACACGAAGCATTCCATGCGCGGTTCTCACAGTGGAACCTTGCGGAAGCAAGCGAT
GGGGGATTTTTTCTTAGGGTCATGATGGGGGTGGATTGACTAGGGACGTGCCGGGGTTCCGACGACAAAGAGAAATCAGTCTTTCCCCATGATGGTTAAGCGT
GAACATTGGCCAATAAAGCTCAAATGCTACAGTATCTTCCATGGCTTCAAATTGATGATATTCTCCGGGCTTTGCTACATGCCAATCGCCTGCTTCGAGAAGT
CCTACGGTAAACCGCGCCCTAAAATCAGGCAATCCAATCACTCGTGGAAAATTCACGGGCTTTTCGATTGTGTACAGTTGACACGCATATTACTCAGAGTAAG
GAGTCTATAACCCTGTTGCTTAGCCCAGTCAACCAACTTTTGCTCCGCTTCATTGTAGAAACTCGGCATACGATGGAACATTGGTTTAAGTGCTTCTCCGCTT
AAGAATATACGAGTATATTGATGCTGTGATTTTCTGGTGCCAGAAGAATAATCTGGAGGTGGAGACGGCTGCATACTGGATCAAGAAGGATCCTGTCATGAGA
CAACTTCACTTTGTAGCGCATGAGGTCGGCCATCAGCTAGCCGAAAAAATATATGGATCTCAAAACTCAAAGAAAGTTGAGACCGACTTACAGGCATTTTTCG
TGCCGGACTACCCAATGCGTTTGGCGGTTACGACGAAACGCCGGAGATGCTGGCCGAAGATATCCGCGAATGGGCCGAGCATGGTCTCGTTAATATCGTGGGT
TGGGAACTTTATTATAAAAATGGTCAATTGAATATAAAATGCAATTATATAGAAGGTGAAGCTGATGGCTATTGGGAAAGTTATTGGGGTAATGGTCAATTAC
ATGTTGGGTAGAATTTAATACGTGAGGTGTTGTTTTTCACCTATCTCAACTAATACAGAGGCTATATACAAATTACCAAAATCAATGGAACCATTTCCGTAAG
CAGAAAACAGATATTGGCCCAGTTGGAGAGCATGGTCATAGTGGAAGATTGATCACAACACCTTGGAAGCGGCTATCTCTATAGCCCGAACCATGCTGTCCTT
GATCGACGGCGAATTCGACCGCGAGTTTGTCCAGTTGCTGACCCCGGCGCAGCGGGAGAAATTTGGGGCGAACCAGAAGCGCTGGGCCGAGCGCGATGCGAAG
GGTGGCGAGGACAATTGGCTCTGCCACCTTCATCCGCGTTGCCGTTCTTCTTGTTGCTTCAAAGGAAACGGCGGTGCGGTGGACTTGGTAGGTGGCGGTGCCT
CCGTAAACAGGTGTTCCCACTTCCTACGAGAGAACCTAGCCCAGTACTCATGAACCTACTTCAGTTCTTACTACAGTCAGGTAAAGAGCTGGCCTCCGTCGCT
CCCCACAGGCGCACCTTGGCGCAGATGGAAGTTGTCGCGGGCGACACCACGGTGGGGCACACCACGGCCTTCTGTCAGCTGGTCGAGGCACTGTCCCAGTGCC
GAATTCCTTCTGTTGACCGCATAATCTTGTACTGAGAGTAAACTCCATATAATAATTTTCTTAATTTTTTCTTTGTAGTTTCGCTCCATATATCCTTTTCCAT
TCATTTTGCTGGAAGAGTACTTGATGGTAAGGTTAATGATTGGATAAAAGCCGCAAAAATATAAGCGGTGGTTCATATTATGATCAAATGGAGTCTTTGTATG
CCCGCATGAACTCGAGGCAGTCGACAGAGCACCGCAACGGGGGGAGTCGAATCAGGGCACGGGATTTTCAGCCAGCGCGAAAGGCGGGCTACCGGTAGGCGGC
GAGCTTGACCAAAAACTTACCAGCATACCGAAGCCAGTGTATGCAAATACCAGCATTGTCCCGGTAATCAAACCCCAAATGATCGCTGGCAGCAGGACTTCAT
TTGGTAGGACTTTTGTATCGCAAACCCGTGATGCTGGAAAAGATTGAGAGGCTTTTATATAGCAAATTTATAAATAATTTTGCTAAGTTCTCATCAATTTTTT
GGATACGTAACATGAACATTGAATCGATTTAATACTAATTTATTTGCTTTTTTCACTTAAAGTGCCTACAAATATAGAAAAAATAGAATGTTTGAAACATTTT
CCCATCTAAAAAACTCATTATTTGGGGTTATGCCTCTAAGAACTCGGCAACTGTAGATAAATTACTTATTTACAACTTCCAGACTCAGAGATGGTCTAGTGCG
CATAAAGCCTATGGTGATTTCATATTGTGTCATTGGTTAATCCTCTAAGAGAAGGGTGAGTAGGAATAGGGCAGCGCCAGCCAACAGGGCTGTCATTCCGCTG
GACATGGCCCGCATCTACGCCAACGAAACCGACAACGTGGCAGCGGACAACCTCATCAGCGGGATTTCCAACAGCAACAACTTCACGGCCGCCAACATCGCCG
GGTTATAGACCCAAGAACAGGAAACCAGCTGAATTTGGAGAATTATATATGGATAAATTAAAGGATAAAGAAGTAAGTGAAGATATTGAATTTAAAAATGGCG
TCCAAATAAGTATAAGATGTAGGTGCTATTATGAAACAGCACTTGTGGAAAGACGATGCTTCATGCTTGGGTCTTGATAATGGTTTATTTTTTGATACCTATG
GAACGCTTTGTGTCTTGCGCAGACTCTGTTTGTGCACGTAACCGGTGAAGGGAAAGTGCGCGGGTCCCTGCGTGGGTTCAGAAACCCAAAACCCGTCACCGGG
GAAACTTTGGTGGACCTGGTGACGTTATAAATTACCCACTGGAACAATCAACGGAATCACCAGCAATTACGTCAATCTTCGTTCAGCCATTGATTACACGGCC
CCGCGCCGGAAGTGTGGCGAACCACCTTCGAAATCTCCTCCAACGGAACAGATTGGACAATGTTGGGTGCTGGCATCCGCATCTCCGGAGGCTGGCAACTGGG
AATAGAAAAGAAAATGAATGACAATTCGATTCTATGAAGTGTTACTGTGTGCTTTAAACATGATGATTATTATCACATGTTGCTAGTTAAACTTTTTTGTCCG
TAAATGTCACACTTGGTAAAGTCATCTACATCGATTTCTCTTAGTGCGTTTTTGATTGCGGCTACTTCCGCATGAAGGAATACCGCATGTTCATTCTTGCTAT
AGTTTCAGCTGGTTGCAGCATACTGTTGCTGTGAGAACCAACGGAACATTATGGACTTGGGGTTAGTGGTAACAGTGGTAGATTAGGCGATGGAACAGTTGTT
GAGGCTCTCGCTGATGCTGAGGCTCTGCTCGCTGCTATTGAGAACGCCGCTGTTGTATGGCCTGATCCGACCTGCGATGTCTGCGGCATATCTGAGTACGACA
GGGCGCTGCCCGAACGGATCAAGCCCGGCAACGATCCACGCCCCGGCACTGGCGCCTTGCAGCGCCGCCGGTTCCGGCCCCTGCACGCCCAGGACGATCTGCG
AACAGCAGAACTCGTAAAGACCGCCGCAAACTCATTCCTTGCAACAAAGATTTCTTTCATCAATGCAATGGCTGAAATCGCCGAAGTGTCTGGCGCAGACACT
AATGTTGTTATTCTTCCTTTAATATCTGCGTCTGGAAATTTTACTTCAAAACCATTGGATCATATGAAGGATATACTATGTTGTTTCTAGTTGCTCCTTTTAT
TGAAGAGCTAGACAATTTGATGATTATCTATAAAGGCTTTATCGGATTACTAGCATACAAACTTGAGAAAAGCTTTCACATAACAAGGAACATGCTGAAATTT
CTACAACTGGTTATTTTTTCCAGTAACAGGGCGTCTTTTTATTTCCTAGCTCTGACAAATCATGAGCGAAGGCATAGAGCCGTTGCTTTTAATTTCTTTAGGA
CGTGGGATTGCTGTTCACGCGAAATTTATCGTGATGTTTTCGTTCAAGTCACCGAGCGAGTACCAACACCGGCTTTTGAAGGCCGACCGGGTCATGCGCGGTG
CGTTTGTCCGTGCTGCCGACAAAATTAAGGTGGCGCTGGCTGAAGACCTGGGCGGAGATGTGGAAACGGCCATCAACCAGATCGGTAAGATCACCGAGATTTT
TAATTGTTGTTGTGCTCATTAGCGCCCCGACTTTCCTGTGTTGCGTACGATGAAATTAGCTGCGCCGTTAACAATCAAGGTGAGAACGAAGAGCACAAGTCCT
AATTCAATATCGCCCGCCTCATTCGTGGCCAGCGGGGCCCACGTCGTGTTGTCCTCGCGGTCAGACCATTGCACGCGCCGGAAGTTACCGCCCGGGCCGAAGG
CATGGCCGCACTCATCGAGCCGCTCTTCGTCGCCGGCATCGCAACGTTGATCCTCGACAACGCCGGCCACGCCGAGCCGAAGCGGAGCCGCGGAGCCAGCGCT
AAAAATAAACAACTTATGCAAATTTTTCTATCTTTATTTTAGGTAAAATATTAAATGTTTTTTGAAATTCTTCAATCATTACATCGTAAACAAGCTGTTCTTT
AAAATTAATTTTTTCACTTCTTTAGGCTGTTCAATTTGTTTATAACTCTAAATTTTCTTTAAATTGCTTTTGCCCATGTCACGATTTTATTTTTCTTTCATTT
GACCTACTACTACTACTAACTCTTTAAATAAATAAACCTAGATCACATGGGGCTGTGGCTATGTGCACAACTTTTGACCCCGCAAGTGTCATGTTGATGGGTC
AATACATTTTGGTGCCGTCTTCAAACTCTATTTCGTTTGTGTGTTTGAGCCCATTATACACCACGCGATCAACTACTTCGACCGAATCTCGCCCTTGAATTTC
TGTTGCTGGATTAACTGGTGATGCTATGTCTCTTAATTATCCAGAATCGGATAATTCTAATAATGTACATATAGAATGGGGTGGGGGTGTTCACGGGGATATT
ATAATTGTCAGGAAAAACATACGCCCAATTCGTATTCCCATAAACATCAGTAATATTATTTTCCAGCTCCAATACGCTTATGACCGAAGCATCATAGTACGTT
CCGCGCCGGAAGTGTGGCGAACCACCTTCGAAATCTCCTCCAACGGAACAGATTGGACAATGTTGGGTGCTGGCATCCGCATCTCCGGAGGCTGGCAACTGGG
TGTTGCGAGTGTTCGCATATTGGCTGGGAAGTTAATCTGGTCAAGAATCTTGCCAATGCGTGTTCCGGTTGACTGCCCTGCTCCTGAGTCTGTAATAGTCTCC
CATCCTGAAGCACACACGCAACCACACGCCTTGTCTAGGTGTTTCCATCCTGAAGCACACACGCAAACATACGCCTTGTCTAGGTGCTTCCATCCTGAAGCAC
CGCTGCACCCGGGGCGATCTGCACGAGGGGCGGGTCAGTCTCCCGTTTTAATTGGGAATTGAGTAGACCGTCCCCGAATTTCTCGATGAGGGGAAGGAGGCGG
GACGCTGTTTTCCGCCGAAAACGAGCGATTCTGGGAACATCCCAAAGCACGCATCATCCAGGAGGACGCCCGCAATTACCTGACCTTCACTCGCGAGACCTAT
GGACACGTCGTTAAACCAAGTAACGGCTGGTACTCGCGCGTAGATACAACAACCGGTGAAGTTGAAGAAAAGAAGTTCCGTGTTAAAGATACTGATACAAAAG
TCTGGTGGAGCAGGACCCTGCAGGCAATGTGGGTGAATTACAGTATAAGGTATCAGGAATACAACTAGGTGGAGTACCTAATACTTTATACGATGGATCCAAT
GTGCACGAATCGGCGCGGCCATCGCCGACATGAACGGCGGCGACACTGACCGCATCATCACGCACACGTGTTGGTGCGACGGGTGCCACCTGGCCGATGACGG
GGTCGTGTGTCATCGTCTGATTACCTATCGTCGCCAGCCTAGATATGTCAGTAGTTGTATATACAATTAATGCCGGAAGTTTATCCTCGTCAAGTGCGTAACG
CAAAGTACAAGCTAAGTTAAATTTACTTTCAAACGAGTATAAGGCACTTGCAACCCGTAAAGAATTAGGAATAGCGTTAACAGATAAGGAAAGCGCAAGATAC
AACAACTGCACAAAAGCCCGCAATCTGCTGAACGGCAAGCCCGCCGAGGTAATCCCATGAGTGACAGCGACTTACATCAACCTCGTGCAAGCCACACGCGCCG
TTTTGCCTGTTCGTCCGCTGTTTGTTTTCCACCTACAAATACGTTACCAGCCTGAGATCCTTTTGTTCCAACTGCCGAAATCATTCCAGAATTAGGATCAACT
TGTCTGAAAGGAAAGTCTCTGGCAACTTTTCGTAACAAAAATATCGGATTCGTATTTCAGTTCCACCAGTTACTACCCGAATTTACTGCTCTCGAAAATGTCT
CATGTAACCGATGAAGTTTTGGTGTCTGTCCTACGGCACAGGGACTTGCTTTCGAAACTGATGGGTACATATATGGAACCGTGGGCGGCACAGTCCGAAAGAC
GGGTTTTGTGGGGGGGGGGGGCTGTGGGGGGGGGCTGTGGGGTCGCGGCGGGCTGTGTGTGTGTGTGTGTGTGTGTGTGTGTGTGTGTGTGTGTGTGTGTGTG
TACGTTAATCGTGCCAGTATCGGCAGCAGTACAAACCCCAACCCGTGTCTAAGTTAGTTGAACCGTTTAAGGACAACTGTGTATGAGCCTGGCACTTCTGACC
TATCTGGAAAAGAAGAAGTGCTTTCGGCGTGGAAAGTCCTTTTAGCAAAACGAATTTAATATATAATACATACGACGATGGAAGTTACAGGAAAATTAAAGTT
CTGGGTTGTGATTAATAGCTTCAGCAGCTGCTTCATCTTGGATAGATAATTCCAAAGCTTCTTTCTCTGCTTTGATTAAAGCAACTTCAGCTTTCAATTTTTC
CAGTTGGTTTGGTTAGAGATACCTTCATGCCGCAGGAAGTGATCGATCAAATAAATGCACTAGGTGAGGTTGTCTGGAATACAACAGAGCAACAATTTTCACA
GTGCACATAGATCGAGGTGCACCCGGAATTATCAAAGGCACGGTGTCGCCACCGCTCTGTACGATCACGCCCGCGCCCTCAACCCCGACTTGCGTCACTCCAA
GCCTTTCTTAAATCTTCTATAGCATCATGCTTTTCATCTGCTCGCCAGATGTACTTAACTGCATTACCTAAGCAAAAGTTCATATGCTCAGTAACTTCTATAC
CCTCTTTCGTGGGCTTCTGACCCAAGCCACAGTCATATAGTCCTTGCTCAGGTTGGGCGAGGTATTTTTGTATTGTTTGTATAAGGTCATTTGTTAGATGGTC
TGTCTGAAAGGAAAGTCTCTGGCAACTTTTCGTAACAAAAATATCGGATTCGTATTTCAGTTCCACCAGTTACTACCCGAATTTACTGCTCTCGAAAATGTCT
AAATTGAGTTTGTAACATGGTGTGATGATAAGGACAATGAAAAGTGGGATATGATGTTGGATTCTGCTAAATCATGTGCTGAGATGCGTTTAAATGATGCAGG
GAAGTATTGCAAAGCCAGAAATAGTAGATTTTGATTCAGTTAGATTTTACAACATGCAAGCCTACTAAACTTTACGTCAGTTTGGGGGTTTGACATTGGTTTT
GATTCTTACCAGCTAACACTCGTGAAATTCAAGTGCTAGACGGATTCTCATTCTCGCAAAATACTACTGCTGAAACCAGTTACACTAACCGAAGGTGGTGCGG
GACAGCCTCACTTCACAGCCAGTACTTGCTGGATCATCTATCTACGGCCTCTTCACCTCTGTAACTGCTGACGCAGGAACCATCTTAGCCTACATTGCGTAAT
ATAATGATCGAGGCATTAGCTTCAAAGTGTTTAAAGCATCAGGCGGCACTATTATAGAAACCAGCTTTTACGATCGTCAAAAAGATCGTCATCAAAATAGTCT
GACGCTCAAACCGTCCAAGATTTCGTTATCCGACTCGCCCGCAATGACAACCAACGGTCACGCAAACGGGGCGCTCGTTCGCGGACTCATCGACGCGAACCCG
GACGAAACTTTCAGCCATCGTGGCGCTCGAACTTGCCCACAAGTAGTGGGATCTCCAAGTCCCCCACATCGAGGACACACCGCCACCGAGTCCCGGTACGGAC
GGTCATTGGTTTCTCAGCCGTATGTTCAATATCCTAAATGATTGATTAGAGCTTGTGAATCTTCAACCGGTAGTGCATCAAACTTATGTTCTGCAATCAATCT
GATCTATAATTGTTTAAGTTTTTTCGCTCACTCGGTAGTGCCATTGTATTGTTATCTGCGTTGTCAGTCAATGCCGGTACCAATGTTGTGCCGCTCACGGCGC
GCCACAGAATAAGTTACGAGCACACGATCACTTGACTTTACCTCCAGCAAGCGAATCGCCCTACTCACTAAGGACTCGGTTCATCATATGATTCACCTGTGTG
TGGTTACAAAGGTCATGGCCATTTACTTCATCGTAGTTACACATCTTCTCAACACTTGAAATCGGATTACGTTGTTTTAAATCATTAGAACAAGCCGTACCAC
GCGGCGGTGGCAAAGCTGCTGCGCGAGTATGACGAGGTATGCGACCAGTTGGACTTCGCCACCACGCGCAAGAAAGAGATCATCGACGAGCTTGCGCTGGCGG
ATACCAACGGGTTTCCGCTGCCTTTCGCTGCACTGAGTGAGGCTAGCAACACGGATTACCGTGGTATCCCGACGATGACGTGCCCGTGTGGTGTGTGACGTGG
AATTGATCATCAAGTAACTAATGTGATGATCAAAAACAAGACAATCAGCCGAAATACCAACAGAAAACCGCAATACATTCTACACAGAAGTTACAGACCAGAT
CAGCCCGGGAGTTTAGATGAGACCGTTCAGCAGCGCGCAACACGTCTTTGTACTCGTTTTGGCCCCATCAAACCCCACACCAGTGCGCCGCGCCGAGCGCATG
GAAACATAAGCATCATCATCATTAGATTCTTCTCATCATCATAATCAAGGTAATACTTGTCCCACAGATATGTTTGTCGTGCCCTGCTAAAAATATCCCAGGC
AATAACAATATCTTGGTTGATACCAACTTTAGATACAACAATTCTTGCCACCTCAGAATTTGCATCGGTGACAGTAATACTAACCTCATCATTTTCGCCAATG
GGCGTAGAAAATGAGTAACGAACTACCCGCCCCATACGTTGGCGCTAGTGACACTTCACGCGCCAGAGCCATAAACGAAGACCTAACAGGCACAACAACACGT
GGGGTGAAAAATGAAAAAGGAACACAGGCACCAGCATCTATGTCAAAGCCAACTGAAGGCGCGATGGGATCAACAACTAAGGTGGCAGGCGGTAAGGTGATGG
CGCGGTTACAAGTTCAGCCACTGCACTGATATAAAATACAACAACCACAAGCAACAACAAACACAAGCAGCAATCACAAGCAACAATCACAAGGAATAAATGT
AATATAAAAAATAAATTTAATATCTGAACTACCGTCTGGCGAGCGCAGTGATTTTAGCCTAGTAAACTTTACAAATTTAAAAAATTATATGTAGCCGGTGGTG
CATTCACCCAAGCAGCGCAGAAACTTGTGGTTCGTAAGCTGATGAAAATAGCATTACGGAAGGATGGGACGCTAACGCCAGCTTGGAGAAAAGCGCAATCTAT
CAAGCTATTGTCTCCCAAAGTTATCAGGCCGATGTTGAGTGCTACAACGATTCCCAAGAACGTCTGCGACACTATTCTAAAATAAACAAACGCAAACGTCCTT
ATTTCCAAGTGTTTATGGACTCGTCCAAAAGCTGGCTCTCAAGTTCCAAGTGCTTTTTTTCTCTTTTCGTCTACCTCTTATACGACATACTTGTGCTAACAAG
CCACCCTGCTGGCGATTGGCACAAAGGAAGTCCGCCAGAAGCGAGTCAAGCGCAAGCGCGTGCGCAAATACATCATGTCCGGCGGCAAAGTGCTGGAAGATGC
CAGTAAACAATTTACCGGTAAGAATATCTACATTTACCGGAATAGATGTACTAGTGTGGTCTACAGTATTATAAACAATCTGTGGTTCAATATTAACAAAAAT
GCTCAGTCCCACGTCCTGGACAAGGTTAACGGCATTCCCGTCAAGAGCCTGACCCACCTCGTCGAGACACTGCGTGACGCCAAGGAGGAGTACATGGTGTTCG
CAAGTTGATTTCCTGTTTGTGGCTGGCCTACAAAGAACAGCAATGGAAAAACATTCGTTGATTGGTAAATAACATCACGAAAACAGCACGCAATCATATATAG
CGGGGGGCGTGCTGATCGACGGATTGGTGATCTCCACCTTCAACGGCGAGAGGTTCTCGCTGAGACACGCAAAAGGGGATAGGCAAGGCACACAGGGGATAGG
GAATGCGATGCGAGCGTTTGCTTCGTTTTGACCAGGAACCATGACTGCGAAAACTCCGACAAGCAGAGACACGATGGTTAGTGGAATCGCTTCAATCGCGACG
GGCCATGAAGCGGTCGTAATCTGGAACGCCTTGTTCGTTCATGATGGTGTCGCACAGGGAGACGTCATCGTAATCGCCAGCAGCAGCTGCGATTGGAACAACC
GCCTTTCTTAAATCTTCTATAGCATCATGCTTTTCATCTGCTCGCCAGATGTACTTAACTGCATTACCTAAGCAAAAGTTCATATGCTCAGTAACTTCTATAC
CAGCGTTAATCGCTGTTCCTGTAGTGGCTCCTGAGCCCGCCCCTGTAGCTATAAAGTACTGCCCTATTTCGTTTTTAGCTGCACCGAGAAGTGTAAAGTCTGT
GATTTGTATCATAAAGAATGGAGAAAGCGAGAAGAAGTAAGGGAAAGACAACGAGAAACTTGCAAAAGATGGACAGAAGATAATTTACAACAAATACAAGAGT
GCCAGGGCCGCGCAGGCCGCGCCCGCTGCCGGGGAGAAAGCATGATGAAATCACGGGCCTGGTTGTGGGGTATCCCGCTGGTCATTTTCATGGGCTTTGCCGT
AGACTTGTTAAAATCAGTTCGAGAAAAAATTACAACTAGTGATAAACTTATTAAAGATTTAAACTTAATAATTAAGGTTATTTATTTGATTTTTTGGTTTTTG
CACGCCGTTTTTCTTCCCCAGGTGGCGCCGGAACAAGGATGGAATCGTGAAGAAATGCTGGATAATCTTTGCAGGAAGGCAGGCTTGGAAAAAAGGATGCTGG
CATTTGGCCTCTTTATCTTTATCGTCAACGCGGCGATGTTGTCGCTGACAGCACGATGGTCAGAGAAGTTAGATGTCACCGGTTTCTGGTCGGCGCTATTTGC
CAACAAATTGTTTATTTGCTGCATCTAACGCGTTAACTGGAGTTGGTACTTCCAGCCGATCATCGCTTGTTAATGTTACAATTGATACTGGGGTTGTAACATC
AGTGGCTCAGGTACAGCAACATCAACAGTGAGACCACCTACCGATGCATCTGACTTTTTCTATTTAGGTACTGCCAGAGGACAAAACCCTTCAAGTTATAATC
GGTACGCGTTGTGCGTGGCGTAGTTCGTTGCGCCGGCGACCTTCCCGCGCTTGGCGGTCAGGTTATGGCCGGTGCAATGCACGTCCGTGTAGTTGTAGGTCGT
CTCAACAATTGCAACAGCGCTAAACATGGCGACCCTATCTCTAGCCGTCTTTTCCGCTTGGTTCTTCCCCCTCAACGGGGCGAGCCTAGCGGGGGCAGTCCTC
GATTCTAATGTCAGGGTTATGAATTCAAAAGGTGACCTTGAAGAGGGACGTAAACTTTCTGAAAAAGTTTTCGAATCTGAGTTTCTTGATCCATACCTGGCAC
CCAGAGCTTAGGATATACAGACTGGATAGTGTCGTTGATAGCCTGCTTGATATTAGTACGTGGGTATGTTGGTGTCAGGATTACCTGAGAGTTAACTGCGTGT
AGCACACGCACTGGCAGGAAGAAGCCAGGTCGGCACGCCACCCAACGCTCGCCGTCGAGCGAGATGCCGCCGCCCGGTACGATCATGTGGACGTGCGGATGAT
CACTTGGTGATGACGGGGATAGCATCGGCAACGGTGAGACCGTTGAGAAAGTCGGAGTTGACCATGATGCCGGTATCGTCCTTGAGGGTGAAAGCTTCCTTCT
GGTTCCTCAGCGAATCCGTCCGGCGTTTGCGCCGCCTGTTTTCATAAGATTTCATAAGACCGATCTGGAAAGGCACGACCAGGTTCGGCTTGGTCACCAAGGC
TAATTGGTGGACAAACTTTATATACTCATTCAATGATAGTATACAATTTCAAAACGAATGTTTGAGGTTGGGAATAAAGTTTGTCCAATGTAAAGAAGGCGGT
AATATAAATATGATATAAGATATAAATATAGATACTGTAATAATTGTAAAATATTATTTGATATTGGATGTGTTCATTTTGTAGGAGGAATAATGTCTTATGT
GAAGACTTCTTCTTCCGGCCGACGGAGAGAGAGGGGCCGATCCTTTCGCTCATGCCGAACTCGGTGACCATTTTCTGCGCCATCTCCGTTGCCTTGGAAAGGT
TTGAAGCCTTTAAAACTTCCGTGGCAATCTACGTGAAATGCACCAGCCATCTGCTGTAGGCAAAGTAGTGTCATTTAAAGAAGATCGTTACTTTGACCCTAAC
GATACCAACGTAGTCATAGAGTGGTCGGACAAGTATACAGGAGTATGATATGGTACAGCACTGGACAAACATTCCAGGTGAGTCGGCAATTGTTGGGTTAGGC
TACTTACAGTTACAACTGCACTCGCAAATGCGGCAGGCCCGACACCACCTTTTCCAGTAAATGCCTTCATATTGGCATTATTCATAAGCATTGCATAGACGAG
CAATCTGAATCATTAGAAGCGGGCCGCCCTTTGTGACCATAAATGGTTTTATAACTTCAGCAAGCTTTCCAATATATTTTTCAGCTGCAGCCATATACCTTGG
TCTTTTTATACTTATCCCAGGGTCAAATTAATTTTTTATTATAAAAGTTCTTAAATTTGAATTTTTTTTTAATTTTGCAAATAAAATGATTTGTTTTAAAATT
GGTGCTAACACTATTTGGCAGTTTGGCAAAAATCTCATGAGCGCTGACTTTGGCCAGAGTTAGTATCTCCAAAAATACTTGCTGCTACATAGATCCCATCATC
CATCGGCGCCGACATCGCCTGGAACACCGAACGTGGCGACCCGTCGATCGTGATCGGCGTGATCGACACGGGCCTCGAGACCACGCACCCCGACCTCGCGGCG
AGAATAAAAAAGGTAGAACAGCGAGTCAAATTTCCCACACATAAGTGCAGTACACAATGACACGTGAGACTTCTTAACTTCCGAGTTCGAAATGGGATCGGGT
GAAGAAATTCTGCGAGTGAATGCACTTGATGTTGCTCGCGCAAAAACCAATGGCCAAGATGCTGCATTTATTGACCGACTCACTATGACTCCGAAAACAATTG
CGTTCGAGGCCCACGCCGCGATACGACTTATGTCACTTCGGGCGTAAACTCAGCAGGCAACTTGTCTGGTGGTTCGCGAGACATTCAATGGGGCTGGAACCCT
CATCCTAGATACGACATTTTAGTTCAGAGCATTGCAAGGTAAGAATGGTCTTAAATGGCTCAATCGATTTCTATTCATCATTTTTTTTTTATTTTAATTTAGT
CCGGCGATGGGACGACACTCGGATGATCGACCCACGCGGCATGACATGGGATGACTGGGCAGCTTCAGTTATACTGTCGGTCAACGACGCGTGGTCGTTCGGC
CAATCGTTTTCGGATGTGGTGATTATGTAACTCAAGGCGATGAAATCTATATCAAGTGTAAAGACGAATATACTTTATGTAAAAAGTTACTTACAATTGTGGC
GTTTGACTAATGCCAAGTGGAATCATGCACAGGTCACTAATTCAGGCGGCACGTTTACTACGGCGGTCAATGGCGCAAATTACGCGCTGATCTATAACGGCAC
CGGCGAGCGGCGCATCCTGTACGCCGGCATCGCGCGGCTGAGTGGCCCCGCGCGGGGGCGCAGCCTGCGGCCGTGCGGTCGGCCACCGCGCTGTGCATCGACG
ATTTGAGTGAGTCATACAGTTTCCTTTCCTATAATCTTATAAGTACCACAGATAGGAAATTAAGTAAACATCTAAAAGTAGGTTCTTCCATATATAAGTTGAG
GTCAAACTACAGCTGATTGCTCAGCAGTTGGAGTTTCGATTTCAGCAAGTGCTGCAGCTTTAGTTAAAAGCTCAGCACGATTTTCTTGCATGCCTTTAATTAC
GGCCTTCGGGGCGGCTTCAGCGACTTTTCTCAAATTGGCGAGGCCTTCGAGGAACTGATCACCGCACATTTTTTCGTCAGTCCATGAAGAGGCCCATGATCTT
CGTCGGGCTCGTCGCCAGCACAATGTCGCCAGAGCCAGTCGTCGAATTGCCGAGAGCCGTGACCGTGCCGCTCGTCGGGAACGTGACCGACGTAGCGCCAGTG
AGGCCCCGAAGTTGGCCTTGCCCACCCGCTCGGCAAGCTCGGAACCGAGATTTTGCGCCACAGGCTGGGCCAACGCGTCCGGCGCGGCCTTGGACTCCAGCAC
TACATCGCGCCCCAGTTGTTCGTCCAGTAGCGGGTCTTAACGGTGCGGGTGAAGCTGCCGTTCATCGTCTTGCCGCCATCCTGCCCGGTGGTCTTGCAGACCT
GGTGATGAAATGAAAGGTGATGTGCATGTTCTATTTGATGGAGCTAAATTAAACAATAATAACTTTACAGCCTTTATAAAGAATATTCCATTTATAGTACAAC
TACAAGAATCCGTGGACGGGGCCAAGACCGCGTGGGCGTGACGTGCAAGCACTGCCCGGCGACCGCCGATCTGCCGAAGTACTCGGCGTTCTCTGGACCGCGC
GGAACGTTATAGTCATAAACACATCTCTCATCTTTATGGCGTGTGGCCTGGCGATGAAATTAATCCGGATAGCACTCCTGAGCTTGCAAAAGCTGCAAAGATTG
CAGCTTGAATCTTGGCTTGTAATAGTAACGCATTAACTTGCGCGATTGCTAATGCGTATTCAGTCCAATCAATTTCTTTTATCTGCGGAATTACGGTTTCTTTT
GCCATGTCTACTTTGAGTTGCGCCATTTCAGCCGCCGTGACTTCGCCGCGCCATTCCAGCCGGTTTTCCCGAATCATCCGAAACAACTCCTGTCCCTTACTAGC
TACTAGATTAAAATATTTTGGTAAGACAACCCGAGATCCATACAAATATAGTGGTTCTGGTAAATATTGGCTTCGTCACATCAAAAACACGGTAAAGAACATAT
TAGCCGAACTGTTTGGTGGTAAGGTTAAGATTATGAAAATGCGTCAGGGTTACAAAGACGCTTGCGACTATCTGAAGCATGACCGAAACAAAGAGTTTATCTCT
GGCGCAGGTTCGGTGGAGTCTTCGAGCGGTATCGTCGTAAACGGCGCGAATGCCAAACTCGTGCAGCTGAGCTCGGTGCCGATCTCGGCGCATAATGTCATTCT
CCGTTGCGCCGCACCTGCTTTCAACGTCATCGCAATCCTCCCGCGTAGCCCAATTCCTCCGCCACCTCGCCAATGGATTCTTCGATGATGTCCATGGCCTTGTG
GGGCTATCTTGAAACCGCTGATAACGCCTTCACAAGGCTCTTCGCCAAATACAAGGGTAATAAAAATGCCAGACTACCAGGTTCTTTTTAACATTGTGGTTGGC
GGCCGGGTCTACGAGCTCCACGACGGCAAACTGCAGACCGTGGTCGCCGCCGATGACCGTCGCTAACTTCATTCTCCGCAGCCTGCGCTTTCACTGGCGCAACC
GGTTTAATTTCACCTGTACGGTGGTCAATAACCCCCACGCTTCCATCAGGTAAATTGACCGGTGAATATGAAGGCGTACCGCCGCTATTTGGAGATGGAATCAT
CACATGATTCAGCATGAAATTATCCTACCATCAACCAAGTAAAACTCAATATTCTACAACGAATTCTTATGACTTTTGTCACTTGTTCAAACAATTTTTCTAAG
GCCGGGCGACTGGCTGATCCGGATCGACGCGGCGCACGGCCGTGCGCACCACCGACAGCATCGTCGCCGGCGGCACCACCGTGCGCACGAGCATGCGCGAGGGT
GATAAAGTCGAGAGAGGGCGTAACTTCTCCAAACTTCAACTTCTATAGGCTCTCGGTGTTTCTGGCGTTACAATTCGAGAATCTGCCAGCCACGTCCGAAGTCC
GATGCTACAGCAACTCAAGGCTCACTGGCTAAGGAAGTCGATGACACTTCATTCAACCTGACCGACAAAGACATCAAGACTGGTATCAAGATTGCTGGCGTATT
TGGGACAGTGCGGCGTCATAGATCAGCTTGAGGGAGTCGCGGGACTCCCAGAAGTGGCCCTCGATGGCCTCGAGCGGCAGCGACGGCTCCGGCGGGCCGAGGAT
AGTTTAGCTTTTTCAATTTCTTTCTCAGCTCTTTCAATTTCCGACTTTACTTTTTTAATTTGCTCTTCTTCAGTAACAAAAGTAGATTTCCCTTCAAAAATAAG
GCCTTTCGAATCTTTGTCGGCAAAGGCTTCTTCAAGACCAGTTTTATTTTTAGTTCCTTTCCGTCGTACACCCGGGTAAGCCGAAAATACGTTGTCGGTAGGGT
CCCCGACAACTGGAATCTTTTGCGGCTGAAATTCAGCATCAGGCACACTAATCCGTCATTTTCCTGTTTGATATAAGTTGACAAATCCCCAAAAATACAATACT
TGCAGACGTTGCCCAGGTAGCCGACGAGGTTCGGGATCGTCTGAACGAGGCGGTACCTGATGTGGACTTTGGCATCCCGGCGCTGGATGGACTGATGGATTTCT
CCCTCCGCAAACATAGAGGCCGAGCAGTCAGTGCTAGGCTCGATGATGATAGACAAGAACGCTTTGCAATATGGCATTGAAAACCTGCAAAACGAAGACTTTAG
AATTTATAATCTGGATTTACGCAAAGGTTGTGTATTTTCAAATCAAGCTCGTCATTTGAATAAAGAAGATATTTTAATGATGTTCTTATTTTTGAATTGTGTTT
CATAGATCTCGCCTTTGAAGTAGCTTTCACGCAATGCATCTACTGGTAATTTAATATGCTCTTTAATAATATCTAAACCCAAACCTGCACGGACATCATTCATC
ACAAGGTGGCGGATGGGTAACGCAAAGCGGCGACCGCGGCTGACATTGTGGGTTCAAAATCCCACCCTTGTTGCCCTACAAATGGCAGACATTAAACTAGAGTG
CAAATACTGTTAATCTTCAAAAATTGAAGCATTTTAAATGCGGGAGTAAAATTTCTTTCATCTTCCAGAAAGCCAATTGCCAAGTTGCTATCCACCGTATCAAG
CCCGACGGTGTATGTGGGGACCGTGGCCCCGTACACCTGGATGTCAATGTCCGCCCCGGCCACCGAAAGTGCCGTCGCGTAGTCGAACTCGCGGGCATACCCCG
CGTTCGTTCACCGCCGTATTAGCAAGATGTTTCCCGCCTGGAGCGATCTCACAGACGCGATTCAAATGATCAAATTCAATCTTGGTCTGGCTGTGCATCACCCG
GACGCGCCGAGAACCTCGACGAGCTGATCGGCTCGGCACGACAGTTCGCCCGGGTCGAGGAGTTCCTCGAGCAGGTGTCGCTCGTCGCCGACACCGACGACCTG
CCTCCCCTGGCTCGAGGCAGAGATCGCAGCGGTGGAGCCGCAGGTTCTCGTTTGTCTCGGCGCCACCGCGGCGCAGGCATTGCTGGGCCGGGAATTCCGGGTTT
GCTTCCACCAACCCTCCAGGCGGGCGTCGGAGGCCTTGCCGATCGCGCCTTCCACAAGCCCGCCCGCCGAGCCGGCCTGAGCCCACCGCCCCGCCGACACGTCG
GGGAAAGAAGGAAAGACTTAGACGCGGAAATACGCAACAACATGATGCCAGCTCCTGATGTGAAAGTGGAAAAGGCAGAAAGTAATGAATACAGATTGTATAAT
CAGGAACTGACGAACATCCGGGGCTGGATCGACCAGTACGAACAGGTCAAGGTGCAGCTCGATCAGATGCGGACGAACGAAGCGACGATCAAGGAGCGGAAGGG
CGTCGTCTCCGTGATCCACAGCTTCGACGTCGGGGCGCCCATGCTCTTGAGAGTGGACACGACGTCCTGCAACATGCTGCCCCACCGTGCCGCCCCATACCCAG
GGGCGGGATGGCAGTCTAGTTATCGCTGCCCAGTATGAGCCACGCTGTACAAGAAAGGCTTGAGGTTGCATGGCCCGCTGAGAAAGAACCCGCACTCCGGGGAC
TAATATTAGAACTTATGTAGTAAATGCATCAGCAACATTTATAAAAAATGAAATAGTATCTATTTCTTTCAATCTTAATCATACCAGTACAGGTCAGGTTCTTT
CATCCCCGTCGGCCACCACGATCGGCTCGAACCCGGCGGCGCGCAGATGGCGGCCGGTCGCCTGGGCGAGCGCCTCGCGGGGCTGCACCACGAGCACGCGCGGG
CAAGCTCGAACCCGTAGCTCTGGTTGGCGAATTACCCAGGCCCTCGTTCTTAGCGATTCACCCAAATCGGAAGTATATGTACGCTGTTTCGGAGTTAGGAACCT
CCCAACTTTCTAGCTTTCACTATTCCCATTTTGGAGCCAGTAAATAAAGAGGCGTAAAAATCTCACACACACACCACTCCCTCTATGTATACTAAGATCTCAAT
GATTACCTTTACCCCGGAAACGTCTCCTGAAGAACACTGGAGATATCCCCCATCTTTTCCTGCCCCATTTTGGAGAGCCGCTTGATCCGCTTCCCGATCAGCTG
GGGTCGCTCGAGCACCTAACCGTTCGATGTATTACGCAATGGGTTACGAAGAAAAGGATTTCGTAAAGCCAATGGTTGGCGTTGCGAATGGTCACTCCACGATT
CAATTGAATCGAATATGATAAACCAAGACCAAGATATTTAGCAGGAATAAAATCATTATTTCTTAATCCAATGGTCATAGCACCCATAAATAACATAATTGTTG
TAACTCATCAAGGTCTTCAACATATTGTCCGAAGTCATCATACTTAAATTCTGGATTATCAGTAGATTTCTTATCACTCTTTTCCTTTAGTTTGGCATAATTCT
GGGGTTATGGGGTATAGAACTCTCATATTATTCTAGAAAATATCGTGAGTGATGACCTCTCCCACAAAAAGTACCCCGACCGAGTTGGCGGGGGTACTAGTGTT
CTCTTGACGGATACAATCTTTCTCCTGAGAACAAAATAGCAACTTCATCTGTAAATAGCGGAAATGACATAATTGCTTCAACTGCAATAGAAAATAAAGGAATT
AGGGTTGCCAGCCAATACAAGGGTATCGGACACCACCGTCTGGGTCAAGAGTGCCGTTCTAACTGTGTCGCTGACGGGAGTCGAACCCGCACGAGCCGAAACTC
GATTGGTGAGTAAATCATTACTGATCGATGGCAAGGAGTTGTTAAGTGCAATGGGAGTGTTGCAATCTGGAGTTTTTGGATCCCACGGTCTTCGCCGTGGGACG
AGCACTTGGTCAGAACATATATATATCCCACAGACCTCTTGGTACCAGTTGTATTTTTTTTTAAATGCCATTCTTCCAGGACCATCTGAAATCCGCCATGATCT
CAATCATTTTTGATCTTTTATGTTTACACGTACGGCAAAGTGTTGGAAAAAAGATGACTTGATTTTTTAAAAAACCGGTCATAGGTGAAATTAAAAATGATTTT
CCATGGAGTTTTGCATTTTCATGTATGCGCCCTGCGTAGTCTGAGCCATTGCCCGCGCCTGTCCGCCGAACTCAACTTGCAATTCGTTGAGATTATCATCTGAG
TTGATACCTCTCTAACTTCGGATACTACAACTGCAAAGAAACGATTGTTCTTTAACTTTTTTGCTGATTTTTGTAATATAGAAATATACCTATCATCAAATTGT
TAGATTCACTAAGTTTAGAAAAATAGATGTCAAAGAATCAATCATGTAATTAAAAGGCTGTAACGACTTTTCTGAAATTCCAATTAATATGTCTTGAATACAAT
ATGAAAGTACAGACTGGCACTCCCTGGCTCATCGCTCAGGCGAATAACGCGATGACCCGTGTCCGGGTCAATCCACTCTCGCGGAGGTTCTTGTGCGGACGCGG
GGCTGAGGAAGAGACAGGAAATGTATCAAAGACGGGAAAGGCGCAGTCTAGAGCGCCCACTAACTCGGAAAGACTGCGGAATGCGGCGATTCGCAAGAAATTGG
CGTTATAACAAACGCTTGAACTGGCATTCCCGGCCTGATCTGATGTTCCTGTAGCATTTTCATGCCTTTTTCTGTAACACGGACCTGAATCTTGTAGAAAGACT
GAACGAGAACAGCGGCGAGGACATGGGGCCAGTCATGGCCAGATTCGATCAGGTGGCCACAGCAACAGGTGCCGCCATGATGATCATTCACCACAACGGCAAAG
TATTCTACATGAGTCCTCTTCCAATGTCAAGAGCTTTCCATCAAAGGCAGCATCGGCAATGTTCCACAATAGATACCGANCTTTTCTCAAATGGAAACGGCAGT
TGATAGAATTATTTTAATTCACATGGACGGGGAAGAAATACCTATCGGTTCAAAAGGTGTTGTTGTTGGTATTAATGGACAACCTAGATTTAGACCTACAGATT
CATCCAACAACAGCGCGTCTACAGGCACAGGCTTCACAGACTTTTCTGACCTGACTTTCGCCAACTCGACCATTACTGCACGTGGCGCACTTATCTATAACACC
CTTAAAGCGTCAGTAATTGCGTTGCCGCCAGTAGTTGTATATACGGGGTCGCCATCGGTGTCCCATACTTCAATTTTAGAGGCTGGTTTAATACTCAAATGTTT
GGAACAATGTGAATATTATATACAAAAACTAAAAGAATTATGAAACATTTGAATTAACACCTGTAGATGGTCGTAAATCATTCTACGGAAAAGCGAGAGTTATT
TCGTCTGACTTAGGCGGAGTAGATTCTTCGGTAGTTGTTGCTTTTGCTTCGTTAATTACATTTGCAGCTACAAGCAATTCGGACACGGCTGTTGCAATGGCCTC
GCGATCAACACCTGGGCCATCTCCAGCTCACCGTCTGCCTTACCTTTCTGCGCCGCCATCTCCGCCACGGGGTCTAGCTGGCACAATTGCCGGTACTCGGATGG
TGTAGGTTCTGTGGCAGCCCGCATCTGGTGCTGAGCCCGACTATGCATGATCACTCGTGTGCAGATTGTGGTGAATGGCAAAATGATGTGCCGCAAGGTTATTC
GGACCGGCCGGCAACAATGGCGTTTTCAATCAGCTTGGACAGGTGGATGTTGCCCAGTCCCATTTTCGGCCGGTATTTCCGGGTCTATGCCCGTTAAATAGAGA
GGCGCGATGAAGGCACCCTCTTGAGGGTATACAAGCTCGATCTCTTTTTTGACCACCCGCAACATACGAATACGCTGTCATATTACCATCGTGATGCCAAGAGG
GGTTCTTTTCCAGTTGCACCAACTCGGGCGACTATTCCACCCAGAGGACAACCCGTCAGAGGTTGTCAACGGATCGACCGGTGAATGGCTGTTCACTGACCAGC
CAGTCACACCAGGTCAAACCTTATACGTCTTTGTTGGCGCGCCAGGCACTAGTAGCAACACGAGTGCGCCGTACTATGGTGGTGGCGCTACTTCAGGCAGTAAT
CACTAAAATTTCCCTTTCCCACGGTATCATATTTTCTAATTCTGTCAAATTGTAGTGGTGGAACTGCATCAAAGAAAAATTAGTTCTATAATAATTTGACAGAC
GTCATAGTAATTTTCACACAAAAGATTGGTTCTTTGTATTGACTTTCTATGATTTTTATATATAATAAATTATATTTACATTTAGGAGATATATCGTGAATTTG
AGTTCGTAAGGTCCGATGTGCATCGCCTGCATCTCAGGTCTTGTCGCCAGTGCATACGCGCTGAGACACGCAACAGGGGGTAGGCAAGGCACACAGGGGATAGG
GCAGCATTTGAAACTCAGAAACAATCAGAATTTGTAACGTTGCAGAACACATGGCAAGTCAAAGAAGACGCCGGGTTCATCATTGACTAATTCTCATATTTTTG
CCTTCGCTGCGTCTTCTGCTTCTTTTTGAGCAACTGCGGCCGCTACGTCAATAGCGTGTTGCGCGTATTCTTCAGCCGTGTATTCAACATCAAAGGATTCACCT
CGATCAAGAGCTTCCCCTTGAAGTCATACGGCGAATCGTTCGTTTCCGCCTAAAAGCCGCGATGAATAAAAAAGTCAAAGGAGATAAAAAATGGATAAACCCAT
CATTTTCTCTTCGCTGCGTGAGTTTGTTCGCGAAGCACAATTGTGGGAGTGGCTGGGCGGTCCACCCGCGGAGGCTATTGCACCAGCCCCTGGTGGCGGTGGCG
GGATGCTAGTAAGGAGTTTTCTAACCTACCGGCTTATCAAGATGTTGATAAAGACACAATGAATCAAATCATCGAGGAAGCCGGTAAGTTCGCTAGCGAAATTG
CTTTCACCAAATGTCGCAACACTTGATCAACAGCATTATTTACTAGAACTTCATGCTTAATTTGATCTTTTTCTGGATTTCCGCCTGATTTTGCGACTTCAAAG
AGCGCGCACCTGGTCGGTGGTCCAGCCTTCGGACTCAGCGTCGGCGAGGTCCCAGCCTTCGGCCACGCCTGCGGGAGGGGTGACGATGCGGACGTTGGGCAGTT
GGGAGGTAGTACCGATTATAGCTGCAACAAACCAGGCGTTGCAACAACGTCAATAAATATGGACAGCCATAATAGAATTATTTCCATATTGGGAGAAGCACACA
AAGATTTGCAGGAAATTGAGGGAATTGCCAGAACAGAAACCTTTATTTCGCTGGAGATGGAGTTCAAGCGGCAGGTGCCGATTAAATAACTCGTGATAATTTGT
AATATGACGGGGCCCTCATACCCTCAGCGCGCATCTTTCTGACCGCATCAGAAATTGGATTACGGCCAGTTCCCTTTGCCGGGGTGTTCCCCCTTGCTGCTCCG
CTCATATTTATTCTTCATCTTCATCATAAAACTCACAATGTTCCATGCAAGCTGGACAAAGATCTATGTCACCTGCATATTCTGAATATGCACCACAACAATCA
AAAATTAATAATAAATTAATTATATGAATAAAAATTATAAGAATAATTTTATTAAATAATTATAAGAATAAGAATATAATAGTAATTTATCTATAAAGAATAAT
CTCATATTTATTCTTCATCTTCATCATAAAACTCACAATGTTCCATGCAAGCTGGACAAAGATCTATGTCACCTGCATATTCTGAATATGCACCACAACAATCA
AGCAATTTTCAGCTACTGATTTATTCTTATACTTTCTCAGGAACTACTTCTTTTCTTCTACAGGTTCTGCTACTTGTTCTACTTGGTGCAGAGGTGTCTGTATC
CTTTGAGTTTTTTCTTGGCTTGGGTGAGGCTTGATTTTTTTGCCTTGATAACCGCTGGCTTGCTCTCCGCTTCCACCACAACTTCCTTCGGTGATTCTTCCTTG
CTTTGCCAGTTTTGCAATGCGCCGTGATAGGTGGCATAGGCGCGTTCCTGTTCGGCCATGATATCGGCCAATTCAGGCGGCATCCCGCCATTGTCCAGCAGCTT
GCCTTTCGAATCTTTGTCGGCAAAGGCTTCTTCAAGACCAGTTTTATTTTTAGTTCCTTTCCGTCGTACACCCGGGTAAGCCGAAAATACGTTGTCGGTAGGGT
TGTGATAATCTTATGCATCTGTGTGCCATCAAAAAAAATAAAAAAAACTTGACTTTGGGTAATAAAATGTAGTATTATTGCAATATCAAAATAATATCTAAAAT
TTGTATATGAAAACGATATAGCAGTTCTAATTGGTATCAACGTCCTGTAAACCAGTTGCCGCATTTGCTGATTTAAAACAGCTTTAAGGTATGCAAAAGCTAAG
AAAGCTAAACGAAATTCTTTGGAAAATCGAAAACGTAGTTATCACCGATGTTCCAGCCGGTGGCGAAGAAAATTTCAAGGTAATCAAAGAAGTAGGCGTTCACG
TCAACTCCAATTTTTTTAAGTCCTGCAGACCAAGCAACTGAAATTGTACCCATGTGCGGAAAAGCAACTTTTATGTTTTTTTCTTTCTTGCCATTTATACTCCT
CCTGTCTTTTCGTCATCTCATCCACGATTATCTTTGCCGCGTCCAGGCGCGCCAGGGCGAATGCCGCCTCACCCGTTTTCCGCACGGTTTCAGGGTCGTCCATC
AGATTGTTCCTCCTGTTGAAGAGCCTGTTGCTCCTGCTGAGCCTGTTGGTGTTGCTCCCCTGTTGCCCCTGAGATGGGTGCCGTTGAAGTACCAGAAGCAGCAG
AATGGCTCTTGCTTGTTCTTTGGCGATACCATTATTGATTGCCCATTCGTATATTTCTTTAGACCAGTTCTTTACCCATAGTTGTCTTGTTTGCCATTCGTCCA
GCGTTGCTGGAGAACCGATTCTCGGACTTCGCGCGCCACACACGGGAAAACTGGCAAACCGAGGAGCCCTGAATGTTCTTAGCCCTTCTTCAAAACCCCGCCGG
GGTACGTGTCTTCAACTCAACCGACGGGGCCGTCAGCGGAATCAGGTTCACAGGCTTGTACTCGATGTGGTTATCACTACCGAACCACAGGGTGTGCTTAAGCC
TGGTGGGTCAGCTGTGAAAAGAACTGAACAGCGGTACGCGGTCTGCTCTCGCCATTCTTCCGGCAGTACGCCGTGATATGCGCTGTAAAGGTCTGGCGATAGGC
CTTACCGTGAAAACATTGCGGATGGCTACATGACTGCTGAATGCCTGTCTTGCGGCAACTTGTGGAGCTTGAAATGAAAGACATACAAACAACTATTTACACAG
GGTTGCAAGGTTGCCAAGGACTACGAGTACGAACAACTTATGAGGGGATTGGAATGACACACATTAACTACGAACTAGAAGCAGACAAGCGCACGTGGTGGCTG
ACCCAACAACATGGATTGCGCGGAGGGCTCTTGAGATTCTCAAGCCGGTGATTGAATACCGACCGCATCGCCAAGATCGGGACAAAACCTCAAGTATGATTATC
AGTGACGCCGTCTGATATTGTGTAATTGCCCTGTTCGAATGGAACACGGATACGGATGTTGCGATCAGGGAACCCACGAACGCTACGAGCATCAACCGTGACAT
TTCATTGTGGAGTTCATTCGATCGCCTTCACCATGTCTTCAACCACCTTCTTAGCGTCACCAAACACCATCATGGTTTTATCCATGTAAAACAGTTCATTGTCC
CATGTAACCGATGAAGTTTTGGTGTCTGTCCTACGGCACAGGGACTTGCTTTCGAAACTGATGGGTACATATATGGAACCGTGGGCGGCACAGTCCGAAAAGAC
GGCCGCCTACGTCGCCGTCACCCTCTCGTACACCATCTGGCTCAAGCACGAACCGGTGATCGACCTCGTCGCCGTCGCTGCCGGGTTCGTGTTCCGGGCCATCG
GTTGTCTGCCCTATGGCTCTACTTCACGGCCATGCGGCGCGGACTCGACCAGACGCAGTACACGCCGGCAGACTTGCGGATAATGGCGAACGTGGAGAGGAAGA
CATAGCCCGCACCCGTCTGCGGATCGTCCACTCCGGCAACCTGTAGACGTGGTGCCAGAGGATGATGGAGCGCGATTCCAGGGGCCGCACAGTGCGCCACGCCG
AGGTCGGTACAGCTAGTTGGTAGTTGCTAGAGCTAGAGATATTTCTAATAGGAAAACTTATCACCATCTACTGTTGGTAGAATGGTATCTTTCTTTGTCTAGGC
AGATGCCGGCGAACATCATGTTGCCGACGAACGCGAAGATGACCGCGTTGGTGTGCAGCGGACGCAGCCGGCTGAAGGTCAGCCAGGGTGTGTCGAAGTTGAGG
GGGTAGTCTGGTTAGCTATCCCGACCATAGCACTGTGCTTACCAACGGATCTTTTGCCGATAGTTCTGGCTGGACGAACCAGAGCACAACGGGTGCCAGCATCT
AACACCGCTGTGAGCAAGTCTCTGACTGGGTTGGACTTGAATAATCCGGCCGATGTGCAGTCTGCTCGCACAATTATCACCGATGCGCTTGAGAGTGAGCGCCT
AGGCACCGAAACCTTCCTCGATCAGTATCTGGAAAAGAAACCCAAACGGAAGCCGCGCGTTGGCGGCAAACCCCGCGAGACTGCCCCTGGCGACGAAGAAAAGT
AGCGCTCATCTCGAAGAACTCATCGGTTTATCAGATCGTCTGATAGTTATGCTCCGCGGATCCGTAACAGCTGAATTAGATCCAGCCAAAACAACTCCTGAATC
AAAGAGTTTCGTGCACCAGCGCAATTGATGCAATGCGACGTACAGCTTCATTGAGTGCAGCACTTGCTCCCGGATCTTCAATGCGACGAGCCTGTAGGCGAAGT
TTTCGCTGGACGCCTCAGCGATTCTTGTCAATCGTGCAACTTCATCAAGTAGTTTCTGATGTGGTCGGAATTTTAACGGCAACGTGATAGTGCGACGTACATAG
ACCGCGTCACTCAGGTCTCGATGCGTGAGCCACGCCGCGATCTGCGACTCGGCGAGCGGGCGTGTCAGACCGTCAGAGCACAACAGGAAGCGATCGCCGGCATG
GAAGTGGAAGCCAACTACAATGGCGAGCAGTAGCAGCCGTGTGCTTCATGCGTTCATGCCGTCAGTGTTTAAATACATGAGCGCACTGCCCAACTTTGACGGCG
AGTACAGTAAATCAAGGAATTTCACAGGCACATTACCGTTCGTATTTGAATGCTGCATATTTTGTGTGTGTGTGTGTGTGTGTGTGTGTGTGTGTGTGTACGTT
TGGCGGCGGTGCCGCAGCCGTCGGCGGCAACGCCGCGCAGCCTAGTGCTGGCAACGGTGGCGCTGGCCGCGCTTCTTCGATAAACGGAACATCGGTAACGCGAG
CCCAGGCTCAATATCGATTCTAGCAGGATAGCTCGAGTGGCGATATTTTCACCGTACCTCAGTATGTAGCCGCATGAGTAATTAGGAATTGCCACAAATCGAGG
CTGCAGCGCCGCTACCAGGAGGCTCAGGCCGCGCAGGAACAGGCGAAGGCCGCCATGGATGCCATCGGATCCGGCGATCTCGCCACGCGTGCGCAGGACGCCAT
GAAACTTACGACACGCTTTATTCTAAGGCGTATAAGTCGATCGATTCACAGTGGACGTTCGACGTAGAAATGCTCGCAGACTGGGGGCGCAGCGGATTCGCTCT
CCCTTGCCTTCCGCGGCACCAGCAGCGTCCAGGGCGCCTCGTCGAACAGGCTCGCGCGGGCGACTTCCATCGTGCCGCCCGGCCAGGACAGGCGCGCGCCGCCG
CTTTTATAATCTTTAATTATTTTCATATTAATATTATTTGATTTTAATATATAGTCTATTCTTTCAAAATCTGTTTCCTTATCAAAATAATATACCCCCTTTTT
CATCAGGGGTCAGTGAGCCTCAAACATCTCGACGGCTACCTCGAGGAGTTTACCTTCCGTTTCAACCGCCGCCGCGCACGCCGGATTAGCCACGGCGCCGAGCG
TGTACCTGATAAAGTGTTCCATGCTTCGGAGGCATTGACCTCGTTCCATGTTTGGAATACTGCCGAGAACTCTATTGAACTGAGATTAAGCGTTAGATATAACT
AACGGATTTCTTCGAAGCTGTTTAAAATGATGTTCGACTATGCAGCGTTTATTCATGACAACGCATAAGCATAGCGCGTCAGAGCCTCGCTACCGTTTACTCAT
TTAATCCAGCTGGCGGAGAGGGAGGGATTCGAACCCTCGGTACCTTGCGGTACACTGCATTTCCAATGCAGCGCGATCGACCACTCTGCCACCTCTCCTTTGTT
TCTTTTCATGAGTTTCTATCCGGGTTGGGCTTTTGCCTGTGGTGAGCATTTCTCCGAAAATAACGTATTCCGTGCCCCAGTTGCAGGCATCCTGTAACAGTTCG
GCCATTTTCGCCTAGATTTTTCGAGAAATAAACGGCCGGGGCCGGCCCGAAAACCTTGAGGTCGGGGTCTCTCGACCTGGAATATCATCCAACAGGGTGATTTC
TCTTTTCATGAGTTTCTATCCGGGTTGGGCTTTTGCCTGTGGTGAGCATTTCTCCGAAAATAACGTATTCCGTGCCCCAGTTGCAGGCATCCTGTAACAGTTCG
CAGGGAATTTTTATTGGGTTATTTACTCGTCTGATACATTAGCCAGGGCTAAAGCTGATCCGCCTATTGAGAGGACTGAGGCGCTAATTGCTAGAATGTGGCCT
GCGTTGCTGGAGAACCGATTCTCGGACTTCGCGCGCCACACACGGGAAAACTGGCAAACCGAGGAGCCCTGAATGTTCTTAGCCCTTCTTCAAAACCCCGCCGG
GAAAAATTCAGGTACTTTGTCGCCGCCAATGTCCATCAGGCGGATGGTGCACTCCTTTTTTCCGTTTTTGCGGAAAATTTTTTCATAATATTCAATCTGAACAG
TGCAGGTCATTGAGCTTTCGCGAGATGTTTTGCATCTGGGCGCGGTGATTGCCAGTCTGGACGGATCAATGAGGGATCGTGTCATTGCGGCGATTTGCGCCGAG
GGCGGGGTTATCTCGCAGCCATGCGCCGATGCCTTCAATCTGATATGGAAGAGCTTCCGTAACGACTTGCATCACAATGCACCCGAAAGTAGCAGCGATTCCTG
GGCAAACCATAGATGTGATAATTGAAATCCTGTAATGAATCAGAATTAGGTGAAATTACATAAAGATCACCAGGAGTTGTTTTGAAATTAGCAATCAATTGTGC
AAATTAAATTATTATTTACCGAATAAATATTTCTTGCTAACCAAGTCATACTTAATTGTAATGTCATAATATGAGGCACACTTAACATGTTAGCTAAAGCTCTA
ATACTGGCAAATAATGGAAGGCTACATGAAGCTGGATCAGCAGGGCAATCTTACCGCGCCAACGAATCAATGACGGCCAAGCAGGGAGCTGATGGCAATATAAA
TCAATCCGAAAGGGAGTATTCAAGTTGCTCTTTATGAAGGCGCTACAAAAGAGGAAAATTCAATTAACTTACTGGGAGGCGAACAATATTTTTATCCAAATTCG
TATCTGGAAAAGAAGAAGTGCTTTCGGCGTGGAAAGTCCTTTTAGCAAAACGAATTTAATATATAATACATACGACGATGGAAGTTACAGGAAAAATTAAAGTT
TACCGCAAGCGCAACACCAGTGCGCCGCATCCGAAGCATCCGGTCTATCCGTACCTTCTGAAGAATCTGACGAATCGACAGGCCGAACCACGTCTGGGCGACCG
GTTCTGGAGGATGGTGAGGCCCTGGCCACGGTGGATCGCTTCGCCGAGAACCTGGCCTGGCTGGCCGAACGCGTTCAGGCGCCAGTCTAGCTTGCTCCCAGCGG
TATCGTGTTGGCCATCATTACGGTTGGCTCGAGCGTGACAATGATATGAAGCTGGCCATTGCCAAAAAGAATGAAGAGTCGCGCAAAACTGAGCAAAAGCTTAC
TGTGGCTAATCTTTCAATGAGTGTAATTCAACATTAAGTAAATTGATTCCCCAAATTACGTACCATTTGCTTAATCTGAATTAAAAAAAACTACATCTTCCATC
AGCTCCAGCCGTTCTACGGCGGCACGTACTTCCCGCCGCGCACGCTGCCCGGGCGGATCGGCCTCGTCGACGTGCTGTCGCGCGTGAGCGATGCATGGCGCGAG
CCTACGCCTGTGGTTTCGACCAGACTTGCGCATAGATAGTGCATCTCGTTTGCGCATCTTCCCACCGCCGAGGCCAATTGCACTCTGAGCGGCGGGCGGATTCG
AGTGCCTACAAATGGTCAGATTCTTGTAGGTAATGGGACAACTGGTAACTTACAACGCCACCGATTTAGGTGTTGGTGACGGTATTGGTAAAACAGTTGGTGCA
GATTCCCAAGTATTCGACTATTATTCGCCATTACCCGCATAAGAAAATGATATTTGCCAGTATTCGCATAACAAAAAAAATTCACCAGTATTCGATAAAATTCG
GCCATGTCTACTTTGAGTTGCGCCATTTCAGCCGCCGTGACTTCGCCGCGCCATTCCAGCCGGTTTTCCCGAATCATCCGAAACAACTCCTGTCCCTTACTAGC
GGGTGGCGCGCACGGCGGCCTCGTCGGCTTGGGCGGCGATGATGGGGGCGAGGCTGGTGGCGAGGTTTTCAAGGCGCTGGCGTACCTCGACCATGGCGGTGGCG
GTGCTATGAATGAACAACTTAGTAGTCGTAGTGCTAGAAGCAAAGTTAGTAGAAATTAATTCCAAAAGATTAATTTAATATTAAAATATACGATGAAATTTTTT
GTAAAGAAAAATTTACACTTCATTATAATTTTCCTCCTTTTGCCACAGGCGAAGCCAAGGCTGCCCGCGGAACAAGCAGAAGGGAAGTTGGTCACGGGAATCTT
GGTCTGCAATTTCTTTTTCGTAATCTTCAACAGTCTTGACATGTCTGTCAATAGAAGATTCAAGAACTGACTGGACTACTTCATGCTCCTGCATTCACTTTCTT
CCTGATGGATCTCGATGTGGGATTGGTCAATTGATGGATGAAGGTGAGTATCGAAAAGAATTTGAGGGATTCGGTCTGACCGACTGTTTTTCTGCAACAGATTG
GTGTTATTTGATATTATTTGTGCTAACATAAAATAATGTTAAAACCTGAAAGACTTGAGAAATTACTGGCAATTAGTCGGAATCGATACCAGTTGCAGATCACT
CCTCATCAATAATTAAAACGACATATATCATGGTAAACAACATTAAAGGATTACAGGTAGTAAATTGGATAGGAAAGAAAAAGGTAACTCTTCCAGGCCATAGT
TTTCGTCGGCCAAGCTTTGCTCTTCGGGGCCTTCTGCAGACAGAGATCCGAACTGTGATTTTGTTGCCATGCTTGACTTCTTAATCGGTTGGCCCACTAAGCTG
AATAATACGTGAAAGCTGGAAAAGAGCTCAGGACACCAGAAATCATAACCGGTTTTGCCTGCCGATCCGAATACGGCTGAATTGTATGCCATGGTCAAGCCGGT
GGGATTCAAATAAATGCGGTGGAGTGCCTTGCTCAACAATCTGCCCTGCATACATCATTTCAATGCGGGTGAGCGACTTGTGCAATGAGTGCTAAATCATGATT
TCTGTATCGGCAGCTCGAGATAGTCGATCGGACTGGCCGGACTCGCCCAGTGCAGCACGTAATGCACTGGTCCTTCGACGTCGATGTACTGCGTGACGTCGTGG
GGCAAGAACTGCAACAGGAAACAACCATAGTGAGAGGCTCTGCGGGAAGACACTCACAGTAAGAAGAGAAGCGGTATACGCACCCACTGCCATAAAGCCAGCAT
CGCACACGAAGAATTGATGAATGAAATGCAGATAGGTCAAAATGATTTACCTTCTGAAATAAAAAACAAATAATTTCTTTTAATCGTAAAAGAAGGATGGCTTT
CAAGGACTGGAGTCGGCAGCAGTCCTGTTGGCCGCGGCCGGCGCCCTCTTCCTGGTCACGCTCGGGCGAGCACTGCTGGCGACCCCCGCCGTAGGAGTCACGGT
TGTACCTGATAAAGTGTTCCATGCTTCGGAGGCATTGACCTCGTTCCATGTTTGGAATACTGCCGAGAACTCTATTGAACTGAGATTAAGCGTTAGATATAACT
CTTCCCGGAAGTGGTCATACTCTCCAGGCAGTCTGTGCTTCAAGTGGATGGTGAGGAGGTGGAAGAGCTGGGGAAAGAAGGTCACGCTGGCTATGGCCTTCGGC
TGTTGACATTTAATGACACCTTGGTGATACTTTGGAGTCATATAGTAGAAGACCAGTCTTAACTCATGTTTAATATTAATTAATTAATTAATTAGTAAGGTCCT
TGAGCGAATGCTATTGCGACTATGGAGAACAAGCAACCATTTACCGTGCTGTGTTCCGCAAAGCTCGCGTGCAGCATAAATGCTATGAGTGCTCTAAGGCAATC
CTGGGTTTTGAGGTTGATATTGGTTTGGTTGATGAATGGTTTAGAACAAACCTAAAACCTTGATGCCTAAAACTCTTGGTGCTTTGTTTTTCAATAACTTTTTG
TCTGACTCATGCAGCGCCGGTTTGTGGGGCTGCAATATTACTTCCTCCAAGCCTACCTTCAAGTTCTTCCTATTACCCAGAACCTCTTCACCATCTACTATACT
GTACAAGAAAGATTAACAGAACAAGTATTTTCACGCGTTATCATATATTTTAGGCACTAACAATATTGCAGTAGTAATTGATGCAAAACATTATTGCGTTGCTG
AAAGGCAAATCTAAATGCAAGCGACGACAAAATGTGTGTGGCAGCGTAAGCAAAGTTCAAACTAATTTAAAATCAAAAAAAGAAATGCCTTCACAAAACATGGC
GACAATTTGTTGTGCAGTTTGAGTACCATTAGGAGCAATATTAGCTGTAGTTGTAATTGTTAAGTTTCCTTTACTCCATGCACCATTATCAAACTGCTCACTAT
TTGTTCCAGTCTTGCGTGCCGTGACGAGCACGCGCGACTCGAGCGAGCCGACGGCCTCGTTGTACGCGCCCACCGCGGTGTCGAGATTGCGGCCGACTTTGGCG
AGTCGGGTAAATAGTCGGTTTCGGCGGTGGCGTTTAAAAATACGGTTCTGCCCCTGCTAATAATGCCGCGCCTTCGTAAATTTGATAAAACGGGTTGGGGCATG
GCGGCGCAACTGATGGTGATGCTGCGGCTGAATCGAACGCCAACCGAGTGGACGCCGGAAAAGCAGCGTGACTTTGAGCGATGGTGTGAGGAACACGAAATGAT
CCGGTCCAGCTTTGCGCCCATATTGGCGAGAGAGGATGCAAAGCGGTACATGGCGGCAGTAGTCCAGCCCCCCGGCCTTTCATCTTGGCCGTGAACTGCTCCAT
AGCCGTTTTATCCTCAACCACGTCTAATAGACCAATCTGCACTAAATTGCTAGTGTAGGGCTCTAAAATAGGTATAACTGCTGACGCTTCGGCGGTGAAGACTT
TATGTTTTTATAATCTGCCATTACCACAATATTTTATCAGCATAATACCCATTTGAACCAACTTTATGTCGGTCTTTTTCTATGCCTTTCTTTATACAACTTTC
GCGTGGCCGGCGACGTCGATCGTGAGGTCGCCGATGGACAGGGCCTCCTGGGTGGGGTCCTGGGACGGACGCAGCCGCGCACGGACCCGCGCCACCAGCTCCTT
ACACACACACACACACACACACATACACACACAGACACACAGACACACAGACACACACACACACACGCACAAACATACAGCCCGGAAGATGCTTGTACGTGTTT
TGGGGAAACTGTAACTAATATTAAAGATATAGTTGGTATGAGAGGATTCCTTATAGGATCAGCTTTTACTGGACTTACCGGCAGAAGAGATCTTATGGATTATG
ATCTCAATACCAACACATCTCAATACCAACATATCTAAATACCAACACATCTCTTTACTGGCACATGTCAATAAAAACACATCTCAATAACACCACAACTCTAT
GGTAGATGACCGAGCAGTCCACAAGGTCCTGCGTCGCCGAGCGGGCCGATAGGCTCACCGCCAGCGAGGACGCGCCGTGCGAGACGGACACCTCGTCGACGTAG
TCCAGAAATTTTTTTCTGATTTTCATCCCGAAAATATTCCTCATTTCCATTCCGAAATTTTCGCGCACTTCCATAAGTTTGCCTTAATTCGAAATGTTTTTCTG
ACTTCGCTTCCGAAATAGACGCTATTACATCATATGAACTCGCGTCCCATAATTCGAGTTGTTCAGTATTCAATTTGACTAACTTACGGTGCTTACGGGCGACT
AACGAAATTAACGTAATTCTTGCTGCTCTAGGTCAAGCGCCTTATGCACAAGTAGCTGAGTTATTCGAAAAGATAAAAGTGCAAGCTACTCCGCAGGTAGAAGC
TATTCAAAACCATTACCCAAAACGGCTACTTGGCGGTTCTGTTGCTTGTTGTGCCAGTTAGTTGTAACGGCTTCGGCATCAGCTGCGTTTAGCATCGCGTTAGT
ATTGGCAAAGACATTGCTGTAGCTGAATTCCGTGAACTATATCCTAAGGTGCGTAGTGTGCCTTATGTAGTTACCGAATAAGCAATAAAAAAAGCCCCCAAGGA
TCAACTGTTAAGTTCCAGAAGTCTCTCGCCCACTTCCCACGTGCTGCGGCTGCTGCTGTGCGAGCGTGATCTAACTGTCGACCTAAGGCTTCAATCTCATAACC
CATGGCGCGGGCTAACGGTGGCAGCGGCATCATCGTCAAGGCGCGGCTGATAACAAATCAGAGCACGAACACGGCGCAGTACCGTCTGCACCTGTTCCATACCG
CAAACCTGCTCAGTATCCGGATCTTTTAAAACATATATAAACATTTTAATTACAATTCTCTGGCTGCGTTACGGTGCAAGCGAAAATATATTTACCGGCGGAAC
CGTGCGCGCCTCTCCCAGCTCGACTGGGACTACCTGCTGCTCGCCGACGCGGATATGGAGCTCAAGGTCCACAAGCAGCCGTGGCTCAATGGCGAAAAGGGGTT
GACATCAGCGCGGTACGCACCGCACTTCTCGCATTCAAAATCCGCCGTCCCGACGTAAGACTTGCGCATCTTTAAATTTGTTGCGCGGATTAAAACCCAGTCCC
GATACCATGGCCACATTGGCCGGGTCGACCGCTTTTAGTATCATTCCATCTCCTGATATAGAGAACTTGGCCTCATCCACCAGGGATGACACGGCCCCGAGAGC
GAAAATGAGTGCCGCATATTGGGCAGATAAGGTGAAATGGTAATGGCAATAGATAAGAGCACTTGGAACAAGAGCGTTAAGGTTTCCCAGTCAACAATTGATGAC
CGTCCACCCCTTGAGTCCGCGCCTGTTCCCTCTCGCTAAAGCGAGATATGCCCCAACTAACACAGTCCTCCGCCCTGCTACTCGGCACCCGCTGAGGCATCTTGT
TAAGCGGACAATCCGAAGTTCGACAGCCCCTTCGGGCGTGACGGTGAATCCCCGCCGCCGCCACCAGAAGCGCCGTTCTGTCCGCTGTTCTGGTAGCCGCCACCG
AATCCATTGTTGACTGAATTCCTGGTTATTGAGATAGAAAATATAATGCAGAGCTGACTCTGGGGGAATTCATCGGGAACAAATAAGGTTCACAATAAAAATATT
CATTGCCTCGACCCACAACCTCAGCATGGTGGCCGAGCTCGGCTCGCGCGTGCTGCTCCTGCCGCCGCGTGCTTCCGGTCTGCTCGCCTCTGGCCTGCTCTATGA
GATGCAAGGGAAAATGCATGTTGGGTGCCTGGAACCGATCATGCCTCTATTGCTACTGAAGCAAAAGTCGTTGAAAAACTACGCAAAGAAGGAATTTCGAAAGAT
GGGATTCAGATTAAAGGTCAGCATGCCCTGAATATCATAGAAGCTTGCACTGCTTTTCTGAAGCTGAAGATTATTAAGTTGTTTGAGTATCCAGTCAGAGTAGGT
CCACACCGCCTAACGCATTAGACCAAGCATTAGCGCTACCAATGTAGCCTGATGCGCGAGCATTAGCGCCTTGATAGGCGTTTTCAGCTGCATTTTGCCCATACT
ACAAATACATCAGTATTAGAAATTACTGATGGTGAAGCGGGAGCTCAGAGTAACTGTTTAACTAATTTAAACCAAATAATTTATACCCAATTTACCGTACCAAGT
TTCCTGCGGTACAGGTACTTGATACTCTGCTGACAAATCTTCAGCCAGCAGGAAGGTAAGCATTTTTTCCCAGCCCGGAGGCAGTGAAACAGTTGTAGTCAAAGC
GCGGATTGGTACAACCTTTAAACGGTAAACAAGCCGCATTAGGTTAGCGGCACAAACATTAAGACTGTACGGCGGCGTAAGTCTATTAGGCTCGAGGCGCTGGAC
AGTCTGGGGCTGAGCCCCAGTGAGTTCATGGCCTTCTGCTACCTGGTCCAGCAGGGTGGCCGGGTGACCGGCGCCGACACCGGCCAGGTGATGGGCGTTTCCGAG
CTTCGATCGTGCCGGGCAGGCCCTGGTAGTTGAAGGGGATGGTGTGCATTTGCGTTTCTCCGTTTGGTTGGCGATGAGAAATTGTAGCAGATGCTAAAACTCAGG
GCATAAAAACAGCGATGGAGATGAATAAGCGATATAGACCATACTTAGAAGAAGCCGGATATAAACCTAAATATGCTCAGCGTCTTACCAGTGGAGAATTAACCG
CGAGGTCCGCAACGGCGTCTTGCGCATGTTCCTCCCGCCGCTGCGCTACGTCGAAGACTATCTCGAGCTGGTCTACGCGATCGAAGACACCGCGGCCGCGCTGCG
GATCATTGACGAGAAGATGGTGGAACAGTCTAAAGGAGGGTCCTGAAAACATCCTATGGAATATTGAATATACCGACAAGGATACGAGGAACTCTTTCCTGGAGG
CTTTCTTCTGAGGAGTGGAAAGCGAGGAATTGAACTTGATAGTGGAGGCCTCAGAAGGGTATCTAGGCTGCGGCCCACTTGACTTCTCTGCCACCTTCCCCGCTT
GAATCCATCCACTCAAAGTCATCACCCCCATTGCCGATAGCGGTCCCCGCCCCGAGAATGGTTACCTTGTTGTTCGCGCCGTTGATGATCGCAATCCCGATTTTT
TACTAGATATAGGCTCACGCAAGTGTAGAGAGGTGGGGATGTACCACACTAAAGACTTGAACAATCCTTGGTTAATGGAGCCGTTCTTTTCATCAAGTTATAGTC
CATTGGCCTGCTCGCAGTGTGGACAATTAGGGCGGTGCTTTAAATACCCACCCCTATCTCTGTCCATCTCCTCGCCAACATCTAAATACCCATTATGCAATGGGT
GTCGCAGATCTACCGCCAGCGGCGAAAATTCCTCCCTAAGCATCGCTGCGAGTACAGTAGAAAACATGGCTTGCCGCGTCTGCCGATGTTTGCTCCTGTTCTCCG
GTGATCAACTGTCCCTGCTAACTTCCATTCCCATGTCTGATCCTCCTCCACTGACATCTTCTTGTGATCTCCTCTACCAGCTTGACGTTGGAGTGGCGCTCTCCT
CATCGTCGACCACAAGCTGCGGGCCTTTGCCGTCCGGATGCGAGAGCGCGCGGGAGGTGCACCACCAGTAATCTTCCAGTGATTCGCCTTTCCACGCGAAAACCG
TGACCGATTCTATGCCGTTTAGAACAGCCTGGGTGTCTTTTGGCCGTTTTACTATCAATATCGGGTCAATCCCTAAGTTTTCTGCCGTTTCCTTGCGGGATAACG
GGACCTTTTGAAAAAGAATTGCGCGAGTACGGCGCTTGGGACGAAGACGAACTCAATCACCATGAGAAAAATTTACAACGGATTTTATGGATAGCAGCAGGCGAT
CATGGTCCGATGTGCCATTCGTTCTGATGGGCATGCTCGTTGGTGGAATCCCAATTTTCGCGACCGCCTACATCCTTCGAACTGGCGGCTCGAAGAGAGCGGCTG
GGCGGTAATGCTGCTAACTTAGCTACGGTACTAACAAAACTGTCTACAAATCAGCAAAATGCTCGTGAAGGTAGTGACCAATTACGTGATTCATTTAGAAGTATT
GCTCGACGCCGAAACCGAACCGATCACCCGGCGCCGCTACGTCATCGAACCGGCCCGCACCCGCCTCGACCTCGACGAGCTGGTCGCCGCGATCGGCCGGCCCCG
GAGGCTTCCGATATGTTCCGGGTTCCGCGCTCCTGAGTGCGGACTATGGAGCGCCGCATCCCATTGCAGATCCGATGGGATCACCGGGTCCTGTGCTGACATTCT
AGGTTTTCCAGATTATTTTTCTTTTGCAACTACTGCTTCTGGTTTTTCTAGTGTAACTAATGCTTTATTTTACTACAAACTTATTGGTGGTGCTTTATTTTTACT
TATGGAAGTTGATGGCTACGAAGCTGTAATTCATGAAAGCGGGCTTATTCCAAGAGAAACTTTTCGTGTTGGTGATCGAATCAGATGTTACATTGAAGATGTTCG
CATTGAATGCTGCCTCCTTTTCATTATCTGAAACTACTGTATCTGGTAAGTGTAGTGGCTTATCTATTGATAAAGACATTACGGATAGTGCAGTCTTCCGTACAG
TACACTCCAATCGAAGGTATAGGTTACTTCATTTGAGGTTAGAGCGTTCGTCTTTGTTCCGTATAGACTGTTAAACACAACGGTATAAATGCTTTCCTTGTCCTT
TTGCTCAACGTACCGTTAGCCCACGGTGAACGACGGCCTTTCGGATCGTTCCACATCAGAATCTCACCGGACCGGTTCGCGCCGTCCGTCGCTGAGACACCGATG
GCTCCTTTCGACCACCCCCGTTCCGAGGCAGGAGTTTTTCGCCATGCAACGATCGCAACGCACTGTCGCTGGTCAAAAGGTTTGCCGGTTTTGCCCTGGTTTCCC
TGAGCGCGAGTTGAAGGCGATATGTAGCTGTAGACATCATCGAAGGGATAACTGATGCGCTAGGCAATTGGTTAGCAGTCGATTGATTAGCTGAACCTGAGTTGT
GTCGAGAATCAAAGAAGCGGCGCAGGATTTCCATTCATCCTCTTCTTCGGGAATGTGCTGTTCAAAGCGGTGCTGCACATCAAAACCCCGGCAGACCATGTGTTC
TGTTTTGTTGATGTGTTGCCAGCTCCAAATTTTCAAGACGGTTATCTTGCCTATCAAGGTTTTTATGATTAATTTCAAAACCTTTTGGTATTTGACCGTTAAAAG
TACTAGAGCGGGTTAACAGACACAAAAGACCGGAAATTACAGATGACTAGAGAACAAATTATGCAACTAGCTCAACAAGCTTGGGGGCGTGGCCATGAAATATTT
CAGTATCTTTTGCAAATTCCAGGTTATTATCATAAAGCCTATCGCCGTAACCCTCATTGTATCTCTTAAAATAGTTTTCATTGTAAAAGTCCGCATCTTGTTTGT
CTTGCGACAGTAAAGCGAAACCTTGCCGCCGCCGACCCGCGAACCTATCTCGGCAACGAGGAGCTGATGAGCCAGATTGGCCCGGAAGCCCTGATGGCAAACTTC
CAGGACCTGCATTTATGCCAGTAATGGAAAGCAAGAACATCCTTACTGACCTATCTAAGCGTGGATGGGACCTGGTTAGGTGAGTCAAACGCACGTTTCTCACGT
ACAATTAGATAGCAACACTTCATCATCAATATTCACAGTCACAAATGCTGGAAGTGGCTCATACACAGGATCATTCTCAGTATTAGGAGGAATAACAGGAAGTTT
GTGGATGCGGCACTCGCCGTCGGAACACCCTGCGGGCTTCGGTGTGATGGCGGTCACGACCGGGCTCGTCTTCTTCGATTTTGCGTATTTCCGCGAGCAGATGTG
ACCAAGATGCGACTTGCAAGCCTGCCGAGAGTGCCGTTGGCAGGCATACAGGCTTTGTCGGTGAACGCTCGGTCGGTTCGTCCTCTTCTTCCTCGAAGTCGTCAT
GAAACAGATCTGAGGCTCAACCGTACCAGAAGAGTTGAGGTAAAATTAGTTAGTAAAGTAAACAATGTTTTTAAAAGCGAGAGTTTTATAACTTGTCGCTTAAAC
GACTCGGTGAGTTCTCCGGCTGGATCATCGACAACAAGAAGGCCATCAAGGAATGGGCCCCGGTAATTCTGAAACTCGCCGCGGTGCTCGCTGCCGCGAAGATCG
GTATGTAGAGAGAAGCTCATCTGCTGCTTCGTAGTCAAAATCTTTATCAGCTTGCACAGTAGAGTTGGGTTCTCACCTTAGATTTTTGCCACCCAATCTTGAAAA
GTAGGTGGTTACGATGATAGTTCAGTATGGTCGTTAAATGTTGTTTATAATGTTAATGACATTGTAACATTTGGAAGTTATACATATAAATGCAACACTGCTCAT
CAACCCACCGGACTTGAGCCGCGTTCCTGACGAGTACTGGAAAAAAGGTTGGAAGTTGATCGCGAAGCACGTTGAGCCGGTACTGGTTGAATATTTTGTGCAAGT
CGAGTCGAGCACGGCTTCGAGCTCCCGGTCGGCCCGTTCCGTGCCGGTCAGGCGTGCGAGCACCCGGCGCGCCGCCGGCAATTGGTTGTGCATCGCAAGCCAGCG
CGAGTCGAGCACGGCTTCGAGCTCCCGGTCGGCCCGTTCCGTGCCGGTCAGGCGTGCGAGCACCCGGCGCGCCGCCGGCAATTGGTTGTGCATCGCAAGCCAGCG
GTTGTTTTGTATTCTATCAAAAGAAAGAGCTTTTATTATTTTCAAGTCAAACCAAATATAGAAGACTTACTTTCTGTGCAGCCTCATTCTTACTTAGAGTTAATG
GGCCTCCCGTTTCATCGGTTGACCCGAAGGGAAACCAATACAATGTCATCCACAACATTTTTATGTAAATCAACTAAATCATAATTTTCCTCACTCATGTTTCCG
ACCCTTGCATCAATGCAACAATATATTATTATCAACTTGCAATCAATCTGAGCGTTGACAAGATACAAGATACAACACATCATCGTCAGAGAAACGTCGGCTGAG
AAGCCAATTTACGACGACCTTCAATCATAAATCATCAATCGTAAATCATAAATTCAGTACGCCGCTTGCGCTCCCTTGATCGACCGTTTCCGCATCCACGGCATC
AATTTATTATTTTTTTCAACCACCGATACATGGCTAACGCCGACACACCACAACCACCATTATTTATATTTTAATGGTACTTAGAAAATTACAACATCATTGATC
CTGCAGAAACTCCAGCCATAGCCAGAGTCTTTGGATCTGTGATACCTGCTAGGTACAGCGCTAGCACTGAGGCTACTGCTGCACGTAGGTATGTTGCGAGTACTG
AATGACAACAAAGGCTACAATGACAATGATGACAACAATAAAAAAGATATCAACGGCAATGACGACAATGAAAACAACACCAACATCAACACCAACACCAGCACC
GATACTATAGTGACAGATTTCTTGACAAAAGTAATATACTAGCAGATCTATGGATTAACTATAGGGGGCGACGAGCAGTTCGATGGTTATTTGTATAACAACTAG
CATCGCGACGAACAGCTACGGAGTCGTGCGCTACGACGGCAACCACGATCGCTACCACGGTAGCGGCGTCGGCCACGCTTGACCAGAACTGCGTCGACACGCCAG
CCTGTCTTTTTCGTCATCTCATCCACGATTATCTTTGCCGCGTCCAGGCGCGCCAGGGCGAATGCCGCCTCACCCGTTTTCCGCACGGTTTCAGGGTCGTCCATC
ACCTACGGAAAGTCCGTTTCAGTCGGCGGCAAACGAATTGATCCTGCGGACTTCTATGTCGAGCCTGTGAAGCAGGAGCCGGTGGCTTGGGTAAACGCAGAACGC
GTTTTTAACTTTGCTGCGCTCTTCCGCGACATTATTGTACGCCGTTTCGGGATCTTTCCTATCCTAAACCTATTCGGTCCAAAGGGCGCCGGTAAAACGGCTTGT
AATGACAACAAAGGCTACAATGACAATGATGACAACAATAAAAAAGATATCAACGGCAATGACGACAATGAAAACAACACCAACATCAACACCAACACCAGCACC
TGTTGCGATTAAGCCCCCTAGCAATAGGGTTTAGTTTAAGGTTAGGGACAAATACCACCAACTGCTATCCTGTCGACAAAATGCAAAAAGTACCAGATTTTTATG
GGCGAACCGATCACGCAAACGCTGCCTGATTGGCACGTCAATGTGCGCTGCGGTGACTTGACCGAAGAACAGGCGGCAATCATCGCGCCGTTCGAACTGGTCCCG
TTAAATACGTTATCTTAGATAATGGTCCTAACAGTTAAGAAAACATTAGGAGAAATACAATGAAAAGCAAAGATTATTCAAACGAGTTTTATGTAGACAACAACG
AAGTGGAAAACGCAAACTTGAACAAGGTATAGAAAACTATAAATATTTCTTTGGTGATGATCAAGTTGATTTAAACCAGTATGTAATGAGGGGAATACTATAATT
TCACCGGTCAGGATGATTTTGCGACTCTCCCGAGATTGCCGCAGAAAAAACAGGGTCGCGCTCGATCCGCTGGATTATGTAGTTGGCCTGTTCGTATTCCGAGTT
GCTCTAACTAAATTAGGAACAATTTCTAATAACACCGTAGTTTCAAATATCTCAGGAAGTACTGCTTCACCTAGCGCAAATGCAATTGATACTTTTGCAAAAACT
TGTCGTCGGATCGATTGGTTCAATATCTTCCTGGGCCCAAACAAATTCGACGGGCCAAAGGTCTTTAAAATCAGCAGGGCCGAGGCCCCCCGGCCGGGGACGGTA
CTTCGGATTCTTCTATTTGTTTTCTTCTTTTTTTCTTAGGTGTAGATTTCTTTTTAGGAGACGAAGATTTTTTAGGTACTCCACCAAATACAGATGAACTACTAG
CAAGCCGAAGCCGTAATTGCGGATATGAATATACCTGGCAATACGGTTCCAGTGCTTCCAAATGTCTGTGTAGCGGCAGCAGTAGTTCCGACCTGTGCGTGAATT
TGAGAATCAAAGGAACCCCGATGGATTCAAGCTCAGGAATCAGCGACCCCGACGGGCCACCAGGGTCCAAACCGATGCCGAGGGCACCATGCCGCTGCACAAGTT
ATTTGAAAGTATGTATACGCAGTACATTCAATATGAGAGTACTAAACTCTAAGTATGGTGTACAAGAGTACGTCGTTGCTAGAGCTAGAAAGGATAAGATGGCTG
CTCTTCGGGCGGTTCATATTCTTCTTTGCAGTCCACGCAAATCTTTCTGACAAGTCTTTGCGCCAGTATGGCATTAACGGTGGAAGCGAGTAAGAAATTTTCGAC
AAACTGGTGGGGCAATTGGTGTAGTCGCTGACGTATCAGCTGCAGTAGATACGGGGCTTAGCGTGGGTGGTTCAGGAACGGTTAATACCTACTCAGGCGCTCCGT
GGCATTTCGTATCCTGCTGCTTCATACTTACGAGCAATCATTTGCATCGCAGAGTCATCAAAGCGAGCGCACTGATCAAATTGCATATCGCTAAGAATTAGAAGC
AAGTAGAATGGAGGAAATTAAAGCGGGTTCAATTGCTAACCAATAACAAGGAATAAAGCAAGTCATATAAAAACTATTTAGAATCTGTCCCGATTCTACCAATGC
CTTTCGATGGCGTCTCCATCGCCACCAGATACAGGTTCACCGAGCGTTGCGCGCTGGCCTGCCGGGTCGCAAGCGTGTAGCTTGGACCCACGAACGGAATACTCG
TCACTTAATCCTTGCCATGATGGTGTAGGGTGGGTGTAAACAGGGATTACTTTTCCACCATGATTACTCCAACTTTCAGCGTGTTCTTTTGTTCTTGTAAATACT
GATCTTATTAAAGATATTATTGGCGGTGAAACTACAGATACCACAACTGGCGGTAGCGGCAATGATGCTATTGATACTGGAGAAGGAGAAACAAAATCAGAAGAC
AGCCGTTACTGACAAAGAAGTCGGCGCAGATTGCGTTGGGATTTTATCTGATTGACGCGAGCCAGCAACAGAATAGTTTGCCACTGCATCATCTTGACCAAAAGC
GGTGCATGATGTCGCCGAAGAAACCTCTGGCGAGTCGACCATCGTAACCTACCAAATCTGCCCGGGCACAATCAACAACCTGATGCCACAGGTCTACAACGAGAC
AATAGGTTCTCTCTTGAGATGAAAAGAAACTTGGACGCAAACTAGAAAAAAAAATTCTTCTTGTATAAAATTATTTGTTTTTTGCCGCTGAAAATTTAAGATGAC
TACAAAAAACGAATTTACGTAACAATGCATTTAATTTTATGTGTTATTTTAATACTTTTACATAGGTGGTTAAAAATGTAACTTATATCTATCCTTTTTTCTTTT
TACGGTCATCAGGATATTTTTTAAAATTTCTGCAACCTTTATTTTATTTTGGCTCATTAAATTCAAAACTCATAGTAAAATTATTTAACTTTTTGCCAAATAGCT
GTAGAACCAAATAACTTCGTTGAACTGCGCGTTACTCCCTAGAGAAAAAGATCTGGCTTTTGCGTGCGGTTAATATTGGTAAACACGTACTGTCTCAATGTGCAT
AAGCGACTCGGTCGCAGCCTCCTGCCGGCGATCCAGCCGCTGACGATGGCCAGCGCCAGCATCCAGGCCTTGATGTTGACGAACTGCAGTGCGGCGCCCTGCCAG
GGCTGAGGAAGAGACAGGAAATGTATCAAAGACGGGAAAAGGCGCAGTCTAGAGCGCCCACTAACTCGGAAAGACTGCGGAATGCGGCGATTCGCAAGAAATTGG
GAGGCTATTTGGCTTGCTTGGGATCCTTGGACCATCATTGCAAAGCTGCTTAAATGCCAGCGCAGACGGTGGAAACTTAGCGTCCATGTGATTGAGGGCATAGTC
ACCAATAATTGCGAGAAACAAAAGTGTTTGGAGTAAAAAACATCCAGACTAACCAGAGAATTATCCTTATTCTTCCAATCAGAACTTGCACTATTAACTGTTGCT
TGACGATCTCATTATCCAGCCGAAGACAACCCCCTGACCAAGGATTCCGCCATGAAACAATGTCTGCTGAGTTCAACAGTGCTTCAATTTGTCTGCGTAAGTCCT
ATCTTGACCCTCCCATCTGGATTGACGAGTCCTGTTAAAATCCATGACACATGACATGTCAACCCCTGAAGGAGAAAATGTGCTTGAACCCTTCAATTTATAGAC
ATCGAAATCACCAATTGTAATTCACTCTAACGAGCGAGAGCATCTCGCATCACTGCTGCGGCAGATCGGACGCTGGCCCACCCAAAGCGCCTGCGGTTCCCCTGG
GAGAACCTTGTCGCACAGTTCGTCAGCACTGGAGGCGTGGTACCCGATCTCCTGGTGGTAGTAGACGCTCTCCAGCGTCGACTTGCGCGGACCTCCACGCTCGAT
CAACGAGTTGGCCCAGGGCCCCGGTCCCATGCGCGGCGTCGCCCGCTGGGGCGAGCTCACCATCGGCGAGACCTTCTCGCCCGACAACGACCAGTACAAGGGCCG
TCTAACTTGTTTGCGCTTGCTATAAACTTGTTTTGTCCCTCAAGTAAATTCAAGGCATCAGCCATTTTCCGTGCATCGTCAACCAAGTCGTTGGTAAGGAATGGG
AACTCCCACTCGTAAAGAAGAGCGCAATCTAGAACGCTCCAAGCTACGTGCAAAGCGCTACCAAGAAAAGATTGCACCAAAGGCAAAGACAACTTCACGTGCCGA
GCTGCCGCCAACACAATCGAAGCCCTGCGAGCTGAGAATGCGCGGATAAAGGAGGCGTTGAAGCCTTTTGCTGAACTTGCCGAATACTATGACGTAGAGCCCGAT
GATGGCCTGACGACCACCACCAAACGCGCCGGACTTAGTCAACGCACCCAGACCTGACTGGGCGTTAATCTGAGCTTGGCGACGCATCTCTTCCATCTGGGGCTG
TCATTAAAATATGAAGTTTGAACGGATAAAGGGGATTTGCCACAACCAACGTTTAATACTGTTTTAGTATTCATAATAATCCTTTCAATAATTCATTAGCTCTTT
TTTTCAAAACATGTATCATCGCATCAAAGCGTTGCTCATCGACCAAAGTAACTCTATCGTCACCTGTTCGACGTTTTAAATATAAATTTAAAACAGAGTTATCCG
ATGCTCCTACTCAGCTATGATGCCCACCCTCCTCTTTCCAATAGGGTGCAAGAAACAGGCTAACACTGAGCTCCATTTGTATATATATATATATATATATATATA
TTTCCCTTTAGCTGCACCCAGCCGCTATCCGACACAACATTCGACTGAGAGCTGACGGCCTGCGTAAAGATGACAGTCTCACCGTTATACGCACGCAGTCCAACG
CCTTCTGTCATCTTGGTTTAGTAATCTATCGACAAAATAAAAATGTTCTCTTGCAGTTAGAAGAACTAAATTTGATTTTTCATTAGTGCCTCCTAAACTTTTTGG
GAGCGAGCAGTTGACTCTTTGATGGAGGAGTCTGCCATGAAGTTCGCAAGTTCGTAAAAGTACGATAGTATCTCTCTAGATGAGTCGCCAGTAACCTGCTGAATT
CAGTATTTTTTATTGGGCACACAATCGTAAGATTACTTACGAATACACAGGTGATCAATTAGATACACAACCGTACTGTACAATTTTATTCAGGATCAGTGATTG
GCTGGTATAAGTTTCCAGGCAACCCTTTGAGCCGCAGGAGCAGAGTTCGCCATTTCGGTCAATAGTGGCGTGGCCAATTTCTCCCGCAAAATTCTTAACACCCCG
TCTTTGTACTGTCGCGGCGGTTGGGCAGCCAGCTGATCTTTTTCCTTCTGTGCTTCAGCCTGCTCCTGCTGTTTCAAAGTAGTGTTCCTGTTGATCTGCACCTTG
TGCAATGATTCTAGTCGCTGCAATTGCAGCAAGTGTATTGATTGCAACTACTGTTAAACTTCAAAATAAAGCATTAGATACTGGAAAAATGACAACACAAGAAGT
GGCGAGACTTAGAGCCACCAAAATACAGACGGCCTTCATGGAAAGTAACAGTCCTTGGCCAGCCTCTACCAGAGCTCCATACATCTTCGTAACCAGACTCATACT
GGGCGCGGCCAAGTCCCAATCTCTGGGTCATGCCCTTTGACAGTTTGTTTGAAAACCGGTCAGCCAAGGAACTAGATCGGTGAAATCCATCACTTCCTGGATTCG
GTTAAGTTTACAAGTTCTCCAAATTTATTCGGAAATTGATAGATACCCGCTTGCGTTGCCCAAAATCTTTATCAATTTGATTTAATAAACCCCAACTCGAAAAAT
TTAGTTCATCAGTCATTTGTTTTGTACTCCGGGCATGTCTCGCTAAAATCACTGACAGACAACGGCAGGCCGGTCTTCTCTGATCCTTCCACCACGGCCTCAGAG
CAGGTGTTGCGAAAGACAGCTCTGGAGCCGTGCTCCCGGGCGTGACCGTTGAAGCATCGAGTCCGGCGCTGATCGAGAAGTCACGATCGACCGTTACCGACGGCT
TGGGATGGCCGGCACGCCGGGTATCGCGGCGCGCCTGTTCGCCTCGTTCGCACGGGCACGTGTGAATATCCGCGCGATCGCCCAGGGCGCGTCCGAACGGAACAT
TGGAACAATAACCTTTGTATCAGCGTTACCTTAATGATAAAATTGACACCAAATAACCTTACGAGGCATATATGAGCTTTTTTAATAGCTTAGTTGAAACTCCTG
GGGCGACGTTTGGCTTTAGTAAAGAAAAATAATAACTACGTTGTGGTCACATTAACTGATGGTAAATTAAGACCGCAAATAGGCGTTCATCGTTTAGTTGCTCGT
TGTCTGGCGGCGTCGTGTCGAGGGACGAGGCGTGAGCCTGAAGGACCGCCTCCTCGCGTTCGAGAAGACCGCGCTCTGCGTCATCCGCAAGTGGTGGCGCCCGGT
GTAATACCAGGTCAATCTCCCGGCTGGATAATCCAGAGGTGATCAGTTGCTTGCGTAGGATTTCTTCTTGGGCGGTCATTCTGTAATTGCCTTATTGGGCTTGCT
CTAATCTGAGCGGTATCTAGAAACGCTTCATTAGCTACCATGTTTAGATAGTATGAATTGTAATAGGTGTTATATGATAGAATGTCTAATAGAACAGAAAGACCT
GCCGGAAAAGTTGGTATCAATTTGCATTTTCCGCATTAAATCCTGGTTAAGTGCACTAATTCCCGCCTTTAAGCCACTCCGCAAATTCGCCAAATCCTCACTTGC
GAAGATATTCAAAGTTAGGATGATGAAGAAGAAAGTCTCCCATAAAACTTATTGGAAGTTGACCTTCAATTTAGTAGAAGATGCTATTGTTTCAGTCTAAAAAAT
AGTATTGAAAGTTAATAGTTAAATTCATCGACGACAAGTTTAGTTTCCCCTACCTTTACTATGATAAGGCGGAACAGACTTGGGCGAATGAATTCTTCCTGTTCG
CCATTAGATCATCCTACCTTTTGTATGACCTTTAATAGCACAACCATCACCACGAGAAGCTGTACCGCCTGATTTGTAGCCTTTTACAGAACCACCACATTTTTT
GGCTCAACTACAAAAAACAAAGGATGCCTTATTGAGTTCTGAAAACAACCTACGTTTGGCCAACGACAAAGCGGATGACCTTACAATCAAAAAGTTAACCCATGG
GGGGAATACACAACTCCTCGATCTTCAACACTTCCTCGAGGCAAAATAGTAAAGGTTAAGAAATAAATATATTATTATTTTTTTTCTTTGTATAATAATATATAT
GCATCTCGGGAGGTTCAGATAAATTCAAATATTCTGTAGGTTATGCCGGCTTAACGAGTGACGAGATAATGCTCGGATCTTCATTTAAGCGCGATAACATATCCC
ATCGAAATCACCAATTGTAATTCACTCTAACGAGCGAGAGCATCTCGCATCACTGCTGCGGCAGATCGGACGCTGGCCCACCCAAAGCGCCTGCGGTTCCCCTGG
TGTTCATGGTTTTATGCCTTTTCTATTGTGCCGCCCGTTTTGCGGGCGAATGTTGTTGCATTGGCGCGATTAGTGAAGCGGCGGTACGCGTAGGATTCAACGCCG
CTCGGTGTCCGGATTGCCCTCGATGATTTTGGAACCGGTTATTCATCCCTGACGCATATCAAAAATGTTTCCTGTCGATATCGTCAAACTGGACCGCAGTTTCAT
CCGGCCATAAAAATCGCCCAAGCTAATCTGTGGGCTAAATAATCAATTCCATTTATTCTTATCGTTCTGTATCCCTTTTTGTGATTTGATCCAGCCACTGATCCT
GGCTTAACGACGGCTGCGCCCCGCCGCACGGTCGGACAGGCGCGTGTGTGTGGGTGCGCGTCGCAGGCCGGTGGTGCCCGCCTCACGCGCACGTCGCGTTCCTTC
GTTCATGCAATCGAATTGTTTAATTGGACCATCGATAAGATTATATGTCTTAATACAATTGGCACAACATTCGAAATTGCATGTTTTGCATTCAATCTTCGAATG
CAAAGAAGAGTTGTTTGATATGATGGGGTTTGATAAAAACAAAGAAAGAATATGAATGAATATTCGTGTAACTCTTCAAAAGAAGGCAGCGTCAACCAATGATAG
GGTTCATGAGCGGGCGGCCAGTCCGCGCGAGCTCGGGTTTGGTTTGCTGCTCGCACCGAATGCGCTGGCGGCGCTCACCGAGCTTGGCATCGTGGGCGCGTTGTT
GGTGTTGATGCCCTGGATAACTACCGTAAACCGGAACTTAAAGTAGTGGGAGGATAGAAAATGAACGCAAATGAAGTAGCTGATGCAATGCAAAGTGTTATTTCT
TCCGGCTTATAACTCAGGAATAAGTGACGGTGGCGCTTAGTGGATAGCGAACGAGCAAAAACCTTACTGCAAGACGACCTATTCAAATCCCTTGTTGACAAACAA
AGTGCCAGTTCTTCCTCAGCCACCTTAATTCTTTGCATTACCTCTGCATGGTCTTCTTCGAAGTTGAGGACTTTCAGCTCTAACTCGTTTTCTCGCTGCCAGAAC
CGTCTGCCGCTGGCGAAGGTGGTCTTGGCACAACTGGCGCTGCTATGGGCTACGGCGGCATGGGTGCTAACTACGGCGCACAAGGCGCACAAATCGGCCAAGGCG
AGACCATGGATGAAGGCAGGCGAAATCACCGACAAGGTCATTGGTGCCATAGAAGGCGGCCGGTACAAGTTTATTCGTCTCAATTTTCCGAACGGCGATATGGTT
AGCCGCAGGGCATACCGCCGCTCCGTATTCTGGTGCGTGAAGCTCCCCAGCTCCTCCGCATACGACACCGCGGTTAAACGCACTACCCACAGATCGAACGCCGCG
GGTAAAACACAGCTGCTGGCAAAGTCCACAGCAGTAGCTGCTGCCTTGATAAATACTTACGCTGCAATAGCTGGACAATTAAGAGCTTTTGCTGGCGTTCCAATT
CTTTCTTCTATTACTGCCTACCTAATTTCTATTTCTTCTGCTGCCAATTTCATCCCTCAAATTATCGCTTTGGTTTCTATTGTTTTTATCTTTCTTTCAATTTTC
TGGCGACGCGTTCGTCGTCTTTCCGGCACTGCGAATCATGCATGCCGGCGACATCTTCGCGCGCAAAGGGCCGCCGCTGCTCGACGCCAACAACGGCGGCAGCGG
AAGTTGTTGCTACTAATGTGGTTACATTACCGTTTGTACTGTTTAATGTCGCTGCTGTTGCTGTTCCGGCATTTACCGTTGTTGCTGTAGCAGTTGTGAATTACC
CGTGGTCAGAGCAGCACAAACTTTGCCGACCGACTCGGATAGGCTACCTCTGGCAACACGACATGGCTTATCTCAACGCTGCCTCGCTGCGTGCCGTCTATCTTG
GGTAACCCTTTTATTACAAATTCACCAGCAAAATTTCTGCAGCTTGGTTTCTCCCAGAAAATGTAAAATTTAAAGCCAACTTTATTTCAAAGAAATTTTGCATTC
AACTGTAAATAATTATCCGCCAAATTTTGATCGTCGCCATAACGTGAACCTTGTTTCATCATTTACTTTTGGCAAAAAAGAAATTGGGAGATCAATGCGCGTTGG
GGCGAGACTTAGAGCCACCAAAATACAGACGGCCTTCATGGAAAGTAACAGTCCTTGGCCAGCCTCTACCAGAGCTCCATACATCTTCGTAACCAGACTCATACT
TCTTCATCGGCGGGGCCGTCCGCGGCTTCCTCGTGCTTTATCAGGTCGCCGGCAACGGCCGCCAAGGCGGCTGGTGGTCGCGCTGCCTGGACCCCGACGACCCCG
GGGGAATTGGCTGAGTGGCTTAAAGCAGCGGTTTGCTAAACCGTCGTACCGGTCAACGGTACCGCAGGTTCGAATCCTGTGTTCCCCGCATCAAAACGAAAAGGC
TCCAAGGGAATGGGTGGAAGTAGGTAAATATGAACTGCCAAAAGCAGCAGGTAGTGAGTCATAGATTAGTTGAAGCTTACCACCGAGCAAGAAAAAAGCTCAAGG
TAAACTCGTGTAAAGTTGATCCCACCAGAAGTGGAATATCTTTTGATTGCTCCAGCGCTTTTGGGTTGGAAGGTTGGTTAGGTAATACAGAGCCATCGATTGTTT
NGCCGTCTTCGAAATTGCTTCTGCTCATATTTAAATCTGGTCTTGCATAATTATTATTGCCTGGTCTTCCAATTGGAGGTGGAATTGCGTTTGGACCTTGAGTGG
CAATTCTAATATAAGTTCATTACTAACTAATCCGTTAGAGATGAATGCGCCACAGCTACCCAATCCAAATTTTGCAATTGGTGGTTATTTTCACACTGCAATATT
GATCTGCAAATGAATAGCCTTTTTTAGTTGCTACTGCTCTTATTTTTGCCGCAGTCTCTTTACTTAGATTTTTGCCAGCTTTCTTTTTAGCCTCATCAACTTTAG
ATGAAAAGCAACCTAAATGATGAATGCAATAAATGTAAGAACTAAACAAACAATACTCCCTGAAAGGGAATTCCTTTCTTTAGTTTTGTATTACTTTTAGTTGAA
TCTATGCAGGTAGATCATGCACAATCCTCCGCTATCAGTATGTGGAGGGACGCCCCACTTCAAATATATCCAGAATGAAGATGTTAAGAAATTTGAATTTGGGTT
TGACCACATGGGTTTAGATAGCTATAAGACAAATATTTGTACTTAGAAAAAAGTTAATACTGCCCCATTTTCAACAGTTTAGTTTCATACGGCATTGTTTTTTAG
GCTTTTCTCGCGCGCTTACGCTGCCAGCCGCTGTCTCCGGCGACAAAGTGAAAGCCGCCTATAAAGATGGCATCCTCACCGTTACGCTGCCGAAAGCGGAAGAAG
CTGCGGCTGCTGGTAAAGAAGTTTCAGTCATTACAGTTGGTACAGCATCAACAGGATCAGCAACAAGCGGAACAATAATCAGGATCCCATTACTAATGGTGACAC
ATTTCCTCATGATAGAGTATTGAGCTGTTGGATCATTGTGATCGTCGCCTGGATTTTCGTCTGCTGGTCCGCGAGCCTGGTGTTGAACTGGTCGAAGTACGCATT
GAGTACAACATATCTATCAATCAACTTAGACAACTCAGCTATGTGTTCTGGTCGCTCATAGTTGTCACGAACTATCTTGCGAATTTCTATCGGAAGATACTTACG
CATAATTAAGAGAAATCAAGATTGAAAAGCTGAGCTAGTAAGTGAGTAAATAAAGAGTAAAAAGTAAAATAATAAAGTTAGTCAAAAGTGATAAAAAAGAGATTT
GTCGCAGATCTACCGCCAGCGGCGAAAATTCCTCCCTAAGCATCGCTGCGAGTACAGTAGAAAACATGGCTTGCCGCGTCTGCCGATGTTTGCTCCTGTTCTCCG
GATGCGACCGACGCGGGTGGTGCTCAGCTCGAACTCGGCCGCGATCGCCTTGACGTCGGTGCCCTCGCGGTAGCGCTCGATGATCGTCGCGTCCCGCGTGGCTCG
TGATTTCTTTGTTTTAATAAAAAGTTAAGTTTTCAATTTTGAATTCTTCATTTTGTATTAAAAAAATACCTTTTTTTGTTTCTTCTCTCTCTCTCTTTGTTGTGG
AGTTCCCAACGGGACAGCAAATTGGGTAATCACTTCCAATATTACCCGTGGAGTTTCTAATAACCTTTATCTGATGAATGAAATATTCTCCCGTGGTGTTCCCTG
GGTTTAACAAAGATGGGAAAGATATCACTTTTCAGTTCTTTTTTGTAGGGTCAGGCTGTTGCTTCCATCGATAGCTTATTGAGTAACCAGCCAAGTATGTTTACC
GACGGCGCCACCCGTAACATCAGCAGGGATAACTTGCCGGGTACGGGGGGTTTGTTCCAGAAGAACCCACCTTCACCCGGTTCTAGTTTCCATTCGCCTTCGCCG
TAAGCCATTGGCTGTTGCTGGTGCCAATATGTTTAATCATAGTTTTAAGTGTTCAATAGTAACAATTTTGCTCAGTGCTTCACCTAGATTCTCGTTGTCTTGAAC
CGTTGCTGCCCCAACACACGATCCTCTCTCACAATACCGATACATCGTTGCCATCCTCCTTCGACTAGATCCAGCCCAATATTTTTCCTCGACCCCACCCCCTTG
ACCGCTGCATTTTGTGTTGCTATTCTTATAGTGGTAATGCGTTATTTGTAACCTTAAATTAGTGTTATTAAAAGGTAATAGTAATTAATTTGCCATTGACCTGCT
CCTGTGCTGCGGCCTTAAACAAATCGTCAACCTGTGCGTCGGTCATCTGCAAAGCGCCAGCCAGCGTTGCAATCATCGGAGAATTGCGCTGCCAGATAAGCGCGT
CTAGCTTGAATTGTTGTTTTGTCATTTCTCCCCCCTTGCTCTGATGGCTGCGGCTTCATACGAATCTCTGGCTCTATCGCTTACCTTCGGAATTAACTCTGCGCT
TGCGATATCTTGGGTATGCGAATAACTTACAAATTGATGTTGATGTTAAGACTAGAAAAGGAACACAAATCAATTTTCCAATGTATGGTGTGAGTGATATTGAAG
AATTGAATAATTTAATGATAGTATCTTTTTGTTCTTCCTTAATTGCCAAAAATTTTGCTTCAATTGGATCTTGTTCAACAACTTTTTGTTAAGACATAACCAACT
CTTCGTCAATTCTTGCGTAGATTTTTACACCATCTTCATTTGAAAGTAATAGTTTATATGTCATCATAACTCCGCAGAAAATCCAAGATAACCAGTTCCACTAGG
GGGTTCGAGTCCCTCCGAGCGCGCCATCTATTGGAGATACCTATGTGGAAATGTAAACACTGCAATAAACAATTTGAAAATTTTTCTACTGCAGAAAAAGCAAAT
CCAATATTATATAAGGTGAGTTCACGGCGTTCTGAAGCGTAGGTATGTGGATACTATCGTGATTACTTAACCGTTCGAATCGGTGAGCCGACTTCAGCACCTTAT
GGCTTCGACTTCATCGGCATCGAGCGCGAGCCCGAGTACGTCGCCATAGCCGAGGCGCGGATCAAGTTCTGGGCGCAGCACCAGGGCCGGGAGATCGAGGACGTG
ATGTATGTTCTTCTTTTACCTTCTTTTTATTTACCGCCTTGTTATACTTATCCTTAAGCTCCTGAGAGATATCAGACTCGTTAATCAAATTGGTTATATCAGCCT
GAACTTTGCCGAGATTAATCAGAACCTTCTAATTAAATCTGGTAGTTCTTTGACTACATTATCGTCTGGTAAGACTGTAATGGCTACTGCTACAGTACCTGAAGT
TGTGCGACTGCCTCAATGAATGCCGATTGCTTTCCATCATAGGACGAAGTCGTCTCTTCCAGAGAAAGAACGTTATAATTCCGCAGCTTTTCCTTCATATATTCC
AATCTTTCTTCTGGAACTGGGAATATATTAATAAACAGAAATCCGCTTTATCCATATAGTTTCTTGCTTGTTCCGGAACTCTTTAAGAAATATCCGCAGCGTATG
CCCCCAGAGAAAGAATTAACTGGGTGGCTAGGGCGCAAAGAAGGTAAGGAAACATGGCGGATAATATCGATAGCATAATGCAGGGGTTTATTAACACCTTCATTTC
TGCCATTAACGAGTGTTTTTACCTGGCCCGACGAACGCGAATCGTCGATGGAAACTGCATATAATTTTACACCGGTTTCTTCCTGCCAGTCTTCGTACACATCAGC
GAGCCCGATTGAGTCAGGTGGGGGTGAGGTCGGCTACGGGGGATGGGGGACGGGACTGCGGCGACAAGGAAGTTCCCAGTCAGNTTCTAGGAAACCCGTACCCCAC
TACCCTCGAGGGTGAGCCTGTTCGTAAAGTAAAGAAAAACCCCCGGAGCTTTCGCGCCGGGGGCCTTCTTGCTATGTTAAGTATCTGATTTTACTCAGAGACCCGG
TTATCAGTCTGCACAGTTGAATGAAGAACATCATACGTTTTATCCGCCATCAAAAAAATCGCGTTTAATGCAAGCCTGAAAAACAACGATGGTTTACTCGCCAATC
GGTGTTTGCTTATTATATCGGGCAGTTCATTGTATTCAGTTGTTTCATCTTCAATATCTGTTAATTCGTTATCGTTAGCTAATTCTTTTAAGTTTGAGTTTTTACG
TGCGAAGCAATTACAATCCCGTTGCGGAGGAAGTCTGCATCAGTGAGAAACTCGTAACGCTCGTAACCGTGGGTCATGGAGTGCGGACAACACACCCCGAAACCCT
GCGGCGGCCGCTATCGCGGCACGCGTCAGCTGTCGATGGCTGGCACCTGGAGCGTGCAGGTGACCGTCGCGCGCAACGGTCAGGAACTGGGAACCAAGAGCCTGAG
TGTTAGATAAAATTTGGCCGGTTATATTGCTTTGAGCCGATTGACGCGCAATTTGCCAAGGGCAAGAAGGGCAACTGGGCCACTTCCGGGAATCACTGGAGGAAGG
CAGGTAACCCGGATACTGGATATTTTGATAGATATATCTCTTTTGCGGAGCAAATTAATTTACCTCCGGCACTGTGGTCTAGGGTAACTTTAACATTCATCATGCT
CCTTGACAGCCGTTGGCGGTGGTGCGGGTGCGGGGTTCAATCTGGCTGCATTGGGAACAGGGGGATCGGCTGGCGGAAATGGCGGCGGGGGCGGTGCGCGGGCCGG
GTGGTGGTTTAGTAGATATGTTAAGATGCGAAGGTTTTATTAATAATTCACGAGCTTTGAATAATGAGAATTACGAAAATCTAAAAAGTCAATGTTCTATTTTAAT
TATTTACTCTCTCGTCTTTCGTCTGGATAATCTTGGGAGTGAATTCTGCCTGAGAAGAAATCCAAGTAACTTCGCCGGAGAAATTCATAATCTCTTTTTCATTTTT
CATGTTATTCGTGGCGCTGATCATATCAACAATACTCCACGACAGATAAATATTTTTCTGCCTTTAAAGCGGTACCTCCACTATACGCACATGTGCCACTAATCCT
GAGCCGCGTCATCGAACTCCTGCGGCTGGTGGGCTTGAACGAGGGGCACGCGAACCGCTTTCCGCACGAATTTTCCGGGGGCCAGCGGCAGCGGATCGGCATAGCG
TTGGGAAATCCCAAAATGATGGAGTATGCTAATGCTGAATAAAACAGAAAATCAGGAAGAAATAGTAAAGTATCAAAAGCAAGGTAAAACTGTCTCTTTTTTGTCT
TGCGACGCGTTCTTCTTTGGACCAAGAATTGCTTGACATTTAGTCACCTATCTGATATGTGCCGCCGTAGTTACCTCGATCTTCAAGGTATTTGGGCAGCGGATTG
CGTTAACACCACGCGGGAATGCAATCTCTGCAATTGACATCTTATCAAACTGCTGACGGAAGTCTGTCACAAACTTCTGGACATCTTTCTGTTCGCCACTCAGAAT
TGGCCTGGTCGAGGAACTTCACGGTGATGTCCTGGCGGACACCGACGCGCACGCGCGAGGAATCCACGATCAGGCACTTGGCCCGCGAGTTGTCCCACGTTCCGTT
GATGCGCGGCGGATGCCAGCGCGCGAGTCCGAGTTTCGCAATCTGGTCCTCAATCAGCGGGTGGACGCATCCACGCCGTTTGTCTCTCGGAGTGTGTGGGCGTCGT
CGAAGCCGTGACCGCTAGTCGTACCAGGGTAACCGGTACAGCTGGCGACACTCGAAGGTAGGGCGTTAGGCGCGCGGACATGTCAGTCCCCGCGGCCGAGCCGTCC
CATTATTCTCTTCGCGGTACAGCTTCCGTTTTCCATGGTCGGTGCTATTTCCTGCATGGTCGTTATCGGCTGTATTTGGATCTATAAGCTGCTGTCCCCGGAATTT
GGAGTGCGGCTGGTGCGCCATGGCCCAGGCTCGGCGGAACCTTTGCTGGGGAGGATGCGGTGCGCGTCGGCCCATTCGGATACTAGGAGGACGGGTTCCGGGCGGC
GGTGATCAACAACGCGGGAGGTGATCTTAAGGCTCTGGGGCAAAGGCACCCCTCCGTTTAAAAGTGTTGCCATGGTGCTGCAATAGCGGGAAATCAAAAACTTGTG
CGGGTCTCAAAAAATACCCGATTTGGAATCATACCGGAATTTCGAATGTAGGATGGAGCACTGGAAAACTGCTTGGGTTTAATGTAGATGGTGATCTGGTCCCGGT
TAAAATGTCTGAAAAGAATAAAGAAAAGATGAAAGAAGACATTGATGCTATGCTTTCTGGCGAAAATCTTTCTGAAGAATTTAAGCTAAAAGCAACTACTATTTTT
GATCGACGACTCGACTGCCGCCGCCACCTACTCCGACCAGCGGAAGTTCGTTGAGCTCACCAAGCGCTGCGTTGCGAATCCGCGCCTCGAATACCAAGCCAAGTAT
GAGTTGTAAATAACTCTGGAACTAATTTTTGACAGAAGCTGGTTATCAAGTAGTTAAGATTGCATCTGCACAAGGACAAAGATTAGCTGTTAATTTAGCTCAAGCT
ATGAAGCTTACAACGGTAGGGATTGATCTGGCGAAGACGGTGTTTCAAGTGCACGGCGTCGATGAACGCGGCAACGCGATTGTTCGCAAGCAGCTCAGACGCAACC
GTATTATTTTTTTATACAATTGCATATGTAATATTGATTAAACAAACAAACATAAATCATAGTATGATGTACGTTTTACTGTAAATGTTTTTATTTTTTTAGGGTT
CCTGCATCCTTAAGGCAACTTGGCACGGCGCAATAGATCGCTTAACCAAATCGTCTACAAGCGACTCAAACTTAGCTACGGGTGAGTTTTGACCGTCAAATGCTTT
TGCTGCAGTGCCCTCCGCTCGTGGTAGCGGCCGTGGTGCTGCACGAGAATTTGCCACCTGCGTGGGGGATACCACGGAGAGCAACGCCGACTGCTGCGCCTCGCGC
GAAGATCCAGATGGCATCTTATTAAAAGATTCAACCGGAAATTTAAATTCTGCTGAAAGAACTGATGTAGTTACATCTGATACTGGTGAGCAAGTTCAAACTACTG
GGTGCCCTGCCGCTATATTAACTAACGGAGCAATCTCATGCGGCTTATTTTGTATTGGCGTTCCAGTAAGAAGTAGTACTTTTTTACTTTTGGCTGCCATCTCTTG
TTAATTTATTTTATTTAATTTTCAAGTGGTTTGGCTGGTTTATTACGCAAACATAAACATGTAGACGAATTCTCATCCGGTTTTGATACATCCAAGAGCTATCAAT
ACCAATTCCACTCGCTCTGAGGGCTTCGGCCGGACCCAGGCTGCCACTTGCTCCATCAAGGCCGCCACTTTGGCTCCTCGCTCCAAAGAAACCCGGTGAGTGACTG
CGGTAGTTCTCAAAGCAACAACGTAGCTGTTGGGCTCAGTGCCCTTAAGCGCAGCACATCCAGTGAAAACGTAGCTATCGGAACTTACGCAATGGGAAGCGCTGAT
CCCGCAGTGATTTTGCCAATTCAATTCGTACCATGATGGCCGAGCTGTATCCCGATCGGCCGTTTCAGCGGTTGGCGCAAGATCATCCGATTTTTCGTTCCTTTTT
GTCAGTGACGAGGCAAAGAGTTTAGGCATAAATTTATGCCTAAAGTTGATGCTGTATTTATGGCGCTCCCAAAGCCTATTGAGTGGCGTAGTTTTTTACGAAAACG
TGCGGCGCATCTGGCGGTTGCCCTTCGGCGAGTGTCGGCTGCGGTTCACGCCCGCGCTCTCTTCCTCTCCCGGGCATGCTCCTACCCACGAGGAGAGCTTCTTGGC
GAACCACCGCCACAAATAAATGTGCCAAATACTTTTAAATTATGTTTTCTATTCCTTTTGCAGGGTAACCATCAGCTAAATTCCAGTTATATGGAAATTTATGGTC
ATTTACAAAGTCAGTTCAGCTACGAACAGCTCGTTAGGATTATATTGCAACTCAATAACTTTGATTATCAGAATGGTCCTAATCGCACAGACCGCGATGAAATTAG
GGCGTAGACGACTCGGTAATTTTGGCAGAGCGTCTGGCCTATCCAGACCCAGCCGAAGACAACGCCAGCGCCCAGACACAGGCATACGACGTACGCACCGGCAACG
CCGGACATTGTTGCTGCTCCTTAACCGAATAGCGAAGAGAAGAAATTGAGTGCGCCAGATCCGGCAGAGCCTATGTCTGGCAGGTCGCTGAATATGGATTTGGACG
GTTGTATTGCTAATGATGGCTTATCTAATATTTCTATGCTTAACACTTCAGTTATTATAATAATTCTGTACCATCTACTCCAACAACGTATTACCTAATACCTAAC
CGGTGCTGGCCGTCAACGAAATGGCGTTCGCGGTCGCGATCTGCTGCTTCTACAACCGCGTGGCCACCTTGATCGCCGCCCCGCCCGAGGCGGGCTTCGAGCGGAT
GCTTCGGATGGAGGGAAGTAAGGAGATAGTCCGTTTCCTTCATGACATAGGCGCTGTACCGGGCGCGCATGACCTGTTCCGCCGTCAGCGCGTGTTTCTCTCCCGA
CCATTTGCGTCATTTGTGGCCTGCCTTGGTTCGGCCGCTCCAGACTCGTCTCCGGGCCTCCGGTAAGTCACGATGCGCCGGACGAATGACCCTTCGCTGGCTTCTT
GGATCGAACAGGAGGCCGCCAGCGCCGTCAGCCTCCGGAGCCTGGTCCACGGCTCCAAGGACCCCTGAAGGATGAAGGATGAATTATGAAGAAGACCTCAGAACCA
CGCGCCGACATTGTTGGTTCGCTCGACCGCGAAATACAAATTAACGTGGACATGTTTAAAATGCAGGTGGCCAGCGTTTCACTATCCGACATTGAACGTGCCATTT
TAGTATTTGAATCAATTTGTAGAATCTGTCCTTTGACTGCTATCTTCTAACATAACAATAAGCTCTAAAGATTTGATTAACATCGGTGGATAGAGTGGAGTTCTTT
GCATTTAACAAAGGCATTCATGTCGGAACAGCCCAATATGATCCAACAAACAGCTATATATTTCTATAGATTTTAACTTAAATCCGTTCAGCTGCACATTTTACCA
CGTCACCAATCCTCGGTACCTGTTTATGGCGTTGACTGGTGTCATTAGAACGCCGTTCAAAAACCAATCCCTGAGTCTCCCATGGTGTTCCAGAATGTTCCCTCAA
CGACGACTACTCCGACGCCGACGCGCTCACCGAGGCAGACGTGGCCGAGATGGAAGCCGCGCCCCAAGAGGAGGCCCCGGAAGAAGAGGAAGCCGCCCCGGTAGAT
TATCCTTTGTTGAATTTGAAAAAATAGATAATCGAACTTAAAGATATTGTAAAGCAGGATTTTGAAAAAATATACAATACCAATAAGGGTCGTTTTTCAAAGGTTG
CAACACTCAACGGAATAAAAAACGGAATGGATTCTTCATGATCAGGTTCTATAATAAATAATCAGTAAAAGATACAATTTTCCCCTGATTTTTCAACTACTACTGG
GCCTCTCCCCAAGCCTTGTATCTTCTTCTGTTGGCTCTACGGTTATTGCATGTAGTTCATGAGAGTTCTTGTTTTCATAAAGAAGAACTCCTAACTTCTTTCCAAG
ACAAGAGCCTCGGTCGCTTACCAGTAGCATTGACGAAGTCCAAGGCCGCTCGTACGCTGAAGCATCGGCCCGATACGGGTTCACCAAGTCGCCACGGGACGTAAGT
ACCAATTCCACTCGCTCTGAGGGCTTCGGCCGGACCCAGGCTGCCACTTGCTCCATCAAGGCCGCCACTTTGGCTCCTCGCTCCAAAGAAACCCGGTGAGTGACTG
TCTCGCCCTTGTGTTTTGTAGTATTTCCGGGTATTCCTCCCCGAGGGAAGAGTTAACTTTTGACCCCGCTTGTGAAATCTGCTATGATAGGTTTATTGATCTTAAC
AAACTGACTTACCACTGTATTCTGTTGGGTCTGAGCTTAGAATCCTAGACACAGATCTTGGTGAACGACTAGGATACGCCAGACCGTCAAAGATTCGCGAACTCAT
ACGCCCACAACAACCAGAAGCGCCAGGCTGATGAGCAGCCCTACTCCGCCCTGGTCAGGCAACGCATGGAATTTGCCGTCCCAAAACAGGACAAAAACCAATACCG
GCGACACGCGACACCGGGCCGGAGATGGCCCTCAGGCGCGCGCTGCACGCCCGCGGGGTGCGCTACCGCCTGCACCACCCCGGCCTGCCCGGCAGGCCCGACGTGG
CGGTCAAAGCCCATATCAAGAACAGCCACAATGCCTTCATGCTGCAAAATCATGGCGTGCTGGTCTTCGGCGTGACCATGGAACAAGCCATCCACAATATGGCGTT
GTTAGGCTGGAAAGCCAATTCTGCCGCACTAAGCTCGGCATGGTGGGACTCCTGGGTCAATGGCTGGAATCCGCAGACGGCGCAGTCGGGCTTCGCCGTCACCGGC
GACGTTGGCGGCGATGGTGGGAGAGGACAGCGTCGTCGTGGCGGCCGCGGCGACCGTGCAGCCAAGGACTTTCGGAGTCCAGATGCTGAGGAAGAAGTAGACCTTG
ATGCATATGTGTATGTATCATGTATGGTTTCTTACTCTTCTTGAAAAATATCGTAAAAGTAAGCCGCTCGGCGTCCACCCCATGATTTATATGTATGCATGCATGT
CATGGCACGTCATCGAGCCGGGCCAGCCTTACACCCATGGCTGGCACATTGACTTCCTGTGCGAGCATCTGGAGGCGATCACGCGCGGCGAGATCATCAACGGGCG
AGTTTAGTCATCTTGTGGGCAACATGACCAAAATCGAACTGGTCTATAAGCAAGGTAAAACCGCCATAAGAGTCGTATCCATGACCCATCTCAGGCAGTTGAGCCT
ATAAAGAATGCAGAAAATCATTATGCTGGACTAATAAAACAAGAAAATTAATTAATAATAAATGGATGGTGGAAGAATCCAAGAATAAAAATATATTGTAGTTAAT
TGAATTAACCGACCACAGTCTTTATTTGTACGGTTTTTGCCCTGCGTGCCGAAATCTTAATTACCATAACTCCTCAAAAACTCCATGTTTAAACCCCTTATTCTTT
GATAGGCCCTTGCCGTCCTGGTGTCGCATTCGTTTGGATTGATTGCCGCCGCGCAAATAAACACTACGGCGTAGAGCATCAGTTTGGCTTGCCGCCCTTAACAACG
GATGTGCACGCCCTTACCGGCCAATGCATTGAGGTAAGCCGGTAGCGTAGACACCAGGGTTTTACCTTCACCGGTGCGCATTTCGGCGATCTTGCCGTAATGCAGC
CTGGATGGTGAGCCGCCGGATGTAAGCCGCCCAGCGCACGAGAGGCCAGGTTTTAATTTTGGGACGTTCCTTGCAGAACAGCAACGTCGGGCAGGAACAGGGGAAT
ACCAAGTTCTGCGCATCTGGCCCGGGTTGAAACCAGAGATACTTGAAGGCTCGATTCCAATAGATGCAAAGTCTCCATGGAAGCCGATCATAGAGTCATAGTTGGT
GAGCATTTGCCATCGGCAAAATTGAAATAAAGGATTAGCTAAAGAATTCTTTTGCCAACGCAATTTGTTCTGGCTTTACAAATGCAGGAGCATGACCTACGTTTGG
GTTGTAGTCGGTTTCGACAAGCCCGGTTTTCCTATTCCCCGGGGTCAGAGATCCCTGGCTACAACCTAGGGCGTGTATGCAAAATCCCACGCAAGCCCGTAGCGGC
GGCCAGCATCAGCGGCACGGCGGCCGGGCCGATGTGGGCGTAGCTGTCTGCCCAGGTCGCCGACCTTGTATTGCAGCACCAGAATGGAGCCGGTGTTGTCGGCGCC
GGTCTCTATCGCCATGAGCGAACTATTTTATATGTTCGGGGAAACCCTTAGACCTTGGCAACCTTGGCGGACATATGAGCAGAACATGGAAGATGTAACAGTAACT
TTAGCAGGTGAAAATAATTTCGAGAAAACCCGCCTTCTTTATAACGAATATAAAATCTGTACTGCTGGGGATGAAACTCCCAGAGTTATAATAAATGATGCGTTCG
ACTCAAGTCTTTCCGTAACGGTGATAAATTACAAGATCTATCGACACAGAACCCGTCAGCCCAAGGTATTATGCCTAAGGTGACCGAGGAGATGTCACAACTATTT
CTCTTCTGGTAAGGCACGGGTTTCTAATGTAAAGAGCAATTCCTTAACAGGCTTTGGGTTGATCTTCTTTGCTCTTTACTGCTTCTAATGCTAGTTGTTGAATTTC
CTTTTACTTTATCAGCAACATCTAGATCATCCATTACAAGATTAACGACTCTATCATGTGAGTCTATACTTATAGCCTCATTTACAATTTCATCAATTGCTTGTTG
CAACTTATATATAAATCAAAACTTAGATACATTATACATTTATGGAAACGATTAAAGAAAAATTACAATACTGCAGTTGCAAGCATGAGTGCATTAGTTGAGAGAG
TTTAGAGCGTGCGGGTGATGAGGCTGAGCGCGTTGCCAAACGAACTAAGCGTTTAATCGAATCTGGTGCAACTCACAATATCAACGTTGCTGAAATTCGCTTATCT
CCGCGTAACACACGCGGATTGCTCATACCGGGCTCGACCCGGCGACGCCTACTAATCAACACGTAGGTCGTGGCCGGGATGAATCGAACGCCGCACGGGTATGGAT
GTGGTGGTGGCGGTGACGCCGATGCCGTCGATGATGGCGCGGTGGTTCCACGGCTCGCCGACGCAGAAGCCGTCCATGTTGCCCACGCGCATGTTGGCCACCATCT
CGCAGGTAGCCAGGTGGAAAAGCCAGAGTCGTGGACAGCGATGCTGGGTTAGTTAGCTCTTCAACCGAGATAAAGTGAAATTCCAGAGTCGTATTCGGTACTGGAT
CAAAGGGATTAAAATCATGATTGCACCAAATGGAAGTGTTTAGGGTACACATGCAGCGAGCCTGCATTCCAGTACAAGTTGCCTTTGGTCAAGCCAGGGTAAACGT
TAAGAAACCTAAATAGGGTTAGCATACTTTGCTGGAACCTCTAATAAATACGCTTCTAATTCTTTAACTTGTGCTTCTGTTAGTTGTATCATAGTTTTTAGTTTAT
TCATCTGATTGCTTTTCCAGTTGCTTGTCTTCATCGCTTAGAAATTTACTATACACGTTACCCGCCTTTATTCCATAAGTGTTATTTTTGATGCACCAATAGACTT
TCTTTTTTCGTTATCCTTACAATCAATATCAATAATGATGCTGTGATCTGTGAGAAGTCAATCACATTAACACAGAGCGACCTGATTTTTGACTTAGAAAAGCACG
TGGTGCTGTGGTGAAGTTGGCAATAGCAGCGGGGTTGGAACAGCAGTATCTGGCTTTAGCACCTTGAGCAGCAGTAGCAAAGTCTGTTGTGCTTGAATATGCAGCC
GTAAAAAACAGATGATGGATTATTACGTCCAAAATTAGAAGAAGGAAAGACGGAAACGTGAATTAGTTATTCGTATTTTACCTAACTTACAAAGAGACGGTAAAAT
GTTGCGTGGTTATAATGACACAAAAAATCACGCTATTATGTTTGATGAAAAATTTCCTATCAATGATGATTATTATTATCTTATGGACGGAGCAAGAAAAAACACT
CGTGATGGTCGCGGAGATGGAGAACGGGGCGATCGTACTCCGTCCGGCTGTAGCGTTCCCCATCGAGATCTACACGGATGAGCGGGTGGCGGAGTTCGATATTGCT
TCAGGTTCAAACTCAGATCATGATGTACAGAAGCTTGAACATCTATTAGAGGACATTACTCAAAACCTAGCAAAAGATGGAGTCATTGCACAAGATGAAAGACAAG
GGCTGATACAGTATCAAATCCTATTGCACAATCATATATTGATAATAAAATTAAATCTAAAACAGATGGAAAAATTACAAATAAATTAATTAGGAATGAACAAATG
TGCCCGACAGTTTGGAAAAATGTAATGGCTGACCCAACAGTACCACCAATGGATGCCCGCGAAGTCTTTACTCAAACTCTTAAAGGTCTTGGGTTTAGCGATTCTC
CATTTGGTTGGGTCATCAAGCGATACCTAGTAGAACTTAAACCAAACTCTGGCAGCTTCGATGAATGATCGACTCACAAGAGTTGAGGCCAAACTAGAAATTATTT
CCGGCCATAAAAAATCGCCCAAGCTAATCTGTGGGCTAAATAATCAATTCCATTTATTCTTATCGTTCTGTATCCCTTTTTGTGATTTGATCCAGCCACTGATCCT
GATAAACCTGCAGTAGTTTCCACATTCTGGTTTTTGGATCATAACTAATCTTATAAGCACCCCCCAGTGCACCTATCAGATAACCGGAAGTATCAACAGAACTTAC
CAACAGGAAGATGTCCAAGAAGACTCAATATTCTCTCCAACCTGTGTGGCTGGCTCAGTCAACGGAATGCGAAAAAGAGGACCTTTAAAGGCTGGTGTTCCAGGAC
CTGTACATGACATGCCTGATATTTTTCGTAAAACAATTCCAATACATAAACGATCAATTTGAAGACGACTCATTGGTATCTATCTCAGACAAGTCAACAATGAAAC
GGTACAATTTCCAGTGACAACAGTGGAACCCTTAGTAATCAAGTAGTTACGGGCGAAGAAAACTTACGCGAAACTTACAACGACATAGAAGACGGTGAATTTACAG
AATGCAACGCGCAGGCCGAGTGTTTGAAGATGAAGTAGTTTGGGTGGACGTCTATGACAACCCAGACGACTGCATTGATTTGGCGGTGCTAGAAGAGCGTTTGTAT
GTAAGCCTCACCTGACCTCAGGGGTGCATTACTAAGGGTGGAACATTAGGGTCTCTCACATCGAAATCAATCAATCTAGAATGAACTCTTCTAATAAATAAAAATG
GTCCCGCATAACAGCACCTTTGACTATTTATTCGAACACAGAAACGCTACCAATATCGGGGAAGTGATCGATATTGCACTCAATGACCTGGAAGAAGCCAACCGGG
GGTGCGTAAAACCGACCAGTCCCAAGCATCTTCAATCTCTACTTTTACAATATTAACTAAATCACCAATAAGTTTGGAGTATGGAGTTTCATTGACAGTTGTGACC
GCTTCAGCGCCTCCCGCAGCGCGGCGACTTGCGCCTCGGCGCGTTCGGCACGACGGCGCTGCGCATCGCGCAGCTCAATGTGATGTAGCGTTAAACGCTCCGCTTC
CAGGTCATGCCCTCGGGCACATTGCGACCGCGCTGGTCGCTGGTCGGCAGCCAGAACGGACGATCAAGCAGCAGTGCCGGACGATTGCGCACGACAGGGTCGCCGT
TGGCAATCAATATTACCAAATCACTTGGAATTACATTAATGTTTAATCCTGAGTTGATTAGTTCTAGTACAGAAGAATATAAAATTTAAGTAAGGTTAGGTTTTAA
ATGCTAGACTTCAATATAATCAAGAAATGCTAAACATACATGAAAGGCAACATTCCCAACTAGTTAGATACCTGGAACATAACCATGGTAGATCAGATGTCTTGGT
CAGGTAGACGGTGGCGATACTCTTCAATAACTCCGCGCCACTGGTGGGCGCCTTCCTTCTTCTTATTGAAAAGTCCCATTACGAAACCGCTCCTTCTACGCGAATC
GAAATGAACTCGCTAAACCGGGTGCAGGAATAATCGTCACCCACAAAACAGCTGGCGTTATCTTCTCCGGCATCACCACCACAGTTGAAACCATCAACGAAGCAGG
TGCTGTCCTCAAAGTAGAAAGGGATGGTGCCTGACGGTACCTGCCCTGTCGGGGCCATTGGTCGACGGTTGAATATTTCCTGGTCCAGCGTGTCAATTGCTGCCTG
TCAACACCACAACAATTTACTTGTAGATAAGCAAAGGAAGATTGTTGCTTTTATTGGAGTTATAGGTTCCGGAAAAGATCACAACACCAAGATAGAATTTGAAAAT
AAGGTAAATCTGAACGTGAAATTTTAAATATAAAATTAAAACAAACAGACCAAGTAATTAAAGCAAGTGAGTTGCAAATTGAAAATAATATTGCAACCACAAAAGC
CTTCCCAATCAGGATCATAGTCGTCATCTGGATCATAATCAGGGTCATCAAATTCTTCTTTACCTTCTTCATTTCTAATATCGTCGTAGTCTATGTCTTCAGCGCC
CATTAAAATCCTGAAATTATTAATTTCCATGTGCCTTCCATTTTTCTCAAAAAAGAAAACAAACAAACAAACAAACAGAAACTAAAATATAATTAATCCATCCCCA
CGCCGCGTGTTGATCGAGGATCGAGGTGACGGCGGTTTGCGCGGCCGCGCCTCGAGAGGCGAAGCGCGCGAGCTCCGGGGTTGAGATGGCGGGTCGTGTCGTTCAT
TTGCCGCCGCCCGCCGACCTGTTCGGCGACGACGGCGTCGCGCACTTTCAGTGGGTGTTTGCGCGCGACCGCAACCTGTGCGGCGAGGGATCCGTGCGGCGGGTCG
TTAAATTTTGGCGTTCAAATCTCTTTCCCTATTCAATTATTTTTGTAAAAATTAAACTTATGCAACAAACCAGCCTGGAGTCGATTCCATAAAGCAAATTTAACGG
CACCGTCACGGTGATTGGAATTTGGAAGCAGGCCTACCGTGACCCCCATCATCATCATGGCGGCCGTTGTGCACAAGCCGTGGCGTTACACAAGTGCACGAGTGCT
TACAGCGGTGCCACTTTGATTGCCAATGGCGGCAAAAGCACTGTTGCGCAACACGGCCTGGTAGTTGAGTCCTGTAGTGGTTTGGGCCGACAGAAACAGTGGGGTC
AGCCGCTTGCCACCTCGCAAGCCCCGGCCCAGATCGCTGGAAAGAGCGCAGCCGCACCTATCCCGGCATTGCCGCAGCAATCGCAAGCCAATGGACGCAATGAAAT
AAATTGAAGCGAATGAATATATTACGCAAAATGTACAAAGATAAATTCGACAGTCTAACAATTTGCATATATAGTATTCCGCAATATCAACGCATGTATAAATGAT
TCGTGATCGGGCTGACACGCTTTGGAGCGAGCGCGCCGTACGAGAAGATTTATGAGGGGCTCGGCATCACCGCGCAGCGAGTGATCGACGCAGCGAGGCAGCTTTT
GATTCCTTCACCAATTAACTCGCCTTGAATTGCAATATTACGATACAGGCACTAATTCGCGTAAGTTGTTTTCAATATCATCAGGCGCGGAGCTTGTCTCCAGAAT
AACACGCATCGCAAGTCCCCGGAGAGGGGCATCATGACTAGGACAAATAGCCCTTCATTCTCATCCCGCAGAGCGGTACAAATGAGCACCAACTAAGCGGGGGCTA
TCAACTTCAACGATTAAAACTTGAACATTGTCACCACGAGCGATACCGCCTCAACCTACATCGGCGGCTTCACGGGTGATCTTCAAAGCACGCACAATCACTGCAG
GCCACTGGACAATTACCCAAATTTTCCGAGGACCTTTTTAAAATTGAAGGATGGGACCTCTTTCTCATCCCCACAGCCGAAGTGCCGGTAACCAATATTCACCGCG
GTGGAAACGACGGATTTCGATAGCCCATTCATCATTGCTGAAAAAACAAGCCGATGACTAGATCACCTGGCGCGAAGGCGCGTGTCTTTTCGCAGCAGGGCCCTAT
GCTCATAAATCCACTTCTCCCTGTGAATCTTTGCCTAATACAGGTCTGGGTATATTATCAATAAACTTTGGATTTAAGGGTGTTAATATGGTAGCAAGCCCCTTTG
GGAAGTTATCGCACAGAAAAGCAAATAGAGAGATTGCACAGAGGGGAATCATGGCGGAAGTTCCACAAGGTAAACGAGCATCACTCACTGCTTAATAACGTACGTG
TGCAACTTCACCAACTCGGCACGTTCGCGCTGCGCGTCAGCGGTTTGCCGCAGCAGCCGTGCTTCCGATTGCAAGATCGACTGCTTCTCTTTGAGCCGTGCCAGTT
TCCAATAGTACCGTATGCAAACTTGTAAATGTCGATGTTATTTAATACTGAATTTCCTTCTTCGTTAATAATATCGCCGCCTAATGGTAATGTTATTGTTCCATTT
GATTATCAATGATAGCCGAACTTAGTTCTTGTTTGGCCTTGTCGAACGCAGGTTTGTTGGCCTTGTCTTTTGGATCTAGATCTAGAATAGGATTAATGATCTTGCT
TACGCAACGAGTAGGTGGAATGATTACAAAAACTTCGAAACGGTGAAGCATGAATATCGCATGTATTCGTTGGATAATTCCTATTCTATTGAAGATTTGCAGGATT
CGATAGATCTTCATATAAGCAAATGATTGCTTTATCTTTCAGAACCGCTCCCCTAACTGATGTCGTAAATGTCTCAAAATCCTTATTCCCTCGCCATTTCACATTT
TGACCAATCTCGATGCCGCCACCACCAGACGGGGCGCGCAGGTATTGTAAATCGGTGCGCTTACTCCAGCCTCTCGATACCGATGAATTTCCATATTGAAAAGGAT
CTGTTTTTTTTCGGAGCCATTAAAATCTCCTCCCATGTGAAAGGTTTTTTAACATTGAAGTCGAGTCCCATCCTGGGGTGGTTTAGTCCCGTAACTGTGCTGTCCC
AAGTACCTAACCTAAAAGATGTATACCGAAAGAACTTTGGTATTTGTTTTATTACACACCAAAGTTCTTTAAGTATGTTAATAGATAATATCAAGCATCAATTCCT
GAAGCATTGAAATTAAAGCAAAGCCTATCGAGAACGAAATTAAAAGTAAATATGAGTGACGAAGAAAGAAAGCTCACAAATCGGAATATATGAAGGCGTATTATCG
AAGTCATTGTACCACTATTGGTATTCTGATTAATATTAGTCACGGTACCACTTTGTACATTGTTATTGTTGTTATTGTACGTGATGGTTCCGCTGTTAATATTATT
ACATCCTCGCCATCCGGCGCTACCGAGGCGACGACACGATGGAGGTCGTGGGGCGGGTGATCGACGTGATCGAAGAGTTCAAGCCCAGCCTAGTGGTGGATCGACG
CGCATCAGGGGATATGAAACCTAACTCTGCCAACTCATCTGCGGCCTGTTTAGCTCCCTTACCTATTAGGGATTCAGCTTGAGCCACATTGATGGCCTTAATAGCG
TGCCGACACCGATTACTCCTTCGATGGCTATGTACATGAAAAGAACGCTCCCTGAATAAGTTGAGTTAAGGATACCATAAGTTTCAATGATGAGGGATGAAAGATG
TCGAGCTTCAATCCTTTGTAGTTCTCATACTGAACATCCTTTCTTCCGCTGTCAGCAACTCCAAAAGAGCCTCGGAAACACCACATCGCATAACCCCATTTGTGTT
AGTGCTTTATGTCCAAGGCATCCAAATCACTGATTAGTGCTATTCCACCGGGGAAAACCGATAACACGGATTAGTGATATTCAATAGGATCAATAGCTTATGACAT
CGCGGACCAGGCCGGTCGTAGCGCCGGATGAGCGCGACGATCTCCTCGAACCGTACGGACTTCGGCGCCTCGTCTTTCGGCCGACGCCCGATCACGCGAAGCGGCG
GCTTCAACCCGAATCGATCCGCTCGTGAGGCGAGCAACCCCATGTCCTTGAAGGCACGCATTGTGATTCTGAACTACAACGGCGAGGGGATGCTGGCAAAGTGTCT
AACTAATACAGTCATAGAAGAAAAGGTTGTCGAGAAGACCAAGGTTATTAAAGGTAAGACTGAATACATTACAAAATATCTTGATAGAGAAGTTATTAAGAAGAAG
TGGATGTTCACTCATTTGTACTACTGAGTTCGTTGCGAAGAACATCTCAGTTCCTTTCACAGTCGCTGCTGTATATGCCACATGATTGAGGCTGTTGATTTGTGAT
GAGATTAATATGGTAAAGCATATAACACAATAATGGATGTATTTAACGATCCATTTCTGATTGGGTTTAGTCGGGAATTCGATAGACTCAACACACTAAAGAAGAC
GAACCGTCGCGAGTTTATCGGTGTTGGATACAAAAAATGTCCGGCGGAAAGTTTCAGTAAACGTACGCTAGTCGCGGTAACGTTCAGGAACTAGGTCCCNCGGGTC
TGACGCTATTGCTGTTGCTCACACCACTAGCCCCTACATCACAGCTTACCCTTGGTCTAGTTCTGGGTTTGGTACTAAGTTCAGCAACCCCGGTACGTTGCCTACC
TGCGGTAGGGCTTGAGCCGCATCTTCAGCGCCGCGGTTAACCACGGACCTGTTGTCGTTGCCGACTCAACGCCCACCTTCACCGTCATGGATTCGCGGGCAACGTT
AGGAGAGGTCGAAGCCTCCCACGGCGAGGGTGATGGTGAGGCCTATACCGATGATGGTGGTGATCGAGATGGACCTCAGGATGGTGATCATGTTGCTGTTGGTGAG
GGTGCTCGAACAGGTCACCAGCCCAGCCGTTTTTGTATTTGTCTCTCGGTTCGAGTTCTTTCATCTGTACCGTCCGTTTCTTTCTTGGTTGACCATCACACGGGCC
GCAATGTTTTCTCTCTTAATAAATACATTGAAAGCATGCGAGGGATCACAATCCTATTTTTTCGGCTTTCGCTTTTATTCTCCTTTATAGTGATATTAAATAGATC
TCCTGCAATGGAATCAGCAGGAACGCGAGTACGAGCGCATCGAGGTGCAGGGCGAAGCGTGGACTGAGACACGCAACAGGGGATAGGAAGGCACACAGGGGATAGG
AGAAAGAATGAAAGATAGAGAAAAGAGAAAGAAGTTCTATGAACTTTAATCGACAAATTGAAGGGGAGAAAGGGGAAAACGAAATACTGAGACACGCAACAGGGAA
GGAATGACTGTTCGACCCGGCCGTCTCTGTAACCGCGTCGGTGGCCATCTTCGTAGCCGCGGGTGTAATCACGGGAGCCAGCAATCATGAAATAGATTGCGGCGCC
CATTTTATTTCCTTTCGTTAGTTCTAACCTAGCATACCCTACCGACATTTATAGGTAGTCGTTAGGGTCAAGGTTGAGATAGTCAATTGCTTTTTCCAACGGCATC
GTTTTATTGATGTTGTTGCTAGTATTGTTGCTGTTATGCTTTGTTGGTGTTTTAATTATTTATTTATGTTATTGTTGTTGCTGTTGTTTTATGTAGGTGTTTTATT
CATTTGTTGTGGGGGTAGTTATTCTTTCTTTACTTTTACGTACACAATTATATACACTTGTTACACTCTTAACTATAATAACTAATTATGAAGGTTAAAAATATCA
CATCCGAATCACCACCGATACGCCGGGGTAATTGAGGCCATGCCAGACCAAGGTGCCGTCCATGCCGGCAAACTCCTTGTGCCACTGGGTCTGGCAACTCAGGAAC
AATATGTTGTTGAATGGGTTAAGTCATCAATGGGTGCGGATGCTGTTGCCTCTCACGAAAGCACTGTTGCAAAACAGATAGCCAATAAGATCAACCCATCAATCGT
TAGCAATCAAGATAAAAAAGAAGATGGGACTACCCAAAGTGGGCTTTATAGATTTTTTATGTCAGCTAAGAAAACCAGAAATTTTAATGATTTGGTTATCCAGACG
GTGAATTTGCTTTACTATACTTTTAATTTTTCCTTTTATAATACATATTCATATTTTTTTATTCAATAATAATCGTGGCTTCTAACGGGACAAGTATTATTTTTAC
TACTTTTTATCTGGTAAAGAATTATCTACTGTTGGATTGCCAAGAAAAGATAAACAATACTATGCAAAAAAAATAATTCGTTATTTAAAAACCTAAAACGAAAAAA
TCCGCAGTTGCACGATACCTTGTAGAACTTTGCGTCCTTGAACTCTTTTGTTAGCATAATGCCCTAGAGCGGGGCTGTTGGTATTTACCATAATTTTCCTTATTGG
TGCTGGCGTTGCTTTTCGTCCACACCCCATTCCCAAAATCCTCCGAATACGTCAGCAGATTCCGCCGCACGTTAATCGCCGGGAGGGACACGCTCAGGGAGTCGGT
AATAAGCAGTGATATCGCCAGAAGCAGTAACGCTGCCATATACGTACAGACCACGTGAACCAGCTTGACCAATTTCTACCTGAGCACCGATGCCAGATTTAATAGT
CACAATGAACAGCAATAATAGTAAGACCTGAACAACCACAAAGCATGTTAGAGTTTTTAGGTGATACCCCCCAAAACAAAAAACAAGATTTAGTATGTACAGAGAG
GGATCAAGAGTTTGATACCAAAAACGCAACGAATTAGATGAATCAATAGATTGACTTGAATTAAAAAAATACAGCTAACCTTACAGGTGTGAAATTTTTGTTCTTA
GCGCAATCAAGGCCGAACTGAAACAACTGGCCGGCGTCAAATAACCCACCAATCAACCGAGGTACTCGTGAGGGATGGGTAGAATCAGTTCGTCTTTTGATTAATT
CATCTACAGCCATTTTAATATCAGAATAACCAGTAATTATTATTACAACCTACCATTACGGATTTATTTTCTATTAAGCTCCACTCGAGCACATTCTCTTGCATCC
GTGGAGGAATTCCTGCCGTACGACGAAAAATGCATCCCGCTGCTGGATCGGCTGGCAAAACGCGTACAGGCGCCGCTGGTCACCGTGCTCATGGGCTGGGAACGGG
AAGCGGAAGTAACGCAATTTGCTTGTGGCACAGTGGCTACATAGCCTACGCCTTCAGTAACACGCTTATACTGCGTTGTAGACACTGCTGGATCGTACACTAATGG
CTTTCGCATGGCACGATCAATAATCTCGCTGACTGCTTGATGGCTAATTCCTAATTCGTCTGCAATTTCTCTTAATGTTTTTGGTTCGTCATCACTCACTTATTTG
CGAAGTGTCGCTGCCGCCCGGCATGGTGCGCGCCGGTCCCGCCGATCCCTGGATGTACACCGTCAACCCGGTAGACAAGCCGCAGCCGTACGATCCACCGTCCTAT
AAAAATTGCGGCAGATCGAAAGACCTATCGCGTAGGAAGGTAAATCTATACGGCCAAAAAGTTTTCTTGAAAGAAGGCCACCGGCATAATTAACCTGGGCGCCATT
AACATGATATTCATATCGGATTCGCTTTTGAATTTGAGACTAGACCAATTATCATGCCCAAACAGAATACAGTTGAATTCGGTTTTGATAAATTCTTTCATGCCAG
CTCTCCTTTTGACCCGGTTTCCGCCGGAAAATGAAATAGTTCTTGAAGAATGGTCGGCATTATAACATAATTCGTTTTAGCGACAACACATTTTTTCCAACCCCTT
AGCCGCCACATTGTTTGTGTTTGAACAACAAATACTACATCTCGAGTGCACGCTGGCTGATGAATAAAAACAGCGAGACATCTAAACGGAAACAACGCATGGCATG
TGATACAGCGAGCCGGTCGACTCACGGGTCTGCGGGTTGACGGCGTAGACGTTCGCGATGGTGAACACGTCGCCGGCCTTGATCGTCGTGGAGCCAAGGCCCGTCA
CAAGAGAAGCAGGAAGTCATGGAAACATTCCGAAGAAACTAAAAGAAAATGAGTGATGCTCAAAAAGGTGAAAAACATTATCTTAAAGGAAAACATCATTCCGAAG
GGTTGACGATGTTTATATGCGGGGATTTATTACTGAAGGCTACAAAACCGAAGGAACAGAAGCCTATAAGCCGCAACTGGCCGCCGATACGGTTTATGATCGCACC
TGAAGTGGACGCTCTCTATCTTCTGATAGATTTGGTGGTGGTTTATCCCCACTTTTTGAGCGGAAAGTCAAAAATAAATCTCACTTATGGAGAGCACGACCAGCAC
GATCGATGGCACGATTGCGGAAACCTATTGCCGAGGCGGCAGGTGCGCGCGGCGTGGAAGCTCCCGATTTTCGCCGCGATGATGGCCGCTGAGACGTGGTTGACCG
CCTTCAACCGCTTCTTTATTTTGCGAATGCTGGTCATGTGTTCTCCTTGATGCCGTGTGCGGCTTCGATTGCTCGGGCAAAATTTTTGAAATTAAACCGCCAGCCT
GGTCGTGGCCTGGTACGACAACGAGTGGGGCTACTCCAACAAATGCCTGGAGATGGTGCGCGTCGTCGGCCATCACGGCACTCGCTGAGTCGGGGACAGAATCCATG
GAGCATGACAGCCGCAGAAATTCAAGAATATGTGCGCCCACCTCTACCGCAAATCAAGTTATTTCCTGCTCGTTACGGGTATACTGAGGACGAGATTACTATTGAAG
GAGGCATTTTTATTTACATTTTGTTTATTCGTAAATCATTCGTATCTTTATCGTAAATTAATACGTATATGATCAAATTAAGAAAAGAGGTATCTCTAGACCCAGAT
CATATCAAACTGCTACTACAGGAATTCTTTCATCCTGTCCAGTTACTGATCTTGTTTCCATTGGTGCATATCTAAAAATTGGGTCTTTGCTTGTTACAACTCCTGCT
CTGTATTATCTACATATAAAATACCATTCATTCTCAGCTTGCCGGTATTTGTTATTATTAATTTACCTCTAACAAAACTATCATCAAATCCGTTTGTTACTCTGCGA
AACTTCGGCCCCCAGTGTGCGGGGCATGGGCGGCGGCTACTGCGGCCAGACGACGGTTGAAGGATTGTTGGCGGGTAATCTGTTATATTGGTGGAGACAAGCCCCGT
CGAACGTGACTGGCGTGTGGGATCCGGAACGCGGTGGCTATGGTGTAACAGCCGAAGGCGACGCCACTGCGTTCAACATCGCCGACTTCCGATCATTCGCGCCCGAG
GTTCGTGATCCGAACGAGGTGTTCGCGTACAGCTTCCCCGATACTACCGGGAAGATCGTCTCCAACGAAGATTCGAAGTTCAAAGGCAAGGTGGTACTGGCGATCGT
GGCTCATGCACGATCAGCGCTAATTTCTTCCAGTTGATCTGGACTTAAATCACACTCACCGCTATCTATCATCTGTTCAACTTCACGAATCAATTGTTTTATGATTT
GCGAAGTATGCCGCGCTTCAGGAATCCATCGCCCTGCTCAAGATCGAACGCGAGAAGTCGCAAGCAATTGGTTGGCTTATGGGCAAGGGCGCAACGGTCGGAATGAG
AAATTGAGTCTGCAATGAGGCAATATCAATGAGTGATTTAAGGAACTTCTGGAACCTGTCTTTACATTTCTAAATAGCTTGACCACCACCTGTAAGACCCAACATTT
ATGGCATCAGATATGACACCCAAGGATCACTTGGTCAATCAACCGAATTGGAAAGACAAGTTCAAGAGTTGGAGCGTAAGCTTTATGAATTCACTGGCGGTGTGCCT
CCCGCCTCTTCCTCCAGAGCACCTTCCGGCAGGAGAAGGTCGGCCTCACCGTGCTGCACGACCAGATCCAGGTGCGGGGCAGCGAGGCCCGGCAGGAGGTGGTCCTG
ATGTCCGAGCGGTAGTTGTACGCGTAGTAGCTCATCGGGTAGTGCCCGTGGGAGATGACCATGTGCGTGCCGTTCTTCACTCCGACGTACACCGCGACGTGGGTCGG
CGCGAAAGCCAGCGGGAGAAACGACATGGCCCCACCAAGTGCTGTTGCGGCGGCCAGAGGGGCCATCGCTGGGCCAACGATTGGAATCATCGCTGTAGCCGCGTATG
AAAACTGGATAATTGCAGCTGGATGTTAATGACTAAGTAAAATGGATGAAAACTAAAACTTAAAAAACAACCTTCCGAAAAAATTCTTAAAAAAATTATTTCAAGGT
AACAATAACATGGCAAGAAACACCAATCNCATATTGTACGTTGGACTCTCAGAGTGGATCAACTATATTTTGGGGATCTGTTGTTAAAATTGATACTGATCAATTAT
CTAATCACAAACTATCATTTCAAATTTTTTAACAACTTTTATTCAACATTTAAAAAGAAAAGCAAAAGCATTCAACAACATAGCTCAATTTAATTTTAACAAAATTT
TACGATCGCGAAAATGTAGATGACTTTGCAGTCAGTTGACTTGAGAGGCTTGTTGGGTTCTGCGATATATATATATATATATATATATATATACATATAGTAGTAGT
TACCTCTAATTAGATAATCAAAGTCAGCATGACCAGCAGTACCTTTCTCAGCTTTTAAATCATCAATAGCTTTTTGGAACTCACTTTTAGTAAGTTCTTTAGCCCCC
CGGTAAGACCTGGGCCGGGGCCTACGAGCTTGCGATGCATCTCACCGGTACGGTACCCGGACTGGTGGAAGGGTCGCCGGTTTCGTTACCCCATCCGCGCCATGTGC
ATATGTGATAAGGGTTAATAAATAATCATAAATTAACTTTAGGGAACAAATAAGTGGCAAAACAAGTTATTAACGTAGGGTCTGTACCTAACGACGGAACTGGCGAT
CGTTAACCTCTAGTTGATCTTTTTTGCTTTTGATATCATTCACTGCTTTTGGAAGCAACGGTTATATCCAAAAGTTTGCACTTGTGGAAAAACGAGAATGGAACTTG
AACGGGTGTTCAAGATGCATCCGTTAAAATTTTATGTAATGATGGTTATGGTGATCCATTACTCATTCGTAGACTAATAGAATCCGAGAAACCGGATGCAATACTTC
GATGCACCAACTAATACTTCTTTTTTTCGTTTACAACAACACCAGAAATGGTTGAAGTTGTAATCTGAGCGAAACTGATGATGGTCATCATACAGCTTGCCAAAAAC
CTCGTTTGCCGCCCCAGCCGCTCCTTCAATGGCGATGTGGAAGCGACGCACTGAGTCTCGAAGGTGTCAATGATGCCGTATACGCCTTGATATGCCTCTACATAATC
GGTCTGTATATGGCGATGGCATTGATGTTGGATGGAAAACAGGACTAGCGGCTAATGCTTACAGAACTGCCGCATCTGTATGGAGATACCAAAATACTGGAATATCT
CCTTCCTTGGTTTTGCGTCATCAAAAGCCCAGTTCTTCGGTGAACCTCTTTTAATGCCGCTTTGAGTTCCGCTATGCGGGCGTCCTTTTTCGCCATTTCTTTGGCAT
ATTGTGAATGGTGTATCATCTACTAAAGTTAATTTAGTCATGTTATCCAATTCTGTGTCTGATTCTTTGCTTCTTGTTTTATTTTTTCGTATTCAGTAAATGAGTAT
CTATATAATTCCGTTAATGCCCGTAGCAACAACAGGCCATTTGACATGGTTTCAAGTCCGGTTTTAGCGGAAAGTTCGGTTTAAAACTTTTTCTAAAACGAAAACTT
CGTCGATCACCACTAGGCTGGGCTTGAACTCTTCGATCACGTCGATCACCCGCCCCACGACCTCCATCGTGTCGTCGCCTCGGTAGCGCCGGATGGCGAGGATGTCG
GTCAATGAATGGTGCTCCTACCTCTACCTTGGCCCAGACCTGCTCACCCTTCCAGGTTTCTGCACTGTCCTGAAAGATATTGTCCCAGGCACGGACCTGGCTAACTG
TACTACAGCACCCTCAACGCCAGCATTATAGGCTATTGTCTTTAGTGGTGTTTCTAAAGCTCTTTTAACAATGGAAATCCCTGTCTTTTCATCTTCATTTACAGTTT
AGCGAACGCTGACGGTGCTCGTCATCGATATCCTCGCGCCGGCTGTCTTCATCCATATGGTATATCTTCAGCGACATGATCGACATCCGGTCGACAATGCTGCCCGG
AATGTTATTGTTTATTGTTCTTGTTTAATGTTATTGGTTAATGTTATTGGTTAATGTTATTGGATAATGTTATTGGTTAATGCTATTGGTTAATGTTATTGGTTAAT
ATGAACGAAGAACGAATCCAACCTTACCTTGAGCATTGGAACACAAGACTTAAGCGTAAACGGGAAAAGGATTACTACGATAACAATATTGTAGTTGGAAATATGAC
CAATCATTTTCTTAGCCGACATTGCCATTTCAACAACTGATAACGCCATTTCAACACCGTGAAATGCTTTACGCGCTGCGGATTTTTCACCAAATAGTTTTGATGTT
TCGCCCACCGTTGATTGATAGGCGAAAATGCCGTATTCTGCGATGTATATCGGACGATCGAAAATACGCTGGGCTTCCAGCCACAGAAATCCAAAACCCTTTTCACT
CCGTTGGTATCCAGCTTGACCGTGTATTGCGAATAGAGTCGCCCGTTGACCTGCTGTTGCGCGATGAACTGCTGCTCTAGGGCGGTACTACCGCCGGAAGTCCAGGT
TCCGTGGCGGGGGCACTGACGTTCTGGTAGGCCTTCAATTCCCAGTACGCATCACCTAGCCCGGAAATCGTGACAAAGCCCGCCACTGCATACGTCGCTTCCGCCGT
TAAAAGCAAAACCGACTTACACTGCAGGAACAACAGGTATTCCAGTCACATTTTATCAAACAAAAGAAGATTACAGTTGGATATGGGCAGCACATTTTCGTGCATGG
AGATAAACACATTAAACATGACCGCGATCTATCACTCACCTATGCTGCGATGGAACAGTTCCGTGGTAAGTATTCTAGTAAAAAATCGTGTACAGGTCAGCGTGTTC
CGTGCTGCCAGATCATCACCAACCCGGCCCTCGTCGGCCGCCTTGAGCCCGGCGACCCCATCGACATTCTCAACCAGCAGCCCACCCGCTTCTGGAACATCCTGCGC
CAGGTCCTGCTCTTGCTCCTCCACCTGAAACAGAACCAGTTGATAATACGCAAGATTCCGGTGGGGCAACCGAGTCACCTACTCCGCAACTCGATGCACAAGTAGAT
TTGAATTCTTGAGTTTTGAATTCTTGAGTTTTGAATTCTTGAGTTTTGAATTCTTGAGTTTTGAATTCTTGAGTTTGAATTCTTGAGTTTTGAATTCTTGAGTTTTG
TAGTACCATTGAAAACGGAAATGTATCTTGGGAAACTCACAATACGTATTTTTATGATACTGTAGGTGATTACATACAAAATGCTAAAGATTTATATAGAGGTAGAG
GCTACTCTTCCTGCAACAAATTTCCTGGGTGCTGGAGCCACGGCTGCAAATCTTCCGCGCTTGGGGTCTGCTATTACTTCTGGTGGTATGGCTACTGGCTCAAAAAT
AAACTTGTTTCAACCCAACTATAATAGGAATTAAGTGCATCATTATGAAGTTTCATTGGTTCAACTAAATTAATTTAGTAATTGGGCAATTTTTAATTAGTGAACTT
CATTTCCATTTGATTCTTCTCCAGGTGTATACTTTCTAATTACTTTAACTTTTTTTAGTTCATTGGTACGGACTACCATCTGTAGTACGTTCTAATCTAAAGTAAAT
GGCTCATGCACGATCAGCGCTAATTTCTTCCAGTTGATCTGGACTTAAATCACACTCACCGCTATCTATCATCTGTTCAACTTCACGAATCAATTGTTTTATGATTT
GGTCGTGGCCTGGTACGACAACGAGTGGGGCTACTCCAACAAATGCCTGGAGATGGTGCGCGTCGTCGGCCATCACGGCACTCGCTGAGTCGGGGACAGAATCCATG
GATCGATTGTCGACCCAACAATTGAGTATAGATTTGGATGATATTTACCGCTATTATCAACTTGATACACATACGCATTTGCACCGGATCCGCCACCACCTGTGATT
GATCTTGGCCAGGATGGTGACGGTGGGTGAGTTCTTGCAGAACGTCACCGTTTGCGGCACGGAGGCGGAATACTTGCACTTGCCGGAGCGATCCGCGCGGGCCAAGG
AGGTGATCCTACCGTAGATAGTGAAATACCCATTCCTGACGATACGGAATGGTATAGCCTGCATGGGCAGGCCACTTACGTCCTTCAGTACAAGAACAAGTTCAACT
TACGTTAATAATATTCGATTGTCACAATCAATTCTCTTGGAATTTTGTGAAAGAGAGCAAGCTAAAGTGAAAACATACCCAACAATAACTGACGCAATCACAAATTT
GCTACTCTTCCTGCAACAAATTTCCTGGGTGCTGGAGCCACGGCTGCAAATCTTCCGCGCTTGGGGTCTGCTATTACTTCTGGTGGTATGGCTACTGGCTCAAAAAT
TCCGTCAAAGGGTCAGGGATCTGGAATGTAGGTTCCGGGCTAGCACATAGTTTGTTAGATATTGCTGAAGAAATTGCTGCACAAGAGAATGCAGAAATACTTACTTC
ACTCCGGCTGCATTTACAACCGTCATTGTTTCATTTACAAAATTTAATTTGTAAACATCCTGAAATGAAACCGATGTTGTTGTTCCCGATTCGGCTTTCACTATTAT
TACAAAGCTATCACGTCACTTTCATAGGTTTCATTTTGAGTTCCGTTTCTTTCAGTCTTTCTCTGGCTCCGGTTTTTCCTGAATATTGACATCAATTTAAATTTTNG
TATTCCAGATTTTTCCTATTCTTACAAACAGGCGGTTGCCGAGGATGTTTGTCGTCGCGTTTTGTTTATCCACGATGACGGCGTGGCGGAATACATTCTTGATGAGC
GGAACACTTTAGGACCGGGAAGACCGAAAGGGTACGGTAACAGTGGCTACTCAGGAAAAAAGTAGTTTAATAGCACATATAAAGAGTCAGGTGCAGATAAGTTTATA
CGGCCGGGCAGAGATGTACAGTAGCATATGTACAGATATATATATTCCCGAATAAAATGGTGGCCTCGTTGTGCAAAAAAAAAAAAAAAAACAAAAACATGTCGGCC
ATAAGTTAGGAACAGTATGATACCATAGTTATGCACGCATACCGTTACCCTGACCATGACCGTAGACCATCTCAATTTCGTGTTCACTAGCAGGCGGTGCTCCCGTT
GGATTATTAACAGATACATTATCATTTGTTGGTGGAACAGGTCTTACATCGGCAATAACAAATAATACCGTAACATTTGATATTGATTCAACTGTTGCTACATTAAC
TGTGTGTGTGTGTCTTCGTGTGTGTATTCGCAGTATCATTTCAGCAAAGAAGAAGTTTGGAGGCAACTGGACTGCTGCTCGAGGGTCTTGCTCTTCATTGGCAAAAT
GATTTTCCTGTTCAAGCGAGTGGAACCGCTGTGAGCCTCAGTCAGTCCCAACTTTTCAGCGTCAGTCTTAGGAGGCCTTACGGATGTTCCACCCGTGAGGCCTTCTG
GTAACACTCTTTCTCTTGTCTTGAAAATTCCATCATGTCCTGTGAATTGACCTCCGTGAGCTTCAGCTAAAATATCACTTTTCATGTTTTCAGGCACAAAAAGGACT
CAGGCGCTTTGATAATCGGAGTCGCAGCAGGATGGACGACGAACGGATGGCGGCTGACTGGTCAAATCGACCGCCTGAAGGCAGACCATAGTCAAGCCCTTGCGATT
TGGAGTGCTTTACGAGCATCCTTGAGCATTATTTTTGGTTTATCCCCCATCGGTGCGGCTGATGCCGTTGAGCCAGTTTTTAGGGACACTCTCTTTCCCACCAATAT
ACAAATAATCCAATGATTGTTGTTATTTACTTAGTAAACGAATTGAAAGAATGGGATAAACATATAAAATTGCATCGAAATTTTAGTAAGTCTATTCCAATTAGCTT
TGTCGCCGACGAGACAGTTCAAGCGCGCTTTACCGAGCTGCTGGGCGAGCCCAAGAAAGGCCAGGAGCGCGTGTCTGTCGGCGACGAGCTGCGCAAGGCGGGCAACG
TATTCCGACAACAACTATTATTTCCTACTACGCAAGCGCTAACTACTATTCCTACAACAACTATTATTCCTACTACGCAAGCGCTAACTACTATTTCCCTACAACAA
TAATAAAAGATTTCTTTTCATTTGTAGCTGGTCTGATATTGAAATGGGATGCTTTTAATTAAACATCTACCTTCTTTGTTTTCATTTCAACTTGAATCGAATTATAT
GGTGCATGCGGCCGCCATCTGCCTTTGTCCGTTTGCCCATCAATGGCGCAGGCGCCGAGCCATCTTGCGTTTCCGATGACCAGCCATCCTTGTTCATCCGTTGCATC
ATTGTGAATGGTGTATCATCTACTAAAGTTAATTTAGTCATGTTATCCAATTCTGTGTCTGATTCTTTGCTTCTTGTTTTATTTTTTCGTATTCAGTAAATGAGTAT
GGGTTTAAACTTGATCTTACAAAAATGCAAATGATTGGTATGCAATGGTCATGGTACGCTGTTGGTTTTATTGATTATATGTTTAAGAGGAAGTGACGGTAATTTTA
CAGGCCCACTTCTTTCTAGCGAGGCGCAGGCGGCTTTTCGGATCCTTTGCGGCCTCTGGGAACATCTTCATCTGTCCAGCAGATCTGGCACAAAAACTCTTCTTACG
CATTCTAGTTTATTTTCTATGAGTCCTTTACACCCTGTTGTGTTGAAATAACTTTTAAAAAGTCTACTTCGATAACAAAATGTATTTTATGATCAGAGAGCGGTCGC
AGAGTGGAGTGCTATTCTTCTTTCTTTTACAGTTGGAGTATTTTCTCCTTCTGCGTGGTCATCATAATCTATAACTAAGAAGAGGTGGTGTTCCAAAGGAGATGCGG
ACCGCCTTCGCGAATGGCGAACTTCGATCCCTGTTCCAACGCCACAGGCACGATCAACTCAACCGTCAGGTTGACATTATCACCAGGCATCACCATCTCCACGCCTT
CGAGTTAAAATGCAACAAGGTATACATTAGAAGAATAACAATAAAAGGTGTAATTAAATAACTGCTAACAATAACGTGTTTTTTAATTGATTTCTATTAATAAAAAG
CGTCGATGCTGAACGCGGCAACAGAAGCCGAGTTTGTGGCAACCGAGGGGTTAGCAGTGGTGGCTGTAGCAAACGAACAGGCAGGGCGTGTTGCGTTACTGTATGGG
ATGCCACCGGTGACGCCAACCCGCTCACCTCGGATGGTATTTTTGTCTACAACCTTTCAGCTGATTCTGTCAGCCTGGGCGACCTGGTGAGCGTGACCGGCACCATT
GTGGACGTCCAGACATCAGCAGCAAGCGCCGATATAAAAACGACAGCCGTGCCAGACAGGCTCAACAACGAGCCAGTGCTGGATTGGCCCAGAGTGCGGCTCAGCGT
AATAGATACAATGCCTCGAAACAATGCAAAAAACACCTTTTTAAATCAGATAAAAGGAACTGCAAAACTCTTAAATCATTTTTTTCGTCCCGTTTTTTTTTTACTTG
GCAGAAGGAAGGCTGTATTTTGAATTACAGCATTATTTATGGGACACATACTTTAACGATAATGCTGCTTATGCTAATCTACCTATTGTTGGTGATATTGTTGTTTT
AGTGCAAGAAGTGTGGCACAGGAATGTACAAGATATTAGGAATGAGTAAATAAACTCATTCAATTTTTTCTTTATATTATATAATTCATACTTTAGGCCCATGTTCG
GCGCGACTGTAATTTACAGCACAACCGCACGAACCAATGTGGCTTACCGCGTGATCGGCATTATCCGAAGCACGCAGGCAACGGCAGGCACTTGGGCGACTGCGCCT
CATCGCAGGCGTGACTTGCCCGACGGCCACGGACACAGACACCATCACCCTGAACGGCTCCACCACGGGCGGCATTCGCGGCTCGCTGGTTGAACTGCAGGACGTGG
CAGGCCCACTTCTTTCTAGCGAGGCGCAGGCGGCTTTTCGGATCCTTTGCGGCCTCTGGGAACATCTTCATCTGTCCAGCAGATCTGGCACAAAAACTCTTCTTACG
GTGTACGGTGTATGTAACGGTAGAGCCCTGTATTATGTGTGCGGGTGCTCTGGGTTGGGCGCATATTTCAACGCTGGTATATGGTGCCTCCGATGAGAAACGGGGGT
GGAATCTTCAAGACAGCGGACAAAACACCGCGGCGGCTTTTCTTGTCTTGGTGTCTCTCGCTTTGGCTTTTGTTATACAGATTGAGAAAGGGAAAAAATGATTACTT
GCACTTGACGAGCTGGAGCATTAACCATACCCATGTTAGGAGCCATTTCGCCAGTTGAACCTGTTACAGTTGTAGGTTGTTGAGGAGCTTGCTCTATTCTAGGCTTT
GGCTTCTCGCAGAGCAAGAGGACGGCGGCGACAAATGGCACCTTTTGAGCTTGCCGGCGATTGACAAGGAAGGTCAGCCGCTGTGGCCTGAGTGGTATCCGCTGGAT
GAGGACCACTTTCGGCATCAGAGCTTTTAATCCCAATCCAACACCGAAAAACGGTGTGAACAGGAAAAGCCCAAAGATGACTGCCGCAAGCACAACCCAACGGCCCC
CCATTAGCAATCCTCCGCCTGACATAAGTACGTTTGAGGAAAGAGTGTCGAAAAAGTCGAAAATATTGGAACCAAAAATGCGTACATCGGCTAATATTCCTTGCGAC
CGAATCGTTTAAAATACTTCCTTGATCATCAAGGACTTCTATTAATTTCTTTTTCACCAGTAAGTCAACGGCAGAAATTATTGCTCGTTTAGAGCTACCAGTTTTTT
GAATTTTCGTTTCCGGCGTGGCCGCCCGCAGCGGCAGCACAACCAAGGCAAGAAAGGCGAATGTAAATGCGCGAATGGCGCGCGCGGCGGTCAGCATCATGCCGATC
TAGCAGTATGCCTCGTACTCTTTGCAGACGGATTCTTTGGAATCTGGGCAGGAGCAAAACACTACGGATTCCAGACAAAAAAAGCTTTAAAAATACCTAAAGCACTT
GCCTCCGCCCGCCCCAGCCCCCCCAAGAAGTGCGAGCCCCCCCGCCCCCGCCCCGGAACAGCTCACCCTGAGACACGCAACAGGGGATAAGGCACACAGGGGATAGG
AAGTCCTCCGGACGCGGGTGGCGGAACTTCCAGCGGTCGTAGTAGGTGGCCATCACGCGCCGCATCGTCGGCCAGCCCAGATGACGCTCGAGCGTGTGCATCCACAG
AGAAGAAGCTTTTATCAGTTGCTAAAGCGGAGAAGGCCATCAAAGCAATAGGCCAATCCCCTGAAGTTATTTTGTCAAACTTAGTGGAGAAACCAGTAGGCGAACCC
AAAAACTGATTACTTCGTTAAAACAATTGCGCGATGTAGGAAATTCGATTTTAGTGGTAGAACACGACAAAGACATGATAGAAGAAGCCGATTATGTAATTGATATT
CCAAGGATTAAGAGCGAAGCGAGCGTCCCGTAGATTTGAGTCGGGTGACGGGTCGTATTCCATAAATCGATTCCCCATGCCAGATTGGTTTCCATCCCAAAGGCTGT
GATAGCCTTTTGCAACGAATACGAAATAAAGGCTGTGCTTGACGCAATCGAACGGCATACGGAGAAGCAAATGAGCAATGATTACGATGCTGTAGGCGATTTAACCG
CCTGCGGCCCGCGAATCAGGCGCAGTGTCAGCACCTCGGAAAAGCCCAGTGTGCGCGCCGCCTCGAGCTGCGCGCGCGGCACTGCCTCGAGTGCCGCTCGATAGATC
TATTCCGAAATAAACCAGCAGACGGGGGCGCATAAGTATTACCTGAACCGCCGCCATCTCCACCGCCCCCACCCCCGCCAGTACCACCATCACCACCAGCACCGCCG
GACGTTACAACGGGTAACTCAGAATTTGAGGGATGGGGAACAGCGTTAAAGCCCGCTATGGAACTGTGGACTTTATGCAGAAAGCCACTGTCTGAAAAGACCGTTGT
ATGCGGAGAAAAGATACAGCAACAGGTGCTCGACCCCATGCTCGGCGCGGGGAAAGCCTACGCTTTCCTGGAGGCGAAGGCCGAGCTTAAGGTCTCCTCCGAAGAAG
CGCATCAGGCAGTATGGGAAATAGAAAAAAGAGCACTAGCGAAGGTTAAAAACTTTTAGAACTTTATGACATTACAACTGAGGATTTGACACAATGAAAAAACTACT
CATCCGGCGCGCCAGCGGCGGACGGCTGGACCTCTACTCCAAGGCGGCGCGGGTGGTGCGCGGTCTGAAGGACAACCCGATGCCGGTCGATGACATCATCAAGTACG
CGATGCACCGCTGCCAGAGAAAGCTGTTGCAGATAGAACACCAGTAGATGGATTAAATGTCAGCTTAGTAGAAGAAAGTTTAATTGGCTTGTCGCCAGATGTAGCGT
CAGCCCAATTACTATAATACTCACGATTAAGTTTAGTCCAACTATTAGAATTAATTTTAGTTTCATACACAATATTATCTTGCTTATAGTGACCGTTAAACCATCTT
GAACAAGTCTTACTAATGGATTGAATACAAACCGACTCAAGTAGTTGGATATAAAGATACTGCAACAACCGCTATTGGTGGTAATGCCGTAAAGAAGTTATTATTGC
GTTTTCATCTTCTGCAAGTGCAGCGAAAAATGCTGGTGTTAGATCACGACCTCGGCTGGAACCGATTTTACCGAAAAGGTCTAGGACCTTGGAATCGGAGGTTTCCC
TCCGCGAGGCCGCCAGTTGATTGATTTCGCGCAGCCGCGTGCGGGCCAGCGCGGTGTTGCCGACGGCGTTGGCGGTGTCGAAGCCGAGCAGCCGAAGTCGGATGCTG
AATATCCAAGGAAAGTGACTGAGTGAAACTAAAAAAACACTGGACTGAATATAAGGAGCTGAATTAAATAACTGTGGATTAGAACCAGCTAGAAATGACATCCTTGT
TTTCGCTAGGTTCCGGGACGGTTGGAATAAACGGGACGATTTCGGTAAATTATTTTTGACTAAAAGCGCAAAATCATATATAATAGAGTGGAAATCAAGTTGAATCG
GGTTTTGCCATTTTGGAGATACGCCGGTTTACGCTGGATTGGACTTGTCTGCTCGTACTGACTTAACGGCACTTGTGTTGATTGGCAAGATTGCTGGCGTATGGCAC
CAATTAATGATCAATTTAAATGAGGAAAACTTCAGTTTAAAGCATTATTCACCTAAAAAATAGGCAAAAATACAAAAAAGGGAAAATCACAAACCTGAAAAGTCAAC
TTTGCTGCAAAGTTTTTTTTTGGGGGGGTTTAGTGTGCCGCGAGTCAAAAAAGGTTGGGAACCACTGCCCTAGAGACAAAGTGATTACGTACTACGTAAACCCACAC
AAACTCAGATTCAAACTTGATCTTTTCTGCCTTTAGCAGAGATAGCTTCTTGATTTCTTCCTGCTTACGATTGACAAGTTCCGTTCTCGTCTTACGTTGCTGGTCTG
GCATGTGGAAGACGCAGCGCACCCCAATGAGCGCTACGGCGACTTCCTCAACAGGGTCGGCAAGGACGCCGTCGATGCCTTCTGCTCCAAGTACGTCCCTGGCACCG
AGCCGAAGTCGTAAATCCCCACACCCAAGGTAAAAAACTAAGTCTCTTTTTCCATAAAGTCGTATAAAAAAATCTTTAGACTTCCACAAACGATAATAATACTAATA
ACAACAATACGTCTTTGCGATCACCGCTTAGTACTGCACCTTGTACGGCTGCACCGGCAGCAACAGCTTCATCTGGATTAACATCCTTGCGAGGTTGTTTACCAAAT
TGACTATCTTCGAGTAATTCGTGCCAGAGTAAAGCTCGGCTGGGAATAGCATTTTTTTCTAAAATCCGGTATAGAAAAACAATAAACAAAAGAAATATAGATAAAAG
GAATAAAGCTCCAGAATCATAGAATCAATCAAAATCGATCATAAAATTTGAGAAAAAATTCATAGGCCTAATTATTGATGTTGTTGCTGTTGTCACAAACTGCCGAT
TAAATTAATAAAGAGTATTCAAATAAACTATTTTACAGTATTTTCTTGCAACCCCAAGTAAGTCTCCTTTTCTGATTATTAATATACCAAATCAAACTTCTTTATTG
CAAGTTCTCTATTGATGCACTAGATGGTTCGGTGTCTATCAACGACAATGAGTTCTCTAGCAAAGATGTAGCGGCTAAAGCCCTAAAAGCAATGTCTGACTTCTGTC
CTTTTGTAATTGGCAATGCCATCCAGGTAAGGTCGCTTCTGTAATAAGGCACCTTTTTATTGTCCACCCGTATTTCCCATCCGGGGTAGAACACTTCGGCTAAGCGC
CAAGTTCTCTATTGATGCACTAGATGGTTCGGTGTCTATCAACGACAATGAGTTCTCTAGCAAAGATGTAGCGGCTAAAGCCCTAAAACGCAATGTCTGACTTCTGT
TTAGGGTTATGGGAGGAAGAAAGGTACTTAGCAACGGAAAAGCGTATAGATTCGATAATGGTAGTATGATTGAGTTCTTATCTATCGATGATGCGGAAAGAGAAAGG
TGGCTCCATTATAATGAAGCTTGCCGCCGAATACGGGGTGAACATTCTGCCTGTTGATTCGGAACATTCTGCAATTTTTCAATGCCTGAAAGGGGAGAACGTAAAGC
GTCTGGTGGAGGAGGGCTCGGTGGAGATAGTGCGCAGAGGAGAGGTCAAGCATGAAGTGATGGCGGGACACTACTTCGGAGCTATTCCGATGTTCAGTGGAAAGCCT
AGTGCATCCCACACTTTTCTTAGTGTTGCTGGATTATTTGCTGTTTCTTCGATTAGCTGATTAGCAAACTTTTCTTGCAGCTCTTTGCTAAGAACCGTTGTGTTTGG
AAAGCATTCGGTGGCGAAGCTAAAGCATACGATCAGATCGATGCTGCTCCAGAAGAAAAAGCACGTGGTATTACGATTAATACAGCACACGTTGAGTACGAGACAGC
TTTTCCTTCCATTGTATGGCAAAGCACATAACCATCGTAGGCAGCTGAAATAACAACCCTTTTACCATTCTTACTGACTGTTGCCGGCTTAAGTTGATAAATCGTAT
GTTCCCAGCAACAAGTGGCGCAACCGGCGCTGGGCGACGCTGATCTTCGCCAACCTGCTGTTCACCTTTTCCTTCGTCCTCGACATCCAGATTCTCGAAGGCGCGCT
TGTATTCTTGGCGTAGTACATCGTTTCTTGACCGACCTGCAAAACGCTTCCGCCGTATAACCCGATATCTACCGTTCCGTCATCGTCGTTCCATTGAATGCGGCGCT
GCGAATCCTTGCCGGTAATGCGCGTCCTGGATGCCATAGCCGAGCTTGGCAAACTGACGGGCAAACTCGCGGGGGCTGGCATCGGCGGTGGTCTTCACGTCGATCAG
TCGACGAAGTAAGATATCGGATTGATCACCGAGAAGGTATGGAGAGTGTTGTCTGTTTATGATGGGCTAGAAATAGGATCGACAAGCGAATAAAGATTGAAGTAGAT
AACCACCAACTTTTATATTGGCAATAACAACCAGTTAATACTACCAAGTCTAATTTTAAGTTTGTCTATTCTATACTCATCTTTTTTCGGTTTTTTAAAAGTGCCTT
TGGGCCGGACCGACGCTGGCGACCTGATTGGCCAGGTCGTTAGCGTAGCCCTGGGCGAACTCGCCGACGGCGGTGCTCCAGTCGGTCCGCCCTTCCATCAGGTCCAT
CGCCGCAGCAAAACTCCAAACTGCGGCTCGCCTTCCTCCACGAGCACGCGCCCGAGGCGATACGCGAGGCGAGCCGGCAGTTGCTTTCATGGCGGAGCGCGCGCGCG
AGCTCTGAGACATTTCGGGTCGTTCTCGAGTTGCAAGCATTTTAAACAAAATCTGTCGAGGTAAAAGTTTGCAAACATATTGTTGAGCAGTTGGAGCTCAAAAACAG
TTCGGATGGCCTATTACCATCAGCAGCACACATTAATCAGAACCCTGATTCAGACCACAACTCAGGTTATGCAGTTGATCTAACCCACGACAAGTTGGGTGGTATCG
AGGCAAGAAGTCACGCGGTAGGCAACAAGCTGCGGCGTCCGAGACGAATATTCACGGAAGCAGACAGACAAGAAGTCACGACGTTAGGCAACAGGCTGCGGCGCCCG
CGCTGCGTCGTCTGGTCAGCGAGTTCTCCAATTTTGCGCGGTTGCCACAGGCCCAACTGGTGCTGTCGGACCTGTGCGATTTCCTGAAATCTCACCTGGCAAGGTTG
ATGAGCCAAGATGATCTCCTCATTACATAACTGGCAACGAAGGGTCAAGTGCATGAGGTTCATCCATTGACCATTAATGTTTACTTCTACCAAAAGACCCCACTTAC
GGTCAACTTTTGAATTTTTGCAGCATTTGATGTGGAATAATCAGACATTAAATAATTTTTAACTGTTACAGAAGAACCGTTTGGCACAGTTTCAATGAAATTTAATT
TTTAATGCCGTCGCTGTTTCAGATTTTCCACTTGATCTTTCATCAAGGCGATAAGCGGCGTAACTACAATACAAACACCTTCCATTGCCAAAGCTGGCACCTGAAAC
AAATACTAAATCATCTTCTTTATATTGAGTATCACCCCCGTTTGTTATAATTACCCTGTCTTTGTAATGTACCATTTTTCGGGTGGTAAGGGGAGTAGTGTTTTTTC
CATCTTCTTCAGGAAGCTGGAGATCAGGCCTTCGTCGGCCGCTTGCTTACGGTGGATGCGGTCGTGGTCGTCGCAGGCTCGATCACCTTCGCCGTCTCGGTCAGCTT
GAACCGATTATTGCGAGCTTAGCCTGCTGCTTCTCTTTCTCAATGACCTGTTCAATGGCCGCATACTTCTTTGTGATAAGAGAAACGCTGGCCCCGGTCTTGAGCGC
CATTATAAAATGTACCATAAGGAGAACCCGCACCACCACCTACTACTAATACTTTTGCATAGTTAGTAGAACCTGTTGTTATAGTAAATGTTCCATCTCCCGTAAAT
GGTGCTTTGTTAGGCGATAGAATTCGTATGAATGCGATTAATAATTCTCGTGTTTATATGCGTTCGTTGGCTACACGTCAATCTAATTTGGCTTTATCAAAATATGT
TGCTGCAAATACCCCAAATGCCCGAAGAGTTATGATACGGTTTAACATAGTAATTACCATTTCCTTGCGCACTATTGTTACTGCTAATAGTAATAGAAGATCCTGTT
ATATTTGGCAAACTGTTTCAGTTTATGTCAAAACTCGGTGGACTGTTTAAGTTTATTGCGCCAATCCTAGGAAAACTCGCGCTCCCAATAACCATTTTATATTCTTT
ACAAAATGAAATAAACACAAGAAAACATGAACAAAACAAAAAATCAATATCCAAAGGATGTCAAACAGACATACCAAAACAAAAAGAAATAGCCACAAACAAGCAGG
GAGTTTCTGTAGCGGTATTGACTCCGGTTATTGATGTCGCGTTACCGCCAACTATTACCCCAGAGACACCTGTCACACCAGAAATACCGGAAGTAACACCGACACCT
ACTGGTCAAAGATGTTTTGACATCTTGACGTTTGGAGCAACGGCCGGTGGCAATGTAGATTTCGCTGTTGTAAGCAAAAGCCTCATGCACCTTACGCATACCCCTTG
CGTTTGCGGTGAAAGATTATGCTCCATTGCAAAATCCATGATGGTTTGTTCACTTTCTGACGGCCTAAGCACTACAATGTTTTCAATTTTAAATTGCGGTTATCACC
ACAAAATGCGCGATGCTGCATTCAGCAGACAACGCTATTGGGGTGAACCATTTCCAATCGTTTGGAAAAATGATATTGCATATCCGCTTCCCGAATCTGCATTGCCT
AATGGGTTGGAATCTCCCTTAGTTTTGCAATCATTCAATGAAGAGCAACCTTGTCTACTGCCGAAAAGGGCTCTTATACGTTATAGTTATGGTATCTTTGCGGAAAT
TAGTATCATATTCGATCCATTCTGCAGTGCCTGGTGTAGCTGTTGATGCTACTGCTAATCGAATAGATACAGAACTAGTAGTTGTATTTGTCATTGACACGTTAAAC
TGAAGTTAGAATAATTTTAACCAATGTTCCTTCTTGCATAATTTTAATTGTTTTATTGTTTAATTATTTAATGATGAATCAAAAGTAATACATTAAATATTAATATC
CAACCTGGCATTAATATAGTCTGTTTTTTGTTGGTCTGAGCAATATAATTTAATTTAATGCAATAATTAGTTTTAACTTACTTTAGTATAATGATATAATATTTTAA
CTGTCAGCACAGGGAGTGGCTCTGAAGTCTTCATCGCAGGAGGCGGCTTCTTCTTCAGCGGAGCAGGACTGGTTTTCGCTTTCTTGCTCCTGTGGCTCGTCAATGTC
AGCGCGGCCAGCTTCCTCCTGTTTCAGGCCGAGAGCGCCGTCTCGATACGCCTGGTCGGCGGCGGCGCGTTCACGGTAGGCCGCGATACGCTCTTTACCCAGTGCCG
CAATGCTTGGCGCTGGCGCTGGTTTTGTCGGTGGCGGAAATAGCCAAGACATTTCGGCTGGTGCTGTTGCCGGAGCTTTGTTTCAGCGTGGCGCGACTAAAATTGAT
AATTCACCATTTCTATTCATTCTTATTTCGATATACTTAATAGTTTCGTTCATTTCACTACATACTAATATATTTATATCTTTATATCTGTGAATACTGTATGAAAT
TAATGTTTATGTATTGATATTAGTGTGGCGTAGGTTCGAATCCCTCAGACCCAGAAGGAATAACTGCTCAAACCAAGTACCTCGGCTTGGTTGTACATGCAAATGTG
TGACCTGGACTCTGGCATCCTGACTGTCGGAGTCCAGCGGCACCCGAAACAGCTCGCGCTCCGCGTCGTTGGCATCGCGAATGGTGTACACGGCTGACGTCCCCTCG
ATAAATATATATTCGAACGTGTTTCTTTGTTTTTATGAATTCGCAGACTGTAAACAAAGTTGAATTTACCAAGTCTAGCGATAGCTGTTTCTTACGTAGAGAAAAAT
GTTATACTTAATGCTGAATCTTGTGCTAATACATCTAAACTAATTGAAACATCAGCTAAAGACCAATCAACATAATCAGTTGTTGTACCTGATGGAACTAAATAAGT
GATCGACCTGCGCACCTTGAAACGGTCAGCACGGCGTAAGTTGGAGGGCAAGACCGAGTGGCAAAAGGACCAAATGGTCATGGACGCCATGCTGGTGCTGGAGCAGG
TCTGATTTATACGATGCGACCGAAGCGGTTCAAGTCAATGAGAAGTCATTTGTTAAATATGGCTTTGAATGTTTTGAGGCGTTTGATAACCCAGTGGGAGGCAGTCC
AAAAGAAATAATAATACAAACTTTCGAATAAATAAAGCTTAGAAAAGTAATCTTAAAATGAACTAGACTGATTAACAATAGCAAAAGAACAAATACATAAAAAACTT
AAGAAGCCCTAATATTTCCTGCTAATGGGTCTGTAGTGTTACCAATGGAAACACCGCCTGAAGTTAGCAATAACGCATCCGTTCTGTAGAACCTGCGTTTGACGGAT
AAAAAATTGCGGCAGATCGAAAGACCTATCGCGTAGGAAGGTAAATCTATACGGCCAAAAAGTTTTCTTGAAAGAAGGCCACCGGCATAATTAACCTGGGCGCCATT
TGTGAAGAGCGGGGCGATGATCACGGTGGATTATGCCCTTGAACAGGGCAAAGAGGTCTACTGCGTACCCGGGAATATTTACTCCGCTTACAGCCGCGGAACCAATT
GTCGTAGCCTATCGTACCCAATCCAGCGCCTCCTTGACCCTTCCAGCAGACGTTTATAGGGGTACGGGCGCCCTGACTTATCTGTTGGATGCCTTCTGTGTTTGGAG
TGTGGATGTAAATAGTAATTTTAAAACCGTGCAGAATATCGGCAGAGTTTACACAATTAGTGTCAAAATTGGCAATCAAATCATAATTTCGGACGATGAGCCGCCAC
GTTGTTGGTGGTGATGTTGTTGATCTGATTGTTTTGTTGTTGTTGGTGGTGATGATGATGGTTTTGTTCTTGATTTTGTTGTTATTGTTGTTGGTGGTGGTGTTGTT
CAATCCATTCCAAATTACCTGGCGTGGAGAGCCGTGGGCACCGGCTCGCGAAATCATTATTAATCACCATCTCGACGCGTGGTGCACTGAAGACGAAGACGATTACG
GGATGTATTCCGAGAGAATCGTGACATCTATATCTCTACGGCGGCCAATATGTTTCATGTGGCCGAAGAAGATGTCGATAAGCACCAGCGTTTGCTAGGGAAAGTAG
AGATGTCGTGTTGGATGTTCGTCTTAGCATCGAAGTATTGACCGTCTGTGTCCTTGCCATTCAGCGGCCCGCCGAATGGAACTAACAGAACATCTAGCACCATATCC
GGTCTTCGGGAAGGGATGCATGCCCTGTCAACTTAATTAATCATGAAATGTCGATTTTGTGTATGCCTGTATGTCTCTTCTTTTTTTGTANCTTCGGTAGGGGAAGT
GGATCGTTGCAAATGCTTGATAGACCGCTTGCTTGCCACCATTTGTTACGAGAACTTGATCAACGGTGATATCAAAGTTGGAGTCACGCTTTGTCTTATCCACGATT
CGATGAGCGCGCCGTCGCCGAGCTGGAAGAGATATTTCAGCGTCGTGTCCTTCGAGCCCAGCGTGCGCACGGGCGTCAGGTCATCGAAGGCGAACTCCGCCGCGAGC
TAGTACCATTGAAAACGGAAATGTATCTTGGGAAACTCACAATACGTATTTTTATGATACTGTAGGTGATTACATACAAAATGCTAAAGATTTATATAGAGGTAGAG
GACAACAGCGACCAGTTCCTGTCCGAGTCGGGCTTCCAGAAGTTCCCAGTGCTGGCCCCGCGCTGGGTCGTCACCGGCAACGACGTGTACGGCACCAGCCCCGGCAT
AGCAGCAATTAGCATTAGGTGTATCTGGCGGTGGAACAAGAATGACTTATGGAATAGGTCAGCCATACGAAGGTCAGGCTAATAGATCAGACATTATGGGTGTAGAT
GTCTCTTCAGTTCTATTGAAGATGGTGTAGAGCTATGAAGAACTACGGTGTTAATACAGCTAGGCTTGTACGGGATAAGCTAACGGTTATAGGTCAATGCTAGAAGT
CGTTACAACCGATAAGGATAAATTATGTACAAGAAAATTCAGTTCGACATCTGTTGAAACTACCCCTTGCAGGAGCAGGCGTATCTACCTCTGCAGCGAGCATCACT
CTTCTTCTTTGGCTCGAAGCGATAGACGGCGCCGTTGGTGACGTTGTTCGGCCCCGGGTGGTTGCCGTAACTTACGTACAGGTGGCCTTCGGCGGTCCAACGGCGGC
CATTGGTAGCAAACTCATTAGGATCAAGTGATACTGAAATAACCTGACCAAGAGCAAGACCAGTAGAGATAGCACGATTGGCAGTATTTACAGCAACTTGCTGCAAG
GACTGGAGAGCTATGACCGGACAGACAGATGAAAGGACAATTGGGTAAGGACAAGATGGGCAGGAGTGACAACATACATGCGAAGGAAAGAACAGGCACAGGAATTT
AATATTCTTTTGTAGCATTGGTTCACCACCAGTTACAACAAGAACAATGTTTCTTTTCTTGATAACTTCATTACCCTGATGAATAGCTTCTGCCCAACGAGGAACAT
AAGGCAAACGATCCAGCGGGCGCCAACCGAGATCGCCACCTTTCAGCGCATCTGGCGCATCGGAGAAAGCGGCGGTCAGTTCGGCAAAGTTTTCCCCGGACTGTGCG
GGTTGTCATTGAATAGTTCATTTACCGAATAAATTAAGTAAATTATTGAATAATAAAATAAATTTTTATAATTATAGTACTTGCAAAATATTANATTTTTTTTTTCG
CTTTCATGCACGGATATTACGCCGACCTCCCGCGCAAGAACTGGAAGAACTAAGAGACCTCTTCGGCGATTATTGCAGCCAGGTTGAAGGAACGTTGAAAGGGTAAT
CAATCAGAGACAGCGGAGTCTTTGTTTCAATAGCATCCAACACATCATTAGCCACTTCAGAGCTACCGAGCAAGCTGATGTAGGTGTTGGCAATGGCGACAATGTCA
TCAGGATATGCTGCATCGCATTGATCTGCCGCTCGTGGACGCCGAACGGGTCGGTTGTCGTTTTACAGCCTTGAGGCGTTGTCGGCGATGTCTGCTTTTTCGTTAAG
TGCTATCGAACGAAATCCCTATCTGCGCAGTAGGCTGTACAAGTAATCGGAATCACTAATTACCTCAGGCTTGGCGGACGAGTAATGGTGAGGCTAGACGACTTATC
GATGTGTTCGATGCGGTTATTGCTGAAGTGATAGAGGCCTGTGCGAAGTTGTGTGCTCAACTTATGACTCCATGGGATGAAAACACACAGAACCACGAAATAATTGC
CGAGTGAGTAGCTACGCTGGCCCATAACATTTTTCACCGCTTTGAGATAGGTGTGGATTTTTACAAAGCTGTCTCGATTGGTGATATCATACACGAACACAACCTTG
AGATGGGACTGTTTAATTGGAGATGAAGTACAAATGATAAAATCATCGGCAGCTATCAGATCAAAAGCTTTTAAAGCTATTTCAAAAAACATCCCTAGTGTCATAAT
AAACGTTTGACGCGGCGTGGAATGCTTTAGCTTGACGATTGTATTTTTCAACTTTTGCTTTAGTAGCTTCTGGAAGTGGTTTTTCTTACCATTCCGGTTCCGCCGCA
GTGGTCGGAATGGCCGTGGTCGCAGCAACCTGAACCGGGGCCGATGAACTTCCGATGATCTGCCCATCTGCATTGACTGAGGCAACCGCCTCAACCGTTCGCTTGCC
TGAATTTGTTAGTTCTGGCGCTTTGGTTTCAAACGTAATTCGTCGTCATGAACAAGAATTTAGAGCCAGCAAAAAATAAGTAACATCCGCAAAATCATTGCCAAAAA
TCCAATACTCTGCCGTCTTTGTCGGTTCGGTACGAATAGCCCCGGATCTCTGCGATGAGGTTCTGACTGTCCCGGTGTATGTGTAGTTTATGGCGCTTTACCGCATC
TGCGTTTGTGGTTGAAGCAAAAGCTGCTGGCGCTCCTTTTGATTTTTGAGCTGCGACGCATGGGAATTGCGGTATCTGAGTACACGCCGAGCCGTGGTAATGATAAG
CATCTGCTATCACTGGTTCAGGATTGAATGTCGGTGGTCGCACTCACTTTGATGACGCATTTGCTACGTTGCGATATGCGAACCCGTTTCGACAAGGCGCACGAAAC
GACGTGACCAATGGCGGGGACCCCGAAGCAAGGGTGTGGGCAAGTATGCGCAAATCTCTGCCCCCGAAGACGCACTCGACGAGGATTGAAAACAGGCACGGCGGCGG
TATTAGTTTCAGTTGAACTGAATGTAACAGTTGCTGTTGCAGTAGCAGTGTTGAGAACAATCTTACCGTTAGCTGTTGTGGCAAGAAGGGTAGTTGTGGCAGAGCCTG
TTGGTTGGTGGCCGTCAAATCGATTATATTGGGGAAGGCCCAGTTAATGATGAAGAGGAAATGCCAAGTTATGAAAGGCCAATGCCGGGATTAATAATGATTGAAGGG
TGTTGATCCGTAAGTTCCTAATGCCACCTAATTGCTCCTTAAATTATTTTTTCTTGCCCATTTTCTTATTGGACATCTTTGCCTCAGATAGTGCAATAGCAATTGCTT
TATCACTCTCATAAAGTTTTTTTGAACTGTGAATTCTGAGTTCTTTTTGAAATTCTTTATTAGATTTACAGGTTGCTCTGGATAATGGTTCCCCAAATATACTTAGGT
TGGGTATTATCCCAGGGTGTTCCCGCAGATAGATGGTTCGGGTTTACGCAATAAGGATTGTCACACGAATGCATGACGACCATACCCGGGGGGATAAAGCCCTTATGT
GCTGATGACGCCAACCTTGATCTGTCAAAAGAAGGTCGGATTCTGTAAAAATGAACTGGCAAAACATTCGGCATCGATGCTTCAAGGATAGAAACAGAAGGCATGGGT
TGTCCACTATTTCCTCGAGGCTTCCACGCCCCTTTCTGTATGGATCGCCATTCTCATTGGCGGAGCGGCCAGCCTCGTCGTCTCCCTCATCCACGCCTATGCCTCCAT
ACCGGCAATCACAAGCTGGGGAATTGGTTCGTTCGATTGAACTTGTGCGGGTCGGCGAAAAGGAAATGGCCGATCACTCCCGCGCTTTGCATCGGTTGTAATGCGGGG
AAGCAAAACTCAAACACAGTTGAATGCAAAAGCTATACAAAATGAATACAAAACTGATACAAAAGCTATACCAGATACAGATACAGATACAGATACAGATACAAATAC
AGTGTTTTCGATTGGTGAAGTGGCGATTGCTTCTTCAATGGCTTCTTCTGTAATCGTGTAGCCAAGAGAAGGGTTGGCCATCGCCCACGCTTCTCGATCGTTTATCTT
GGTTTCTACACCGTATTTTCTATATTTGTTTTCTTTATCTTTCTGATAATATTTTTGACCCATGTAAAGTCCCACCATATCTTTCCTCGCATGTTTTCATTTGTTTTC
GATATTATAGATGTTTAGCAGCCTTGCCACTGCCTTTGCATGATCGACCCCAGTGCAGAAGAACAGCCATGCTTTCCGATCACCAGCCAGCCGGATCACCTCGTTCAC
GAATCAAAGAAAAGGGAAGAAATGGCCTAATAGTGGGCGGAAATAGTAATTATGCAGGTCTTCGAAGTCTACAGTGTGCTTCCCAGCCCGGACCTTGCCTATCTCCCT
GATCGGTGGATCGCGGATGTGCGGGACTACGAAAAGCTATTTCCCTATCCGAGCCTCCGCTTCGCCACGGCATTTTGGCCCGGTGAAAAGGCACCGCTGCTCCGTCCT
GACCGGAGTGAACTATAACATACTGTCCCTGGCTTATCACGCTCATCAATAATGTTAATATGGAAATGATGAAGAATTTCATCGCATTAATTTTTGTTCTAATTAAAT
TATGCGTTTGACATTCTTATGGACAAGTTGTATCAGGCACAAGTAGCAGACATTTCCATTGTAGAAGATGTGAATAACTTCATAGATAACAATGTGGATGAAACGATT
TCTCGCAGGTAGTATACAAACCCTTCCAGCTCGCTTTTGGCTTCTGATAGCTTCTGCCGCTCCTTCTCCAGTCTCGTGAAGTCGACAAGTTTGGCAGCGATGGCTTCC
CAATCCGGTTCAGCTTCGTTATTTGAATCTGCCCACAGGATTTACGGGCAGTTTTTCCGCCAATCCGGTTGCATCGCCTTATTCCAAAACCACCCAAGCCAACGTGAC
AGGCGATTCAGCGATTGGTCATGTTCGTTATTCAACGTGCGGGCAAAAAAATGCGACGTAATTATTCAACCAAATTTATGTCTGTAACTAAGTCATGGTTTTCTAGCG
GCTACTTGGCGTAACTGGATTAGAAATTCTAGGCCAACGCTTAAGCCTGTCGCTGCTGATCATAATGCGTGGATGATTGCTCAAAGATTGAACTATCGTGAGCGCGGT
TTATCCATTCATAATATGCATATTGATATGCAGTTACCACTTCCATCCCTTCTTCAATAAATTGCTTAGCTGTATGTTCTACTTCATAACGAAGTCCCCAAGCCCCAG
GGATTATTAACAGATACATTATCATTTGTTGGTGGAACAGGTCTTACATCGGCAATAACAAATAATACCGTAACATTTGATATTGATTCAACTGTTGCTACATTAACT
AGGCGTCGTTGACACAAGGAGGAAAAAATCGCCAAATCGGCGCGATTTCGCGATTTACTGATTTCGCGATTTTTTTTTAATTGAATCTTTCCTATTTAAAAAAACTCG
AATATAACAAGTGAGCCGGTTGTTGTTAATGTAACCGAGGAAATTATACAAGTATCACCGATAAGTGGTGCTTACCCATTACCGACAACCGTGTACTCGGTATTCGGT
ACTTCACCGTCTTCACCAGGACCACGCCCCTGCTGTCCCCGATTCAGCGTGGCGGTCAGGTCTTCCAGGTCCGTGAGCCGACGATAAAGACGGTCCGTGGCATAGACG
GGAAGTAGTACAATAAAAACGATGTTGTGTTGTTAGAAAAGGTTTATGATAAATTTAAGGCATGGATTAAAAACCATCCTAATCATAATGCGTATTCCGCAAATGCTT
GTTTCAAAACAAAGAAACATTGAACGTGGACAGCGTGGTGGAAGAACTGTTCCTGAAGATATTCGAAAAGGTAAATGGGACGCCGTTCAAGCTGCAAGAGCCGAACAT
GTGGAGACGGCCACGGAGGAGGAGAAGGCAGGAGAGAAGGCCAACGCAGCAGTTGCGGCAGCGACGGCGGCGGCGGAGGAGAAGAAGGACAAGAGGAGGGCGACGGCG
ATAAACATTGACTTCATTGATGGTAAGATGACACATAGTCCAAGTTATATGGGAAGACAAATAAGAAATGATATTAATTCAATGTTTGGATTTGATATTGATAAATAT
GCCCGCGCACGGTCCGGCAGTGCCCGCCGGTGACGCGGTACAGGCCGTGGAAGGGGGTGTCGCGCTTGAGCGGCAGCAGGGCCCACCACAGGCCGTCGCCGCGCTCGC
AGCGGTTTTGTGGTTGATCGTTACCACATCCGCCGGCTCGAGGTTGGCATAGGTCGGCGGCAGGCTAAACGGGCCGAATTTTATGCGCTCAGTCCATTCCTTCGCGTT
AAGAGTGCTAAAGTGATGGATGGATGAGAGGGCTTCGGCCCCTCTTTTCTTTTGTATATTTGCATAGTGTTGCCTAACACCNGTTTTTTTTTTTTTTGGGGAAATTTT
TGACGCTGCCGCTGCCTTGACAACGGGTAGTCCTCCGTCCACCATTAGGTATAGCAAAGACGGCAAATTCTATAGGGTTATTAGGAGGGAATGGTAATGGCGCGTCAT
AAGCCGCAAAACCTCCTCATCGACAAGAAAGGCAACGTCAAGTTGGCGGACTTCGGCCTGGCCAGAGCCTTCGGACTGCCTGTGCGGACGTATACACATGAAGTAGTG
AGCAAAGTAAAGTATAATATTTTACATACACAAGTATTTTACAATAAAATTTATTTTTTTTATTTTTTTATTTGCAAAGTAATTGTCGTATTAAATTTTAATTTTGTT
GGTGGTGGCGCGGGAGCGACCACGCCGTACCAGGCTGTCGGCGCAAAAGCGCAACCCGGCACCGAGAACACTGGCGGCGGTGGCGGTGGTGCCCGGTACGACGGTGGT
CATCCCGGAAACGAGCAAAAGGCGCGGCCCCTGGTAGATGGGAAAATCTACATAGTCGGCAACAACCCCGGCCCGGATGCTTTTCACAAAACGCCGGGCCGGGAGCCG
GGTGTATTGCTGCTGCGCATTCAGCACATCCAGCTGTGTGCGAGCACCCGCCTTCAAAGACATTTGCGTCGACTTCATCATTTGCTCAGCCGATCTTGCCGCTTGCTC
ATGGTTCCAAGATTAAAGGCTTACCAGCATCAGCGCCTTTAGCGTGCCTTAGCAATGATGAAAATTTTAAGAAATGATCTACTGCTTGCGGTTTAAATTCCCATTCCC
CGTATTGCGCCGGGGGTAGTTCGAAATCGATGCTGCCGTCAATAGCTTTGGTCACCGTGGCGTATTCTTGCCACTGGCCGACGTACTTCTTGGCCGAAATCTTCAGGT
GGTGTATTGCTGCTGCGCATTCAGCACATCCAGCTGTGTGCGAGCACCCGCCTTCAAAGACATTTGCGTCGACTTCATCATTTGCTCAGCCGATCTTGCCGCTTGCTC
AGATTGCCCAACGAATAATTACAATTCCGCTGCCGCCAGCACCCGAGACTCGTCCACTGGCCGTATCGGTACAGGCCCCGCCGCCGCCACCAGTGTTTGCAGTCGCAG
GATTTACTTGGCTCCCCGAGCTGGGCTCGAACCAGCGACCTGCGGATTAACAGTCATAAACAAAATCAGGTAAGTGTATGATTTTGTTGGTTTTTGTGTGATTTATGT
CCCTTATCCGGTCTAAAATCTATATTATTATCATTCAAAGCTTCTGTAGTGGATCTTTGCCGTCAAAAAGAATCTTCTAGTTTTAAATAACATTTCAAACATAATAAA
GAGCACCAATAAATATCATCATAATCACAACAAGAAAATAATTAAAACAACTGCACAAACAAAATTAATGCTATCCAACCTTGTTAACAGATATAACATAAACATATC
GATGGACAGCCAAAACAATACGACCTATGCCTCGATACTTACGCCTACGGACAGCGGTATGACGAACTGGACCGAGGCAGGTTATCTTCTGCAAAACAAGCAAGGGAG
AATGGCTCAGGCAAATCAATGTTGTTGGGACAGTTAAAACTTGGTCTATTGGCTCAGAACAAAAAAGTGCTTACTGCAAGCCTTGAAATGCAGCCATATAAAACGCTT
GGCCGATGGCATCAACTGCTCGCTCATCATGCTCATCAGTGTGCAGACGTTGATGTGATAGTTCTGCTGTAAGGAGGTCCAGCACTGGATGGCACTGGCGGTCAGATC
TGCTTGGCGTAGTGATCCACCTGCTTGTAGCCACTCACCCGGACAAGCTGGCTAACCATGCCGTCGCCGTCCATGCACAGCCCTTGATCGCCGCCGCTGTGGAGGTGG
ATAGTAAGTTCTCCCAAAGTGTCTAACTTCACTGAAGGAATAATCAGGTCAAATGACCAATCTTCAATAAGCATTGCTAGAAGTGAGTCTGTGAGCGCCATAGCCTTT
GATATAAATATTGATAATGCAAATTTGAAATTAAATGAATTAAACAGAGATTTAACTAAATTGAAATGTCCTAATTTAGAATTAAGATTAAACTATTTAATTACAACA
CTCAGCCCTGATTTCCAAGTGGTCAGGTTTTCGCTTTGTTTGTTTAGCCACTTTTTTCATAAGCCGTCCAAGTCAATTACCGCCACCAAAGGGATTTCAAACTCGAAT
GTGGTGGTGGCGGTGACGCCGATGCCGTCGATGATGGCGCGGTGGTTCCACGGCTCGCCGACGCAGAAGCCGTCCATGTTGCCCACGCGCATGTTGGGCCCACCATCT
CAACAAACGCGCCGTGTCTGAAACGGCAATCGAGGAACTGAAGAATGGTTAAGGTTTCATGGCAGACGCTGGCGGCGAACCTGTCGAAATACACCGAAGCGGAAGTCG
GACGAACTGGACGACCTGCGCTTCATGGCCGGTTCGCCGGACAACCAGTGGCAGTGGCCGGCTGATGTGCTGGCAACCCGCGGATCGGTGCAGGGCCAGACCATCAAT
AGGGCTTCGTAGGTTTTGTTCACCTCAAAGCTGGGGTGGAGGATGGCGTTGCCCAGTTCGCCGTCGTTAGTCATGAGCAAGGCCCCTTCGGTGTCCAGATCCAGCCGG
GGATCAGCATTCCCGAACCGCACCTGCATTTCGGCGGCCCTGCCAACCTGCTCATGCACAACGGCATCGACAAACCCTGAGGACGATATGAAGCGCTATTTCATGGTG
CTATGGGATCAAACTCGACCTCACCCCTGTGGTGCTGTACGACCGCTCGGGACTGCTGTTCGCTGCCAAAGCTTGGTGGGTGTTCACTGTGTTCGGCCGGGACTATGT
GCTCCACATCTGCATCTTACAAAATAGATGTCTATTCTTACTTCTGATAATCCAATTACATTAGTGCATTGAATCTTATTATCGTAAACGTTCACCAACATCTAACTT
CGCGCGTGGCCTGAAGCCGCTATCGGCGACGCTGACGACGGAGAACCAGACCCAAGAGAGCGAGCGCAAGCAGGGCGAAGGCCGAGCCCTGGCCGTGGCCGCCGATCG
CAACCGGCTGCGTCGTGAGTTGGAGAGCACGCAACTGGATTTAGAAATCGTAAAAAAGCGGCGGCGTATTTTGCGAAGGAGTCGCGGTGAAATACGTCTGAATCGAAG
GCAATATCAATCTCCGGCGATACGCCGAAGTAATGCTCGCTATTTAGGAGTGCAATCAAATAACTCAAATAAGATTCCCTCATACATCATTTAATAGTTGAAACTCTG
CAATATTATGTTGGAGTGTGTAGGTTCAATTGGTTTCGGTGAAAATGCACAAAAATCATCTATCTCTCAACAAACAAAGTTTTTCCGTAAGTTTGGTTTTAGAGTATC
CCAAACCAACCCGCCAGGCGTGGATTGCCGCGCATGAACAGGGCCCAAATGAGAACCGGCACCCCTGAGACACGCAACGGGGGATAGGCAAGGCACACAGGGGATAGG
AGATTTATACGATGTTTTTAGAGACTCTAGAATACAGAGCAGAACAATACGCAGAGGACAATATAGAATGACATATAGAACACTATTTATTAAGGTTATGAATGAGAT
GGACTTCTGATTTCGGAGATCCGGGTGAAAGTTCAGAGCGCCTCCAACGCGGCAATCAGCATCATCCTGTCAACGGTTGCAAGGCGAGCAACTTGCTGACCACCCCGT
GGCCGGATGATGTCGGCCAGGGCAATCGCCCCTTTAAGCTCCCCGTCAATGAGGACGAAGACGACTGTCTTGCCCTGTGCCTGCAGTTCTTCCACCCGCCTGTCGGTC
GGACTCCTCTTCATGTTACAGCAGATAACAATTAAATCGACCAGTTTATCATCAATACAATTAAATCGACCAGTTCATCATCAATACAATTAAATCGACCAGTTCATC
CTGACGCTCCAATCTCTCTCCGCAGCAGGACCAAAATTATTCCGACGTGCCTGGCTAAGATATCGGCCAAAATCAGAGCCTTCTCAAGGCAAGGGAGAGAGAGCTGCT
GCCTTGACACCATAAGAAGTCACACTAGGGTTATAGGTCGAAGTGTATTGAAGATTAGATCCTCTGGTCACAATGGCTTTGTTGATGACATATTGAGTGCCCGGGTTT
CATTAGAAAAAGTGTTTTTACTACTGAGATTATCATCTAAACTATTAAAAAAGAAACTTCCAAGTATTAATTTTCTATATATATTTTTTTAATTTTTAACTTTGTAAC
TGTGCGCGTCAGATTCGTGCGCCAGTGTGATGATGTCGCCAGCGGCGAGGCCCGTTGTGTAGTCTGCCGTTGCAGCCAGTGAGGTTGCGCCTTTCGCCCGCACTGCGC
AACAGCTTTTTCAAGCTGGTCTTGATTCGCATCACCATAGATGAGTTGAGCAATATATTTAACAGGCCCGACTTCTGCTTCAATTTTTTTGATATCTCCTTCTGTTCT
TCCTTCACAGATTTAATGACGACGTCGGTTTTTAAGGTTTCACGCGCATCGATGGACGCCACGAGGGCGGCGACCATCATATCTTCGTCTTGAATGTCTTCGATTCCG
TCATAATATACAGTATCAGCAACACAATCCATTCGTAAGTAACACGTTATCCGCGCTCCCTACGTCTCTCCCTGGCTATAGCCGCTCTTTTCAGCCTGCGCTTTCTAT
CACGGACAGAGCCAAGACGCAGGCAGATCGGCAAGATCCCATGATCTTAACCCTGCGTCCCTCAAGCCGGTATTGCTGAGCCATGGCTTGGTATTTAGACACAAGCCC
GAAACTCTCCCAGTTGGACAGCAATGTCGCGGAGGCGGGCCTCGCCTTCGGGCGGGGTATAGATGACTTCGCCTGTATGGTCGTTGGCGAAGCTGGGTGCCAGGGGTG
TATATTGGACAATTATGGACAATTTGTCTATGGTTTTGTAAGGTTTTTATATGAGGTTTGTAAGGTTTTATACTTGACAAATGTGAGGTTTGGGTATATAATCCGCTT
GGTTTTTGAGTTGAGCCAGAACTAGACCCGAAGTAATAGGATACAACCATACCGCAGATGCTTGATAAAGCGCCCCAAAACATAAAATTGCCAAGTCTTTGCGTGAAG
TCCAATGCTGGAAACAACGGTACAGGAATTGAGCGGGCGTGCACTGAAAGCGTTACAGTCTGAGTTATATGATCGCAGGGAAAATGACGCTGAAGTTATGGAAGATAT
TCTGGTAAGTCAGGTATCACTGCATGGTTTAAAACAACATGGCCACAAGACACAGTTGGTACTATTGAACTTAGTGATGAAAACTTAGTTAAAAATGATGCGACTGGT
CATTGAGTTTAGTACTGTCAATCGTAACTTGGGTTGCGTATATAGCGCCAAGTTTACTCCACTTACCGTTTGTTCCCCTGTCTGAAGCTAACCATAAATGCAAATGGT
GCATATACTATACTAACCAATCATATACTTTACATTTTAAAATTCCTACCAATAAGATTCTTGGGATCGACTCTTATATGATAAAACCAACGCAATATATATAAGGAC
CACCGTCAACATTGTTTAAAACTTGCCCTGTAGAGAAATCCACTCCACCCTCTGCGGTATCTCCACCAACTACATAAGGGTAATTAGGTTTAGGAAATCTATAAATCG
GCGTACCGCCAGCCACAGCCACCACAGTAACGCTGGAACCTGTTTGGTTTGCGCCGCTGATGTTGGTTGCAGTGGCGGCGCCGTTCGTGTGAACGTCCACGTTCTGAT
AAGGCCCTTTTCCAACCTTTTCTAAAAAGGAAGATTGTCTTTAGCTTAATATAAAAAAGTTGGGAAAATGGGGTTCGATTTACCGGTTTACCGGGATTTACCGGGATT
TATCGTTATCGCATCACAATTTGGGGATAGGGAGAAAATGAGCTACATAGTTACTTCAGATAATTTTGAAGGTAAAGCAAAGGGTGATTCAGTCACCGAAAAAGAATT
CAGCTATGTTCATATCAAAGATGGAGTGGAAGATCCAATGCAGTATCCAGACGAAGATTCAGATGAGGAGAAGAAAGTTCTTGACATCATTACTCCTAATCAAGGGAG
CATGCCAGCAAGACCGCCAGTTAACTTCGCAATCACTGAATCCTTGTAGCCACGCAATTGATCAATCTCAATCTTCGGCGCTCCAAAGGTAATGCCATGCTTAGCCAT
CGGTACATTGCCGCAACTTGGTCCTCCGCTTACGTACGACCAATGAGCTGTTTGTGTCCAGTTGCCGCTTCCGCCGATCCAGTAAAATGAAAAGGTCCCGTTCACCGT
GGTTGTTGTTGATACTGTGCTTGCCATTTACTTGCTGGAATTTCGTTACGTACAGCTTCAAGTTCTTCAATGTTCCAAAACTCAGGCCATAGTGGCTTGCCACTGGGT
TGAAAAAGGTTGTTAAAGTAAGTATTGGCAACATCGCCTTCACAATTGAAGAGGATGGATATCTGGTTCTTAAGGGTTATCTGGAAGAACTGAACGACCATTACAGGG
AAAACTAAATAAGATAAACAATCAATATTACAATTAGCATTATTTTCATTTTCCTCACATATCCCATTTCCACATATATTTTTCTCAAGGATTACCTGTCCAATAAAT
GGCGCAAATTTACAGTTCCTGTATTAGAAGTAATTGCATTACCAGCAACGCTTAAATTGCCAGCGGCGTAAGACAGTGCAGATACAGCTCGACCAGCAGTCAAATTAG
GATAGATCGTTTAAAATTGTATTGTCATCATTTTCGTAGACTTGATCAAGTCTGATTTTTTCATGCTCTGCAACAATGGTGGCTTGATAAATCCATCCAAAACGCTGC
GGCGTTGATGGGGTCGATCTCGGTCACCCACACTTGTGCGGACAGGGCGCGCAGGGCCTGGGCCGAGCCCTTGCCCACGTCGCCGTAGCCGCAGACCACGGCCACCTT
GACAAGAAGAATGAAGAATTCAATTTATTTTGTCCTTAAGAAAAAAAAAAACAAATTTTTCAATAAATTTAAAAGCAAGAATCCTATAACTGGCTTGAGTNTGGAGTA
CTTCCTCTTCCTCTTCCTCTTTCTCTTCCTCTTCCTCTTCCTCTTCCTCTTCCTCTTCCTCTTCCTCTTCCTCTTCCTCTTCCTCTTTCTCTTCCTCTTCCTCTTCCT
CACAGCAAAGAAAAGGCCCTGGCAGAGCAAACGCGATGGCGGAATACACAGCAGTGGACGCGCAAACGCACAAGACGCATCAAAAGCGCAGCACAATACTCCCACGAG
ACGGGCTTCTTGGTTGCGCTTGGCAATACCCAGAGGACTTTCTCTCCCTGCAAGCTGCGACGCAGCCGCATGAGCTCAGCATATGTGTCAATGTTACCGTCGTTCGTG
CGTAAACGAACACATCAAAGGTCTTAAAGGTAGAGAGTGGCAAAATATGCAGCGCATTATTAGGGACTTTAACAAAGGTAAGATTACCAGAGAGCAAGCAAGTTCAAT
GTTTCGATTGATTTTCGCCCCCGTTAGCCCGGCATTTCCGTTCTGGCTGAACCGGGCAATCCGGCGATTTGCGCCCGATGTGCTGCACATGCACATGCTGAGACACGC
CGGAGAACGTCCTTCTGGCGTCTCCGCCACGGCGAGATCGTCTGGTCTCAAGCCTAAGGCGTTCGTCGTGCTCATCGGGACGAATAACTGTACCAACTCCACCCATTT
AATTCTATCTTATGCAGGAATATCTAAGGTGCAATCCATAAAAGATATTGTGTAATCCGATTGTATTGTCATATCCATTGTACAGCCATACTACATCCGCTTTCGATA
CGCTACGACCGTACTCGATTTTGGTCTAATGGGTTTTTGTGTCCCTTCATTCCTACTCTCGTTGGCCCCATCTTCTTCAGCAAAACTGAAATGTTCCGGAAACCGGCG
TCGTCGGTATCTACGGTTCCGCTGGGCTGCTGGCTGGGATTAAGGGTATGCCGTTGTTCGGTATGCTAGCACTGATCTGGAACCTATTCCGCGACGATGACGAAGACG
GGTAACCAGCGACAATAACAACAGTATCGGCTTTGTTATTTTCAATCTCAGCCAACAACGTATCAATGGCTTCCTGACCGTATGAGTCATTGTCGCTTTGCTTCAGAG
TATTTCTGTAGCCGACGATTTTAGCTGCATCCTTTCCAGCTCTTTCTTAAACAGCTTGGGGTTCTTGTCGTAGAAAAGCAGCGTTGCGCATCTCAGGCGTTTCGCCCA
GCTCCAGATGTTGCTAATGGTAATGTACAAAAGATCACTTTAAATTCTGCATTAACTATTGAATGCATTTTACAAATACCAGTTGCTGGTCAAAGTTTAACTTTAATC
AGCTAAGGAAATTTAATGGGATTATTTAAGAAGGTTGCCTGCATGACCGATATACACTTCGGTCTTAAGTCAAACTCATCAATACACAATCAAGATTGTGAAGAATTT
GCAGCCGATGGACTTCGCCCGGCATTCTAGCATCGAAGCGTTAGGGCAAGAATCAGAAAATTATTGATGGCGTAACTGTTTTCAGTCGCGCTGAATTGGTTGGTTGCG
CATTGAGTTTAGTACTGTCAATCGTAACTTGGGTTGCGTATATAGCGCCAAGTTTACTCCACTTACCGTTTGTTCCCCTGTCTGAAGCTAACCATAAATGCAAATGGT
ATTAATATTATAGTGGGTTCGATTCCCGTGACGATACCAAGAAGGGAAACTGGACAAACCAAGTGTCCTCGGCTGTGTTTTGTACATACAAATGCGTGTGCATCGTGT
GGTTTAGGACTTCCTGTTCTTTAGCAGAAGGATTTGAATTTGTTTGTTGTGCAAAGGACCATTGCAAATTTATTATTAAAAAGCATAGTCCGATAATAGGTTGTTTTC
TGCGGAAATTTGGTATGTGTCTAAAGACAGCAACGATGACTTTGCTGCAGGCAAGTTAAGCAAGCTGGACTTCGGAAGCTCTGCTGCTCCCAAGGGTAGATATATCAT
AACATTAAACAATGCGGTTTTAGACCGTTTACGTAAACGTGGTAACGTACGCCCATTCTCAGGCGGTAACGTGATCTTAGAAGAGATCATGTACAACGATACCAACAC
GTGAGGTGTTATACGGCGACATGGAGCATGAAGCCGGGCGGGCGGCTGAAGGGCTGCGATGAGGCGGCGGGATGCGGCGGGCAGCCTGAAACAGGTCCGGTTGGCTGT
CCTTCAAGTCGAAGGTCATCAAGGCCGAGCTCGACGCGGGCCGCCCGGTCGACCTGTTCATCGACAACCGCTCCGACACCCGTGAAGCGGTCGCCGCCCTGGGCGTCG
GGTTGGCTATGACTCACAGCGACGGCAAAGAGTGGCTCGAGGCGCACGGCTGGAAGGTCGGACGACGAAGGCGAGTGGCGGCGAAAGGGTTGGTTTGTAGGTGACCTT
AGGGCTTCGTAGGTTTTGTTCACCTCAAAGCTGGGGTGGAGGATGGCGTTGCCCAGTTCGCCGTCGTTAGTCATGAGCAAGGCCCCTTCGGTGTCCAGATCCAGCCGG
TGGTTTGTATTGGTCGAACATATGTGTAATGCTGTTGACATACTCCTGACGATTTACCCCCAAGCTATGCGCCAAAGACGTAGACATTACAGATACCGCATTGAGTGC
CCTGTCGATAGCGTAGCAAACGACGGCTGTATCACCAACCATAGCGGGATCAAGACCACAAATAATAGAGAAGCCGCTAAGGTCACGCGGATGGCCTGGGTGACCAGG
AACTTATATAGGTCTATAAAGGGTCAGATTTTCCGGTAGCGAAAACCTGGCCCGCCAGCACCAGCAGGCCAGCACCAGCCGGCCAGCACCAGCAGGCCAGCAGGCCAG
GCTGATGCAGCCGCCCGCGCCGCCCTGAAAGGAGACAACCATGAGTGACGCCCCGCTGCTTCCATGCCCGTTCTGCGGTAACGGAGACGTATACCTTCGCATGGTCAT
GCGTATTCCAGTCCAGCACCTGCCAATGCAATTGTTTAGCACCGGTTTGTCTCGCTACTTCGATTACTTTATCCAACAATTGTTTCCCGATTCCTTTTCCTCTTTGCG
CGCAACGCGATCAACGGCGTCATCGGGCTCTGGAACGGCATCCCCGACCTGTCGATCCCCGCCGTCCGGATCTTCGGGCAGACCGTGTTCCCCGGGTTCACGCTCGGG
GGCAAGTCGTCGCCCTTCACCACGTCCCAATACTGCTTTGCGATAGATTGGCCTGCAAACTCGCTCTCGGCAAAGGCTCTTGACGGAGCGTACCGGAAGCCCGTTGTT
CCCACCATGGCAGGTCGAGTCCGACGCGTATGGCTCGAACCAGATAATGCATCTGCATTTCCACCCGTAATCAAAGCCATACTTAACGCAGATGTGATCGTGGTTGGT
AGTACCATCGACTTCGGCCTCGTGCCGCCCAACACTCCGATCTCGCTCGCGTTGAAGCTGACCAACGTCGGTCCCGCCACGCTGACGGTTTCGGACCTGACGCTGGAT
CAGCTCACAAAATCACTCCCGTGAAGGGTGCAGTGCTCAACTTCTTGATAGCGAGAGTGATGAAGGACAGTGAATTAGCTGCCTATGCGGAGGTGTTCCAGGCGCTGG
ACTAATAGGGCGGCATGTTCTCGAAGCGTAATGGCGGCGGCATGTTCTGATGCTGTATGTGGGTTCACGATTTCTCCTGTAATGCTGTAATCCTAGATGGTGTTTTAT
CTTTTTAAATTTTTTAATCTTTTTTTAACTTTTAATTTTTAATTTTAACTATCATAAATATTAACTTTCTAAACTCTTACCAAATCAATAAACACCTAAATATCCTAA
AATGAGCCAAATGGTGCAGTAGCAATATATCATATTGAGAAGGTTACTTAAACGCTAGTGGGTCGGTATGGCATCGAGGGACTCTCATAAGGTCTTTAAAGTAGGTTC
CCTCTTTAATAACTTCAACAGGAATTTCCACTCGTTTTTCTCGGATTATCTCCTTTTCCACCTGTTTTTCTTGAATCCCACCTGTTTTCATCGGATTTAACAGACCGT
CAGACAAAATCATGCACAACGCAGCCTACGACGCCGGGTGGCTGGGTGCCAGTGGATTCACAATCAATGGCCGAATCCTGGACACAATGCTTGCAGCCCCGTTACTTG
CATAATAACAAATGCAGATCACTCATAAGTCGTAACTCCTAGTTAATAATCGATCGCACAATTGCGACCATCTTCAAGTTGGTCTTCGATATTGCCTAATGCGTCGTC
TATATTGGACAATTATGGACAATTTGTCTATGGTTTTGTAAGGTTTTTATATGAGGTTTGTAAGGTTTTATACTTGACAAATGTGAGGTTTGGGTATATAATCCGCTT
GCTCCAGCAGCATAATCGTTTACTGCAATGATAATTTGTATTTTGTTCGGCATCAACAACTTCAATAATAGACATTCTGGTGTTTTGACTATCATTTACGCCTTCAAT
CGGCCGGAGCCTCGCTGGGAACTACACCACCACCGGCGGCCAGAAAAAATGGCCGCGTACCGCTGGACTTGGGCGAAGCGGGCTTTTGGCAACAATGCCAACAATTAC
TCGGCTTGTTCTCCGCAATTGTAACGGTTCTCGCGTTCTTTGGCATCTTCGAAGAATTTGGATTGACGGTTCCGCTCATCCGACGAATTGCGCGGCGAGAACTGCCGG
CCCCAATCCTGTGCCGCCATAATGGCGCGTGGAAGAACCGTCCAATTGATGGAATGGCTCAAAAATTTCGTTTAAACGGCTCGGCGGAATACCCACGCCTGTATCAGT
AAGGCGTATTTGGGTTCGAATCCGAGCATGCAGCTCTCAATTCCGCTCCTTCAAGGCGCAGGCGCTGTAGTGATGAAGAAAGCTCTGGTCTTGTTTGACAACAAGGTT
CATAAATATATCACAAGAAGATAAATAGAGAATTTGTTTGACCTTTTTATACAAATAGAAAAGGAATGTACAAAGGTTTTTTTTGTTACATTCTATTAAAATAGTATG
GTTTGGTTGTTTTAATTTAGGGTTTTGTACAAAGGCAATACGGTTATTGTTCAAGACCTTGCTAAGACATTGATTTTTTTTACTCAAGCTTGTGAAGGAAACTTAAGC
CTGATGTTTTTAACAAAGAGTTTACAAATGGTTGATAAAAATCATAGATTAAAAGAAAGTAAAGTTTTCTGTATGGCTCCTTGGGTCAGTATTAACAATAATCCCAAT
GCTGTTGCTAATAGTGCTACACAAATTACCTTACAAGGAAGTGGTGCTAAAGCAGTTGCAGCATGGGACTTCAATGTGGATGCAGCAAATGTTAACGATTACTTCCGT
ATCATGCTGGAACATGGAGAAACGCATCAAAAATGCAACAAAACATGCAAAAAACAACTCCAAATCACGCTAGAACATTGAAAAACAAGAAACAATGCGCAAAAGGTT
GCAAAGAGGCAATTTACTGCTTAACTCTAAATTAGATGGCACAGACTTAGCAACACAAAGTGTTACAGTGACAGCAGTAGCTCACACATTGTCATTTTACGGTACAGG
AATATTTGCACGAAGAAGCAAAACGGATTAACTAAACATATAACAAGCAGTTGAGATTGGTTTTGAATGTTTTTTGTAAGAATATGAAATAACTATAACATCATAGAA
GAGTGAAAACGCAGACGCCTATCAAATCGGCGGGCAGCATTACAAGACCATGGCCGTGCAGCCGTGGGATGTGATGAAGGCGGTGCTGACGCATGAGGAGTGGGTGGG
GGTGGGATGCGATCAAGGTTGACCTCGACCTGCGGCCCCGAAGCGATGCCCATGTTGTTTGCCAGTGCACGCGCAGCCGCGTTACACATATCTTGGATGTCCTCGATG
CACAATGACAACATGGACAGAAGAAACACCAACAAAGGGAAGCGACCACCTGAATTATTGGGGGCAACATTAAAAACGTTAGACAACCAATGCTTTATGCGTTGGGTA
AGTCTGTATAGTCAATTTGTGATTTTGCATTAAACGAGTCATGACTGGACTGAGATGCGTTAAATCCGTGATCATGATTTTTTTCGTCTCTGTTGTGATTTGTACAAT
GGAGCACCTCAAAGCTGCCGCCTTAATAAAATCAATAAAAACCAGATGGCCGTGGCGTGGGTTAGAAGTAAACTCTGGGTGAAATTGACAACCAAAAAACCACGGATG
TATCAAATTGGCAGAAAAGAAACGATTGACGGCAGCAGAAACGGCACGCATGAAAGATTTGACAAGGGACTTGAACAAACAATATCCTGACTTAGTTACGAACACAGG
ATCGTTAGAGATCGCCAAGTATCAAACCAAGACTGCTTGTTCTTGTGTTGGTTGAACTCCTTGTCGATTTTCCCTCTTTTAAATAAACACCACCCCATACTCCCCACT
CGTTCCTAGCGGTGCCCGCACCGGGGCCGTTGATGTTAGCCACCTCCTACCCCAAACACATTGCCACTACCCGGCGCGTCTCCGCACCCAAAGTTGTTTGGGCAGCTC
GGGTGACCTGAAAGAAATAGTCCGACAACTTGCTTTTCTCTAGATAGTTTTTCATCCAAACTCCATTCTTCTGCATCCTTGGGAAGAGGCAAATCATACACAGAAGCT
GAGTATCAATGTCAATATGAAAACTTCGCTTGTATCAATCCACATAGCATTTAAATTTTAATTTCATTTTTTAGTTTTACTATTTTTAATTTAATAAGTTTTACTTTG
AAGTGAAATAGAGACAAAGGTTAAAGATTCAAGGCTTACCATTGAAATAGGGAACCCAGATAATAGGGAGGATATGTATAGTGGGTTTGATGCTATGGTGCTTCCTAG
GCTAACTGGGCCAGTCGGATGATGGTGCTGTCGTCCATCATGATGACCACCCGTAAACAGGCAAGCGGCCAAGCCAACACCGATGGCCAGAACGGTAAGGTAGTCAAT
CGTCCGTTGCAAATTCAAATAAAATGAGTATAGTTAAATAACTTACCACCGACGACGTGCTTCATTCCACGGTTGTGTGTGGGAGTTCTCTCTGTATTAACCTATTTG
TATCAAAGATATCTGGACGCAAGTAAATGCAGGACTGATAAACGGTGAAGGCATTACCGATATTGCTAAAGCGGATAAAAACCGTAATAGGGCGGAGTATACGACGGG
CGCACACGGCGATCGGCTTTTTCGCCTTGTTCGCCGCGCCGATGGCAAGCGCGAGCAACTTCAACACCGCGGGATGCAGCGGATCGTACAAATGCGCGACCGCGTCGT
AACATAATAAAATTGTGCCTAAGGCTGCTGCGACGCAATAAATGGTTTTGTGCATTTCTGACCTCCATTGGGAATATCACAAAAAATAATTCCTGCAGTCCATGCTGT
TAGCCGCGCGCCACCGCTTCGATCGGCAAGGGCTTGAGCCGCTTAACCACCATCGAACGGCCACGCACTTGGTCGCGCTCGGCGGCACTCACCACAGACTCCGGATCG
TGAAAACCTTTGGAACACTTTACGTGGTCGCTACACCCATCGGCAATGACGGGGATATCACCCTGCGTGCCATTGAAATCTTAAAAAGCGTGGATGCTGTGGTTTGCG
AGACAAAGCCAGGTGTCTCCGCTCCATCAGCTTCCGCTTCGGGGCGAAAAGATGACAGCAGCAAGTCACAAGTCAGTGAGTCCTAGTGACAATCCCTTCGAGGGCCTA
GTGCAGCAGTCCGGTGAAGCGATCAGCAATGCCATCAAGCACGAACGCGCTGCGGCTCTGATTAAGGATTTGGCTGGCGACCTGTCGGATGTGGTTGTCGATTGGATT
GCACCATACTCTAACAACTTAGTGATTGTCAGGCGAGAGATTGTAGCACTAACACCCTTCTTACCCTTAAATTCCCATGCAAAAGGTTTTACGGTTGCAACAGCTAGT
GCGGTAGCCGGTCTGTTCAGACAATGGGTGCCGATTCGGGCGCGACCTGCCCACACAGCGAAACTGCGCTTTTCGCGACTGCTGAGTTCATTCCAGATCGGATCGGGT
GGTGGCATCTTCAAAGTAGGCAGTGATCGTACCTTCAACAGTTGCCATACCGTACTCAAGTTGCGGGGTCGAGGCCGAGCCAACCACAAAAGTAGGGGCAAGTGCGTT
GACCGTTTGTTGGAATACACTAAAACCATAGACAAGCGTCAAATGCAAGCTCAGTTACTTGATGATATGGACCTTGAACGCGAACGAGGAATCACCATTAAAAGTCAT
TTATCCTTCCAATGGAAATTTGGTTTGTTTTCCAATATATAGTTTGCAATCTGTTGAATCTCTTTGTATTTGGTAGTATCCTCCGTAAATTTCGGTACGATTTTTCTC
CTTCGCTATATTTGCGAAGAAGAAAGCCGTGCCTTTTTTATAATGCCATTGCAGTGATTTCGCTGTTACCCATCGCTTGCGTTCCTGTGACCAGCTATCGCGCCACAT
GGCGGCATTGGAACAGGCCACGGATCGGCAGGTCGATCTGGAGAAGGCCCTGGAGAGCGGCGATGCGACAACGATGAACGGACTTTACCAACTCTTCGCTTGAAGGGAT
AAGGTCAACATATAATACGAAAATACAATGAAATTTATTGTGGTGTTGATAAAGGCAGCCCTTTTGGGTCATACATGCATGTATGGATGCAGCAACACAGTAAAAAAAT
GAGGTTCATGCTGGGGGCAAAAAATATGAGCATTTTTGAACATGACACAATAAGTCTATCTTCAAAATGTCATTATTGTATACGCAGTAAAATAATAAATACATGGTAA
CTGCTCCCACCTGGCAAGCGCCTTGGCACCATACTCGCCTTCGAAAGACACTCGGTGTGGACGCTCCGTCAGGTCGTCGTAGCCCCAGTATGCCCCGATGAGGTGCTGC
AATGGCGGCGTCAACGTCAGTCATTCCGTCTCTCCCATCGCCGCGCGGGCGGCGCGTATCTTCCCTGAGACACGCAAAGGGGATAGGCAAGGCACACAGGGGGATAGGG
GGTGATCATCGTGGAGTATTCTTAATGGTAGGTGTGTTGGGCTACGCATTAGACATTAACATCTACGATATGAGGCACGGTGATGTTGATAGTTGGATGGAGAATATAT
GGGTAGAAATTTATCAATCTCGCCAAAACGAATAATGCTCGCCACCCTTACCATCCACCTCCACCTCCCGCTCTGCACCTCGCTCAAAGAAAAGCGCGGGCGGATCAAG
GAGATATAAGGCAACTTGGCGTTGGCTAATTGCGTTAGTTTCGCCGACGTCTTGGCCATTTGCATCAACGAAAACGCACTCTCCATCATACGGGCACCGCCCGATTTGG
TATCCAAATGTCAGCTAAGACCACGGGAATATCTAGAGACTGGGCGAGCAGTTCAAATGTACCCTCTTGTAAAGAAACAATAACATCAGCGGTTGAGAGGACATCGGAC
GGTCGCTGATAGAACGGCGAGGTTGATAGATCCGGGGTTGCAGTGTAAGGTCGAGGCCGAGAGGGTGTACGGATACGTTGCCTCAAATTGTGGGATGGTAAGACACATC
CGCATCGAGGTGTCGTTGGCCAGATGCAGCATGCCGTTGTGGTCGCCGTCGATGCCGTTCACGTTGTGGCAGAAGTAGCAGCTCACGCCGCGTTCGCGGTCCGGCAGCT
CTTCGCAAGCGGACGCCCTTTGCGTTGCTCGATTTCGCGGCGCAACATGACGCGGAGGGGACGCAAGAGGACGAGCAGTTCCGGATCGGTGCGGCTCAGAATATGGGTC
GTACAGATCGGAAATAGTCTAGTTAGCTCTTATACCAGCAGTGCAATTGCTAGTTCATCTACACAAAATTTAGATATTTTCACTACCAGCACATACAGAACTGCGAGAT
TGATCTCGACTTCTCCAAGGGTGATCTTATTAGGCTGTGCTTGTCCTTGAACCGAAGCTGTAGCAGCCGAAGCCTTCTCAGCCAGACCAATACAAGTTACAACTCGTCA
TAAGTTACTAAGCGGAATTGTTAATTGCGAGATTTTCTGGATTGACTAGGGAATTGTTGCCTCTCGGTGCAGGCATTCCGTTCATTCCCATCGACAGAATTGACCATGT
TCGGAGAACCAGTGTCCGAGGCAGTGCACGAAGGCCGCGATCGCGGAAACCTCGGCCAGCGTCGGCGGCTGGTCGAAGACGCGGATTTCCAGCGTGCCGAAGCGCGGGC
GGAAATATTTAAAGTTGTGGAATTAATTGTTGATGAGCATGTTGTAGGCAATTTCCGCATTGGTCATGACCTTTGCCGCCATGATAAGGAAATGCCCGACATCCCCGGT
TGCCGACCTCGGGCGCGGCGCGCACGTTGGCCAAGAAGTCGTTGTGGTAGCCCTGCTCCATCATCCGGGTCTGGATGTAGTTTTCAAACGACCGGGCAGCGCGCTCAAT
GGTTAAAAGACAGGTTTGACAACCTTAGCACCAAAATTATAAAACTGCATGGGTGCTTGTTGGCTGTCAATATTTGATTTATTAACGGGATTTTTCTTATTTAAGTTTT
AGTAGATCCTGGATTTGCTTTTAAATTAGCTTGAATTGCAGCTTCTTGAATAGCGCTAAACTTCTTTGATGATTTACCAACAGAATTAGCGTATTGCTTAGCTTCTGAT
CTCGTTTTGCCCGCCCCAGCCGCTCCTTCAATGGCGATGTGGAAGCGACGCACTGAGTCTCGAAGGTGTCAATGATGCCGTATACGCCTTGATATGCCTCTACATAATC
CGGTTGCATCGCCGGGTGTTGATGCGATGTTGGACGAGGCGGCCCGGAGACATGGCATTCCGGCGGACATAGTTCATGCCGTCGCGATGGTCGAAAGCACCAAAAGGTG
CGTCCGGCAGCGATGCCCGCGCTATCTCAATGCCGCGGATCCCGTCCACCGCGGTCAACAGGCGGAGATTGGGATGACGCTCGACGATCTGTTCGACCAATCTCAGGTT
CAGGTAAAACCCTCACTCCGATGAGAACAGGATCAAACCGAAGCAGCGGATATAGAGCTAAGATAAGAGTTTCAACAATCCCAAGAATAGATATAGATGTAGCTTCTGC
GCTGATGTTCGGCGTGGCAATATCCTTGATGCCAAGCTGTATGCCTGTGGAGCAAACGCCACACACGGTCAGCCACGCACCAACGCAGACAAGCGCAATGCCGTCATGA
CATGCAAATACACCAAAAGAAGCGGCCGACATGACATGCCAATATGCAGGCCAAGCTTGAAAATTACCTATGTAGCTGTTGATGTGCATCAGTCCAAATAGCAAGGAAG
ATGGTTAATCGGAACACGGAAAGGAGCATGGTCCTTGCGACAAGATGGTCAAAACTATCGACTGATGAACGAACCGTGGTTTTTGGAGCGCAGGTTCACCATGTCGTCC
AGCAGGAAGATGGCATCTACGCCAGCTTTCGTGTAAGTCGTAGTAACAGAGGTACAGAGGCTCTTATCCTTGCAGAAGAAGGATTGCAGAGCGGGCTGTCAGTAGGTGT
TGTTGTCCCACCCCCTAGAATAATAATCGGAAGAAATTGCGCTCTCTACATCCGCCGAGCTTGTCTGTAGTGATAGGCCAACAATCGGGTTTCCACTAGTATCCGTCGC
GATGCTCCAGACCCGTCCGGCGCTGACGTAGTAGCTGTGCTGACATGGATTGACAGCAAAGAAGTGGACATCACCGATTACCTTAACGCCAATCTGCTAGACGATTTGG
TCTGCACCCACGCCTTCGTCGGGATGCAGCCGACGCGGAGGCAGGTGCCGCCGAGCTCCGGCTCCATCTCGATGCAGGCGACCTTCGCGCCGAGCTGTGCGGCGCGGAT
TCTTTTGCCCATTCATTAAAGGCTTTAACGATGTCATCTTTTTTTAATTTTTGTATAAATCGGCGTAGTCCCATTGTCGCGGGAACGCCATGTGGTAAGTGTAAGTGGC
AGAAAAACCAAGTACTATACGTCAATTATTCACGATGGTGTAGAAACAATTTATCCTTCTAAGGATAAGGAATATAGTTTCCCACCTAAGCAGTTGTGGATGTTTGGAG
GATCTTTCAGACCGACTGTACTTCTTGAACCTGTTAATGATTAAAATTAGTCTTACTTGTGCTTTTGGTCCTTGTTGGCAGCTGTTTTGGCTACAGGCTCTTTTGTTGG
GGGGAAGGGGACGTTCTGCCCGATCGTGATGCTGGCGAGCTGGTTGTCGCTCGCGAGGATGTACGGGCGCGAGAGGATGTCGAGCTTGCCCGCGGTCTCGAGTGCATGG
CGATCATTATACGGAAATTCCGCTGGACCGTTTGCACAACAAGCCGCTCACACCAAGAGAATCGGAGGTTTTGAAGCAGATCGCCTCGGGGCTGAGCACTAAGATGATT
CCGTGTACGCCAATGGGCTTCCGGAGCTTGTTGGAAAGGAAATTGCAGACCGCATCGTCAACGGAGAAGGAAACTCCACAGCAGACCGAGCTTAATAACGGCGATGTGA
TTCTTGCCTTGATGCTCCTTGGTTGTCGATCTGGGATGGAGGAATGCAAGCGAATTGATAGTCCTGACGGGCGTCTCGCTGTCGTGGTATTTCGGTAGACAGGGGGAAT
GCCTTTTCTGTATACCCGAGGTTGAAACCCTTTGACCCCAACATCTAGTGGTAGGCTAGTGAGCGCGAACCTACGCATTTTCGAAAGGATGTTCGAACATGGGCAACCC
CGTGCGTCCATGTGTGTGTATGTTTTATCCACTCTATATATATATATATAGCGTGCATCTTGTGCAAATTGGCGTCACACTCACCTTCTTTGACTTCAGTTCAGATGCA
GATCGTGTACGGCCTGCCGGTCGCTGGTGGACGCGGCGGCCTTGCGGTAACGGTAGTCGTCTGCGGCTCTGCGCCATCCCAACTGGTCGCTCCGAGCACGAGGAGGCCT
GCTTGAGCCAAGCCGTGCTACGCTTACACTCATAAGAAGCATCAACATCCTTAATCATAATACCTTCGTAGCCATTCTTAATAGCTTCGGTATTAATGTCTTTAAATCT
AAATTATTCTGCATCAAAAAACAAACTCGATGAACTCAACGCCACCAAAGACCAGCTTTTTTCTATCGTAAGCCACGATTTGCGTTCCTCAGTAAATGCTTTGAAAACT
TGTGTCTACTGCAACATCTTCGGTCCAGGCTATCTGCTTTTCCTCACTGCGCCTTTGCAGCAGATCAATGATCGCTTTTAGGCTTTTAGGCGCTTGCCCTTTGAAAGTT
CAGGTCGAGAGAGTCGCCATTCACGAGACGGACGGCAGCAAGTTCATGCGCCTCCACGGGCTCGTCGGCTCCCTCGGCCTCACGGCGGTGAGCTGCTCCGACCTGGAGC
GCTTGCTGAAGGTCAGGACGAAGGCCACGAAAGCGAATGGGCTAACGCCAACATCAAGGCTTACCCAGTTCTACGCTACAAGCAAAAAGACATTGACGGTCAGCCAGCG
GGTCGAAATGAAGCGCATCAAAGGCGGCAGATTATCACCAGAGCAAAAGATTGGATAAATTATCTTGTCTCTGTGGGTTATGTGTGCTTTATTTGCTCTGGCGCTGAAG
GCGGCGTAACTTCAGAACGCGCCCGTATCGACAGCAGCGGGAACCTGCTGGTTGGGACGACAAGTCTGGGTGGCTATGGTTTGTCCATCGTTCCTGATCCAACAGCGGC
GGTGCCGTCATCCGGTGGCGCCGACTCAGGCAGCGCAGCCCACTCGCCATGAGGAAGCCAGGCCTGCTGACCAGAAACAAAGATGTTCGTGCGCTTCGTTCTGAACTCT
GGGCTGAGAACGCGCGGCTGCGTGAAGAACTTGGCCCGAATGTTTGAGGAATTACCGAAAACAACGTGGACATCAAAAGACGTTGCTTACGTTATCCGCAATTATACCG
CATTAAATGGCATTTGTTTTTATTCCTTTTTCCTTTGTTTAAATTAGAACTTGCCTACGATTTCGCTGAATGCGACACCGGTTCTTACAGCAACGAAGTTGAGCTGGAC
GATGCGTTTCTTGAAGCATTTGAATATGACAACTTGCGATTTAAAGATTTTAGGTGATCCGTATTATATTAGCGACAGCGGAGTTGGTAATTATACAGCGCAGACAATT
GCGACTGTAGGAACATCGCTAGACAAAGTAATGTCATGAACTGCACTACTGATTTTTGAATAAAACCAGCAGTCGGCAACATAAGTTCCGTCAGCAACAGAAGTAAACG
TGGTAAGGCAAGGGGAGTAGTCCGGGTAGGGGAGGCTCCCTCAGGCTGCCGGGTAAGGCTCTCCGCCGTCCTTTTTCGCGGGGAACGGCGCAGCGGGGGCTGAGTGGCG
GTAGTTCTCCAACTCCTGCTCGTTCATGTCCTTGATACGAGCCGCCGGTCCTATCTCTTCCTGCATCTCCCCGCTGATCGTCCGCATCAGATCGCGCTTCTCCACTCCG
ACAATATCAAAGAGCAACAATAGCATCAAAAGAGCAACAACAATATCAAAAGAGCATCATCAACAATATCAAAAGAGCATCAACAACAGAAAACATTAATAACAAGGCC
TAAAATGGGTAAAAAGACATAAGCTCTCTTTTTTTCTCTATTATTTAGTTGAATTTGCACTTTCCATTTTTAGCTTTTTTTTTATTAAATTTAACTCGACTTTAAAGTT
AAACTATGCGGCCAATTTCAATTCGTTTATAACTAAAGTTTTGTGACCGGGCTGTACCTAAGTAGTAATCGCTTCGCACCAACACTGCCACCAAAATCAATCGTCACTT
CTTACTATGGGGCGGGTGTCGAGCTGGGTTCGGTATTTGGACGTTGGGGAGAGGTACGAGTCGGTGCAGTAAGAGCGCAGGCGCGCACTCAGTCCGAAACCCTGTTTGT
GCTGTGCGGTGGTAGATCACCCATGCTACAGCGGCTTGGCCTTTCCCAACGGTTCGCCACGGGCCTCGAAGTAGATCGCTGACGCAACGCAGAAGAGGGCGGAGATCAT
TCTGTGATTGACCAGTTGTGGAAGCTGTTTGTTGTGCAGAAGATCGTCGGGCTTGTTACTGGTGCATTGGGTGGTGCAACTGGCACACACCAACAAGCTTTTCGCCAAC
ACCAAAGGTCAAAGCCTGAATGTTTTACCTTCGCACCAACACCAAGTTTCTGTGACACATAATCCAACTTGTTAGACGGGAAACGGAAACGGGACTTCACAACACGCAT
TGCGATCGGCGGCTGATGGCGTAATCTGCCGGCTGTCCTGGTTGCTGGCAATGGTGCTGCTGAAATAAAGTCCGCGGTCGGTGAGATCGGCGCCAGATTCCTCCATCAG
AATGCAAAAAGGCACTCTGACGGATTAGGTCAAAATGCCCTCTTGTGATTGTTGCTGTGGGGCCTATTGCAGCCCTATTAGGGTGTTAATATTTTCAACCTACCTCATT
AGTAGGTCAACTTATAATCAGTGATTGTTGGCGATACGCGGTGATTTACGCCATCGCGATCGTTATAGTCCGTCATTACGACAACTGCATATTTAATACCGCTAATCAT
GACGCCGAGCAGGACGCGATCTGGAAGAAACTGGTTGACGGCAAGCTAACGCCCCCGGATACGTGGGAAGTGGCGCTGTCCGGTGGCGCCGACAAGAAGGCGACTTTCG
TGTAGCGGGATCTGAAAATTTTGTTCCAAAGCCAGCACTACTCCAAGCATATGCGTTAATATATGGAGATGATGAATTTGCAGTGCCTATTGATGCGCCATCTAAAGTG
GGAGCCGGGCTCCTGCTGCTGGTGGAGAACCTGCTGCTGGAGCTGCTCCTTCTTTCTTTAATTTTTCTGCTTTCTTCTTAGCTTCTGCATTTGCTTTTATGTCATCTGC
GAGTTGAAGTCGGGTCTAGACGACGTACACAGGTCCCGGTGCCTCTCAGCAACAAGAGGTACACTACCACCACCCCGGTGTACGCGTCTAGACCCACCTCGACCCTTCG
AATGCAAAAAGGCACTCTGACGGATTAGGTCAAAATGCCCTCTTGTGATTGTTGCTGTGGGGCCTATTGCAGCCCTATTAGGGTGTTAATATTTTCAACCTACCTCATT
CATAAAACTTAGTAATGATTTGATACTGCTGTGAGGGTTCGCGAGTTGTTACCCAGTTGTTTAGTTTAGTCCCGGCATCAATTCCGTTATGTGATACCAAAAAGCCTGT
GAAATTCAACCGTTGCAAGTAAAGCCGGCCGCGGAATGCGGGCGGCTTGGCTGCCGACGACGTTTATGCGCCTGGTGCGGAGATTCCAACTCCATGCGCGGTCGCGGCC
AAGGCATTGCGTCCACTGTTGTTGGCTCGCTTGTTGATTATGATTCGTATTTAGGCACAACAGCTTTAGCACCTGCTACAGGTGGTGTTGGTTCTGTTGCTGTTGCAAT
GATCTGCAAACGCTTTACAGTGCTCGGGCGCATATAAACGCGATGCGTTATACGCTTCGCGGTTGTTAAGTCTGTTGCTGCGTTATTGACGATGAGATCGTCCGCATCG
AATGCGACCGTGTTGTTGTCTGGACTCATTGGCCAGCTCCAGAGCATAGTCCGCAGTCATCATTTTTAACTGCTACGTGCAAATGACTTTGCAAACTGTTTGCGATTAT
CTTCCCATAGCAGCTATTGCTAATTTTTTTGAACAGATTTTTGTCGAAATCTGACGATGCTTTTTTCTCTCTTCAGTACACTTCAGTATGAAGGGTTTTATAAATCTTT
CGCCTGCATGTTTTGCTAACACACGTTGTACCATTCTAGTACCTGATTTTGGATTATATTCTTGTCTTCCTGTATATTCCCCGGTGTCTGGATCTTTTTCATAATCAGT
CAGGTCATTGTGTACTCCATCAGTTTTTATTGTCACAGTATCATTGGTGAGGGTGAAGTTCTTTTCTCCTGAGTAATTAAGATAAACATACGCATTGGGATTTTTGCTT
GATTACTTATTTTATAAATTACAGGCATATATCATGAATTTCTTCTCCAGCCGTATCTATTAGTTCTATTTGGTAATTCATATTGACCAAATCTCTTTAGGTCATTTTT
GCGCGAGTCCGGCCGCCAGGTACGCGCGATCGTGCTGACCGGCGACGACACGTCCGACACGGTGATCGGCGCCGCCGAACGCCAGGCCGTGCGCTACCTCTCCAAGCCG
GGGCGACCTGGCGGGCCTGTCCGCCAATGCCCCTATTGCCTACGCCGCCAACACGTTCAGCCTTAACGTGGGCTCCGGCCTGGCCACATCGGGCACCACCTTGGTCGCT
TCGTCATCAACAAAAAACCACCTTGGTGCTTGTGAATGCCAGATTAATGTATGCCCGATAATGAACATGTTATTTTTTCTCCGTATTCAACGAACTTATCAGCATCGTC
ATCAGTCAGCCGAGCACGATGCTTTCTCTGTTGACGCCCGAATACCAGAAGCGCATGGTGCAGGAGATCTTCCACGAATCTGTTACGAACGCGCCGCAGTGGAGCGCTT
GCCATCTGGTACGACGGTAGTCCCATCAGTGCTGCCGATTTCATCGCGCAATGGAAAGCGCTCAACGGCACGAACCCGGCTTTTCAAATTTCCAGCAGCAATGGTTACG
ATCTAACTCCTATTATTGATCGACTGAGCAAACAGCGTGAAAAACTTCAAAAAGAAGGTGGATTAAACTTCGTGGAATGCTCAGCAATGAACGTTTTGTTGCCAATGCT
GAAATAATAAATTGACGTATGAAAGTAAAGCAAGTATTAAAATGTACGGTACTTGGTGTGCTCCTTGTAAGGTGTACGCACCCGTGTTTGAGAAGGTCTCTAATGAAAT
TCATGCAACCGGTAGCGCAAGGTGGCCCCGAGATCAATTGGAAAATCATTCTTTTTAGCCCCCCATACCGAAAAAATATCCTGGCGGAAGGCACATATTGAAGATGAAT
TCTTTTTTTGCCTGCTCAACCAGTGCTCGGTAATCAGCTATTTCTCTGCGCTGTTCATACCAGAGCTGAACGCTCGGGGCGAGAGTGAAAATACCAATTAGAATCACCG
CGTTAGAGCAGCAAGAGCCGCTGGAAACACTGCTCTGGAATTAGCAACTAGACCAAATTATGCTAACATGAGTAGAGGTGGTCAAGCAGCAGCCCGCGCCGGATCTGGT
TGATTAATGGTAAACCCATCGATCTTGCAGAACAGGCAGAAGGATTTGATGCTGCATTGAAGGCATTGCACGAAAGTTTCGATACTGAAGGGATTGTTCTTTGGGGTGC
GGCGAAAACGTCCAGAAAGTCTCCAGAATAGCTTCTGGGGTGTCTCAGAGGTTGTATTTGTCTTGGACTGACATGATGACAATTGCTGGTATCAGTTTTGCACCAAATG
CACGGGCTTGATCCAAACAGATTCACGCGAGCCACATATCAAAAAACAGCATGGCGGAGGGGCACCTTATCGCCGCAGCGGCCGCGGCGTGTGAGGTAGGCGGCCGCCG
GAAAGCCATCCTCTTTCGTAAATCTCGACGACGTGCTGTTCTGCATAGCGGGTTCCGTTGCTGTCGGTAATGGCCGTAGTGAGTGTGTACCAGCCGTCTTTTTGCCACC
AGCCTCTCCTGAAGAAGCAGCACAGCAATATATGTTAAGCCGTCGTAATTTATTACAACCCGGATTAGATACACAATATAATCAAATTAAGTCGGGATTGCAAAGAACT
CCATAAAAGGCGCCTGATCTGCATCAAAGCGGATAAAGTTTCCGACGTACAGAGTGGCTACTTCTGAAAGTAATGACCACCGGCCTTTTAACATAGCGCTGTCTTCTCC
ATTTTCTTTCAATAGAGTAATTAGTCCAAAAATGTTTGCTGTTCCAAACTTTATATCCCGTAATAATTTAAGTATAATAGGTCAAACCATAAGTTTAACCTTAGCTTTC
CCGACCTCGCGATGGCCGAACAGATCGTGCTCAACGCGAAGTGCCAGCGCCCCAGCGCGTGCAACGCCCTCGAGACCCTGCTCGTCGACGCCGCCGTCGCTCAGAAATT
TAATTAAAAAGGAGGAAATAAATGAGTCAAGCAGTTGCTGGAGTAGGAACCAAATTTCGGCGTTGGAATGGATCCAATTGGGTCGACATCGCTGAGATTAACTCTATTG
TCTTTATATGTCAATTTGTGGAGAGAAGCTCTGATTTGGGCAAAATTTCTGATGTGAGACCTGAAGAAATTGCACAGTCCCATAAATTGTCTGACCTGGAGCCTATGTT
CGACGACATGCTCCCGTCGGAGAAGCTCAAGAACTACATGGAGCGCCGCGTCATCGAGATCGTCCCGCTCGCGTACATGCGCGGACGCACGCTCAACAACGCGTTCGTC
GAGCTGATCCTCGAGCCCAAGGGCACGGGCACGGAGCTGACGATGATCCACTCGGGTGTGCCTGAGGATCAGGCGAAGTCGCTCGAGCAGGGCTGGCAGGACTTCTACT
TGAAATGATCGCCGCTGCGCTGCCTCATGCAATGCGCGAATCAGACGAGGACAAGTATCGCGCCATTGGCGAGATCATCTGCATTTGGGATGAAATGCTCGCCGCCCAC
CGATCGCCGGCCAGAGCGGCGGCACGGGCAACTTCACCACGACCATGAAGCCCGAGGCGACGCTCTCGGCCGACAACGCGATCATCGTCCCCGAGGCCGACGGCGACGT
ACCTTGGATTCGGGGAACAGACCGAAGCCGCCAACGGGTTCATCGACTCCCTTGCTCGACAAACCGGCATCGCCGACGACGCCCTCCGGCCCGCACTCGACCGGCTCAT
CCCTCTGAAAATTTAGAATTCTCTTACCATAATTTCTTTTCTTATATATATCACAGAAATTAATCTCTGTAACTCACCCACTCAATTGTTATTAATTCACTTGTTATGT
CAAAGAGAGAAAGACATATCGCAAATATCAAGATCGAGCGAGTTCTGATCGTGGCGCGAAGTCATCGACGAGACAAAAGTTATTGCAGTATATGAACCTCAGAATACTT
GCTTTACGCACCATCAAAAAATAAACCGTTGGCGTAGCAATTAACGAAAGCAAAACCGATAGAAACAATGCACCAATAACCGCAATAGCTAACGGCTTTAACATATCCG
CGTGATCGTCACACATCCTCTTCCAGACCATTCTCTTGATTATAGCAAATCTCTGAACACGTCTTTTGTGACGCTTGGCGATTACAGCACGGTTCCTGCCCGTCACAAG
GAAACCTTTCTACAAAATATATGTTTTTATATTCTTTTATATGTTTTTATTCCACATCAAGCCCGTCAACTTTCTTAACAGTAGCATTCAACTGCTTCCAAGTAACACG
CGGGAGCGGAAAGTCTGTTCTCATTACGGAACCTGCCTTTGTGTACTGTTACAAAACCCAGTTGCCCGAAGGATTAAAAACAACCAAGTGCTGTTACAGCTTTCCGGGG
GAAAAAAAGACAAACCGTGACCAATGCAGCATTAGAACGTGCTTTTATGGCGATCAGTCGTGTTGAACAACGACTTGGCGAATTGGAACGTGCAGCACCAATGAATAAT
GCTGGCGCGACCGTGTGCTCGCCGACGCAACCGCGTTGTCTCGTCTGTCCGCTTCACGGACAGTGCATGGCAGAACGGTCCGGCCGCCAGACAGCGTATCCAAAGACGG
GACCCGTGGTCGGCTAATGTTGTGAAGTATATTCTCCGATTTCCTTACAAAGCAGGTCGTCAGGATTTAGAGAAAGCACAACACTACATTGAGTACCTTATTACACACT
AATTCACTTAGTTCTTTTCTTAGATATTCGATCTCAGCTAATGCCGCGGCATAGCCCCAGGTGGATAAAACTAAAGCGGATAGTTCGAACGGAACAAGATTCCCGCACG
AGCATGCACATCGATTTCGTCGTGGACAAATCTTTGGTCCGCGGACTCGATTATTATACCCATACCGTCTTTGAACTGGAAGCCGATCTGCCCACCCTGGGCGCGCAGG
GGATTATACATTACTTAAATTTATATTTGAAGCTTTTCCAGATAATAAATTTAATCTCATGGATATATTTAATATGTTTGAAGAATATCCAGAACTACCTTTGATAAAT
TTTCCGCTCTGCCGATGCGGCAGCCGTCCGTCAGCATGACGTTTTGCAGCGTGGCTCCGTCAATCACGGAGCCGGGTAAGAAGCGGGGGCGGGTGTAAATGGGGCGCTT
TCCTGGAGAGATTCAGCATGCTCTACTTCATTCCCGTCAGTGATTGTGTATTTCATATATTAGTCGTATTTGGTTGTTGCACGCTTTCATGATAGCACTAGTCTTATGA
GCCGCATGGACACATGCGTCGTGTCGATGTTCCACAACAGAACCTCGGTGTTGGTGATGATGTCGTCGTCCTCACCAAAACAGGACAGGAACAGGCCGTCCCTNCGGCC
TAAATGGAAAGGCTCTTGGTCTGGAGGCCGTAACAACACATTGGCGGCTGGCACTCATGTCATTAGTGGTCATACTCACCATTTAAGCGCTATTCAATACAATGATTAC
GGGTGCTTTTGTTTGTGTTGGAGTTGAAATAAACCCGTTGATTTTTTCTATAATAGAATCAGGTGCGATGACCTGATCCCAATTCGCTAGCCTTTTTTTAATGAGATCG
CATTCCATCACATCCTAATTTACCGGCAATATGTACATTAATTTTCATATCTTGAAAGGATTTACCAAATCCCATCCATCTAACCATATCTGCATGGTACTCAAATTCT
CCCAAGTTTTGCAGGGGCGCTTGCGCGATCACGACCCCCTCCCCCAAGGGTTTTTTAAAGAAAAAATCCCAACTTTTTTTCGGGGAGGAAAATCTTTTTCAGGCTTCAG
AAAGTGACATATGTACTTGACACTGTGAGAACGATGCGTTTGGAAGGTGAAAAATACATTCTTTAGACAATGAAACGATATACCGTCCGAAAAAAAGGTTCAAAACATC
GATGCACTTGATTGCAATCATGGGTTTCCAAAATGACCGTGGTTTGCTAATTAACGTAATGCCTCGCTCTTTAGTGGTAGCTCGTCAAAACTGGTACAATGCAAATCGT
AATTCAAAGTTCTTTTCTCGTTCTTCTTGTCTTATTTTTGGATCTAATAACTCTTCCATATGGCCCTGAGACACGCAACAGGGGATAGGAAAGGCACACAGGGGATAGG
TTGTCTTGACTTCAAGAAAGAACACTTGCATGATATATTCTTACATAGTATACTTTGTAAAGTGTATTTGTCAGAATAGCATCAAGAAGTGTTGATTGCTCTGCGTTCC
AAACTGCAGCCCATCTCACACATGATCTTGAGTTGAATGTGCCTGGTGTCGCATTAGCACTTGACCTGCTTGATGAAATCGCTCAGCTGCGCGCTCGTTTAAAGTAAGA
TGTGCAATGTCTGAAGTCAAACCCATAAGCTGGTCATTCTCTAGTCTAAAAGCCTATCAGACTTGCCCTCGCCAGTTCTATTCCTACAAGGTCGCCAAGCAGTACGTCC
GACGCATTTGAGAAATACTTCATCCTAAGACAGACTGGAAGTGCTGTAGTTGAAGCTATTAATGAAGTGGCAGATGAGTTCCAATGTAGTGTTGGCGCTGTTTATTCAT
TCAACAATTTATTGTATGATATTAATGTATAATATTAATATATAAAATGAAATGGAGAAGTAATAATGAATACAGATAATTTAGTATAGCTTATGGGGAGGAAGAATTT
TGGTGGTCATTGGCTGTCTTTTCCTCATCATTCCTATCATCTACTTCTGGCAACTCTGGCGTCCGCGTGACCGCCTGCTCCGCAAGCACGACCTCGAGATGTCGAACAT
TGGTATTAACATTACTTAGAAGGATATTATCATGGTAAAAATATTTTATTATCTGATTCAAAATATCAAGGAGGAAATGATTATTTTTGGGGATAGAGCTTATTATTTT
GGGGCGATCTTTCATTCGCACGAGCATGATCTGCACTTCAGTAGAGCAACGCTTGATTAAGAATTTTCAATGAATTTCATTTCTTCAACTCCAAGTTCATACAGTCTTC
GGTAATGATGACCGCTTCCTCCCAGGCCACCCCGAGCGAGGTCAGCGCCAACGGCAAAAAGGTTTCAACCACACCGATCCCGGAGGGGGTCGGTGAAACGATCAGGAAC
GATTGATACCTCAAAAGGCTTTGAAGAAACTGAAACTTTTACTATTCAAAATGTCGCAGAGCCGCAAGGTTTAGCGAAATTTTAAAGGTTTTGATTTGGTGAATGTTTT
CATTTCTTTTCTTTTATCATAGCTATTAAGTCCAAGTTCTTCAAGATAATTACCAAATATACGATTAAGGTAAATATTTGCAGAACTTCTTGTTAATTTGAATAATGGT
CTACTCCTACTACTTCTACTACTACTACTACTACTACTACTGCTAATTACTAACTACTACTACTACTACTTCTACTACTACTACTACTACTTCTACTACTACTACTACT
GATGTTTTGTAATTGAACGAAAGATTTATCAACGAGGCAGCATAAATGGCAGCAAGACGAACGCACGATTTGGCGGTGGTAGTCCGCGAGTATCAGAACAACGCGGGCG
TATGCTATGACTGCTCAACAAGATATTGATCAAGGTCAGAATCCATTGATGCAAGCTCCACAGCCTATGCCACCTCAAGTTGCTGAACCAATGCAGCCTGAAGCACCTC
CTTGGCCGGCCAGATCGTCAGCCTGACGCAGCAGGGTGGTGGGAACCAGTTCCGGCCCACCGGACGCGATCAACTCGCGGGCCAGCCGGACGAAGTCGCGGAACCCCAT
CACTTCCATCGCCTACCATCACGCTTAATCTTTGGCTTTATAACTACGCTCATCTGCTTTAAATCTCCCACCAACTATCTTTTTCCTATTCTTGTTGCTTGTCTTTAAT
GACGCAGCACGTTAAGCAGGGCGGCGCCCCAAGGCTGCTTATACTCTGTCGGAGCAATCGGAAGCGCCGGAACTGCTGGGTTATTTAGCGGTGTAGTCATTACCGTCTG
CATTACCGGGTACCTGAATTTGCTGAATAGAATTGTCAACAGGCAAATGGAAGTATTAAAGGCTGAACCTTTTGAAGCAGGAAAAAGAAATTGTGAAATATTTTGAACT
AATAGTTTATGATTGTAGATCCACTTGTGTAGAGTCTCACTACCATTACTAAAGCAATAGGCGGCAAACACAACAAATGGTGAATAGGGCAGGCACACGAGGGGATAGG
TAAAAATTCCTAGGGCTACCTTAACTCACCGTCTTCATACCTACAAACTAAGGTTTGGCGAGGCGGGACCTTCAATCGAATCCAAAAAGAATTCACAGTCCTTCCGCTT
GTTTCACCAAAAAGTAGATAAAAGATACGGACACACCAAACGATCATGGCGATTAGAAGTGCTGCTGCAATAAAGGCAACAGCAAAGTCCCTCATGTCTTATCGGCTTT
AGGTAATACATAACAGAATTGATGATATTGAAAAACAGTTGAAGGCCATGATGCAACGCTCTATGGCAAGAATCAAGATGGAATAACATATAAGCAAAAGGAATGTATT
GAGATCGTCCAGAATCCTCTGGTTCTGTTCGTGTTCGTCTGATGACGACTAACGGAACTCGCTGGACTACCGTCAAGTAATCTGGTAAAATAAATAACCTAACTAAACT
CATATTCCTGATCGCAACCGACGGCGTCAGAACTGGCGGCAAAGGCGGTCACCACTGGTCTTGACCTGGCGAAGGCGCTCGCCGCCAAGGTAACGTTTTTTGGGNGTCG
GCTTATTCGTAAACAGAAAGCTTGAGAATATATTGAATCTAATATTCGTCAGGAAAAAGTAACTACTTAATCGGGTTCATAAGGATATTCTACAAGAGCTTCCTCATTT
TTTTTTGTTTCATTAAGCGAAAGAACTGGCTAAATCGAGTGGAGGAACTATGTGTGAGTTTTGAATTGTCCCGAAATATTTTTGAATTAGCCCCTTTGCTTTCTTCTCC
CTTCTGCAATACTGACTTGCGATAATATGGCAGCATAATCAATATAGTCTATGAATGCGTCGTTTTCTTTAGCGCGATTTCTTCACCAATATTACTTAAACTAAATGTG
GGATAAAATAGCCTCGGGTCTGTTTCGACTTACAAATTTAGATTAATTTTTATGTTATTAAAAAATCCTTTAGCTATACTACTTTGCNCAAAAAATCGAATACATTTGC
CTGCGGGTAGTGCTCGCGGTAGAAGCGCAGGATCGGCCGGGCCATGGGCAAAAGGGTTTTGTGTAGAAACTCCTCGTCCTGCGTCAGGGCGTAATAGTCGGCCATCATG
GCAAGAAACTCTTCCCTACTTACTGGATGGCGATGTGTTGCCTTAACAACTTCATCTTTAAATCTTGGCCTACTCATACTTTCCTCTCTTTGTTGGGTGGCTGGATGAA
TATGAGGGCGGAGAGTTTGATTGAGAAAAGCGAGAGGCAAATGGATAGCGAGATGGTGGCTGAGTTTGATTTAGAGGACGCGTACTCGATTTTGTTTACGTCGGGGACG
AATCCTAGGTAGGGTGTTTGCTGAGAGCGCGTTTGGATCCGATCTTGAGCGCCAAACCATCGCTAAAGAAATTTATACGAGAGTTATAATGGATCCAAACGTTCTACCT
GATACCCTTCGAACGAGACGTATACGTCGATCTGGCCTTGGCATACAAGAAACAGGTCGAGGAAGAGCTAAGGAGCAAGAATGGCTGAAGATCAAGCCAAAGAAGATCT
GAAGAGAATCGCCGAGAACATTGGCCTGAGACAGTGACTCGTTACATGACGTTCATGAATAACCAACTCATTAAGAAGAATGGTTATGCAATGGGTAGCACCCTGTACG
CAGCTTCCTGCGGTTTGCCATCGATGTACTCGACGTTACCGTTGTGCGGACCGTTGTACTCGAAGACTTCGCCTTCTTGTCGAAGGGCGTTGTCGATTTGGCAGAGACG
GTTCAACGGTAGCGGATAAGGAAAATTTTGCTTATCGTCACCCAGAGTACATGCAAGTGCTAGACGGACTAAAGTCTGCTGTGGAGGAGGCTGAGAGGCTTCGCTGGAT
GACACTAACTTCTTCATCGGCTCTAAAATGATATCTTCAACTTAAAATGGTTAGATGGTTCAGATAATATAGTTTTACCAGTCAACAGAATATAAAGTTGCTGATTATG
CGTGTCTCAGTTTCGTCAAATAAGCCTCTCCGCGTTTCTCTTCAAACAGTCGACGAGACGACAGGTCTTCCGACGGGGACTATGTATAAGGGGTCTGTCCAGGGCGTCT
CTTTTACTATTAGAATTCGCAGTTTTTCGGCGTTCTCGGGAAGGAGAGCACATCGCGAATGTTGTCCACACCCGTCACGTACATAATCATCCGTTCCAAGCCCAGACCG
CAAATATAAATATATTTTGCAGTCTAAAAGTGTAGGTGGTGTAATGCTTGATTGTCTAAAAGGAAAATTTGCGTCATAAATTACGTATGTTCCCGCTGGAAAAACAGCG
CAGAACTTATGTTGCTAATTCCATATTGCCTTTCTGGTTCAGAGACATTTCTCCATTCTTTTATAAAAGTATCATCTTTACTATATTGATAAACCTTTTTATTCCTGCC
AAATTTTGTTTCAATAGATTGTCTGCAAGTAGGACAATCATCATATTTCTCGTAAAATTCTATGTCTTTTTTTAATTTACTTGATATTTGTTTTCTTATTTTAGTATTC
CTTTGTCAAGAGCCTCAGCTAGTTTATTATCGCCCCCACCTTCCCCACCCAAAGTTGGGACTATTCCTGTAGGAGTATCTTCTGGAGTTTGCCCAAGCTCACTAGCCAT
CAGTTTAGAGGCAAGTCATGAAGTAATGAAAGAAATTTGCGGTTATGATACTTGGAAATATTCGCCAAAAGATTCAAGAATATGTTTTGAAAAAAACGCATTTTAAAAT
TATGGATTGATTGGAATTTATCAGCGTTTGTAACTTTAGGACGCTTTAAAAACAAAGCTCGTTGCTCTTCTGGCGTTCTGAATACATACGCAAAACGCAACCTGCAATT
GATAGATCGTTTAAAAATTGTATTGTCATCATTTTCGTAGACTTGATCAAGTCTGATTTTTTCATGCTCTGCAACAATGGTGGCTTGATAAATCCATCCAAAACGCTGC
GGTGGGTTATGAAGGGACGGGCCGTGGCGCCGCCAGGGATGGCTTGTAAGATGGGTGTTTCAACTTCCAGATAACCATGGTCGTTAAAAAATTCCGCATGGTGTTGATG
GCGGCGGTCGCTGGCGGCGCGGACGCGGATATCGCTCATCAACACACTTACCGGCATGGCCATAGACGCCGATACGATGCGGCCCGTGCTTGGCAATATCACCGGTGGG
AATGCCGTCAATTAGTGGTATTAATCCGCTTTGAAATTTGTTTGTCTGTTGTCGGTTAATAATTCCAAATAACTCACCTTGTTCAACTTCACCAATGCCAGGCACAAAT
GGACGGTGGTAGTGATTGGTGTGATGTTATAGTATTTGGAAAGGTCGGAGGAGAAGAGGCCGACGTTGGTGCCGACGACGGCGGCGCGCTCGCCTTCGATGGTGCGGAC
GAGTTATTCTCATTTAATAGTTCCATTTTCTTTTAAGATTTTAAGACAATCTCTGCAATAATATGTATATGATAAACAACCAATAGGTGGACTATATTCTTCTTTTGTT
CGTCCGCCTGTGCTTCGGCCATTGCCTCGGCATCTACGGCGACTTTCACGCCCTTCAACAGTACGAAGTCCATGAGCGCCCGCGCCTTTTCGGACTCGTAGACCGCGAG
CGCTCTGCTGCACCGAAGAGCTCTAGGTCTCTCGCCGCTGCTTTTCTATAGGCATTCTGAGCCGCTGCGCTAGTCATGAACGCATAGTGCTTCTGTAAGTTCTCAAGCA
TGTACGAACCCACTGTAAACGGAACTAATCTATTAAATTCAAATACAATGTTATTTTCAACTAATTCAACGTTGACGATTTTCATAGTAGAATCTGAGAATCGATAAAT
TGCAGATAACACATCTCCTACTACATATCCATTACCCGCTGTTGTTATCGTCACACTTGTAACACCGCCACCCGAAACAACGATAGTTGCTTTTGCTCCTGTACCTTCG
TAAGTGCCGAGCCCACCGCAAGCTGGAAGTCTTCAGCATCCTTACCGTGAGTGTAGTAATAGCCACGACGCACAACAATGGTGCCATCCTTGCGGCGGCTTACTTGGTC
CGCGGCGGGTGAGGCCACGGCTGTAAAATCCCTTGTAGCTGTAAATACTTCCGTTCCAATGCCGTACGCCGTCGTTGCATTTCTGTTGGTACAATTCATCCAGCAATTC
GAAACTAAAATGGTACAAGTTGCGAATTTGATGATTGCCTTTCCTGATCAAGGCCGGCGTGAACAAGTTCCGGAATCCTGAAGTTCAACAGATTTAGGAGTCCATAGTG
ACATCCTCGCCATCCGGCGCTACCGAGGCGACGACACGATGGAGGTCGTGGGGCGGGTGATCGACGTGATCGAAGAGTTCAAGCCCAGCCTAGTGGTGATCGACGAGGG
CGATTATTCATTGTTTGCCGTTTACAACCCGACAACTGGAGTTATCAAGCCTCTTGCCTCTTTGTCTCGCACAGCTCCGACAATGCCAAGCGGGTTCACAAAAAAGAAT
GGTATGCAGCGTATAGATCGTTGATGCGTGGAACAGCCTTGTTTGTACGAAGTTCTGTTACAGCCTTACGGATCGCAGCAACAGACATAGTGTCTGATGAGTCAATTGT
GAATTGCATCAGTTTTATTTTAAGTTCTTGATAACTCAATGACTCGAACAAACAAATTCGTGACTTTAAGAATGGATAAATATTTCTTAGGATTAAAAAAAAATTAACT
AGTGCGTAACCGCCCATAGCAAAAACTCGGAAGGACTATTCCACATTAGCTTTTCACCTCAATTGATTGTCTCACCCAATCAGCATGGGCTTCACGCTCCAAAATGATT
CGGCACGACCAGGATGCACCAGTGACGGCTGCCCAGGTTGATGATGAACACAAAACCACAAACTGCCTGCAGCGCACGCCACACCCACGTGCCGCTGGCCACATCAAAC
GGACGCCGACCACGGCTTTTTGGGCGCGGGGACAGGGGCGTCGGGGGCAATTCCGGCAATGCGGCGCAGTTCGTCGTCTGACAGCTTGGAAAAATCATCCATTAGGTGC
TGAAGAAAATTTGTGGTTGAATACCCGCAATGCGATGGGAAACAAATTAAGGGAGAGAGAAATGAATAACGAAAAGATTCTGGAGATAGCTGATAAGTACGATACTGGT
GGAATGGAGCATAACGATGAACGACAAATAGTATTCTCATTTTTTCTACCACAAATGTTTCCCACCAGTCACACAGATTGTTCATACTTGTAAATTCATTAGGAACATT
AAGGCATTGCGTCCACTGTTGTTGGCTCGCTTGTTGATTATGATTCGTATTTAGGCACAACAGCTTTAGCACCTGCTACAGGTGGTGTTGGTTCTGTTGCTGTTGCAAT
GCTGGTGCTGACTTTTTCTTTATCGTCTGACAGATTCCAAAATAGACATGATCTTATACTCCTGCTAATGATGGGATGAACTGGACAAGCGGGTTATGGCCTTGCTCCA
CAAACGATTTAACTGTTGAAATTACACAATTAGGACAGGACTTAGACTTTGATAACTTATCACGTGGAGAACGTAATAGACTTATTTTAGGCATGTCTTGGGCGTTTAG
GTCGCGCGTGATCGACGCGTGCCCCGCCACCATCACGCCTTCGCCGATCCGGCAATACTGGTGCACCGCCGCCTCCCGCCGAGAAAACTGTGATCGCCCACCGTCACGT
CCTGCAATAATTTACCGTCATATCTTGCGTACAACAAGAATCCTAATTCCATTTCATCCATGAATCTCTCACGCAATGGCACAAGGACATTATTTGAAACTTGACGAAT
GCTTATGAGAGAGCGAGTGTAAGATACCGTTATTTTTTTTTTTAAACTTTTTACTAAGACCAGATGTGTGTGTGTGTGTGCCTCCTTTCTATTTTTATTTGATGATCTC
GGTACTGTAGTGTTCACGGTTGATGGTGTTGACCGTACTGTGACCTTCCCATCTAACTTCTATGTGACTTGTGCTGGTGTGTCTCGAATTAAATCAACGGGTACGACCG
TATAGTTACCGTGGTTCCGTTTCGATACTCCTCCATCACTCAAACTTCCTGTTGAACTTGCAAAGCAGGACTTGATTCACCTGACAAGTACGGACAGCAACGTGATCTT
GTTTCACCAAAAAGTAGATAAAAGATACGGACACACCAAACGATCATGGCGATTAGAAGTGCTGCTGCAATAAAGGCAACAGCAAAGTCCCTCATGTCTTATCGGCTTT
TGTATCAGCACCTAGTAAACCAACTAGTAAAGTACAAGATGAGTTAGTTAAGTATGCCTTAGATTTTGTTAATTATGAAGATTCTAAAGTAGAAACTGCAAGAATTAAT
AATGTAATCAGCGAATATTGCTATGCCTGCTCCAATAATTAGCCATGTTGCCTTGTCTACAATTCTGTAAATCGCACCACGTCCTACGTTAATCTTCTCTACTTCAATG
GGGGAAAGGAAAATCATGGAAACACTGGCGGAAAACCCGCCCTTTTCCCACCTCACTACTTTCGGGGGGCACCCGTTGTCCTGTGCCGCCGGGTTGGCGGCGTTGAAATC
GCGCCGCCGCCTCGCCGTTCAAAACTATTTCGCGAGCGGCTGCAGTGGCACAGGCCGGTGACACGGTTTATGTCACTGCCGGTGTCTATCGCGAAAGGGTCATTCCCCAG
CGCCACTTCCTTAATCTTGTCTATCTCGTTGGGCGCTTCTACGTCCATAATGATTTGACGTGTCTCCATGATTGCTACACGGTGTGAGTAAGTCTTTGTATCCATTTTAT
CCAGTTCCTCGGCGCTTGAATCGACTTCCACCCACTCGCCGGGGCCGGGAGTCTTCGTGCCACCAGGGATACGAGAGTCACGGGAGCGGTAGCCAGCCGGGTGATTAGCG
GTACTTACCGCCTGTGTTGCTACGGTGAAAGCCACCAAACAGTGGCTTTGTTTCACCGCATTTTGTGCAGGTTTTATTCATGCTATTCGCCGCAGCGCTCCTGTCTCTTT
GAGGTAGAGTATTATTTATGTCTGAATTTTGGTCGGTAATGAAGAAGGTTGGATTCAAGTTCTATGGACTTGTTGACCTTGATGAGAATTCTCCACACAGAAGTAAAACC
TGGCCCGGATCCGCATCTGCAACCGGCGCCGCTCATACCCCAGCTTCTCCGGATCAGCGTTCGCCAACTCCCTGACGTCGGCCATCGTGCAGTGATGCCCCGCCTGCCGC
GGATGTTTTACCGCCTCCAGGTGCGCCGCTGATGATGTCAAAATCCGCCGGCTGCCAGCCGTTGGTGTAGGCATCCAGTTGTGATAAGCCGCTAGGGATACCCGGCAATT
CTCGAGATCCTCGCTCTGCGCGACCGCGCGAAAAAGGAGCTAGGCGCCAAGTTCGACATCCGCGCCTTCCACGACCAGGTCATCGACTCCGGCGCGCTCCCGCTCGACGT
CGCAAGCGGACAATCGAGACGGCCGCAGTGGTGCAGCAGCGCGTCGGCGTTGCGCCGACGGTCATCACGCTCGACGCCCAGCATGTGAAGAGTGCGGCGGCGGCCGTGAT
TGTTCAAACATGCCGCCCTGAACCGTGGCTATGTAAAATGAGCAGGCTAACAGCATTTCCAAGTAGTCGTCGGAAGAATATGTTTCTGCCCCTACAACTATTTCAACATT
AGTGTGGAAATGTAGATTATCAATTATAATTGAATAATACTATTTTATAATTTATCATTAAAAACTTAATATACCTTAACAAAAATTTAGAAGTTTTTAGAATATTTTTG
CGTTGACGACACCGGCAACACCTTCGCTGGTGTGCTTAACGGTCGCTTCCGTGTGTACATCGATCCATATGCTGGTGCAAACTACATGGTTATCGGTTACAAAGGTTCTT
GTTGTATATGTTCCTAATGGACCAATAATATTTTGTATTATTTCAATTACTGTATTTTTACCACTACCATACATTCCTTTTAAAATAAGTATTACATTATTTTTTAAACC
AATTCTAATTTGTGCTTTTCAATATGAGAAAGAGAAAGACTTCTGCCGTTAATAGTTCTGTGAATAAATCTATCTCTGCCATTAGTTCACTTTCTCTTTCCGGTTAACTT
TGTATTGTGCCAGATGTATCATATTTAAAAAGAAAATAGCATTAGGACTTCCGCTGTCATAGGCACTAAAATAAGAATTACCTGAACTGTCAACAGAAATCTGACTTGCT
AATTCTATCTTATGCAGGAATATCTAAGGTGCAATCCATAAAGATATTGTGTAATCCGATTGTATTGTCATATCCATTGTACAGCCATACTACATCCGCTTTCGATATAA
GACACCCGAATAATCTACGCAATCTAAACCAGTACAAGTACCTTCTTTGATTGCCGCATCTAATTCCTCGAGGGTTTCATCACCAAGTTTAACTACACGTTTGTAATGAT
GATCTGAAAATTGATAAATTAGCTGTGACGTATTAACAAAAACTGGCGTTGCATTAAGTACGCTGCCAAACACTCGCGGTTTTATATTGCCTTTAATATCACCAGCAACG
GCCGTACCGGCGCCGGTCTTCGTCAAGGCGACCGTGGTGAAGTCGAGCTTGTGGAACAGGCCGTACTGAGCGCCGACCTGCTGGGCGTAGGGCAGGGAGTTCCAGGCAGT
TATATACAATCAAGAAGATGCTACATTTTATTATTCTAAAAATAAAATAATTTTATTTATTATAATGAGCCTTTTCCAAAAGCCAAATCAAATTATCAAAGTTGGCTTGT
CATTGTCCTTTCATTTCCCACACAACCCTCGCACATTCTTCTCGCTCTTTTGCCACAGCTTCACGCATAGCAACACACGCATACCGCTTGCATGTAGGGCCGCATGAGTG
GCCCCTCCGCCATCCGCGCGATCGTCATCGGCGCCTCCACCGGCGGACCCCGCGCCCTTTCCGTCCTCCTGCCCGACCTCACTGCCCAGACCGACCTGCCCATCCTCATT
AGCAATATATTCATCAGTAATAAAGCTGGATATTATAACACTGCAGGTGAGTATAACACTGTTTTAGGAGATTCGGCAGGCTACAGAATGACTTCGGGTTCATCCAATGT
CAAAACTAAGATCGGGCAACTACCGCCTTCCAAAAATCCGTTCATGGGCCTCTTTAAAGATCCAAAACTTGAAAAAGTTAAAACAGAACCCGAATCCCCGCCAACAGGCG
TCGAGCGCCTGCGCGCCGCCGACCGCGCCCGCGCCGCTCTTCGTCTCCCTGACCCCCTTGTACATCTCGGCCGCCGCCGCTTTCGCCCGACCGTCGCCCGCCGGCGCCTG
CCTTTTGCTTTGTCGGCGATATCTCTAAAACCATTATTTTTTCTATTCCTTTTTGTATATTCTTTAACGCTTCGAGATGTTTTTTTGCTATGTCGTCATTATGTTTGTTT
TGTCTATTTCGCCCTGCTCTATTTTATTCACCAATCTTTCCAGTGACTGACGCGATGTAATAATATCACTGGACACCAGCGCAGTACGCGCAGATGGGAATCGAATATTG
TGGTCAAAAGAGTGCGCGAAGATGATCGGCGTTCGCGCTGCGGCGTAAAATTTTTGGCTCGTAAATCGTATGGGGGTTTTGGCCCATAAATCGTATGGGGGTCCCCGGCC
AATGCAATTGCCGGTCTGATTCCTCCCATCGTTTAGCAAAGCGCACCACCAGAACGATCCCGATGCCGCCGGTGACGAGCAGAATAATGGCGACGAGCAGCGTGGTTTTG
AAATACCAAAACTACCTGTTTCAGCACCATACATACTAGCGTTATTAATACTGTCCATTAAACCTGTACGGCGAATAGCTCTAATAACTTCTACAAACTCATCTTCTTTT
TAGTGTGTCTCCATCTTTGGCCAAACGTCTTTCTCTACAGTTCCAAACCCGCAAGCGCGTAACCGCCTACGTACCGTTCCTGCGTCAAGGTGACTTCTGGGTTGAGTACG
TATAATTAAGTCTTGTTTAAGTCTATCTAAAGTATCTACTTTATGTTCTTTAAGTAAATCCGCACTTTCACTTGGTATAACTATATCTTTTTTATCTTTTGTAATGGTTG
TTGGAATCGTTTGTGTAGGGTTGAAGTAAATTAAGGAGAGCTTTCCGTTGTGTTCGATTGTCATCTGTAAATATTTTTTATTCTGATAACAAGACCAGCAGTTTACTGCC
TGAAGATGCACAAGAGGAAGAAGAAGGAGAATTCTTCGACGAAGAGTAAGAATTTCTTGACAAAGGGGGAAGATAGTGTATTATGTGTGTGTTCAAACTATCTTCCCCCT
GGGGGAGGCATGTGCATATGTCGGCCGATGCCGTGGCCTACGAATTCGTGGCAGACCGCGAAACCGTGCTTCTCTGCCACGGCTTCGCAAGCTGCCCCAACCTCCTTCAT
CTGCCGGTTCTGAAGCTTTGCTTTTATTTTTTTATCAGACCGATACCCAGGGGGGACACCAGGGGTATGGCGATAATTTGAAGTATTCCTAAAAAATAGTCGGCACGGTT
GAATCGCCATTTCTGGGCGCCGGTGTCGGTGTCATACGCGGTGACGCTGTCGCGCACCATCGAGGGCACGATCAGCAGCTTGCCGGCCACGATTGGTTCATACGAGGCGT
GGGACCGTCGGCCAAATTGGTCTCTACAACTTTCTCGTCGGATGGACGGTGGTAGGCTGGTTCCTGATGCTGGCCAACGCCTTCGGGTACAATCCCGTCGCCTGGTTCGT
GATGTTGTTTCCACATTTATGGTAAACGACCATATCATTCAAAACGATCCTTTGATTGGAATTGCATTTGGCATACAAATCATAAATGAATGCACGCGTGCGCACAATTG
GGCGGCCAAATGCCTTTGCAGAGAGTAGTCCCGAAATGGGGGGTTTAAAAACAGGAACAGGGTTGAATACAAAGCGGTCAACCTAAGCGTCCTTCAAGCTCTCGCAGAAG
AGGATGCCGACAAATTATAAAAATAAATACAAAAAAAATTGCAGAATTTTATTTTACTGTTTAATTTTCGTCGAAATTTCCTTTTTTTTTAATTACGGCGAATAGTTTTG
GATCGAAAACTCATCAAGTACGAGGCGGTGCACGACATCCGCAGCTGGGCTGACCTGAAGAACCGGCTTGATTCCGATCGCCGCTGCTACGGCTTCTTCCATCCGCGCCT
GGCCTTGCGGGCCTGGTTCAAGTCTTTGCGCAGGGAGCTCTTATTCGCCACACGGCCATCCTGCTTGGCCAGCTCGACCAGGCGGGGAGGATCGTGTCGACTTCGGTATT
TACTCAGACTGCAGCTCTTCTAGGTGGTGCTTAGTTGCACCTACCCCATCTGTTGGCTGGAAATCACGAAACTTATCAACCACCAAAGAAGTTGGGGGAACGGTTCCATT
TTTGACTTTCTTTGGTTTATACATCCATCCTTCATATGAATACAGATTAAAGGCCAGAGGTCGGACTAAATTAGGAATATGATTTCGCAACCAATTTCTTTCAGTTGTAG
GACACATCCCAGTTATTGAACATCGAGGCTTCTCTGTGTCGGAAATGACGAACAACTTGATTCTCACTGTCCCTGTTACATTGACCATAAGTCCAACTGTCATCCTGCAA
CGGCCACTCTTCTCCCAGCCGCTTACCCAATACTCCACAAGTTCACCATCAGGCGTCTTGATTGTGCATTGGCCCTTGAAGTCAGGGTGGCTGCTCTTTTGCTTCCTGAG
GCACACTAATCAGTATTTGGCAGAACTTACATCATTACACTTGCCATAGCAATCGTGTTATGAGAAAACGTTGGCAATCTGCTGCTAATCGATTTGACGCTGAGACACGC
GGCGGCTGATTGAACAGCATGTAGGCGCCATAGAGGGCGAGCGCCAATCCCATGCCGAAGACGTAGGCCTGTGGGCGAAAGCTCAGCAGCAGATAGATCCCGGCCGGCAT
TCGACTGCTGCCACGCCCACGGCATCGGCGTCATCCTCGACTGGGTGCCGGCCCACTTCCCGCGCGATGCCTTCGGCCTCGGCCAGTTCGACGGCACGGCGCTCTACGAG
TAAACCTTTGGTTGGGCTTTGTATTGCCATAAGAATAATGAAATCGCCGTTAGCATCTGCCTTGCTTACAACAGGTGGCGCATCAATATCCTGTGGCAGACTGCGTTGCG
CGCCACTTCCTTAATCTTGTCTATCTCGTTGGGCGCTTCTACGTCCATAATGATTTGACGTGTCTCCATGATTGCTACACGGTGTGAGTAAGTCTTTGTATCCATTTTAT
CCTGCTGAAACTAACTGGCAACTGGTGGCATAAATGGCAAATACATATACCGCTAACTACAATCTGACGAAGCCAGAGGTTGGCGCTGCCACTAACCAGTGGGGCGGGTT
GGATCGAACAGATGCGTACCGAACAGTGATGCCGCGGGATAAGATTGTATGATCACTCAGAGCCTGACTTCGTCATTTAAGCAAGAGCTTCTCGAAGGGATTCACGACTT
TAGATACCCAGATTTCAGACTCCGGCTTACGAATGGTCGGGATCAGAATGTCCCATGACTTCTTGCTAACTGTTTGAGCTTCTTCGATCCAGCATCTATCACAGCCCTCG
AGGTGGTTGGCTTAACAAAGCAGATGGAGTTGTGTTCAATAATTGGGTAATAGATAAATTTATTGATACAGGGTATTCTATCTTTGGGCAGGATTTTGGGTTTAGTATTG
CCTGCTGAAACTAACTGGCAACTGGTGGCATAAATGGCAAATACATATACCGCTAACTACAATCTGACGAAGCCAGAGGTTGGCGCTGCCACTAACCAGTGGGGCGGGTT
GTCACAAAGTGTTACGGAGAAGTTTCAATGCCTGTTAACCATGTTTAAAAATACCAAATTTGGGAATGTTTGAATAGCCTGCCACGTGAAGGGCACTGCTGCAATAGAAA
TATATGTCGGGCGGCAATCCTTTGCCCGCGAACGCTTCGTGCTGATCCTCCGGGCGCAAATCGCAGCGGTTGCCGTCGAGCGTGAGCGGGTGTCGGTGCGGCTCAGGGAT
GGAGCCGGGGCTCCTGCTGCTGGTGGAGAACCTGCTGCTGGAGCTGCTCCTTCTTTCTTTAATTTTTCTGCTTTCTTCTTAGCTTCTGCATTTGCTTTTATGTCATCTGC
AATGAGATCAGGGAAAACGAGCACGATAAGGCGCGAGAGAGTGCCCTGCGACTGCTCGAAGCCCAACAGCGTCGGAATAGTCTGGGGCTGAAGGGCAAGTTCAATTCTCT
ACAATATCAAAAGAGCAACAATAGCATCAAAAGAGCAACAACAATATCAAAAGAGCATCATCAACAATATCAAAAGAGCATCAACAACAGAAAACATTAATAACAAGGCC
AAGAGGAACCATTTGTTTAACGCCTTTTGTCTTGCTTGAACTAAACATTAGTAATTAGACCCAACTAAAACGCCAAAAGTAGTAGAACCATCCTGAAAAAACGAAAAAAT
CATGGGACATCGTGGCTGATCACACTTTAGGCGTTTACTGCAATTAGAGTCTACAGTAACAAAGATATGGCTTTACCCCATTTTTTATGACATAATCATTTAAAGTCCGG
GCCGTTGCGTCTTCCAGTTGCTGTTGCGCCAACTCGCGTTGCACATCCACCGCACGGCTCAAAGCGTCAAAAGCGGCTTGCCACTTTTGACGGGCGAGTTCAGCCGCATC
ATATGGAACTGAAATAATTGGACTAACGGATGAAAACCTTGAAAACTTAAAGCGAAGATTTTGGAACACTACCAAAAAGAACTCCAACGAATCCTATTCCAGTATTGACG
AACCCACGCATAATAGGTGGTGCTTTTAGCAAGGTTAAAATAGGTGATCGTTGATCCTGCTACTCTTGCCACTTCAGATGCGTCAGAATATGTGCCGCTAGTATTAGCGT
GGTCCCGCCCGGCCCGGTTGCGGGGTGGGTCGATGTTCCCGTCGGACCGGTGGGCGGATGGGCTCAAGTTCCTGCCGGGCCCAGCGGTGGCTGGACGCAGGTTGTGACGT
GCAGGTGCTGCAGTGCGCGCGCTTCGGCCGCATCGCCGGCCTGCTTGGTCGTCGGGCTGTTGCCCGCTGCCCGCCATTTGGGGGAACACCATTGAACGCTTCTTTCGCCT
CAAGCGTCTCCACATCCGCAAAACCTGCGGATGGACTGACTCGCATTGATTTCCAAGACTTCAAACTGACACGACCGAACGGCCGCAAGAGCCAGGGTTGTCTTGCCGAT
GGCAAAGCCGCAGTCGTCGCCAAACGCACCGCCTGATGGAAGTTGATACCCGACGCGACGCTGTCGGCGTACGCCTTGTTGACGATGTCGGTGCCGCTCGTCGGCGCTGT
CAATACCGCTGACCTTGTAGCTCGCCTGATGGTGTCTTATGACAAGATTGCCAGACACCTAAAGAAAAACAAGTATGAACAGATAATCATCTTGGTATGCCGGGTGGACA
CAAGACAACAGGAACAATCGTTGTAAGACTTTCATAATCAGCGAAGTTTGAGGGATAAAACAAGGTTGGGGGTTAAACCGAGATAATTGACACTGGTTTCGATAATCTCG
TATAAATTTTCCTCTTTGTTCCACAAATGCAGTTCTGCGTTGTATCGATATATAATTCTTGGAGTTCTTATTGTTCCAGCTTTTCTAAGTGTTTCACGACCTCGAATTTT
GCATTGTTACCGGCTATCTGTCGCACTTTGGCAGTAAGGATAGCGATGGCGATATTATTATGCCCGGTTCTTTTACTAAAACTATTCAAGAGAACGGTCCTAATGGGACT
GCGCCGCCGCCACCTCGGGCTCGGAGAGGAGCGCCACCAGCGCGGTCCCGCGGCGAGCCGTGCGAGGCACGGACGAGAAGGCACGCGCGCGAGCCAGGCCCACCGAGACC
GAAGTAAATGATTAAGGTGAAAAACAATGGGCACTAATTACTACGCAGAACTCAACCTATGTGAATGTTGTAATCGTTCTAATAAAATTCATATATTAAAATGTTCATAT
AATTATCTTAGGTGGCGATAAAAACCAACTCACTCACCTGGAGCTTGGCCGTTTGGTTGAGAATTTCAGCTCATACTCCCTGCTGGCGTTGGATGGAGTTAGATATAAAG
GTTTTCTTTAGAAAACTTGGCTTGGAGAACCTCAAGCACACCGGGATACGCTGTTTCGGATTTGGCGGTATGTGAGAGAGGTCCAAATGGTGGTAGAGTAATGTGGTTTG
AGCCCTATGCCGGTTGCTTTTAACGCTCCGCCAAATGATTGTGTTGCAACCTTTGCTTTGTTAAGCGATGCACCCAACGCACCCAATGGTCCACCGGCCGCTTCAAGGCT
TATTGCCGCTCCACTAGTTCCTGAGTTAGAGACTGAAGCACTAGATCCTGCTGCACCTGTAGTAGTAGAACCAACAGTAACAGTAGCGGCAGGTCCTTGGGGGCCTACTT
GGTCTATGCATCGAGCAACCAGAACTACAACGAGGTCATCTGGTTCTACCCCTCGACCAACAGCAACGAGGTCGACAGCTACGCCACGCTCAATGTCGTCGACGGCGTCT
AAGGTCATCAAATGTGAGTTCACCAAATAGTTCAGCCCAGATTGTGCGCTGGTCGCCCATGTTGGCAATGGTGATTGCAATATCCCATGCAAAACCGTAGATGGTGTTTG
CAGGTTGTTCTCAACGCAATCCGTGACGCTGGCGAATGCGGCATCACCCAGGACGAGCTGCTGCAGAAACTCCCGCACCTGTCCTAACTCGTCTGTGACCGCACGACCCG
TGTTGGGCGTGGGGCGTGAAGATACGAACGACGATGTTGCGTATTTGGTCGGCCCGGCCACAGGGGGCAGGCCGGCCCCCAGGCATTCTTTGTTTTTTTCTGTCTGGCCG
GAACTAGACCAACGAGATGAACGAAACAAACCAGATAAACCCAACTAGGATCACTGCTTACTGCACGCCACTTTCCACAGAGCTTGATTGATGGTACGTGATACTACCGG
CGTTACTGTATCTCCGCCTGCTGCTCTTTCAATAGCATAATCAAACTGGTAAGAGTATGCGCTAGACGTTGCGCTGATGCGTACAATCTGTCGCTCACCTTCAGCCATAC
GGTGTTATAGATCGAGAGCATGACAGACTGAAGTAATCGGGAAAATACGGATAAAATGTGTCTTTGAATATAGCACGAGTCTAGGCAAACCCGCGGGCAAACCCATCGTG
GGCGCTCCGGCTGATTTTTGCGTTAGCACACGCTTACCGGCAAATCAGCGCCGGACGTGCCCACTCCCTCGAAAATCTCATCCAATCTAAATTACGATTCCCGGAATCAT
CAAATTGCAACAATTACAAATACTGAAATTTTATACATTTTTGATTTAATTTTTTAAATAATACTAAGAATTAGTCAAAACGTCTTGAATACAACTGATGGTGATCATGC
GGTACAGCGTTTAACATCTCGCTTAATGACTGACCTGACTTCATGCTTTTTCATTATTGTAGCCATAACTTTTTTATTTTAGTCTTAGTTTCTTAACCGACCATCCTACC
CATTAGGTACCGCTTCCAACAATTGCTCTCGGGTCCAATTTTTACTGACATTGCGTTCTTCAAATTCAATACCTTTTGATTCTAATAATGCTTTTGCCTGAACACAAAAT
TGATGTCAGGTTCGCATGAAGAGTCGTCACTATAGGCCATCATGAGCCATTTGCTTTCAGAATCTTTTCTTTCCCAGCCCGCTATAAAAACAAAATTTCCGGATACGGAT
GGTGTACTTGCGCTTGGTCCCGAGCGCGTTTACGGGAGCCGCATCTTCGGGGGCATCTGGATTGTAGCGTGTCCAGCCGCTTTGTTCATCGTATTCGGCCTCAGCGTCGG
CCTTCCTTTCGCGTCTGTTAGCGGATTTCCTCGTCCAGACCGTACAAGCATCGGAAGCAGAGCTTAAAGTTGTCCAGCCTCCGGAACCGATGACATTTCTCGCACTCGGT
ATCGTTATCAATAAATAAACCAAACTGGCTTAGATTAAAGTTAAGATTTTGAAGTTGATAATGACCACGAATTCGATAAATTTCTTCTTCATATTTGCGATCTCGATTTT
CCGATCCATGCGGTGTATTCGAGTGACCTGTCGCGCGCCTGGGACACCGCCCAGGAAATCGCGCGGGCCGCTGGCTTGCAGGCGGTGGCCCATGGCGGCCTGCGCGAGCG
GTCGTCATGATGGTGGTGCCCACCTTGGGCACCATAGGCACCGGATTCAGGCTGGAAGGGGGCTTCATTTTCCGTCACCGAGCAACCGAGGCCGCGCACCATCTCGGCCA
TAATCGACGAAAAATATATCATCTTCATAATCATCCAAATCAATATTTTCAAATAAATTGTACGAAAAATGAATATACCTAGTCCAGTTTCAGCTGCAATGAATATGTTG
GCATGAACCGTCTTGATCTGCCCCTCCACCGCCCCCTTGATTGAAAGGTTGTTCCAGCTGAGCGTTGCGAGCGTCGACAGGATCGTTATGATCGCTATGACGATGATCAG
GGGGGACGCGCCGGAGGAAGCCCACCGAAACGACTGTTCGAGCTACGTCATCCTCGCCTACTACTGGGCGCGGAGGGTTACCGGAATCGCCGTCCCCGATCCATCGGGCT
CCGCGATGGCACAACGTGCATGTCGACTGGCACTGGACATCCTGAGGACAGACGCGCGCTGTGATACGATGAAGAGGATTGTCTTCATTCAAAATTTGAAAGGCCAGACG
GATGGGATTGTTCATATCAAACGGAGCGAAGTAGACGACATCATTCACTCGGTGCTCAGGGACATACTCAAGAAGCATTTCAGCCGCCGATCCGTGTGGGTCGATGAACG
GGATGCGTCTTGCAGTCGTGTTCCGCACTCGCGCTGTTGTAGAGCGGATGCTCACTAAGGGTGAGTCATTCCTTGGCCTGCCGGTCGTGGATGGTGATGACTCGGACATT
ATGAAAAAGCACGGAAAGGCGAAAACACCAATGGTTTGTTTTGGATATCCGGATCGAATAAGTTAAAAATCAAGACCAAAGCCAAAGAAACCTTGGCGGGAAGAGTGGCC
CATCATCACGCAGGCTTACTTTTAGAGTTTCCATTGGAACTTCTAGGTATTGGCTAATAAGGTTAGCTGGAACCAATCCACCGCGAGTGAGTCCTACCACATAGTCGGGC
CATCATCACGCAGGCTTACTTTTAGAGTTTCCATTGGAACTTCTAGGTATTGGCTAATAAGGTTAGCTGGAACCAATCCACCGCGAGTGAGTCCTACCACATAGTCGGGC
CAGTACCTTCGTCTTGAACCGCGCCATGAGCCTGCAAGGCGGTCACTGGGTCTGGACAGCAAGTCTGCGCTTCGGCTTCATGCTGATTTTTCTGGTCGTACTTTTGCTGG
AAGCTTGAGGCCGGATGCTATCAGCTCCGAGTCTCCGCCGGTGACAACAACTTTCGGCCGGTGGGTGGGGAAGGCCTCGCGGCGGACCTGCCGGATGATTTCCGCGACGA
CCCAGCGCAACAGGTTGAGCGTCAGGGAGTCGATCTGGTTGATGACCAGTCGACCTACCACGGCATTGCCCGCCCACATCAGGGGCGGCAGTGTCAGCAGGAGCAGTAGG
GGAGGACCGGCCAGCGGAAATGGTGAATGAATTCTGCGAATTGGCGGAACATATTTTTATTCTAGCATAATATAACGGGACTCGGGACTAGTTCCTCGGGACTCGTTTTT
AGTTAAATTGAAATGGAGCATTGAAAGATGGAGGTGTTGAGTAACGTACAATTTATTAAGGTCGTTTGAATTTTGTTTGGAAGGTAATTCCTTAAATCTTGTCAATTTTT
AAAGTATTATTGTCATTTGGTTTCAGATCCAAATTTCTTGAGCAGACACCGAAATCTCCATTATTATAATAGATAGTACAAGACGATCCATCCAATTTCTCCGAAATTTC
GTTTCTCACCTTTCGACCAAAACCTGTTGCCAGTTCAGCAGTGTGGGCAGTCTGAATGATCTTCTTCTCAGGAAATTTCCCCAAAAACCAAGCCGGAAACAAATAGGAGG
GAAGGCTGGTGGTATGCTTCAGGACGATGCCGCCGCACAGTTCGCTGGCGGTGGTGGCGGTTCCTGCGAGCGCCTTGCCAGCCAGATGGGTGGCAAACTCGCCGTGGTCG
TACGTTTACGGGCACAGTAACCCTGCCAAACACCACCTCTGTTGGAGATGTCAGCAGTACGGAACTAAGCTATGTAAATGGGGTTACCTCTGCTATTCAGACACAGCTGG
TACTGCTGCTGGTAAACTAGCAGCTGCTGGAGGATCAGATGTAGTGACATTTACGTCCTTAGATGGAGCAAAAACAAATCCAAAAGTATATGCAGTTCCAGTAATGACGA
GAATTAATTGCTAAACTTGACCTGATCGTCGTTGAAGTCGTTCCATCTATTTTTTTAATTCGGTCAGGCGTGCCAGGTTTATGATCTATTTTTGTTTCGTCAAGATCCTT
GGTGACCCGTGGTGTTGATGGTTCCACGGGTGTCGCACACAGTTCTGGTGCGGTCGTTCAGCACGGGGTGTCAGCCCGTGACTTCAGTGAAAAAAATCAGGTCTATTTGC
GAATCCTGTCCCAAAGAGGGGCCTACGGTCACATTCTGAATGATCTTGACCGGAGCGGGCAACGCCCCTGCCCGCAGTACAATGGCAAGGTCCGCAGCGGTTTTTTCAGT
GGGGCTTGTACAAACCCGCGACAAGGAAAAAAGCGGCGAGCACGTATTCACGCGTCGGGTCGTAAAAAAACTGGACCATTTCCATGAAAGTTTGAACCTTCTATTTGGTT
TGCTGTTGCCGGTAATCCGCAGCGCAAACGTGTGCCGACCATAGCTGTTATTGGCCATGATGTATTCGTCAGCACCCCCACGCGGGAAGCTGTCCACGATATCCCGCCAC
CCAATCGAATTATTGTATCTCCACAGATGCATCACCATCCGCCTGCATGCTGGAGACAGACGCATCACCATCCGCCTGCATGCTGGAGACAGACGCATCACCATCCGCCT
CTTTTGTTGGCGAGACTACTAGTGAAATTCCAGCTACAACTATAACCGTTACCTCTGCCTGGACCAGATTCACGTTTACTTTTACATTGGTTGCACAACAAACAGCCAGT
GGAGCCGGGGCTCCTGCTGCTGGTGGAGAACCTGCTGCTGGAGCTGCTCCTTCTTTCTTTAATTTTTCTGCTTTCTTCTTAGCTTCTGCATTTGCTTTTATGTCATCTGC
TACACTAGAAAGCTACAAGACCCGCATATACCTCAAAACGGATAAAGAGCTTTCTATGTTTCACTTACGGTGGAGTTAGCCTACATCTTTAAATCAACAGTTATTACCTT
TGAAGATGCACAAGAGGAAGAAGAAGGAGAATTCTTCGACGAAGAGTAAGAATTTCTTGACAAAGGGGGAAGATAGTGTATTATGTGTGTGTTCAAACTATCTTCCCCCT
GCGACCACACCCTGCTGGCACAGACCGCCACCTGGGAAGAGATCAAGGCGATTTGCGACGACGGCATGAAGTACAAGACGGCATCCGTCTGCATCCCCGCTTCCTTTGTC
CAGACCAAGCGTTGACCCAAACTGCTGAGCTTGTTGAGCTTGATTAAATGCCGTGTTGTAACCTTGAGCAATCAGTTAGTTGCTTGGCTAGATCATAGTTCTGTTGCGTC
TCATATTCTGGAAACTCCGATGCAACATCAGCCATTATTGGCAACATATGTTTGATTTCCTGCCTGCGACTACCAGCCATCAAGGCAATTATAGGTTTTCCCGCTCGATA
CCTCGGTTTTCCACATTGTAAGCGAATGAACATCACGTCACAGAAACTGCAAGGTTTCAGGTCTTGAAATAGCATGAGTGTCATGCTATCATATCGGCATGATCCAGTCC
CTCCAGAGGACTACGCAACGATTACCAAGGAGCTCGACAATGAGTGAAGAAGAAGTAGTAATCCCGCCAGAGGCTTACGAAGGCGAAGCTAAGGAACGTGACCTCGGTCC
GATGGACATCCAGATGCCGGTAATGGACGGCCTGGACGCCACCCGGGCCATCCGCGCCGATGCGCGCCTCGCCGACCTGCCGGTGATCGCCTTCACCGCCGGGGTGCTTG
CAGCGGCCGTCCGGGCCAATGTAAATGGCGACATGATCGACATCGCCGGGAACCAGCCGCCCGACCAGACGCCAGAATTCGCCTGGCAGGATGTCGGGTTTGCCGTTCAT
AACACAAGAATACCAAAAGAAAGATCAATATGATTCACAAACTCAATTCAAGTCTTATCGACAAACAAAGACACTATGAAGCACTTCATCAGACACAAGTCATCATAGTG
GCGTTGCCCGATATAGTTTTTCTCGACAATAATATGCCACGTAAAAACGGCCTGGAATGTTTGTGTGAAATGAAACATCACGTGCGCCTGAAAGATCTGCCCGTGGTTAT
ATTTGCAGATGATTATTCTTCGGATGTTAACGGAATTTCATCTCTGGATACTTTTACCAACGCCAATAATGACATTGCTTCAGCAAGTTTTAATGTTGATTCCAAATCAG
CGCAAGCGGACAATCGAGACGGCCGCAGTGGTGCAGCAGCGCGTCGGCGTTGCGCCGACGGTCATCACGCTCGACGCCCAGCATGTGAAGAGTGCGGCGGCGGCCGTGAT
GATATGTATTTATAATTCTTTCTTTAATCTCGACCGGAATATAAGTCAGGTCAATGAGCGCAGCATTCCTGGTAAAATTGGCTTTGTCAGTATCATTCCATGAAGAAGTA
GACCAATGACAAAGCCTTTCTTGTCTTCCGTCCATCCCATTTGCATACGCATAATATCCGCCTCTTGTTTGTTCTCTATAAATTGACCCCACTTAACTACATACTCTTGC
AAGAACTTGGCATCGATAAGCATATTGATAATAATGCGGATGTAATTGCGGAGCTTGGATCAATAGGTTATAAATTTAATTACCAAGCATTTGCAATACAAAGCGAAGAT
AAAACAACCACAATCTTTTAACTCAGAAACAACATCCGTTATAAATTGACCATGATGATTCATATTTAATTGTTCCAAGACACGCTCCTTGCCTACGCGCATCTGGAAGT
TACCCAAACAACTTCATCTTCAAATACGCGCCCCGCTCGCTGCATCCCAGCAGACGCCGGAAATTCAACAGGTGCGGTAAGCACTTTTATTCCGTCATCTGTATTGACTG
GCTTTTATTTCATTCACAACAGGGTCATATTTATGGTCAGCATCAATAAAAATAAAATCAATGCTTTCATCTTCGTATAATTTAGACGCTTCAACAGAATCCATATTAAG
CACCGCAATCACGGTCCCGGCATGGAGCAGCATCTTCAGCGTCTGCGCATCCACCGCCGTTAGCGTCCCATCCAGAAACACCAGATCTGCCGTCACGCCCATCTTGATCA
TCAGAATAGAGGGAAATTGGTTTATCAATTTCAACTTTAATACCTTTATTAAGATTTATTACATTATTATCATTATTAATATTATTATCATTATTGTTTGTGTCTGTCAG
GCCGCCACCTCTGTTGAAGCCGCCGCCACCGCCGCCGCCTCTGTTGAAGCCGCCGCCACCGCCTCTGTTAAATCCACCGCTACCACCTTCTCTTGGTTTTCTTTCTTCAG
GAGTTCTTCAGCCGCGGCGTGACCCGCCTTGACATGATTTCCCAGCTGCCTGGCCTGGCATATGGTCTCCACACGCTCGAAGCCGACCGGGAAGGGAAGCAGATACCGGC
AATTCCCGTCGTTGATTGGCGGGTCAGTCAACCTCTGTTCCCATTGGTGCGAAATGCACTTACCCGCTCACGCGGGCAGCGGGAAAAGTAAGGAGCAAATAACGATATAT
ACGGCTCACAAACTTACGACCTCATCTGAAATCTTTTACAAGATCGACCAAATCATCCAAAGCACGCCGGAGTTGCTAGATCGCTTTGCCAAGAAATACGAATCAAAAGG
CCATGCCAAGGCTGTCTATAAGGGTAGTCAATTCGTCCAAAGATTGAGGTTCTCGTTCCAGTTTGGGCACCTGTAAAATTTCCGACAATGTCGCCGACATTCCCTGATAT
GCGTCCGCCGCCGACTCGGCCGTCACGTGGCGAGGAAGGCATCTTTCGCGCGGCGATCACTCGGCCGGCGGACACCTGAGGTCCTGAGTGTCCACACCCCCCCTTCCCTT
TGAGCGGATTGCTTTACTTCTTGACCAATATTTTTAGCAACCTCACCAGTAAACTCTACATTTTCTTTAAACTCAAGAACTTCAGCCATGGCTGGTTGCAAGACTTTTAT
CGGTAGAAAGGTCAAACTGCGTTATGCTCCACCGCGCAGCGCTGATCCGAATGACCAGACGTATGTTCGACGCGTAATTTCGGTAGAGTTAGCTCGTCCTGTCAAAACTC
AAATCGCGGCCAAAGAGGAAAGCTCTTCGAGGAGGCGACTCTTGATTTCGACGGAAGTTAGCCGTTCGCAGCGACCCTCGACGCCGTTACGCTGGTAGCGGTAGCCGACG
GCAAAGAGGCAATTTACTGCTTAACTCTAAATTAGATGGCACAGACTTAGCAACACAAAGTGTTACAGTGACAGCAGTAGCTCACACATTGTCATTTTACGGTTACAGGG
CTAGTTAAGACAGTTTTGAAAAAGGCAGGAAGATAAGATTTGTTAGAAATGTGAAGCATTTAAGAATAATTTGAGTTGATAGAACAGTTATAAGTGAGTCTAGTTAAGAC
GCTAGTGCTCGCTCGTAGTGTTCTTTTTTAAAGTAACTTGAGCTTTCTATATCGGTAGTAACAACCTTTGGAGAAACTATAGGTTCTACTTTTTCTTTTTCAACTTGCCC
CGCCACTTCCTTAATCTTGTCTATCTCGTTGGGCGCTTCTACGTCCATAATGATTTGACGTGTCTCCATGATTGCTACACGGTGTGAGTAAGTCTTTGTATCCATTTTAT
ATATGCCAAATTTTGAAAAGAAAATTGTAGATGAGGAAGAACGATGGGCGATCATCAACTACCTTGATTCTCTCTGATTCTATTCTAATTTATCTTAAAAAAGAGCAATT
AGTGTAAACGTAATCATGCCCACCTCAATGCAAAACAGTTGCCATTTTTTCGTCATCTATAGTTACTTCCCAACCCCTCTTACCGTATGGATGCGGGCTTTCCATTAGCC
GATGCAGTAGTACCCTAGTTCTCCTAATACAGACCGCAAAATTTGTTGTTGTCATTTGCCGCTCTCGCATCGCACATTTTAGGGATGACGATGGCAGGGGAGTTGTGCGG
GATTTACAACGCTATCGGTTTTCTAAATGATAAGTTTTATATTGTAGACAACGACGAAAATTCTTTTAGTTTTGATGACATTATAAACGAAGTCAAGCTTTTAGAAAGTG
CGGCTGCTTTTTGCCATGCGGCTTGCCAGTTTTCACGCCTAGTTTCAGCACGTTTGCCAATCTGTGCGGCCTCATCAGTGGCCTTCATCACGTTTTCAAAAACTGCTTTT
CTCAAAAACATTTCAGTGGGAGTGAAGTCATTCGGAAGGGGAAGGCAGGTTGCCAACATTTCTTTGTCGATGATGCAGTAATAATCAGGCGTGAACGGAAAGCGGTAAAT
TTGTAGATGTCATTATTTACTTGTATTGTCACCCCGATGTTTGCTATAAGCGTCAAAACGTATATACACTTGGAGCACTTATATGATCTACACGTAAAATATGAGACGGA
TCATCGTCAAAGACGAAGTCGACGCCGGCGGCGGCCGTCTCGTTGTAGTAGAGGGAATAGGTGATCGGCGCACCGAGCAAATCGACGGTGTCATATACGAGCCGGTACTG
GGTGGAACAATGGAAGATGCTGATGCTCCTCTCAAAGATAAGCTCATGATGGCTGCTATGGGTTCTCTGGGTGGGCGTGTGTTGTATCGCATGAAGTCACCCAAGGAAAT
CGTGAGTCCACCACACATCCAACCAGTGGAGTTTCCGATGCGCACGCTGTTGTTTTTTTCGTTCGTAACCGTCGCCCTCTCCTCCGCATCCCCGGCCAGCGCCGCTCTGT
AGACGACGGCCTCGGTGCAACCGCCGTCGGGCGAAAACCAGACTTCGATGGATGAGCGACGGAAGGGGCCGTGATCCGAGGCGAATGAACTGACCGCCAGGATGACTGCC
CTCCTTTCCCTTTTCACTCTTCCCCATGTCTTCCCCATCTCAATCAGAGCGCAATTTCAATTCCACCGCCGCCGGTCAAACAATTTTGTTAGAGCAATGGGTAGGTTAGG
GACGCCAATGGGCCAGATGCCAATGTCACAACAAATGCCTAATATGTCAGGAGGCTCATCTGAAGAGATGATAGAAGCAATTATTGATGAAAAATGGAATGAGCCAGTTC
GAAGTGACGTGACGGAGCAATAAGAACATAGCCATTGTGCTTAATATCAATACCCTTGATACCAGCGGCCTTTAAGTTTCCAATAAGTTCTTCTGACTCATTGCAACGAT
AAGAACAAGTCAGTCGTCTCGTACTTTGTACACTCGTCAATCAAGTTCACGCGATAAGTCTCGCTCAATGTTGTAGCGCCATTCTTGAGAACGATGTCGTAGTATGTCGC
TCTCTTTCAACCCGCCGAGCTTCAACGACAGCGACGGAATCATGATGTGTTCCATGCCGCTGGTGTTTGAGCCGGACCAGCTCAGGTGACGACGGAAATCGTTCGTCACC
TTGGTGACAGTTCTTTTGAGTTTACCATCAGGTAAATTGAGTGGTTTATCATCATTAGCTTGAATAAATTGTAGGATTGATTCTTCCTTAGATTTTTTTCCTGAGACACG
AAAACAGGAGCTTATGATTATTATCCGCCATTATTAACCAATGCCAATGGCGGATATTCCAGTAGTCTAAGCTCCTGATTCCTCAAGCAATTCCCGATTAAATGTTTTTT
CACTCGATGAGCCTACATACGACAGCAACGATATCGGCTTAGTGTCTGTAACAACTGAATGGCAGTCAGCGGGCACCATTGGCTCTATCCGAATTGACCTCTCCACTGCG
GAGGGTTACATCACACTGACAACCCACAATTACCAGTCACAGCAGATCAATACCTCCAGGCTTGATTTGCTCCAAGTGCTGTTTTCGGTTTAGTGCAGAAACCACAGGTG
TGAGCGGATTGCTTTACTTCTTGACCAATATTTTTAGCAACCTCACCAGTAAACTCTACATTTTCTTTAAACTCAAGAACTTCAGCCATGGCTGGTTGCAAGACTTTTAT
GTCAGCGCGGGAAACGAGAATGTCGCCGGCGGAAGTGCGGCACGCGGCAAGCCCGCGGAGCCCCCCGTGTACCGCGATGGCGAACCGAATCTGACGCCGGCCGTTGCAAT
GATCGGCAAACCATCGGCGCCGGTATACGCGGCGGCCTGGCGGTGGCAGACTTTGGGTCGAATCTGTTCAGCCGCATTCAAGCCAGCGCCGTGTCGATGGCGCAAACGGT
GGCGCACAGCGGCGCGGTCTCACCGGTGCCGGCGGTGGAGGTTGCACCGATGCGGACTTCCACCTCACACTGCGCCGACGACAGTAGACCGGAACGCTGGAGCCGGACGT
TGGCAGTCAGTATCAATTTCACAAGGAGCAGTATTAGATACACTGGTAATATCCGTCCTCCAGAATACACTCTTCTTTTCTGCACACTGCTCATCGTCTGAGCATTGTTC
TGTTGTTGGAAGTAGCAGTGTTGAGCTATGTTACAAGCTCATGTTATTAAAGTTAATAAAAGAATGATGAAAAGTGGTTAAGTACTCAGTTTTGCCCTTTTTTGTTGTAC
GGTATTGAAGGGCACGACCGCTACCGCCGCGTTGCTGAGCGCCGCACGGTCGCGTTGCCGTCGGGCGCCTTCGCGCAAGCCGCAGGACCGGAGACCAACAAGGTCACGCT
TTTTTTCATAGTGTCAGCTTTGCTAGGTTGAGCTGGTTTACCTTTAGATGCTGGACTTACGTTCTTCTTAGCTACTGGTTCAGACTGCTTTAATGTAGAAGCCTTAAAAT
GAATCCAGATAATCCGCCCGGCGGGTTGTTACCACCGTCTAGATTACCGGGGTTGGTTTACTTGCAGTCTAAAAAGAACTTACGCGTATTGTTATTTAAGTTTACAAAAT
AGTAGATTTTATAAAAATTAGTTTTACATATTTTCTGATTTATAACGAGTGAATAATAGTAGCTCGTTTTTTTTACTTTTATTTTTTTATTTATCAAATTAATTTTGTTA
ACCTACACCACTGTCATTATGTTGTAAACGATTCCTTCAACTTCAAAGAATAACAATTTATGTAAATAAATAGCGAATTTGTCGAATAGAAACCCCTACAATTTGAATAC
GATTATACTATTTTAGAAATACCTCTTAAGGTAGCATAATTATTTAAAAGTGGAAATAAAGAAAATTAACAATTAGCTAATACTTTAATGATTGATTTCAATAAGAAAAT
CCTGCTCAAGCGGATCAAGTGATGGACACCTCGACGCTCATCCTGGCGGTGGTGCTGGCCGTGGCCATCATCGGGCAGGCGGGCCTGTTCGCGCTAGCTGCGTTCAAGCG
ACCCACGATCAGCGAAGCGTCAGCAGGAACCGAGACAGTCGAAGCAATCGGGAAAGCCGTGCCGCCCGAAGGAGCCGAACCCTGCGCTACCCCGCCATTAGTGTACACCG
TTTAATGATTATGCTTACATACCCGCCATGAGATCACAAAGATCACTCATTTCGGTATACATGGTGATAACCTTAATAAGATTTTCAATGAAGTCACTATACGCATCGAG
GAATATAAAGATAATTGAGAGGAGCTTAGTGTTTGATTTAATAAACTTTGAATAAATAGAAATACATATTTTGAAGAGACATGGAAGAATCTAAATCCAGAAAAATATTT
CTATCGTCAACCGCTCAGGCAATGATTGCTATGTAGAGCTAGAAAGTTGGCCGGGCCCAAGAGGAACTATACATGGTTCTGGTAGAAATGCTAGTGCTTATTCGTGGGGC
GACACCCGAATAATCTACGCAATCTAAACCAGTACAAGTACCTTCTTTGATTGCCGCATCTAATTCCTCGAGGGTTTCATCACCAAGTTTAACTACACGTTTGTAATGAT
CATCATCACGCAGGCTTACTTTTAGAGTTTCCATTGGAACTTCTAGGTATTGGCTAATAAGGTTAGCTGGAACCAATCCACCGCGAGTGAGTCCTACCACATAGTCGGGC
CGCCACTTCCTTAATCTTGTCTATCTCGTTGGGCGCTTCTACGTCCATAATGATTTGACGTGTCTCCATGATTGCTACACGGTGTGAGTAAGTCTTTGTATCCATTTTAT
TGAAGAAAATTTGTGGTTGAAATACCCGCAATGCGATGGGAAACAAATTAAGGGAGAGAGAAATGAATAACGAAAAGATTCTGGAGATAGCTGATAAGTACGATACTGGT
CGTCGGTACCCACCTTCATGGACGTACGATCCTGACGGATAAGGAATTGCTTAAACTGAAACCAATCGTTTGACATATCAGAATTTATCAAAAATTCCCAGTCCGAAAAG
GCGAAGGGTCCGCTGGTCTTGCATGTGCTCTATTCCGAGCGGAGCTATCACGAAAGCTTGCGTCAGGCGATGGTGCCGCCGCTGGTCGTGGGAGGAATCGCTCTGGCCGT
GCGTCTTGTCTGAGGCCGGGGGTTCGGCTGTCTGGCTGCTGCGCTGCCGTGGCGCGGGGGTCGGATTTGTCTGCGGCGGATTGGAAGTCGCCGCCAACATCCAAGCGGCC
GACGCCAGGTAATCCTCTTATACCAGATCCGGGAATGGGACACTGCGGAAAATAGCTGGTGGTGCCAAGAACGGCAGTGGGGTTTTGACTTATAACCTGCTACATCAAAA
AGGCCGGGTGCGAGCAGCTCGGCGATCTCGGTGGAGCACTCGTGCGGGGTCATCGGGTCGTCGCGCCCGCCGATCACGAGGGTGGGCACGGCGATCTGCCGCACGTCGTCG
GGCCTTGCCCAGTTCCACCCCCCACTGGTCGAACGGGTTGATGCCCCAGATCGCCCCCTGGGTGAAGACGCTGTGCTCGTACAGCGCCACCAGCGCCCCGAGCGCCGCCGG
GATTCTGTGATTGCTGAGATGGCAGGCACAGGATTAGATATCAAGAAGTTGTGGCACTCTGTGAGAGGGACTACCACCCGACAGACCCACAAAGACATCCACGGGGTGCCT
CTACAAGGCCGGCGGCGAGCTCGATCTCGCGGAAGCGCAGAAGGAAACGTCGCGCTGGCTGCAGAGCCTGCTCGAGATCCAGTCCGATACCAAGGACAGCAAGGAATTCCT
GGTACTTTTGGACGCAAAATGATGGAGATATAATTTTTTTATTGAATTACACAACAAAAAATGTGTGTGGTGTAAATCAAAAAATCTAATTGCTCTTTCTCTTCTTGCGAG
GTGGTCAACTAGCTACTAACCCTGAAATGGCTGCTTACTACAATGCAATTGCACAGCAGGATCTTGGTCTTGCTAATCAGTCAGAACAACAAGCTCTAGCTAACCTAACAC
AGTTGATTGTATTGATAAAGAATTTTTTATGAAAATGTCAATACTAAATAAAGAGAATAGATTAAAGCAAACAGATGATTTTTGTCTAATAACTATGGTTCGCTACTATTT
TAAGTTCGAGTTCGGTGTGTACGCCGACGGTTTGCTGCAGATGTACTTCACCCCGGCCTTCGGCCTGTTGAAGAACATCGCTGTCTGAGCACCCCGAGTTTTCCTTGGAGT
TGGTATATTTGGTTGTTCAGGAACAGTAATTGGAACACAATCTTTTGTTGGATCAGGTCAAACTAACACTAATATGATATTATCAGGGTGTGTAACAAGACCAATAACGTC
[truncated: 7,998 more rows]

## Sheet: sequence length 151-200
CCTTGGAGTAGAAAGGAGGGAGACCACAGAGCATCTCGTAGATGATGGCACCAAAAGACCACCAATCTGAGGCCTTGCCATGGCCTTGTCTCATCAGTATTTCTGGCGACAAGTACTCAGCGGTACCACATAGTGATTTTGCATCAGAGTG
TGGAAAATAAAGTTGATCAGTCAATGGGATCTTTATCCGGCGGGCAGCGCCAGGCGTTGACATTGCTGATGGCCATAATGCCTGGACAAATGGAGAATTCATCAGGAGATGAAACAAGTATTCTTTTGATGGATGAACCAACAGCAGCATT
AAAGTAGATGGGCGACTGGAAGCGTGTGATTTCTTCGATCCTAAAGTTTGGATGCGAGGCATTGCTGATTTGGTTATTGTCAATGGTGATGGTGGTTATGTCATCGACTACAAAACGGGACGCTCTTCTAGATATGCTGACCCTCGCCAGC
TGACGGCTCGACCAAGGTGCTTGGCCGTGGCATGGACTTTGACAAACAAGTGGCCAGCCTTGTGACCACCATGAGCAAGAACGACTACCAGTTCAGCAAATTGTCAGAGGAAGACAAACGCAGCAAAGCAATTGAGCGTTTGACAGGTGGC
GGGCCAGCATCAAACCGGCAATAAGAGCAGTCTTTCCGTTTTTTCGTGCAATCGACAGATAAGATCGTCGAGTTCCGTGCGCGTTGTCGTACACGTCTCGAATGAATTTCTTTTGGAAATCTGCCAGGACGATCGGACGCCCTACATGAGA
TGTACCACAACTTGAAGAAAGTCATAGTCAAGAAGTACGGGATGGACGCCACTAATGTGGGGGATGAGGGCGGCTTTGCGCCTAACATTCAGGAGAACGATGAGGGACTGAACCTGCTGATGGAGGCCATTGAGAAATCCGGCCATTTGGC
GCAAGTATTTCTGCCAGATACGTAAGGTCTTGGTTGGTTTGATATACCGCTGTTCCGTTGGCTAATGCACCGTTATTGTCAATCAACCGGGTGAGGTTCGCAAGGTGAGTTGAGTTCGAGTTCGCCAGTGTCATGTTGGTCATCATCCACA
TGTTTGAGGTCGGCCCACTCGGCTGAACCGAAAGTGGTCGGCTTCTTTCTGCGTTTGGCTTCTCTGTCGGCGGCCCGTTCTCTTAAAAGGTACAACCCAAGAGCCGCGCAAAAGCCAAAAACGACAACGTCACCGATAAACACATTTTGGG
TATGCGAGGTTGCAAATAATAGTTTCTAGTTTAGAGTCCTCATCCAAGAAACAATAAAAAAACCTCAATATATTTAGCCAATAGCTCCTCAAAATCTGATTCATCAATCTTTTGAACTTCGCTACTAATCAAAGGTTGCTTCATATCTTCA
GTGTATTACCTAGCTCTACAAGCAAAACCTATACATATATATATATATATATATATATTTGTATATATATCACGCACCTCAACAAGCAAAACATATAATGGATCCAATTTGCCTCCTGGCCTTCGTGCATCGAAATTAACAGATATGGTAC
GAGGTAACGCAAAAAAGGTACAGTTGCCGGGTCTGAAAGCAATGATGGATACCGAAGAATTAAAATTTTTGGAAAATCTTATTTGGCTCATAGAATTATTTTCTTTTTGCACAATGGTTTTTGTCCAGAAGTAATAGACCACATAAATGGC
CCGTTGATCCGCAACAGGTCGTGCTGCGACGGCGCTGCGACGAGGCCTCCCGCGTGCAGTACCGTGTCGCAGCCATCGAGCGCATGACGATAGGAGTCCGGCGCCTCGAGCGTGCCTTCGATCCGCACGATGCCGGGGCGGTCAAGGTGCT
TGGTCTCCAACCGTCGCACCACCTCCGACACCGTCGAGTTTGTGCAGGAGTCCAGCCACACCAATAACGCCGCAGTTGTCGCTGAGGCCACCAGTGCCGCAGCGCGTACCGCTGCCGCCAATACCTCCACCGGCGCGGTGACCTTCACCAA
TTTTAAAGCCAATTTAATTATTTTTGCAAAAATTAAATTTTAATTTTATTAATAATTTTATATTGAAAAGAAATATATAATTTTAAATTCGATAAAATGGGTTCAAAGAATTCATCCAGTGGAAAAAACAGAATAACGAAATTAAAATAAT
ACAAGTTGAAAGCTGTGGGTCAAACAACTCCGCCCTCCACTGTAAGAGAGGTCAGACAATTTTTAGGATTGTGTAATTTTTTTAGAGGCCATGTTAAAAACTTTGCCATGATATCGGCCCCTTTAACTGCCCTCACAAAAAAGGATAATCC
AGGTATTAATTAAGTTGTAGCGCAACTATATCGCAGCCGCTTTAGCGCCCGAAATCATCCTGCAAGCGCTCAATGTCATCCTCTCCGAAGTAGGTTCCCGTCTGAACCTCAACGAAGATGACATCTTCATCTCCAATGTTTGCCAGCCTGT
AACGCAATAAAATATTACGAGTAGAGGCCACGTTCAACGCCAATCTATATAAAGTCAATATCAACAATACGGTTGGAAATGTGGAAAAATCTAGCGGGCGTTTGGTATATACGGACATTAGCAATACCACCACCGAGATGCCAAGAGAAGA
GGCTTTAGCGGCATATTCATTGTGGCCGCTGACCTTGGTGATCGTCGGGTAGTTGGTTTTCAGGTGCGCGATCAAATCCCGCAGCGCCTTGTCCTGCTGCGGCGTAAAGTGTTCGAAGAACGCATCCGTTGATGCCGACCCGTGGCCGCCG
CCTGAATTTGAAGCCGCCCTGGTTCGTGGGCCGGCGCGCATGGTTTTCCCCAATTTGCTTCGGGCCGGCTCCAACCTTTTTTAGCGTCCGCGATCATACCTTACAAAGTCGCTTGGCCATATTTGTCCATAATGGTCGTTTTTGTCCAACA
CCTACCGGCTGCTGAAATGGTTTCTGACCGGCGCACAAAGGACGTCGCCCTGCCCCGGCAGATTGCGATGTATCTGGCGAAAGTCATGACACCGCAGAGCTACCCAAACATCGGACGCCGGTTCAGGCGGGACCATACGACCGTTCTCCAT
TTTCCTATTCCATCACCTCCGACAAGGTTAAAGGAAAGAAAAACCCACCACCGGGACCCCCATGGAGCAACAGGACCTGGTTGATTACTACGACTACTACGTCGACTTCGACATTCCCTGGAGTTTTTCCTTCAGTTATAATTTCCATTAT
TACGGATCGACTGCGACTAGCTTCTGCGTGGCGTTGTCATGAGACTTCCACACGGTAACTAATGCACATTCATTCGCATCCATAAACTCTTCGTCAGGACCAGTCGCTGGGAACGAGACATTTGGAAATAGTTGTTTATAATCGCCAATCT
CGTATGCGCGGTTGAGTGCATTCGTCGATTCTTGCTCACGCTGGAGATTCTGCATCTGCAACTGAGCCAGTTGGTTTTGCTGCTGCGCACCTTGAATCGCGGCCACACGACCGTACTGTGCCAACGGGTCTTGCAGTTCGATACCTTTGAC
AAGCACCACGCATAATATCCGACAAACCAGTGGTTTCATAGATGATTTGTTTACATGATTCACGAGCTTGATATAATTGTTGCAATGCTTGTGCCACATCACGCAACGGCATGAACTGAACTGCACCTTGCAAGCCACCTTTTTCAACAAA
TGCAATTCATTCTGAATTCATCTGCCAAGGTGTTGAATAAATTTAGTTTTTCAATTGAGTCTACATACATCTCAAATGCTCTCAATGGAGTGTTCCATATTGTTTGATTTTTGTATTCCATTTCCGTTCTCCGATATTGTTTGTGTTTCAA
TTGATTTTTCTTTGTTGTATTTTGTTTTTTCCTTACTAGCAATTGATTTTCCATCATTACCAGCTGCTACTACTGGGACAACACCAGCATTAACTAATGAACAAATTGCTGAATGTAAAGCATCATTATTTGTTTTTCCACAATTACTATC
ACCGCGCAAGAAGCCGCTGCCTCCATCGGAGTCTGCAAGGCGTTGATGGATTCCCTGGTTGCACTTGGAGGTGATCCGGCAAAAACCCATGTTTTCCGTAATGGCGTCAATCTGGATCTGTTTCATCCCAAGCCACGCGACATTGCCCGCC
AACCTGGTAAGGTTGGTAGATTTCTAAATGATTTTAAACAGCAACTCTTAATTAGGTTAAATATTTTTATGTTGCAATCCAAAAACTTAAAACTGCTGGATATCCAGTGGATGTAATTAAGCCACAAGGGGCAATCTATTTGTCGATTAGA
GATCCACTTGCGAGTGATAGGTGATGTCAGGGAAATCCGCTGCCCGAATCGTCAAGTGAGCGCCGTTGATCAACTGCGTACCCCCGCCCAGAGCAAGCTCCGAGTCGGGTGTGACGATGGCGACTCCCGCCGTGCCGTCCACCGTCACGGC
CATGTATGTCTGGAACATAATCACGTTTTTCAACCATTGGTGTTGCTCTCCACTACGCCAACAACCAAATACTGCGCCTTTTCCATCATCGAATACATGAACCCAACCTGACCTATCATTGCGCTTGCCGTTAGTAGAAAATCTTGTTACC
TCAATAAATGAAAATGTCATAAATGGTAATTTAGAGTTTCGTAATAAAAATGTAAATTCCAATTATAAACCTTTGTGTATACAGTAATACTTTGTTGTACAAATGCTCTACGACTTTTCTTTCATATTCTGCAGTCTATATTAATCTTTGC
TCTTGGTGAAATGTGGTTCGCGGGATATGATCGATCGATGGATGGCAAGCAATCGTCATTGAATCTCTTTGATCATGAAAAGATCGGGCGGGTGCTGATTGATAGCGAAGTTGTTCAGGGAAAAGCAGCTGCAGGAAACTATTCACTGCAA
GACGTTGCCGCTGACGTCGATACGCATCTTCTCAGTGTTGCCGGTCGTGCCGGTGGAGAAGAACATGGTATTCCGACTCGTACCAGACGCCCCGATACAGACTTGCAGCGCGGTCGTAGTTAATGAAACGGTTGTACCCGCCACCAGCATC
TACCTTAGCGTTGCCTACCAAAATCTTGTCGGCGTATTAATTAATGCCGTCAAAGAACTTTCCGAAAAAGTCGAAAGATTGGAGAGCAAATAATGACGCTTCCTGCTTCTGGTTATTTGCAGCTTGGGACAGATGGCGCTACCGGTCGCTC
GCTGGTTATTATATTTATAAAATTTGTAACTTTTTACCTTTCTATTAGAATACATAATATCATAATAATATTTAATGTATTTGTCAATATATTTTTTAATTCCTCTTTTGACGTATTATAACTCTTATCAAATTGGTCTAATATTTGCTTC
TACAGGACCCACAGGACCTCAGGGCGATCAAGGCATACAGGGCGTTACGGGACCTACGGGTCCTCAAGGTGTTCAAGGTCCTACAGGACCTACCGGATCTACAGGTCCGATAGGCCCTCCTGGTTCAGGTGGCGCTGTGGCTGACTTTGGT
TCTCTGTTGTGCTAGCTACAAACCTTGATAAAGACATGTGACTCTAATTTGAATTTATCAAAGTATAGAATATCAGTAAGGCTACTGCTCCCTCCCTCCCTCTCTATACATACATACATACATACAAATATACACATACATACATATACAC
AGCGCAGCATTGGTGGGAGACAATCGGACAGGCGGCGGTGTTCTCGAAGCAGTTCCAGTTTGGTCTGTGGAACAAGATCGTATCAAGCAGGTTCAAGTCTGACTATGTTGACCAGAGGGCTTTGCCGTATGATCCTACGAAGGTGAAAGAA
GAACCATTTTTCTTTTACCGAACGATACCTTTTGACTGCTGCTCGCAGATTTCGCTTTTGCCATTATTTAAGACCTTTTACTTTTGTATAAACTTCGACAACCTTTGTATGGATTTTTTCAAAAACCTTTTTAGTATTGTGTTTATACTCT
AACTGATACAACTCGTGATGTTATTACAGACTTTAATCATTCACAGAAAGACAAATTGATCTATCAAAAATCGAATGCAGATAACTTAACAGTAGGTAATAACGCATTTGTTTCATTAGCAAATATAGCACCGTCATCAAATGCAACTGGT
AAGACAATATTGAGGGTCCAGATCTAGAAGATCACATTGCACGTATGATGGCAACACAGGCAGGAAATGACATCGAAGATGTTCTTCTTAACGGTGACACAGCCCTCACATCAGACGCTCTTTACAAGGCATTTGATGGTGTAGTCGTAAA
GCCGTATCATGAATAATACATATGATGTTTACAAACAAACGCCAAAGTTAAACCAGTCCTTGATAATGTAATTGATAATAGCCTTAGCAAAATGAAGATTGCACCATTCTTTAAGGTAGTATTATATATTTCGCTTAACTATTAATCAAAA
GGTTTTAGGGTTAAAGCTACCGAGAATCATAGATTTTATGTTGCAGGTAAGGGGTGGATTCCACTAATGGATATTAAGGTTGGGGATAAGTTGGTTGTAAAGGAGCATGATATAGAAGGGCAGGACAGTATGAGTTTGGACTATGCTTTTC
AGCGCAGCATTGGTGGGAGACAATCGGACAGGCGGCGGTGTTCTCGAAGCAGTTCCAGTTTGGTCTGTGGAACAAGATCGTATCAAGCAGGTTCAAGTCTGACTATGTTGACCAGAGGGCTTTGCCGTATGATCCTACGAAGGTGAAAGAA
TGTACAAAATTAAGAAGCGTGGTTCGAATCACCTTCTATTGCTGGACGAAAGTGGTAATCTTGTTAGCAGGTGGTTACAAGATGTCGCACAAACTGAAAAGAATTTACGCTCTTAGAAGGACTAACAGAAATGAAGTTTACATATGCAGAT
TACCTTAGCGTTGCCTACCAAAATCTTGTCGGCGTATTAATTAATGCCGTCAAAGAACTTTCCGAAAAAGTCGAAAGATTGGAGAGCAAATAATGACGCTTCCTGCTTCTGGTTATTTGCAGCTTGGGACAGATGGCGCTACCGGTCGCTC
GTTTTGACCAGCGCGACACATTTTTCTTCAAGCATTCCAGGTACGAGCCAATCAAACGGCGTTTGCGTGATTTGATTCAATTGATGCACAGGAATGATTGCCGTCACACCGTCTTCATCGTGTCCAGGTTCAAAACGGTATTGCAACGCAA
ACTGAGAAAGAACCCGCACTCCGGAGACGCTCAGAAAATCACCGCGCCGAAGTGACTTGGTAAATCATGTTCGGCACCTAATTTGTATCAGAAAACTGGGAATTGATAGGTGGAACCCTGAAAATTTAGGTACATGGAAATGTAAAGCCCC
TTTGGAAACTCGAGCCCTTGATTTACAAGAAACCCAGGCACTTATTACTTCAAGCCCCCTTGGCCCCCTAGGGCCCAGGTTACTAACAACGAAGCTTTACTTCGTGCTCTTTTTTCGAGGCACGCACTTAACCTAAATTTTTTTTTTNTTT
GGCCAGTGAACTCATGAACCTCGGGTCCTTGAGTGACAAATTATTGTCTTGGTGCAACGCGTTGGTGGGTCGTTTCAGAGGCGGCATGGGCCACGTTAACGTTGTGTCGTCTCTCATTTTTTCAGGCATGTCAGGGTCGGCCGTTGCTGAT
GGGCACTGAATCTGGCTACGTCTGTCCAGCCATACTTTGGCCTAGCAACTGTTTGGGTAGCTGCCACGAAAGCCTGTGCCTCAGGACGGTCTAGCCCAGGCCTTGCTCCCTCGGCCAAATCCATAACGGTGAAAGTCATGTCAGCGATTCC
AAGCAATAATCAACAAAGCAATTAAAGCACTCGAAAAAGAAAGAAAAGAGTTGCCACAAGTCAATTTCTTTGGTGATGATAACTGGAAGCAGATTGATGCTAAGTTGTCAATCCTAAAAGGTGAGAAGCAATATTCTTATTTTGAGGACGC
TTGCGTGTCTCAGAAGTTCGCTTACTTTCAGGTCCACTTTTCCAGCATTGGAAAACGGATAGATGACAAATGAGGCCGGTTCGAATTCCCCTTTCGCGGCGACAATCCTGACAGGTACCGCCAATGCGCCGTCATCGGGATACGTGTACAT
GGCCTTGGCCAGCTGCGAGTCGTCGGTGGGCGGGGTATCATCGGTCCGCTCGACGCGGATGGTCATGTAGTCCTTGCCGTCGGGGCGGTGGTCCAGTAGCACCTGGAATTCGCTCCCCAGGCCGGCGATGGTGGCGAGCAGTTCATCAATC
AATACACTGGTAGGAAACATTCGTGGGCCGACAGGCCCAACTGGAGCAGCAGGACTCGACTCCACCGTCCCCGGGCCGCAGGGTCCGGCTGGTGCGGATGGCGCACCAGGCACGCCAGGCGCACAAGGCGCAACAGGCGCACAAGGCGCAC
GAGGTAACGCAAAAAAGGTACAGTTGCCGGGTCTGAAAGCAATGATGGATACCGAAGAATTAAAATTTTTGGAAAATCTTATTTGGCTCATAGAATTATTTTCTTTTTGCACAATGGTTTTTGTCCAGAAGTAATAGACCACATAAATGGC
TGGAACAGGCGATGCTGTTGCAGATTCGTCCAGCGAAGCCCTATTAGTCCGTAATCTAGCCGTTGAAGTTCAAGCCGATGCTGACGCTGCTGCTGCCTCTGCAGCCGCTGCTTTAGTTTCAGAGAATAACGCTGAGACTGCTGCTACAAAC
TGGCAATAGACCTTATATTATTATTTTCACTATTTGGAAATGATTTTATTCCACAATTAATAAATCTAAATAAACTACAAGACGTGATTGAGTTGTATAAGAAATCAGAAAAACTTCTTTCGAATAATTCTTTCATCAAAACAACACAATT
CTTACCCGTTGCAGTGGCTTTTGATGCTGGAAACCTGGAGCCAGTCGCTGAGGCGCTACGGCGGCAGTATCGGCATGCGCGCATTCTCGTTTGCGCCGATGATGACTATTTGACTGAGGGAAACCCAGGCTGCAGCCGTGCCAAGGCGACC
GTACGGTGTAGACCCTGTACTCACGTATGTTTAAACGCAGATTGTGAGCTCACATTACTCAGGTTGGTGAGTGTTGTTTTGTACACTATGTGGTTATGGAACGTGGGGATTATACCCATACAATACGACCACCCGTGCATCAAGATAAACC
CAGGTTAAACCGCGAAACGTACAGAAAATCGTCCTCTGTGCATCCGTTGTACACTATTTCCGAAACGCCGTCTACTGGCTGCGAATGGTTAAAAAAGCCATTAAACGAAACTTTATCGTAAGGCCCGCCAATTACAGGAGCCGCCTCTAGC
GCGGAACTAATACAGGCGATAACGCCACAAATTCGCAGTATAGTGGGTTGGCTGCGAGTAAAGAGGACGTGGCTAACAAGTCAACATCGGTAACTACTGACCAAGCGTCAAACACTAAATACCCATCAGTTAAGGCGGTATATGATTGGGC
AACGGTTTCAGGAAGACCAACTACGCCGAGCTATTGAGAAAACACGTCAAACCCCACAATTGGGGGTGGTGTATGTATGAACTGTAGTGAGAAATTATTAAATAATAAGAAGTTTTGTGATGAATGGTGTCGAGTAAGACTACGAGGTAAG
TAAGCGTTTTCAGGTTATGTTTAATTATAAAATAATATATTTATATTTGCATCATGTACAGAGAATTATTAGAAAATTAAGTATAACCAACCATGAATGTTTTGCGAATGTTCAGGTTTGGCGCAATAATGCAACCAGGTTGCATAAGAAA
GTTAGAGGGTCAAACTGACACTCTAAAGCCCTTTAAGGCAGTGTTACTAGCTCTGGCATGCCTTTAAAGCTCTTAAAAGGGGGTTTATACAGCCAAACAAGCTTTAAAAGGCCAACTAGAAGCATCTAGCACACTGTTCCTAGCTTGTAGT
GGCACTTCAGGGAATAGACGAGCAAATAGCCGGTCTTTCTTCACAAGAGATTGAAACTCTCCGAAACGTCCAAAATGCAATTGCTCAAGCTCAAGCGAGTGGAAACCAAAACGCACTTCAAAGCGCTCAGTCAACCGTCGCTAATGCTCAA
GTGTGGAATCCCCCTCTCCATAGACATGAGGGCCGCCGGTGCAATACCATAAGGGAGCATGGCGGCGCTTGCAGGTCCGCAGCGGATCATATCTTCACCCCTCTGCTTTTCAGCTCATCAACGAGCATATCCGTCCTGATGTTTTTTAGGA
GAGAGAGGTGTTTAACTTGAACAGAAACGGGAGAATCACTTCTCTAAGTTTCTTACATTCGACAACGAGTCGTGATCATCACAGCGGTAGCCTGGCAGTGGTAGGTGTTGGTATTTGACAACGATTTACCTGAACTGTCTACTAATGTAGC
CTAACCTAACCTAACCTAACCTAACCTAACCTAACCTAACCTAACCTAAACTAACCTAACCTAACCTAACCTCACCTAGCCTAGCCTAACCTAACCTAACCTAACCTAACCTAGCCTAACCTAACCTAACCTAACCTAACCTAACCTAACC
AGGATGATTGGCACCAAATACAGGCGATGAACCGGTCATGGGGAAACATGAGTACGAAAATATACATCAGCCGAACTTTCACTAATGCTCAATAATGCTATTCATGACGAAGACTACGAAAAGCTTCAGCTATCAGGGATGAAATTAACCG
TATTTCCAATCCAGTTCTGCCATTGCATAGGACTTACGCTAGCAATATGATTCACTCCTGTCAGTGCCGCTGATGCCACCAGAGCACCGTGACTCATAGAAAGGTTTGCCGCTGTCTTTGGTGAGTTTAGATAAATTGGTTGCTCAATAAT
GATTCATTCGTGAGTTGAGCCTAGTACTGTCGGGAGCCAATCCGGCGCGCTTATTGACAATATTACTCTTGCTCACTCCGATGGTGAGATGGTTACATTGGATGACGAGGCCATTATCTATACTGGTTTGGAACTTCATCACGCCGATGGT
AATGGCACACAAATTATTTTGGTGATTGACGAAGCCCATTTGAGCGCCTTTACAGGGCCACAAGCTATCGCTGTAAGAAAATTAATCAAAGCAAAGTTGGAAGTACTGGTAACTGCTACACCTAACCAACGCCCACAGCGAACTGTTTTCA
CCAGCGGGCAGGTTGTGGAATTCATGCAAGGCGGGCGGTGGTAGATCGGTCCGCCAATATGGCGCTGGGCTTGATGCGGATGGCGGATAGGTTGTCTGGATCTGCCTCGAAGTCCGCGATGAGATAGGTAATACTCGCCGTCCTGGGCGGC
CTCTCTGAAGTTAAAATCACAAAGCCTACTGATATACAGAGCAAAGCAATACCAGCAATTCTTGAAGGCAACTCAATCATTGGTACATTTTCATGTAGGCTGCTCTGAAACAGGAAGCGGGAAATCATTTGCTTTTCTCATTCCCATTATG
ATGGTTTACCTAAGTTTAAATACGGCAAAGTTTATGACCGAATGGATATGCCTACTTTCTTTGAGATGTTAGAAGTTTATAGAGAACAAAGACATCAAGCGTTTGTTAATGCAATAGAAGAACAACACGCTCAATTTAAGTCAATGGGTGA
TCGGAAATCTGTCTTGCCATCCAAACGGCATCACCAATTGGTTGTTGACAATCAGCGCGGCAGTCACAATTCTTGATTCCTTGTTTCCGCCTTGATAGAACGGCACACACTGACATTTAACTTTATTGCGGATTGTCTTTTCGAATATAGC
GAGTTATTGTAAAGCCATCAATCTCTGGCTCAATACTCCATATGCGTATATTGCCATTGGAATCTTTGATATATAAGTCAGTCATTCCATTATCCTCTGTTTGGTCTAGGCTATATTATACTCTAAAATAAAAAGCATAGCTAGTCAGCTA
GAAACTTTTATTATATGAGATATAATTTTTACTTCTCATTATTTTCTTTAGTTTTATTTTTAATATGATCTTTCACGGCTTTTAATTTCCTATCGAAATCCATTGAATTTTTCGCTTGATTTGAATCAGCTTTATTATCGTTAGCTTTTTC
CTCCGTGCTCATCGAGAAACCGGCGCGGGGCGACTTCCTCCCGATCGTCGACGGCGGATATTCCCTGCAATACAGCCCGCTGCTGGAGTTCCACGAGGGGCGCGGGCTGATCGTGTTCTGCCAGCTCGATCTGACGGGTCGCACCGAGCCC
CAGTCAAATTTTTCAACAATCAAAATATAAACTGTTAGTTAAATACGGTCTAGTTTTTCAACAGTCGAGTTTTCAACAGTCGAGTTTTTCAACAGTCGAGTTTTCAACAGTCGAGTTTTCAACAGTCGAGTTTTCTAACAGTCGAGTTTTC
CAAGAACCTGCAGATGGAAGCATCAAGTTCCTGCCCGCTTGGCAAGCAGTTTTGCATAAACATAAGTGAGATCTCACCTGATCTAGAATGAGAAAAGCCCAGATCATAAGCATGGATTTCATAATCACCTTTGTCATCTTCATGTTTGCGA
GGTGAAGCTCACTTCACCAGGCCCCATCGTATTTTGGTCAGACCTAGTGGGGCGTTACAACCGCATCTTCCGAATGCCTAAATTTAGAACCATGCAGGTCAACACACCCAATGTGGCAACCCATTTGTTAGTGGGCGCGGGAAGCTATCTC
CACACCACCAAAAGCGCCTAGCATCCACGTCCAAGGGTCAAACCCTAGAGTGGTAGCGACATAACCGCCGACAATTCCTGTCAGGGTAGAAGCTGCAATTGAATGCTTTGATGCGAGTAGCGACAAAATCGCAACAATTATTTTTCTTCGC
CAGCGCTAGGCTTACCGCCGCCTTTACCGTAGCCCTTCATGCCGGGGCCACCCTTCATACCCTTACCCATCATAATATACGCTCCAATGGTTCTTCGCAGGTCCGCAGTTAACATATCAACACAAGAACGAAAAAGAAACCCCCGGTTTTA
GAGCCATGCCGATCACATCAGGTTTATGAATGACTTTGTATCACACCCAGACCCCGCATCAGAATGGTTGTTTAATGAACCGAAGGTAGAACTACTAGGAGCTAAGTATGAGTAGAGGACTGATGGACGACATCCCTTTGCAGAACACAGC
CCAATTTATCGCATGGGATCGGTTTTGGGAAGGTTGGGGTCGGCGCAAGGGCCTTTGGGCCGACATCAACCCAGCTGTCAGCCCTGCCGGATTGTCAATTGGCAGGATGTGCCTGTCGACCCCCGTTACCTAATCTCTGTCCCATCTGAAA
TGAGAAAAATTGAGTATTACACTATTGAATTCAGCTACTCCCGTTGTGACTGTCACGCTTAGGTAGGGATTGGGTTTGGGCAGACACACCCACTGGTTTGTGTCCTCTCTAAATCCTCTAGAACAGTGATCCACACATTTGCTTTCGATTC
AGGTACGAACGGCGCGCGGTATTCACTTGTATACTCGCTGCACAAGTGAAATCAAGAACCTTCATTTTGGAAAAATCGACGTCAAAGGAAGGGGTGGGTTAGTAACTCTTCCTGGCTCCATTCACCCCAGTGGTGCGATCTATACCGAGTA
CCTGAATTTGTCAACTGCTGCTTCAACTTTTGGTTTTCCGACACCGCCATAAAGAAATGGTTGTCTGTTCAAGTTTACTGTCTCGGCAACATCATCATCTATGACAGTAAGTTTTCCTATATCTCTTAGTATAAATCCTAATGCTGTAAAA
TGGGTAATTAGTAGTTGTGCCGCTACTAATAGTTGTCCACGTAATACCATCGGTAGATTGACCCAGTACACCTTGACCACCTGTTACCTGATGTAAGAAATATCCATTACCATAAATTAATCCATTTGTTCCAGACACTGATATTGCAGTT
GATTTGTTAGCTGACCAGCTGACCGACGCGGGTTTAACCGTCGTTCAAGACCCCCGCAATGTGACCCCGCCTTGTGTCTTATTAGACGCCCCAAGTTTTACGGTCCCCAACGCCAAAACCGTTTCGGTGACTATTCCGTGTCTTGTACTTG
GTTTAGCCGTGAGAGATTTTGCATCAAAAAATACAATGGATCCTACTTTTAGTTGTCCGAATATCCTTTTGTTTATAAATATAAGTTTTCAATGAATAAATCTTCAGTTCAGTGTTGCCTTTTTGGACTATTTTTCGTCTTATTTGGTCAA
TTGCGTGTCTCAGAAGTTCGCTTACTTTCAGGTCCACTTTTCCAGCATTGGAAAACGGATAGATGACAAATGAGGCCGGTTCGAATTCCCCTTTCGCGGCGACAATCCTGACAGGTACCGCCAATGCGCCGTCATCGGGATACGTGTACAT
AAAGAGGATGAGTGGGAGACAGTAGGTAAATGGATGTGGGACAATCGTAAATTCTACAACGGATTATCGGTTTTACCTTATGCAGACCACACTTACAAGCAAGCTCCTTTTGAGGATTGTACTGAAGAAGTTTACAACGAGATGATTCAGC
GATTAATATCATAATCTACATCGTAGTACATTGGTGGACACATTAATAATTTAATCATTAGATTTCCTTAACAACGATAATTATAGATTTATTATCGAATTTAGTCAATCTAATTAATAGTCATCATCGTTGTGAGACTCGCAATTTTGAA
TAAAGTTTTAGGTTAAAATGCCGATATTTTTTTAGTTCATCAATGGTAGCATCATTTTTTAATCGATTTGCTCTCCACGAGATAATTTGAATATTATCTATATGATATCCTCGAGTACTATCAATTCTATCAACACTATAAGAATTATCTT
GGGAGGTCGTTTGGCAACAGGCCCACGCCAAGCATGACGCATCTTTCAATGCGGAACGCACGCGCCTCTGCGCCGAATACGGCCCCCGCATCGCCACCGGCGAGAACGCCGCACTGGCCGGCATTTTGCGCGATGCGGCGGCCAACGGCAT
AGAGCTTCGCATCCCCGAACTGGCCGACTGGTTTGGGGATGACGATCCGGTGTTTGTCGTCCGTGGCTTGTCCGGCATTGAGCTGGCCCAAGCGATGGAGGCCAGCAGCACCGCCAAACAGCGGGCCGACTTGGCCGAGGCGCTCATGGAC
AAATCATTATAACGCTGAACATCAAATAGTAAATTGCCTTTTTTGACTAATTTAGCCCAGTATTCAATGGGTTGGATGTTTACATGGGTTGGGTCTCCCATATACATTTCTTTGGTTTCGCCATCCCTAATTGCATCTAAACATAAGAACA
GGTAATCAATTCTTAGTATCTAAAGACGATCCCAAATATATTAGTGGTGAATATAAATTTATGTGGATAGGTAAAAAACACACAGAAGAATCAAAAAAGAAAATGAGTGAATCTGCCAAAAACAGAAAAATAACAAAAGAAATGGAATCTA
AAAATCCTGTTACATAATGAACGCCATTCCAAATATTTACACCTTGGTCGTTGCTTCCCGAAATAATAACTTTATCCGATACTTGAATGTTTTTACCTTTTATGCCGTTAGCACGAATTGCTAATTTATAAACTGAAACGTCAGCCCACCC
GATGACAGCCTCGATCTCCTCCGGGTAGATATTCTCCCCCGAGGCTCCGAGGATCATGGTCTTGGAGCGACCGCGGACATAGACGCGGGAGTCTTTGATGAGGCCGAGGTCCCCCGTGCGGAACCAGCCGTCCTCGGTGAATATCTCTTTT
AATCAACAGCGCCATTTAAAATTGGCCCACCAGTTTGTTGTGTTGGGCCACGGGTTGATTCAGCCTCTGCCATTTGCTTGGCTTTAGGATCAAACCCCGCATATGAACCACGACCTCCGCCCGCCATGCTTTGTTGCATAGGTTGGCTAGA
TGGTAGTAGCAACGAATCCGTAACTTCTCTTCTTTTGTCAGCCACTTAGGTGTTCGCTGCATCTTAGCAGCGTGTCTCAAGGCAGTGTTAGCGTTTACCTTGCCTTTGTTGTTTCGCTGCCATCGTGTAGCGATCTCTCGAATCTTTTCAC
GTACCACCAGTAGTACCATTACCTACCCCTCCAACTATAGAAGCAGCACATCCATTATTAAAATTATAAAGACCGCCACCAATAAGCGCAGCTCCTCCACTCACAAGATTTTTACAACCTGCCCCCATGAAAGTACAAACACCTGTAGCGC
GATCTGCATCATTACCGAGAATATCAGCAGGTACAAAAGACTTACCGCATATCCCTGTCTGGCTGATGTTCCTGCATCAAGTCGGTGTGGCGAAAGATACGCCCGATGGGAAGGTAAGTCCGACAGGCTTATTTATGGCGTCGATTACCCA
AAGGCTAAAATGACGGCACATGCTCTCTTATCCGCTTCAGGCAGTAAACGGTGGCTATCCTGCACACCATCTGCCAAACTGGAAGCAACCCTACCAGAACAAAAACGTGGCTCCAATGCCTTTGACTTTAGTCAAGAGGGCACTATGGCTC
TGGGGGACTTCAGCATTGGGGCAAGCTCTTTGTCAATGGAGGCAATTCGCGCTTTAAACGAATCCAGCAACAGACGCTTTTCCTGCATATCTTGCCGCGTATTGGCATTCTTCATCTGCTCCATAGCGGATTTGTAGTGCATGTCTGCGTT
AAAGACCAGTAAAACAAAGAAGGCAGAAAAGGCAGAAACAATTGCAATCTTTTCTTCTAGAAATGTTACTTGGGCAGCTGTTGGCAAGGTATACCGTGGCTACAATATTGTAGACAAGGAAGCTGGCGAAAAGTGGCTCACAAGAGATCAC
GGCGGAACTGATGCGTAATGCGCCCAACTTTCCTTGATACCTTTTTTCCATGCGTCTGGATTGTTTCGCTTTTGTTTTAGCTCTTCTAAAAAAACGTTAAATCTTGCGATGAAGTTAAATGTATTTGTTCAGATACAGGATCATAGTCAAA
GTAATTCCAAGCGCTGTTAGAGAAAACAAACTAGCACAAGCTGAAGATGGTTCGAATTATTTAACAGTAGATCAGGATAAGATTGTACCATATCCTTGTGGAAGCAATCAAAGAACAACAGAACATGATTGAAAATATGAAAACTGAAATG
TATGCGAGGTTGCAAATAATAGTTTCTAGTTTAGAGTCCTCATCCAAGAAACAATAAAAAAACCTCAATATATTTAGCCAATAGCTCCTCAAAATCTGATTCATCAATCTTTTGAACTTCGCTACTAATCAAAGGTTGCTTCATATCTTCA
TCTGCTTATAGTTCGCGCGGATATAGGCGGCTTCTTGGTCGGTTTGATTCGGCGCTCTCACGGCGAATAACTCCTCTGGGAAATCACCTATCTCGGCATGAACTTTAATCGACTTCATATACTGAATCGATTTCTTGTAGCCATTCCAGTA
GTCCTTTGTCCTCAGTGCGTCCGTATTTTCTCATCTGATCTAGCAGTCCAGTACCCCAAGTAGAAGTCGGCTTGTCTAACTCTTATTAATACTTGACAACTGGCTCTTTGCGGACTGGTCTAGATTATGATTCATCCTCTGATTCTTCCTA
GTTCCATTTGTCTGCTCAGACTTAGTTTGTCAAGTCATTTGTTTCTAGTCTTCGTTTGAGCAATTCTTCCTTTGCCAAATATGCTAAGGGTGACATAAAAATTATCAGCCATTATTCCCGCTCTGCAATTATCTGTAAAAAAACATTGGCC
TGCGGCAAAAACGGTTTTGAACATGAGACCTTCCTTTCGTGCCGAACATTGTACTCGCCTCGGAGTGCACGCAGACAGATCTGGAAAACAAAAGGCCGACATGGCGATATACATTTCAGGTCTCAGTCAAAAGTATTAGCGCTCGAGGCCA
TAGTTCAAGTTGCATCAAATCCTTCAAAGCCTGGAGCCTTTCATCGCTACCATGAGCGAATCCAACAAAGTTCTTTCCCCAAGAACGATACTTCCGAGTCATCGCCTTGTTGTCGATAGCTACATCGCTACAGTCGTGATACCAGCACTCC
AATACAGTTAAAGATAAATACTTTCCAACCAGGTAGTTTCTCACAAAATTATCAATGAAAACATAGGCTATATTTATCCTGGATCCTTGAAAAAAGGAGAGATTCATCAAATTATGGATAAGTTCTTAGATAAAAAAGGTTTGATTGTCGA
CAAAATCCGCCTGCACAAACTGCATTACACCTGTCAAATGAGGGGGCAACGGTCTACGATCAATACCTGTTACTGTGTGCCCTGCATCTCGCAACTGCAGGGCGATTTGGCCGCCAATGTATCCAGCGGCTCCTGTTACTATCACGTCNTT
TAAAAGAGGATCCCGAATTCGGGATCCTCGATCTTATTTTATATTATAATGTTACAGTCAATGTTGCAGCACTAGAGTTAACGGCAACTGCCTCACGATTTGCAGAAACAACAGCACGATATTGATCAGCGTTGTCATCAGCAACAGTCAA
CCTGGGGCTACCCCGTGTCCTGGCCTTTTTCCTGGTCTACACCGCCTCCCTGGCCTTCGTCGCCCTGCTCCTGTTCGGCATCCTGCCCCTGGTATCCCGCCAGGTGACGGAACTGGTCCAACAACTGCCGGACATGATCAACCAGGGGACC
TATCAAAATTTAATAGAAAACTTTGGTAGACAAGCTGGTTGGCAAATGGGTCAAAATACAGCAGAGCGTATACCAGCAATCCAAGAACAATTAAAAGCTATTTTGCCTGAAGCGTTAAAAGCTGGTTTGTCACAAGAACAAATCAACAGCA
CAAGGCTCGGCAAGGCTCGGCACGGCTCGGCACGGCGGGGCAGGGCACGGCGGGGCAGGGCACGGCGAGGCATCGCAGGCGAGGCAGGGCGGGGCGCGGCAAGGCACGGCATCGCAGGCAGGGCATGGCGCGGCCGGGGAAGGCTCGGCAC
CCCATCTTTCCACTGATCTTACGACCTTTAGTAGCAGCACCATAGCCACGCATCTCACCAACACCGTATGGATTCTCTTTAGCGTAGTTGCCTTTGCTAATTCCACCAACAGAAATGTTGTTTTATCAAGTCCATTACCAGTCTTGGTAAC
ATCTACTTTTCATTTTTAATCTTTTTTTCTGTTTTCTTATTGTTTTATTCAATCGTAGTTTATGAACAGCCAACGCTGCTTTATTTACGATATATCATTATGACGATGGGTTAATCAGAAGTAACAAGAAATTAAAAAAAATATAAATCCT
CTTCGCGGACGTATCCTTGCAGAGCGGTGATGTACTCTAACGGCTCAAGGCCGGGAGTAACGAATGAAGCAGGGTAGGGGGCAAGAATCACATCGTAAGCACCTTGGATTGATTCGGCCAGCCCGTCCACTAAATCAACGATGCCGTCATA
CATTGTAAAAGAACTACATGAGTTGGCTGATTGGATAGAGAAGCGGAATGGTGTTCATTGCCATTCCGTTCCTCGCAAGGCCGCTTATCTAATACATGCCTTAGAAGAAGATAACATTCAGTTACGTTTGAGATTGAACAGAAGAGACTTA
TTTTAAAGCCAATTTAATTATTTTTGCAAAAATTAAATTTTAATTTTATTAATAATTTTATATTGAAAAGAAATATATAATTTTAAATTCGATAAAATGGGTTCAAAGAATTCATCCAGTGGAAAAAACAGAATAACGAAATTAAAATAAT
CTTTAGATGATCAATCAAATCTTTCTGATTATTTGAATAGTGGTGCGCTTGATAATCTTGATGGAAAATCTCAAGAGCAGTTAGATGAAATCAATGAAGTTCTTGATGAAATCATTAAGGGTGGTCGTGCAAGGCAATTGATTATAGACCG
TTGCAAAATACTTTGCGGAGCTTGTAACCCTCCTAAAGGAAAAAGAAGATACCCTCTTCCCTCTAAAAGAAAACTCATAAAACAAAAAACACCCTCGGGTGTTTTTTAAAATGTTTATTTTTCTTCTTTACTCTTCTTTACTTTCTTTACT
AGTAGCATAATTTTTCGTTGTGGATCTTTCCTTAATGTGTTTACTAAATCTATTAATATTTCATTTCTTTTTTTTATTTTTGTACCAAAATCATTTACCATTTTAGTACAATTAGGTAATCTTGCACCTTTCACTATTCGCGTCGTTTACC
ATAGGTTGCGATTTTAACTTATATCGGCACCCGCAATAAAGCTGTCATCAATTATATCAATTAGTTCAGGATAGTCGGGCGTGGTTTTCAAAATCGTGGTATGATAAAATTACTTTTGTACCTTTTGATTTCGCATATTTTACCAATTTCT
GATGTTTGAAGATGCCGAGAGATATCACTGGCTCAAGACTGCATCATGGGACTTAACCTGAGAATGTGATTGCACCGACTGTGATTGCTTGTGATGGTCGTGGCAACAATTGGGAATGGCTCACAGGCATTATGCTTGATGAAGCTATTGA
GCCAAGTACATGTTTGATATTTGGTGACTGTGTCTGCTGACTCTCAGGGATCACGATGTAAACCTCTCCGCTGCCGCCACGAACAGGGGTAGAAGGCTCATAGAGTGTGTCTGAATTGTGTGCATAGCGGGCGCAGCCGCTTACCAACAAC
TATCAGATCAATTAACTAATTGTTTTTCTGATTGTTCATACAGTCAAATAGCTCTACCTGAAATATCCTTTTTCGTAACTTTCACTCAAGCTTGTCATTTTAACTCTTCATTAAAATATCATTCTACTCAGTACCTTCACTCTCAATCATT
GGTGGTCATGTTGTTTCTAAATCTCATATGAAGATTAGATTCCAACTGAATTGGATTGACATTTAAGCCTTCCGAACCCCATTCAATAACCTGACGAATCTTAGTGATATCGAGTGGTACAACTTCACCATCTCTCTTGACAATTTTATAA
GCTTGACGCCGGCAATATGGGGAAGAAACGATTGAGAAACTTTGACTCGACCATCTTCTCTATTTGAAATGGGGCTTGTCAAATCCGACACGCCGTCATTTCCACTCATAAGAAACTTTATTTGTGCGTCAGCTTTTGGTGTCTGAATGAC
GGTTTCGGCAACAGTCATTGGGCTTACTGCAAGATCAATTTCGTCATTGTTGACCTCGCCTGTGTAGCGGCCAACGGTTGCAAAGAAAGTTTCGGCCGTAAAGTTGATCGTATTCTTTCGTTCGGCCATATCGACAAGCTTCACTTCGGTA
AGGGTACCCGGTCTACGTATGTCAGGCTTGCGGAGCAGTGGAATCCGTTGAAATTCAATCCGGAAGAATGGCTTGACACCATGGAAGCCTCCGGTATGGAATACCTGACCATTACTACCAAGCATCACGACGGTTTTGTCTTTGGGGAACC
GATGCCTTGAATATTGAGATCGATGTTCTACATGGAGAGTCATGGGATGATTATGATACTATATTTCTATATCATTCCATGGAACAAGATGGAGAAACACTCAATCTCTTTGGAGGAGCAACTAAAGAAAATGCTGTCTTCTTCGAACGAA
ACGAGCCTGATTGACTTATGTCGTAAACGTAATCGGTTCTGTTACTCTTTTCATATGTATACCATTTGCCGTCGTTGCCAGCTACAATAGTTCTGGTCATCCATCGCATGACGCGCGCGGTGTCGATGCCGTCCGCTGTCGTTCCGCTAAT
AACTTACCATCAGCACAGTATTTGGCAAAATTTTTAGATTTATCTTCTTGGTAGCTCATATGTATTATTCTTAAAATAGAAAAATATCTTTTGCCACATCTGGCAGATATTTTATGTCTTTGGTCGCTTCATAAGCTAGTGCTTTTAATTC
ATGGAAACGGCGAGAGGACGTTTTTCATAAGCTGAAAGAGATGCAAAGTCGGGGCCAGCCATTTCATCCGCAGCAGGTGGAGCACGGCGTCGCCCGCCGCTTGAAATTGGCCGCCGGCGGCGGTTTGTCGTGTGGTCGGATTAATGCATTC
CTGCAGCAGCATCTGTCACTCATTCTGAGGAAGAAAGCCGCTCCAGGCGATGAGATTATCGAGAGAATAATCAAAGCCTTAGAACTTTCGGATGAAGAGGCTGTAGAGCTTCTCTTTGCGGCCAAGATCGATAAAGAAGCAAACCCGCGCA
CTCTTTAGAAACTTATTAACAAAAAATAAATAATCCAAGGTAACTCTTTGGCATTAATTTTAGGGATTTTGCCAAAATTCTCTAACATCCAAGAAGCTTTGAACGCAGGATAACCTGCAAAAAGCTCATCCCCTCCATGCCCAGCCAAAAT
ACCAGTGAGTACGTTATCAAGCAGCCATAGGCTAGCATCACCGGTGTATGCACCGAGCTGGAGGAAGGTCAAATTATCCACGCCCGCTAATGGAATTAGGTGCTTCTCAAAGTTAGGTTTGGCGTAAGCATCAAACCAATTAGGGAACTCA
TTCAGAAACGCACTCAACTGCGCTTTTAAAATGTCCAACGCTATTTGCCCATCCGCACCAACAATGTAACGCTTCGCTTTTAGGCTCTAATACTACAAATCCTACTGGGTACTTATCTACAGAAAATACCCATAACATTGCTCTACCGCTA
TCACAAAGAGCTTTAAGACGCTGGCTTTGGCCTGGCCCTCACGCTTCTCGCGTGATCTGTATTCCGGTGCGTTTGCCGCCGCGATGCGTGGTTCATACAACCCCATTGACAGGTATGTCGGCACGCAGCTGCGGAAAGGCAACTACGATCC
GTGGTGGTGGCCCATCGGACCGTGCCCTGCACGGTGGCCGCAGCAGCCACGGGCACGGGGGGAGTGGCAGCAGCGGCGGCAGTGACACGAAGACGAGTGGTGGCCCGGGAGGGTCAGGGTCCTCCACGACGTCAGACGGTGGCCTCGCAGC
CATTGTAAAAGAACTACATGAGTTGGCTGATTGGATAGAGAAGCGGAATGGTGTTCATTGCCATTCCGTTCCTCGCAAGGCCGCTTATCTAATACATGCCTTAGAAGAAGATAACATTCAGTTACGTTTGAGATTGAACAGAAGAGACTTA
ATTCTGCATCTTTTGCATATCCGGCTCGGCCTTCTTCAGCACCTCACGGCCGCGCGTGAGATTTCCTTGCAGGATATCTTCCTTCGATCTGGATATCGCGGAAGATATATTGTTCATCTCAAGAGTAAAATTGCCGTCGAACTTGATCGTC
AGGGGATTTTCTCCTAGTGTTTTTTAACTCATACATAAAGGAATTTAAAATGACTCGTAAATCTACTTGGACTAATGCCGATGGCCTAGTTGTCGGTTTTGGTGCTAACATCCCTGAGCGTCAAGCTGCTGGCGTAGTTAAAACTGAAGGC
GATGCAATAAAAACCATCCTCGGAATTGACGATAAGCACTTCTATGCCACAAGATGTGAAAAGGTAACGACCCAAAAAAAGAGGACGAATGTACGATCATCAAGATAACTCTAACGACCCCGAAGACCGCGGAACAAATTTACCAACTGAT
GATGACATGAAAGAGACCAATCGGGTGATTCATGAGACCTATGTTCGCAAAGACGACTATAGAATCGAGATGGCTAAGATAGAAAGCATGTTTCAGCGCATCTTGACAAGTTAGACGCAAAGGCAGACAAGCCATGACAATGCCCTCACGA
GGGTGAAATAAACAATTCACTGCAAACACCGGCACGGCAATATTTATGGCGGATATGTTCGTCGTATTCATGCCTGAAATACTTGATGGTACTAAGGACCGGATTCGGAGCCGTCTGACCCAATCCGCAAATCGCCGATTCTTTGATCGAA
CCGCGCCAATATGTCGTACCTGATGCGCTCGTGCCGCTGTTGAGCCGAGATACGGAAAGGTTGCCCGTCAGGTCAGCCGCAGAGCCAGTTGATGCCACGGTAGCCAAGCCAAGGGTCGTGCGCTGAGCCGCCGCATCTGCATCGTCCAACA
CACGCTGTGCCAGAACTGGGCCATCTCCCACAACCAGCTGAAGAGCGGTGAGTGCTTCCAGTCAATATCAGAGGAACAACCTCGCCAACAGTCCCACCTGTTCGCTGCTATTTATAAGGAGAGCATGGAGTTATATGACTTCAATACTCGC
AGTTTGTTCTAATCTATTTATTCCTTCAGGTGATTTTTGAATAATTTTATAATTGAAATTTTGGTTATTATCCCTAAACGTACTAGATAGTATTTCATTTTGATTATGCTTATTAGATTTAATTTCGTTTTCATCAATTATAAATGAAGAA
CACAAGCCCGCCGACGGGTGCTTTTACCTATTCGATTTACGTCAAATATGGAAAGGTTGATCCAGGCTATGAAAATAGCTTCAACCGTGTCATAGGCGGAACATTTCTGGAACTCAAAAGATGATTACCATTACCGAATACGACGAAGCCA
GGCGAAGGTGACCGGGCTGCCGGTGGTCTTGGCCGTCCACTTCGAAAAGCGCGTGAACATGGAAGACGATTTGGCGGGAGTCATGGGGTTCTCCTTGTCTATCTCTCTATCCGGTATTCGACGCCGGCGCGCGTCTCCTCCGTGCCACGCT
ATAACCTACTGTGTACAAAATATCCACATCTATTCCAAGATAGATACAAACCCATGACCGCGACATGTATGTGTTGGGGATTCTCACATGGCGACGGTTGGTTTTAATATTATCGACCAATTGTGTGAATCTATCGAACACCATATCAACT
GCTCGGGTATAGCCGCGAAGAAATATTGAAGATGAAGATATCCGACATAGAGTCCAAGGAAGGCCTGGAAGCTATTCAAGTTCGTATCCGCAAAATTAAGGAAACAGGGAGCGATTCTTTCCAGACCAAGCAGAGACGAAAAGACGGCGCC
TGGCTGGCCATCGAAAAGTAAATATTATATCTGAAAAGAAATTGAATTATTGTGGGATATGGAGATTGTTGATAAAATAAAGTTCTCTCAAAAAGATCTAATTTGACTATAAATAAAATTAAAGAAATTAAAAACATATTAATAAATAAAA
GGTTTTTACGGCAACGGATGACGGGTCTGTCGGCGTTAAAGGCCGTGTGTCTGAACTTTTTAATAAGATAGCTATCGCACCGTCGACTATGATCTATACTTGCGGGCCCAGGCCTATGATGGCCGCCGTGCAGGCGTTTGCAAAGATCAAT
TACATTATCTTTTAGTAATGCACCCAATGTCAAGTGTTTTATTGAATTTCCACTTCTACGATTGAATCGTCTAGTTCTTCTTTTGTCCAAGATTCTTCGACTGTTTTGCCGTTTTGTTTGACAAACTCGGCATATGAGCTTATCAAATACT
AATGCAAATGGTAAAAAATTAACTAGATTTGTTCAATATCAAAGCACCAGTTTTCTGCGATGTATTCAATGGAAATCTAGCAAACGGTTATAATGAAGACGTTTGGAATAAAATGAGTGGAGCCCAAAAAGTGGCGCTCAAAAAATTATTA
CGACTCCTCCAATGAGACAGTACTTGAGTTTTCCAGAGTTCCATTCTCGTTCTGCAGCTCGAAGTAGCTCTGTAAGGTCTTCTTCCAACTGGACATTGAATCGGGCATCCCATTGTCTGTCTTCTGTTTGGAAGGAGACGTATCTGTTGGA
ATGTGGTTGTCTGCTATCACATCCACCATTATCTTTAGCATATCTGCTGTTTTCTTTAGATCGTCTGCAATTTCTATAGGAATTTCTGCTTCTTTTCCGTTTGTATGCAATTTCTGTATAATATGAATGATTGCCATGTCCGTATATCTCC
GGGGATGGTTGCGGCAGCATCGTTGGCTGGATGAGGATGAGGCACCGGCACGACCGTTCAACCCGTATGATCCGGTCAAGGGTGAAAAACCGGCATGGAAGGCGGGGATTGAGGATCCATGGTTGGCCTAAAAGCAGAACGTAACCTGATC
AAGAGCAGCACGGCCAGCGGATCGCAGGAACCCAAAGGCATCCGGACATATATCCGTATTTCCTAATTCAACTATAGACCCTATTGGTGCCGACTGATGGCCTTTTCGACAAGTGGGCAGAGTCTTTCTGCCTTTAGGGAACGCACCGAGC
AGTCGAGGCAAAATATGAAAGTAGGATTTTAGTAGCAACTACTCCCGTAATGATATAAAATCACTTGCTTGAAGATAAACAATCTATGTAACAAAGGTTGACGATAAACTGTACTAGCAGTTGTGTTTATTGTAAAGGTATGAAATATTGT
GATGACATGAAAGAGACCAATCGGGTGATTCATGAGACCTATGTTCGCAAAGACGACTATAGAATCGAGATGGCTAAGATAGAAAGCATGTTTCAGCGCATCTTGACAAGTTAGACGCAAAGGCAGACAAGCCATGACAATGCCCTCACGA
TGAGCGGAAACAACGGAACTCAATCGTCCCTGTATGCTTCATGCAGTAAGTGTTGATAGCATAGCGGAAAGGACGACCCATTTGACACGCCATCTTTACCAGCAGCGTGTAGCTTAATGAAGTGATTGAAGTCCGTGGCTAGGTTGATGAT
GCCAACTGGCGGGTGCGGTATGGGCCGCTCTGGGGCTGGGAATCGTCACCAAGTTCCTCGAAGGCTGGGCCGGTGCCGTTATTGCCAAAGTGGCCGTTCTGGTCTTTGTTATTGTTTTTATCCAGAAGCGTCCGCAAGGTCTGTTTGCACT
AGAGTAATAGTATTTTTTTGAGAATAGAGACCCACGTGGTGCACATACATTATGGGTCACATTTGCATGTACAACCAAAGGTGGGGCCTTGGTTTTGACCAGTAATTCCTTCTGAGTCTGAGGGGATTCGAACCCACGCCACACTAATATC
CGGCGGGGCGGCAAGAAGTTCCGGTCTTGCCGAACGTGCCTCAAGTTGAGGCTGGGGCGTGCGCTCGACTCGCGTCTATCGAAGAGGCGCGTGCGTATACGCGCTGGGCGACCTCTGCTCACAGGGACACCTCTTGACGGCGGAGACATCG
GGAATATTCGATATGTTAATCTGGATAAAGACTGAAGACGTATGCGTATGCAAACACATCATCTGGTGTGATCTTAACGACCGCTGTATGAAGGGAGAGAAATGAACACTCTCGCTGCAATCGGTATTATTGTTATCGGTATATCCGCCGC
CGTGCAAAGGAACCTTTTGGAGTCATAACAATATTACCTTTGTTATACTCATCCATAGCTGCTTTTACCATGGTTTGTTTTTTATCTGGGTCTTTTGCAGCATTGGAAAGAGCTTTAACCAATACCATTACTGCATCTCCCCTATCCATGG
ATATATGTGCCATCTTGAAGCAGATTTTAATCCCATACTCCTCACATTTCCCATTTCCAATCAGCATTTGATTTGATGAAATAGCTTTCTCCTTACAAACACCCATGGAGTAGTTTGCTTCTTCTGTTGACCCATTGACATATGAAAATTT
ATCCCCTGTCGGCGGCGTAGCCGCACAATTCTTCGATAACAGCGGAAATGTTCTGACTGGCGGTAAGATTTACACTTACGCAGCAGGCACAACGACTCCAACACCGACTTACACAACTAGCGCAGGCAACGTTGCTTGGTCTAATCCTATT
GTTAATAATCCAGATTGGATACTTACACCAGAAGGAGCAACTATATCTGCAGCATGGTTTTGGAATTCTAGAAACCTAAACAAATTAGCAGATGCTGAAGATTTAAAAGAAATTACAGAAAAATAAATGGCGGATATCACGGACACGAAGA
GGCGGCGAGGGGACGGTTGGCACACAGGTTTATCGCACCAGCGACAATTCCCTGTTGGACGTTACCCCGCGCACAATCATTGCTGACATCACCACAGGCGCGACATACGGCCTGACAACAACATCCAATCAGGCCACTGTTACCCTTTACA
GAGGTTCATAGTATGAAGGTAACTATCACATACCATGACAACGAGTCATTTACAATGGAGAAGTTGTAAACAGGCCGTGCATAATTATGGAAAAGCTGCAAAAGTAGATGTTATGCCAGAGTCTACAATGGCTTATGACTACATCTATTTT
TCCAGTAGACCGATCGCGCTCGTGAGGGGCCATCTTGGAATGGGAGAAATGCGCGATAAAGCCGCATATCGGGCAATTCGTTGGGGCGTCTGGGCCATGTTCTTGAACCGGTACTTTGTATGGTTCAGGCAACAGTGGAATAAATTGAAGT
CATAGCGATACCTAAATCATCAAACCCATGTAATCGGTAAACCTTGAAGTAATAATCGTTCCTGCGGCATCACACGACGCAAAATATTGCTATCGTGATGACGTATCACATCAGTGTACGATTTGAAATCTCGCTTTGCTAAGGTTGATGC
CCTAAATAATCTTCAGCAGTCTTTTTTCATCTTACGTAAGACTTCTGCTGAGATCTGAGGAGGTGCCATTTCTTTACCGTTAGCACGAATCCAAGCATCCCCGTTCTTAGATTCCATAATATCAAATGGCATTAGGTCTAAATCTTTTTGC
AGTACAAGGATTTTTCGCCTCTTCAAAAGCATGGTTCAAAACCTGGATTAAACCGGTTGGTATTGCTGTTGCAGGACTAGCAATTTTATTAATCACTTACTTTAATGTTAACACCTCAAGTAAAAATCAAAATACAAAAAATCAACCTTCT
CAAAGTCTGCGCGAGAAGTACACCGAAATGCTTGATCCGTTCAAGCAGATTTTTGACGACCTTGATCAGCTTTCCCAAGATTACGAGAGCATCTTCAAAAGTGCCGCCGAAAAGCGGAACGAGAACCTCAAGCGACTGCAAGACAACGTCTC
GCCAGATCTGGGTCAACCCTGCTCGGATCCATCCTAAATCAAAATCTCGATATTCATGTCTCTCCGACTAGTCCCTTGCTGGACCTTTTCTGCCTTGTTGAAAGTCAATTACAGAACCTGACTCAACAATATACCTATGATCTAGATCAGGT
ATACGAGATCATCAAAAAGACCGGCGTGTTGTCCACATCCGCGAGCGGCTGGGCAAAGGAACTCAACCTGATCAGCTGGAACGACCGCGAACCGAAGTACGATCTCCGCGATTGGTCGGCAGATCACACGAAAATGGGCAAAGGTGTGACGC
ATCTGGTGTCACGTTCTAATTCTTTAATTCTTAATTGTAAAGCCTTTAGACAATCAGTTACTCGGTGTTTGTTACCATAATAAGATAGGGATTCTCCACAACCACCACAAGTATTTTTTCTGTATCTGGACCAGAAGCTTTAGGAACCGTAA
GATGGAAGTGTCTGATATCCCGGATGTTGATTTTAAGGCTCTAAGAGCTGCAGGCAGTTGTGACCCGAAGAGCGAATTGCTGGTTACCATGATAAGAATTAAAAAACGATGCAAAAATAACTATTCATGCAATAGAAAAGAACTTTCTATCA
GCAGAGAGCTACATTCAGGGCAAATGGAATACCCCGATCTCAAGGCATTACTTGAGCAGCCATTCGCAATCGAACAATCTTAGAAAAAGCTATCTATGGCAATTGGTATGGATCTATTTTCTACCGCCTTAAACATTGGTTAAGGGATAACA
ATCATTCTCTTTACTTTTTATCTCAAGATCTACTTTAAGGTTCTAGTTCTCTTTTCTCAGTCTTTCTATCTCTATTTTAAGAGTTTAAACGTCTTCGTGTTCAGGAGTTACTTGGATTCTCAAATCCACTTCCCATGAGATCTTCGACTATT
TCTCTGATAGGGCTTCAAAGGCTTTCTTAGCATCACCAAATGCAGCGGCGCCTTGTTTAGCTGCCTCAGCCATCTGAGTAAAACCAGAAGTTGCCATCTCAAAACCAAACATCTCTGTTCGCTTTTTAGCTAGCTCGTAAGCCTCTTCTATC
AACAACATCAACAACAATTACAACAACAACATAAAAACAATTACAACAACATCAACAACAACAACAAAACAACAAGATCATCAACAGCAAAATATTTCTTGCCTGAACCATATGTTGTCCCAGGTTGCAATCCTTGAATATTAATCTCCTCT
CACCCTGCCAGACCAGCACTGTGCCCAATACATGCATTTACATCACCTTGCAAAAGTCGAAAATTTAACCTAAACCCTAATCTTTGAACCCCCAACCCAAACTCGTTTTTCTGATCTCCAAACACACTCTGTGACTCTTCCCTGAGACACGC
CACCCGCAGGGCTTCTTTATTTTGCGCGTCTTGCTGAAGAACTCGCTGGCGGTATTGCTCAAAATGTCTCGTTAGGATCACGCACCAAATTGCCAGTTTGGAACCGCTCAACGGGACCGCCTTCTTCAAACGCAATGATGCCCCCGCCAGCA
AAAGTACCGTTATCATTAGGTTTTCCTTCGCCTACTGCAAGAACTTTTCCTTTAGTTGGACGTTCTTTAATGTCATCGGATAACACTAATCCCGATTTTGTTTTAAGTTCATCATCGATCTTTTTAATTACTATTCGATCTCTGATAGGTAC
GTTTTGTTTCGTATAGTACCGTAAAAATTACGATAATTTTTTTAGTGTTTTGCATGAACCGGTACGAAACGAAATAAGTTTTTATATATATGAGGTTGTTGAAGTGACATTCACCAAAAAACACAAGATGTTAAAAATTGAATTTATTTGTT
GGAAACCAATTCCATTATTACCGAGTGACTTCTGAAGGTGCAATTTTGTGGGGCGGTTACGACGCGATTTATCACTTCCGCGGAAAAGCTCGTCAAGAGTATGAAACGGATGCAGAAACTTACGCTTATCTCGCAGCTGATTTCTTAGAAAC
CCAGACGCGGCGGTTGGGTCGGGTGTCGAAATACTCAGGGCCGGACGAGGGCTTCGCTGATGCCCGTGCGCGATTCAACCTGGATGCTGGGTGACCAGTCCGTTCCCCAAGTCGGCGCAAAGCGTGGGCCGATGAAGACCCGCCCGACGCTA
CCGGCAGGCATGGATGAAGTGGTTGCCGCCAATGGCCGCCATGTCGCCGTCACCGGTGAAGACGACCACGTGCAGGTCAGGATTCGCCATCTTGACTCCGGTTGCAAACGCGATTGCCCGCCCGTGGGTGGTATGGAGCGAATCGGTGAGGA
AAGGATAGATAATGGCAGTAAAATCAAAAGGCGGTCGCAATGACAACCGTCCAAATGGCAAGGCATCAAAGAAGAACCCAGGCCCTGCTCAACCACCGAAGACTAACTTCGAACACATCAACGGACGCAGTCCTGCAAACAATGCCAAGCGT
AGCCTCGGCAGTAAGGGCAGTTGGGGTCGGTGGTTTGTTTGACTGGCAGGAGCCAGTCGAATAGTTTGTCGAGCCACTTCATTTCTTCTCTCCTATGCCGTGGGCGGCTTCCAATGCGGCGCGTGCATCGTCAATGAAGTCGTTGCCGTGTA
GTAGGAAGAAGCTAAGTCTTTTACATCTCCTCCAAGTGACTGAATCACTGGAGCTACCTTTGGAATAGCGATAGTTATATCATCAAGAGATGTTACAGTCTGGTTTTCAACTGCGTTAAGGAAGTCAATGGTTGACGCAAGCTCTGTTGATG
GACAGAGTATATAATGATAAGTTACTTCTCCCTGCTTCTCCCTGTAAAAAATAGCATACTTTTTAGGCAAGCCAATACGTGGCATAAGACCATTTGTGGAGGGCATCCTTTTTCACACAAAGAAGCCTAAGTCCCCTTCACTTTCCACTCAC
AATCCACGGCGTGGTTTTGGTTTGCTAGGAGCAGTTGTTGGTTTAGTTACTGGTTTAGTAGTGGGTTGATTTTCAGCTAGTGATTTTTTGATGGTTTCTTTAATAAACGATTTTAATTCGTTTACTTTTGTATTTTTTAATTCTGAGACACG
AGCACTTGATTAGTGGTCTGACCGCAAATAGCGCGGTTTTCCCGACTTTGTGAGCCTTTCGTGATGCAGGCATTAGTGATCTGAACACTAATGTCATCACCACAACACCGGCTCACGAAAGGGAGAACGATGAGCCACCCACCGATCCGACA
AAGATGACGATGGTGTCGTTGATGGAGTAACCGGCTATGGTCAGCAGGGCCGCCACGATCACCAGGTCGATCTCGCGGTTGGTGATGGAGAGGGCGCCCGCGGCTATGAACACGTCGTGCAGCAGCGCCAGCACGCCGGCGCCGCCCCAGAC
GGCTTTGACGTTCCAGCCTGTGAAGTAGTCATCATGGCCCGTCCTACAGCTTCGCTCGGTCTATACCTTCAGATGTTCGGTCGTGCGCTTCGCCCGTTCGATGGCAAGCTGTATGGTCTAATTATCGACCATGTAAGCAATTGGAAGCGTCA
AAGTGAGTGTACGTCTCTTGGATGAAGGCTACGGTTATAATAAACATATGGTCTGCTGTCGTGTCGTACTCATGAGCCAAGTATAGGGAGCTGTGTCGTTCATCAAGTGAGTGTACGTCTCTTGGATGAAGGCTACGGTTATAATAAACATA
TATATACATACCAAATGATATTAATTATCAGCAAAATGTTTGTGTCGGTATTTTTCTATAAAAATTAACGGCAAAAACAAAATTTTGTAATTCAATACCAGGACATACTAATTGTAATTGATTAATCGTGGAAAAGGACAAAACATACACAC
AGAGCTGGGAAAATGTGCTGACCGGCGTGCTCGTGGAGGCAGATTCTGTTGTTTTCGAAGCTTATGGGTATCTGATTCTGAGCAGGACAATCTGAAAATCATGGAGATAAATTGAATAATTTTCATTCCTGAAGAATCTCCTGACTGGTCAA
GATAGCCAGTCGGATGATTTCGTTGCTTTCGCATTCAAGACAGACGCTAACAGTTACGGCAGTGTCGTCATCGGGAAGGACACACAAGGATCAACCACGTGGGATGCGATGTTTGACATTGATGGAGCGATGATGATTACTGGCGGCGGCAA
AAAGTCATGGCTCTTGTGGACAAAGTAGATTTGGCTGTTGGTTTGGTACTGTTGTAAAAGATGATAAATCAATGTATTCTCTTATAAAAAATAGGCAAGAGAATGGATGAAACCATTATATGATTTCGCATCGAAATTGATAAAGAGCGAAA
ACCAAATCGTCATGATAACCTGTATCTGCTGCAAATGAACCTTTACTTCAATAAATGTGGTAGAGTTCGGATATAATATCTGCGTCAGGTATTAATAACTTATTTTCTTCCACCAACATCTTAAGAGAAGAACAACCTATTCTTTTACTTTC
CACTCTTTCTTTCATAAACAGTATTACCATTTTTATCAGTATCATATAACATAAAATCCATGTGAACTGTATTTTTAGTTATAGAACTAACAAATTGATTAAGAGTTACTTTATCTAAATTATCTAATTTTTCAATTATTTGAGCTACAAAA
CAAACAACGAACGCGCCGGTGCATTGGCTGCAACTGCGTTGGCCTGATTCGCATCCGCCATGTTCTTGTTGGCCGAGTACAGGCTGTTCTGCGCTTCAAATGCCGCCCGCATGGACGGGTCTTGCATCATGTTGTTCAGCGTCATCTCTTTA
TTGGTTTCCTATCCATGTACGCCAAAATGGAGCTCTTGTTCGTACTTCTCGCCACTTGCCCCCCTTGTGTTTGCTCTCCTTCTTGGGGCTGCCGCCTGCCACCTGACCTTGTTGTCTCTTGTTCTACTCCTCCTTTTCTTTGTGTTTTTGCT
CCCGGCTTCTTCGCGGGCTTCGGCTCGGGCGTCTTGGCTTCCTTCGCCGCGCCTTTGACTTCGACCGTGGTCGCCGTCATGATGTACTTGATGGTGACCTTCTCGCCGACCTTCAGCTCGCCGCCCTCGACCTTGGTCTCGGCATTGCGGGC
ATTTGTAACGATATTTATTTCTGATATTTTCCTAAATCGGGCTATATATTCCATATCCAAAATAAAATTTATTAAATTTTTTACAATAAAAATTGTTCATTTCTTTATTTCATCTCTATTCATTAATTTAAGAGAGGAAAGGGAAATCATCC
GAAGAAGATAGTAAGCCAGTAGTTTCTATTCAGGATCGCATGCGTGAGCGTGCACATGATATTCTTGGCGAAATTGAGGGCATGATCGACGATTACATCTACAACAATGTAGAGTTTTCTATGTATAACTGGCTGCAGTCGAATAATATTCC
GCTTTCCGTTTTCCTTTGCCCATTTTGTATATCTTCTGCGGATAACATCACAATAAATCGGGTCTAATTCCATAATGCGACATTTTCTATTTGTTTTTTCACAAGCAATCAATGTCGTTCCACTACCGCCAAAAGGCTCTATAACATAATCA
CATGTATGTCTGGAACATAATCACGTTTTTCAAACCATTGGTGTTGCTCTCCACTACGCCAACAACCAAATACTGCGCCTTTTCCATCATCGAATACATGAACCCAACCTGACCTATCATTGCGCTTGCCGTTAGTAGAAAATCTTGTTACC
GTTTATATAATCAAATTCCCTATCCGGATAGGAACATATTAGTTAAACTATGGCGCGAAGGACAACTTCCTTACCTGCCAGAAGCTAATATGAATTTAAAATAGTGAATAGATATTAATGAGCCACTATACGATTTGTCTAACAGGGTTTCC
TACTGGTATAGTTTACAGCATAAAAGGCGCAATAAATGACGCGCGACAAAATGACGCGCTGATTATAACCTATTGTTTTTATTGAAAAAGTGATTTATTTTTTGCGATAACATCAAAATAATTTGATAATAACGTCAAAATAGTTAAAATAC
TCGATGCATACAAAGCATGGGATGCAGTGTTTGATGCTAACATGAATAAACAAATCGGTATCAAGGCATCACGACCAAACCCACTTGGTCTTCCAGATCTTATCAAACCAGAAGGTTGGGTTGCTCCATCACATAAAGGTAATCATGGAAAG
AGGGTAATTAATTCTTCAACCTTACGTGGTAGTTCTCCCTTGAAATATTTTACGACCAATTCGGCTGCTTTCCGCATACTTAACGCGCGTCTATTGTAACCCATTCCCTGCCAGACCGTGAGCAATTCATGGGTTTCCGCTCCCGCAAGAGA
TCCTTCTGGCGCGGCGAGCTGACGCCTGTCTGGCCTGTTGGTTTGCTTTTGCGTGCAGGTTTGCCGACGCGCGCTCTTTCGTCATGTCGTATGCCGGTGCGTGGCTCTTCGTCATTCCTCGCCGCCCGACACACACAAAAAGCCAACCTTGT
GTCTAAGATCCAGAGGTGTCACAATCGGCCGCCAAGAAGGCTAGAATATATAGAATGGTATTGCTCTACAAAACTTGGCGGTAGTAAAAGGCCTTGGCGGTAAAAAGCACCGGCCGTAAGTTCATGCCTAAGCCAACTAATTCATCGGCGCC
GCTAACTACTTTTTTAAGGTACTTACCATGAGTAACTCAATCTTAACGATTGACATGATCACACGCAAGGCGCTCGAAATTCTCGAGAACAACCTTGTTCTAACACGTAACGTAAACCGCCAGTATGACGATTCTTTCGCTTGTGAGGCGAC
TACAGAAACTACTGTAGTTGATTATGAAAAATTTAAGGAAATTAAATTAGCATCGCCTCTACCAGACGACCCACTTCATCTAGGATATAGAGTTTATGATGGAATGAAATTTTTGAAAATAAATTTAATCTACAATATTTTATGTGTTGTCC
GTTCTACCTTTAACCGAAACCGAAACCGTAACCGGAACAGAAACAGAGACAGTAAACAGAAACGAAGACACGGCACCGCGCAAGCGCAGTGCTGCTACCCCAAAGATTCCAACGCCGAGTGATGTTGATGAACAAGTCTGGGCCGACTTCCT
TAAATTCCATGTTACTGTCCTGGACGGAAAGCATAGTTAACTGCCACAACAAAGGCATCGATAGCCGCACCTACGAAATTACCACGTCCTAGATCAATTAGGAACCATACAACAAATGATCCAATAATAAACCAAGTGATTTGGTACTCATT
TGCTGAGGCCCAGCTGGGCCACCGCATTGGAAATCAGGCGGGGAAGATGTACGGCAGACTGAACAGAGCTGTCTACCTTACCGCCCCAGACATTCTGCACTAGCATGTCGCGATCCGCAAAGAGCTTTGACAGGAATGCCTGCGACTTCTCT
GGTTTCCATGTTTTCTCCTATGTTGGTCTTTTATTCTACATCAATCGTTGTTGCTATTTAGCCACAGTTGTAGAAATGATACATTAGGGTTTTCCTTAGAAATATAGTTTGCAAATCTCTACATTTGTAGATTAGTATCTCTACATGGACAC
GAATGGGTAGATTAGAAATTTCTTCATCTTTAACTTCAACTTCAAAGAAGTTTTCCATTCTCTCATTAAATTTTGAACCCATATTATATTTTTAAATTTCAGAAATTGATGTTGATATTGTCCAGTTTGAATTTGAATTGGCAGATTGTGGA
CATCATCGAGTCTACGGAGTCTCCAGTACACTAACGTATAAGAATCGTTATTTGCCGTGGGCCAAATCTTGATGCTCGGAACAGGCGCTTTGTCGATCTACATATATCTGTATGGGTCTACCTGTCGTGAGCTTATTGGGTAGTGTTGCGTA
AATCCAAAATTTTTATAAAAGCAACTTTAGGAGCTGATGTATGATATCTATTGTAAACGACAATTTTTAAAATATCGGTTTGGGTATTTGAAACCAAGAAGCCATCTTGAATAGTGGGTTGTTTCCAAATACAGTTTGTGATTAATTGTTCA
TTTCGAACCCCAAGTCCAGCGCACCGGCCCCGGCGAACACGGGATTCGTCATCGGTGATGACGGGGTTGCCGTCATCGACGCGTCCATGAGCGTTGACGCGAATGGAGCGTTGGGCACTGAGACGGCTCGACAAGTCCTGGCGGCCATTCGC
GCGGCCCTACCGGCGCAGGCAAGTCACTGGCACAGGTGCTGTAACAGTCGATCTATGGTGACCCGAACAAGTTGCACTTCTCTGCCAAGTTCACGCAGAACGCGGTGTTCGCCCGCTTCGGCCTGTACAATAACTTGCCGATCACGATTGAC
GGTCAACCGGAATCCTGCTGCCGTCAATATTCAAACCCCCTGTACCATGCGTCAACACATTCTCAGCCACCGTACCAATCAACGGTTTCCGTGCCACCACAACAGGCTCAAACGCCGGCTTCAACGCTGTGCCCCAACCCTGCCACTTCTGT
ACTACAACTAAGAATATAACAAATTCTAGTATTTCTGTAAAAAATTCAACAACAAATCCTGATACTTATATTAGAAATCCTACTTGGTTAAGTCTTGGTTCAGTTGATAAGACTGAACAAAAAGTCGTTGGATTATATAAGATTGACCCAAA
TGCATGAGTGGTATTACTACGAACCGCACGTAGACCGGATCATCGCGCCGCTGCTGTTTCTTTGCAGGCACAAGCGAGCGCGATACGTTAAAAAAGTCAAGCAAAACCTGAGGATTTATATCCACAGGGAAGTTTTTANCCCGAATTAAAAG
GATACCATGATTGAGATTGATTTAATAATATACTATTATAATCGTTTCTTTCGTCCATAATTAAATATTTTCTATTTTATTAAATTGTTCTTACTTCAAATCCTAACTCTTGCAGTTGCTCATGTCGATACTTTTGTCAATTCACTCAGTCT
CCTGTTGGAACAACTAAAAGATATGGTGGAGTGGTGTCATATACTATACCAAAAATATCACCACTTGTTGATGTTGGTGCCGCACCACCCCCCGTTCCAAAATTAGAAGGTGTCGTTGTAAATCCACTATATGTTTTAGCATAACCTCCATT
AGGACTACACAGCGCAGAAGAAAATAAGAAGAAGTAACCATGGAATTCCACGAGTTATCACCTGAGCACCAAGCAGGCCTTCTAAAAAAGCACCCAGATTTCCACACGGAGATGAGTGCTGGACAGCAGCATGCTGCAATTAAGCCTGACAC
AGAGAATTTGTAACTGATTGATATTGGCCTGCACCACCTCCGCCACCGCCGTATCCTCCGCCGGCACCACCTCCACCAACTACTAAATAATCTATTTGTAAACTACCAGTTGATACTAAACATTCAGTACAATCGGTGTATTGTGCATATGC
AACACTAAAATTTGGAACAAAAGTCAAAGTCACCAATTTAGCCAATAAAAAAAGTGTTATAGTAATTATTAACGATAGAGGTCCACACACTCGAAAAAGAGAAATTGATATGTCAAAACGCTCTTTTTTAGATATTTCACACAACAAAGGAC
GTTGTGGATGTCTTCAGAGTAGTCCCAGTATCTATTCTCTGTGAATTGTGTGCAGCGTTTTGCGTCTCCATTTTGAGCAAACTTTTTTATCAGCAAAACTTGATTTTTGTTGAGTGCAAGATTTGTGCAGCGTGTTTTGTCGGCCATGATAA
AATCGTTAATGTGAACTGCTTGCTTGATTATGTCAGAAAAATTAAGGGGGAGCATTACATGCATGGTTGTGGTTGTGGCTGCCATTTGACCTGATTGTTCAAAAACTAAAAAGTGTGCATCATTATCTGCTAAGTTTGTGGTAATTAATTGA
GCGCCCAGTGCGACGTCGCGGCATCGGCGGTGCCGAGCGCGGCGAGCGGGTTGGGGATGGCGCTGCCGAGGGCGGCGGCGCTGACGCTGCCACCGAACACCGCGAAGCAGCCACCGACGGCGTCGGACAACTCCACGCGCAGCGAACCGATC
CCAGCCAGTCGCTCGTGGATGCCGAGAGAACTTCGGCACTCTTCGCCTGAGCCAAAACCCATTCTCCGTGCGAGACGATTCAAGGGCCTCGGCGGCTTATGCAGAAAAGACAACTCTTCCCAGAGCTCTGGCCGGCGTCTCCCGGTCGCGTC
CAATGATTACGACTCCAGCTAGTTTTCTGCGCAGCACTATCACCAGTAACAAGCTCACCCTTGTTAACCATCTTCAGGATCTTCTTCTGGCTGAAGTTAAGCTCGTCCTTCTTGGGGGCAACAGCTCTGTGCTTAATAGGAATGTACTTGGC
AAGAAAGCAGGTGCTGCTGCGAATGTGATTGTAAAATAAAAATGCTAAATGAGATTGTTGATTATATCATGTATAGTTTGATTGGATTAGATTCAAGCCATAAAATGGGTGCAATCGCTTAATTTCTTTGTATATGACTCGATCAAGATCAT
CTGCGAAGTGATCGAAAGAGTGCTGGAAAGGGGCGAGACTGGCCTAGCCTTTGCAGCTGCCAGTTGCTGTCTAGGAGTCGCTATTGCCGCCATCCAAGACCAAAACTCCCTCTTCCAACTCCAGCTCCTGGGCATCCTGCGCACTGCTCTGC
CTGAAAAATGAGCAAGGCCATTTTGGTCATCATCTTCCTGAATTGCACCTGCGTTTACTACAAGAAAAAATTACGGACCCTTTTTTTCTAGGCTTCTGATTTTTTCTGATGTAATAAGTCATGCCATTTTCCAGCTTTCCGATTTTTACATC
ATAAAAGCGCACGACAAAGACGAATTAGGAGGTTTATGCAAAAAGTACTTTGTCCGTGTGCATGTTGATATTGACTTAAACACGACAGCAAAAGATCGTGTGGGTAAAAATTACATTCTTCCAAAATCAAGTGAAATCGAAAACAAAAATAC
TGCAGCAGCAAATGCTAAACCAGCAGCGACAGTATCAACAAGACCAAGAATATAATCAGATGATGGATAGGATAAATAGGGATGATGCGGATAGGCGAAAAAATGGATGGTGATTAATTTAATTTTAAAAGCCCAGATTAACTGGGCTTTTT
TCACTCGAGAGACGGACGGGTGTGTCCTGTTATAAACAGCCATGTGATGGTCCAAAGCTTCTTCAAACCCTGCTTGATCGTTGCAGATAGCCAGTTGTAGCTCTTTCGTGCCCACTATAGAACCAAGGAAGGCCGATGCTGCAATATCTTCC
CAAACAACGAACGCGCCGGTGCATTGGCTGCAACTGCGTTGGCCTGATTCGCATCCGCCATGTTCTTGTTGGCCGAGTACAGGCTGTTCTGCGCTTCAAATGCCGCCCGCATGGACGGGTCTTGCATCATGTTGTTCAGCGTCATCTCTTTA
GATGTATTGGATAACTTATTATTAAAATTAAGCGGTAATGGAAAATGATTATTCAATTTTGTTAGAATCAGATTGGAATAAAGGTAATGATTCAACAATGAAAGCAATGGATAGAGTTTATATGAATCAGTTGTTCTTAGAGCGTTTGCATA
GAACCAGGAATATAAAAGCTTTGTGGAAATAGATAAAACTTATTTTGATTGAAAGCAATAATTTTAATTTTAAATCTTTATTTAAATAATTACTTATTTCCTAACTAATCTACCACTAAGTCCAACCCAATTTAATAAATAATTTTTACACC
CCTACACCAGATGTCGTGTCAAACGTGCGCGGCTGGAGAATCAAAACCATGTTCTCCATGTCAGCATCTTCGCACACGGCTTTCATTAGTTCGGTTGCGTAACCTTGTTTGCGATGCTCTTTAGCAGTACACACAGCACGGACTTCGCGCAC
TCTAAAGATTCTCTAATACTCTTTAAAAAACTATCAAATTAATATTTACTCCTTGCTTATAAACTAATTTGACAAGACGCAGTAAAAATGATTCTAAAATTATTAAAATTATAAATGTACGAATCTTTCATTTTTTTACAACGATAAAAAAA
GCGGTGCTATACTAACATCATAAACAAGAGGAGCAGGCTATGAAGGTATTCGTCCTTACAGGAGTTTGGGCTTATGAAGGCTCAGAAGTGCTCGGCGTGTATACAGACATCGAGCAGGCGAAGTATTATGCTGCGGAAGTCGCTCGTGAGAA
ACGCTTCGTTCCGCCATGCGTAAATACCTGCAGCGCGACGAGGAAAAGGTGATCAGCGGAGTGGCTACCCGTGCTTGATTTCACGGAAGAAGAGCTCGAAGCCCTGATTCAGGTAGCGCCGAAAGACGAGAAGATGGCTCTGCTCAACACGA
GAAACACCTGGTCTGAATGGTATGTGTTTTTGTTTAAAGTTTGTATCGTTTGTTCCTGCGTGTGGTATAACAACAGGAACTTGTTTGAATGTTTGTGCTAACTCCAAATCTTGACCAAAACGGTCAGACTCAGGCATATAGATATTAAAGAC
AAACTTGATCTCGCCACCCGAATGACCCGGACGCTTGGAGTCCATGATCGGCTCACTCACGTGCGGCTTACCCGCAGAACCCTTACCCGGCTGTGCCATGTTCTTCCCTTCCCTGTTAAACCGGCAGACGCCGGGAAACGTTTGCTTGCAGA
TTCTTTGTATTCTTTCCACTCTAACCATAAACTTTCATATTCAGATGAAAAAAAAAGTACAGTTCTTTATTTGTATTATTATATGTATTATTATATGTTAGATTATATGGTATAGGTCTTTCATTTCTGAAAGATGCATTTTTCTATTTTTG
AGTTTACAGATGAATTAATTAGTAAACTATTACAGTTCAACGCAATGTATCTGCATTTCAGTATAGATAGTTTTGGTAAAATTATGAATACATACGCTATCCGATGACCTGGAAGGCATTAGACGCCAGTGTATTAAATTTATTAGATAAAA
CATGGCGTTAATTTTTTTGGAGTATGAAATTGATACCGCTAACACAGGGAAGGTTCGCAATGGTTGATGATGATGATTTTGAAGAACTTTCGAAATTCAAATGGCAGGCCCGTAAGGTAGGGTTGAATTATTACGCTATCCGATGCATTAGA
GCCGAGGAGAACGCGCTCCAACTCAAGAATCAGGCGATGAGCACCGGGATGCAAGGCACCAACGCCGGAGCCGCCGGAGCACTCCAAGCAAAATATCTCCCCAGTGCGTGGGAGAAGGGTACCGCAATCGCGTTCGGCGTCGGATCGGAAGC
AAAAGGCACAATTCTGAATTATATGACAGCCTATATAATCAGCCCATGAGAAATTGTATTGAAACTTTCTCGCTGATTCTTCGGTTATTTCAATAAATTTACAGTAAATATCTGGGAGATTAAACGTAAAATATACGTCTCGTACTAAATCA
CACGGTGATCAAGTTACATATGAACTGGCTACGAACAACGCCAGCAAACGGCGAACAACAACTGGACGAACTCAGTTTCCTAGGATCAGAATGCACTAAGGACTGTTCCAAGGTACATCGTTGCTGGATATGACTGGTCAAAACGAAAAGGC
CTATATGCCTGACTATACTGTTGATTTGCAGCGCATTGGTGTCGAAGTTTTGTATGCTCCATATGTGCGATCAGTAAAGGAGCATGTTCAAAAGTGTGGCAATAGATATGATCTAGTTTTTTTATTCAGGCCAGTAGTTGTTGAGCGTCATC
CCGATAAGCAGCTTGTGGTCCGGCGTCATCGTGACACCAAACAATTCAGTCACAGCCTTGACGCCCGAAAACGAACAACCGCTGTGGCTCACGAACTCAACCCCGTCGAATACACGGTCACTGGGGGTAACGTCTATGATCTTAACCCATCC
GAAGAAATTATCAGAAAGTCTGAAAGAAAATAGCAGTAAATAAAGATTATAAAAAATGTTACTGCTGCGGAAGCTTATGACATTTATATCGGAAATGTAAGAAACTTTTGCAGAAAAAACTGAACTATTGGATTCAAGAAAAGAGAAGAATC
GATGTGTACGGGTTTGATAGAAATGTTGAAGTAACTAACTACGAAGGCATCTTTAGCGAACTAACACAGGGCAATATTACACTAAGACGTAATAATGAAACCTACGAAGGTTTCGACGGTGCAACATTTAAGAAGGTCCTGTACGGTGAAGA
GACCGGGCCAAACTCCAGAAGAGGCGGCACCAGTACCCGAGGTGTACCAATTCCTGAAATCAACCGGACACAGCACCATGGCTATTTCACAAGTCGTCCTTCCATTTGTGAACAAAAAACAAAGATACCAGCTGGCGTATTTCATTGGGCAA
CAACGCTACAAGACCAATAGGACCTGTTAAAAGCGTCATTGCACCCGATAACGCACCAACCCCCGCAATCATGGAAGGAAGAGCCGTTAAAAACCCTCCTACTACAACCAACAGCGGACCGGCAGCGGCGGCTAACCCTGCGACTACTATAA
[truncated: 9,582 more rows]

## Sheet: sequence length 201-250
GCCATAGAAAATGTTGGTGTTAGTGCCTGCGGGGTTAATCAGAAAAGTCTGAGTAGCGCCAGCGTAAGGCATTCCATCAACGCGGTTTACGGGTTTTAAGCCGTAAGGGGTTGCGGTAGTAGCCATTTAAGGTCTCCTTGATTAAGAACCATTGCCAAAGGATGCGCCTCGCGACACACCCGATTTTTTCTCAGAGAACAC
[truncated: 19,298 more rows]

[truncated: 3 more sheets: sequence length 251-300, sequence length 301-350, sequence length 401+]
