# Supplementary material for: 454-Pyrosequencing: A Molecular Battiscope for Freshwater Viral Ecology
Source: Genes (Basel). 2010 Jul 21;1(2):210–26. doi: 10.3390/genes1020210 (PMC3954088; doi:10.3390/genes1020210)
Supplement: Supplementary File 3 — Supplementary Table 2 (XLSX, 360 KB) [file genes-01-00210-s003.xlsx]

## Sheet: Membrane Transport 
Subsystem Hierarchy 1	Subsystem Hierarchy 2	Sequences
Membrane Transport	ABC Transporters	gagtcgtgctccaaaaatgatgcgcgaaaacatatcacggctgttgccatcaattcccatcaagtgttgaggttgatctgccgggcagcccaacaaatgaatacaggcggtgtcgcgtcgcttgacatctttcagcggcacaatggggtcaaaaggagcaatttgttcagcaaaaactgcacagatgatcaggatcaacagcagaaacatacctaactgagcagagcggtg
		tgagttcattccgccaacgggcaggaagggcgctccggtaaatggattcttgatggtgacataaaagatgacgatcagcccaagacccagccaatagacaggaatggattgaccgatgaatgtgatggtagtcatcgagtagtcaaacgccgaataaggtttgcgtgccgaccagatcccaatgggaatagcgagtagaagcgtgaacaaaaatgaaacgccgaccagtaa
		cctgtctcaggaggtcctcgaggtgatgatcggtctggccgaggacggcatgaccatgatggtggtgacgcacgagatgggattcgcgcggcaggtcgccgaccgcgtcgtcttcatggagtccggccacatcgtcgagatcaacccgccgggcgcgttcttcacggccccccgccaggatcgcacgcgacgcttcc
		cgcagtgagtgcttcgactatgcccagcaggattccacccagcattgccccggcgaggttgccgattccgcccagcacggcggccgagaacgctttcatgcccagcagcgagcccatgctgtagtgggcgacgccgtaataggtgccgaccatcacgccggcgaccgcgcccagggctgctccgacgatgaaagtgaaagcgatcacgcggtctatgtctatgcccatcaggcccgcg
		aggttctaatcagggagaacgacaacaccaggccgcatacaataaccacaaccaacaggggcatcatcgaccaggatacggcgctcaggctgccgaaggtccatacaataaacaccttgagcgtatcggggttgcttacattctgaaacacactggtcagtgcaccacctatgtaaccaaacatca
		ccaagaactacacgcgcggctgcaacggccgcaaggaggcgctgaactccgacgccatccaggcggcgaagctcggcaacagggcctgcgcctcgtgcccgatggcatgcggcaagttcacgcgggtaaactccgccgagatcgaaggtcccgagtacgagacgctctgcctggccggctcgaactgcgaggtcaacgatctcgaggcggtgatccgcttcaaccgcctctgtgacgacctcggactcg
		ggcggcagaacgatggggagcgcgacgatcgcttcaatcacaaatttccagcgccagcgggaaaacgtgacccagtacgcgat
		tcgcaagatctacgggctggaccagcctttcatcagccagtacctttcctgggcctggaacgctctccacggcgacttgtccaagtcattgctgtcgggtgagccggtcagcgtctcgattgcgcgttgtcttcccaatacggtcttgatcgtcgtattggcgatgttcttttctttcgctatcggggcgcccttgggtgtttgggctgcaagcc
		ggagtgattccttgtggcccgttggtcaggttgagtggtttatccaggttgttggccagcacgcggatcacttcgccgaaacccagggtcacgatggccaggtagtcgccacgcagacgcatgacgggcaagccaatcaggataccggtcagcgcagccgcaataacagccagcatgaggaataggtaaaacgtatctcctggaaggaggaaaaggcagattcgcaggctgtgtgccaggggcgtaaggcat
		gagatcatcgctgaaccactgcgtacttatcatccgaaaatgtcacgccaggaagttcgcgagcgcgtgaaggcgatgatgctgaaagtcgggttattgcctaacctgattaaccgctatccgcatgagttctctggtgggcagtgccagcgtatcgggattgcgcgtgctcttattcttgaaccgaagctgattatctgtgatgagccggtgtcggcgctggacgtgtcaatt
		gcgttgtacgcttcgccgttgttcccaagcatcatcgacgcggcgtctcccggcaggatccgcgtcatgccgaagatgagcgacccggcgaggaacagcgtcgggatgatcagcaacagccggctggcgaggtacttcgacatcgctcagtccgtgccgccgcaagccgggcgaggtgtgctgctccggagggagcagcacacacgcgcggctgtcacgcgtccttccagacgtacttca
		cctggaattcgagtcggccatggggcagtactacctggtgctggccttcctgatcctgggcgcctacgtcatgcaccgcatcgtgcattcgctgctgggccgcagtttcgtggccgtgcgcaacagcgaggccctggccgaagcgctgggcatcccgctggcacgcaccaagcgcatggccttcgtgctgtcggtgatctatgccggtctggccggtggt
		ggcggcatggctgggccgtcaatgtagtccattgccgaaagctggtagaagtggagaatgtgtgaatcgaggaaattggcagccagaactaggtttcgcatgagcgtggcgttaggcggcggctcgacaccggctgcctgctgcaatgccaaaacggacgccatactgtgaggcactgggcacacaccgcacattcgctgcgtaatatgctgcgcgtccca
		cgttgcagtatccagttaatcacaaaggaaataaagatgagtatgatacccaatgccagcgctctatcataatttccctttccggtttccagtacgatcgcggtagtcattactctggttttgtattgtatattaccccccacaagcattatcgcgccgacttcggagatggcccgtccata
		caagctcttcccatcgcggatcgcttaaagtttgaaaccagggcgattgctaggaccacaaagacgaaaatcaaaggaatcgaactgagacgatcgatattattgatgcccgctgcaccattggtgattttcatattcaagatgacgattcggatgatttcccgcccccaatgtcgcaatggccagatagtcgccttttaaccgcaagacggtaatccgacaagcaacgcgacgatcgatgtgatgatcg
		accgccgatgagcggtgccagcaggggaaacgccagcagcaaccccaacaagggcagcgacagcagcggcgccagccggtggtccagcaggctgggacacggccgccggcgcggaggagcgagacgctgcctcagccatgggacgggaacagcccctggggcttgaagaacagcacggccgccatcagcacatagatcaggatggaggccaccgccgggccggcgttgctggccgcctccgggcccag
		tggcaaattaccttacggcttgcaaaaacgtgttgaactagcacgcgcacttgctgctgagccatcactacttctactcgatgagccgatggcaggcatgaacgttgaagaaagcaagacatgtgccgcttcatattagaagtcaatcagcaatacggcgtaaccacc
		cggcgagagtaccgccacccgcttaagcaccagtccgaacggtatgcgggtggcaataatgacgaatgccggaaatgccgcgaatgacagcgcgcggactacatcgtacttgtcaaccgacaccagcagcacgacaaatgctccccacacgaagagcaggctgcggtgatcgaaatgcgagagcacgcttgcagacgctgccgggcatgcaacatcggtaaaaccggtggaacttacccgtcataccg
		tgcagatgtgcgtacgcatccagaggtcatcagagcctatctcggacaaggggctgcatgatgagtgccttgcttaatgtaaaagatctcaaggtctcctatggtggcattaacgctgtcaaagggatagatttacatgtcaatcaaggtgagcttgttgccttgattggggcaaatggtgctggcaagagttctagcatgaaagccattgctggtttg
		gtttttccgtgaaatacttcccaatgccctgactccggtggtgacgcttttccccttcgcgctcattgggggaatctccagcttgacttcgcttg
		gagggttcgtctaaaagcatgactcgcgggcgcagcatcaacgcgcggccgacagccagcatttgctgttcgccaccactcaggctaccagctttttgggttcttctttcacgcagtctcgggaataagtcatacatttttttccagatcgagggagatttccgctttgtcttttctcctgaaggcaccaacacgcagattttcctcgacagtgagatcggtaaaggtt
		cgtgcgcctgctggtagaagagctggcttgccagtgccacgccagtgttgacgatgccaaggccggcgacgatcttgtcgcggctgatcagatcctgggccacctgcgcgccgcgttcgggtcgggcctcgtcgtcccgttcgatcaggcgcagcggccgtccgagaatgccgccggccgcgttgatttcctgggcggcgagccggatgccgtcccgcatcgacagccccatcgggctcgacccg
		gacgacatcggccgctgcatcctgtcgcgcctgctgcacggcgcccggctgtcgctggccatcggcggcgcggcggtgctgatggcgatgatccccggcatcgcgctggggctggtggcagccttcttcccgcgcttgatcggcaccgcgatcctgcggctgatggacgtgatgctggccctgcccagcctgctgctggccatcgcggtggtggcggtg
		gagccgcgtcatcgaactcctgcggctggtgggcttgaacgaggggcacgcgaaccgctttccgcacgaattttccgggggccagcggcagcggatcggcatagcg
		ccgctacgaagtggacgagctattgaacgcgcagttagaacgtgagactttggtacatcgcgagtaaagtcagccacataatcatcaactggattagcgataagttcttcagctgtgcccatctgtacaacggcaccatcacgcataatcgcaatgcggtcaccaacttttagagcttcatctaagtcgtgagtaatgaaaatcattgtcttaccaagatcgcgctgtaagcgaataa
		agttctcgatcttgccgtccttgatcttgatccagtggcccagcatgccgcgcggtgcggcgaccgtgcccacgcccttggcctctttcggccaggtggacgggtcccacttctcggcgttgacggtgctggtgtcgccggccttgatgttgccgatgagctgcttgaagtcgtccatcatcatctcggcggcgtactggctctccagcgcacgggccagggtgcggccgatggtggtgggcag
		gccaggtcgtgggatataaacagacatgcgaacttcaatttttcctgcaggtcaaccagtagctctaagaagcgagcctgaacagaaacatccagtgcgctggttggttcatctgcaatgagcaggtcgggtctaagtgaaattgcccgggcaattccaacgcgctgtcgttgaccaccggagagctcgtgcgggtagcggttgcggtagcttctcggcagctcaac
		catgttcatgagcgatgacggttttgactcctccgacgccaccaagatcgccggccaggccctgctcgatggtaccggtacctactattccacggtgtccggtccggcctcgatctatccgggcacagcaaagttcattcaggattttaaggcgaaatataacgccgatccgcagcctttcgccgctcagggctacgattgcatggccatctgcctgaa
		gtcagcgtcggacacagccgccgatcgtcaggcacccagccgatgccggagcgtgcgatctcgtgggtcgggctgcgggtaacctcgcggccatcgaagcggatggcgccgcggcgcggccgcgtcagcccgaggatcgagcgaagcatcgtggtcttgccggcgccattggggccgagcagcgcaaacaccgtggcgcgctccaccgccaacgaggcgccgaacagcgcctgggtttcgccgtaataggt
		tgcctcaaaatgtggagccttgaagtaatcagtccagagaacccagaggtgctccttaacttggtgtgaacgttcttctttgattgcaacagaacgtgagcggaaatctgcatctgggttagctgcatacttttccatgcatgccttaactgagagcgcttcgatctttgcctgagctggatcgtaaacaccgcatggcagatcgcagtgtgcgtggacagttacctttggtgtgaag
		cgtcaccatcatggcaccagccaggccaatcacagcggatcccaggacaaacacctgcaagtgcctgcgcttgacgtccttgcccatggcttcggctgcggtctcattgtcacggatggcgcgcatcatccggccccaaggagacttgagcgctgcctggcaaagccaaaacaggatggccagcaccagcagtgacaggccgagatacgacagcttgaccacaa
		tgctggacgtcgcggtagcgggccttgctgccggtatagaccgcatcgagtccgagccagtcgaaagggcgccagaacgccgtgaattcatagccctctcgccgtgcgccggccttgggttcgacggcgttcgagtcgccgacgaaaaccagttacgctgctcatgttgagccaccagtaggccgccgtgaatttcgaagctgccgatctcgatgcgtccgcctgcttcgtagccggtacccagtaccag
		gccaggtcgtgggatataaacagacatgcgaacttcaatttttcctgcaggtcaaccagtagctctaagaagcgagcctgaacagaaacatccagtgcgctggttggttcatctgcaatgagcaggtcgggtctaagtgaaattgcccgggcaattccaacgcgctgtcgttgaccaccggagagctcgtgcgggtagcggttgcggtagcttctcggcagctcaacagaatccagcaggtcctc
		cgcgccggtcagtagaccgttcgcaatcacaagcacattttcgggtgcaaaaggttcagtatgcgcaggaagttcgtttagtaaaatataccccgccaacgccttgccgccagggtagagatgataaaaatcctcgctcagggtttctacttccaacgcgccagtggtgagattgacccgtaaaatttttgcagtgcttccataagccataa
		cgaggcagtagttaatgtaacttgctctgaggcgggtatggccttatcaaagatggctcaaggggctgacttccagaagcgctacaaagagcgctttaactcagatgtacaaatctatgcgcctttcacttatgacgccgtctatgttttagtagactctatgaagcgttcaaattcaaccgatcccgcaaagattttggctgcaatgccagatacaaaaatgcaaggcttggttggtaatattgcttttg
		gtcggcgcggatctcggccggtgggccggtggcgatcacgcggccgaagtccaagacgtgcaccgtgtcgcagacgcccatgatgagcgacatgtcgtggtcgacgacgaggacggtggtgcccgcggcgggaagccggcggagcaggtcggcgagctcagcggtctcggtcgggtcgagccctgctgcgggctcatcgagca
		gggccgaagtaggccacctcgatccgaccgaacgcatggcttcgatcatcgacgagtagtcggtcgtgacggtgatctcgatgtccttgcgcagcgtctgctccaggtggcgtttgagcggctgggcgttctggatgatgctggcggcgttctcgtc
		cgttcctggcgagtgccgatgttgtgaatatgcaatccttccatcacagattcgccgatcggtacacgcgggtcaagcgaggcgtacgggtcttgaaaaatgatctgcatgtggcggcgcacatccttaagctcattgccgcgcagtttcaaaacatccttgttatcataa
		cactggccggcagccccaggctttcgaacagcgaacgggcccgatcgtaaatatccttttggtgatgaaaaagtacgtgcgcctgaatgacatcttcgatgaagttgataatcttacgcgtcgggttaagggcattcatagcggcctgggggatgtaggcgatctcggtgcccaggatggtcttgcgcacctcatctgcctgcatggccgtaaccttatggccgtcgatgatgatatcaccgctggtg
	Lipoprotein Sorting	tcctccacctgctgggtgggactcgacgtgcccgactcgggacgtaactttccgtctgtcggtcctggacccgcgcaacgagtcgtcaccggctgaagctgcggcgcgcccacctgggcttcgtcttccagctgcacaacctcattcccgacctgacggtgggcgaaaatctccgcgtgcccgcg
		tgtctgaaaggaaagtctctggcaacttttcgtaacaaaaatatcggattcgtatttcagttccaccagttactacccgaatttactgctctcgaaaatgtct
		tgagctggtcgggtgtgcgcgtacgaataacgaggacgttgcgcgagctatgtctgcaccagccaccgacacgcgaccgttcgcactcttcgagtggatgctggcgctgcgctacctgcgcgcgcggcgcaaggaaggcttcgtctcggtgatcgccggcttctccttcctcggcatcctgctcggggtggcgacgctcatcatcgtcatggccgtcatgaacggcttccgcaccg
		aacgagccgagcagcacacccgccgacgaaatgtaggtgataaaggaaatgaatccgagtttgcgttttccgcggaggtaccgaagtgcgatgaataattccatttaatagctgctctcaatgtttcgggggagaggtctctcccccgggccgagcttccggccgaaaaaccggccggcgatctcggcc
	Membrane Transport	aggagaagatcaaggggacccggacggcgccttcgtagaagcggcagcccttgtgagtcagggcatggtcacccagcatttccccgtggtcggcggtgaaaatcaccagggtgcgttcgcgttgcccggttttttccaggtgatcgagcaggcggccgacgttttcgtcaatcagctcgatcatgccgtaataggaagccttgttgtgctggtggc
		cggcgcccgccggtccgatgattgcgtgggcagcgtgttgaaggcgctgaaggatgcgggcatcgagaacgacacggttttgttcttcctctcggacaacggcatcccggtgccgtttgcgaaggagaattgttatctcatgagcacgaagaacgggctgatcgtccgctggccgggacacgtgaagccggggagcgtcgatgaccgccattatctgacgagcgtcaacttt
		ctccgacgtggacgtctgcatcttcacccacgtgggcgacaacttcgacgtgtcgtggggcgcgcaggatgggacggggctcatctcggcgcagttcgatttcctgggcgaggcttcgcacgccgccggcgcgccgtggcggggcggagcgcgctcgatgcggttgagctcatggacatcggctggaacttccgccgcgagcacctgcgccagcagacccgggtccactacgtcattcgcgacggcggcg
		gacatactcccaggtgacccctggcggaaaggctttttccatgctgcggcggatatcttccatcatatcagcggggatgctgtcgttgagttgtttggcaaacgcgtgatcttcctcagagaattctaacgccccgaccttcttcaaattctcgagcatgttcaagtggatggcatggttgcccagcagttcgtagcagccggtcaggaaatcgatctcgtaggtagtctgggtcatcagcgccg
		ggtgatctttggcggcgtgggtgcggggctctacggcatgctcatgtatgcggtgcttgcggtcttcatcgcggggctgatggtcgggagaactcccgagtaccttggcaagaagatcgagaagttcgaagtgcaaatggccatgttggccatgc
		cgtcactatcgtaaactttcttcatcacagctcctatggttttgacttacatattagtatctggttatggattaccgtattgtttgccaattttgctgagagcctggctgagggtaaaggtagagatcaagcagattcgcttaagcaaggacgtagtgagatttatgcgcagagaataactcctggtacggatgagaagtttgaaagggagtagcattagttgatgagtcagctat
		acctttccttctgcgtatttaatacgggtctccaccgctttaccgacaatgacgacggtgaaggcaaacaccccaatccgtcccattaacatcaataaaattatattcagtttcccgacaacactaaaattggtcactgtagctgagcaccccgccatttcccgtcgagattcctaccgttccgaacgccgaacaggtttcaaacagtgtgcgtacaaaagagagccgttcgctctc
		ggtctgattgacatgggaaaccagatgctccaaaatgccacactcggagggggtcaatcgaatgtcgccgctggccccccggatgtggtgcgcttccaggtcgatcaggccctctccgaagaagaaacgccgcaggcgggtcttctgagagcggattcggcgcaacgaggcgcgaattcgggcgcgcagctccgcgacgaccagcggcttggccagatacgcgttcacgccgcattccaggaccgcgatgcg
		cggcggcgcgggcgatgatgcggggcacctcgagctgatggaggagggcggtggtcaggatgctgtcctggatgtggccggcgccgatggcgcagacggcggtctccatggtgtcgatcttcatctcgcgcagggccgcttcgtcggtggtatccaggaccacggcctggtcgacgaagtccttgatggcctcgacggcctcggggtcggtgtcgatggccagcacggtatgcccgcgccgggcca
		gcattgaaaaaaccgacctccatttgttcctaattgtttgatagcaatttgcgaagccactggccccataggaattatctgctgcgcaccctgaagtgtttgagcagtttcgtagtttttaaaattctgaaccacaccttgtcctgccaaaacaactgcaaacaaaattgaaagtggcaaaagtacataaatggttgtacgagtgatatctgtccaaaaaattacctagtttatcggtggttttccg
		ttcgagaacccgaacggcttcaccaacctgctcgagatcgccttcctgctcgtcatcccgttcgcacttacgtacaccttcggccggatggcgaaggaccagaagcagggctgggtcgtgttcggggcgatgttcgcgctgtggctcggatcggtggcgctcgcagtcggcatggagacagccggcaaccccggagctggcgaagggtggcgtcgccca
		ggaggggtcggctccgggctgtacgggatgctcgtgttcgccctggtcacggtgttcctggccgggctgatggtcggccgcacccccgagtacctgggcaaaaagatctgggcgttcgagatcaagatggcctccctggtcatcatcctgccgtgtgcctcggtgctgatcggcacggccctc
		caatcagttttatgaccaataccaattggcaggcatattcaggcgaaactacaatgtcgtatcttacgcagatgctggggctcaccgtacag
		agagtccaagcaccgtcaccagcaacatctcgttgctgcgaaaacgggacacgtaggccagcaaacgcgggacggccagcaacccaaacaccagcgccacgaccaggaagatcgcaagacgcccgcccgtattgatcacatctccaatcgtcagactcccggtcatcgcaatgcccgagagcagcgcgatcagcacgattccgagaatatcctcgacgatcagaattccaaaaatcagctccg
		gcttgcgtccccgtgttcatggcaacacccacgtcagcttgtgccagcgctggggcgtcgttcgtgccatcgcccgtcatggcaaccaggtgaccctcggcttgctcctgacggatccgttttagtttttgttccggcgttgcttgcgccatgaaatcgtcgacgcctgcttcagctgcgatcgccgcggctgtgagcggattatcaccggtgatcatcacggtttttgattcccatctttcgc
		gagtgatgtctccaaagcccactgtggtcatcgtggtgatcgcccagtaaacccccaccggaatgcttg
		tgcaaagttagttcatcttctggcaaaatatttcttgaacgagtggggctgcaaaaatcaaggtacttcttaaaagcgaccacttggtcatctgtacctattacatacagtgtatcttcaggatatatacgttcctgcctgtctggtgcctgtatggtaaatgctcctcgctttatcatagctacgtttacacc
		gactctgcggcgcgcccggagttggtcgctgccattgacgatgaagcggatcatttgaatatgctggttgggaatttgcttgacatgtcgcgcattgaatcaggtgtgctgaaaccaaaacgcgagtggaatattttgccggagatcgttggtagtgttctgtcacgcatgaagcatttggcaggggagcatcgtattgaagtggatgtgccggagagtctgccgcttgtg
		tgcaaagttagttcatcttctggcaaaatatttcttgaacgagtgggggctgcaaaaatcaaggtacttcttaaaagcgaccacttggtcatctgtacctattacatacagtgtatcttcaggatatatacgttcctgcctgtctggtgcctgtatggtaaatgctcctcgctttatcatagctacgtttacacc
		cgtttcgccgcggcgggcgtggacatggccgccgctgacgctcaagccggcggcaacatggaagggaaggaagttcgcttcggcatcgccaactcgtcgctcttcgcgacgatcacgacggcggcatcctgcggggcggtcaactccatgcatgacagcttcacgccgctgggcggactcgtgccgctggccaacatcctgctcggtgaaatcatcatcggcggcgttggatcgggtctctacgg
		ggtgatctttggcggcgtgggtgcggggctctacggcatgctcatgtatgcggtgcttgcggtcttcatcgcggggctgatggtcgggagaactcccgagtaccttggcaagaagatcgagaagttcgaagtgcaaatggccatgttggccatgc
		ttggtcgcgcaaaagacgatgaaaagcgtcgcttacttaagtggaccaagcttgacgtatcggtggcaatgggaattgccggcgttgccaacattggtattttgcttgtgggtgcggtcaccgtttctggagatgttgaagacgtgactatcgataccgcggtcgcacacatatcggaattccacggtcagatttttggaacgatgtttgcga
		cttaggaaccgccatcatcgccgcgctgggcattggcgctatcagcaaacaggctgagatcaaagaagacacagcgatcggcatcatctttgcgggaatgttcgcgcttggcattgcgctgatctccactgtccgcagttatgcggtggacttgagtcactttttgtttggcgatgtgctgggcgtatccacacaaagtctgtggctgatcatcatctttgg
		gcatacttatcaccggtctggttatgataatgatgttgctgatagaatatgtaaacatccattctcatggctcctatttcaggaaactgcagagctctccggtgagacaggtaatactggctactcttttggggcttgttccgggatgcgtgggcggttttgccgttgtttcgctctttacgcacaatttacttagtttcggatccctggtggcaatgatgatatcctcgtcgggagacgaggcgtt
		agcacgttgacgagaaacgtctccacgagccggtgtttccgcagcacgttgagcgccacgcggcggccgtccccggtgagtcgcacgccctggcgcgggtggtgctcgaccaggccttcatcggccagcgccttgatcattgtggtcaccgtgcccgggac
		cgggcgtggataaggattttgaacaagctcctcaatttttctggctctttaccattattatcgttatcagctccgccctgattctgattcccaacgccccgctgctgaccatcatgttcatctcgcaggtcgtcaacggtgtcgtactcccttttgtgctgatcttcatgctgaaactgatcaacgaccataatctgatggggcgctacatcaacggtccaatattcaacaccatcg
		cgggtgcatcaggcgataggggagtggaatggaagcactactcactcctaaagaagtggcgaagtttctgaacgtgtcccaagccaccgtgagagaactggccaagcgcggagaaatccccagcattcgcttgggcgtgctgtttcgcttttcacgggtagctctcatgcgttattttgacgaggctgggcaaggacatggacaggagatcaacacatgtcaaaagacagcaacggcctttacaagaggtcgg
		tgggcaggaagatgcctgccgcatcgtcctgccacacctcgccggccaccaccacgcgcgcctcacgcgcccgctccaggccggccacgcaacgcaacacgctggtcttgccggagccggaggcgccgaacaacacggtgatgccgcttgccggcaaat
		catggctttccatgtcatggctttccatgtcatggctttccatgtcatgacattccatatcatgacattccatatcatgacattccatatcatgacattccatatcatgacattccatatcatgacattcgatttcatgacattccatatcatgacattccatatcatgacattccatatcatgacatt
		accgccgtaagcacaaatagaattatattaattcgttttgtctttatgcccattgtcctcgccagttcttcatcgaaagtaacggcaagaagatcatcatagaaaatgatgacagtagttgcgactgtgatgaaaacaataatagagagaataagctcggtt
		ccccaagcaccgagcagagcagagctatcagtgttccggccagcagggcccgttgaataaagccgtatgaaaggatttcgaaaagattcatggtcagtggcgatggcacatcagatgctgggagtgttcgccgaacattggaagacatctccggtgaacagcagaattcgtcaaaactgccgtagaaaaggntttttttgcaaggtagagcatcttggatgcatgttctccgattgcacc
		agcaggaagaagaacaccagcccggccagcagcgtcaggaacagctcgtgcgcgccggcctggctctcgaaggcctcgggcagcaggtgcaggaaggcggtggccatgagcgcgccggccgccaagctcagcatgtgctgggtgaaacgcgccagcacgccaaagctcagggctgcggccagccacacgctgccgatgccggccgccagcgtgccgatcaggatcg
		ggtttcaaacgcgacgggaatttcaatattgaaggcgacagaattgctggtgaaaatcgtaatcgcgtatgcttcgccatacgaccacggataatcaaaaatgattacggcgcgcccaagccgttgaatggttgcgctgggctctacgtgaaacggcatcacagccgcgttgatgatgatatttgctattgtgatttcttcagggcttgtcttaaatgtggtaatgcattgtgttatgttcatgatggg
		catggccatgatcgtgatggtcatgaccgtgatcgtgatcatggctgtggtcgtgattgggatcgtgggcgtggccgtgcagaaaacacgggtccaactccagcgcgcggttgaggtcgaacgcgcctttgtcgaggatcttgtccagcgcgatgtcgcagcgggcggtgtggtgaatctgggcgaaggggttgagggcgcgcacgcgcgcttcgatggctttcaaagcttcgg
		aaaggaactttatgaactactaagagaattggaataaaagaaaatggcaattattatggtttcgcacgatattggaacaataacatcctatgtaaaaaccattgcctgtgttaatcgtaatctgcatcatcaccgatctaacaggataacacccgaacaactagcagcttacgattgtccaatccaaataattacacacgggtaaa
		tggcgttcagtcgtccggctgacaaaccgattgtctgcgcccattcttcgtcaaagacaacgcaaaacaatttgcgatagaacaaacaataggatacgactacaacgcatcctaggagaaggatgagccacaagtccgatgggcgtaccgtgaggatgctcccaaagagcaggctctccaggctcaccaccgggcc
	Sugar Phosphotransferase Systems (PTS)	agcgcaacccgcgtcatccgccagcagtttccacaggtacaagtcatcgcattgacaagttttaaagagggcgagctgatcaagaaggcattggaagccggagccattggctatctgcttaaagatgtttcggccgatgagttggccagggccatccgtgctgcgcactctggccgcgccacactctcgcccgaggccgcgcaagccctggttgagacagccaatcaaccacaggcacccgg
	Uni-, Sym-, Anti-porters	ggcgcgatgtacgaaggtttaggcgcgacgacttcaaacattttagtcggtttaatttcagcgattgttgataacattcctgtgatgtttgctgtacttaacatgggcgttgatatggatttatatcaatggttgcttgtaacgttaacagcaggtgttggtggttcattgttatcagttggttcagcggctggcgttgcgttaatgggcgcgtcaaatcgcaaatataccttctttagccatttgaaatgga
		ggcgattggattgctttcagccatcgttgataatgttccgctggtggctgctgttcagggaatgtttccactatctctttacccgactgatcactttttctgggaattccttgcctatgctaccggaacaggagggagcatcctgatcatcggctcagcagcaggagtggctgccatgggcatggaacgaatgacattcttctggtttttaaaacgaatcacgttgcttgcactatccggat
		taatgggctgacagtgggtttgttaatgggggcaattgtcctagccgtggggaaaaatcaacccaaatttgtggctctcgcctgtgttaacgttgtcattggtgcgaatgcgggcggcactatgagcccgttaggcggtatttccacgttgtttgtttggcaaaaaaacattcttcactttactgagtttttttcgttgaccattccgtgcctaa
		gattaacaagacctcaaagaaaacgaataggttaaataagtcgccggttaagaacgccccattgatacccatcaattgaaactgaaataaggcatgaaagtatttgccgcgctggtcccnagccctgcatcgcataaaacagtgcagcaatcgccactatcgaggttagcaataccatcagtccagcaaacgatccagaactagcacgatgccaaatggcgcggcccaatcacctaatacataagtctgaatt
		ggaccggtacgcgtccggcctccggtgtgccggagagatagccggcggcataaatgaagaccaggctgccgacaccgaagatgagcagcagcatctgcgccgccagtccatcgacgtggaacgcaagatcaacccccgccgaaggcacccacgaccagtgaaggctccacggcagcggaacgctggccagggcaatcgacaacgccacgaatagcgtcacaggcagcgcggcccaggcgagcagggg
		actggcaccacaacccggcggcacgcgacggcgcgcgcatggcccttatcctcacttcggcaggtgggctgtgcctgcttggtggcgtgctgctgctcggccgcatcgcgggcagctacgacctcgacgccgtgctgcaggccggtgaccggattcgcgcacactcgctctacctgccggcgctgctgctggtcgctggtggcgcgctgaccaagtccgcgcagtttccttt
		ctgaccgtacagttgtgtgtgttgctgaaactcgaccccgtgccgctggtgattgccgaggtctgcgcggccaatacgggcggcgcggcaacgctggtaggcgacccgcccaatgtcattttgggtacggtgctgggtttcaatttctcagattttgccctgaacaccgggccgctggcgattgccgcggcggtgct

## Sheet: Respiration 
Subsystem Hierarchy 1	Subsystem Hierarchy 2	Sequences
Respiration	ATP Synthases	cttgttgtacttctgttataagtttttcgccattggcgcgttctatttcaagagcgtctaaaaggtttggtaattgtgattcgtcatcaaaggcgacgtcaatcacaggaccgattatctgtacgatacgaccgtatttttcttcactcatgactgtttaattgtatctgtgttattgtctaaatcagatttagaacctaaattatcaatgtttttc
		gcggtcgcttcctggaaggtgccgcgcgtcagcctgaactgatcccgatgctgcgcacccagttcttcatcgtgatgggtctggtcgacgccttgccggtcatcgcgatcgccatgggtctgtacctgatgttcgctgcctaaacatgcatccggctccggccgggtcgaggatactcgcctgtcatcctgactaggtctgaggcaaaggcacgaggcaacgctatgaacatcaa
		cggcctggtggtcgacgaagtaacaacgaaacttcgcgatatgatacagcttgtttcgacaaatcgtcaaaaaataatcagagcatgccgtccagtatctcggaaaaattctccgatcgtggttccagcataaggtgcataaaactgcaaagctgctgggtcggcagcagatgccgcaacaatggtagtatattccattgcgccatatttttcgagggtatgctgaatatttgcaaccgttgaattctt
		gacgcgtccgcgccgatgtgacgtcctccgaggagctggcccccgcgacgctggatcgcgtccgccgctcgctggagcagcgcacgggcaagaaggtgatcgtcaccgccaaggtcgaccgcgacctgatcggcggcgtcgtcgcgcgcgtcggtgacctggt
		accgatgatgtctttaccaaggtcgttgcgcacatatgcgtatacagattcgccagcgaattgaagctttgaaggaacaatcgcggccttgcgtgaagccattacaaaaaagattgaaagaattacaactgacagaagcgctaagaaaatcggctttgttgtgtaagggttatcgccaaaaattggtggtaaaacg
		cctcactttctgaggtcaatttagaacttaataagaaccttgctgacgctcatacagattaccaacgagcgattgccgatgctcaatctgcaagtatggagcgcttggcacaggctaaagagcgcatggacgaaagtattgcgaacgctcttgagacattgactcgatctcgcgctgacgcgaagaagcaattggacgaaggattggctgaggctcaaaagactctcgccgag
		taatggctggtgtttttgaaatcacccatggattaaatgctgtgctcgacgatcctgttttaagtaaagagaataaaaagaaaataattcttacttctgcaggaatgaatgtctgtgcgacaactgaacggttcatcgattttatcctgacgaaaaaaagagaaacttttttgcggtcgatatcactcaggtacattgattttataca
		ggtcaaaattgacagaacttttaaaacaaagccaattttcaccattaactatagagcaacaagttttcgttttgtttgccggagtaaaaggttatcttgataaaattgatatcaaaagaataaattcttttgaacgtgctttattaacagatatgtctcaaaatcaactagagatgttaaatactataaaaacgaaaaaatctataagtcctgaatttgaaaaaga
		tctccgatgtgctgttgacattcgagaatcaaaatactggttattttccctattaacttcaagcgcttcaaaaatatcaggtaattcatttccttcaaaactaacatcaacaacaggacctattacctggattattttgccaattgactgagacatattttatctttttattattaaaccaatagtttttatcactaatattatcaatcattaaatcaaatgattgtaa
		gccgggatatgcttcgcggcctggtgggcggcggagtaacaaggaaatttgacgataggcaacggcttgcttagttaagtcgtcatacacaatcaaagcatcttcaccacgatcgcggaaatattcacccatggtgcaaccagcatatgcagagaggtattgcattgcggcggattccgatgcgctagcagcaactactacggtgtattccattgcgccgagct
		ggcggcggtttacatcgcggccgccacgcgggtccgtaagccgaagccggaaccggcaataagcaggtgagggaccggttaagacagaacaaggagatatgatatggataacatgagcattatagcggtggcctcgatcgtcatcgcaggcattaccaccggcttcggcactatggggccggcgctggcggaaggaagggcggtagctacggcgctgacc
		ccttcactagttgactgaatttctcatggtaatggattattgccttaagcatcatgtactgctttttggttcgcaatatgaatcgacttcatgataagcgtgctgctgtaagaaatcttccctgatcttccttgttgtctttaggacaagcttgtcttcctcaggaagagcatctgggcctactagttgtacctattttccct
		gcaaggaatgatgctggcataagccaacatctaaccggggttcgccccagaagtagaggaaccagatggcagacctaaagatcagcccagacgagattcgaagcgccctcaaggacttcgtcaactcctatgagagcgacaaggcctctcgcactgaagtcggtcacgtaatcgatgccggtgacggtatcgctcacgtcgagggacttccaagtgcgatggctaacgaactgctgaagttcgccgatgg
		caatcattgtttcagctggcgcttccgaatctgcagctttgtcatatatcgcaccatatacaggagtctctattgctgaatattttatggaac
		ttggcggcttccagcttggccagcagcgcagcgtgcttgtccttgaggtagccgtgcaggccgtgctcgaagggcagcaccttcttcacttcgacgtcgtccaggaaacccttgttgaccgcgaacagcgaggcggccatcaagctgatgggcagtgggctgtactgcggctgcttcagcagttcggtcacgcgggcaccgcggtccagctgcttgcgggtggcttcgtccaggtcggaagcg
		aggcgacggcgtgtttggagagatcgtcatagacgatgagtgcgtccatgccgttgtccatgaaccactcgcccatcgccgcaccggagaacggcgcaagatattggttggtcgcggtgtcggacgcgggagcagagacgatgatcgtgtaaggcagcgcgccggcggcttcgagaacggcgagcgagcgggcgatgttcgagtttttctgcccgacgccgacgtagatggaatacagcggg
		attccttctgaaaccggctatcaatcgacgatgaattccgaacttggagaaattcaggagcggattgtctcaactcctcgcggttcaattacgtcagtccaagctgtgtatgtgcctgcggacgatttttccgatcctgcaattcaggctattttctcccatctagactcagtggtggtgttggaccggaagattgcccaacaaaaaaatttatccggctatggatccattggtatccagttcaagctt
		tcaggcgtacgggcaagatcgtccaggttcccgttggtgaggcgctcaaaggccgcgtggtcaatgcgctgggcgctccgatcgatggccgcgggccgatcacaacggaccgttatcgtcccatggaattcaacgcgcctgatgttgtttcacgtcagccgatcaatactccattgcagaccggcatcaaggcgatcgatgctatgatcccgatcgggcgcggtcagcgtgagcttattatcgg
		agaagatcgccgcgttgctgcgcacctttcgtcatgcgttgtcagagtacaagcatccgttcctcgagaagcgtgaccagattaaaaaggtacggcatcattctcgtgacttcggataaaggtctctgcggcggcttgaacaccaacgttctgcgtcaactcgtgaataaaatgcgcgagcttgacggtcagaaggttgatgttcaggtcacagcgattggtagcaaaggcttcgctttcctccagcg
		gcgatgggcgcggcgatcgccgcggtcgcggcggcgatcggcatcggccggatctcggcggcggcgtgcgagtcgatcgcgcgtcagcccgaggcggcgggcgacatcaagggcaacacgatcctcacggcggcgttcatcgagggcgtctgcctcttcgcctgcgtcattgcgctgctcgtcaacggcaacgtgttgaaggcgatcgaagct
	Electron Accepting Reactions	cccgcattttttcaatcacccgaatggaatccaccaacaagcaaagcgttgactataaactcctcggcagggtcgttgctcaagcaaagccgtacaacggcacgctggcagcagcggcggtattggccgtggtgctagcgcccatcgccatcctgcgaccctggctggtgcaggagatggtggacaagcacatcttccacggcgatattccgggcctgacccgcatggcgctcatctttgtcggggtg
		atcaccgtttccatgccggacggcatgacggccaaatcctgttcgagcacggacaggtgaatggcctgttgaagggccgccgggtccgcaggcaggccgagcaggatgttctcctggagcgtgccgctgaacagccagggcacctgggcgatgtaggcggtgcgcggcgggatgaagaaggaagccgggtcgtccacgggcgc
		tggcgtcgcccagaccctggtggttgatcagccagccgagcggcccgccgatccagccggcccacggatagtgcggcgcgatgcggtccttccacctcatagcagcctcacagtagcctcggggcccagtaaatcagcgcatagatcggcagccagctgaccaccacgaaatcccagtagccggcgttgtcctccacatcggcgaagcgctcctcg
		tgccgcgttcctgcaagccagcgcgtgggcggggcgggggaaggatttaaggtcgcgatgcgcacgctggacgtgtttcgaacgtctgtggcggccgcgtctctgggatttgcccgtcgcgctatggatgaggcgctttaccgcgccaccacccgcaagatgttcaacggtgtgctggcagattttcaattgacccaggccaagctcgcgcagatg
		cgccggtgatgacggcgaggagcatggcgatctgcacgtagatctggaacttgttgtcgtcgtgcccgtggtggtcgtgggcgacggtggcggtggaggcgctcatggtgggtaatcagaggtattcgagcaggtagacggccgtgaagatcacgatccagacgatgtcgacgaagtgccagtagaggcccatcgactcgacatccacggctgggcct
		caccgtggtcgccccggaggctgtccccctgggccgcctcctcggcgaccgcgtcgggaactttctcaaggcaaaacacgaggccgcgggcgtcaccttccggctcggcacgaccgtcggccggatcgcgggtccacccggcgccaagctgctggtgctctccggagggacagagcttacggcggatttcgatatgga
		gccgcacattctttgaataaactattatcagtagcacttgctacaagaactttggcacttgccgaaaaacaggaatttgaagaagttcttatcccttgtgccgcttgttataatagattattgactgcttatcatgaattacagcatgataaaatta
		gatcgcgtagacgagagtgaatccgatcaaagagatccacacctctgtcgttgtcacgagcggcgacactgcatcagctgtgagttgctcaccgaaacaatccatggctgacgacccatttcggtgaagatccaaccgaaggacgcggccaacaagggtccgaagatggatgaaataactcgagcgctggaatagccggttcttctgcggtgtctgagacacgcaacagggggataggaaggc
		gtgctaatttttttgcttgatgaatcgtgtctaaaccgtttgaatctggcaaagacaaatcaagcagcgcgatatgaaaagttgaatgttttaagacttcttttgcttgcagaatggattcgacccacgttacttcaaaattcacgtctgttgcttgacgcaggctgagacacgcaacaggggaggcaaggcacacaggggatagg
		acgccgtgtagcaaggcgcacctgttcgccatcggcacaacccagcgcttgggcgtcggctgcatgcatgcgcaatgatccgtaccgcccctttaaatgccaatcggtgctgcgcaccgtggtgttactggtatcactgcggcgctcccccgctgcaagaataaacggaaactccgggtcatgcggcggcaattcctggcttagcttgtgcagctcaggcattaattcgggaatgtgcaaa
		atggagtagaacggggtgaagtaccacacgggtgcaatgtgcagcggcgtggtcagcgggtcagcgggaatgaagttgttgtattcaaggaaatag
		ccaaaggcagataacaccatagccatagtttgcggacctcctattatgatcaaatttacacttcctgttttacaaaaacttggctttaaggacgaaaacataattaccacactcgaaaccgaatgaaatgcggacttggcaaatgtggcaggtgtaatgttggcaatgtatacgtttgtaaggacggacctgttttttaactatgaa
		acctgcacttctggacctacgccaaccaggccaagcgcaacggcgccaagctcatcgccatcgacccccgccgcaccgaaaccgccgacaagtgccaccagcacctggccctgcgcccgggcagcgacggcgccttggcgctggcgctgatgcacgaattgatcgtcaacgactggctggacctggactacatcgagcgcgcggtcgagggcttcgacggcctgcgcgccaaggcgctggaatgg
		ccgcaagccgccagccagtacatggaaagcatccatggccgcgccttgatcaagctcgggctcatcgtggccccctcctgcaacgactgccacggcgttcacacgatccgccgcagtgtggatcgcaactcctccatcaaccacgcccatgtggccgacacctgcggcaaatgccatgtcggggtcgaggctacctacatgaagagcgttcatggccagctgctggccaaggg
		ctactccatcctcaagcaccgcaagtcgctcggccacaagccggctgctttccatgagtcggtggcggtcgaggtggcctggaccgtcatccccttcatcatcgtgatcctgatggcgctgcccgctaccaaggcggtggtggcccagaaagacaccagcaatgccgacctgaccatc
		gagttatgtgcgactcaccggagttcggtttgattcgcgtcggcaaccgtgcgaacatgcagagcgctgggatcgagatcggagtgagcgaggacgccgctttgaatgacctcgaggtgagaggcaagactgccgtgtgtgtatctcgcaatcaccgcatcgtgggcgtgctcggcatcgcagacagtgtgaagccagacgccgcggacgccattatcgct
		cagaccatgttcatcgatccaagacaacgaacagggataaatcttacaagcctgttcattttgttccgatgcattccagacatgtcaagagccggataagcgtcattttcacagacaaagacaacgattcgtaacttttcttcatcatcatcagggacttcaatagattttaccatcgatccaatgagatcgatgctgtaatcagcgaagttaataattctttcaggacaggcaccc
		ttgacctgcgtcttcagcggacaatcggcgtcctcgcgccagtcagggatcagcctgtcgagcgagaccggatcgatcacggcgcccgacaggatatgcgcgccgacctcggaacccttctccaccacgacgatgctgagatcggcattgagctgc
		gaaggcagcgaacatccctgcgccggcaacgatcagccagacctcgttgccgtcccagaacgggccgatcgagcgc
		cctgtgttccggctcctgccccaccaacttccactccggctgggatcatccgcccccaggagatcttcatgctgatccgcgccggcaagcgcgaggaagtgctgaacgccaacggcatgtacatgtgcacgtcctgctacaactgctacgtgcgctgcccgcgcaaggtgccggtgacccacgtcatgcacggcatcgccgagtacgccctgagacacgcaacaggggtaggcaagg
		gctatcacgccagtttatgacgacgagtgataacggtttgtcgtcttactcttttttaattgttaatgaggtataaagtatgtctgctgtaacagctgaacacgcgcacgatgatcatcacgatgatcacgcgcatggtcctgaaaagggctggttgcgttggatagttaccaccaaccataaagatattggtacgttatatttgctatttgcgct
		ccatgggcaccgtgctgcgccacggctcgcccgagcagaaggccaagtacctgcccaagatcgccagcggtgaactgcgccttcaagcgtttggcgtgaccgagccgaccaccggcaccgacaccacccgcctgaagacccgcgccgtgcgcgacggcgaccactacgtgatccacggccagaaggtctggacatcgcgtgccatgttctctgacctgatgctgctgctggcgcgcacg
		gtgcgccatgacgagatcgtgaagctggcggaagacaaatgcgcgggcctgaacacaggtgacgttcccgcttgcacgccatcgcattatgcgggcggcgattttcgcgccgtcgaggatctggaacaggcacatgtcgcctatgcctttcccggactgtccaattccgatcccgattatttcatcgcgcagatatatgccacggcgctgggcggcggcacctcttcgcgcctgttccagg
		gcatagtttgtattaaaaagttaagctgtatcggaaaaataagaatatgctaatatttatttttctaaccgtgcctgatgccagatttatgccatcagcataccgggggttttatgatttcagaaactgttgttgagttatcacgctggcaattcgcaactaccgcactctaccacttcctgtttgtccctttaacgttggggctgtcattttta
		ttgccatcagaactggaagtaagaacgatccggccgataatacgggattgtcgcattacctggagcacatgatgttcaaggggactactcatttcggtaccagcgattattccagggaagcaccattgcttcggaaaattgaagagttgtttgaggtttaccgaagtacttccgacactttgaagagaacagctatttatcaccagattgacagtttatcgggaatagcagccagttatgcaatagcc
		agcgatggcgccctggcgctggcactgctgcacgtcatcaaccgggaagcgctgcttgaccgggagtttatagccgccaatgtgctcggatttgaagagttggcggcagagattctgccggcgtgctctccggagcggatggcggaggtctgtggaatccccgccgttgtcattgaacggatggcgcgcacgtacgccggagcagcggcgccgtttatccgcttgggaagcggcctgacccgttacgg
		gccatctcgaggcagcgcctcccgatgccgacgttgaaggcggcgatcttcaggcgcccatgcgtcagctgctcgtcggcgacgatgaatccacgatcgacctcgccgagaatgtcctcttccgatacctcgacatcgtcgaacgacagggtgtagggttccca
		ggccactacccggcgtcggtgctgcgccagctggccgcgctgggggccatgagcgcacacctggacacgccggccggcccgggcagctacgcgctggcgatccaggccatggccgaggtgtcgcgcgtgtgcggcgccaccggcttcatgatgtggtgccaggcggtgtgcggcctgtacctgcagcagtcgggcaacccggcgctgatgggcgagctgctggcggaccacag
		gtagtaaccgcctgcgcagtagttaatacacccgtgaccaaatagggctgacgaccaatttctgttacgtaccagcccgataagactgcaacccacccagagaaagtcattagcaccaagactttagctgtccattgtggcaaggtacgagtaccccgcatctgccaacgcgctagccaagaaaccaacagcatgagtacaccgacacccaccatcactcgaaaagcaaaaaatact
		gttgacgaaagttttggctccgcttttgcagcgcagccttatcctttaaattcggctcaaacttttcacaaggaatgctgccacaatcaaagccggtctctgaacctaccgctttcaaaggtaacactgtcagcaacgcaacgatcagcacacccagcaatgtacccttgataccaaaatccaccattcat
		tacttcaatctctgtaacaacctgtccttgtgaattgaggatttttaggtcgtctaagcccgttgcttttacttgaacattcatattattttcagaagcattcatgatctgaatacgataaatgttctcgatacgcactccatccacttcacgagccaatgccccacgatctcgcatcac
		tatgcaagatcaccacgcccacaatgacaaaaggcattaagtaatgcagcacgaaaaaacggtttagcgttgggtt
		ggtcatcagggtcttgggatcggcgacgatgaagccacggttgttctcaactgcgctgccgtccaggatcgtcagatcggtgccctggccggtagccagaatcacctggtcagcggccagggtcaacaagcggttctcgtcgaaaactgggttgaagcgaccgctatcatctttcgttcgctcgcagtactgcaaggtgacctcgccatcctcgtcgatactgaccggaccccagcctgcgtacagttccacg
		gcgcggtcacggggtcgatgtcgggaatcgagcagcgcgtgcagggcttgaccggcagcagctgcacgggcgcgtcggcctgcacgcggatcacgcccaggctgtcttcctcgtgggccgccaggcctgccagcacgatgttggggcgaaagcgctccatccccaccggcgcgtggccggccaccgcgagccgcgcgttgagcgcctcgagcgaggcctcgctggccaccagcaggggaaagccg
		tgtaagaaatacaagccgagcagtcgagtgtggggaaggttttgtcgagctgagccatacgtccgccgatggtgggcgacttttcaacaatgtcaacttcaaaacctgcgtcagcaacgtcgattgctgtctgaatgcctgcaataccgccgccgataacgagcgcgcgttttgttacagggcttgtgcctgctgtgagcggagcgttcatatgtactttcgcaatcgctgcacgtgcaagta
		gcggggccagcaggcgctcggcggccatcggcgaaagcacgttgggcagcgcgcccaggccgtactgcttcttggcggtcatgggcgtggtttcatagccggtagccaggatcacggctttggcttttatctccaacggggcgggttcctgcaggaagtctatgca
		gttggcggccgtgcagcacgcctcgctctcggacctcgtggccgctcttcccgagggcctcgagtcgccggtcggcgagcgcggcaccagcctgtcgggcggccgagcgccagcgcgtcgcgatcgcccgcgccttcctgaaggacgcgccgatcctggtgctcgacgaggcgacctcgcatctcgacgcggtgaacgagcaggccgtccgtcgcgccctcgacctgctgcaatccgaccgcacgacga
		taaatgaattttttagtaccttatgattggaagtcacatatacttttatactatataaatttatctacctcatcaataaatagaaatatataaaaataatcatactacatcaacgaaatgtcagtatcaagctgctgcttcgaacccaaagtgatgatttttagaaaaatgaaattgtacatgac
		atatttgttccatatacaggatgacgttccctgtttcattcacctcgacacgcagtttcttcaacggcgtatttgaaggtccgcgagtaaccagtcctttgctgtcatatttcgagccgtgacatgggcattcgtactcttcgtccttgtgctccaccgtgcagccaagatgagtacataccaaactcaatgccatgaaaccatcatcattgcgaatcaa
		cattgaccaaaatataccccttctcttcaaatatgagtaaaaacacaaaataatcgtcctaggaacacaatcaacctttatacctaaacctggaacagctcaagaatgagtaatatcctcagaagtggacattaatcttatacaaactcttgaaggtaatacaatcgaactagtagatctaaataaacgtaaataatcacgtgaattcaaaaaattttgaccaaactttaaatta
		gtgctagaacgcgaccgtctggccaaatcacccgcttggacgttccatcacgggaacaccgcgcggcctggatcggcttaaacgtctgcaactggttggctatctcgaccagaattactgcgcatcaaatactgtactggtcgtggcagggaacatccggcatgccaca
		taatagtgatagtcatgaacaaggtccgggccttgctgtcaatacctaccaagtacatgtggtgtccccacacgacgaaagacatgcaagcaatcgagtgcatggcgtaaaccatgtgcatcttgctgctaatgggcttgcgcgtgtagtaaggaatcagggtactagccacgccaaagcctgggatgactaggatgtagacctcgggatgaccaaaaaaccagaagat
		cgcagcgcctgcacttcggccggcgtcagcgggtcggcatacgcattgccgaagctggatcgcaggtagtttgccaccgccgcaatctgtgcgtcgctgagcatgctgccgaaggcgggcatcgccccctggccattgaccatcatcatcgcgggataggccttcgcagccagccggacgttttcagcgagtgccggatagatggccgggctcagcttgccgccttgccg
		aagcaagcctaaggacacagaacatggctgatttccacgaaatttctcccaacgcctcggttggcgctaaggcgctcaactggatagacaatcggttcccgttgtcggcgctgttcaaagcgcatatgagcgagtactacgcgcccaagaacttcaacgtctggtacgtctttggggtgttgtcc
		tgcagtgaaagaccctggtcttgaaccgcaccgcgttcgcatgactgacaagagcgttaagcacgagaaggctgcggtaaaccaggtttctgcaatgttctttgcatcacttgttggtagcgtatttgcaatttgggcttactttgcattcccaattaccgaagatttga
		cccgcattttttcaatcacccgaatggaatccaccaacaagcaaagcgttgactataaactcctcggcagggtcgttgctcaagcaaagccgtacaacggcacgctggcagcagcggcggtattggccgtggtgctagcgcccatcgccatcctgcgaccctggctggtgcaggagatggtggacaagcacatcttccacggcgatattccgggcctgacccgcatggcgctcatctttgtcggggtg
	Electron Donating Reactions	cctggcgcggtcgttcaacgacatgacgggagagctgcggcgcacgcgcggggcgctgcacgcgctcgcggaggatctggagcggcagatggacgagcgcacgatggcgctgcggcaggcgcaggactcgctcgtccagtcggagaaaatggtgtcgctcgggaagctcgcggcctccatcgcccacgagatcaacaacccgctcgcgggc
		ccgtgatcatccccgtcagcggttacgggctgtggtccacgatgcacggttacatggctttggaacacgatggtcaaacggtgatcggtttgaacctgttcgaccaagcggaaacccccggcttaggtggcgaagtggtcaaccccaagtggaaagccttgtggaagggcaaaaaaggtc
		ggcctctattactacttgcgcgtggtcaaggtcatgtacttcgacgagccggccgacgacacgccgctcgcgctgccgccggatcgcgcgttccgctgggcgctctcggtcaatggcatcgcgcttctggtgctcggagtcgcctggggcccgctgctggact
		gcaataacaataattgagcagacaagatacacagaatactcgccctgtgctcttccatatgttataggaagggaaatttatgttcctgaaaaaatattcatctacaaaccagaagattacagcaataataacataaatcttatgacgagaactcttgttcagagcatagatacaaaagaaaaaattgtgaagattcttgaggaagacaggattgtagaattaaattatgatttttttaataatggcaacagg
		gagcttcatggttccgttggctgaacttaccgtcagaaggtcattttccgagaatttcagtgccgctgcgtcaatccgggacagctcgacatacccgttcgggacagacgtacatcggcccttcaccatactgtgaaagcgtaccgttatgatacagagcgctgccggttaccagcgccagcttgcccgattcggccttgcacgtcgcggcctgaggcacaacaaagcaggtttgatgtcaaccggtgc
		aaggttttccccacccgttcccatactgttgcggcccagggtggcatcggcgcctcgttgggcaacatgtccgaggacaactggcactaccacttctacgacaccatcaagggctctgactggctgggtgaccaggatgccatcgagttcatgtgccgcgaagccccgaaggtcgtctacgagctcgagcacttcggcatgccgttcgaccgcaacccggacggcacc
		gggccatgcgacagaccaagtagacgcccgcggtcaccatagtggctgcgtggatcaacgcgctaaccggtgttggaccagccatggcatcgggcagccaaacgtacagcgggatttgcgcgctcttgcccgcgcaaccaatgaagacgaagatgccaatgagtgacgcggcgctcacgtatc
		tatagaccgcgtcgacccggcaataagcggtcgggatgtcgtaggagccggtgcagatggaaaacagcccggctggcagcttggtcgccgatacatgcgaattgaacgcgccgtgatcggccagcgcggtaaagcgcaggccggtgatgcggccgtccttggttgccgcaagctcgccgatgccgtgatagtcgcgcgcgaaaccggtggtggaaatattttcgatgcgcgactcgatccatttgatcgg
		ccgtcaagcggacgttttgatggtgatgggaaccatctctaagaaaatggcaccggttgtaaaacaggtatatctccaaatggctgagccacgttgggtattatcggtaggggcttgtgcttgttcttggcggtatttttgatacgtattctgtactgcaaggaatttga
		attgccgggctcaataatcataatcggcccctgctcacaaaaaccatgacaacctgtaacgcataacctgacgcttct
		taagattttagattgaaaaccagtaacaattaatatatataatgtatgaaagaaaaaattgtaaatattgttaaatcgtgcgggaataatcctggtcgcttaatgaacattttgttagccactcaatctgaattcaattgtgtttcagatgaagcggtaactattattgctgcagagttaggtatgtcagaggttgatattaaacaaactaaatcattttatcattttttcacttgtaccccaac
		gtataggttaagcacatttcagtttttgcaagtcctttagatacggcaatggcaaagtcgcgacacgaatcgtaaccacaggcgttgcaacccaaat
		actcaatcttgaagtaatgcaatcaatcgttgcccgctatccgcgtaagcgttctgccatcatgccactgcttcactatgtgcaatcagtttttggttatgtcaccaacgatggcattgagattatcgccaagttgattgaaatcgaagctgctgaagtcactgccgtatctactttctacactcaatataagcagactccaacaggggaatatcacattggagtttg
		caagattgccccgccaccgcgtgaaggcatgaagtccaacatggaagagctgattcaccatttcaagctatttactgaaggaatccatgttccgccgggcgaggcctatgcagcgatcgagcatcccaagggtgagttcggcatctacttcatttccgacggtgccaacaagccctaccgcatgaaga
		cgtgccgatcaatgtgtggttgcgccagggaatgagaaaaaaatgacggccggccggtgtcatggacccgacagtataattaccggaaagcaggcgtttggacgttatgatatgaatgccttctgaccggcgcagtgttgtcgtcccgctgccgttggttttggccataccgagaacgatatccgcccacggtccgccgcagttga
		tataaagctctttacatgcgtcttccactgctttcatttgcaactgcataaattacccaatcaatttgctaaatacaaaaataaaaggccacaagcaatgccaaacaaaatagccacctgagtccaagccttacgcagtccgcgccacggaccaaactcaatcatgatgagccgaatcccacccaccaaatgaatcgccaacaaaataacgagcgcccactcaccaaattt
		cttttggtctggcttagctgtgctgtggaaatgattcacgccggtacatcgcgttacgaccttgaccgtttcggtatggtgttccgtcctagcccgcgtcagtctgatctgatgattgtggctggcacactgaccaacaaaatggcaccggcactgcgtaaggtatacgaccagatggctgagccgcgctgggtagtctcaatgggctcatgtgctaatggtggttggttactaccattattcct
		ctcgcgggtattgttcgatgtcagcaccacaaagggtttgtgctttgcggagagtgtccccaactcgggcacggatacttgaaagtcgctcaacacttcgagcagaaaagcttcaaactccgcatccgcgcggtcgatttcgtcgatcaacaaaact
		ggtgcgatctctcgcagcgtgattgcgccgaccggtccccccgttgccgcgtcgaccaaaacacaaaagtcagcctgctcgagctcagctattaggtccacagtcagcagttgacgcgacaacacgcgcacccgtggatcggtgaggctcgatcgcaaacgctctgcgacagctggaccaaacccgtcatcgctgcgcaatgtgttgccatagccgatcactacgacccgcgggcactc
		ggaggctggctgccgccggtcgagttcctgtcctttattccgggctggatctggctgggtctcaagacctttgtggtggtgtccatgttcatctggatccgcgccaccttcccgcgcttccgctacgaccagatcatgcgtctgggctggaagatcttcatcccggtcacgatcgtctggttgctgctggtcgctggcctgatgcagacctcctggaacatctggaaataagtaagaggaggag
		gccaacccaggcgacaacattcaatgcatcgggagcacccaatgaatatacagggaacaaacgggcaaccaggtatacaccggcaacaaccatagtcgcagcatgaatcaaagccgaaacaggcgttgggccttccatggcatcgggtaaccagatgtgcagcgggaacatggccgatttaccggcacctcccatgaaaatgaaaattagcgaccaggtaagtaccgacatgcctaaaaatgctg
		ccgacgaagtcctggcgcatctgggccgtgccgcaggcggcgatacagcagccacactcgatacagcgatccaattcgtagatttgctcagccagttcgggcgccatgggggcctcgacggcatccaggtccggttcgccctggaggtggatccaggtctccagccgctcgctcagggcgcgcatcc
		gccgtacttcattggcggcgaaatcaagcagcgcgaggcgctcgctgtgcaaaccccgcagaccctcaaggccatgcttgccttggaggtgcgcaccagcaccgaggcggtgacgattgatcgccccggcaagcgggtgcagttgcgcaacctggccgccgggaccgtcgagtggctggcctacgacaaactcgtcctgtcgcccggcgcggtgcctctgc
		ccgtactcgcgcgcctgctcaattgcgcggttgaggcgccgcactgcaagtggatactccgcgcgaacgtagatg
		ccgatatttcccgcttcatcacgcggtgaaccgttccacgtcgtcggcacaacgcattgataattttcgattttcgtatctttaatcaccagccaatgacccaacgcgccacgcggtgcttcggtaaaaccaacgcctttaacgtgactgtcccaagtatcggtttgccatttcgtgacgtttgcggtggctaaatcgcccgctttgatatttgtgaccaatttgtccatgaaataacgcattttccccgccg
		cacggtttcagcgcggctgccttgttcatgctggccggtggcatacagcaccgcatccatacgcgtgacatggaccagatggg
		aggcagacaggtggctcttctgcctcgccccggtcatggcggcgatcccggctatcatgatctgtgccgtgctccccttcggcgcccgctcaccatcctgggacagcaggttccgctgcagatagctgacgtcaacgtggggattctgttcttcatggccctttcgtccatagccgtgtacggggtagccctcggagggtgggcctcgaattccaagtacgccctgctgggcagcgtcagggggctggcccag
		ggtgctgctcttcttcggctcaaacgacgccgaagacatgacgtttcgcgatgagctttcggcgatggccgaacgcatgccgaacctcacactcgtgccggtactcgtgcaggcgcccggctcctatacaggtgagcgaggcttcataaccgcggcgatactgacgcgctacctgcccccgcactctaccggcgctttcagtacttcatctg
		catgatgtcggcctggcgcggcgacccgcggaacacctcggagccaaagcgggcaatgtcgaatcgaggcgtgcctgtgcccatcatctcgatcgcgcagcacgcgagcccgaaggtcgctggccacagcgagcccgcgcgggcccagccggcgaagtcttcgagcttgccgacgatgaaggggggtntgggggtctcgttcacgtcagcttcactcccactcgaatccgccgcggcgccattca
		agcgcatcgaggcccgacggatgcggctgggcgtgcatcgccacttcgcgcacggtgcccgaggtcggggcatggacggcggcagatatccagccatcggcctcgccgatcaactggcccttcaataccttgtcgctggccgcgaccaccggccgcggcatgccgccgatgctctggtgcagcggcacaacgagatgcgacggcagcggcgccttggcaatcggcaggccggtcg
		tggatatgcgcgctctagatcatcggcaacctgatcaaagtatccaccgaatggacgctctgtagaaccaggcgttgcagttgagcgaacaagtccgccgtaacctgaagtatcgccggtgccgctagcgccgaacattccctgttgagtatcgctcattatgcgtgcgtctcttctagcgggaaattgccaagttggatcgtagggcgagcatttaacgctgctttttcgactt
		gctcaagttcggcgaactcgccatcgcgggcgaactcggctatctcttcgccagcggtgtgatgagcatcctcttctgggttgagattctcatcggcgttgtcctcccgatgatctggttctccatcaaaaagaatcgcaccagccccaacggcctgctcattggcgcaatcatcaccttgctcggcttgatcctcaatcgcttcaacgtcagttggttcgcggtccagcatccag
		cttacccatcgctccaatgaacaaacagatacaggcgactgcgagtaacggccagtccgcattcggaatcaacgaaatcgtctgagtcgagagtgtcggcgcagcctgaaagacctgggcatagtccagtgaccccgcgtgggctgcaatgaggccgatacctaagatgaatccgaaatcaccaacgcgattaacaagaaacgccttcagattcgcatagatcgctgtcggtcgggtgtaccagaaaccga
		gtcgcgatgttctcgatgatcacgctcgtctcgaccctcgtgcatatcttttccatcggctacatgtccgaggacaagcgcttcccgcgcttcttcacctatctcggcctgttttgcttttcgatgctgggcctcgtgctcggcgggaccgttctccagctttttcatcttctgggaactcgtcggcctgtgcagctacctgctcatcggcttctggtacgagaagaaatccgcatccaacgccg
		cttgtccggcttgcagcatgcgccgcatcagcatcacgcccttgaggatggctactggccgctcgcgcatcagcacgtcgtcgcaagtgatgaacggctcgcattcggcgccgttgatcaccagcgtgtcgagcttgccacgcttgcccggattgatcttgagatggctggggaaaactgcgccgcccagcccgaccacgcccatgtcgcgcaggtagtcgcggg
		cgtcgtcaatgtcgaagtcgacggcaaggcctgccagggcaagaaaggccagatgatcattcacgtcacggacgcgcagaaggacgcgtacgtgccgcgcttctgctatcacgacaaactacccatcgcggccaattgccgcatgtgcctcgtcgaggtggaaaaggcgccgaagcctttgcccgcctgcgccacgccgattgccgaaggcatgaagatcttcacgaagagcccgcgggccatc
		gcttcagcaacttctggatctgcttccgccactgtctttccggcatcgcgtgacattactgcgatagtttcagtagttgctttctgcattacctcagcagctctaaagagaattgcagtgcgctcttcgattgttaaaccgctccacttgtcctgagctttcttagcagtttcaattgcggtatctacatctttagcggagccaactgagtagtgataccaaactttgccgttatccgaagga
		cgtcttgttaaacagtagcgaacaggcgctgagcgatcagcaaaatcaacagttaacgcaatcattttgcgatgtggtggatgctattattgctggtggtgggatggttggtggtctgggcgatcgttttacgcgtgtggcggcagctcatgccgtgcataacggtctgaccgtgctgccgcaaaccgagaagtttctccacggcacc
		ccattccggtaatggcgccaggcttcaccggccgtggtggctttgtcctggcctgggaattgcgccttcggctggatcagcaccgcattctccttgcccggcagactggagtagttcggcgtgccttccttcacgatgcgccaggtcggcgcc
		catgtttttccaggtgcgatttgatgcgcagaccaaactcccgatccatgacgctcatcagctggggggccaactcgaccacggtcaccttaaggccgcgggcatggaaggcctcggccatctccagtccgataaagcctccgccggctacgatggcagtcttgggctgctgctcggcaa
		ggtcatccatttagaaaagatttcccaatctctggcaacgttgaaatgcgttatgacccagagttaaagcgtgtggtgtatcagcccgtcacgattgaagcgcgtgaaatcacgccacgtatcgtgcgcgaagagcagtacggaggtccggtttaagtcatggcacaaattaagaactacaccc
		catacggaatagtttgtattggagttactaactccccagcctcatcaacgacaggagcaatttgaatttgcttgctctctcgatcaatactgatgagttcacccaatcgaaatttaaaatggtgccaatgcgcttgagcaatatagtccaactcttgatcagcgatatccattgagcctgctgc
		ctcgaaaagttgaaatcgcgatccatagctgctccaacatgggtctttttccccttattaataaaatcgattgatgttgctgttattacctcttcgcaaaccctcacacatcttccgcaaagaatacactttgagagttcgcgaattattgcaggac
		tatcgagcgagagttccagccggtcagcttcctccgcatcgatgttgaagccgatatcatacgccttggccgcttgcgccagttgctgcacgcgcggcagaagttctgccatcacccggcccgcctgcgcgcgggaatagcgcgggtggagggcggacagcttgatcgaaatgcccggtccccggtaaatcccgcgcccgcccgatgctgcgccgatggcgtcaatcgcatcggcatagg
		caataataaaaacatgatctgatccatatttattcttttacatctttagttaattgagaaccgggaaggtttaacacttttataagttcagccctgtcataaacagtatgttcaaatccttgtcccatgataatggctttagaagggcaagatttgatacaaaggttacaaaaggtacacatgcccaaattataaatgtgcttatcaattgcccgtcgtgtttttcca
		catcacctaatgggcaaatggtattaccttcaattttacgttgaatatcccacaacaaatcaatgtcttctattgtgccgtggccatccaaaattttatgaataattttttcctatccatcctgttccttcacggcaagggctacattggccgcagctttcgtggtgataaaaacgtgcaaaggtgtgtaagttttgaacaatgctggtgctttcatcc
		ccccacaggcgcaccttggcgcagatggaagttgtcgcgggcgacaccacggtggggcacaccacggccttctgtcagctggtcgaggcactgtcccagtgcc
		ggctacaatcggcgcctcacgccaactggagtaatagagaaacgggtcgttaaacttacggtcggcggtgagcacccatccgttgtttcgcttcgaggtgtcgacctgaaagtcccacagtagctggcccgttttggcgtcgcgcgcttccaacgtcccgctcagcacgccgatgaacaccacgtcgccaacaatcgcgggcgaggaaaacatgtaagctttcgctt
		gcaatatccccgcaatgatcaagatacttaagggctcggatattgccgatgtgcccactatcatccttacccttgacccctgcatcagctgcacagaaaggtgacgggaacatgcgctcattcatgatgaccaaaatcgtgctcaggaacctgattaccgggcccgcaaccctcatgtacccgaaaaaaaaagcgcgagtttaccccgattaccaggggcagaatagatgtgcatatcgatgagtg
		cacggtcttgcgcacttcgacgatttcagaatcgtgagtgatcaagtccatgccttcttcgacaggcgtcgtgcaagcgcgcaacatcttgggcgagccggctgctttcaccacgcaaatgccgcaagctgcccatgcatccagatcgggatgatgacagagagtaggaatcttgacagc
		cgaacgtgggctggatggcttggctgaactatgccgccccggcgctgctattcgtggccggcgggctgagcagcctgatcctggtgaagcgcctgaaggaccccctgcagcagaaggtgctggtgggggcggcgctgctttcggcgggcgttggggc
		agacgagcagcacctcgcgcgtcatgtacagcgcggtgaggagcgcggcggagagaccgatgaggtagatgacgtagtcgtggccgaagaacgcgctgctgatcgcatcgtccttggcccagaagccggccagcggcggcacgcccgcgatggcgagggtcgcgatc
		gctcggcttcgggcatatcaaaaggcgcccggttgatctcagccagcgcggatgcgatgaatatgatgatgaaagccagcggctggtacacgataaaaggaaccttggtttgagcgttgacaatgtcgttcaggctcatcgagccggccagcaggatcggccccacaaaagccatgcccagggccagctcgtagctgatcatttgcgccgtcgagcgcaaaccgcccagcaaggca
		cgtctatgactggggtgtcactggcccgttggtcgcgcagcgcgggcgtgcgcagagacctgcggctcaaccacacggagacctatggcggctacttttacctgaacgttcggagctttgtcggggagaacggtgactgctacgaccgctttttgattcgtatgcgtgagatggccgagagcatccacattgttctgcagatagtgagcaactgagtggaggaggactgtcaagattggggggcggtg
		gggtgagacgacggccgacggccgcttcacgttactcacggtggagtgcctggcttcctgcggcgcggcgccctcgatgcagatcgacaatacccaccatgatggtttgagcgaagcccgcatcgacaggatcctggagggcatcacttgacgcccgacagcgtgttccacaacttcgctgtcacgaacacgtcgcactcgctcgaggcttaccgcgcgcgtggcggataccaggcgctggaaaaggcg
		catgggcagcggcctggctgcgcggctggccggagaagatcaataacacctggcgtcccatgtagaacgcggtcaggaaggcggtgaccaacagaatgataaagaccggcaggttggtcatcgcagcggcgccgataatctcgtccttggagaagaagcctgccagcggcgcaaccccgcaaagggccagcgcgcccgccagatagacccaggtggtctttggcatgcgcttgtacaggccgccca
		cgatacggctcggcggtcttgtccagatcgccgaactgcggcgcgttgcgctcccaggccacggcatggcagccggaccactgaccagcaggctgggcgccgatgtccagcgccatgcgcaggccgtcgccggtgttgtagcgcgtgccgcgcaccgtggccatgtcccagcccggcccgaggtagcgcgagcgcatctcgcggttggcttcgaagccgccgcaggccagcaccacgg
		catgtcgaagctgtagcggtaggcggcattgtcgccagagcgcgaacgctgcaagggcttcatcaatgctgcggcccatcacgaactggtggcccatgatgcgcatggcctggcgaacggccaagcggatggcgggctcgcccatgcggccgatcaggcgcttgaatgaacccacggcgttgcgctgggtttcgccggcaaggttga
		tacgctgcgttttctgcggtttgtgtattgaggcttgtcctacacgtgcattaaccatgacaaatgagtacgaacttgcagatgattcacgcgcaaagttgatctttgaaaagcaggatttactagctccacttcgtcaaggaatgcttatgcctccacatccaatgtatccagatatgacagataccaactattacaacggtgatgtgaagggtgcgcacccatcacaggctaagga
		gggcggcggtatcgttggtgctgctaccctgtacaagctgcagacgcgcttcccgcgcttgaggatcctcctcgtcgaaaaggaacaagcactggccgaccaccagaccggccgcaacagcggtgtcatccacagcggtatctactataagcccggcagtttcaaggccaggaactgtgtcaccggtcgtcgcgagttggtggcctttgccaaggaccacggcatcaagcacgatatctgcggcaag
		gcgatatgcgagtaccggatcaggtggaacatgaagctgaccggcaactcgccgggtgggaccatgaacgggttcttggtcgtgcaatccacgcaataacagatcgggcaggcctcaatgcacccgaagcacttgatgcaccgggaggtctcggacatgatcttctttaaccggtccttgccttcacccagtgcctcaaagtcgtgcttgcgccacttgtcgccgagcttgaacattgcaccttcga
		cacaggcccctgcaaatgacttcaccgtggccgtgttaaaccggtagttctgcaggtaaaagtacatcaacagcagcccaccggccagtgccagcgtcgccaacgctacctctgagtgcgccaacaacgagctgatgatcgcgatcttggcccaaaagcccgccagtggcgggataccgctcatcgcagcaaaaacacagatgaagcccgcgctcaagcccggcactgagctcaag
		aaccggcgaagagcgggttgccgatggcatcggagccaaaggcgcccaacaggatggcaaactcgccaatgaaaccgttcaagccgggcaggcccatcgaagacagcgtcacgatcagggtcagcacaccgtaaatcggcatgattttccacaggccgccaaaggcatccacgtcacgggtgtggcggcgttcatagatcatgccgacgatgaggaacaaggcgccggtgctcaaaccgtggttgatcat
		tcaagttgatgtatttcgatcagccgaacgatccttcgccgctcgaagccccgtttggcatgaaagttatgctgtcggccaacggtctgggtgttgccgttctcggtatcttcccgcagacgctgatgtcgctgtgcgccttctcgttgctgcgctcgctctgattcctgcgcaggaatcaatagcagatcaaagacccgcttcggcgggtctttttcatatggagagtcgcatgaaaca
		gcggctgtcggagcggctttcgccgtgatgttcggaaaaataggtatttggcgggttcgggcttaacatcttcaatccggcaatcctgggcagaaccttcatctatatctcttttccgtcagcagatgacggtgagctggattaagccgtatctgctgagtgatttcccgggcggattagtgacatggacggctgaccctgtaatgaaaacgtctgccactatcctgggtcaaatcagaaatacaggcacg
		acatgggcggcctgcgcaaatacatgccgatcacctggatcacttcgctgatcggctcgctggcgctgatcggcacgccgttcctggccggcttctattccaaggactccatcatcgaggccgccgcgctgtcggaaatccccggcagcagcttcgcctacttcgcggtgctgaccggcgtcttcgtcaccgcgttctactccttccgcatgtattttctggtgttccacggc
		gaccgggccggcaaagccctgtttgctggctgtgtagcgcgtcccctccggcgctgccggggcaaggacatttttctcttcatatgcctggttgatggcgcccacgactgcctctgtggtataagtcgcgcctgataccgcgtcaatgtctcctattgacacggggatggtcttgcccacaaactgcttggtaaagccggtctccttggctcccatgccaaatccttctgtctcagcgaactgctcgtcgccc
		atgatgctcgacgacttcgccggtctggcttcgacgcagccgatggccgcgcttgcgatgacgatcttcatggtgtcattgatgggtgtgccgccgttgctcgggttctacgcgaagtactacgtcatcgtcgcggccatcaacgccaatctgctctggctggcggtcgcggtcgtgctcgcctctgccatcagcgcctatttctacctttcgtgtggta
		gtctccttgatatcctccaccgattcatggtcctggatgcagaccgatccctcgacgagcgccacatccatctctgggatatgccggacgtcggcgagcgtgaggctgtagacgaggtcggcgtagtcgtccagaatcttgatgagtcccaagttattatcggccaaggacacaaggcagccggtacagccgctcatgtgtacatgcccgagcttgatcttatttgccactggttttgt
		aatcgcgaaagcgtggttatcctttcaaggtcggcgccctccatcccgggctttgcctcgaacatcatcgcggtttcctcacccatgagcgcggcgaaattctggttgcactcgattatccgcaaggaggagtcgcagatgaccacgcccgaaggcatcgccttgatgagcccgttcgcttttttctgcgcgagctttcgcatgtacgagacgcacatcgtcttttcggcgcgccgctcaagcatcg
		atcacgtcgtgctcgcctggctggatccagtacgccgagaagaacttccaggacctgctgccgaacctgagcagctgcaagtcgccgcagcagatgcacggagctctgacgaagcactactgggcgaagaaccaggggcttgagccaaaggacgtcacaacgatcagcatcatgccctgtgtcgcgaagaagctggagaagg
		cgtttcttttttggagcctggtgaaggtcgtagtggtgtcggtcgtgctgctcgtcggcgtcgcatacaccgtcctgcttgagcgcaagctcgtcggccgtattcagaatcgctgggggcccagccgcgttggccctttcggcctgctgcagcggggtataatacagctaataaaaaaaa
		ccgtgagcgtgcaaacacggggatccggtgactgatcgggcccgatttctggtgtatggatatggaaacccgggtcgtcgtgatgacggcctgggtgttttgtttgcggagcgtatcgaatcgttggcaatagccggtgttcgggtcgacacc
		ccggcaacagaatctactaacggtatcatagatagttgataggtctaatatattatcgatagtccatctttgtgtcgaaagataaaatctacatgatatttctgttgtaatacctgtgataattctgtacaaaatttatgtatgtcgccagtccagtcactggctgtccaaacaccacctactacatcagctaagtcttgtaaagctggatccatacttagtgtctgtttaggtgatagtatgt
		gtcaacatgggccgcagcaccccagcacccacggcgtgctgcgcctggtcgtcaccctcgacggcgagctcgtcaaggacgtcatcccggtcatcggctacctgcaccgctgcaaggagaagctggccgagaagcgcacctacttccagtacatcccgatcatcgaccgcaccgagtacctcgccagcatcaactgcgagtggggctacgtcatgacggtcgagaagctcgccggcat
		gaccaaatgcgaccagcgccacccgttgccatcagaacaatcttggcttccaagatgtagagctcacccgtttccatttccagcgcagtaacgccgacaacatcaccatcgtcatcacgaattaaatccaaggccagccactcaacaaaaaagttggtcttggcctgcacgttacgctgataaagcgtgtgcaacatggcgtggccagttcggtcggccgcagcacaggcgcgctgaaccggcttctcg
		gggcgatatcgaaaagctggaacagctcgcgcaaacggtccggtcgcagagtctatgcggactcggcaggactgcgcccaatccggtgctgacgaccattaaatatttccgcgccgaatttgaagcccacatcgccggacgctgcccggcgggtaagtgcaaaaagctgatcacctattcaatcagcgacaagtgcatcggctgcacgaaatgtgcggtcgcgtgcccggtcgaagcgatcagcggtg
		gaccaaatgcgaccagcgccacccgttgccatcagaacaatcttggcttccaagatgtagagctcacccgtttccatttccagcgcagtaacgccgacaacatcaccatcgtcatcacgaattaaatccaaggccagccactcaacaaaaaagttggtcttggcctgcacgttacgctgataaagcgtgtgcaacatggcgtggccagttcggtcggccgcagcacaggcgcgctgaaccggctt
		atttcggcaagccgacgccgcgccacaagatcgcaacgcctcccttctatgcggcctggtcgacaccggtgctgtcacgacacgcgcgcgggattgcgtatcaatgcgcagtgtcaggtgatcgacatgcggggacaattgatcccgggcctctattgtgggggcgaatctgccggcgggttcagcgagcacgggcttgcacgctgtatcgttcaagggctgatcgccgcgcgccacgcgg
		tcatgatggtgatcgtgcgcatgagcatcatcatgaccccaacgggctttaccgtggaatacatagaagtacaggcggaaagaatacaaagctgtcacaaagacgctagccatgactgcgaagtaagcaaagcctgaaccagggatgtggctagcagctaccgcttcgatgatagagtcttttgaatagaagcctgagaaaaatggtgttccgatcaaggctaagttacctagcaaca
		cacgcgtggggatgtcccacactaagatggtttgtttattgctcatttagcaggtatcgcaatactcttttcactaaagatgccttcagctgcagtggtgtgacaggctccacaattggccgggcttttaacgcccgccctcttccaaacgtctgccttgatctcatcatgctcacgaataaaccaaggagttttggaatgcgattttctggggctactacgttatatttttgcttagtagcagcattcc
		acatcaacgcctattcatcagttagtcattgtggttttgttttattaggaattggcatgcttacaaaaactgctatcaccggcgcagtaatgcaaatggtttctcacggattgatgacagcattgttcttcgccgttattggtattgtttatgaaagaacccatacgcgacaggtaaatgaaatgggcggactgatgaaagtgatgccattcactatgacagttttatttattgttggcttatgttcattgggg
		gcatatctgtaacgaggaaagcagcgcgtacccatatataaaaacaaacggctgttgtttttaaccaaaaaaaacaaccaggtataaacctaaaaatcaattggagctaaccagccacctaaaaaaataagttaatgtcgaactcatcattatcatattagcatattcccctaaaaaaagagcacaaaaccaacggcggctatactctgtgttatacccagaaacaag
		caacatcaataaatttgcatggcacttagattatcaagctgtcatcgctattggtgcgttatttacgacaggtaaattacatgttgagcgtgttgtggcactttctgggccaactgttaaagagccgcgtttagtgcgtactcgagtcggtgcaaatttaagtgatttaaccgcaaatgaactcgaagatggcgt
		gagatcccgatcgacggggtgccgcggacgtgcgcacggctctcggccagctcgatgtccnccgtcgaggcctcgagcttgtgcgcggcgatcgccatgatccgatccctcaggatcgacgctgtcgcgtcgaccgcgcccgccgtcatcgagccgctgcggctgccggcgacaccggcaccgaaacccgtc
		attggtaagcggtgccatggccataatgtattttatcacatttgctgcttttagcttttatgcattaatgccgcaactcatcgcttttgctttgatggtaatgtttacaatttttacagttgtaatatcaatcaatttcaataaacagataattgcaattatcggattggttggggcttatgctgtcccgtttttgttgagtgatggttcgggaaatattgctgtacttttttc
		tattcatccaccaccagcctgccttgagcgcctttggtgaccgctaatttttgaataaattccgcgctcactactccgggcacccagatcaccagcgcctgttccaggtcctgccgatttgaaatctttactctagcgccttctatcgcttccacctgcgcattgactaaaacctcaattcccattctttc
		cctggcgcggtcgttcaacgacatgacgggagagctgcggcgcacgcgcggggcgctgcacgcgctcgcggaggatctggagcggcagatggacgagcgcacgatggcgctgcggcaggcgcaggactcgctcgtccagtcggagaaaatggtgtcgctcgggaagctcgcggcctccatcgcccacgagatcaacaacccgctcgcgggc
	Respiration	acttctgctgataaggatattcttgaaataatgcaggctgatttgcagcgggctttgaaaaaccacgcaaggatcggcgctgggcgatggcaatcgacctgaaaaatgcatcggttgtcatgcctgcaccacaggctgcatgtcagaaaacctcactcctccggaaattcagtatcgtccggttaaagaagaggaac
		cgggtgggacgacgccttcgtgcggatcgcccgccacctgcaggcgctgcccgatccgaaccaggccatcttctacacctcgggccgggccagcaacgaggccgccttcctctaccagctgttcgtgcgcgagtacggcaccaacaactttcccgactgctccaacatgtgccacgagcccagcggcagcggcatgc
		cggcaatggcttcgcagatgatgggcagccgttgctggggcacctcagccagcattcgttcgatgcctcgatgctggtagcccagttggatttcgagatgaaggacctcttccccggcgcactggaagcggaaatgtcccggctcgatgataccggcgtgtaccggaccgacggcgacctcgtggatcgattcgcca
		ggcgatcaggcggtcattgagaacgactgcggcagcgtcaaggcgccagttgaactaagcgacgaaatgatgccgggggtggtcagtctgccgcatggctgggggcatgacctgcctggctcgcggctaagcatcgccgcgtcagttccgggcagcaacctcaatgccttgtttgatgaaaacctgcgcgacccgctttccggcaatgccgtgctcagtggtgtgccggtgcgcgttcgg
		gggtgaaataaacaattcactgcaaacaccggcacggcaatatttatggcggatatgttcgtcgtattcatgcctgaaatacttgatggtactaaggaccggattcggagccgtctgacccaatccgcaaatcgccgattctttgatcgaa
		tatgaatgcttgataataggaaccagtagcaggacctgcaaaacctgcatgtatattttgaatggttctatcagatcgaataaatagggtagtaggaaaacctgtaaaattttttaattgaggaaatgttttcataaccgcttcaccatttgaaacgcctccaaaaacttgttggtattcaatgccaaatttttctttgaaacgggccattgttttttgggc
		agcgccgagatctcgagcggcgcgctccaggccgccacctttgtcgacgccgggcgacggcgggcgctcggcgagttcgccggcaaggtcgtggtcatcaacttctgggcgacctggtgcgcgccctgccgagccgagatgcctgcgttcgagcgcgtccagcgccgctgggcccagcgccaggtccagttcgtcgggctgtctgccgaacccccggagctcgcccagcgcttcggccgcgaccttgggctg
		tcgcgaagattatttacaatagcattttgatgttctgcatatcgatggtatgctttgttttttatgcagtcgtttttaagaatccgattcaagacccggcttttatttgttgtcggttttcttaggcggactaagcttttcgacggttttgagtatggtgtcggcgattgcttcgaaggtcaataataacaccactttgatggcgattttgagtttcccgattatggtgcctttgttgatgttatt
		actcggcggcgcctccccgtccccgaatccgccagccggtggactcgagcacggcgcgcatgtgctcgccttcgacgtgcaccatctcgaggctcttgcgcgcagcgggaggggccggacggggcgcgtcgatggtcagccgggcttcggtggcgagaatcatcgcccgctcgaccctgttccgaagctcgcggatgttgccgggccacgaataggcctgcagcgcgagcaggcttctcttcgacaccg
		ggtttagagaacagatttgtctaatcgtatgcccttacggacgaatgcaaagtgtactcgtagatagaaatacaataatgattgcctatgattatattcgaggtgaaaaacgtggattctataaaaaggaggaaaatagattaagtagcggtaaaggtgattgt
		aatggcttaatgagcagtctcgtcagttgggttttgatggcttgcgcatcactgatacccatcttggatcggccacagagaggttgcgtgagtggttggatcaaggggcgtcatggtcagatggagtacatggctaaacatgctgatttacgctctgatcccggcatgctggttcccggtgctgtcagggtcatttgtgtcacgatgaac
		ttggcccatgaattaaatcaaccgcttgcagctatctccaactattgcatgggtgtagcaaaacgtttacaaggtcacctagatcccgtcacccagaaagatattcttcctgctttggaaaaggcctctgatcaagcgcatagagccggcaccatcattcaacgtatcaaaggatttgtgaagcgcagcgagcctcaacgcaaatcatgcgatatcagtgaaattattaatgatgcggttgg
		ggaggtccagcttgccggagccctggaggaaaagaggaaaaagctgttcggaagatcgctcaagctccgccaggtcagcgcggggggatgcaacggatg
		cgcggacgtcaggatggcgcttcttcgggtacagcacgtatttgaagagggtcacgatcgggcgggcgaaggaggaggaactgtactgcatccgggaggtcggctccgcgtagccgcagtcccaggtgccgatccgcgcggccgggccgcgcgtaccccggtcgcgcgtaccgcggtcgcgtcccttccccgcca
		gcccaaggcgccggagtgcacgtggccaacagtccagtcggtgtagtggctcaaggcattcacggtcttgatggacatcatcgggccttcgaaggtcgacatgccgtagaaagacaaagacacaatcaaaaagcgcaggatcggatcgtcgcgcagtttgtgccaggcgcccgacagggtcatgatgccattgatcatgccgccccagctggggccaacaagatgagcgagaagacca
		tgaatcattcgctttttaaggggcttttatttttgggcgcgggatcggttattcagaagacgcatacgggggaggat
		agatgccggcgaacatcatgttgccgacgaacgcgaagatgaccgcgttggtgtgcagcggacgcagccggctgaaggtcagccagggtgtgtcgaagttgagg
		cacgatcttcagcatcatgaggatgaatttcgatcaagtcttctgcgtgccaagcagtgttattagtgcgacgagtttgcgcacccacattgtattgagaaagaattccggccagtggttaagataagtgggatatttagcattcactttttctgtcgttggcacatattcagtaataaagaatttacctttaccgcgcacaaattcatcaatgtgcatcgttggcgtacctgctggattag
		agaacgcggcggcgtggagaccgccggtgctctcaaagatgtcctgcctctcacgcaattgctgcggaagccgatggattacgccggcgtcgatcgtgagattgcttgacggaacgactgcacaccggttggctgccaatgactccagtgatttcttcccgcacactccgcaggccgacgtcattatgaagccccgctgcgagttcgcaggttggattaccacttccgaggagagt
		gcagatccccgacatgtatgttgacaaactgcgtttcttcctgttcggcggtgtgacggtttggaagaaacccgaagatatagggcacatcaccatctaccagaacgtttaaggggcgcatatgacagcacaagacatattcgcggaaatggaatcgtttaccaacgaggaaatggacgttatcaacaaga
		cgggtcaataatcctgcacccatccaaccagccagcaacagattcggcaaagtacccagggcaaaagcggccatccataacgcacccgtcgatggattaccactcgcgatcgcagttgccagcgcactgtataccaagccacagggcagaaaaccccaggccagacccaccataagcgcacggccgggtgtcgttacaggaaaaaactgtctggccacgggctcgat
		gctgccgcgcgcgccgcaaatccgtatcgaagaccgactggccgagcgtcgcaacatccacgtcgaccgcttgcagatccagcaggtgttgctgaacctgatgaaaaatgccttcgatgcgcattgcgcgatcgaccggtccggagaaccgatcgagatcttgctggagccagccggcgaacgtacgaaaatcaccgttcgcgaccatggtccgggcctggccgagtgaagagctaaagaagagtta
		cccctgcccagttggtgggtctacctcttcattttgagcatcgtcttttccgtcggttattgggccttttaccactggggcggcgtcggcaagtcggaaatcgccgtgtatcaggaagaggaagcggcgtaccaaaagtggctggctgaggaagcggcgaaggcgccgcccgtggaggaaactgccttggccacgctggcccaaga
		gacattcctttcttgtttggccttctgtatcacatcttcaaaacggctgggaagataagaagtacatcaatgaccgcgtttacggcatggatgag
		gttgttcttgatttataatatttgtttctctgttgtctctcacaaaataattatatgtgatgaattttctgtttcacttggtgtgtttatttcaccttgattattattttcttcatttttaatttggtgcagcaatccgaacaggaaaggaatgtccgagcccgaacggatgcgcacgtactcgtcggccttggcggccgtgcgcgtgaagcgcggatcgaccacgatcagcttgcagccgg
		caccgatgatcttgcctttccattttgaccatgcattcatttgcggcatccaggttggttggcataccaagcggccagactggtaatgtctttcggctgcagggtgttggcgatgctattcatcaccgggtgtttgcggctgccgctgcggtacgcgttcagcgccgtcaccaggtaggcctcatgctggcagcgcaggatgggattgaccgcaatacggctttggccgtcggcg
		agaatttgtgaatgcgcgttgtgatgtagcttcattcaacaaatggcgtacttttgtgtcagatgttcgtcattcaccagaaaatactg
		agggtgagtcatcgtccatcagaattcgatgggccggtccttccatgtcctcgaactgcccgctcttgaccgcccatagaaaaaccacggcgatcgccgcgacaaaaaccagactgagcggtatcaaaaggtaaaggatgtccattgattcactttatgcgcggcgggatggtatttcccaaccagctttagacacaatc
		agttaagtttgtgacctcgctctggagccgctcgatccgttgaagatcggaaaggtgacgggcggtcaggctgacaatgatctggaggattctttatgctcttcggtaaaatacgagggcttcagtgagttaaggcagatgacggcgatgacttcgtcatcacagatgaccggaactgcaatctcacttttgatttcatcatgcattgagcggtgaaaaccgcctgatttcag
		caagatcaatcacttcaaaaccatgattctccagcagggtgcagacgatatttttgccgatgtcatgaatatcaccttcaactgttgccatgagaatttttgccaaaggttcgatacccagtccatgcaattctgctttcagccttttgaaggcagtctgcattgtctctgcagagcgcatgacttgcggcaggaacagctgattttctcaaaacgcctgccaacct
		attcttcacggatattcatcacatttacatctctgccgtgctcaccattgttatcaaggccgtggtcatcccgcggattttgaagaaagtaatcgagcggtcggatgtgaatcgtgatctcgaaatgaacgtgaacgtggcgaccgggttgttgatctgtggtgcgctcgtgatattggcggtcttgatcacccagcccgttattccgctgggctttttgctcacccgcgactctctggctatcgcg
		ccctacgacaccgccgacaccctcatcgacgaagacggcgacggctaccagcccggggaattcatcgatcctgcccagcgcgactgcgacgacaccaacgcggagatccacccgggcgccaaggagacccctggcgacagcgttgacagcaactgcgatggagcc
		ggtcgcctttctcctccacactgtcaatattattgcccgtgctgttgaaaccgggcacaccccgatcaccagccatcacgagacggtctcgttttttgcttggtccttgggttgctgttacctgtccttccgctggcgatatacaatgaaaaatttgggcatctttgtcagcgttctcgt
		gaaggactcttaccgtatgaacgatacctacgaacgattgcgcgacaggcttgaaatgatggcgaccggttacccggcaacggccaacggcgttgagatcaaaattcttcggcagcttttcagcgaggaagatgcggacctgtttctgaaaatggaggccaagcc
		gaagtcgatcacgaacgcgtacagcaggtagcggccgatggtgtcgacgcaagtagcatgtcgatcggctgctcgcgcagaccaggcgaagcccatgtacatgagcatcaccagcgcgatgccggagacgatcgccgagaacaggaagacgatcggcatcagcggcgtcgaccaccacggggttggccttgatcgagccgaagatgaagccgacgtagccgtggagcaggaagg
		gtggatgcggcactcgccgtcggaacaccctgcgggcttcggtgtgatggcggtcacgaccgggctcgtcttcttcgattttgcgtatttccgcgagcagatgtg
		cgtcccgaccgggctgtacccgtctggtatgcagaatcccgccatgagctccttgttgccatatgcgacttccgtcgatcctacccaacagctgccaataccatgggagtgagcggcaagcatcatgttctccgcgcagagagaacagtcgatctcccggaaccggctccccgttttgccgatgatcatgatgacggtcggggcatggtaatagatagagtaattctcgctctccagca
		aatgatgccgtcgttcactgttactacgcgacgacggttaacaccccaaggaacttcgttatcgtttttac
		cacgtctgggatgaaacccttgaggaatacaaacaatccgatgcccaagtggtggagctggttgttcgttatcactgtgatctttgcactggtttacctgggccctctatcctggtctgggtaatttcaagggcatgctgggttggacctcggttggtcagcacacgaccgaagtggccaagatggatgccacggtcaagcccttgttcgacaagtacatggctatggatgtcaaggct
		tccctcaactatccaagcaggcgcgccacgtgctggaaccagaccaccagcggggcgggaagatagattcccgcgcccagaaccaacgcgagatgcgcgaacaacggcacataggatgcctcggccgacgccgtgctgccgcggggctcgccgaaggcgacgctggtaaggcgcaacgtcagcgcgccaaaggtcagtagcagcccgaacaccagcacgatcgccagcagcggctgccgcgcgaagg
		gcgattccattgtgtgtgagcttgcgggttcccgaaatctgctggcaagtctaccgggtctcttggcgcagacgtgcgcgtacttcattccccctgtgtcggccggtgtgaaaacggcaccagttgcggttgtcggacagaatcccatcacgcatgccaccgacgtgcgcgtgcgtgacgccgttcagcatggtcgcgtcacccacccgctcgagaacacgacgatcacgcccgggcatatcgact
		ggcgcccaccgatgccaaggtattgattacggggagcaacggcagtggaaaagagctggtggcgcgctggctgcatagaaaaag
		aggtcgatgccgtccggtgcggcccgcaccttggccagggtcaggccctcgggcacgcggccaaactgatcgccataaggtccggtgcgcagcgcgagttccagcaggcggtccgggccgcgcaggccttgcgtggcttcgatcaccgcctgagccttctcaccgaatagtttcttcgcgtcttcggcaaagtagcggtcgtcgatctcgcgggccggggtttgtgcgccctggccctgcacgatgcccgcag
		gcgtcatgccgcccaaagcacataaagaaccattcaacatggtgtcgcttaaatcacgaactaattccatgtttttttgcatgatcttt
		cctgggctctgatcgtctggctcaactacgcagcctggctgcacatgcggctcatgaagggtctgcgcggcacggtgtctgcctggtgggccctggttggcctggcggtaacgacgtttgcatttctgggggtgaacatgttcctgagcggtttgcacagctacggcacgctgtgatggtgtgaggccccggtgtgcatcctggtcgggccgacaactatggtgt
		acaaatgaagaagtttatgttgttcagaagatgaccagagcagcatttcaaaacaataacattgatacttgtgctcgtgtttgccacagtccaactggttag
		cctgggctctgatcgtctggctcaactacgcagcctggctgcacatgcggctcatgaagggtctgcgcggcacggtgtctgcctggtgggccctggttggcctggcggtaacgacgtttgcatttctgggggtgaacatgttcctgagcggtttgcacagctacggcacgctgtgatggtgtgaggccccggtcgtgcatcctggtcgggccgacaactatggtgtcttcggtgtaacctgaac
		aaaaatggatgattggtgtgaatccaatttccattgttcagccatttttcatttatcaaccaggatggcaaaataattactgacaaggatgttgaaggaaaggtatatgtggcggaatatttttttaccacctgcccgggaatctgtcccacgatgaatacc
		aacgcccgctggaacttcgtcggccccttcaagaagatgaccttcgccagtaacatgcagcacaaaatactattgggggtccggctcaagaagccggtcgagtggtcgctcaagacctggatggcgccgtgggccgtacatcgccagcgtgctctatcacgatttttacttggtatccgcgcttcagcgccggccagatgcgcgagtgcctggagagcccctggggccggctgttccagaatt
		gatcgagcggcaaatggccaagcccatgcccatgccttccgatttggtcgaataaaaaggggtgcacagttggtcaatggtccgtccagccacacccgg
		gacgccaagctggtcgaagccaagtcgcccgtggccggtgttgtggaaatccacgagatggtcatggccgaccaggtcatgaagatgcgcgccatccccagcctggcgctgccggccggcaaggcggtggaactcaagcccggcggctaccacgtcatgctga
		acttctgctgataaggatattcttgaaataatgcaggctgatttgcagcgggctttgaaaaaccacgcaaggatcggcgctgggcgatggcaatcgacctgaaaaatgcatcggttgtcatgcctgcaccacaggctgcatgtcagaaaacctcactcctccggaaattcagtatcgtccggttaaagaagaggaac
	Na+- Coupled Energetics	aaccggcgaagttgttaccgacgaacagttgggtggtgcttcggttcacggttcaaaatcgggtgtttctcactttattgctgaagacg
		cagtataaggtggaaataattaaggaagatgagaaaaccgtagagttggaagttaatgggacaccctatgtcgttgaaatggaacggacaaccactgtcaaaccgactatttcacgaccagctcctgctcctgtgacttcgcaaggagcacctgttgt
		cgtcgttgagcgcgtcaaacacgcggaaaacatcgacgccgttggcggccgcccgctcgacgaacgcctccacgacgtcatcggcgtagtgccggtagcccagaaggttctgcccgcgaagaagcatctgcatgggcgtcttcggcatggcggccttgagctggcgtatccgctccc

## Sheet: Virulence
Subsystem Hierarchy 1	Subsystem Hierarchy 2	Sequences
Virulence	Adhesion	agaatacttttattatgcttaatgttgacgggttgtgcaaacattcatatgaatgccgcaaaagaagaaccagttaagattgaagcaaggaagacattagcttctataccggaattggatggaccgccaattcctattgccgtctattcatttatggataagactgggcaaaagaagactacagataatttagctttatttagtacagcagtaacacagggtgctgaggtatttc
		tgtcgagcacttccgccaaatcgccacccgtctggcgctgaatgagcacggcggtgacgaagaagcgcacgtccatctggtcgatgcggttggccatattcagcagagcttcttcgattttgatgccgaggttctgctcgtagaacacctgagcgaactctttggcgatcgggttgggcagttgctcgcttaccagttgaatggcgctggccaacgagtgaccggccctgagcccctggccca
		cagatgatgcgagtgatggcatctgatccgagtcgccatccgagtcagttgcccagtcgccgggcgaggctgagtcgccgtccgaggcagtgtccacatccgagtcaccatccgagtcgctgatcatccgagtcgctcccatggtctttgttcatctgagtcaatctgccttcgagcgacccacccatg
		ccaatgcctaaccaacgtgctcctgtgccgcctgttagtgtattagagttatagtcaataatgccaccttctaagataacacctgccatttgcaatggaggtaaaggtttagcatttgttccttcatagatctcacgtgtctgtttgatcatctggcgctctttcaacaagttgtctaagccaacacgttcaacaactgtgaaccattgacgatttccaacttcttgtagacttttcattaggtatgcttcag
		taccgacgttaacacttctcctgtgctaactgatactgtacgtaaattaactgtaactgtgtcctcttgatattgtgtagtaccaccaataccaaatattcgtaatccacttccgcctgtgcgagtgtttgaatcatagcctatgataccaccttcccattataatgcctgcaaacatcataggaggtaacggcttagcatcacgtcccttgatactgctca
		tcacgccccgcgggaccattcaacttcaggtttcccccgaagtcagctcccttgactactccaatgcagtcaccattgccggcactacggtgccaagcccttagcacgcgccgtgtgcagaccgaagtggaacttgacagcggccagagttttgtcattgccggactgatggacaaccggatgacggaaaaccatcagcaaaattccgggcctggccagcattccgctgctcggcaagctcttcacc
		ggttgcccttaaataaatcaatagagatttttcctgtttttttccacgcctgtgaaaaacatccgcaaaaaacagctgcttcattaatatcctctttgctaggattctctgtctgtattatcataaaaggtgatcctggttcacttgtatgtaaaaccatatattctggctttgagaaatattgtattgcaagttcgttttgttcatcactcttaccttccaa
		tttgcaatatcgataatatattctatcatagaatggagttatattcctcttctaaactccacgatgggttttgtcatagcgctaattgtggcttacggaatgttctatctaggacaatggggtggaggagatagtaagttaataatggggcttggtgcaatattagggtatttaatgttattttcgattatttggaaagtaaaaaaatttctggttactaatactgatagcaagcatagttcttttgg
		cagcacagtcggcatgaacttcagcccgacaccgaattcttttttcttcgaggctgatggtgctgccgccgccatcgcggttttgcgcgaccggaataaaaatgcggccacccgacaaaaagctggcctgctgaccgctgatggccatgatgttgggttcagccaatacacgcaccaggccgtctcgcttttgcgcgtcgatgcccaaaagcgtggcgttgccagcggtggccgagaggttgccgcccaccg
		tgcattgaactagagaatgaatggccagcctgtagagagcgtgcaataaaatctaagacatctgggagctgacgctctagggcattttgccgacgccgaatcaacatattgagaatgatgtacggtatcgaaccaacaacgacactgagaactagtcctgttagcaaagaaagtccggatgcccatagtattaaaaacgcataacagccaaaggactatcgttacaaccaaaaactcatcgactttgacgt
		tgttgcgggtcgcgcccgcacccgacgcacccgatgcacccgggcctccggttccgcccgtgccacccgaggcccccgtggcgccggtcggctcgctcgcaccggtcgcacccgaggcaccatccaagcccggaacaccagacgcgccaggcacaccagacgcgcccgggattccgctggaaccggggataccgctagcgccgctagaaccggccggtccaac
		agaatacttttattatgcttaatgttgacgggttgtgcaaacattcatatgaatgccgcaaaagaagaaccagttaagattgaagcaaggaagacattagcttctataccggaattggatggaccgccaattcctattgccgtctattcatttatggataagactgggcaaaagaagactacagataatttagctttatttagtacagcagtaacacagggtgctgaggtatttc
	Invasion/Intracellular Resistance	tagtcgcaccacaattctgttaatgcgacatttttagtcacatcaatcgaggtgagcttattcgaagagcatttcaaggatgtcaatgctgtatttttggttacatcaagcgaagtgtgtttattcccagagctgtttagtatacttaacgccgtattttgggtgacatcaagcgaggtgagccctattatattcacaaatcaactctgtcaatgctgtatttttagtcacattaagcgaggagaga
		ctcagctcgctgagaaacaggatttccagccagcttcagtacctttagcttgctgttcactgctaaacaggcgatattttcaaacgcagcaaccaggttttcagccaaatccagcactttcagcctttccaaatgacacaaagacgaaaccgcagttaggcgattagcactgagatatgcttctttcagccctttgcatcgctgcagcatactcagcctttgtagggagtttggtggggagtaggg
		atcaggtttctctggtatcagtggatactctggtacatcaggtttctctggtatatcaggtttctcaggtatcagtggatactcaggcataagtggtttctcaggtatatctggatactcaggtatatctggtttctctggcatatctggcttcagtggcagatcaggatatagtggttactcaggtgtatctggcttctctggtatatctggttatagcggttactcaggtg
	Iron Scavenging Mechanisms	tatcaggacgctacaaccatattaaagtggaaaaccgtagataagttgattcctgatacaactgatcctgaaacactgagcggtgatcatagtttcaatagattaatcctgctgttggcttgagctttacaccgactaaggatttaacagtgtacggttcatataatgaaggtatgcgcgctccgacttctatggagttaggctgtgctaacccactgtacccttgcaagctgccaaatgcgatgg
		ctactagtaactcatgatcaatttgaggcctttgcgattgcagataaagtcggcgtgatgacagacggaaaagtcctacagtgggatagcccgtacgagctgtatcacaaaccagtcaatcgctatattgctgattttattggtcgaggagtatttgttaaaggcactgtgcaatctaataacaaagtcaaaattgagtt
		cctccctcgccgcccccggtctcctcgagcgcatccgcgaccaaggtgtcgaccatctcctcctcgccggcatcgagggcccggtctgcgtgcaccagaccgccatccatgccctcgccgagggcctcggcgtcaccttgctctgcgacgccatcggcgccagaaggcccgccgaccaggagccctgcctcgccgcgctcgcccgcgccggcgcccatgtccttcccgtcgagaccgtct
		ggtagtaacttagagagaatttgctgcgtttttctgttaataacaagtgtttagttggctgtcttctagcatataagccaagcgtttttcaggaaaacaggggtctagcgcaacgtaagccgcccctgcttttaaaatgcctaaaatcgccaccaacatttcgatagagc
		cattatcgaagaaacccccgatattatactgaatgtggttgatgggacaaaccttgaaaggaacatgttcctgacgactcagttgatcgatatggacatcaaagttgtgattgccttgaacatgtacgacgatatggtctcgggtggtgcaaaacttgaatccaaaacattgggccaattgctagggatcccgatcattcccacaatggccagtaaaggtgtaggtcttgacctgctttttgatgaaatc
		ccgaattttcggcatccccatttttctggcggccatgtacatgatgttcatgttcaccatcaatctgggcgggg
		aattttaatgactatctattgcttcgcaagttcgtcaatggcaaatagttatgcggtggaaataggcgacacgaaattattaatcgaaaccggattagaatattcaacgcttcgcaagaagttaatagaaattaaccgaatgattactgattataacggttgcctagtcacccatagtcacgccgaccacttccgtagcgtcaaagcaataagtcgatatgttcccatatacgcc
		atcaccattggaataatgatttcaccagcgcgaacaataaaccctttcaaacgttcccaagttcgaagaacaacgcctttcaaagttgggatatgataaggcggtaattccattacaaaatgccccgcttcaccgcgtaacaaagtgtatttcataattaagcccgtgaagatagcaacaccaatcccaatcaaatacaaac
		gagcgcatccgccccggcggatccagcggtaaggtcacgtgcacggtcgtctcggtgatcccgtacatgttgatcatccgcggacactcgtcgccgtgccgatcgaaccacggaagcagcgagcgcggctccagcgcctcgccaccgaagatgactgtccgcaaagcgagggc
		tgctgctcaatgaccgcgagattgccggcccatcggtgttcctgccgcctgaacagcgttcgatcggg
		gacgagaaaactatctttgactctcaatctcaatgacgactatgaaggtggtgagtttgaagtcttcactggtgatttcgaaaaaggtaacattcttccaacaaagaagggaagatgtattttgtttccatctttccttcttcatcgagtgaaaccagttacagctggagttagaaagtctgtagtcgtgtgggctatgggttctaagtttcgcta
		attccgagcctaaggtggatgactacgaggattatctttttctcgtcgtacacgccctgaccatggaggagcataaagggcaaaaggagcttgcgaccatcgagctgaatctctttcttggctccaattacgtggtcacttttcacacggctcccattgaaagcgtcacccaggatatcgcgaggacgcatcagaagccggcgggcatgatgagctccggagccgatcttttggcgcaaacgcttctcg
		gagatacagttgaatgttccatattggctttccaattggaggtgtttcaaatccattctcttggcgacactgccataccgatacgtcaatagccgcttcggttgggccatatagattccaaagcaccacattatttagcttattgtgcgcgttaaatacaacttgcccacctaatgcttcaccgctggcgacaagctgctttattgatttgcagtccccaggtttaa
		cataggtaatgtctttttcattgcaatatttttcgacaacctgtttgtcggaagtctggtatacatcctgccacgacaacccaagacctttgaccagattgcgcacatataaaatacctttttcttcaaaacgagctttcgtcttctcagataactgtccaagcacctggcgactatcagagattggtgtttcgccttttgttgc
		ccatactgaagaacaggcactcccaattgaacaagggataataaccggagaagcaccgctaacgccgggccaggcaaggtttttcgaaaaagcgctccccgatcagcattggtggaatggatcggttatattcaaggtcaaccgcacccgagtggatgttggtctactggaacaagcgatctggcatgtattgctccatcacgatgcgctgcgggcgcgttttgtgtgtgatgaatcgggttggaggc
		cggatctggatggtcacatcgatcgtcagcgtctggcagccctgcccttggcactggataccaacccgtcccccagcgagatctccgaggtcatgctcgccggtatctgccgctcgctcttgggggtggataccctcggtatgcgagacaacttcttcgccctgggggccgattccctgaaagccgtaagcctgctccacgagatcgagcgggagttcgggcggtccgtttcgccggaagtcctg
		gatacaccggcatgccactggccttcgctaaacaggtaaccgatatccagctgcttggttttttcggttatcaatattgaaagcactgacggtggcagcagattccctggcaatgatttcccagtagtcggggaagcgttcgctgcggcctataccgctgtacaccgtacctatggccagatcctgttcgtagcggataaagccgctaccgaggtgatcacg
		ggaatcacatgatcggtgaaccaattagcgtaatagctgagattgcggtgttctatcataacacctttcgggttaccggtcgaacctgatgtatacatgatataggctagatcagtttcctttattgaattcggttttaaaacccttttttctagcaggctgtttcaatgcattccagtcagggatgagcattcgtgtttgcattgatgccaaaagagttgaaagtgagttatctgtgataacaagtttggcat
		ccatcgctcaggtgaatcaacacgatattattcactgccgttaaatcgttcgccatgagtaatttcatcgtgttttcaaaactcatgtggcttttgataatccgattacgcaaaaacatcggtagcatctcgtcctcacatctttgctttatcagctcggtagagtaattggcttctacgatgatgttgttcagaccttcgaatgtatatggtgaatacatcgtatcagttaaaaaaaagcgttaag
		attcaggtataagtggtttctctggtgattcaggtataagtggctattcaggagaatcaggtttctcaggagtatctggattcagtggttattcaggagaatccggttactcaggtatatctggtttctctggtgattcaggtataagtggcttctcgggtgattcaggtatcagtggtttctctggtgttgatggcgtatcaggttttagtggttactcaggcattgacggtgcatctggcttctcagg
		gcagaaggtgctctctttgcctgctgttgatgcctatgatgtggctgatgaagtgctctcttttaataatgttacggtgaagtatggcgcatgtactattctgaacaatatcacatggcgcgtcaacagtggcgatgtgtggctgctgaaaggtgccaacggctcgggtaaatcgaccctgctcagccttgtctgtgccgataatctgcaatcctatg
		ggctgattaccgctacgccagaccggaccaggagatcccgatgaagggtgacgcgaacgtcgtcgcgctgttgaacgatgtcctcacgaacgagctcacggccatcaaccaatacttcctgcacgcgcgcatctgcgagaactgggggtatgagcggctctggaagaagatccgcgccgagtcgatcgacgagatgaagcacgcggacggagtgatcgagcgaattctcttcctggaggggctcccg
		tgtatcggtcaggtgatttggcgcgtaaaaggtctgacggcgcgattgaatatctcggccgagtcgatgatcaggtgaagattcgcggttttcgcatcgaattaggcgaaatcgaggccgcactactttcaacttcacctgaaatcagccaagctgccgtgatcgcgacctcgcgtgattcggaagcccgcttggtagcttatttggtcgcgtatgccacacacctcatgcctgacatcgcg
		cgcaagacagtgttttatcttctcaaacttattgcgtttaagtattctgtcaaactgtatcccgcagtctataagtatgtcgtccagagtgtatgcgttacctttgcttcctgatgctaaaactctcatattatatcctaatcatcaaaggggtcttttcttcgacaggtgcttccggctgtgtttctgccggtgcttccacta
		cgttaagcattgcttttgccgacttgctgtgatcgccgtgaaaactggagcataggcaagtggccaaggcgctagttttgaaagccaacgccttgtacaccatctgcaaaggtactccacaatccagcatcaggatgcttccggtcttgtctgttaaggtataggcatttcccctagatccggttgagtgtactgtcagttgcatcgccgttctcctatttcaacacatcgggcatttcgatctg
		atcccgatggagccggtgcccagcatcaccggcacggcgatgctcgtgaaaggcgcgccgaaccctcattccgcgatgctgttcctcgatttcctgcaatcgaaggaagggcagtctctgctggagaaggccgattacttccccgtgcatccccaggtcgagatcaatcctaagctcgacgcggttgtgccgcgcaaagccggcttgaaagagaactttatcacgccgaaggagctcgacgaatacagcg
		gtaataccaatctcttgacgtacgcgtgcaattaaaacgcattgccaataaggagtgtccccccagcgcaaagaagctatcgtctacaccgacagtagcaacaccgagtaattcactaaagagagcgcataagagttgttcattagcgctacttggtgcgcggtaagcggtatcagtaacaaactctggctcaggtagtgcacgacgatcgagcttgccattagggggtgagtggcaaggtagtcagatag
		gatcgcccatgctcaaccaagctctgtagataccagtggtcatggtctgtacaccaaaataagacatggcaccgtaatcagccacggcttccatcaatgccaaagcaacgcctgccatggtcgctggtcttgccatcggcaaagccacttgccaaaacgctccccaaggtccagcacccagtgttcgtgctgcttcaattaatcgaggactgcgctctaaaaaagctgtgcgacataaaag
		atggcgctgtgtagaaatggaatatactcgaagttcattccgtaaattccggtgattaaattcagaggaagaataatcgttgcaat
	Pathogenicity Isalnds	cccataagtcatacgttgtccatcccaaaatgcatttacaaaattggtgttgtaatgaacataacttaacattttgttatccattgtcgtcaatgctgtttctattgtgctcttgcagaaagtaatcataggttgcttcagcgccaaaatgtgcgtctgtagcagcttgatcagtggttgtaatcgtccaactattaactgtattcgtaaaatcagt
		caacagcaacgacatagggattgtcgtgcgctccaccatacttgtgcatccagccatcgagccgagggactttatcccactcgagggtgttcaaccagtcaacgacaggatggaacttgtggttgcgggcctcatcaatcaacacgacgtcgaagaagtcagcgatggggcggaagcgaaacttctcgtcgatctctaaccacagtcggttgcgtgaatgatcgtcgagcacgaccgcgtgct
		aattagatgttgtagaaggtatgcagtttgatcgtggatatctttcaccgtactttatcaatacagacaaacaaacatcagtgttggaaaatccttttgtgttgttgtgtgacaaaaagatcagcaacattcgtgacttgttgccggttcttgaatcagtaaccaaagctggcaaacctttgttgatcgtatgtgatgatttggaagcagaagccatggccacatt
		gctattgttactatggcgtttgtgctcaggattgtggtggccaccgacacggcgttcttcaatgcgttctttgtcacctttaatgggtcaatcacccccat
		tattttcatatttatcttctctagcattataaccaaagtcatctttacctgcttttacagcattgataaccacagaaccttctccaccagcattagccacgatagttctcaatggagattctacggcttgacggataatattaattccagtagtctgatcttcattttcacctttaaggttatctaaagaactaattgcacgaattaaagcaactccaccaccagc
		aatcttacaattacacactcagtagtaaataaagcaatagctgctccaatcgcgttctggatagtggatttaattactaatgtagggtccacaatattgttatcgataacagattggtaatgatcttcctcgtctacaaacccgttagagttctcaagtagagcgtttataacctcatctaacgaatcagccaatacatcattagcctctgatttatgcttatctctcaagtaagtagctagagat
		aagcggcttccatgtacatctggacggcgctggcaggtcgcgtgatggttccagggatacaggccgatatgacccctgttctcgttggccatcaaggtttgcgtaagacgagcggcattaaggcgatggctccacaccgtgagtatttcaccgaagtgtcgtttggcgagaaggaagatgacttggcgcgtaagatgcgcgggtcgcttgtgtgcgagattgctgagcttcgtgggcttcgtag
		ggcttaaaggtgagcactgtcattcctccatcatttggctacaagcgtcaccagattatgcaggacatagcaattgcgacaggggctaagtatttctctgagcagacaggtgacaacttaatgatggtcacaattgacgactgcggacaagcaggcaaggtggtgagcggtcggttcaacaccattatcttcgatgcagtaggagagggtgaggagagggtgc
		catgtcctgctgtttggtaataaaatgcttcacagcttcaatgtccgctttgcgaagtcctgcaagttctgccatttcaattatccacgcgccttgaatctgttctaaaagcctctttaccgtgtacagtcataaacgtatcggaaaaccagctcttacctaagatgttaaagaacgttgatttagatgagccttgcgccgtgtcgacaagt
		ggagagtgatgaagcgctaggcataggctttgtgctgaatggggatgggttggtagggattgatatagaccactgcattgatgagggagcaatcgacaatgctgccattgagttgctggatcagctaaattgtacgtacatcagcatcagtcccagcgggaacggtctaagggctttcggctattcaacgcctttgctgcaaggagtcaaagggctatacaacggattaaag
		cacgaacccggaacggatggaggtcgtactcgagaaccccgtcattctcctttttgaaaagaagctctcggtcatgcgagatcttattcccatgttggaacaagtggcacgcgatggaaggcagcttctgatcatcgcggaggacatcgaaggcgaagcgcttgccaccctcgttgtcaacaagctcc
	Post-Translational Modification	gttctgattatgatacaaaagatggtacatgtgtccgtgattatatccatgtggtagatcttgcttcagctattgaagttgcaatagcaactggtcctaaaaatacaccatatgaatgtattggatctggtaaaggttatactgttaaagaagttattgaaactatgaaaaatgtttcagcatcaaactttgaagttaagatggtaggtcgccgagaaggagatcct
		agggtgccctcctatagctttccaagctgattttctaaatacaataccagaattacctatccaaccaacttgttcaattcctgtaatatgacacaacactcctgtttcccaatgaataatgtttacatcatcagtcatgtatttagctacattctgtagatgattagggagagctacatcatcatcatcccattgacaaattatctctccttgacataattcagtggcatagttttccttttct
		tagtttggaaggggctcagtcttttactgaccaactgggtggaagatttttatgaagctccaaagcgccgaaaacagtcggttggcatggccccggccggcgttttaaccccactccacccattctgcgaatgccgtcgggcaacgtggtcgcctgcgttggctgaaagacgcgccgtagcttgctgtgatctgaaaaggcgtgcactacctcgtttcggggcgggagatatgtcacacgcggcgtaact
	Prophage/Transposon	aatatgcgggccggtaatagaacaattaaccccgatgatatccccctcgtatatctcccggccgttcttgtccttaaggcccgtatactgctctaagataattcgctcctcgtgccttttgacgatttccccgaaagataatattatttctgaatcgcttaagctccaatactcatcgccaccgtatagcaaatccggaac
		ttgttacgcagcagagtaaaagctaatcaggttataaatgatttcaagataaatgaagctaaaggatccgagaagatacaatataagtcaggtgcagaaacattgttttccggacttgatgatgttgaaaaattgaagtctatattcgacatttcttccatctgggcagaggaagcagaccaaatacttgaggaagatataagcgagttggacagaaggct
		tacaaaacaacaattgatcacgcattaaattgctttgctcaatatgaagatatcactgatcaattttgggtcagtttaccaattgatttacgcaatgcagtaagtgtttacgaaccgaaatggcaatgctgggacgcttacaaaaaagatatttggattaggacgccaccaagttttgcaataacagataatgactatttt
		tagataatcgtaaatctaatctaagaattgttacaaatagacaaaaccttcaaaatcttactaacaggaataaatcgagcaaatatcctggagtatcttgggataaacgcagaaataaatgggtatctaacattagtattaatggaaaaactaaatatttgggttattttgaaaatgaaagagatggtgctaaagcttatgaaaaagcttgtagggaattagtaggggaagaattaata
		cgtatgtgccatttttatccttatctatcaacaagactatatcaagggctaatccataattatgatacgattgccctcctttggcctttgtaacaatggctcccggctttgttctgccttgagcatacaatgcatcctgctctgcaaatgttcgtaatgtatatgaaaatctgcaagctgcattgcctgacaatgctttctctatttcatcatacgcctcaaaagcat
		ccgcagacatcaaaaaagcggtaacatatgctaagtccctaggctttgagtggggtggagattggaagtctttcgtagataagccacacttacagttcaatcataaaggctatggcactgatacgtttggtaaactagagcaatcagctaaaatacaagttacaatggtagtagaaga
		cattacttcatcctaagttacgagatgaagcattagaaatataccatcagatagtattagcgttagttggtagggcaatgtgcaggttctcctttacattaagaacatttgcagaacaagatggcatatacgctcaaggtagaacaaagccgggccctattgtaactaaagcagcagctggattaagttatcataattatggactagcaatagacatagtactaatagtagatggcaaaactgcaag
		cggaacgccttttgtgtatccttcgacatgatctggccttgctcgatcattttacgaatctggccaacattcacgccatacattttagacagctcacccaggatcggcacgcctgcgttaataagctgatttacgtcttgcatgtttagcttgccagcggccatagactgcgaatacgcaagcgcgatgctatttaatttctgcgcgtttccgcctgcaaggtcgcctaacattttcatttg
		atgatggcattacgtttgaagagcttgctccattatttcatcagtattattcagatggtaaatcgtgcgctaattttatgggtataagatcgcaagagagccttaatagatatcgcgctatttcaaaagatagtgtgcatacttttaacaacaagtgttatacaacaaaggtgcacgaaaactgctggaatatttatcctatttacgactggaaagccgatgatatatgggtgtataattac
		cattccaatctttagcccaagactccagtgatcttatactttgtcctcttctacattctactagagttccttttattaaaaccttagcgtcattatggttcaccgtcaaaatgatgtcaatccaccacttcaggcgattgtcagacttccaaagccagtgatcctttatttgtcga
		ggtttaggtgaatgggtaggtaatgagaaagctatctttgaattcaatacggtagaatggatgcctgatgaagctgaattcgtttgttttggtttggactttggatactctgctgacccaactgctttgtgtagtatatggaagatgaacaatgagctttacttcttagagcattgctatgagaaaggtatgacaacatcggacattgattctatgttaagtaaggtagtagatggtagacaagagatatggg
		ccagttaactacgttagatgggtccctatcgaaaagtccatgctaacgactataacccgaattctgttgctaaaaatgaaatgcggcttctttacgttagtattcttcacgatggctatactcagcctgtagtcacggtttacgatgaaaaaac
		ctctgcctgaaggagtggaagtgagcaagttcgtcttcggcaaacgtagcgagaacaatctcctaggggtgcatcccgacctcgtgcgtgtcgcacgtcgtgcgctggagcttagcgaagtggacttcacggtcatcgaaggccgcaggacgccggatcggcaacgtgcgttggttgcggcaggggcgtcatggacgatgaactctcgccatctgacggggcatgcgatcgatgtcgct
		caagtcataacagataacagcgtcaaactttccggctagtaagtcctcgaccattcgctcatattccggacgctttacagactttttagaggcagagattgagttgtctgcgtatacctcagtaacgtcccagcccttagcctgggcaattgcctcacagtcttggcgctgacgttcaatagccaagccctcgcctgactgatccagacttattcttagatagattgctgccttgcgctgagtg
		gaacccttgccagtgccaccgtgtttagtaacaacatctttaaatttgcagccgcaggatgttgtattttttgtaaccaaacaccccgatggaacattaacttctttaccacacttgcataaacaattccaaagaactttttttgatgcgttcgttccagatctgcctataactgttagcctaccaaaaacttgtcccgttctgtctataaattttggcata
		taccccatactggtttaccgttacgcaatggtactatatcaaacgcgcaccgccagttgtgccagctttgtcctgctttagcattagtaacaacattacctggcttagtcctgccttgtgcatatagcgcattttggctttcagcatcacgataa
		acgtcgtaggcgagacgatagttgtgcatggactggccgccgcgcgccctggtgacgatgcgccccggagccgtgcgcccctgcgcgtagagccggttctgctcctcgtggtcgcggtaggtgcaggtgatcagcaggtcgatgccctcggcctcgcaggcggctttgtgggcccgacacttaacctcgacgagggggtgcaggtcttcgatcttgcggctggagatcacttgtc
		tcatggcgttcagccgaacgtcccacgcgccgccccatcggatctgaacgccctcggcaattgccgccgcgcgcatggcttctgcgatggtaaaaaagggcggccagtcccatgaaaccttgccgccgatgagcggggccaagtcaattgcgtggccggtcaggtgccgggaattaagcgtctgcgaagcgccagccgccacaagctgcttttgccgggcaagcgtccgcagcccttccgtg
		tgagtacgaatgactcgtagacagttccgcctgattgaattgcgctagcaatctcaccaagagtatcaagtgtagaaggtgctgagttaactaggtctgcgaccttagtatctacatacaacttagtcgcagcatctgcatcagaagttggtgtaccaagagttgtaatcttctgactgttcattgagatagcagcagcagggtcagcaaactcatcaagagtgta
		ctgctcaatctttgtatcgattacatccggaagaataaattaagccgtaaaatcggtgtgtttcatatcgattatgaagcgcaataccaaatgaccaccgattatgtggatagtgaactttcaaaaaactcagatatcattgatgtttatcgtatctgccttcccattcgctccttctgtgctaccagcatgcaccaaagctactggatcccatgggagaaatcaaaaaaggatatatgggtacgtc
		tgcttgtgaagcgcaagatatagatatattaatcacaagcacttatgtgatgctgaaagccaaaatgcgctatatgcacaaggcaggactaagccaggtagtgttgttactaatgctaaagcaggtcaaagctggcacaattggcggtgcgcgtttgacgtagtaccattgcgtaacggtaaaccagtatggggaactcaaggcaaagacttagagctatggaataaagttggtgctattggtg
		taaaaaccctaaatactggaccatttacggcaagggtgagtttgcacctaatgagaaagcaatatttaagtttgatatatgtgatgagtttgatgcagagtttgtaggatttggtattgactttggtttctcacaagaccctactgcgttagttgctgtttataaatcagctaatagattgtatttggaagaacttatatatgaaaagggattagtaacgaatgatattgtagagaaattaaaaaag
		aggtcttcgggggttcatatgagaagctgacgcccaggaccagcgatatgattcgtgaggacctggcggcgtgtggggtcgcttatcgggatggcgccggccgattccgagacttccatgcactccgacattcatgcggatccttccttgccgccatgggcgtgcacccgaaggtaatccaaaccattatgcggcacggagacatcaacctcacgatgtccaggtacacgcatgt
		agtagcttgcagatgcgccagctctttgaatgtcttccagcggccagcccattcaaggccgacgctttcgccaagctcaccgagacgcttaaaagtcctggcgtcattccacatcgccttgccattgacgattggcacgaaatcaaatgcgagccgataattgtgccaggactgtccagccttggcgtttgtgactaccttgccaggagtagtccttccctgagc
		cattgcagatgggcgtattcacgaaacgatttccaatcaccagcccaatcaagacccagacgcttgccgatagcgccagcgcgcttgaatgtagcaatgtcattccactgcgccttaccattcacgataggcacaaaatcaaatgccaatttataattatggaatgagctaccggctctggcgttagtgactatcttgccaggttttgttctgccttgagcgtaaagcgcatt
		gtttgcggactaaagaacagcagaaggtcttggtcgccacgggcaaaagccggacgatgaagtcaaggcaccttactggcgacgccgttgatattgcggtcctagtaaacggcgaagtaagttgggatctgaagtattacaaagaggtcgcaacccatgttaaaaagatggcgaaaaccctcggaatacgtgttacttggggtggcgattggtctggttttattgacggtcctcatttccagc
		tggcacccccacttgcttggctgcttccttcatcgccgcagcgatcttgtgatagagcggccaatcccatcgcacttcatcgtcaacccacgcgcccagatcaacagcgtggccggtcaaatggcgcgagttcatggtctggctggcaccggcttgcacaagcgccctctgacgttctggcgtcctgagtccttcaagcacagtgaaatctacggtggtcagttgaatggcctt
		atctctctggcacgtttaaatgcgcgagcgtcgttccacatcgctttcccattaacgattggcacaaaatcaaacgccagtctgtaattgtgaaatgattgaccgcccttggcatatgttacgatgcgaccaggcttggtccgcccttgagcatagatggcgttttggctttcattgtcgcggtatgtgctcgttataagaatatctatgccagcctttttacaggcggctataaaagccctagcctttgccg
		gaagcaagcagcacatggccgtggtcaaaagccacggctgttgcatttgtaagaaccccgttgctgacgcgcaccatctgaggatcttgggccacaagaggggcatgagcgtgaagaacggagatgacttcacaatcccattgtgccgcagacatcacgatgaactccacgcaatgggggacaggaactttttttgctttacatggtatcgaccccgtgctaattattcgtcagatgaacggc
		atcagcttgcgtttaataataaattcgggtgtagacttaccgcccttaacatcttcaactatcaagttgccattctcgatatattcaaaatcagcaagataatgacaggctcgttccatctttccgtctgatcttttttgttttggtatcagttcatatttagactgcagcttgagttgtgatataacgccagcattgcttaatacatgtaactctacataacgcttggcttctgctttactggc
		gtgaaatttagagtgtacagcggaaagtcccagctaacaacaccgtttggcagagctacaaagtcaatagcatgcccagtaatatgccgtgatcgcatggttttgctggcccccttcttcaccagatgggcttgacgctccttagtgcgcagtccctccgtgatacgaaagtcaatcggcgtatattcaatcgccttcttgactaccttcaccagatcagggtgaacacccttcaagcggtct
		aatatgcgggccggtaatagaacaattaaccccgatgatatccccctcgtatatctcccggccgttcttgtccttaaggcccgtatactgctctaagataattcgctcctcgtgccttttgacgatttccccgaaagataatattatttctgaatcgcttaagctccaatactcatcgccaccgtatagcaaatccggaac
	Regulation of Virulence	gaatacctaaaaaggggcaggaggctattgtcgaagtcgacaaatataagctggttggcatcttgtccaacttgttgaacaatgccatgaaatttacccataagggtaccatcacttttggcaactcccttaaagacgaccaacttgtgttttatgtcagtgatacgggtattggcattccactagacagacaggatgctgttttccagcgatttgtacaggccga
		ctcatcaagtccagatcagggtggctgtcgatgttcggctcaaccgccgagacatcatagccggcgtcattcaatgaaagggcaatcgagagcgccggcgattcgcgcagatcatcaatatcaggcttaaatgccagccccaggcaaataatcttgggtt
	Resistance to Antibiotics & Toxic Compounds	ccttcgctaatttacgtcgaagattgtgcggtggaatatttgtagccataccaactgcaatacctgcagaaccattttac
		cgcgccgacattgttggttcgctcgaccgcgaaatacaaattaacgtggacatgtttaaaatgcaggtggccagcgtttcactatccgacattgaacgtgccattt
		catggccatcgccatcggcgccctcgtcgacgacgcgatcatcgacgtcgaaaacgtggtgcggcgcctgcgcgag
		gcgggagcagcccttccggaaggaatgcccgggtctgccatctgctgtaactcgccactgcttttagctccgggtagtatggcgcacgtgcttcccctgtcaaatgctgtgaggcgacaattgcctgggaagatgcacgtaacaatggattcttctgtatagctatttttatgcagtcttcgagtttcaattcgagttttcctggcggctgaccttctgcggcaaaagcgagtccggacaccagaatcgata
		gcctaacagccagcgacaacaacaagggttacaacgcccattcgccaacaaacgaccttggtgtaatcagtccgactgctgccatttcatccctgccgtattgtcccgaacaatcgatggatgccatcaggttcttctattacacagtaggcgaccgcctttggggtgaatttggatgctatgatgcttttaacccttcggaaagctggtgggccaa
		cggcgcgaagcgaggcgggcaggtgtttcaaaagccgctgccaagccttcttccaggtgaattcatccaggatttcgaagaagaccgggatcaccaccagggtcaacagcgtggaggtgatgatgccacccaccacggcgcagttgaagaaaaacatcatcagcggctggagtccgttgcaggtgctttctcacccgctgctggacgccaacagctccactgcctggtacttgctggccgatccgtcg
		agtgttcacgacgataataggaaaatcaatcgcgggaatgcggtcaatgcctatgcgttgataagaaataatgccgaataaaacaatcacgccggacag
		ggtgtctctgggtaaggtgtctctgggtaaggtgtctctgggtaaggagtctctgggtaaggtgtctctgtgtgaggtgtctcttggtaaggtgtctctagataaagtttctctggccataggtctacaacacctaggtatctttttgaagtgccttttcatgaagttgattcaaattgaacgatgggttgataaggcaccaggaagaacagatgacac
		cgtgggtgtttcctgtgttaatgctctgtccagtagtctgcgcctgataattcgccgggacgggaaaaagtatcttctggagtttgaaaagggg
		ccagcagttcgggcacaacgcctgctcctcagcagtgtccggcgtatcaacgaccacaccagcctcgatacgttgcttttcacgcaggctatcgagctgacgcaccaggcgcagagccgaggggttctgcgccagcgtaaaacgccagcaagccagacgaccggctggcgacaacagatccagcgtggcaatacccgcatgatcggttaatttgagtgtctgatcagtagaaagcgg
		caattccgatactatttcgtaaatcaaataagttaagggtgtcaattggtctgttgtcaatattaatttcaccttcgttaacatcatataatctggaaattaaagataaaatacttgattttcctgaaccagtctttcctaaaatagctaaagtctctcctttatttacagtaaacgaaatgttttgaatggcattgatattggtatcttcataggtaaaacttacgttattaaacacaatgcttcct
		gcttgtaggtgtcttgccagcgtttgacctcctccggtcctttggcgcgcgcggcatcaatcacggcggcccggtcgctggaactcaaccaagccaaaatttgacctgtcttcacacggtccccctcgtccaccaacagttcttccatccgtccggaaatgggcggcttaatttcaacccggttcaaaggcgccacttcacccgtggcttccactgtctgttcgatgggccccatttccacaag
		aacgaacagctcgaaagcgaccgctacacgcactaccacacccaacaactcgaagccgcacacatgacccaagtcagccttgcgaagcttaacaccggccaacaactcatatataacaccggcttcggtcttaatttgctactgggagtctggcacatggctaatggcatgctgagtgtcggagacttggtgatgattcagactttattcctgcagctgcagacacctttgaattt
		gattaccctagattactaaccagtcagtcattaatttggatttacccatgtcaactcacgatctgcgccaactgaggccagccatgaccccaaacaatttcaacagtggtccttccttatggcttgtttgcgccatgtcttcagtgatgctgttgagtgcctgcagtcccaaaaaagacgcgcccgaaccagttcgctccgtcaagttgtccacagtgggtgaatctgatttgaa
		tccttggctgcgtccccttggctatcgccacgggttccggttccatctcgcgccagaccatgggcaccgccgtcatcggcggcatgggcgccgccaccctcttcgccatcttcatcatcccgatgctcttctacgtcgtggaaaaattgtccggctcgaaaccgggcgaaaccaagaccggcacggccaagtaggcgcagcgcga
		cgacgagcgtcaccaacgggtcgccattcgacagatactcagtcacacatcggggatgcccgacatggcggatgacgaatatgacaaattcctgttgcaccccgaatgggatgaaggagccgccgaacgttacacccgcagcctgatcaataaaaaactgatagcgaatcctggcgaacggtttgcctacagcaacatcgcctacaacgtattgggagatgtgattgccaaagtatcaggcaagt
		taataactaaaccccctaacacacccataagatccgcatagatggttaggatcggcatcatcatgactaatgccagaacacgcggaataaccagaaattcgacaggagagacacctaatgtttttaaacgcatcgatctcctcgtttgtttgcatcatccctaactccgccgcaaaagacgctccgatgcggcccgacacaataatccctgtcattactgctgacaagacacgcaccatagcgattccaacga
		gaaagccgtctacagcaacctgaactacatggtggtgggcgcagtgatcgaggcggtttcgggccaggcttacgaaagttatatcagcgaaaatatcctgcaaccgttgggcatgacgcaaactggatttgtctattccgcctcgatggccgaacacgaatctgttgggacgttgccggtggttcatttttacacactcatgatgcctgccttgctcgatacaaacactgtcatccgtgagcgtcagggc
		cgcgaggatcgcaatgacgcataacacaccgccgatataccagacataattcgggttgaagttatcaaagatcaatcctgccgcccagggaccgatcatcgaagggacagtccatgtcagcccgaagaccgccatgtagcgcgcgcgcatctcctcaggcgcaaatgccgcagcaaggacgttgcttgtcggcatg
		cggcgtggctggtgatagacggcgcggcgcagcgcgggtttcgcctgccgcgcacggcagtcgtgcaatacgaaaacgacctgtttgttttcgtgcaaacgggcgacacggtgttcgagcgcaagcgcattgaggctgccaaatctcagcgtgatggagttttcgttaccagcggcgtggcggcggacgaccgcgtcgtcatgaccggcgcacaacagttgtt
		acaatattgcttatgaagaggggcaaatggtaaacaaggatgatcttctttttcagttagatcctgaacagtaccaagcaaggatagagcaggcaaagggagaagtttctagacaggaagcagttgtggagaatgcccaacttacagtcaaacggttactcccactatatcaacaaaatgcggcgagtaaaaaagatctggataatgcgatcgcgtctcaactttctgcggaagcagct
		agtttgaccgataacacaaaatggcattgttcccaaacgtcttctggcgcgatttttacccctcgtggcaataaatcccgaatgtcgcaaaattctcggattgcctccgttaaacctgcgcgcaaaccattgacgtgcgtaccgccttgcgcggttggaacaagattgacataactttcagcgacc
		cattgcatcttgggactggttttatgaatgcaccgccgcccccgagcaacaagttggagaagactctggtttccgcagtctccgagctgaaggtggaagggatgacctgcaacaactgcgcgcgtcatgtgacggaggccattcaaagtgtgcccggcgtccgtcatgcgtcggttacgctcaccgcaaaccacgcgtctgtgcggtggcaaccgggtgtcgcagagaacataaccg
		aagcgctacggggcggtggagccggagcgcacttccacaaaccgccgcttgtactctgatgagcagatcgagcgcctgatcctgttgcgcgagctcacccggatggggcagagcatcggttacgtggcgaagctgccgacagaaacgctcaagcagcttgcggtggcatcccctgcgagcgtt
		cccggcgtctggttgcccgatgatgtcgcccgcaaattccccgttacggcgaggaatggccctggcagttcttgtttccgggtgccaatctctcccgcgatcccgacaccggcatcatccgtcgtcatcatctccatgaggacaccctcgccaagtcactcaagaaagccgccatcaaagcccgcctcggcaagcgcatcactgtccacaccctgcgacacagcttc
		tcatgcaaagtatcatcaaagtttaattgaaaatcaacagtttccttatcgatatcggccaacatttcttccgaaatctttttcattctcgcttcggtgtaacgcattgctgctggactatcaccatctaccgaaccaaagttaccttgaccatccaccattaagtaacgtaaactccattcttgagcc
		cgtccgattcgctgcgcatcgatcccgctacccagaagatttacggcattcagttggcctcggtggaaagcgattcgggcgcgcgcaccattcgcgtgtttggcaaagtggctgcggacgagaccagaatctacaaggtcagcgtgggcgccgacggctacgtcaagtcgaccgacgaagacgcggtcggaaaccgcgtaaagaagaatcagcacctcgccgtaatctactcgccggacttcctggccgt
		gtcgatgcggatccgagcacactggtcatcgtgagcgatttcattacgttgttgagcagtcgctcgacgccgactccaaatacgctggcctcacgctcttccgcatgatagcccttgatcacgcggactccgccgagcgattcggtcagccggccagtaacttcggcattga
		ccgcaacctccaggcgctggtgcgggaaggcgcctttcgcgacgatctgttctaccgcctcaacgtggtcaaaatcagcctgccgccgttgcgggaacgcaaggaggacgtccccctgctgatcgatcatttcatcaagaagtacagcgcccagcaaggcaaggacattgtcggcatctccagcggcgccctgaccattctcatgcgctacgactaccccggcaacatccgcgagctggaaaacntcg
		cggctcatcaagcattattatttccttatctttagatgcgagaagtcccctacaaagtgcaagacgctgtttttctccacctgacagattaactcctttttcttttatgctggactccaatttatttggcaatctttctattacttctgtgaatcttgcaatatcagaatatttccttaactcttcatcagtacaatctatccccatagttatattttctcgtatagttgatgtgaataattca
		ctgaagtgctcatttttggagacttcatcaaagcaatcgctgcgctagctacttcacgtaagttatgtgaaggaatctctgtcgccatacctaccgcaataccagatgcgccattcaggagaacaaatggcaagcgtgctggtaacaactttggttcctggaaagatccgtcgtagtttggcgcaaagtcaaccgtaccttcatcaatctcactcagtaagagaccagcaattttggttaaacgcgcttcgg
		gtgctcgcgcttcttctcgccgccgtcggcatttatggagtgatgtcttacgtggttgcgggacggacgcgcgagatcgggttgcggatggcgctcggcgcgcaaagcggcgacgtccttcgcttgatcctgcgccagggaatgttgctcgccatcatcggcacggcgctcggactaacgattggttttggtggcacgcggctcctcaagactttgctttatggagtgagtgcggctgatccga
		gttcctgcctttagcgttggcaatcggcttttcaatgatcacttcttatttcatggcgcaaacattggtaccggtcttatccaactggatgatgaaagatcctaacaaaaggaaggataaaaaaggaaatggtcttttcaaaaagaaaagcacggaagatga
		atactgatcgccgacgaaccgaccgcccatctggacagcggactctcaaacgaattcatgaccattatgggtgatctgaagtcgcggggcatgaccatcattctggccagccatgatcccataatctgcggttccgctctggctgaccgtgtcgtggagatgcgt
		ggcggctatgcgttataccgaagccaggatggcttccatagcggacgatatgctcggcgatatcgagaaggataccgtgaatttcgggcccaatttcgacgcctcgctcaaggaacctttgttgcttccgtcggcgctgccgaatcttttagtgaacggttccagcggcatcgcggtaggcatggcgaccaatattccgtcgcataatttgaatgaagtcgcggacgcgatcatctatctgatggataattcc
		tcgccattctgcaactgatcgaaatggggaagttgaagctcgatgaccgtgtgtttagcattcttaccgaggacgaaccgctgctgatcggcggcgcaaaacccgacgagcggcaacaggaaatcacgatcaggcacctattggaacaccgcggcggctgggaccgggagaagtcgttcgacgcga
		caaagatgaccgaggtcggtaatgacaagtaatgggtctgactgatctgcacggatttcacgtccgggattgatattggcggaagcaataacaccagaaatgggcgcacgtaaggtgaggcgttcgctttcaggatcaggtttgccatatggcaccagattggcaattcgcaaataggcacgacgcgcctcggcgtcagctatgcggaaatcgctctcggccacttcgaaatcccgcttgg
		gattgtgctgctcggtgatcatcgcctcgagcgtgggccgcctcatcagcgtgacgccgtcgatgccgtcacgcgaaccaagcgccccgtagatccgcgcgacgccgcgcgcgttgccgtggccgctgccgctcgcgacctcgaccgtgcgccactcgggtctgttgagcgtgacggcccaaggctctgccgggttctgcttgaacgcgagcgctcgcagga
		cgtccttatccagaccaccaacataaacaatggcgatgctgcccttgttccagcctttgacatgggagccaatggcggtgtctgggcgacccttttcgacccgaccatccagtcgcactacatagtgatagccaatgtccgaccaaccctgcttcagatgccaacctttgatggtggccgcgcttacatcctggccctcacgggttgcggtgcagtggaccac
		ccccaatccgttgctatcttcacgcgcgtttctggcttccttgagaaacagacctatcaggaaggctcctgggttaatgccggtgacattttgttcgaaatggataagcgcccattcgttgcgcagcttgatgctgcgaaggctgccatggtttcgcaagaggcttccctaaggacagcgacgttaacactcaaccggatcaagcccctggctgccgctaaagcgctatcgcagcaggatctggataccg
		ccgacgcctgcattcaggatcactgcgcagatgaaattaactataagcccgataccggcgatcaaaagcgcctgattatactggattgccagcggatggagcagtcgttccaccgatgtatagaccatcatgaacccgaccacgccgaggattagcgcgcttgtataggcaccgaggatctctatcttccatgtgccgaatgcaaaacttttgctggaggcgtgtttcctcgcc
		ggtgatggcgatcagggcagagcccatcatggagaaggtcttggtgaaggccagcgggtggaagagtttgccctcctgcccttcgagcataaagaccggcacgaaggagagcacgatgatggccagggagaagaagatcgcccgaccgacctgcttggcggaagttataacgacttccagacgttttccggcgcgctcttccggtggcatctccgacagatggcgatagcagttctccaccatgatgaccg
		caaggtgctggaaatcagcgtcgccgcaggtgaatatcgcaatgacaccagcgcaccgttgatgacgattgcggatctttcgaccgtgtacatggcagccgacgtgccggaaagccagattcggctcgttaccaaaggggagcgcgtcgaaatcatcctcagtgc
		gcctacgaagtggacttctttggccgcgtccgcagcttgaaccagcaggcgctggaaaagtttctggcgacagccgagggcaagcgcagcgcgcagattgcgctcgttagtgaagtggcctcccaatacttcacgctccgccaggcgcagacgcagcatgaactcgcgcggcagacgctggcggccgttcaagaatcccacgcgctcaaccaggccactttcgaggcgggcgagagcattg
		aggtcctggcccagattgatgataagcagtaccgtagtcagctggaagggcttgaaagtcagtatcagtttgcagttgaactgtatgataagcagaaacgtttgtgggatcagaagatcggaagtgaagttcagtaccttcagtcaaaaacaacaaaggagtcgctcgaccgccagatatcatctcttaagcagcagattgaaaatttagatcaaatcacctattgatggtacaattgaagagtg
		gattctatcacctgctcaagtggaaccatttttccttttccattaaaaacgggcaatgtattcaggttcgaaaggttaaactggtcgatgttctcttcctttaaaagaattggcataaaaatatcaccttcgcggtattcgcccattgccaggccattggttgccagctttatggaattggccatcgactgacgcgtgattccaagacgttgacccttttcctgcgaataatcgggaatccatacc
		tgtattttgccagacaacaagtagcagaaagaatacagcaagttaaatcacaattgccaaacggactgtcaccagaaatggggccaattgcaacaggtcttggtgaaatatttatgtataccgtcaaatcttcaccaaactcaatgaagaagatggcacaccttggaactcaactgacttgagaacattacaagactgggta
		aaatctttttcttttttactaataaaaaagaaattaaataagaaattaaaatgatgactgaaattggaaaagttagataattattcataatttataattgattttaatggtttttactttttttgtaaggtatctcttattattatcccatctctaagttcgatattccgctgggctaatttggcataatctaattcatgagtagccataataattgtttgaccctgcttatgtaaatttaagaaaa
		atgctccaagccaatgccggacaatctcctgctgaacttcatcaggcaatgaataagatgctgatgcggctcaatacgcagtataaagacaagatccttatggcgttcggcagctttgagaccggtactccggaattgttcctggatattgaccgggaaaaagccgaagctctcggtgtgccggtcagccggatatttgaagtgcttgctggaaacgttgcatctgaatatgttaacgactt
		ctggtgggcactgaactgaacctagtagaacgcttagcccgagaagtcgcacccgaagggaagatcgtgcaattcatgtcacccacggtgtgcatgtgctcgaccatgcagcggattgatccacaacacctcgcctggacactggaaaacctggtggatggcaac
		cccgctgagcgacgtggccgacgtcgccatccgcaagatgcccgagatgctgcggaatgacaacggcctgctgtcaggttacatctacgtcgacattc
		cagtcatggccgcatcgtaatcggccttgcgcctgttgcgcagcgggacatgcccccacaggcatactcggcagcatggagcacgcacaccctacgcatcatggccacgaacatggccacgaacatgggcacgaccatggccaccaccacgcccccaccgacttcaaccgcgccttcgtgttcggcatcgtgctcaacaccggctttgtggccatcgaggcctggtacggttggcag
		acaccgtcatccgcgcgccatttgccggcatcgtcacttccaaggacgcgcagcccggcgagatgatttcgccgat
		cctcgatcgctttcatcgccggggtgttcccactcgtgaaatcgcacggcgcgggcgcggagatgcgccaggccatgggcatcgccgtgttctcgggcatgatcggcgtgacgctctttggcctgtttctcacgccggtattctatacgacgctgatgaagcttgggtcgaagaagag
		gttcccgataatgatcgccctgaccttgatcaccatcatcttccaggtccgctcgatcgccgcgatgctgatggtattcgccaccgcgccgctcggcctgatcggggttattcccaccttgctgatcttccagcagcctttcggcatcaacgcgctggtcggtctgatcgcgctatccggcatcctgatgcgcaacacgctgatcctgatcggtcagatccggagcaa
		tccttaagacgcatgacatgaacgcccacggcattgcggccggaagtgcggatctggctgacggggcaacgaacgaccattccgcttgtcgtcacgataatgatctcgtcttcctcggcaacggtcagaacgttgacaaccttgccgttcttttcggagactttaatgttgatgatgcctttgcctccgcgggactggatacggtattgcgcaaaaagagtctttttgccaaagccgttc
		catcgtaaaagccattttttacacaagagtatttccagactattgttgtctgcatttagcaagacgatagccttgacgtcatcgaccgtcgcaatcgccccttcggcccgcaccagcagtgcttcttcgccatcgttcaggcggccggcgccgtcgttgcggttgttggtctccagcaccgcctgcaaatccttcagggccaggccgcgcgccgccagcaactgcgggttgggcacgacttcgaaggtgcgg
		tatttcatggtagtttacgtgataacttagtgcttggagaatcaggattatcagatagtgaacttgttcactcacttgatcaactaggactgatgcatttactacaacgtgatagtttagggctagatcaacagatcgccattgatggagaaaacttatcagttggtgagaagcagttgattgcatttgcacgaattttattacgtcatcctgatcttgtcttgcttgacgaggc
		gcgcgatgcgcccgttgcgcgcgaccagcgtcaccgcgcccgagaagctcctcgcgtcgaggtggcgcttcaccagcgcgttcacctgctgcaaccgctccgacgacagccccacctcctcgggccgcgcagtggcgccggcgccggagagcgacccgacggacacgagacacacgagcgccaccagcgcccatcgcgtgagggaggaacgcgtcatctgcgacatgctgagct
		attcccgccacgagcgggagcgctacgtaaacgaggatcgagagcagcagcgaccgccagggtcaccgggagcctgcccatgcccaggagcaggccccccaaggcgccgtagagcacgagcatcgtgagcgagttgacggcgaccatcacgagcgtgtggccggcattgccccgggcgaggtggccccagacgagtaccatcgccgtgcatggcgctattccaagaaggatgcagccggccaggtag
		agtataaattcgtgctggaaaacgccaatccggcgctgttcgccgaatgggcgcccaagctgacgcagaagctccagcaattgcccgaactggccgacgtcgccagcgacatgcagcaacaaggcgcggcgctcgacgtgaccatcgaccgggcgacggccgcgcggtttggcgtgacgcccgcgacgatcgacaatgtgctctacgacctgttcggccagcgcatcatctcgaccatttac
		atccacctttccttgcaatcgtcctaaaagcgcattcaatcccaattcttcttctaacaaaagcatttctttattgagaagcatagattcgaattcaagcaattgtgcctcgaattgtttcacacctaattcgttcacgcgccctgcatctttctgaaatcctataatttctattgcggttttctgtaattcaatattcttctttatcgccttaatttctgcatccagagcgagcatccgatagtaggaagtcg
		cgaagggcgactcgccttcttcgatgtagcgggcgatgttttcaatcatcacgatcgcgtcgtcgacgacgaaaccggtggagat
		agctgtccagaaatgcggaattccaaggcattatgcctgtgcgcggtaagattcttaactgcttgaaggcagactacaataagattttcgcatcgcccat
		gacttgttgatgcaattcgcttttcttaagtctcaacatcccacgcagttcggccggtgacaagtcatcttccagcagatgggcaacctgctccaaagagaatcccaaatccttgagcgccagaatgcggtgcaggcgtggtaattggtcgagggtgtaataacgataaccagttagggcatccacctcaacgggctggagcagatccatatcatcataatggcgcaaggtttggacggtcacttgt
		aattggtttactgatgctcacacaaattactccagaaacttcctacgtcactcacgttctgccttcactattaatcatgtctagcggtatggcactcgttttcatcccgctatcaacaacttcacttcacggtgttggtaaccgtgatgcaggtgttgcaagtgcgcttcttaacaccagtcagcaagttggtggatctctaggaacagcgcttttaaacactgttgctgcaactgctgcaactt
		gatgtttcccggcaaaacttcggtttcaatcgcatccgcaaaaccggcgagcgcttcatcgaccgaattgtcgacaatttcccagaccagatgatgcaaaccgcgcggaccggtggtgccgatgtacatgcccgggcgtttttttaccgcttcgagtccttcgagaatttgaatattgctcgcatcataatgc
		cacgtccaggtcaggcccaaagattttgacagcgagatccgagcgcgttcccgcgatcaactcgttgaagcgcat
		gcaccatgcgccaccaatcctttcgccgttttggctttgccaccgccctgttgctgaccctgagcgcctgttcccgcggcccggagcccgattccaggcgcttggtgctggtgacccaggcgcaaccgagcggcacggcatcccagatctttgccggcgaagtccgtgcccgcgaggaagtcaatctgtcgttccgc
		ggcgcgcgatgtccgtggagcagccggtcctgacgcgccgcgagcgcctgcgggcccagaccgtcgacgagatcaagaccgtcgcccggcagcacctcgtcgcccacggcccgtccggggtccagctgcgcgccgtcgcccgcgacctgggcctgaccgcgccggctctttaccgctacttcgacagccacgaggccctgctggccgccctcgtcggtgacctctacggcgagctcgccgacgtcatcgagg
		gttctttatggttggttcttcactaaagattgcctccactttcttaacggaagccaggcattgcgccagtatgttggtaagccaacccatcattcgcattggccaaatcaacatgaaaatgtaattactaaacgcaaccagtgtaccaagtgtgatctctccatctatgacgaagtatcctccaaagcttataaccaataccagtaccac
		ccacgatgatcaccacgatcgacgataacagcgccctcgaggtgtatatccaggtgcccatcgatcgatcacccgatctgcgccttggcctcccggtacagatcctcgacgccgacggcaaggtcctggcgaccaatcccattaccttcgtggcgccgcgcgtagacgatgcgacgcagacggttttggttaagagcgcgcttcgcgaagtgccacc
		gagatcaaaccaccgataaccacaatggccagcggctgcgagatgaatccgccggagccggtgataccgacagccatagg
		tcgccttgcccatgcgggtggccagcagcacgtcgtcacttgcttcaagcagcgccacgccgatcagccggtcagctgaatcctcgtcaaagcgcatggcaaacttgccgttgctggggatgttggcaaaagcgtccatcgcattgcggcggacattgcccttggccgtcgcaaataccaccgacagcttgccccattccgcctcgtcctcgggcagcggcaggcac
		cggccgcgatcttgacgttggcgcgctgaatgagctcgctgatctcgagaggattgaggaagcgctcgttcagcttcttctcatccaggaagacctggaactgacgcttgcgcccgccggacacagtggtctcggagacatccgggatcgcactcacgaccgtctgcacatccgtgacgacccggcgcaagtgccggggatcggccttctcgccgtggaacgtgagcgccatgatcgg
		agtgtcactgtaggagagaacaatccccaaacgcgattcacgcgatcattaatttgtaggttgtgtttattggagtctacaaagcgtttgagttcacgatcttcttgtgcaaatgctttcacaacacgaatacctggaatcgtgtcagcaagaatgttagtcacttcggaccaaatacgatcaatcttttcaaaaccaaaacgtaggcgatcacgcaccacgtgaatcatccagacgatgaatggcaatggcg
		tgattgccgtccgaatccgcatcagcaagaatgcaaactttgccataacgcagattttccagattgtccgaatccggctcaatccctaacgccaccgcaatatcatgaacttcctgcgaagccatcacttgattggaatcgacttcccaggtattcaaaaatttttcccgcgtaacggcatgatggcttgaaattc
		agcacgtcacccaccacgcgcgctgacttgacaggcttggcaccagactgcaagcccattgactgcatggcgaacaaaatgcggcgctgcaccggtttttggccgtcacccacgtctggcagggcacgcccacgcacaaccgaaacggcataatccagataggcttgctcggcatagcgcgcaagcgtgaggttgtccccgtcttcctgttgctcgaacaagccgggttgtaaagtgtcagtca
		actcatccggttctgtcggcaaggcgcgggaagagaacaagcccatcgaagttgtcttcctccgcgagggcgacaccgtccgcgccatgcccgtcaaacgcggcatcagcgatgagaattacaccgaaatcatcgagggcctgagcgaggaccaggagattgtatcc
		tcacgaacgctcctgcaggtgacgctcacggacgcggcgattgcggacagcgttttctccacactgatgggcgaagacgtcggcgctcgccgaacgttcattcagcaaaacgcgaaagacgtgcgcttcctcgatatctagggggcgcaataaaaggacacggacatgacagaccagccaggggaacggatcgaacaagtcgatctgcagatggagatgcagcgttcgtatctcgatt
		gggcgccaagctcaggactacgtagtactggttgaggggctcgtagagcgttgaaacgatgcgttggccaaatgcgtcgttcaaggtcgcgtcgatctcgcgtgccgagatgccgaggccggcggcgacatcgcggtccacgatgacgcgggtggcaagtccgcgatcctggaagtcactcgtgacatcggctagctcgggcagcttggacaggagaccacgaaagcgtggagccaggcgttgcaggg
		cgtcatctcccagctcaccgcgcagcgcacccgcgacatcggtgtgcgcatcgcgctgggcgccagccaaggcgacatcatggggatgatcctccgcgagggcggctggctgctggtcaccggcctggccatcggcgtgcccgccttctacggactgaatttcctcctccagcgcgtcatgcccgagatgcatctgccgggcgtctggctgctggcgtcgacca
		gtttgcaggcccagatcctgctggtcggtattaacgtctgccaaaacgggtagtttggttaacgcagcccgaatcttgggctcccattcacgaagttcttccagatcgtcactctgcagtgaaaactgatattgcgcattcgatgggcggccg
		tagatgaacgactggttgggagtgaaagttaaagataaaggactcgttattttttactgcgtgttcgcatgcgggcatcattaacgtactgcatgatgcgagagatcggttccctgataccccgattcatgctgtcttcgggggctttcatttggtctggcgcaacgaagcgatcattcccgaacggtcga
		gagcaggtgcttctcatatagggcaagctcgatccataggtggtcgaggtcagtgacgcgataggcgacgacatccccctccacggtttggcctgggctaatgtgccgctcgaccaccactccggtcatcggagccaagaggtcgtacacgccgagtgcgcctttgccgcggccgccgccgagcgcctggaccttctgcactgcggcaccgagtaaggccgagtagcgcttgagct
		acaccaacaccacctcgtttttgagtgtgataggtttctttggcaactcgtttcatataaccagttttggttaaagcaactaaaacagcttcgttggggactaaatcttcttcgctaaattcttctaagcctcggacataaatttttggtttttctaacatcaccatattttttcgattatttcactattttcttttttaagaacagcagtcataacttctggtttggtgataatggcggttaattcgtcaatagtgtttaaaacatcttttaattcatcttcgagcttttggcgttcaag
		catagattattgctgtaatgtattcaattatgcagcaaatgatgttaaaaaaagaataagagattacattctaccttgtaaaaaacccaaatctttcagaatatctttggtaatatttagtcttacagatttcatgtctattacaagatctggtgatttcaccattgtaacaaagaaatatacatgcctgttttcttctatccagcctgcaatccagccgacattgttttttttctcgtcaaat
		ggattaaaaataaccaacaatgactgctgcaagtggatcaatccatggcattccaaactgtgaggcaataatacctacagctgcaccaagtgaaacccaagcatccgatagattgtccttagcggcagcgagtaaaccagcgctgttaatacgaagggcaatttttttattgtataaatagacaaaataaatgcctatggcgcaaacgattgcggtaaatgcagccaataaatcaggtgcttttgg
		tgtgggacttcatcatccgcggttgctcgttcatgggcaactccgtcgctcgtgcgacactggggtttatgcgggcgcggccgtcgcctcgggcttcctgggcgtcttcgccgcactgcgcgccatccgccattcctcgaaccggcgcaccaccacataaaacgacggcacgaacagcaccgcaaggcacgttgacgcaagcatgccgctgaacaccgcgataccctatcgaacggcgtgcttggcaccggcg
		gcgcgagaacatccgccagatttccgtccgcacgaacattcgcgggcgcgatcagggaagcttcgttcgcgaggcgc
		attgtcagcagcgtgccgatgccgcgcgtgccgagcaggaagccggctgtctggatcggatagccgagcaggttctgcataaacggggtcaccagcgccatggtgccgaacagaacgacgccgatcaccagcatgaagacgcagccgctgacgaaattgc
		ccacgctgattgagctcttcatggtgcttgggtatttcttttttgtgtataacctttggtttgtcatcattacgctcattgcgttgacttgttacatcgtgtttttacgattgttgtgactgaatggcggactaattttagacgacaaatgaatgatttggactctaaagccaatcagcgtgcagttgactcattgattaactttgagacggtgaagtatttt
		attttgggccaaattacgacggttagcgagaaagaacctactgattctagcctgccaaagtgcctaatttgctcataaacggacagttcttggcattgcagtgggtatggcgaccaatatccctccccataacctagatgaggtggttacagcctgtctgcacgtgcttcacaacccagaatgcacgattgatgagctcattgagatcattccagcccccgatttccccactgccggcagtcatttatggg
		cctggccttttttgacggaagcgccgggagcgacggcgagcatttcgagcatgccggcgaccggggcggctactacgcgcatctgttcgttgggcaccagcacgcgcgccggatagacgccttggcgctgctgatcggcctggccgacgagcgcggtttcgatgcccagcgcacgcatctgggaagcctgcagcaacagcggttcgccagcattggcaatgccggtgaacaagacgaccag
		agcttgcagagccgccacatcgacgacatggccggtggaagcgggccgatggcggcgtcggcggccacgctgcctcgatggactggcagatcagaggacgtcatacaccgtgccctcctcatcctcgcccgactcgaaccgctttgcctgcaggtcgaacattgtccggtagcggccgccaagaatcatcagttcgtcgtgcgttccgctttcgatcacgcgtccatgttccagaacgcag
		gcgggttcgggcggatggccgtgaccgacgagggtccgggcgtcgcggcggacgagcaggcggcgctcttccggaagttcagccggacgagcgcgacgccgacggggggcgaggcgtcccatgggttgggcctggcggtcgccaagcggctggcggagacgatgctgagacac
		gggattgttcaacatcttttggatttattgctaaagattccacctcttcgagtcccattgcatggaataaatttaactttgtttttctctcattattttttgatttttcgaactgaagttgagaatcagccatatcaacttcagctttacttacatcaagaataggtctggccccctgctcaaagagttgttttgcaagatcagacttcttttaaa
		atcgagcgcatcttcgtgcgcggccgcaatgacaccatgatcccgctggcctcgctggttaccgtgcgcgagtcggtggcgccgcgtgagctgaaccacttcagccagcgccgcgccgtcaccatcacggccaacctggcaccggactactcgctcgggcaggcgctcgatttcctggacgagctcggccggcgggtgctcaagccgggctacaccaccgacctgaacggcacttcgcgcgag
		ttgaacaggagaaaaatgttccttcgcttgctccgcttattaagattgcccgtgcactgggtgttcgtctgggtacatttctggatgacagcgattcgtatggacctgttgtcgtcaggtcgggagaatatcataaaggagtccggtttacttcacaggccagcgaagcccgtgagcacttgaatttcttttcacttgccttcgacaaggctggtagaaatatgg
		cggcatgattagcggttcgtttcgctgccatcgtagttagggccaaaatcaacggtttctttgtctatgtccgcc
		gtgctcctgcgcgaggcgctcgtgaatctcctgcagaatgccctggaattctcgccggacggcggcgaggtgaccttgacggtccgcgcgcaggacgggcgggtggagtttgtcgtggtcgatcacggtccgggcgtcccggattacgcgctgccgcaggtgttcgaccggttctattcgctgccgcggcccggcggttcgcgcaagagcaccggcctcgggctggcgctggtgcgcgaaatcgcgcatctg
		cattcacacaacttacccctacaccatgcaaaccaccagaaactttgtaggtattttatcaaatttaccacccgcatgcaaaacagtcattactacttccaatgcagattttttttctttagagtgcattgcagttggaataccacgaccattgtcttgcacactaattgaatta
		caccgacatggtggtgacgctttcacacagcggctacatcaagagccagcctttgtccgaataccgctcacaaaagcgcggtggccggggcaaacaagcggctgtgaccaaagaagacgattggatcgaccaactcttcatcgccaacacgcacgactatttgctgtgcttctccaaccggggccgcttgtattggctcaaagtctgggaagtgcctgccggctcacgcggctcacgcggccgccccatcg
		ttggcgcccatgtacgcgccgttatcaagctcccacccccattgccgcagaagcaccgatccggggcggcagcgcgttcgcatgcatcaaagcaacggtttccggattaaaatagcgcctgcccctccattcccctttgttcatgagcatcgagagaaatacaagcaggtccggcacagtcgagaataatcccgctgaaccggcgaccaccgttggccggagcgcccaggcgctctcatcatgc
		taccgcccacgatcacccacccgatctgctggcggctctctgcacccgcgccggtggaaatcgccagcggaacggcgcccagcaccatcgcccccgtggtcatgaggatggggcgcaggcgctgcgaagcggccttgaccagcgcgtcgaccatctccagcccctgctcgcgcagctggttggcaaactcgacgatcaggatgccgtgcttggtgatcagccccaccagcgtgat
		gaaagaggcctccgactaagtggtggagagaagcaaagagtcgcaattgcccgcgcattgctgaaacaaccctccattatgtgctttgacgaagccacctctgctctcgacaccaagactgagcgggaaatccaggctgcagtggagatggtctcgaggaaccgcactaccttgatgattgcacatcggctgtccactgtgaagcatgcggatcagatcctggtgatgaaggg
		cagactcaaaggtcagggtgatctgtacggtacccgtggagtcactgttagaggacatgtacatcaggttatcgataccgttcatattctgttcgataacctgtgtcaccgtgtcctgcactgttttcgcatcagcgccggggtaggaggcggagatcgttactgccggcggtgcaatcgtaggatattgcgccaccggcagtttgaggatcgccagcccccctgccaacatgatgataatggcg
		caggtgcagggacaggaagacgcagatgcggtcggtctcgctgccgatgcgcgccatcaggtcaccggtgcgcttgccgccgaagtattcgagcg
		ggaagtccctgtgttgtgattgattcagtcctgaactatgaccccaagtcaggaaggaccacaacgcgctcagctgatcaggtgattgaatatattcaatctaagcaattaaagcttgaatggattttagaaacccatgcccatgcagatcatttaactgcagcgccttatttacaagaaaaaattgggcggcaagctggtgatcggggatcacattgtgaatgtgcagaatgtctttaaaggcg
		gcacgaactgctgcgacctcaccttctgctcgaccaccttgccttgaaagggtgcagcgatcttgcacttgctcacgatcgcctcgagctcctgcacttcggcgcgcgcacgtgccagctccgagaacgagttctccgcctccacccggctcaccgtccccaggttcaagagccgctggttggtgctggcattccgctgggcaatggcaagtgtggcccgcacgcgtgcc
		gccgcgacgtcagcagcatggataacctggtcatttacagcccgacggcggataagatgattccggtgggccagatcacgtccgggatcaagaccgactacgaggatgcgaatatctggcgtcgcaaccgcacccggatgttgcgcattcatgcggacccaaaaacggaattagccagtgatatcttggcccgcatcaagccaagatcgaacaaccctgggcattgatgtagcgacagtcctgggcccgg
		tattttcgtgatgctcagcagagacgggtttaagcagcgttgcacataacgcaggggtaagaatcaatgccaccagaacagaaagcgccattgccgaaacgatggtgatagagaactggcgataaattgccccagtagaaccgccgaagaatgccatcggaataaataccgctgacagcaccatcgcgatacccaccagtgcgccctgaatttgcgacatcgatttttccgtcgcttcttttggcgggag
		ctttcaggttaagtttaatacctgggtttagaaagcaagttcacgcatgcgtgtggctaccgtctcaaaattgtactctgtagttaatgtgaatacttctgcatcaggcttaaagtgaatggttgttccgtttttgtcagattctccaatcacccttactgtatattgaggaacacccctatgatactcttg
		gactttcgtatcatagccttcgggcatctgcatgatgaaatcgtgcgcctgggcatcccgcgcggcagcttctatctcttcctgggtggcctccggtttaccgaaggtgatgttctctcgaatggaggcgacgaaaagggtggtttcctgcaacaccatgctgatctggctgcgcaacgagttcaggctgaccgtc
		cagcgcttttcatgcgcgcctcgttggcctgcgccagttccagcgacgcctgcgcgctgacgacgttggccgcgctctggcgctcggacgcggaaaccagtgcatcgtccagttcgagcaagggctggcctttttccaccttgtcgttgaaatcgaacataaagcttgcggacctgcccganacctgggtgccg
		atacacaaaatttgaagagaaagattcgatgcagccaatgaggatttgacaaaaccaacctgttgtcaatcgcgtcatgattttctattcccaattatgatgttaattatgaatggcgtcactttattaatcgttggttggtgcgcatcaaattgcagaatcttcgatgcaagttggcgatatgatggcgtttatgcagtatgcgattcagatcatcatgtcatt
		ccgatgctgttttaatttttcggctattagttgacggggtaaatatgttcccatgttttcagcaaaaaccaccgtaaccaccgaaataccaaatttcgaaacggaacggatttccttaacgcccggtaaatttgccatctccatttcaaccggggttgtaataaactgttcgatttcctgggtcgataaattccctgaggtagtaattacctgaatctgatta
		gatattccaacaattgggaacaatgatgacctaaagtcacttttgaagagcagccctgaactggcgattttgtaagtgaggcaagattacgtaaagccgagcacagactcagcgaagcctcatcgcgaccagatattacttgggaaatcggaattaaaaactttcgtgaaactaacgattatggattcgcaggatccatatcattggccattaggatttaaatccagagccgctatagatt
		cccgttccatgtcattggagtccttgcgccgaaaggccagtctgcgcaggggtccgaccaagacgatgtgattttcattcccttcagcactgcggagcgaaaagtattcggaacgtcatttatcgggtctgttcaggcgatgttcggctcgaccgatcaggtcgaggatttgccgatggctgccgagcagattcgagaggtgttgcgggcacgccaccggcttcagacggagcaggacgacgatttcacga
		aggtcgtcgccgtaaaggcgtatggccagctgcgacctggtgccggccaccagctcgtctatgcggcactgtatgggctggctgaagcccaccaccacgcccgggatcaccgccagcgcggcgcgcattttctcgaagagctcgtcgcgggtctccgcggttttccattcttcgcgcggccggagcacgccgaggaaaccggtcttctcc
	Type III, Type IV, ESAT secretion systems	gcaaaggagttggggtcaaactggggtatcaagctaacggcattcgtggcaatccagaacaacaggtaatgggaagcatggatttggctggcgctggattaagcggctttaatccagcaaacattgctgcaaccttggtctccaaaaatgggagtcgcattctccaggcagaactttctgccctggaatctgagggccaaggaaaaattctttctaacccac
		ccgtggcaccgaccaccagcaccaggccgcgcttctccatgatgatgtcgtacagcacgggcggaaggctgagggactccagcgccggaatttcgccctgaatgtaacgcactacgatactgacgctgttgcgctgccagaagaaattgatccggaaattgcccagcccgcgacggctgaaagagatattgagttcgcgttcgcgttcaaagatcgcgatctgctccgggttc
		cagtggatcggtatcaaccaatcatggtgcaagtcaaaccttcaatatagctgccgctactggttatcaaatctcaaacgtcacggtggatggcacatcggtagggacagctaactcatatacattcagcaacgtaactacaaaccacacaataaacgtaactttcagccaaattacttataccataacagcatctgcagggac
		cgctcctgcaatactcgcagcagtttcacctgcatggccagcgtcatctcgccgatctcgtccagaaagatcgtgccccggtcggccacttcgaacagcccgcgcttgttctggttggcgcccgtgaacgcgcccttcacgtatccgaagagttcgctttcgagcagcgtttccggaaacgctccgcagttgaccgaaacaaacggctcggtcacccgcggtgaacaaacatgcacagcgcgtgccacaagtt
		accagtgccactcatcccgtgccttggtgaagatgttattgagcaggttcttctcgcgcacgacggtggacccgctgaccaccttcagcctggcgtccctccactctgccatctgcggggcctgcatctcatcgagcgtgatctcctcaccgaagtgccgcacgaaagcggcgatgcgcagtttctcccacttctccccgtccttgccggtgctgacatcggcaaggtacttgttgcagg
		gggcgacctgtgcctgtccacgctgcacgccaccaatgccagccaggcgatcgagcgcatccttcacttctaccccgaggg
		cacggcctttgcctcgccggatgatgctgtgcaggcgatgaagagcggagcctttgattatctcgccaagccgttcaatgttgatgagctgcgcaaggtggtcagggctgccttagccaagcgcaagaccgatgcagccatggagcatccggcgggcggactaccaggtatcatcggctctagcccagagatgctgaagatattcgacctgctccggcgggttgcg
		gatcgagagatgagcggcaaagaatcattcctcagagatcgccgcgtggtgcggcgagtcgacatcggtcatggagttcctccggccactcaagacgcagctggatacgcccggcgtgctcgaggtgtgcgtcaaccgacccggccagatgatggtggagtacggccacggctgggaggtcatcacgactcctgccctgaccctggaacgctgcctctcgctcgctacggcggtcgcc
		ggcggtattccggctggtgcccgagaacatcgttccgatcgagcagctcggccttccgccggtcgtcgagacccttgcggacctcgagtcggggctggtgctcgtcaccgggccgaccggcagcggcaagagcaccacgctcgcgtccatcatcgacctcatcaatcgcaagcactcgcgtcacatcgtcaccatcgaa
		tgattcctcaggcctcaccccagaattcccccccggtccgccgtcgagagccgccccttcagataccgccggaacgctgcgtcgtcttccacatactgatacgcctcgctctcctcgatcgtcttctcgcgcaccaggtcggccaggttctggtcgaacagaatcatcccatcgcgccgctcgcgcatcaccgtcgcgatcgaagggatctggttctccagcagcagcttgcggatcatcccgttg
		cagcaagcgattcctgaagtttggttgaccagcatttatattaatgaacaaaaacatattttttacttacaaggcagcgccaataaagcaaataaagtcgcttattttctgcaacaattgcaaaaagaatctatattcgaaggacaggcttttgcaaaattgaccatgttgaaatccgtaaaaaaccctgaccaaattgattttgccgtcagcactagcattgaacctttacccg
		tcaaggaccgattcacctcctgctgaccgatctcatgctgcctggtatgaatgggcgcgaactcgcggagaagatcaccgcccagcggccggagatccccgttctcttgatgtccgggcataccgaagatgagctcgtccggcgaggtgtcgcgatccgcgcggtcaagtttctggccaagcccttcacgcttgaggcagtgaggcgtgcagtcaatgaggccttgaagtcggcagtcacg
		ctaactgcatttggctgctgccggtcgcattaaaatattccactttaatgctgtagagcttgccttcttctaaagtaatcttgccttcgtagtcacctacattcgagccttgggtagaccacttatcaataatcaatgtgccatcgacccatacgcgcacaccgtcattggctttcgccgcaaaggtatagtcaccggacacgggggcgaccactttgccagtccagcgagcactaaaataatctg
		gatagggttggaagtggagtagtgcataaccttcaacatggcccgaacctgggcgggcgagatggttacctcccgatggtctggcgcttttggcttgcggatctccttcagtgggttatggctgatccatttccactcgatgcgagcgcattccaacaccgcagacagaaagctgatttcacgcaagacggttccggcctgcacttgccgcaccctggcatcgcgccattccgcaaaatgtgtagtcgt
		gtttcggcgcattccttttgaccttctctcgttcgacgaactcgggcttccgccaataatgcgcgaaatgagcgacaagcctaacggtctcataattgtcaccggacccaccggaagcggcaaatcgaccacgcttgcagccatgctcgatcgcataaattctaccaggcacggtcaca
		tttggcgaacttatagagcgatatctacgggaagtcacccctctaatgcgaggagctaaggcggataccattcgactaaaagctatcctcagaagaccaatcgctaaagagaatatggcaatgctgacatcgagcaagattgccaagtatcgtgaccaacgcttgctagagattaagcccagtactgtagttagagaattggcctacttctcctcaatcattaatcacgccagacgtgaatgggg
		ttggtatgtcaaacccctgctcaaacaggcgtgatatgccatcgtggcgcaagtcgtgaaaccgcaaatcagggatagaaagcgcgtcacacgcttccttgaaatacttgctgatggtctgctcgtgcagcggccagatcagatcaccacgcggctgggcctgcaccagcgcccaagcctccgccagcagcggaatccactgatcgttgcccaccttctgacgcgggtctttgcg
		ggtgatcagcaagaaggtcaacatgtcaggcgggtatgaccgagatggacatggagcttcaggtcgaagccgaggccaaccagtacattccgttctcgctggatgaagtcaacatcgattttcaggtgcttggcccggccggcagttccgccgatatggtggaagtgctgatcgccg
		tacctgcacttgcgcggggcaatcgaagaaccgatcatggaagccgccaaacggattgtgatgttggggattatcatgggcatcgtactgaacctttggtcttacaatgccgtgttcgtcgatttctttgtcaacaccccgcaatcattaagcacatcaatagtaagtggaaaccaagccttatctatcatagatggtatatggcaaaaaggtggtactgttgctgac
		gccaggccgatggggagcatcagcaacggcgccacttcgtccgtgacgagcggctcgaaggcgccgtcacggacccgcaggttggccagaggattggcgagctccacctgcacgcgcaggcgcgcagcgagcacgtcggaaagcccggggatgcgcgagccgccgccgcacatgtacaccgcccgcatgggcggcgcgttgcgcgacgatgacgcgaggaaggcggcggcacgttcgatgccg
		atcaagtgccacatcgaccctgatttcacccgcctgactgaatttgatggcattggtcagcagattgaggagtatctggcgcagtcgccctggatcgccttccagagaatcaggtacaccggcagcaatcatctcggtcagctccagaccacgttcagccgctttgccggccattgagcggagcgtgttaccgagaaaggggcgcagcagaaacggcgatgagtcc
		gaagatcttttctttcggctgaatgtctttaccataattctgccacccttgcgcgagcgattggatgatctgccactgcttattgactattttctggagcgtttttcggcgaggtttggcaaaaccgtctgcggaatttcgcctgaggttatgaagattttcaatgcatacagttggccgggaaatgtacgggagcttgagaa
		atcgaggcggcgctcaccatcgcggaaaccggccatctcgtgttcgcgacgttgcacacgaactcggccgtccaaagcatcaaccgcatcatcgacgtcttcccgccgcatcaacagtcgcaggtccgggcgcagctctcgttcgtgctggagggcgtcatcagcc
		gtgagtccgtgggcaacgccttgataagctcatattcgtgctcggtgacgttaaagccaccgacatagtcgtcgtggttggcgttggggttggg
		cgcggcgcgcgtcggcgatctcggcgagcaccggcggcaggttgagctgctcgatcgacagcacctggatcgggatcagccgcatgacgatgccgaccgagccgcgctggcgaaagatcgatgcgcggaaccggccgcgcgtggcgagcgaatacgacacgtcgatctcagcgaaccggcgcgtgaagtcgacctggatgctgcggtcctcgaggatcatccgcgcga
		atacacgccccaaccatctacatcaataacacctagaccatactctcctaaaaccccaccatcaatgactcaaaggccatacacgccccaaccatctacatcaataacacctagaccatactctcctaaaactccaccatcaatgactcaaaggccatactctcctaaaactccc
		aaatactggctgctgttcggtcggatgtggaacaaggggcaacccttcaaaccgcgctctccaagcatcccaaggcttttaatgatctctacgtgaacatggtaggagctggtgaggctggcggtatcctcgatgtcattttgcagcgcctttctggatacatcgaaaaatcggtcaagctgacgtctaaggtcaagggtgccatgacttatcctataacagtgatcgtcatcgctgtttcggtt
		ggtgatcagcaagaaggtcaacatgcaggcgggtatgaccgagatggacatggagcttcaggtcgaagccgaggccaaccagtacattccgttctcgctggatgaagtcaacatcgattttcaggtgcttggcccggccggcagttccgccgatatggtggaagtgctgatcgccgcttccaagaaagagcggatcgaggatcgcatggtcgcggcagaaga
		ccgagcgcggccaccccggaaggaaatgcagaaggaagattgacaaagctccctggcgcagcacccaccgtcgtggcgctgtaggtgccaccaaactgggctccgccacgcgttgtcgcagcatcaaccggaatcgccgacccaccgcccaaacgcacacccagcgcccggccgaaggtgtcatccgcttccacaatgcgggcctcgatcagcacctgccgcaccgcaatatccagcttggt
		cgcaatccttgctgccagggtttagtccagaaaatccggcgccagatcaatgcgacgtgagtagaacaaactccccgttggcagaaatggtgagcaaggcctggtgtttcattgtagcatcatcagcgcggcattggcgcgctccacccggccatcctgccgtgccagcagcgtctgcaagttgcg
		gccacagaaccacggaaacacccgttcgcgttccttgtgctttttggcttcttccagcatcgacaccaccaccgatgacatggggcacctggcgtttgtcgccgttcttggttttgctgagaaaaatggtccgcttcgggatatcgacctgatcccaggtcagtgtgtacatttcagacagacgcatcgccgtttccagcgccaaggtaaacaggcgctcgaagtcaggctgaccg
	Type VI Secretion Systems	gtggtgaattcgaagaacgacttaagaaagtcatggatgagatcaaagaagaatcaaaatgtcattatttttatagatgagatgcatgttttggtgggtgcgggttcagccgaaggctctatggacgcagcgaatatattaaagcctgcacttgctcgaggtacaatgcgtcttattggtgcgacaaccc
		gaaagcacctttttcaacgccaaataactcagcttcaaccagttcagggggaattgctgcgcaattaatcgaaatgagtggatgtgaagatcttggactgatggagtggagtgcttttgcaaagcactccttacctacgccactttcgccaaagaataaaactgttgaatcggtgggggctacttttctaaccagattagccaccgcattaaatcctgctgaggctccaac
		aaggaatgcctgtccaatccgaaaccacggtggcaacaacatctggatcaacttcaatacggatcatgccgtcaccgttcttttcttgaagggccttcatagcctgatcggcatcacggacactttggcgcaagcttgcaagcttggactcttcctcggctgcggcaattgcttcgttcaatgccttacgggcacccagtgccagaccagctgcagctagctcttcttgccagcgcgaacg
		gaaagcaccttttttcaacgccaaataactcagcttcaaccagttcagggggaattgctgcgcaattaatcgaaatgagtggatgtgaagatcttggactgatggagtggagtgcttttgcaaagcactccttacctacgccactttcgccaaagaataaaactgttgaatcggtgggggctacttttctaaccagattagccaccgcattaaatcctgctgaggctccaac
		gactgcgcccgctatgagatgacgacgctgtaccagcagctgggcgatcccgaatcggccgtcttgctgaccgacaccgacggcgtgatcgtgcacatggtcacctccggccgagtttgccgccgaagtcggcccgctgggtttgtgcgccggcggcatgtggagcgagatcgaggccggtaccaacggcatgggcacctgcctggcggcggcggcgccgatctcggtgcggcgcga
	Ton and Tol transport systems	ctgtctcgatgaatcgggggtgctcgctcgaatcctcgagcgcgtcgcggagcttcttgacggcgttgttgagacctgcgtcgaagtcgacgaacgtgtcggccgtccacagccgcgcgcgcagttcgtcgcgcgtgaccagttcaccgggatgctcgaggagaacctgcaggatttggagcgac
		ggaaaccaatttggcttataagtaatttcactatttcctgaccattttggagcagaaggcatttcaaatccatctaaatttttaagcgcatctgttggttttgcagaaacatcgaattttacaaatgtatgttgagctgctgtacctccaattctgaa
		cttggagacctcgattgcgtccatgctgctgagcgacacctgctcgaaactgaacgcgcgcgcgttgccgtcggcgcctttgttcgcatccgcactggccagcccgatgccgtcgagcgtgacgccggtgtactccgaggcaaggccgcgcaggcgcaccccgcggatttcgccctcgaccatctggatgtccacgcccggcatgttcttgagaaagtcgccgatgttgccctcggtc
		tgctgcgttttgtcgaatgagcgagctgttgtacccaccagacaccaacggaattgtcatttgcaatgcgactgtattgttgtagacattggtatttgaagggttgtaattattaggggtgccattagaggtgttgtatccagatgtgcccaccaaatttaccgttgggtaatttaaagcttgagcgccgcgataagtactctctgcaatacttacggacaactgaccggctaa
		ttcgcgcgccacaaacgcgcgataggtggccgcgccgtcctggtagcgctgcttttccacgtacagatcgcccagtcgcgaatacagcaatgccgcatagggcggtgagccgatgcggtcgacgaatctgttcagcggttcgatgccgtcctcgtacgagaacatcacgctcatcacgcgcaatgtgtcatcgacgatctcccgatcggcgcgcgccaggttctcgggcgcacggaacccg
		ttcaggaacacattgaacatgaacgtcgtccgggccgcgctgtcggatccgacgagctcctactttccctaccgggtcggggtcaacgcagggctgaatccggcatcgctctatgcggcgatgcgcgtggatctcatcagcaccaacaagaccaggatggacatcctcgacctcaggggctcgcgcgacatgatgaagctggacggcggaacgatgagcatcgccgcgggcgccgagtaccggcg
		gggacgtgtcgatcttcaagagcttctcgattgtggagaagttcaaggggcagttccgggcggaggcgctgaatgccttcaatacgccgatgttcgccgcgccgaatgtgtcgtatggaagcagttcgttcggacggatcacatcgcaggtgaatttctc
		gcgactcgataacgaacggcggcctccctgaccggtaggatcaagcggtactcgctctcgagatcccggtagcgaagccccttggcgcggatgaactcgttgcgtcccgcctcgaaccagcggaggtagttcgcgtagtacgcgaaccccatctgatcgacgtcgccgtacagcacgcggagctgcgtccgttccattctcagggcgcctcgatccggatcagccgcgtggg
		gaggcgcggaagctcggcagctgattgaggccgtcggcaaggttggtgacaccgagcagctggagacgctcagcgcccacgaccgtgaccggcgtcggggtgttgaaacccgagcgcgcgatacgcgaaccggtgaccacgatgtcctgggcttcttcttcgaccggcgcggc
		tgctcgaccggaaagacaatctgctcgcccgattgctcggagaaagcgcgcaacgtccgcgccgcgtcgccggcggggacatcgaacgattgcttcgccgcggtggccgcgaacgcactggcgagcagcagcaggccgaaggcccaccgccaccggagcggcttgggcaacggcgacgggcgcgaggttcgggttcggcgcgggagagtggcaggggtcatggtagctggaaac
		ggcacggcgcacgttgctggcgcgtgccggcatgctcagcgacagcagtgactgctgcttggcgacatccatcaattcatactggatgctgaaattgccatcggcgccatcgacgatacggccgaccaccagaaagtcctgcttcagcttcttccactcggcaaagcggacatcggcgccacgcaggggtttttcggtaatggcc
		acagactgcaggtggcgcgatcatcggtaaggtgaccgatcgcgtcagcggacagccggtcagcgatgtacgcgtgcagatcgtcggcacgcagcgcggtgggctcacgcgcaccaacggtacgtaccggatcgccggtgtgccgaacgggacgtacaccgtgcgtgcctcgcgcatcgggtacgccgccgccaccatgccggcgacggtcagtgcgaacggcgaagccaccgtgaacttcgcgctcgg
		attgccgcttgccggaaccggggagcgcaagccgatcgaaattctccgcagcaaatttcaactgaccgggcctcggctctcaccggacgcgcgttttgtggcttacgtatcgaatgaaacgggaagaacggaactctacatccggccgtttagtccgacagccgctcccggagcagcaccttccaagggaccctggaagctttcc
		gactgggatagatacaatgtcgaactgttcgtttccaacctgttcgatgaccgaaacgagctgtcgcgcttcgtcgtttgcagcatctgcacgcaagtgaaggtcgttccggggcgccctaggacgattgggttgaggctgggcgcgaaattcctgat
		cggtcgcgtggaggtcgtccccgtcgaggacgacgagcagcgctccgccgcctactcgctccgcgtctcggtgttcgtcgacgagcaaggggtgccgcccgcgctcgagctggacgagcacgacgccggtgcccagcacgtcctcgtgctgctggacggggaaccggtcgccaccgggcggctcgtcgtcgagga
		taccgatctgggtggtccagacacgctcactcttccgctccaggttaatggacggggaggctgtagccgctggcggtgtacccccggatgagagtgctgtcagtcagctgccaggtcatgcccagggaggggctgaactggtcgccggaggtgtcggtcaggtcatagcgcaggccggcggcaagagcgaccgggccgaggctccaggtgttattgagatagaagccccagcgatctgccttccg
		accgaccgtgatggcgattgggatatttatctgatgaacgcggacggttccaacccccacgccgtgactgtcaatgccaaatcctctgattggatggaatcctggtcgccggacggccgctggctggtctatgcctcgaatgtggatggtgatgaggatctgttcatc
		aagctcaacctctcgagccgcggcttctactcgtcgccggtcgttggtcttccgcagggtgtggcagtctttctcgacggcgttcggatgaacgagcccgaggcgtcccaggtcaatttcgacctgttgccgatggaccacatccagcgcatcgagatcctctccggaaacggatcgcttctgggtcgcaacgcgctcggcggtgcggtcaatc
		tttcgaaataactcaaatagattgtattatttacatgtcctaaaacatctaaatcggcaaagcgaacttgtatttttgcgggttgaatcatttcttatctaaactttcgtattctgaattattactaataaactcaggaacaatctccttcattttagcgacaatttctgtatttttttgtagcaccaaataagcctatcaaatcatttacagcaacaatttgctcatctgcctcggttctgacttttgc
		gaggctgttaattcccgagcgtgacctggcgttgaagggccattgcttcctggttgtttggatcaatcgtgatcgcactcaacgcatacttcctggcttcgcctctgtccccacgctccaggaaaattcgacctaagaggatatgggcatcgatcaacttcggatcccagaagatcgcggtcttcagggcagcgatcgctgcttcctgatcgctcctccgcagattgattctgccactc
		ggccctggccgagcgatacgtcatttaacgtagaactctgaaatcccgtgagactggctgtgacaacgtaagttccaggctgcagacccgggaaatcgtaatttccgctttcgttcgtcaagtgagttgtcacgatgcctgtcgcgttatttttcgc
		agagctttacaagaacaacctggtaacaaagccttatggacttcattaggtagagcttgccacgaacttgagatgtacgatgatgcaatcaggttctttatgaaatctgctgagttagaccctgagtacgctatggcttactctaatatgtcagcaaccctagtacagttatcacaatgggatgatgcagagaaggcttcaagaagtgccttagactgctcacctactgacttaaatg
		tatggtggccttggtatcaagaaaggccggttcgttcggcaagagcgccaaggctttgctgatgagttgctgggcctcttccagattgccgtggttcttcaccagcacgaacgcgagattgttgagggcgattgcggccgcgggttcccgctgaatcgcctggcgatacgctcgttccgcgccactccagtccgcggaggcttcgcagagtgagcccc
		ggcggtttgtcgtgcgtccgtcaatcgatccgttgtcggcgaccggttgggcctcgccgtatccgttggtggtcattctgctgccgatgaccgcttttgatttcaactcgcgcgaaaccgacgcagcacgtttttcagagagcgccatattgattttttccgaccccgttgagtcggtgtggccttcaataagtatctgggtttctttgtacttattaa
		gccgagtacaagcagatcttccgcgagggctggcgcaatcagcgcgattacctgtatgtgccgaacatgcacggcgcggactggaaccgcatggagagatgtacggccagatcctgccgtacgtgaatcaccgcgctgatttgaactacctgctcgcaacatgggcgcggagatcg
		tgttggatgaagtgcttgttaccacggcgaccaaaaccgagcggcgcattaaggatgtgacctcatcggtcagtgtgattaccaaagagcaaattgaaaaatcccccgccaccactgttgaccaattgctcagaggtattccaggcgtatatgccacacgcatggatgccttgtcacccaatcgcattgcacaaacatacacgcgcggcttgcccggtaatggtcgcagtttggtctt
		aaatatcaattacgcatggaaggcggtagttatggttatttacgcgctcaggcttctactgccgatgtgaaagacaatatggattattttttgagttacacccacacgcaacaagacggttttcgtgatcatgctaaacaaaataatcaccgcgtttctggcaatctcggctttaaaattaatgaccaattagaaacccgcttttttgcaggttatgtgaatacggattccga
		taaatggtcgcgaagttcggtcgcccgagaatgttttcagcttcttcgaaggccaggctgggaaatcggtagtgctgaaagtcgcagctgacgcggagggcgcgaacgcgcgcgaagtgactgtcgtgccgatcgcggacgaatacggcttgcggaatctcgcctggattgagacgaaccgccgtctggtggacaagctgaccgatggcaaggtggcgtacgtgtacatgcccgatacgtcg
		gctgcatgctttacctgccttagaatttttacattggtcatcaaagccgaacaagccagatgaagatgagcgagtgatggccaacctagtcagcccagaggcagcaaataaaagccaacaagctcccactgctgctccaccaccccccaaaccgaagccagagcagaaaaagaaagcagtagaagaaaaacctgctgaaaagcctagccccactcaaacacaacaagccacacagaatccacagactagt
		gaagcgtccagcgagttggataaggttaagcaggcacaagccaacgctgcggccaacgccgcgcgcgcacgcgacattgataaatggctgagcgccattcgcggcaaaattcgtggcaatatcgttttgccgccggatgtacgtggcaatccggaagccgttttcgaggtgacacagtttgccaaccggccagatcatggcagcccggctgcagcaaacttccggcaatccggcactggatgtgg
		actgttccgcggcgccttccgggttgacgtcatcatcccagacgatatctgaggaataattgcgccaaaacgggttcggcatgcggccgcccgtcaaccggatccgttcatgggctttccagcttaaataagcctgatcaatgtaaatccctttttcgctaaaggcattgccaaaggtttgattcgtggaaacctgctcgcccgtaccggacgccaagcgaaacgccgc
		ttttttaatcgacgctgtgagtggtaagtggacccagctcaccaagaccccgatccgcgagcgagatccaaagctctcacccgatggcaagttgatcgcattccgccgggactgggatttatacacactcgacgtcgcgtcgaagcgcgaaactcgcctgacgaccgggggctctgacaccttgcgaaacggcggctt
		cgcaccgacgttgaatcgctgaagcaggcgctgcgcgacgtggccggcgacgaccgccagcgcgtggtgctgatccgcgccgatgcgcgtacgccctggcaggcggtggtgaccgcctatgaggcgctggcccagctcggtttccgcaaggtcgccaacgccaccaccccggccgccgccggcgcgacgggcaagggcaagggcgcatgagcgacaccgcctccccgtgggcgatctaccggcgcctgcgcgg
		ggctgcggctttggcgtcggccatggcgcggtttttggtcgggtcagacaggtcggcaatggcctgctgcgtctgcttctgcaggggcttcgatctgggattgcgcggcttcgcggattgcgtcggtggtcttctggctggcctcgcgcatagcatcaa
		gctggcgacttccaccgtctccgccacggcacccacttcgagattcacgtcgagattgggcaggcgcccggccgtcaattggatgccgacctgcctaaacgtgcggaatccggccaccgacaccgccactgcgtacgtgcccgaaggcagccccgtgatccggtacgcgccggagttgtcggtct
		gaggttcgtcaggcagtagcgctggaccgctcccaccctcatctccagctcgacccgccggaagcgatcgagcggatagcgcagcgtgccgagcgccccgaagtcgcgctgcaggaaggcgaggttcgatgaaatggctgaataccatcgcctgctgaagtgggtggcctgttcagttgtctggttccgatcggtcaggatgcgttggcagatccaggtcattcacggttcatccat
		atcgaaattacagggtcgagcatcaaacgcatcgctgctgaaagcgcattacccgtagagattattacgcgcgagcaattggacaaatctggcctaacaaccgcggaacagttcattgcaacgctaacgacaaacggtaacggcaacgacaatctggcagcacttgggggcaatgccacccaaggaacatcagcaaatcctgatggcgttaataatctcggcaactcttcggccaacctaa
		gcgtgggccgcagagccagcacaacaaaccaacgagctcgaagaggtgatcgtcaccgcacagtaccgagcggaaaacctgcaggacacggccatcgccatcaccgcaatatccggcgaccggcttgaagatcagggtatccagaacgttgaagatctcggcctggtaattcccaatgcacagattcgctcgcaaggcagcttcagtggtccgacgcccgccgtgggtatgcgcggcgtcatc
		cgatgtatccttcaccggcgaggtgttggtgccaaaagtcccttgcaccgccccaagcgttggtgacattttgggagcccgggccaccgtacacatacatcaatacaggatattttttgttgggatcaaagttcgatggtttgatcatatacccgttgaggagtgtgccatcgacagtattgaaggtgaaaaactccc
		gcagagaaaagagaaggaagcgcttgatatcattgaagagattctggcaacggatccggagaacattccggtgcttattcagaaggcccgcattcagcggtcgatgaaaaaattcgacgaggccatagaaacctataaagagataagttttattcagcccgatcacgccattgcgatgctcgaacgtgccgatgctcatatggaacagtcaaaaccgcaatgggccgagacgttctacaaacgtgccat
		atgcaggtgctgaccgataccgtgttcgacgagtcgcccagcttcgcgtccaacggacggctgattctgtatgccaccctggtgaacggacgtggcgtgctggcgaccgtgagtgtggatggcaaggtgcgtcaacgcttgtcgcaaagcggcgacttgcgggaacccgcctgggaaccctgataacgcggattaccaagacaaggagcattcatgaaatacccagtttttgccaccctgctggcagt
		cagaggcggaattccgccctgaggcgtccgtcctgcatccgtgtcatgcggccgaccacgaccgcctgcgcgttgatggtcttccagttctggaagttcggcggggcatcgaaattgaccgccttgtctatataggcagcctgatcgatcggcgcgaacagcccactgcgcttgagattgttggtgatgacctgagtgacgccgacaccgacctcgctatcgcccggcgtgcccgccgagaaattcggg
		ccctcaaatgtccaccgccagtcacatacatacggaaccagcaccaaagtcggtatgcccatcgctccagctaagttagctgtcagtgtatccactgtgatgatgaggtcttgcctacttatctgctccgctaagtcttctacatctccaagctcttcccttttgatctttgtgtgcatccaataatcttc
		cagcaagccgcagcttgagcgtaaccatgcggtcaacgtctgcctcaagaccgagctgctgctgaagattgtcggcgagatcggcccagttctgaatggcagaatagagtttgtcgagtgcctgcagcgcttccacgttcgcggggtcgatgttgaggatttccttcatgcagccaacggcttcttcgggcttttcgagcatttcctcgaagatcatcgccatctgccggt
		ccacgcagaaggcgatcttcggccaggcggattgggaattcgtgaagggcaccactctcaccgctggaattcgccatcaggaagaagacatctcatacaccttcctcgacatccagaacgcgaacgccttcttcgatggagacgccaacgacaaattcgaaacctatcgtctcggtctgcagcatcagttcaccgacgacttcatggcctacgcggcgttcgcc
		ctggatgccatccgcgaaagtcaggccgagcgtctggatgcgctgcgcgaaagccaggccgaccgccttgacgcaatccgggagattcaagccgagcagctcgacgcgatccgcgaagcccagcaggacaacctcgacgccatgcgcgaggccagccagaaaacggctgatgctatccgtgaggccgcgcagaagcagatcgaggaagcaca
		tcgccatcggtatcggcaatcagcagctggtagcgctgattgggtggttcgccatcgacggagatgtaggcgatgcgcgtggcaaacgcaccgcgcgtgccggtgagtttctcgaatacgcgatccgccacccgatgcgcgccattgcgcacggccgactgcggcaccgtgaccgattcattgagctgcacctggccggtgagcacattcacgagttcgaagtgcagcg
		gttgatgcatacgcaattctggtggtaaaagcccctttttcaccggtaattaccctcagaatttcatcagcaaatgtgtggctgaagcgtcgaagatcctttgctccagcaagataacgttttgctgtaataagttttctattaatgacatcaaaaagacgaaattcgattgtcaactgatcaccttttaaggagtattcgctctgaacaagcagatcaaagccggcattctgccatagaataaaaatcattg
		cgcgccaggaattacataggttccttgagtgtttgttgacgcaccgtactttgtacctgttggttggtgaacaacgttaactgttgcaccaatcaatttttcacctttttcactttttacaacacctgatagggtagaagttgttatctgcccgaaagatgcaattgtcacgaataaggataaaagtgacatcatgattgtttttttcattttgtttttgtttaa
		ggcgaacgagtcgtcgctcgccttcacttgcacttcgagaacgctgatgagcttctgccactcgcccatcgactcgtacacgggctcgagcacggacgcggcggcgagcggctgagacacgcaacagggtaggcaaggcacacaggggatagg
		atcccgcgaatcgtcgtgatgaccattcgccacatacaggaacatgatgtccgccaactgctcctgcgtcgggctccccggcggcacatgcgcatgcatctcggcgagccccggcatcaggaacttgccgcgcccgtcaatacgggtcgctcccgcggggaccgtcgtgcgcgccgcggggcccatcgccgtgatgcggccgtcctgcacgaccaccgtctgctcggcgagccggcggtcgccgt
		tgcaagcgatcgctccagagcagcttttttgctgtcgggcgaccatttcggcgcgtagtaataagtgtcgccgccattcgtgatctgttgcggctcgcctttgccgtcttgcgagcgcacatacagttcgttctcgccggtcgcgtccgaggtgtacgcaatccatttaccgtcgggcgaccaaactgcatcgcgttcgtgtgcgcctgaagttttgctcagattgcgaggcgtcccgttctttgctggg
		gagggaaaaactaaggaggaaaatgcaacattcagcgatttggaggtatatggaagggctggatttcgaagcaaagggggaattacagcaggcgctggagtgcttttcagctgcaatagcagtgcaagaagaccaaggagaactatggctcgccagagggagaactcgcctagcactcggagaactggaccaagcgctctcagactgcaaagaggcagaagaccgagggggaaatgtgcactatacccgtgg
		ccgatctatcagggtgggtcggaatactccacgatccgccaagccaaggagacgttggggcagcgtcgtttggacctcgacactgcgcgcgatcaggtacagtcgacggtgacccaggcttggggacaactccaggccgcgaaggcacagatcaacgcgacccaggcgcaggtgaccgctgccgaagtagcgctcaatggtgtgcgcgaggaaattgccgagcaagcgatcatgaactgggn
		cgccagaggtcagaccctgcaggtcgaccaggatgtcgatctcgtgctggcggatcagctgcgcggcgctgccgtcgtccagcccgccgatgggaatgaagtggtccatcgccgccttcacccgggcacgcagggccgaaccatcctcgcggctccaacagaaaccgtagacctcgaagcgctcgcgatcgagcagttcgaacagctccaccgtcagcagcgacacggcatgcagg
		gacaacgccgcggatgtacggatcggaaccgccgccttcgccctgcgtataggacaggctgggcagcagtttggcgtaatcatcgaaatcattgacgttcatttcggtgagcttctgcgttcccaggacctggatgctgatcggcacttcctgcaggttttccgtgcgcttctgcgcggtcacggttaccgtgtcgagcgtagcctttttctcttcggctgcctggtcatccgggcggccaaagccgccgtg
		gctcgaatacagactgaaataacatcaatgcgtggcacctcttggttttcacgcaacgtattgtcaacgccgagaatacttgctgaatgaagcagaggttctggttgtttgcgttgacccactcaaaatgaagcctcgtgcgcttcccaagtctattgtcgcggagtttaagcagtgactg
		tcctgctctcactgccgcttttaatatctattgtataaatatctccgtttgcgctttccctgtatgatacaaaaactatcttattcccgtccgctgaaaatgccgggaactgcccccctttttcagttatcttttttttatctgaaccgtcagatttcattatccagatatta
		agctgttcgctgcgttctgtctctcgttcgtcgtctcgtcgtgcgcgcactgggtcagccaggagaaccgcgataaggcgcagagccactacgatctcgcggtcggcctcatctctcgcaacggccagcagtcgttcgcagagatcgagaccgcgctcgagctgaaccccgagttcgccgaggcgtggcacgtcaagggcatcctgctccatcactcgttcggaaagttcgaagaggcg
		cacgacgccgatctcagcccggcgatttttcgcccaggcttcttcattcgagccgggatcggccggcatctcggcgccaaagctgaccgtctggatgttctgggcgtccgcgcccagtgcgatcaaggcctcgcggacggattgcgcgcggcgttcgccgaggccgcgattgtattcggccgtgccgcgttcatcggtaaagccagcga

## Sheet: Amino Acids and Derivatives
Subsystem Hierarchy 1	Subsystem Hierarchy 2	Sequences
Amino Acids and Derivatives	Alanine, Serine & Glycine	aaagttgattttcttactaagttttcaggcaccattgattcattggctaattgactaattgtgattttgttttttccagttgcttcagcaaaaaatggcaatgatttgattaatatcatttaacgaagttgtttcgttaaaagaaatcgaaatcgtttcagcatctggatagaagaaatttacttcgtgtttttc
		cgcgccggtgaagtcgaagaccacggagccgccgcggatctcggcgggccgcgggctgttgagcttcatgccgagctcgtcgacccagtcgatgcacttctgcgtcatgacgaggctcttctcgcggatcttgcgcacgccgatctcgccgacgatgcgctgccccgcgcgcgactggtagagcccggc
		ggtgcatcagttacatcagccaataaattggccatcaactgagtttctatttctttaaagccacgcgtcgtaatagcaggcgtaccgatacgaatacctgaagtgatcgtaaatttttcagggtcattggggatagcatttttgttcaccgtgatattcgc
		ccgcgcgaacttgccgcctacccggacgcccacagcaaggtcagcaagttctggcccgcagttggtcggatcgacaatgctgccggtgatcggtgcctcgtctgcaagtggccgttccccagcgcgtagcgcgcgaccgagcagcatcagactggagctcgcctggctactgccaggtgccgtctctggatgtccgccgatgtcatcaccgacagtcgacgtcagtgcgcct
		catacagcggcgagcccgccaccggcggctccggccacgttacatccaacaccgccgtgagatccggccgctccgtcagcgccgcgatcaggcccggctcatcgacgatcgccccgcgcgccgtattgatgaaggtcgtacccggacgcatgagacggaggtgctcgccgcggatcattccttccgtctccttcaaccacggggtgtgcaggctcacgacatcgctgcgccggaacagctc
		tacaggttttgcgggtgtttctttacagccgaactctggtgcacaaggagaatatgcaggtttaatggtaatcaaagcatatcacgaatctcgtggtgactttaaccgtaaacacatgattattccttcctctgcacatgggacaaaccctgcatctgctgtaatggctggattcgaagtggttgtaactggttgcgatgaaaa
		gaggcgttgtggggcgtcagcagcacgttgctcatccccatcagcgggttgtccgtctgcgggggctccttctcgtagacgtcgatcgccgcgccggcgatggtcccgtcgcgcagggcttggatcaggtccgcctcgacgatgacgtccccgcgcgcggcgttgatgaagaa
		gattaaaaactgcgcccactcaaaatcggagtcgccgctgagcaaggtgttatcgaggtcaaaaagagcgagattcatcaggtattttccagattaagtagttcgcgcagcaggggcagggtgacggcgcgtttttgttcgagggtgtattgatcgagcgcaacgacaagcatcgacagcgtgcgcatgtcgcgtgcagcgtgacgcagcaggtagttgatcgcttccggcgagagcttgaggg
		gccgcgccgacttcatccagtctgcccactgccgtcgtcatgggtgcattgtgaaagctttccggattttcgagggccctgttatagagcgctatgaaaacctcagccacatgatccagagtttctctggattctgtctccgtaggctctatcatcaaagcctcaggcacaatca
		ttaggttttgcatgaaaagcaattcctaaacctgctaaatttagcattggtaaatcgttagcaccatcaccaacagcaatagtttgattgatatcgattccttctttgcgagcgatttctttaagatattcagcttttttgttaccatctacaatttcaccaagatatccaccagtaagaactccgtctttgatttctaa
		accttgatgattgaaccaacagaaagtgaagacaaagcggaattagatcgttttgttgaggcaatgattggtattcgtaaagaaatcgctcaaatcgaagctggtaaagcggataaagtaaacaacgttattaaaaatgctcctcacacagctgattgtattattaaccgtgattggacttatccatacacacctcaagaagc
		ggtggcaatggcttaacagaagctacccgttttgcgattttgaatgcaaactatttaagagcccgtttcgaaggacattacaaaattttatataccggcaaaaacggaatgtgtgcgcacgaaatgatactggattgcaacgaattccaccatactgccaatttgcctgtaatagaaattgcaaaacgtctgat
		attaaggtttttctatttacgagctcaggtgatgaatctatctcttcattgagtgcaacaatttcaccgctcactggagcatgaatatcgctcgctgcttttactgattcaatcactgcaatcgcttcgccctgctttacttgttgacctagctttggtgcctgaaagaacatgacatcaccaagagcctcttgggcgtggttgctaatgccaacccagattaggccatca
		cattcccgttgctgtcttcaaaataaatttcgacaccaccactaccagtatatccggttgcactgattactacattttctacaccggcaaacaccccttttacaaaagtgtaatatttcaaattgcaaatgtctacttcggtaagtggctgcagcattttac
		catcatcgatgcgattgacgtagggccagaacttgttctcggccacccacggtagcgggaataccgcctgctggcgggtgtaggcacggctccagtcggcgtccatcacatcggcttcggtgtgcggggcatttttcaccgggctttgctccagcgtccatttgccgctttcaattgcgcgaatttcctcgcgaatcgcgatcatggcgtcgcagaaacgatcc
		gaagcggtatcggccgaaggtcttggcgtgggctatcatccaagaccgcaacttgccgccgcagccaattttgcggtgcgccataatgatttgaccgcgctgctttttgcgcagggcgttaaacccggcgcatgggtgcgttgagtaagcgaaacaaattgagcggcgtagggttgatgttatgatgccccattccgtttttctataggagcataatatgcgtgcatttctgcctgttctactcatcccggt
		gctccccggcagccatatggtaggctttgatgatcttgagcccggtgtattccccatgggcccccgcacagggctgcactgttccccatgccatgccggtgatagccgacagctgccccagtagacggtgcatcaattcaagggaaccctgcacggtatcgctgtcctgcaggggatggatatcggtgaacccctcaagcgcggcaacctgctcattcatcttgggattgtacttcatggtg
		gggttgccggtttggcgtgataggccacggagagcccggattcagccatcatcagcaggtcgttggcaccatcgccgacggtgatgatctgttcccggttcaatccgagttcatcacgcaatcggcagaggtgatgggccttggcagccgcatcgacaatgtcgccggcaacgtggccggtaagtttgccacctgaaatctccagttcgttcgaggtggcgaaatcgaagccgagttcaatgcgcagacg
		gggttgttccacaatatcacgccgccacgtggtccacgtagtgttttgtgcgttgttgaagtaaccacatcagcatgtggaaatgggctagggtattcacctgcaacaaccagtcccgaatagtgcgatatgtcacacagcaatatggcacctaccgaatccgcaatctcacgaaaacgactccagttgatggttcgtgagtaggcactggcaccagcaatgatcatgcgtggttggngtttttgcg
		cgctaccgctggataaagtggcgatgaaaatcaaacccgacgatatccatttcgcccgcaccaaattactcagtctggaaaacacccacaacggcaaagtgttgccgcgggaatacctgaaagaagcatgggaatttacccgcgagcgcaatctggcgctgcatgttgacggtgcgcgcatctttaatgccgtggtggcttacggctgcgaactgaaagagatcacgcaatattgtgattcgttcaccatttg
		catcggagctggccccggcggttattcccgctgcgattcgcctcggccagttaaaggtcaagacctgcgtcatcgagcgcgagtacatgggtggtgtgtgcctcaacgtcgggtgcatcccttcgaaggcggtcatccacgccgcgaagatgtacgagaagcttggcaaggtcgacgagctcggcatctccatcgagggcaagccgaagctcgacatgaagaagctgcagacctggaagagc
		catgtatggcgcctctaattgataattggatagaagatcttgggtaatcgtcttctttaactaaagaaactctaccagttaatcgctcgatagcatcaatattcaagtttttatctgaaattacttttgttacatgagaaatttgttctgctgttaatttttctcctaaaagcgtaacaatataac
	Arginine, Urea Cycle, Polyamines	gcggagaccacccaggcggccaaggcctgttcgtagcggccccggctgttcatcacgtccatggcgctgccctggacccgggagaaccccaggagccgtgcgctgcgggcgcggtccagggggatgggcgggccgaatccggcggcggcgcccaggggacaccggtcc
		cactgactgctcgcttcctgaccgaccagccggacacgtcgtcatcaccgagccggatggtgccgttggccttcgcgaacccggtgacggcgtcgatcaacgtcgacttgccggcgccgttcggcccgatcagccccacgatctggccgggcgccacctcgagcgacacgccgtccaccgccaccacgccgccgaagcgcaccgtcaggccgtcgaccgacagcgcc
		ccgatcgagcgcccgcggcgcgacgccgccctggacgccgtgcgccaggtgatcgaccagcacccgctgcggctcagtgctggcgccaccagcccgcatccgcaggtgctggtgctgcgcgtgctggcgccgctggtcgagccggtgctggcgttgctgcgcccggcccgt
		cgaccgtggtagccaatgccgggcaaaaatgatgaaatcgtgcgccgggaagtattcggcccggtggtgtcggtcacccggttctccgataccgaccaggccatcgccttcgccaatgacagcgattacggtctggcgtcgtcggtctggaccgccgatatcggacgcgccatgcgggtcagcagc
		gctgcagcacggtgagcggcagctcggacaggtcgcaggcgtggctgatggcggcctttacggcatgcgccacggtctcgtgcgcatcgcggaagggcaggcccttcttcaccaggtagtcggccaggtcggtggcggtggcatagcctttgagcgcggcctgttccatggcctgcgcgttgacggtgatgccgccttcgatcttgccggtgtcggggttcagctggccgcccaccatctc
		tatcacccgaagccgctcaacacggcggtggcgaattccgcgctgaccatcgccacccgcatgggcatggacgtcaccctgctgtgcccgacgccggactacgtgctcgacgggcgctacatggactgggcagcacggaacgtggccgagagcgggggttcgctggcggtcagccacgacatcgaaagcgcctatgccggcgccgacgtggtctatgcgaagagctggggcgcgctgccgtacttcgg
		caaattattgataatttgaacgccatgaccgaccattacgaattactcaaagaagctcgtggcaaaggcatgatgattgccattgaattccaatcgcccaaagtttaaaactcaaagcaggctgggcaatgctcgaagcagcaaataaaggcttattctgcc
		gtcgggttaatggaacgcaaacaacagctattttcactgttgccaagtcttgcgatagttgttttaggcgttatctttttacctagtgtggttaaagcagggcaaatgcgtccaagcgaaaaatttaatgtgttgtatgaacaagaaagtttatacggttgggtgcgtgtgattgat
		attttgaaagcaaccggctcagagtacgccaatctctttttggaacttggggcaaagtcggcgcgcagtttgaattttcgcgcgcgcgaggaatccagcgcggaagaatttgtggaagcaattgaatcagcgagcgggattttcatctccggcggaacgcaaatgcgcctgcccgctgtgattggcggcacgcggcttgagtccgcaatattcgacgcatatcggcgcggcgcggtcattgccggaacaagcg
		tattaataaagtaattactgaatgattccccaggattggattttgagcttactaatagattttgaagtactgaatggttaggaaatatcattgggtcttgccacatcctaccaattcccgcttgagcaatatgaaattcatcacggtatttaattttcattccattaaaaaatattttgccttcattaggtttttcgtaacctgcaataa
		tgagtactgaaattacacaagactgcaaaattgaatacgatcaaaacaaagcttttgaaaatgccgattttgtttatgtaaaaaactggagtaattttaacgattacggaaaagtgactaacagtgatccaaactggactgtaacagcagaaaaaatggctttaacgaataatggaaaattcatgcattgtcttccggttc
		cattcattatcaaaatatttataaataacatctaaaatatcagtaaaatcaatatcacaattacaactatacaaatcaattgctatataatgagtttctggatatgtgtgaatagataaatgactttcgcttataaaaataaacatagtagcaccaacctggtttaaatttagatattcc
		tgggaatcgaaccaggaatgagcgatgtctttgcgcgctatgcagcagatgaactcttctcgcagattgattacctcgctgttatggacggttcaaatctcgctgtttcaggatatgaattcgctccatcattttctatctggacaacaatcgaagagtgcctcaatcccccattgatttgggaaaaggttcgcggttggtacacaacggaaccatttagcgaac
		aggatttctagcagcagtgcgtgttccaccctgccgtcgatgatgtgtacgctcttcacaccattgcgggcggcatccaccgccgagccgatcttcggcagcatgccgccggaaagcgtgccgtcctcgatcatgccgtcgatttccttgggcgtgatgccggtcaacagattgccggccttgtcgagcacgcccggggtgttggtcagcagcacca
		aacaggaattcgggctggaaaatacgccatcctgatcgcatccttgtattcgccattgacaaaaaattacatgccgcagcgtgccttcctcgcgaaagccgagcttgcgatagaccgccaatgcggcgtcgttgccgctgtcgacgaccaggaacagcttgtacaggttcagcacggtgaatgcgtattcaattcccagcagcgtaccgacctgggcgtagccttttccctggtgcgccggtgcg
		gcctcaatgccttcttcgcgttgtgcatattcgtagacgaccgaatacacgcccggacgaccggggatggatcgggtacgtccgaaagtgacatcctcaccggccatgttctgcaactcgatggccacatgctcgagcacatgcccaagccaggtgccttcatcttcctgcatgcgccggatgaagccgccgggttccttataggaacagccatgttgcttgagctccggcagggccgcgaccaagg
		gtcgtcgtgcacggcggcggaaaggccatcacgcgcgcaatggagtcctccggcctgaaggcgaatttcatcaacggacagcgggtgaccgacgaggcaaccatcgccgtcgtgaaaaagactctcgacgagatcgtgaacaaggacgtctgcgacgccatcagctccgccaagggtcggcccaagggcctgccgggcgac
		ggtattgataatcccaccatcattgtgatggagcatgcgttccatggccgcaccatggcgacattgtcggcgaccggtaaccggaagacgcaagcaggctttgagccgctggtcagtggttttgtacgggttccctacaatgatattgaagcaatccgtcaggttgccgaacacaataagaacgtcgttggtgtgctgctggaaatgattcagggtgagggcggtattcatttggccgacgatcagttccag
		gaggtggccgatctctccaagagcttcggcgcgcccggccacccgccgaccgtggcgctcgatcgcgtctcgttccaggtccaccgccgcgagctgatgtgcgtgatcgggccgtcgggctgcggcaaatcgacgctggcccgtctggtggcggggctcgaggcgcccacgggcggggagatgctgctcgacggaaaggcgatccagggtccgggctccgatcgc
		gctgcagacgatcctctccaacgggatcgtgcccgtggtgccgccattgggcatggacggcgacgggaagacctatcgcgtcaactcggacgcggtcgcgctggaggtggccaaggccctgcacgcggtgaagctcgtctacatcaccacgtccgacggtctcatggtgaacggggcggtggcgc
		agacaatcaggaagataaagaacccctcgtttgacgcagctgatacgctgactgacacactacgcatcttcgtagacctggtgccaggcatcaccgtccgcccagaaccgatggccagtgcgctactgcaaggctttgctacggctactgacctggccgactatctggtgcgcaaaggattgcccttccgtgcagcacatgaggccgttggattagccgtaaaagccgccgaacagaa
		ccatatgctggcgtatgtcgagatgttcagcagggataaagcgcgcatggaggactgtctcaaaagggtcaacgtgctgccgctcggcgccggggctcttgccgggacaacttttcccatcgatcgagagtacgtcgccgaactgctggagttcccggcagtaactcgcaattcgctcgattcggtttcagaccgggactttgccctggaattcattagcgcttcttcaatactgatgatgcacct
		cggtgtaaccgttcgtgcgggtatgcgccgacggacggctcccttccacggcctttgtgacggggctccaatttctgtgacattgctccgcttgttgatgtgcgaaccggcagaatcatagtcgtctcggcaattgacaatctggtcaaaggggcgtccggccaggcggtccagaatatgaatctggtctgcggattcccggaaaccntggggctggagggcctggcgctgttcccgtaacagaattgaaag
		ccagcaccagcttgctctcggtgggctcgccgttgatcatgaatttactgccgcgcggatctttcgccgccgccagtgcgcccgcgctgttgcgctcctcgcccactacgaacaacaacgccacccgccgctcgccagcctccagcagcgtctccacggcaaaaatcatcgacgcgatgattcccttggtgtcgcacgcgccccgcccccagatgaattc
		catttcgccgttaggttccgaatgcagatgacattaaatcgtttggagattcaacctccgatcagattaaaatgataaggtttgagtaagatctttaccgtacccattaactgttttctgcgagtttcgaaaagcatttcgatgtcattcatcaccggat
		cgggcaacggcgtgaatgtcggcttctcgatcccggtcgaaggcgcgccgcagtggttcgacatgctggctatcccggccgacgcgaagcatccggagaatgcgtatgcattcatcaattacctgctcgaaccgcaggtggccgccaacaacaccaacttcatccagtacgccaacccggtgaccacggccacgccgctggtcgacgagccgat
		gaggaaataggcagtaggcaataggtaattgagataacacatatatataatagtataaaacagttttaacatcaaatagtaaagtaatgaaagaaaaagtagttctcgcgtacagcggtggtctcgacacctcggtaatattgaaatggttaatagaaaagaattatgacgtcatagcgttc
		gccatcccgccgtggtcaaggcgatccaggagcaggcggcgcggctcatccacgtcggcaacctcttctacaccgagccgatggcgcggctcgccgaccgcctcgcggagagctcgctcggcgggcgcgtgttcttcacgaactccggcgcggaggcggtcgaggccgcgctcaagctcgcccgc
		gccaactggcgggtgcggtatgggccgctctggggctgggaatcgtcaccaagttcctcgaaggctgggccggtgccgttattgccaaagtggccgttctggtctttgttattgtttttatccagaagcgtccgcaaggtctgtttgcact
		gatgccggtgtagccccagatcaaatccatcgcaagcgcgcagatggcgtaacacatgatcttgccgagcaggccgaccatgtagccgctcaggtggaaggcgctggtctcgggcacgaacaggttgagcagcggcgccacggcgcagaccaccagcagcgcgaccacaaaggcgctccagccggcgcgggtgagcagcgggccgtgcgacggaagagcaaccggggtggtggtgtcg
		gtaccagcggctcgcaccgaggtctcgtgccgcctccaggtggctgcgatcgatgcgatcgagcgcggcgaagagtggcaggatcaggtacgggatgtagccgtagacgagggccaagatgacggtcgaggcgcttccgccgagccagtcccgcggctggctgagcacgtgggtggccgtcaggaagtcgttcacccagccgttcagctgcaggaggttcacccaggcgagcattcgcat
		gcaccatgcgcctcgcggaaagtggcgcccttcttcaccaaatagtcagccaggtcggtcgccatcatcgcgctcgagcaggccgcccgcatacgcgcacgttcgaagcgcaattcggcgatcgcaccagccattgatggcaacaccagcagcagcagatcgatggcgttgaacagcgcgcgcttatcgtcttgcagatcctt
		gcgatgcgcgcagtacacgatgccggggcggccggtggcgccgcgcgcgaacttgatcgcggcctcgacacattcggcgccggaattggcaaaaaataccttgtccagatacggcacgtgcttgagcaggcgttcggccagcacgccggccagcgtggagacgtcgagttgcacgagattcggcagatcggcgtcgagcacgctcttcagggcctggcgcagcacggggatggttgcggccaa
		ctcaaagagccgcgccaagtcttggttttgggcggcggcgacgggatggcggtgcgcgaagcgctgaagtatccgtccgttgaacacatcacgctcgtggacttagacggcgccatgacagagctgtttcgcgatcaggacactttggccgcgctcaatgaccaggccttgcgctcgcctaaggtgagcgtcatcaatgccgatgcctatgcgtggctcaaagccaacgatcg
		acagcgagtcggtcttcgagtcgcggccgacgacgatgacgttgcccttgtacagcttgaggcgcacgaaaccgttgacgttctgctgggtgtggtcgatcagcacctgcagcgccttgcgctccgggctccaccagtagccgttgtacaccaggctggcgtagcgtggcatcaggtcgtccttgaggtgggcgacttcgcggtcgagggtgaccgattcgatggcgcggtgggcncgcaggcagga
		attacgtctgcaattgtgttgtaagaagtggtaccaagttgtgcacctagatttgcatctttcaattcagagattgaagttacgccatctagctttgaacccttaagggtgatcaatgcttgtgcaacatcgtagtaaccttcagagaaatcaacagcgttcttacgttcatctgtgattgaaacttggttgatgtcgaagtcgaatgctttgtcgccaggtgcaatcacgctgtcgaaagttg
		caagatgcgtacatcctttcggtgttgatgtacccgcgcgcgttttccgggcagcgagtgcgacaggggtcgtcggcagccggcggcattccgcggcgcgcctgcagcttgatggcgggaggcgcgtacttcgtggcggtggagagaggatggggacccgcgtgcagaaccacgatcgagtccatctcgaagcgcaggtcgacgtactgacccgcgcgagagtggcgcgcggcgaccttaagcgcgccggcg
		gagcaatgataccgatacaggtcttccccttggtcagcgggccgagactccccggatcagggagaagagctttgaggaactggatcggcacgatcttctgaccgttgaaatccacttcgtcgatgcgggtcatgccgacattctgcaacacctctagatgtttcaggtagttgtcggaaaacgtcatccagaactgggcttttttatgtcgggatatgtttgacaatcgactccatctcttcatgataaagcga
		gttcgcttatcgctgttgcgctttcgcgatacaagttccgtggcagtggcggcatcaacttgttcctggtgctcccgcttacgacgccagaaattgtgcttggttcgtcgcttgcaacgttgttccttggccaaaacttcattgactttggtatgacgaccatcatcattgctcacgtca
		cgaaacggcgttccgtggtcatcagcggtgccggcgaccgccgcgacgaagacattcgcgagcagacccgcatcctgggcgacgccttcgatgaagtcatcttgtaccaggacgcctgccaacgcggtcgtgccgacggcgaggtgctggcgctgctgcgccaaggcctggaaggggcccagcgcacacgcgagatgcacgaaatccacggcgagttcctggccatcgaccgggccatggacaag
		aggtagagctgctgatttgttcgagccaggtgaacacggttcaactttttggtggaaatccaataacaacttctgcagctcttgcggtgataaaacaattgaatccaagaaatattgaagaaagttcaacgtcaaggacgctctcttatccaagagctagccctgattccaggtgtattac
		gtcgacgaggccggtgccgggcgctggatagtcgacctgctgagcgcggccatcggccgcctcgaagcgccgctgctggccagcctgatgcagcactggagcaacgccgacgagggcgtagatccgccgcctcaacgccgatttcctggccagccgggaaagcgcggaattgcgcgccgaaaccctgcagatgggcttctcgctcaagcgcctgctcgccgacctgcgcgacccgctg
		gagcaccaacgacacggtgctggtgctggccaacggactggcggggaacaagaagttcggagttcggagttcggagttcggagtttttcaggcctctttgaatcacgtctgcctggagctggcgaagatgattgttcgcgatggcgagggtgtgcatcgcgttgtgacggtgc
		ccaacccttagagacccggtggcgtgcgcgttggcgacaagggctactacctagaggccgcagttctttcaggtctaaagcagcaggatgagcacatccagagcgaaatctttggaccggttgtgacagttcagaaattcagcaccgatgaagaggcgctgcgctgggctaacgatgtgaagtacggcttggcatcatcggtgtggacacagaaccacacccgcgccttgcgcttctc
		cgacaactcagagccttctatagtcacaacacatttgctgacatcctgcaacagccgcttaccggaaatgacctcctctgcttcgatgatctcgtagccatgtcggctcagctcatccagtgtatataaattcctgttataaccgatgatcttccccggggcaagggcaaaaaaattagcgccgctgtgccattgctctctttcctgggtccactggtcagtcttaccgccgcaat
		gagggtgaggagattttcgtcttcctcgcggtattgttcgaggagaaatccgtcgttggcgtgccagcgcagccataccgagtcgttccagcttggcggtgtttcgtcgaggaggaaggtgcggtgttgttgttcggcgcagaggcggtattcgccggagc
	Aromatic Amino Acids & Derivvaties	tattggaaaacgcagtcgcagacatcgacaaagtgaaacgcgcctgggaactctgcggcgccgatgtgcgtattctggatgcagatacgcatgaccgtgtttttgccgcggtgagccatttgccgcatttgctggcctatgcgctggtcgatgaatttgcccgtcgtcccaatgccgatcaattgtttgatta
		gcgagcgcacgttgcgcgagctgtatttgattgatgaaatttttcgccagcgcaaaccgacgctggccatctgccgcggcagccagcttttgaacgtggcgctgggcggaaccttgatcgcggatattccgtcgcaggttccgaaagcgatgaaccaccggcgcatggacaagcgcagc
		cgaacggcgaaattcccgcctgctcctccggcacatattcaccgtttcgataaatcgtctggctcatccttgttgccttccgctcacaacgcctcgatctccgcacacggctcgcatcacctctgcctgcgccaacgcctgcaccatcccgcgcgccttgtgcaacgtttcctcgtattccagcgccggctccgagtccgccacaatgccgccgccgcatggaaatgcacgacaccatttt
		gcacctattttccattccggcagtctggccatccgccaaggccattgccgcgaaggtcaacatcacctacaagattctgtacaacgatgcggtggcgatgaccggcggccagccggtggacggcacgctgactgtgcccgatatcgcgcatcaggtccgtagcgaaggcgtgcagaccatcgtggtgctgagcgacgacatcgacaaatgggcagatcactccattttcccgagcggcg
		actttcggtggtccgcgccccgactggcgccccacggagatcaggtcgccgatgtactgcggcgagatcacgtccaggaactcgctgccgcagggcagtccgagccggttgatctcgatcagcagctgtcgcgcgatgcgcaggccctcgtcgatgcggaagctctcgtccaggtagggatcgttgatcaggcccttccagcccaccgtggttcgcggcttttcgaaatacacgcgcatcacga
		gcaaaacgttgagaagaactccgcatttgcgacaatttttcgccgcgtctttattttccacattgcacgaaggacatttcataagcttgatttcctccccttcaccacgcgatcgatcgcgatgagacttttcaaaattcctttcaaatcttttaagcgcacgctattgggaccgtcggacagggcgcggtcggggtccggatggacttccaggaacagccccgagactcccacggcaaccgcggc
		cggttgaaggcgtgcagtttcatccagagtcgattctttctgagcatggccatgccctgctcaagaattttttacaaaacaaataagcaaccttaattacagcgctatgccaattactccgcaagaagccttacaacgctgcattgaacatcgcgaactatttcatgacgagatgactgccatgatgcgtctcatcatgagcggtgagatgtcgccagagttggttg
		cgacgcgtccagcagcgccggcgacaccttcatcgggtaggccgtgcccaccagcaccagatggctgacacggtctttcagtcgcgccgccgcctccaatgcgatcagcgagccccagctgtggcccaccagcgcggcacgcgtcacaccggccgcatcaagcagcgcggcaatgaagtccgcgcc
		ttgtccgcccgattgcaggaacaaggcctcgtggcagcaatccagagcaagatgcagctttagctaaagaacttttggcagatccaaaagaaattgctgaac
		gccgagccctggcgcatcaaggtcgtcgagccgctcgtcatgacgacgcgcgcgcaacgcgagcgcgccatcgctgaagcgggattcaacacgtt
		tggccgaagcggcccatgaggagggggtggatttcaggagtctcaagctgagggtggggattttcggggcagaaccatggtccgaggcgatgcgtgctgaaattgagggtaaacttaacctgtcggccatagatatttacggtctttccgaaatcatgggaccgggtgtggcca
		ggccttggccagctgcgagtcgtcggtgggcggggtatcatcggtccgctcgacgcggatggtcatgtagtccttgccgtcggggcggtggtccagtagcacctggaattcgctccccaggccggcgatggtggcgagcagttcatcaatc
		attgaatcgcttccgatttaagatcggcaggcaaatactcatcatatgcttcatccagcacaaccagtatatttttaggtacctgcttcagaaatgcataaagctcatctttacctaataatgtgcctgtcggattattagggttcgcgataaaaatcatgtgcgtattagctgttatggctttcagcattgcatccaggtcatggccataattttttgccggtactacgacccctgtcgcg
		tataaacacaacttttttaaaaacactagataaaagagatgttctatctggttatggagagataattaaactttgcattgtgggcggggaatcgacaattaaagagtttaagaaggttaaggagttgcaaaatggagatttatttattcaaaattgatgtgttaattaaaacagcattaatggttaaaaaagct
		tcgtcgaaggcatcgcacgcggcgtgcccgctggctggggcgatcctgtttttgaccgactgcaagccgatctggccaaaggcatgatgagcctgccagccgccaagggcttcgatttgggcagcggcttcggctgtgtcctgcttaccggccaggaacacaacgacgccttccgtatgaaaggcgggaaggtacgcaccgtgaccaatcattccggcggcgt
		tcacgccgggttcgtcccgaaggcgctcctgcacctcggggaggtggtcgcgtccgaggacctcgacgcccggagcgaaccgggccttcgtgccgtaccggtcgggctcgtgagcgcagaccacgatcttctggacgccttcggcgtcgagtgcccgggtcatcgacggcacgtcgagca
		agttcgtcgcgcttgaaccacacttgtgcgccgcccagttcttccgtcaggcgcggggcaaagtagagcgggctgggccggccgacataatgttcgagcagatcgtcgaattccgcctggaacgcagggtcttgcttggcggcgcgatattcgcgctccagatcgaggatcagcggcatcagcgtttcggcgacatatcgcccgccgaactggccgaaatgcccgcgttcgtcgggctggttgcgataggag
		atgtaccgaaatacgtcatgctgcctaattacggcaaaatcaagcatgtcgaaatcgaagcgcgcctcctcaagctgcaggagtttgccgaaaccaccccgctgaaccgtatagaagcgggagacaaagagctcggcatcattacctcgggcgtcgcctatcagcatgttaaagaggcgtatccaagcgcttctattctcaagcttggcctcgtccatccgctgccggaaaagaaatccgtgaatttgcct
		gtgatgtgctgcaaatgacatcaaccgtgcaagctgaaataaagctagggattgagcttcgcgatgttctcaatgctgtctttccttgtggctctgtaactggagctcccaagaaacgcagcatgcaaatcattcaagaattggagccacaagatcgcggttactattgcggcgcacttggctggatggatcctagcggtgactttgcatttagcgtccctattcgcacg
		ttaccggcgctttcggactccattacggcgccgaacttatcggcgcttccgttattcccatgggaggcggcaataccgaaaaacaact
		tatctccaggcttaacctgtgacaataccggatagttttccacattttcgtagtagtctgcaatccaatctatcatttgtttcccctgcttccgaaactcttcggaagacatgtgaaagttcttcgtattttccattggtaagtttatcgaatcgtaaaattggtaaatagtctggttggagaaatatcggatacggtgaatgtctttataactgccctggttggaccaattttcatccaatcta
		tcgccagttggatcactgctaaacgtaatgcccgcaccagtgccaaagcgcaactccccctgctgatactcaaaacttactgattccaactgcaaattcagcgttagtgccatgaactatgccaaagccgccacagtagccaaggcggggcgctggctccaatctcgaaattacttctagtgcggcagattttaggagcgccggttgactgatgctggtgggaaagttgcagcaaaaatc
		gatccaacggactgccaaaagccttcgatcaaatcggtatcctgcggagagttttcttgtagcggacaaagaatggtttgcttaccctcaaagagatctgcttttgcagcactcgcaccatgttgcgcgccacctgcaatcggatgggctggcacaaactgacaagcttttttacccaggacttccttagcagccaaaatcacatcacccttagtgctgccagcatctgtcagcatggtccgag
		ggcgcgcatgcgcggctcggcgcacaacgatccgttcgtccggaaggacggccggctcggcacgtccaccaat
		gatcaacaaccgcgatctgcggacattccacgtggatttgaacacgacggtgcggatggcggagtttgtggatgataagcaggttctggtggccgagagcgggatcaaggaccgaagtgatgtgcagcggatggcggcggtggggttcggacgctgctgatcggcgagacgctgatgcgc
		agcccattggctgtccatgccaacgtattaacagcgcccgccattgcggcgcgttcagtcagtgtgccattttgtgcggcataggcccaggcggcttccttgtgtggcacggtgatgttgacgccgcgaaagccttcgtcgggtagctgtttgaacgtggcaatgaggtccgctggcgctacatcaatcgcttcatagctcagttgttgcactgtctgtgcggcaaaggccgcgtgg
		tccgccatcagcgccctccagcccgaggatgaactgcgttgcgttgacgcgtctctcggcgccgccatgcgagccgcgattgacgccgcgcgggaagcgggcgacaccgtcggcggcgcatttgaggtggtcgcgcatcgcgtgccggccggactcggcagccacgtgcagtgggacc
		tatcggcgtatttttcatacagcgggcgccgtctggcatccagtttgagcacgtcagccggggactgaatcaacggacggttgtgaatgtcgtgatccataatcttttgcggatccttatccaaaaagatgatgacgccgttttgtttagtttcgccatgatatccgggttttcgatcattccgcc
		caaccacgagtcacgcggcagagccagtcgttgctgttgcgaaagcccctgcgcccgaagccaggcgcgcacggctgcgcgtgggcaccagcggcgactatgcgccgttctcggttcgcgatgcttccggaattgtgcatggcttcgacgccgagatcgccgctgcgctagcgaccgatttgggactcgagctcgagtgggtgagctttcgttggccgacgctgcag
		aaggtttcaaatctgacgggaaaaaactacgtccggcgatccagcaagcgcttagccttgccgccactgcgctctactccgccctgcgcacgcagctcgacttccgccctggtgccgatatacaccttgatttcatgctgcaacatcgccgctgcggcgcgggctacctcgctgtcgggcatgacgtctgggcgggtttcaaccgccactatcaggctgtccatcggcccctcgcgcaccag
		gacagaatctccggcagccttcatggcatcgatgtgcagcttcatggcaacatcggcaacaggatcaggggtaaaaagctccgaggttgcggcaagggcggcaagctcaattatgggaagatctggcctggttatcttgatcccacccaattgcaccacaaagccatacacgctgatatcaaaatgacgcagcagctcttttgccacggcgccgacagcaaccctggcag
		cgtcgacgccgctcaccgcgtacaagatctccaagatcgggatgaacgcgctcggtcagtcgctcgcagtcgcgtacgcgaagcacggcatccgcgtgaacacgatcatgccgggcctgatggacacgcccatggccatcgagggcgcggccgaggccgcaggcgtgtcgacggaggaagtgcgagcgagacgcgaccggtcggtgccgctgcgcgggaagatgggcacggcgtg
		cggcggtgccgccgctcgagccagcggtgacgcgatcgagcgcgtagggattcttggtgtagccaggcagaatcgagctcagtgtctcgtagggcgtgaacgcccactctgccatattcgatttggcaagcacgatcgcgcccgcccctttgatctgcttcaccagaaacgcgtctttgttcgacacgaagccggcgagcgccagcgaaccgttggcgctttgcagcccaatcgtttcaaagttgt
		gaagagattgctttccttccttagaatttacttcaagcagtgtaccaattataccataatttcctgaaagcctttggtctaatactgcattaaaaacaatctgctggtaagcataatttttttttgtttcgccatcaggaattgaattctcatgactacaatcaatcattacaatgtcttttagaccttgattttttagactaatcaagcatttttctatttcttcaggatgataattaggttt
		attcgggatggaactgcacgccctggatcggcagggtgcgatgacggacgcccatgatgcactcgcgcgcaccgtccggcgtctcggtccaggcagtgacctccagacaatccggcagggtcgaaggttcgatgaccagcgaatgatagcgcgtcgcctggaacggattggccagcccaccgaacacgccgcgatcagcatgatagaccggcgaggtcttgccgtgcatgatcgtcgg
		tgactttcaatcatcacgcccataatgcgtttatcaccgctagcaatttgccctgcgacatcttcgccaacaattaactgacgttggcattgttttaaactgttggcatgactgaaatcaatcataatgttcgggcgcaaatgcgcgtgttccatgctttgcgcgacttgatccacatgaaccgcatcgtaatta
		tggcgctgtggtagaccggcgcgaagagaaagccgaagtcggtcgctttgattatctcggcggtcttttccgcgctgatgtcgatcttgatgccgaaggcctcgtaaaaatcggcggatcccgacttgctcgaaaccgcgcggttgccgtgcttggcgatgggcaccccgcatgaagcggcgacgagggccgccatggagctgatgttgaagctgcccattccgtcg
		cccattctgcaaattcctgagccatccgtatgtgttcacggatatgaaaacgtaacccattgactccataatgtctgatcacaaaccaaagtttaagtgatcgaaacctgcgacctaactggatatgccagttcgcggtaatcaattacagctccactttcagttgcctggttctttaaatattcaggaagaatactcagggttttgattaaaactgatcggtctgccacaaag
		cttagcacttgctgaagagttgttggcagatccgaaagagcgcgcagagcatgttcaactcatggacttgggtcgaaacgatgtgggccgtgttgcacaaacaggaacagtgaaagtcactgacaatatgatgattgaacgctactcacatgtcatgcatattgtctctaatgttgaaggcaaattaaaacctggtatggatgcgattgatgtattgaaagcgacctt
		gaccgagcgaaccgttgtggccgtcatcggcgatgaccggtacaaggaccgcaacgtcctggagagcgtcgagggcgttgatcgcgtcgtgcccatcctggcgccttacaagatggcgtcggtcgaggtcaaaaaagaccgcacgatcgtggccctgcgcccgcaggaccc
		gtagtggcagccgatgccggcgacggcgcgcgagccttccgggacgcgggtcgaggtgttgtgcgggcagccggagcagaaatgcggcttgcgttcggccagcacgatcggcgtattggcggcctgctgtttggcggcgatgagcttcagtc
		ggagttcatgacgctggaacggtattcgcatgtggtgcatctggtctccgaggtcacggggaagctcgagagcggtaaagatgcactggatgtgatcaaggccctcttccccggagggacgatcacgggatgtcccaagatccgttgcatggagatcatcgatgagctcgagcccgtgcgacggggtgtttatacggggtctctcggctatatcgatcttaacggggacatggacctcaacat
		ggtccgccagcaggccgaacatttcgatcgcgccttcggaccacttagttcatctcgaggaattcgcgcgtgcagtactgatcgtactgcgcgacgatctcgggccaggcgtcgctgccgcgctcgtccagcttctgcaccagcggcttcaggcactcggcccacaactgcgacgcggtcttgccgcgctcgtgcggcgccacatcaaatcccaatgcatccggattggcgttggcg
		gcgatcgatcaattaggcgacgacctggaagtggaggcgtgggccgcgcatgatgacgtcatcgagcaggtgcggctgcgcaaatacccattcggactcgcggtccaatatcatcctgagcgcagccgaatttacgactcgttgttcgacgatttcttcacgcgattggaatcgacgaagcgttaacagttgaagcgttaaagggttgaagcggcgccgtccttgtcatgctgagcgacacgaaaacgg
		taatcgggcgtatttttcatacagcgggcgccgtctggcatccagtttgagcacgtcagccggggactgaatcaacggacggttgtgaatgtcgtgatccataatcttttgcggatccttatccaaaaagatgatgacgccgttttgttttagtttcgccatgatatccgggttttcgatcattccgcc
		gggtgctccgatcgcgctggttattcgcagcgctgaccagaaatcccaggattatggcaatctcaaagatgtgttccgccccggacatgcggaccagtcttactttcaaaaatttggcatccgtgaccacaggggaggcgggcgctcctcgggacgggagactgcggctcgcgttgctgccggagctgtggccaaaaagattctcgaacgccagggcgtcagcatcagggcctacacgctcgcgattgccga
		cttgtctttgctggtgagtgcgatgatctaaaagccaaggttgccgaagctgcagcaggtcgcgctttttggctacaaggcggagattgcgccgaaacatttgccgcagcaacagcagattcaattcgcaatcgcatcaagacgatcctgcagatggccgcggttttgcagtactactcaagcctgccagttgtaaaagttggtcgtatggctggacagtttgctaagccacgtt
		cctaattacgatgcggttcatgtggatcaagtcgcgcaaagcatggaacacgcgcatttgcgcccgaacattatgattgattttcagtcatgccaacagtttaaaacaatgccaacgtcagttaattgttggcgaagatgtcgcagggcaaattgctagcggtgataaacgcattatgggcgtgatgattgaaagtcatctcaaaggcggacaacaaaccgttatcaaaagga
		ccaccacaatattggagggaatccggcaaaggaacttttcaatttcagcaatcccaagccaattgcctgtcggattattgggattggctataaataccagcttggtgttcccatcaaccagcgcagccatcctttccagatcgtgtccaaaattttgggcctctgccacttttagtgtcgcacccagagcgttgaccgctatggggtagacaataaacgcgtggcgaga
	Branched-Chain Amino Acids	cttggctgtctcggtcgctacatcgcgccagagctgtgtgcattcgagcacattcatcttgtccaccgagcagaccttcctgttgcgtttgcgcgctgcatcgaaggcgacgcgcacgatgcggcggatctcgctctcggtgtaatgcatggtattgaagccatagcgctcgccgtccctcatctcgatgccacgcggctggccgaagtagatgtccccgg
		tcagcacagtgtgcattcaccatatattcaacactatcggcaatcaaatcacgactaggcaagctgtaaagcataccgccatgacccatcgcaattccgtcatcaacagcaatcgtattaaattctttagccacaccgcccactttttcaatttcgcgcgcaactaac
		gatgtctcccgttatgtgtacgagctggccaatatatcgccaaacaaacatcaggcgtatgttggcaattctgcgtttgcccacaagggtggggtgcatgtcagtgcgattcaacgccatccggaaacgtacgagcatatgcgtcctgaactggtt
		gactcaaaaactcatcaaatggttttgcatcttctgacggcacctgaattccaaccatgacgcgcccataggcagcgccatggttacgataatggaacatggatatgttccaccggccacccagaagatcgagaaatgtcatcaatgcccctggtcgctccggaaattcaaagcggaaaacccgctcgtttctgacctgctcgct
		gccgattgtcctgccttccgctgtggtggaaagtttaatgcaagaagtgagaaataaaccggggacaaaatttgacgtcgatttagaggcgcaaaccatccagactggcgctggcaacgcccacaaattcgagatcaatgaatttcggaaatattgtctcttgaatgggctcgacgatatcgggctcaccctccaacatcaagacaaaatcagcgcttacgaacaaacccactaaaactcgtcccggttc
		aattgcactggcatgtagaccggctttgtgtgcaaatgcagatacgcctacatatggttggcgcgcacttgggttgatgttggtaatttcagcgaccgcatgagagatgcggaatgattcacggagtgcgttagttggtagaactaacttatctttcttaagttccaggttggcgatgatcgttacga
		gggtcgctcgagcacctaaccgttcgatgtattacgcaatgggttacgaagaaaaggatttcgtaaagccaatggttggcgttgcgaatggtcactccacgatt
		ggccttccttgtggtcttcgctggcgaagcaggcctcgaccatcttcatcgccttgtccaggtcgcgctcgggttcgctcttctgccactgcagcaccgcgaacttggccgcggccacggtgagcggcgcgttctccgccaccatcctgcagtaatcggccaccgctttgtggagctcggcggcgggaacgaccttgctgacgaaacccatccgcagcgcttccttcgcgtcgaacttgcgcgccgaggcg
		gcgaattcctcgacaaacttggctatgcgcattgggacgaaagcaataacccggcgtacaagctcttcctcggttaattctatttggttatatttttgtgattattcattctttcacagaataaacagggccacctagactccagtcatccgagtttttactcactttgact
		tattcctgatgatgtcatcatccaagtacttacacaggcccgcgaaccgcttatccgtcgcacctatgaagcaatcaagggttcaaagcaggcaattgttcacctttacaactcgacatctactttgcagcgccgtgttgtattcggccttgataaagaaggcattaagaagattgcaaccgatggagctcaactctgtcttgatttgatgaagacaattccagagaccaaagtttcatttgaata
		gaagatgagtggcgcaagttcactcgttaaatcacttgagtctgccggcgtcgatgtgatgtttggaattccaggtggtgcaattcttcctgcttacgatccaatttttgatagctctatccgccacattttagttcgccacgaacaaggtgcaggtcatgctgctactggatatgcccaagtaacaggtcgagttggtgtttgtattgcaacttctggaccaggtgcaaccaaccttgtaactcc
		agtcaggaaagttgtggatcccgatacaaaccggatttatgaattttgttgtgacggcaaacccggccctgtgtcgacaaaattatacaacaagctgatttcaatccagtatggcgatgaacccgatgtacatggctggttagactttctcgtataataaaaata
		catgtcagaaactattccaccctcagttatagattcaagtgcattagctgcttcagcattaatagctaagtcaactggataaacccatccaaggtttctaggatcaacgtcgatctgaataattttttgatcaccgggccgaataagatcaggatccctaaatc
		gaaaatctaaaagaagaaaacattgtcaggttcatgattcccgatactcttggtatcctgaatcccgatcagacctttgaattctgtaaaaaatggtcgacaggtatcctgatctgcattttgattttcatgcccataacgattatgatcttgcagttggaaacgtattttcggctgtaaaagcaggggtgaaaggaattcatactaccgtgaacgggctcggtgaaagagccggtaactctcc
		ggatctccagaggtggtcggtagacccataacgtgatctgtttcgattttaactaaattcatatctaaaggagaagtccctacatcttcagcggtgataaaacgtccacccagtgaatctacatatcttccaaaggctctccagaaagcttctcgtttaac
		gcacagctggaaaactggacttcaattataagaaatgcgattatataagaagttataatcctcacttaccactacacaccaaagcaattgaatcagcagctatcatgattaaccatgctgagaggcctatcatccttgccgggcatggaattctcttatcgcgggctgaaaaagaacttaaggcttttgctgagaaaacaggaatccctgttgctttaacattgcttggattatcaggatttccttccg
		caccaaccttgacatcgaaaaggccattacagatggcattttccgcgaggatctctactaccggctctccgtaatcccgatccatctgccgccgctgcgccagcggcgcgacgacgtcccgatcctgctgcgtcatttctgcatcaagcatggtgccgac
		tgcagatcttggcggcttggccattgccgctggctcccgcatgcacaatgttcttgcccat
		gaataatctggtcggtatccacattctctatgggaagcggaactgctggtgataaaagggttgtaaatttatcgtaagacattgctgtgtattttaat
		aggattaacttttgttcatccttatgacgatcctgaagtgattgctgggcagggtacgattgcgatggagattttgaatgaacatccagagcctattgaagctatattttgttgcgttggcgggggcggcttacttgcaggaattgctgcttatgtaaaagcactacgcccagaaattaaagtcattggtgtagaggccaatgatgcagatgcaatgacgcaatcactcaaagcaggtaag
		cgtcactcacgatggaggggcgcttgacgctttgcaatctgtcgatagagatgggtgcgcgtggcggattcattgctcctgacgacgtaacctttgaatatttgaaggggcgcccatacgctccgcagggagcggcttgggatgctgcggtggaggagtggaagacgctttgtagcggaccggatgccgtttttgacaaagaagtgaccttcgatgccgcagagattcaacccatgattacttacggcacg
		ttccagctcagccagcgcacgtcttaccgccggccacagagaatctgcacgcgcagtgggctttacgccatgcgcagttcgaattaccagctcatcacccaatgcctcgcgcaatcgcttgaccgcattcgataccgcaggctgagtcatggccagcctgccggcagcgcgcgtcaggttttgttcggtcattaccgcgtcaaaaacccgcaataaatttaaatccaatgtgaggaag
		ggcggcttcggcgggtaaccatgcccagggcgtggcgctgtcggcccagaagctgggttgtcgtgcggtgattgtgatgccgaccacgacgccgggcattaaggtgaatgccgtgcgttcgcgcggtggcgaagtggtgttgtttggcgattcttatgatgatgcctacaacgaagcacgccgtctggaaaaagaagaaggcctgacctttgt
		ccgaagtccccggacaccgacgttcgcgaggtgttccaggagggcggaggcgtccccggcctcatcgccgttcagcagaacgccaccggcaacgccaagaagctcgcgctctcctacggtcgcggcatcggctgcactcgcgcgggcgtgcttgagacgaccttcagcgaagagaccgagaccgatttg
		taatgtgttcgtgaccattgacctgcacttttgcagtttccttttgttttacagtcttcatattatcaattttctatattagcctgattgcacccagatcggctgaacttacgtttgcagcatatgctctgagggacgcagggtattattctgtttctgtttgccggtttataggctttatcacctttcgatttctcttctttttctctcttcatcagttcttctgttg
		cacagtcaaccaccttggccttgtagtgctccgcgatctgcaagatctcagtgcgcttgttgacctcggccctcaacttgatgagcgcgatctcggtctccaccaccgattgtccggtgtggtcgatggcgcgcaccacgtccaccagcttggccacctgaaggatcatctgtttcagggtttcggcggcgccccggcaggtgatggtcatgcgcgagaaacccg
		tggttctgccggtgagcgttgcatggcaatctcggttgtggttgctgttgagccagttgccgatgaactaattgccaaggtaagtgagcgcatggctcaaatcaaagttggagatggaagaagatcctgtgacatggggccgcttgtcacaaaagagcacagagacaaggtggtttcttacattgagattgctgaaaaggatggcgccaaaatagttgttgacggaagaaccgtcgttccagacggcg
		ctttgcaaaatggttcgacatatgacggccaccactggcaacatccgtagccttggatatcccgttgagaataatctcttcagcgcttagccccgccgaaagatttgttaataaatcgcgataatatgggaacagatggtccgtttctttattgaagacctgtccaatggccagttgaataccgtcatgtcctgcatatggtgcatgatacgaccaaccaatagcctgtttcaggtaatttggagcacg
		ttgaaaagcggaaatgatgtcgagcttttgatcattcaaatggcctgcgcggatggtcccgccgtagatcaccaacgacggccggttgagccgtccgatgccgatgatgcatccaggcatgttcttatcgcatccgggaatggatatgttggcgtcataccactgggcgctcatgacggtctcaatggagtcggcgatcaggtcacgagactggagggagtaactcataccgt
		atccgccggggagtacgataaatccctgagaatatcgcatgaacatggtcttccttacgaagaaataatcgaagcttatgagcttgtcaaagtcaataaaagaattgggccgctgttcaaacggaagatcaatgttgattccgatggatttccctttgccccgctgggccccggcattggcagcttccataatccccgggccgccacccgtgataaccccgtagcctaactgggtaagccggaaacc
		gcctccaaaaaggcgtcgttcttggactggtcaccggtgagctcaatcgtgtagctcttgtcagtgacgtcgatcacacggccacggaagatgtcggccatgcgtttcatttcttcgcgttccttgcccacggcgcgcaccttcaccagcatcagctcgcgttcggtgtaagcgccttcggtcaggtcgaccaccttgaccacctcgatcaggcggttcaggtgcttggtgatttgctcgatcacatcg
		tactcggcattgttggaaatgccgtagttcatgttggcaataccgccttcgtagatcaggtccacgatgagcttgagctcgtgcaggcactcgaagtaagccatttcaggggcgtagccggcttcgaccagggtctcgtaacccatcttgatcagctcgactgcaccaccgcacagaacagcctgctcaccgaacaggtcggtctcggtctcttccttgaagttggtctcgatgatgccgg
		gggccccgaggtcactaagcacgccattgcagcacttgagctcgcggctcctaacattagctttgttcagaccgagtatgactttggtgccagaaggtataaccagaccggtgaagcgctaacagaggcagatcttgagcaattgggcaagcaggacgtgctcttgcttggtgccattggtgacccaagtgttccctccggcattctcgagcgaggattcttgctaaagcttcgctttggcttt
		ctgcgttgtcggatttgctgagcgccgccaacggcttcaagaaagactactccgcgtggagagcgcacctggagcgccttcgcgtgaagcatgcctacgactacgatcggacgagcgaactgattcagccgcagcaggtgatggaagttctcaacggtattgtgaagggtgatgccattttcacgactggagtgggacaacatcagatgtgggctgcacagtat
		cccgccgacgcggtgagacggctgcagcggccgcctaacgacccgcctgcagatccttcgcgctgacgccgagccggcgcgcggcgctgagcacggccagcaccgaagccgtggcgatgttcggatgacggccggcgccgtaacgaattcccttcactccatcgcgcgcggcctcgacgattgcgagcgccgaggcatcggcgcccgaacgcagtgcgcgctcttcgtagttgtcgatgcgga
		ggcatctccatcaccgagaacatccccagccccgagaccgccacctccgacgacgaccgcgccggcatcatcgaggccctcgcctacatgaagctgcccgccggcaagcccatcaagggcaccaagatcaacgtcgcctttctcgggctcctgcaccaacgggccgcctctccgcttccaagaggtcgccaaat
		ctacgcccgcggacttggactcaatgtccgctacacgcctgaggacgccacccgcaccgacttcgagtttttggttcaagtctgc
	Glutamine, Glutamate, Aspartate, Asparagine; Ammonia Assimilation	ggtgatgtctgccggcaaaaccggctcaatttgaggatattgctcataaacggcaagttctgtcgccctgagtgcagagtagattttccttactgtatcctttaaacggtcaagtgtcctgtcacctggccatatacgttgctcccagtcccactgatccacataaatggagtgtagtgcagtaaaatcctcgtc
		tctttcgtgggtgctgcaccgccacgatcacataagcatggccgcctcgatcgagatgcgggttccatttctcgagaaccgcctgatcgatttcggcatgcacatgccctgttcggtcaagctccgccgcggccagggcaaatgggcgttgaaagcagtggcgctcgaacgcctgccacaggacgtcgtttacgcccagaaaaaaggttttccaatcccgagtgcctacacggaaggcaccgagcgcatg
		ccatcgattcggtcggcacggaccgcctggacctggcctggtatatcgaggccgggaagcggctcagcgatggagagttgctgggccgaattccggaattgaaagacatcgcggccatggaggaagttccattccgccgcctgcccagccacgccctggtcgacaaggactggctggagctgctgcgcaccgtccacgcgattttcgatgactatcggaccgacggcattgtcatcacgcatgg
		gcacccgataccccgatcggaagaattgggggcaactggaacattgattgggaagaatttgatgcggctagtgcagggggatttaaaattgattattttaaatagcccacataatccgacgggtaaagtattttctgaagaagaaatagatagaattgcctttcatgtttttaaaaaaataaagcc
		gcactggtgatcgcaaatatgaccggtaatggcgggcagagcgttgcgttggtagatgagttccagcgcgtcggcatagcggtgttcgccaagcagacggatgtattccggaatatcttgcttgatagcgcaggcagtaacacagggggcaacgtagcagtcggtcagcggcaggtcttctgccacttcaatacgctcttctggcttccagtgtttctgggtgtattccatggttaacgca
		tgccccgactcgtcccactccggcacgtcgaagccgatcgtgaacgtgtgcacgggcgtcgacgacatccgctgcatccgcgcgacgatgagcgacgagtcgatcccgccggagaggagagccccgagggggacgtctgactcgagccggatcctcacggcgtcgtcgagcagctcggccagcgcgctggtcgcctccgcggggtcgatgatccgcgagcgcagtcccgcgccgccaccacccg
		ccgtccacttcacctcagtgactggactcttcgcgacccgctctaccatgtcccgctcgaacagatcctcctcgtcgccgcggacatagtacggtcggacttctctgtatttactagcaagagtgtagacgatcgacgagtccagtcccccgctgagcaaacacgcaaccgggacatccgatgactcgactctccgcttcacagctgcttctatctcagtcttgagctca
		ggcgcgcactgccgtgatcgtattcaacggcgagatttacaacttccgtgagctccgaaacgatctcgagcaaagtggccattcattccgcagtc
		cggtcttcgccagcgacgcttccgatagcagcgcatggacgaggtcagaggtatcggtccgcaaccacgattcgagcggggcggtcatgcctcgcttcggtctggcggcgatggagtcgggcaggatcccgcgtagagcccggcgcagaatcgccttctccgtcagccccgccattttcaccttgggcgggatgttggcgcacagctcgaccagctcgtggtccaggaagggaacccgcgcttt
		atattgtatcaagcttggtatggatatttagtagtttattatgcgatggataatgaatagcatcgtaatgataattaatgtggatacctgcttcggctaatgccggataattgggcgattcaaagctgcgaaatgttctgcattgtatttcccgtgtccggttacc
	Histidine Metabolism	ggttgtatatcaggtacttctggaactggctcacctgttcgtcggtaagcacgatctccgaaaattcgccgatgccggtattgaccccgtacatcacctcgcgggccgcgatctttttctcgatcatgccgcggcatttcctgatacgctccaccgcttccgggctgagctctattttttcgccgtgccgggcgactttgaccacgtcctctatcttaagggc
		gatacgcttttagtgaaagtaaagccagttggtccaacttgccacacaggtttagatacctgttggcaagaagttaataatcaagaatttggatttttatcgaaattagaaaatacgattgcaacacgcaaagcaaatgccgatgcggagaagagttatgtagcttccttatttgcaaaaggaattaataaaatagcacagaaagtaggagaagaagccgttgaagttgtcattgaag
		gatctgcaaacttttaaatttcccgatcaattatcgggagaaatgctaggcatacgcgcagatatgacaccacaagtggc
		ggttgacgacttcggtggcgatacgtttgccttgcaaatctttcaccgatttgaccttggagttttccggcacgcacaagacccatcgagccggttgccg
		ggcgcactgatcgccgcgctgctggatttaaatgggccatcggggatcctgactcaggcccgcgatcgattggcggcgggtggtcaggttatcgccagggcgctggacgaactgcaaaccatagtctcgcggctacaagagcgctttcccgacctgccactgaacatcgatttggccgaattgc
		ccgccgagatcgtccgcctcatgctcctgctcaaggtcaacggcctcgccgtcggcctgtcgggcgtcacgccgcgggtcgtcgaccacctcatccgcttctacaacgaggacgccctgcccatcgtctacaccaagggctcgctcggcgcctccggcgacctcgccccgctggcgcacatggtcctgcccctgctcgggctcggcgacatggactaccggggacgtcgtctcccc
		ctgctggcgtcgtgcgtgcgatgattgagcatgggttgctcgcacaggaaggggcgcgggctaaggttttttatattggggcgaatttccgatacgagcggccggcttcgggtcggttgcggcagcatcatcagtttggggcggaagcgtttggtacgcc
		cgggcgcgggctgttcgatatggatacgctaaatgcgatgcatgaaaagatgcataagcacctggctagcgtcggcggccgtatcgacgccatcttctactgccctcacactgccgatgaacaatgtgattgtcgtaaacccaaaccggggatgtttgagcgcatcgcccaggtctacaacatggatctaaagggtgtaccgacggtcggcgactcgctgcgcgatctgcaag
		cagtgagtaaggcttgcattcctaggcatacgccaataacggtttttcgttggcgacttgtttgacaatgctatctaaacctgtttgttgtaaggcgtgcatacagtcgcggattgcgccaacgccagggaaaacgatgcggtcggcatttagaatttggtttttgtccgcgctaacaatcacgc
		atccggggcggaggccatgctggcgggatacgcccgggcgttcgacttccccggcttcgtgccggcctacatccgtccg
		atgggattatgcgttttgccagcatgcgatggcctccttcacggtgaatttaccttccagtaatgcccgaccaactattacgccgcgcacaccagtgccacgcagggccgccacatcatcaatgtcgccaataccgccggaggactgaaatgccacctgcggatatctggcgcacacttcttcatataaagagacgttagagcctgccagcgtgccgtcgcgcgagatatcggtac
		cagtggacgcaatgtttcgcgcagaggtaaccaacttggccaactcatgacaaattctccaagcgtgctgtcattgcttcaccatgtgccggcagatcctctgaatttgccaaggtcacaacggtgtcaacaatctcggtaaatgccttttggccatactcaataaagtgcaatccacgaagaaaggtttgaactgaaagtccgcttgagtgacatgcgcagccacccgttggtagaacgtgatttg
		ggacgtgaaggccgcttcgggcggctgggaagtgcgcacgcatggatcccgcacggccacgggccgcgatgcaatcgcatgggctgcggaggctgtagaccgcggtgtcggcgagattatcgccacatcgatagatcgcgatggcatggggagcggcatggacatcgcattactcgaatcactcgcgcacttaccggtcccgatagttcttgctggagggtactcctcaccacaaga
		cctacgatgccaaggtcggcgctgccgtattcgacataagttggaacatcagttgcccgcacaatcatgtaccgaatccgttgttcggcattttcaaagatcagcttgcgggaatcggagagcagttcgcggcagtctatgccgatccggccgaatagctcgactgattcttcc
		ggtcgcgatcatcgctcgatgcggtgatgtccagaaaagtgagttcatctgccccctgcaggtcgtattgacggggcaatctccacggggtcgcctgcgcg
		tgctgcttcattttgtcagccgttcgggtattgatctccagggctttgccatggctggccagccagcggaagatcgcgtcgaaggtctccggagcatgcgcatattgcaggggcggccgacccggggcgtagcggctgacatagtcgaagtggcccagaatatcgaaatccggacagtcctggatcatatcgagcgtcctttccagggtgcg
		atatctgaatttcgtaaataatatacttctaaaggaaaattggaagccgtgactttgagttggtcgtttccattatacactgaaattccacaatcttttaagatttgaatactttcatcgtgaaggcgacctgatttttgaatagcaatttttaatgtgttcatttttaatttttgttttaaaaaagtacaccaagggattttaaaaa
		atatgggaattccgatccagttgattatattcgttcgctgtggataaagcgtgttcgttgcgcgcccacgcccggcgcgagacgccggccatcacgtcaaacgccatggcggattccagaatttcatccacacgagcgctaccgtccaagaccatgccaaagccgccgttaatggcttttccgatcccgacgccaccgccgttatgcagggtaacgagcgtcatcccgcgcgctgcgtttcccaaag
		gctcttgccggtccatgcaatctctccatcggaaattgcgatggctgcctgctccacgatgtgtagatcgcgcatcgcagtcccgcgcttcggccctgggccgagtgatgttgccaattgcgaaattcccgttaccagcaagtccactttcatcgaatgctcggcaggtcgagtcccctttgtctggctatcgcttttgcgagttcataacctgcgtcagcatggcgcataacccc
		gatgagcatcaatcctcgaccattaaccccccctaaattaagttcaagcggaaccccataggttaccgatgccttcgcgatcttatgggcaacggcttgggcgtgttcgtcccaaccaccacgatatcccaacatatataagtctggatgagcaacatatgcgaatcgccc
		actgacgaggtgatggctactcaatactcgcgcgaagctgatgtggcgctggcgctgaaaatggctgatgccgccgacgtgatttcgatggctcgttatcaatctcaggacttagtaatcacaacaaaaccagataacactcctgtcacagatgctgacaaggcaacagaaaaagcactgcgcgacattcttgctaaagagcgcccagatgatggattagtcggacg
		ccgaactttttgatgaggatggggaagctttgcgtcgtatcggtggcgaagttggtgtgactaccggccgaaatcgtcgttgtggctggttcgatgcagtgattgctcgatacgcaactcgcgtaaatggtttgactgatattttcttaaccaagttggacgtgctttcggactgggatgagatcccggtttgtgttgcttacgaaattga
		gcgtacaccacgcgggtcggcggcgggccgttcccgagcgagctgccgatcgacgtcccggggtcgatcggccaccacttctcgacagtcggccaggagcgcggcacggtgacgggcagggcgcgtcgctgcggctggctcgacgcggctctgctcaagcgttcgatcatcatcaacggcatctcgggtctgtgcatcaccaagctcgacgt
	Lysine, Threonine, Methionine and Cysteine	aggttgagtgaggttcagcaggtcattgttgcccttcaggtcctgtgtcccggcggcgaaccgttccccacgaaagtccgcttcgttaagcgaatgcgcctggatcatggtgcccatcgcgccgtcgagaatgacgatgcgttctttcaggagctgctgcagccgctgtgctttgtccaatgttgtattcacgtcaaaaagtgtattcgcatgcttttccggccgggcactcattgcccggccgcgtcaa
		gcggcaatcgcggccgcggcgcggctccgcatctggaagcgggcaacctcgctggcggggtcgagagttgtcgagcaccgctcctcaagcgaggcgccgacagtccggtgccgctggacctgctggggctgtcggtcggcatcgaggaccccgacgatctgatcgccgatctcgaagccacgctgagcggttgaataaattcgtgatgtatccggcaattgctgcgtgaaacgcttcg
		tgttcctccatatacaacagcctcgttttgatctgcatccagctcaaaagcggtgtgtgcggccttcgcaccacgctctagatcagattcgcggcagataattgaaatacgaatctctgaagttgaaatcatttcgatgtttacacctgcatctgacagcgcaccaaagaatgtagctgttacgcccgggtgtgagcgcataccagcgccaactaatgacaatttaccgatttg
		ccggttcgggccagttgaagccggtgccctggaccaggagtactttctttacgcggaggaagtcgcggacgaattccttgt
		tcacaagttctcaggcgggaaacaccccggtggacagataccgatcgccgcggtcgcacaccacgaaggcgatggtggcgttctgttcgcgtgctgcgatctgttgtgccacccagcaggcaccggcggccgagatgccggcgaagataccttcctcgcaagccagcctgcgacacatatcctcggcatcggcttggctcacatagaccagctcgtccaccgtgctgggatcgtagatt
		gaggtgagcgtcgtcacgtcgtcgttgatccccttgagcagcacggtctggcttccgagcgggatgccggcgtccgcaaggaggttgcaggcagccctggtttcgggtgtcagctcttcggggtgggtgaagtggatgctcatccacagcggctggtacttcttcagtatcctgatcagcttcggcgtgatccgctggggcagtaccaccggcaccttggtgccgatgcgcacgatttcgacgtgaggg
		gccattgttcatcgatgatcggcaacacctgacgcagcaagggatcattggcgtcaccgcgccgcatgcgggcgacaaaactctgcggtacccgcagaggaaaacgatcgcgcggcagatcaagcacggtgtcggcgagccgatcgagatcaagcaggcgcagcaacgcacgcggatcatcaatggcgtcgcgccattggcgacgccagtctggcgcttgggctt
		ccatatgggccccggtaatgacatcgcagcagcctgttgaagtaacgaagatatccccctcgcccaccgcgtcatccatgatggtcacttcatatccttccatagcggcctgaagggcgcagatcgggtcgatctcggtgatgagcacgcgagccccgaaaccgcgcatagactgggcgcaccccttaccgacatccccataaccgcaaatgattacgacctt
		aagtaaatcctgagaaaatcgctgattataaaaatacgcggtattatcgccaatccgaattgttcaaccattcaaatagctggtggcgttaaaacctatttatgatgcggtcggtattacgcgcattaatgtttgcacttatcaagcggtatcgggtacaggcaaagacgctattgaagaattgggcaaacaaac
		gccgtggcgagccattccaccgtaggtgtcaacaatgatcttgcgtcctgtaagtcccgcatctcccattgggccaccaatgacaaagcgacctgttgggttaatgagcgtgcgcatatctttgcgaggtagatcaatcttcgccaaaactggatcgattacctgagcaataatctctggagtcaactgcttgatgacatctacttcttctgcatgctggcttgaaataacaacggta
		agctgataaaataggatcagggtgccggcgaccagggaatgatgtttggttttgcatgttccgaaactgataattacatgcctctcccactcgaattatcgcatcttatcctcatcgaactggctgttatccgccgcgacaaaaggtgatgacctatcttcgtcccgactcgaaatctcaggtgaccatcgaatacaatgatgacaattcacctaaaaagggttcataccattg
		cattttcgagtacggtcagcgaggagaacagcgcggcgttctggaacagcacgccggtattgccttcaatgaactcccggttggcggcatcagctgaaagtgcatcacggccgagcacgcggatgcggccggcctgcgggcggtgcagcgcgagaatgctgcgcatcagaaccgatttgccggagcctgagccaccgacgacaccgatgatc
		ggccaggtcacgctccgcttcactaagcgtcggcacttcactggcgagcgcaatgccgacgccgtggacacccgcgccgatcatgtactccacttcgcgccgcaatgtctcgcagtcgatcgcgccggcctcgtcgtacggcatggccagaatcggatagacaccctgtagcggctgcgcggtcatcggccggccaccgcggccgatgcgccaatcgcgatcgg
		tgccggactacccaatgcgtttggcggttacgacgaaacgccggagatgctggccgaagatatccgcgaatgggccgagcatggtctcgttaatatcgtgggt
		gagacccccgactggatcgtggtcccgggcggcaacctgggcaactcgagtgcattcggcaaagccttcatcgag
		tggtttttaatttcattttatcatgaaaacaaaaggcccaactttatttcttgcataaccgaaatcggaaagtataataacacagctttctttacccattcgtttacatgccacctgttcattacaggttctgcaactcttaattcgcctttatcaagtttttctattacaaactcaattgcttgtatcacatctgggtaagtcagcatatttct
		agtcgggtaaatagtcggtttcggcggtggcgtttaaaaatacggttctgcccctgctaataatgccgcgccttcgtaaatttgataaaacgggttggggcatg
		ccgcagtacgacacaaacgacaaaatcttgccgcctgacttgtgcacctcttcaatcgtcttcaccg
		tccaagtcatttagttcgtccatttccaagcagtccatatccgatcttaaaaggatagttttttcccggatacttcccccgtaaagttgccactacaccagtaacgccaacttttgtcctaacctcaagtcctaaggctttgagcttacctgcaaccagctcagaagttctaaactcctgtaattgtggttcaggatgggcatgaatatctcttcttatgcagatcaattcatccttaatagtctt
		ccactacagtatatattctaactaatccgccccgtaattggggcggttttcttttttgaattaagttcttttcaaattccgtaattttttaaagtaaaacaaaacgctgttaatttctgttacttttgtacttcaatttttaattctaaattatagtacttatgaaagttgctgttgtaggcgccacaggtatggttggtgaagtgatgcttcaagttttagcggaag
		tcgcgcaagttacagttgaaacaacaggaactatgttgcttggctctgaaatcggtgcagcacttaacacattagagccaatgggaatcgatttaatcggtcttaactgcgctacaggcccaacagagatgtcagagcacctgaggtacctgagcaagaatgcaaagatttcaatttctgttatgccaaatgcggggttgccagttctcggagcaaatggagcttcctatccat
		gcttctcaacagccagtacggtggatggactacaggcacgcgtgcatgacattctggatcgtcacgaactggaatatgacattcgctggacactgggcggaaagcccttcctgacgccacggggaagcttgtgcgatgcgttttcggcagcggtgcaggaaacgcttggcatcacacctgagctctccactacgggaggtacgtcggatggccgtttcattgccgatatttgt
		ggtgtagatgcttctgttgttgaagagcgtttacgcaaagacacgggccatgagatcaaagctgtttgcgtagtacacaacgaaacttctactggtgtgacatcaaacatcgcagcagctgagacacgcaacaanggggataggcaaggcacacaggggatagg
		accatgcgctggcaatcgtcgaacgaacccgcgacggcgagcgtgcgcacgttgtgtccccagcaggccagttgctgcgcctgccgcggcgacacgaggcctttcgggtacagcacgacgacgtcgacccagggccgcttgaagaacgcggccgcgacggcgccaccggtgtcgcccgaggtcgcgacgaggatggt
		gacttgcattctcaggcttgatgaaatcatcatgctgagttgaaataacaatggtatcaattcttagaggtttgtgatcatcagaatattctaaagtcacttgactctttgcatcaggacgcaaatacgtaatttcagaattctctctgcgaatcgctgccaactcttccaatatcaaatgcgccaacatcaagggcaaaggcatgtagttttcagtttcgttatttgcat
		acaagggccaggaatatttagatatgtatggggggcacgctgtgattagtattgggcatacacacccacattgggtaaaacgtattgaacaccaattgcacgaaattgcattttattctaattctgtagtaatgcccattcaggaacaactagcaatggcattaaatgagataagtggcaaaaaggattttcaattattcctttgtaatagtggtgcggaagcgaatgagaa
		taattgaaaagaatttagtacgcttgtcttgtaggtttttttcaaactccattacttcgttgaactcttttcgattaaggtggtacattgctttgtattccttttcggatttaaaaaaacacatacggcatccacccctacgcatataaacggggaatttagggtgcaatccgtaaaggttcaatatatcctcgcaatcgcttctatccaacccgttttgaattaatggatatgtgtagtttatgtttggcattttttcaaggttgcccgtgcgcccttgctcgtcaaggttaaatccaatca
		ggtgggggaccggcggcacgctgaccggggccgggcaggtgattcgttgcgcgcgccccgagaccaagatcatt
		gcaagatcagctccggcgtggcgtgttttggctcgccaatgccaaggctgatcggcttgaaagccgggttgggggcggatgtctttggtgagagcgcgcagccgctcgaaggggtaggggtggagcctggccagcagcgggttcatcgagcggattatccgcgcaggcccgtgtgcatctcgtgcgacggcagtgcgaccacgggctgcggcttccagcccttttgcctgtgctcggccaccacgttgg
		gatccaaaggtttccaaagtttcagtggtgggcgtaggtatgcgttctcacgttggtatcgctagcaagatgttccgcactttgtcagaagagggcatcaatatcttgatgatctccactagcgaaattaagatctcggtcgtcatcgatgagaaatacatggaattggctgtacgtgccctgcacaaggcatttgagttggaccagaagtaagtcaaaaagcgcaataaacccctcgg
		gatctcgacatcaggcacatgacgcgcagcggacaatgcaaaacgtgtcagcagcgccgcagtgatggaataattccctgacgcgaaaacactgacctgaagggccagcgcctgctgctctatatcgagaaaatcatcggcagtcagtccggaggtacccaccaccacgttc
		cttcttgtagaggtttttgtaaggtttgatacataatcgttgatgaattattttctgaggttactaatcatgtcttgagtcaatttacttaaatcaaattccggtttccaaccccaatcttggtgcgcacattgatcatctatggaggctggccaagaatcagctatggcttgtcttgggtcatgagatgcgtattttaagtggaaatgaggaatgtgctttttgatttcatcagccaacatttcaggtgt
		tagtctcgcgaacttggttcgtaatacttccgcattgattttgagtgacgaagtctacgagcatatggtctatgacggagcgcagcacaacagtgttgcctcccatcccggagcttgcagctagaagctttctgatctctagctttggcaagacctatcacgtcaccggctggaaagtgggctatgtagctgcaccaccggcactaacaaaagaatttcgcaaggtccatcagttcaatgta
		gtactcctcaagagtctctcccttccaggcaaaacaggaataccactcgccgctattgcagctgcagcatgatcctgagttgagaagatattgcaactggcccatctgacatcagcacccagctccgacaaagtctcaatcagcactgctgtctgaatagtcatatgcagtgatccggtgatccgt
		aaataagcctttgacttcacgcacaacattacgtgcgataaattccggcgtatcttcatacatatgaatgaaaccatgcagttcacgcagaatgtcattcggtatgtgacgtgatgtacgcgtttcgccatgcagaaaaatcgggatttcagcattcttgtaacgaatctcttcgacaaagccacgcaattcggcaatcgtcttttcttcgtcattcaatagctcttcatcatccaccga
		taatacctttgcgacaccgtggattcaacgccccttgaccttcggcattgatattgtcattcattcgattactaaatatatcggcgggcattcagatattattggcggtgcggttgtggttggggacactcctgcactcgccgaccgtttaaaatttattcaaaattcaacagggggtattttgagccccttcgaca
		cacgaggagcacatggaagtggtccgcgcgactgtcgccgccgtgcgcgggcgcgtgccggtgatcgccggcaccggttcgaactccacgcgcgaggccgtcggcctcacccagcaggcccacgccgccggagccgatgcgatgctcgtcgtcgcaccctactacaacaagcccagccaggaaggcctcttccagcatttcgcggcgatcgccgaggccactgaccgcccgatcgtgctct
		gtcatcctcaatcagatcatgcaggaaatcaaaaaagacggactatgtcattcaggaatccctgcgcctgggacataaagtcatcgtcggctttcccaatttcgcgcatctttcggacgcgcttgaccctgtttctctccggtaaaaccccgatcaatgaagcgctgccctattatt
		aaaccattttttggcgagatatcctgcgtaaatatcgccaaaatttccactaggaacgctaaatgaaacttggtttttttcattacagcc
		gccgcgcagcagggcgtcaacatcggactggaagccagcgtcggcgggaccatccccgtgatcaagacgatcaaggaaagtctcatcgccaaccggattcaatccatctccgcgatcgtgaatggaacctgcaattttattctgagcaagatgacggatgaaggcggatcttttcagaccgtattgaaggaggctcagacccttggatttgccgaatccgatccgacgtatgatatcgagggtatcg
		ggtgggcgccatcggcgcgccgcacgcgatcaatttccctgtgatggagaaggtggtctacggcaacatcggccttcgcggcggcatagctcccgcccgcgcgtacattcccgaattgctcgacgacgtcctcgaggatcgcatcaatcccggcagggtcttcgacttcgagactacgctcgacggcatcgtcgaagcgtatgaggcgatgaacgagcgtcgc
		cgggatattggccgcatttggcgcgttgccgaggcgctcgagtttggcatggttggcgtcaacaccggaatgttctcaaacgaggtcggtccatttggtggggtgaagcaatcgggcctggggcgtgaaggtagcgcttggggaattgatgagtatttagaaatgaaatacgtgtgtgttggtctttaatcaatggggagtcatgcaatgcgttctattaagaatgtaatttcaaaga
		agctgtcggggatagtgacgggcgcgctcggagagcccgaccaccttcagcgcgattcccgcgcgtttgcgtcgttcggctttcgacagacgcgtcaggagcagcggtaattcgacgttccgctcggccgtcagcaccggcaggaggttgtagagctggaacacgaagccgacgtgtctggcacgccagcgggcgagcgcgccgccaccca
		taactgtttctgtacgcccgtattgcaacagcccatggcgctgggtgccgacatcgttgtgcattccgctacgaagtatctggatggtcagggccgtgttctgggtggtgccatctgcgccaacaaagccatcatcgaaaaggtgtttgttttcctgcgcactacggggccgaccctgtctgcctttaacgcatgggttctgggcaagggcctggaaacgctgg
		cgctttcatctgatagcaagcttgatgcaacggatactgagcgggacgcatcaggcacataaactactgggccatcgtaatgaggtgcaatcttcactgcggtatgcacacgagaagttgtagcgccaccaatcatcaatggaatttgacgttcacggaaatagtcgtcacgctgcatctcttgagcaacgtacgtcatctcttccaaggacggagtgatcaaaccag
		cgtagaataaatcatcgaatcccctgaaaataggatgtttaggatcgttcttggtatgtctgaatactccgaacatctttttctcaagagggtatttt
		gcctttcctgaatgcgccgacactctcggagcgcggcttgctgaaggtaccaatggccttcgtcaacggtcagtggactttcgactggccggcccttgagcaagcctgtgcgcagccttcggccaaggtattgttgctttgcagtccctacaacccgctcgcccgcgtcttcacgcgcgaggagttgttgcgtgtcgccgaactggcaaagcggcacgacctgttggtttgctccgacgagatccattgtgat
		gggcactgaatctggctacgtctgtccagccatactttggcctagcaactgtttgggtagctgccacgaaagcctgtgcctcaggacggtctagcccaggccttgctccctcggccaaatccataacggtgaaagtcatgtcagcgattcc
		tgatggcaatccgacaccttcaatcctccaggtcaagggcgccaaggatgtcgcgatcgagttcacctcactatcgaagacctattcgatggcgggctggcggatcggcttcgcggttggcaaccagcagttgatcgcggcaatgacgcgggtgaaatcctatctcgactacggcgccttcacgccggtccaggccgcggcctgcgccgcgctcaacggcccgcaggacatcgtcgagaagaaccgccag
		ggctcgagccccgccgcgtacgcgaagcgctcattcaggaactgcgaggccagcacggtatacgccttgtcgaaggcgtcgctcgtggtcagatagttgtcctcgcccgtattgatgacgatgccggcgtaggcgttgatcatgcggctgaatcgctggtccacgaaggtgcggtacatgttgatgtcgcggaacaggatgccgtacatagagtcgttgagcatcatgtcgaggcg
		ggagcggtccacttttgaaggatcttttccggaaaacgcgccgccgccgtgccttcccattccgccgtatgtatcaacaataatttttctgcctgtaagtcctgtatcgccttccggcccgcccacaacaaatttgcctgtggggttaatgtgaaactttgtattttttgtaatcatgttcttgggaattatggggtcaatgacgtgctttttaatgtcagcgc
		gcgtacaccgtctgtatcagatgcatgagcggggcgagctggccttcccggccatcaacgtcaatgactcggtgaccaagtccaagtttgacaacctctacggctgccgcgaatcactggttgatggcatcaagcgtgccactgatgtaatgattgccggtaaagttgccctgatctgcggctacggcgatgtgggtaaaggttcggcccaggccatgcgtgccctgtctgcccaggtctggg
		cgggttggccctcgatgcgcgcgcgcgccacgtcgacgagatcggcgacgacgctcaccgccgtgggcatgtcgcccgcgccgcgcccgacgagcaggcatggaccgagcgcgcgccccatcacgaacatgccgttcaagacgccgtcgacgttggcaagcacgcngtttttgcgcacgagcgccgggtgtacgcggagctcgaccttttcgccgcgatcgtagccgatgccgaggtgcttcagcg
		cagatggaattttagatgagatgttaagacaggatcctaattctagagtcgctgttgaatcacttgcaactactggttcagtgcatgttgctggagaagttacaactaaagcttatgttgacattcagactgtagtcagagatacattaaaaaaaaataggatatac
		aatcaggaaggcgttgaacgggctgatcgccgcgcccatgttgcgcagcggcacgacgcgggcgcggccaatgtaggcggcggcgccgagcgcttcggtgtacaccacgccgtgatacgacacgtccggctcgttgaggcgcttgaacttggtcttgtgctcggcccagggaaatttgccgctatctacaatgatgccgccgatc
		cccgcgatgggaaggaatataagaaagccctcgcgacggcccagaaactcggctatgccgaagcggaccccacggcggatgtgtccggcgcggatgcgctgaacaagctggtcatcctcgcccggctggcattcggggccgatcttgcggtggata
		tcgtgcagcagcaaaccgcgcgcttcgcgctgcaggaaacccgtaatccgccatgcgatcgagcatcgcgaacaacggcgcgtagtaagccctcgacgtcgagcacaccgacgcgcttgtgatggaagcgtagatacgaccaggtgaagacctcggtcagctcttcgagcgtgccgatgccaccgggcagcgcgatgaacgcatcgctgagct
		aagccgcgcaagccgccggcaggcgtcatctatatcagcatcgattttagcatagctgaatcgaatgaactgcctcccttcaggccctgaaaagaaggcttcgcccggcacaccggccaacccgatcgtctcgaggagcgacatcgcacgctcttttcccgttgtgccaggcagacgcgacgcatc
		ggggaaacgcttgaggaatattggtggtgcacaaagaaggcgctcatttgggatgacggcaaaggtccagatctgatcgttgatgatggcggggatgcgaccatgatggtccatttgggttatgctgctgagaagaatccggccgtgttgaattataaagcgggcggagaagatgagcgtttacttttggcatgtctcaagcagacgttaaaagaggatgcgaaaacatggcatcgcattacgcccaag
		catccatttttatgcatcctatggagttaactcctgaggtgtatgaagcatgcgccaaaactggcgaatgccgggattccgctgggaagccagactgttttgctaaaagggatcaacgattcggtgccggtaatgaccgagctgatgcaaggacttttgcgcaacc
		actctggctcttcacgaccgaagtgaccgtacgctgctgttttttgataaataggacgcagcaaatccagcatttgcacaatacccttaggacgcaaatcaaaatgctcgctgactaaggcagaaattttttcatcgctgattttgcctgtgccaaacgttgtcaccatcactgaagttggcttagcaataccgatagcataagagatctgtatctggcagcgtgatgcaagaccgg
		tggtgtcaggatcagatttgcaccgaaggcgcggagaatcatacggcgttcgacagacatggtttcgggcatggtg
		catcgtcgaccacaagctgcgggcctttgccgtccggatgcgagagcgcgcgggaggtgcaccaccagtaatcttccagtgattcgcctttccacgcgaaaaccg
		tgccccggtaggtctcgtcgatgatctcgggcatcgagaggctctcggcccgggccggtagccccaggcgtcgcgcgcctgcttgtgcaagtactcggcgaagccctcggcgaggcggtcggccagcgccttcaccatgatcgagcggtagtcgtcgtgatcggcgtcgaaggcggcgaccagcgcgtcctggccgatgcccgcggtgaccacgaagccgccgacgtgatcgtgcccgcccaccggcgcg
		ctcgtgtacgggcgcaacgccagcgtcggctcgtggctcgacgggcagggcatcgacgtcatctacgcgctgcccggcaatgatcatggccaccgcgttcgtgtcgttgccgctgatggtccgcgaggtggcgccgatcctcgccgagatcggcacggagcaggagcaggccgcggccacgttgggggcgaccac
		aaaccaaacagcatcaaccttgatggcctcatcccgaacttgccgattgtggcgttcaccaatgttggtccggttgcacttgatgatcttgacgaacttcgcccagtactgacccgtgccggaattagcgtgtacgcaattgataaattccctcgactggttgactatgtgactcctaaaaaaggtacgtatcgcagatgcttcgcgcgtgcgccttggagcctatctttcaccgggaaccacgatc
		cgtgctgatgaacgcgcacaccactccgcagcaggtgaccacgcgtggcattacgcgattgaccccggagcgcgtaatggaaattgcacgcgacggcaaaaccgtgcgtctggtcagccgaggtcggcgaaccagcggcggcgtctcactgcgcgtgcgcgccgaggtgttgggtcgcaacgatattctggcgtgcactccgggaaccagcaatctgatcctgtt
		tcccgcagagaccggcggcaaccaggttcttggccacataccgtcccatgtaggcagcggaacggtcgaccttggaggggtccttgccggaaaatgccccgccgccatgggcgccgtggccgccgtagctgtcgacgataatcttgcggccggtaagtccgcagtctcccatgggggccgccgacc
		gtccatgccttccttgccggcgccggacaccgactggtaggtcgccaccaccacgcgcttgatgcggaactc
		ttccttgccatctaatttcgcgcttttatcaatggcatccagcgcgcgctgcacgtcacccagcggaacgcggtgcgtaataagtttttccagcggaatgcgcttgtcggcaatcagcggcagggcgcgcacaaaatgctcggcttcattgtcaaagctgccgattattgtgatccctttcatcagcaggtccgtgcagggattaaaggcgatggttccggaatccacgaagttgccgacttc
		caatgaagcgaccatcgcttgtaccgccagtggtggagagctctgtatcgattttggtttcagctttaatagctttgcgtaaagcaccagcaagggcgccatcaccggtaatgaatgggctcccgcctaagactcaatcaatttcaaagtcgaggcctgctgcagtaagaatgccttctagacgactgcgcaactcttctggcttgctctcggtagagaagcgaaagttgaaatcaattgccaa
		atacgggacgagcagattcgccgcctgggcgaactggcgcgcatgatgaccgattcgggacagattgtgatcacggccgtcaccggcgtcgacgagagcgaactgggcgtgctggagcaactcaatcatcccaacgaggttctcttcgtgcaggtgggcgaacaggcatcgggcgggagtcgcatggggcttcccattccggccggaggggatctggacgcgagtgtcagcgcggtgtgcgagacg
		gacgtattccccgacacacctgaaataatggcttctttcgcaaagcgcttggccgaagttggagccaatataatcggcggatgctgcggaacctcacccgatcacatacgcgcccttgcaaaagtatttcaaagctgaacatagcaaagaagaa
		aggggcttttctggaaaagatcccagcaaagttgatcgctcagctgcttatgctgctcgttatattgctaaaaatattgtag
		ggtcttcggcgagagagtcttccatcatcgctgtaaaagcttgaagctcttctgcccttgggatgatctgctttctcaccgggtcttcagcatcatcaggatcgatcaacgaaatgtagtacggtgtaacatctactctgaatagtccactgctgtttagtgcacgtcgttcactctcagttagtggaaagatcttctcgatctcttccgcgctattgagtcgattacttaactgccaacg
		caccaacgagaccgaccttctcatgcccgcgcctatcgactatgcccaccgcctatgcaagcgtcaggccgaggtgcgcaagaacggcaccctgccctggctgcgtccggacgccaagtcccaggtcaccttccggtatgaggacggtcggccggtcgccatccgggccgtcgtgctctccacccagcatagcgatgaagtcagcgagtccaccctgcacgaggcggtgatggaggagatcgtcaagcccg
		attggagtcttctgcgtgatttccaccaccagtgtcagtgcttcatcaaacgaaccttgaatttgtatcacttccgcgccatatgcaatcgctccagccaattttcctgccgcgaccttgcctgaggggatcaacacaatagagcgcaaacctgcccgcgctgcatacgcagcagcagatgctgctgtgttcccagtggaagcacaaatcacagtccgtgcgttt
		caaccaggcggtgcgacaggtaaatcggcagcggcatcagcgacggggtttcgtcgcaggcgtagccgaacatcaaaccctgatcgccggcgccctggtcgaggccgtcgtcgtaggctttgttgacgccctgggcggatgtccgggctctgcttgtcgtaagcgacgagcacagcgcagcccttgtagtcgataccgtaatcgctgttgtcgtagccgatgcgcttgagcgtatcgcgggcaacctgg
		aattagatttgtggaaaaataaatttgaagttggagtttatcgtttaccaaaatctttggatgaagaagttgcaagattgcacttagaacaaataggcgttaggcttacaacattatcaaaagaacaagctgattatatcggagttccaatcggaggcccatataaaccagaacactacagatactagaataaaatgtatagtgcaaaaaaaagct
		tgatgccattacacttcccctggttgctctcggtgctgaagggtgtgatttcggtggtggccaatgcctgtcccggacaaatgagccagatgattaccgcgatacaatcaggcaatctgatattggcgcaaaatcttcataatcagatgcttgaacttactcagcttattttcgccgaaggcagtcccggaggaatcaaagcagcgctggtacacatggggctttgtgaaaatcagctacg
		gccatcacacccgggcgcgactttggcaccgaccagactggccgctttgtgcgcttttccaccgccaactcgatggccgaactgcaaaccgccatcgcccgcctcaaagcctggttgcagccatgaacagcagcaacgtgagccccagcgtttttgaacacccca
		gcacttaccatggctgcccgatggcattgcccgtgcaatatgctagcattgccgcttggcaagatgaggcgcatgttgtggaaaataggcagcagtatcgggaaaagtttgctgcgtttattgcgattttggcaacggtgtgtcacatcgaaaaaccacctgcgagtttttatgtgtggctgaaaatcccctcagtcccttttgataaaggcggagcgaggggaatttcagacactgaatttgcgc
		tgctgtcgatcaccaggcaacctgagttggtcgcttcttcaacccaggcagcggtagcttctttgcctgcgacaaaaaaatgccagctgcgcctgcgtccagtcgaattcagcggcatcctgcacggtgattgtcttaccaccaaagcgcagttgttcgcctgcgctttcgttacgtgccagtgcataaatttccccaaccgggaactgacgttcagccagcgtttcaagcagggcttcgcccacagcg
		tggaacatcacgccccagcgccgccgcagggcctggccctgcgccgcattgagcgtggcgaggtcgttgccgaacacgcgcacctggcccgaactggggcgctgcagcccgatcatctcgcgcagcagcaccgacttgcccgagccgctgccaccggccagccccaggatctcgccgcgccgcacgctcaggtccagcccgtcgtgcacggtgtggctcccgaagcgggtgcagat
		accaggggcacgcccttcttgttggcgtgctgctcgcgcagcttggcatagtcagcggcggtttcggcaacgaagtcatcacgcatgccaatcgacagcagcttggtgaccacgccaaccgcacgcgaagcgtccggcacatagaccaccgggccttcgtagttgggggcgatcttgatcgcggtatgggcgcggctggtggtggcgccaccgatcaacaagggcacgtcgaatttcaggcgctt
		cattgcgcgcaccaacccgaatagccaccgtggtcagcattgtctgtgaccgtggcgatcgttatctctcctctggcgtctttgttgattaactacggtcgttgaaagcaacctcatggttcctatactggtctttgacattgaaaccattcctgatgttgcgggactgcgcaacctcaatgacttaccggcagagcttactgatgacgaagtg
		agcgtgatgccggcgatcgacgcggccgcgtggggcgacgtcttcgtcacggccaccggcaacttccacatcttccgcgaagagcatttc
		tccgccgggtcaatgaggttgaagaaatatggcgtgatggcgagcgcgagcttggttttggcgagttgcgcgccggcgagttcctcgggcgtgagcgtgggcatcaggcgctggagctgttccagcgaggtgatgcggtgcttgagctgccaatgccagtcgttccagtcggcgtcgggcacgtcgctccagaagccgcgcccggcggatttgaattgtttcaggggaatcaaggtggcggagccgcg
		ccggcggcacggcgctggtggaggaatcgatcctggaggcgctcgatttccgccgcgccatgcgcaaagtcgacaaggagtggggcaaggattggtggttccaggtatgggggccggagagaatcgccgccgagggcataggctcgcgcgaggactgggtgctcaaggccaatgaaaaatggcacggtttcggcgacctggcttcgggattcaacatgctcgacccgatcaaagccacggtcatcacgccggg
		cctctctgccgccctttacgccgaatcccaagactgcacctgtgcctttcggtaaatattttttcgcatttt
		gagcgctgcgctgatcgccttcatttcaggttcggtggccgtgtaccccgttggattgttcgggaagtttaaaatgaggatcttcttcttgccaggggccagcagcatcttttccatggcggccgtgttaaaggcgcccttcttgaacatggggaaggtcttcagcttgccgccgtaggcctcctcgaacatcagttcatagttgtcccaataagatcgggaaggatgagggtctcgcctgcctccaggaaga
		ttctggccggcaaaacgtcttcttgtacaatgcctgcaatacatcgaacacatatcggtaatcagaagcagaaccctgtccggatatctgtgagtcaggccctgaacaggcgaatcctcgtcctcatgcaaaggatctaaaaagatccgctgttgagatgtgtgtctcggaacctgtaggaatggcctgctttctaaccgggtcatttggattgtcctggtcaattagtgttagataataaggagtgattg
		gcttggttccggcatctgcggcgcgatcctcacgcgcgacctcttcggcctgaggacgcaaatcgtcggagtgcagagcaccggcgcgccggcgtatgcacgctcgctggaggtcggagtctgtcgagttgaacgctgccgatacccatgccgacggcatggcggtccgcataccggatcaaagggcttcgacatcatccgcaccggtgtggctcggatcgtgacggt
		gagtagaagagaagtgtatttcacttggatctattcttctgtctaatttatcataaatgacagaagtctttctctctatattctctagaagtattttagatatttcttttgctgttcctgatggagagtcggctttgttattgtgatgtaattctgtaccccatatatcatactcatcgtatttgtttataagttctgctgccttctctattacttggtaatacata
		gagcttatcaaagaagttcgattttttaccagacacacaggtccttccttatctcccttcaattcctggattctctccaaaagtctggaaac
		cctacaccaactggggacgctcgcgctcgggctgctattttttgcttcttccaaaaggatgtggaatgggttcggcttctggagacacatccggagctctatgatcttgctcaagcctacgaagaccggagcaacgacattaaagggggccacttccaatggaacgactcgatgccactccgagaaatgcggaaaccggagaacatc
		atgctggtgttttcagtaacattcaatagttcaaacaatttttcttttttctagtatgatctggacacgcaggataaccaggtgcggggcgaataccttggtagctttctttaatgagttggtctggtgtgtggtcttcggcttctgcgtatccccaatagtccgttcttaccatgagatgcaggtattcagcaaaggcttcggcaagtctatccgctagggctttgagcatgatagagctgtaatcat
		ggcgccggcggcaagcactgcctctacatggccttcatggccatcatcaaccccagcgatgaggtgatcatccccgccccctactgggtcagctatcccgaacaggtgaaactggccggcggcgtctgcaagtacgttgtcggcgcggaagccaacggcttcaa
		ggtgggcgtggcagccattccgctgtcggcgttttatggcaacgggttcgaccagcacgtggtgcgcttctgctttgccaaacaagacg
		tgggccgcccggctcgggctcggggcgctctacgtgaaggacgagtcgccgaacccgaccgcctcgttcaaggcccgcgggctgtgcctcgcggtcacgatggcgcaggcattcggcgcgcgcatcgtcgcgctgccgtccgccggcaacgcggggggc
	Osmotic Stress	caataaacggacgtctccacattttcatcattggattcaacgacacaggctgcgttgacgaatgctgcacgtacacctcgaggtgatcttgcaggttttctccaacaccgggaaggtgatgcacaggcgtgattcccactttgctcagttcgtcgctgtttccaatacccgaaacttgcagcagttgtggcgagttaaacgctccaccacacaagatcacttcttttgcttgaaccg
		ggtcggatcaacgaaagatgaacggcacccggatcgcttcatcgtagaaattcgcagacttgttggcgatcagcccgtgagcgcccgacagttcgccatggtcggaactgaacacgatgatggtgttttcggccacgtcgggcggcagcgaatccaccaccgtgccgatgtcccggtccgccttggtcatggccagcgtgtaggcatccatgccgcgctgccagtagctgtacggcgcaaggccc
	Proline & 4-Hydroxyproline	cttccctttcaactctaccggcagcgtgttccatctaaaccaattaactaaggcgtatcttaccccagactctactgggtgtacttcgtgattgtaaatatagtttgatgggaatactagaacatctcctggctctggctttatctttaaaccaaaatgcttgtactctaaatctccgccggtatactcttcatttagataagctgtaatagacaccgttc
		gatggcgcggctacaattgattaaagaacacgccttcgcacaaccgcgtagctctacgcctttggcgcggtattgttccgcaaggacaggcaagacttttgccgcgataccttcgccaactagcaaggtttccatggcattacacacgccataacggtgggttttagcgttcatggcaatagcaatcgcttta
		tgttcagcgcgagcaattttccattggcattctcggtggccggaggcgattcggcctcggcgctggcggcaggctgccccattgtcgtcaaggcgcatccggcgcatcccgcgacgtcggaattgacagcagccgcgatcgatcgtgcggtaaagaagacgggcatgccgggcggagttttctttctgctgcagagctcgcgcaacgagatcgcgatc
		ctcggaatggcgaagccagcgggagatccgccgtcgcctcgtcgccaagaattgccagatagggccgggatcaagacggaaggcaactgcctgcttctccatgacgaaaaattggtcttcagggtatggacaatgaattcaaggcgcaggagaagatcgtccggcggacgccgtcaaggtagcgatggccggtattgtactcctcgactgccaggcggc
		tcgcggtaagctcttcaattatttttttatagctagaaattttttgagaaatctctccttgagtttgatttctaagtaaccaagataatgatctttccagtaatttgttaatactaacgaacattttaacttgcgatgtgaaattaattttaccatctaatttttcaatttcattaaataaatttttaataccaaatgattc
		tgcctgagaatccactgaaaccggatatgccggagaatccagatgcaccagatattcctgagaatcctgatatgccactaaatcctgaagcaccactgaaaccggatatgccagagaaaccggagatgcctgagaatcctgagaaaccggatgttcctgttgcaccgtttgttccactaaatcctgaaatgccac
		gccgaactcacccccgtccggcaaattgcgtggaggcattgtgcagcacaattgcactatcgacacggcttaagaaaatttctgccgttggcgcatcttccgtgacgatggaatcggtatggtgcgatccatggcgcgcgatatgcgccatcgcctcttccacaccatccaccagcttcaccgataaaa
		cctggacttcatatttgtgttgatgcccatgagatgtgtgaccaatgcgacatccttttattggcggtcaaacctcaagtcttaccttcagaactcattgagttaagaaatcatctcaaaaataaagccatcatttctattgcggcagggatctctacagagagtcttatcgcgctggttgaccctagtactcaagtgattcgagtcatgcccaatcttgcggttgaagtccttcaaggtgtg
		ccacgtcaaagggcgcgatctgctgcggccagatgataccattggcgtcatttgactgctcgaccgtcgcggcgacgatgcgtgagaccccgatgccgtaacagcccatcaccatcaggttctcggcgcccttctcgtcaaggtaggtcgccttcatggccttggaatacttcaagcccagctggaacgtatgcccgatctctatgccgcgcgagaagctgagcttcttgccgcag
		catagaatatctgtagccttctgtaattggataaacttcgtgcacatataaaaaatttgatgggaaaatatgatgcttccagcctctggctttagttttacaccagaatttacaaactctatttgtccaccagaatagtcatcattaagatacattacgctggacaatacacgactactaacaccttgatcttgatgtgctggtagatgtccgccaaacacccatacttttagcagatgtatg
		cagtcgtgaggtgcgccgaatcgccggcgctgccagccaggaaattgaggccttgcttggttatatggatgagccagaactgattcaccgtgacaatatgatccttctgccctgattctttttcttgcatgcctacaattttccaaaggaagttttcatgacagctattccactgactcctcatcaggaagccgccgtcctcgcccaagcattgccctacatcaagcgttttcatgg
		cggcaaggaagtgatctggatgtccgagcgcgacggctgggcgcacctgtatctctatgacggtgtcaccggccagatgaagaaccagatcaccaagggcaactggcccgtgcacagcgtcgagcgcgtggacgatgctgcccgtcagatctggttcaccgcgagcggaatggatgcaggcaaggacccgtatttcatgcactacttccgcatcaacttcgacggcaccggcct
		gatggaaacgctcctggtcaacaaaactattgcaccgcaagtgttgccagctctttgtaagatttaccaagataagggtgttgagttgcgcgttgatgagcaaacccgaaacactcttgaagctgcgggattcaagaatctagtcaatgcagtagaggaagattggcaaaacagaatattttagcaccaattttgtcaattaagactgtcgcagatatggatgaggcaatgggacatatc
		gaagaaattctgcgagtgaatgcacttgatgttgctcgcgcaaaaaccaatggccaagatgctgcatttattgaccgactcactatgactccgaaaacaattg
		aatttactttgttcttccatcgctttcggatccatcgtgtcgtattttgcaccgatcatcagcgtaggaacatagagttcttttaagcgatttttaatatcccatttttccaaaagtccgctaatcccaaattcgctcggcccttgcatacggacatatatgtcactatttccatgtttaaacgtgcgattcaaggcatcaggccactcttgtaagcggcaaatatgtt
		cagcgcggaccaagcctggccccaggccagcacgacctccgcctcatccaccccgtgttcgccggccagctggcgcagcatcagcggaccgcaacggttgaccgattcattggccagcacagtcgccaggatggcgttggccagcgggtgcgccaacgcaggacgggtcgccaccagcagatcagggaagtacggcttgagcaccgactcggcccagctgttcccggtcagcggcaacgccgacag

## Sheet: Carbohydrates
Subsystem Hierarchy 1	Subsystem Hierarchy 2	Sequences
Carbohydrates	Amino Sugars	gaagcaccataaaacatttgtaacatatttctaacattactaatattccaattaccgattggctgattaaacagtgaagcatccataaacatgtaagacatgtctgtaacattatcagtattccaaccagagatattaccattaaaactaatagcaccatagaacatattatccatatccgtaac
		gctgcaacaactgcttactaagcccactgattttttggccagacccttggatttttcactaactttgaggaatcctggaacgccctcccttttggaggggcctacttcaacagcatttacatagtgatcatctcggttattggaacgctacttactagctcaatggctgcctatggccttacccgctttgacatcaaggccggcaaagtcttgc
		agcgtgcccttccacggcggcgacaagcgcgccgacgtgcgcggcggctggtacgacgcggccggcgacatctccaagtacctc
		atggttaagctagctgtgccatcggcatcaaaatcgttgccgattaaaccgctggaggtggcggggattattaaggtttcgcccatcgtgacggcattcaagacatacacatcagcattggcgacaggcgcggagttggtcaccgcgacggtgatttgcgcggtactggtgttgccgtttttatcggtgatggtgtaagtgaaaatatcattgccagcaaacgtgccgtctgagatgtatttaatcgtg
		gatgcgttcacggtgatgacgatgtcgtcgctggtggagagggcgctgtcagtggccgtgagccgcagggtgtaactgcccgccaccgagaaagtggcggtggtcgcgcgggcgctcgcgttggcgaaggtcacggttcccggaccgctgaccttcgaccaggtggtggtcaaggtcgcgggcgggctaggcaacccatcgtcggtcgcggtgccggacaggctcgcggtggccggcaaggtgatggtctgat
		tggccgaacaccccgtttggcaatctcggctgaccgtattttcgatggatatcgatggcatgatgattcggtcatcctgatcgagggtggggtggttcagcgcatcgcgccggttgatcagagcgcgcgcgactggccgagcgaagtcatgccgcccgggacaggatgtttcattgcttcttattttgaatagcgtcttccttatatcattaatattacaaactttcagcgaatcgttttggtgataaag
		aaaatttcttctgcttgtctgttgtattggtaagggtaattttctgtacctcacaggtctcatttaacggtacaaagtaaagacattcagctgcaacgccattacgaacgcctttaattacggtataacccataccatgacggcactggtattctgtaagaccgcgttttaccggtttccagccccggagaccagaaatcatcaccatcttttata
		cgatgggtttctccaccaacacgtgcttgcccttctcgatgacctttccggccacggcgcggtgctggtccgtcggcaccacgatgctcaaggcttcggcggcgtcggccagtttgtcgatggtctggaagaccgccgtatggtatcgctccgcgatctcctgcgcgcgcttcttatccgcgtcgtagacgcccacgagctccacgtcgggcatttccgagtagatgcgcgcatgccactgccccaag
		cttcctcttttaatcaagatatcggttcttggaataccagcaaagttactgatatgcaaggtatgtttttcggcgcttcttctttcaatcagaatcttagttcatggaatactgataaagttgttagtatgaatgcaatctttgctaatgccttaaatttcaatggcagcatcggttcatggaataccagttctgttacagttatgagcaatatgtttccggtgcctcttctt
		gcttgcccatcagatgcacgggcatgatggcgcgcgtgcgcggcgtgatcttcgcctcgatcttgtcgggatcgatattgagcgtatgacggtccacatccacaaataccggagtcaaccctgcctggaaaaccgcgtttcccgtcgcaacgaacgacagtgccggcacaatgacctcatcaccccggcgtgccccgaaatcatatagtgctgcacaggagagcgc
		cttcctcttttaatcaagatatcggttcttggaataccagcaaagttactgatatgcaaggtatgtttttcggcgcttcttctttcaatcagaatcttagttcatggaatactgataaagttgttagtatgaatgcaatctttgctaatgcctt
		gcttctcggaccagcgactgacgattggtcatgaacttaatcagctcccatgcgccatctttgttctgagaattctttgccattgcatagcccaacccaccagcaacgctgttgttgttctttgctcgcattggcatttgaactagtccgattttgccttctttgccaagtgaggattcttcaagaatcttggctttccaggaaccgacaaaaatgattcctgcttttctagaaatgaaaag
	CO2 fixation	tcgtgatcgggctgacacgctttggagcgagcgcgccgtacgagaagatttatgaggggctcggcatcaccgcgcagcgagtgatcgacgcagcgaggcagctttt
		caggagaacggtcttgctcccattgttgagccagagatcctcactgacggcaaccacaccatcgaagtttgcgcgtaagtcactgagagagttcttgccgcatgtatgaaatctcttcttgagcacaacgtcttccttgagggctgcttccttaagccaaacatggtcacccaaggtgctgaatgccctaccaaggcctcatccaaggagatcgcctggtacaccgtga
		taagtttaaagacaagcaatataaattagtacaattccattttcatacccccagcgaagaaaaattaatggcaaaaattacccgctaggcgctcacttggttcacaaagatgaatctggaaatttaggtgtaatcgccatcttaatcaaagaaggcatggaaaatagcgtattaaaaaatgtgtttgcaaaccttccggcattt
		gccacggaaccctgacgcagctctcagtattcgaggccgtcgcccgccatggcagcttcacccgtgccggcgaagaactgcaccttgcccagcc
		gacaacgccaagatcctcatggcgcagcccgaaatcgacggcgtgctggtaggcggcgcagcgctcgacccggtgtcgttcgcttccatcgtaaacttctagcctctcgggacaggcctcggggcaaccggcgcctgtcctcctcatccgcctccatgccggccgacatctacgattggatctcgcagttgaaatcc
		cctgtacggcatcgtttcagtagaagattatcgccgcgccctgaccggcgagtgcggctcattcgaacaactcactgtaagcgctgttgcaacgcgtgagctgattacagcctttccagatgaaacggtgggggtggcgctgcggcgcatgtcgccgcgcgacctgtcacgcttgccggtggtggcgcgtgatga
		atcgtaacttcctgagatgattcacttattgtccgtcgataaacataccgattatacataaactgtatgtcccgataatgttcttctcaactcgactgtctccatcgcccagatttttattgtattatcgtcacttcctgagatgattcacttgttgtccgtcgataaac
		attaccgcacctatttggagcaattcttccggtgtataatctggaaaatctacatggtttgcaaccctagatgataaacccgggtttgattcataaaacttatccattctatctttataaccagcaaaaattatcaccaaatcttctcgctgattttccataacttgcagtaagatttctatggcttcagaaccataatctctttcgttatcaggttta
		cctacaaatctggcatttgataatttggcgactgctttgggaacggacttaaatggtgttttggctcacccagaattggctgacattttattgtatcacgttgtaggtgccgaagttttatcgactgatcttactaatggtccggtagctacgttgaatggtcagaacattaccgtaaatttaatgagtggtgtaatgatcaattcatccaatgtaactttagcagatgttcaggctgataatggagttgtac
		caacaagtgaatcatttcaggaagtggcgataatacaataaaaatctgggcgatggagacaggcgagttgagaaaaacattatcgggacatactgcttctgtataatcggtatgtttatcgacggacaacaagtgaatcatctcaggaagtggcgataatactataaaaaatctgggcgatggagacaggcgagttgagaaaaacattatcgggacatacttcttc
		gtccgcccgacaagaacacgatccccggcaccgccgccggcacagtccgcttgaagcactcgatcgtcatccccgcgacctgcttcacgctcgcttgcaccttcgccaacttccccgacaccaccatgttcggcttcaacaacatcctctcgagcaccacgccgtgctcctccaacgcatcgaacacttccagcaacgtgcgcgtcgtgacatccatgcaccgctcgatcgtgttgtcggc
		gaatttgattgcatctttatcagtttcaggaatagttgaccactcttgatcaaaaatatgtccttatctttgtagtgtaaatatttttgcagcaacaacatcttcttctggagatcctgccatttttcctactccagcagtcccagtatgaattccgcttgcacctgctaatctagcaaattttgataatacaagtactgtgaaaccaattggattctcaggtcgagtaaaagctccgtgtgcagct
		tcttacataagaagtatgtcccgataatgttcttctcaactcgcctgtctccatcgcccagatttttattgtctcatcgccacttcctgagatgattcacttgttgtccgtcgataaacataccgatcttacataagaagtatgtcccgataatgttcttctcaactcgcctgtctccatcgcccagatttttattgtcttatc
		gagcagactttcgagcaccgcaatttttgatgaaacctttgcaccgccgataacggcaataaacggcttctg
		aatttgattgcatctttatcagtttcaggaatagttgaccactcttgatcaaaaatatgtcccttatctttgtagtgtaaaatattttttgtcagcaacaacatcttcttctggagatcctgccatttttcctactccagcagtcccagtatgaattccgcttgcacctgctaatctagcaaattttgataatacaagtactgtgaaaccaattggattctcaggtcgagtaaaagctccgtgtgcagct
		cattttaattgaattgtcttctgacctggaaatgattcggactccgtcagatgtcgcaatgacagattcaaccgaatgactgtgacctgagaaagtatgcaattcttgtcccctctccaaatcccacaccttaattgttgaatcactcgatcctgatatcacacaacgaccgtcaagagttactgctactgatcgaacccaacctgtatgaccagtaagggtatgaagcaattcaccagt
		gcgcggctcctgcagcatcggcggcaatatcgccaccaatgccggcggcatccgggtggtgcgctacggcaatacccgcgagtgggtggccggtgtgaagctggtgaccggcagcggcgagctgatgacgctggggcgcgggctggtcaaggattccagcggctacgacctgc
		tattgatagctttatatgatgagattatgactgagaatgacgtgttcatcttatccaaaggacacgcttgtgcgccgctatacgtattgttaagagaaaaagggcttaacccgtcaataaaacatcatcccgtgtatgaccccgaaaacggaattaatatgactggaggatcgttagggcatgggcttggatttgctataggcgttgctctggcgaagaagataaaaaggagataagggaagagtg
		agagccgcgtttcttcattcccgatgatgtattggagttttatcgcaaagccgtggataaaggacgtgaacttgagttcgactggaaaatgcgcttcgatgcatacaagcgtattcatcctgcgttgggcacagatttacagcgccgtctaaatggcgaactccctgagacac
		gtccggagtcgacctcccagagccgcacggtgttgtcaacgctgccgctggccagccgccgtccgtccgggctgaacgccacgctccagacccagttctcgtgcccctggaagcgtcgcagctcctgtccggagtcgacctcccagagccgcacggttttgtcatcgctgccgctagccagccgccgtccgtccgggctgaacgcc
		aacgcggcaatttctcggccgcgtgcggctttggcatggagcagggcaagcagggcatcttcggtacgttctcggcgttcctggagatggtcgtctccgaagccacgatggcccgcctgaaccactccaacgtcatcgcccacttcagccacgccggcgtcgatgacatggccgacaacacctgccattacggcatcaacaatttcttcgcccacaacggcctgccggatgaaggcaaggacagca
		cacatacctgccatccgggctaaaagcaaccgcatagacggggccatcgtgggtcattttggctacctcagtaaaagttgcaacctcccagacacgagcggtctcatcatcgctccctgagactatatattttccatccggactgaaagcaatggattgcactggaccgtcatgattcatacgggcaatttcttttccactcatggcttcccataagcgaacggttttgtcatcgctg
		ccttgctcgatcgcctgatggcgggagcggcgacgttgtcatgcgaagtcgcggtttgcgcgccttacccctatctcgcccaggtccagtcgacgctggcgggaacgcccattcggtggggtgccccagtcggtcagcgagcatgcttccggggcattttacgggcgaggtctcggcatcgatgctccgcgatttcggttgccactatgtgctggtcgggcactccgagcggcagctggcggatg
	Central Carbon Metabolism	ggcttttaaatagacttcgtcgcccggattgtaggcgcattccgccagccacatccccctcgggccgcggccgaagcggagcctgtaatcgt
		gcgcccgcgccgcgagctcgcacacgggcgcgctcgccggcaacgacaggatctacgaggacgtgctgaagcagtccggcgtcattcgcgcgcggagcctgcgcgatctcctggaattcgcgcgcggcatcccggtgctgccgacgccggcgggcgagaacgtcgtcatcattaccggcgccggcggctccggcgtgctgctgtccgatgcctgcgtcga
		tcttcgacggcgtgggcctcgactacgtctcgtgctctccgtaccgcgtgccggtggcgcggctctcggcggc
		caatggatcaggtgactgcagaaagtccgaattaattggcgggaccatgtgcccgagttatatggctacccggaacgagcaacacaccacccgggcacgcgccaacttactgaatgattacctgcaccgcaagaaaagtaaagaggtcttcgaaagcaaagaaatagatgacatcctcgatctttgcatctcctgcaagggttgcaagtcggaatgtccgtcgggagtggatatgaccaagatcaaag
		tgaattattggcatcattgcgtgagtcattgggcggcgatagcgttgatgcgattttaaacgccgaccaagccaatgaagcgggcatacatgaacagcgtgagcgtatagcagaactcaaacaagcattaagcaagctggacacgccagaagcgaaaaacttgatacagttggcagacagcctatgcaaaaaaagcgtgtggattatcggcggcgacggttggg
		ggaaaattacgtttgttgtatgaatgtaatccgttagcttttattcgctgaacaagctggtggattggctacaactggacacgaaagaattttagatatcaaaccaactgaattacaccaacgcgttccttacatcgtaggttctaaacaaatggttgaacaacttttggattgtattcaaagagctgataaagc
		ccgttcaggatcccggtcatgtccgcggcccgcgcgtgcaacaccccttcgagcccgcagccgtattgcggcgtctggatctcgcgcgcatacgacgggctcaccgtcgtcagcagcgtcgcgtgctgcagcccagccttcagcaggttcagcgatccccagtgatccatcgccttggtggagccgttcaccagccccgtgaacgccacgtcatccatcgggtagacgccctggaacccgatgttg
		gactgcaccgctgcatctgagatcatccaaaacgcgcgcaagtcgggccgcacgatcctgaccgagtacgaatcgaagcagctgctctcgctctacggc
		ggggtattcgctgccatcacgccagcagccgtcatcgccggcacatcgaaattgttataccccaccgaaatgttagccacaatctttaggcctttagcctgcgcaagggctttggcatcgatgcgttcgctacccgttaccaatgcagcagaaacgccagccaactgggaggcaagggcttccggggtcatcaccacatcggcctgattggaaa
		agccgtaaaggcgctcgccgagcgcggcaccgaagccgccatcgttgtggcgagcgggttctcagaaaccggcgaggagggcgcacgccgccagcagcagctacggcaggcggctggcaagatgcgcatactcggacccaacaccatcggcctcgtcaatgttaccgagagcatgacgctgtcggtatcgagcgtgctcgaaatggaccgctttccggttggcggaatcggcgtcgcctcgcaatcggg
		gagccccgtctgccagtcgtggcaatgaatgatctcgggacgcctgccggatttgtacaagaactccatggccgcgcgagagaagaacgcgaaacggagaatgtcgtcgttgttcccgtagaagcagccgcgattgaagaagttgtcccgcgaatgcggctcgatgaaaaagcagctacgaccatgcacggaaccactgaacaccgtgcaatgaatgtgccc
		gtggctccgcgggaacctattcggttacccaaccagagctatcggagcaattacgcaagaacaaacttgcacacctcaatgccgcttgtgaagaatcgggggctgaggtgattgtttctggaaacattggttgcattacccatctccaacagaaagatactccggtcttac
		tgctctggatggccgcaaagtaagcgttgtgccgcgcggtccacaagcgcgtgcgctcttcgggcgtcaccgccc
		gaggtagatcaggcacgcaaccggatacaattgtcgatgaaagaaatctaaacaagaataccgcatagggtcacttctacaagctcagtaacccctatgcggcactcttttaatattgttacttttttttaggtctgcttctttaacaatctccataccacgtaccaaggcagcttcattttccggaagcaaatggtggtgacgcgatgggagacttttctttaaaccagcaataacat
		tgcattgtttcaggacattcccacgttgcaccatatccaacagtttctccccgttgacaggttttaacactaatcaattttgatttcaaaatcatcacgggtttcaaatcaaaattgctcgcaggttgctctacaaaaggtgaagaaccatacaacataataccaggtcgtccccaatctgcatgagtttgtttccaacctaacaacgcagcagaatttgaaagtgatttttcatttttccaatattgtgttg
		gacaagtttaaagagatgcatggagtcaatttgggcttcatgagtttctttgctaaagcttgttccattgctttgagtgaatggcctaccgtcaatgcctacatagatggagatcaattggtctttcatgactatgctgatatcagcatcgcggtgagtacaccgcgaggactcactgttcctgttattcgcaatgtagaaagcatgacgatggctgacattgaaaagaaag
		tatgttacagaacaaatcgcgatagatcagaaaatagatagaattggacggtactgctaataaatctaatcttggtgcaaatgcaattctcggagtttctttggcagtggccaatgcagcagctcaggaatccggtcaatatctatatcgctatattggtggcgttagtgctaataccttaccaattccaatgatgaatatactgaatggcggttcccatgctgataattctattg
		gctcgatggtgaattccacaatcctgcatgtcgtagtaatgcttttcgagtttggcggtgatgtccataaattgcttgtaggctttgggcatctggtcattgaggtggacaatcggatcggcattgcggatgccagccaccacgtcttcgccctgtgcgttgatgaggtactcacccatcatcatggcatcgccagtggacgggttacgagtgaacgccacaccagtcgcg
		gccaaacaagataactcagcgcgatttgaaatgacgccactgtaacgatcacccaatgccgttgccatgctgcctgtaagtgttgcaaagtccatcatcatgtcaggtttcaagcgagatgctagcgttaaagtatctgctaagaccatacgcccttctgcatcggta
		gcagcattatgccgggcaaagtcaatccggtgattcctgaagcgactgcgatggtggcggcgcaggtgattggcaacgacacgaccattacgattgccggacagtcaggcagtttccaattgaatgtgatgctgcctttgattgcctataatattttgcaaagcattgaattattaggaaatatcagcgttacattggcggataaagccattgcggattttagtgt
		attggaactgctgaaacaatacatgcttgcaacaggggtgaaaatatcatgattatttttatcaataacgggatctatggtatgacaggcggacagatggcacccacaactcttcccggcatgaaatcttcgacatcaccatatgggagagatgtgaaaactatgggaaatccgc
		aacgaaaagaatgttcatcagcgcgatgttcttgacatattggctgaacggtgtaaccaaaggaggatagccgagcttgggccatacgtatgcgacttcgtcaaaaagctgtacaacaaggtcattgaaatctacttcacgtttccctttggaacgcaatgccatgttgatggcaccatgcatgcctttcagatcggacatcatggaacccatcatgccaccgggaaggccacaacccaccaagagggagg
		agcctcttccgcctttatcagcctgtcccaattgttatctctatccatcgcaaaataacgaccggtcatggtggaaataaaccaattcccgtctcc
		gcgaagaagagggttttgattgattctttgtcgaatacggtgataattcacttgaaaaggtttgcgtttgacttcactacgatgcagcggttcaagataaacgactattgtgagtttccgctggagctgaacctgaagccttggtgcaaagacaaccctgaccgagcagttgactactacgagtacaagttgatggga
		cgttctgaacctacttaaaaaaatgaacgtggaggtggtttgcacaactgatgatccaattgattcgcttgtacatcataagaaaatcggctcgtttaagtt
		ttgcgtgtctcagagatacaccttggcgccgttaccgatacgatcatcgaagttacgtgtcgaggtggagaacatgttaacgccgtcaggaacgcgcgcctggttacccatgcagagcgagcaaccggcgatttcgatgcgggcgccaaaggcgctgtacaccgagaaatacgcttcgtctttcagctgctgctgatccatgcgggtcggcgggcagatccaggtacgaacggcggcattaaacggctggccg
		gtatcttgctcattgtggccaagcttacggaagcaaatgatgtcaatagcaacatccttatgaaacttcatgcggaattcgagagctaactttgtagctaaaactaccgcttcaggatcatcaccgttcacgtgcaatacaggggcatcaacaatcttcatgatgtccgtgcaatacaagctagaacgcaagtcacgtggatcagaagttgtgaaaccaatttggttgttaatcac
		tggacgaggacgccacgcagaccgccgccctggacgactcctgcagtggcggctttggcgacaaggcgcttgtaggcagcgcgggcttcggtttcattggcgattcccagggccacgccgcccagttcggtcttgtgcaggattttttcggctgaaagtttgatggccaccgggtagcctatcctggttgcggcagc
		ccgctgcgaaatccggaagtgtcgagcaagttgccgattacggttctgtcggtggcgggattgctgggtgaagccgtcctgcgcatccatgacaatcagtccgtgtcgtcattgttcaaagtttagtaacggtgaaaaggaagaggtaagtatggcgaaggaaatcaaactgtcagcaagcaagcgtgagacctccggcacctccgcggcgcggtcac
		agagcatttaacaaagctgcagaagaaataattgcagttccgtgttggtcgtcgtgcatgattggaatgtctaattcttcttttaaccttctttcga
		cggacactgccagagtggcgaactcgttgcccgcgaggacttcgtccagcaatccgataatgtgatgcgcaccggcctcggcggtggcattcgcatcgagtaatttgtgccagcgtacgctcatgttttccccgatgccgcaagccgtgccgcgagcgccagggcgcgctcaaacacaacgtc
		cgacgagaaggtgagcacggaagccgacatgacggcactcgaaggccgcgtgcaggcggaagtcgatgcggcgatgaagttcggccgcgacagcgaatatcccgcgccgaatgaagcgctcgaaaaagtctacgcgtaggggcacacgtcatggcaggtcctgttactgatcaaggccgctctctcaccatggcgcgcgcgggccgcgaagccgtcatggcggagatgcgcaagaacccgaa
		cgtccaccacaatcgcgccacgctcgtccaattgcagacccacggcttcggcgttcaggccaatggtgttgggcac
		tctgcaattgtggcggcataatccgtagcgccgaatacggcgctgccggcgacaaacacatctgcgccagcgtgtgatatttcggcaatattggccggctttactccaccgtcaacctcaagctctgcctcagaaccacggcgatcaagcatggcgcgcagggagtggattttcgggagacacgcgtcaataaaactctgaccgccaaagcccgggttgaccgtca
		tcgaaacgccagggtagaccttccttctccatgatgacgagcgcgtcgcggaggcgttcatcgtcggggcggaagccgaggaggccgcccacaatcgctttgtcggtgccatggccttcgccggtgcgggcgaaggagccgtggagttcgatcagcgcctgggtggggtgccggcgacgaggtcgcgggcc
		gggcggacgacacggacagccacctcgtcgccctcgactgcctcgtgaagctcaaggatttcgcctcaattggactcacgtcaacccttaattcgatgccgcgcaacgcggcccaggaaagccgtcccgtcgaaaacattggccgcatcctcgagccagggagcgcggccatcataggcgtgtctgagaaaggcatgaataacgggcggatcatcctgcgcaatctgctcgagaacggtttcgat
		atccgaaatggcctgcccaccgggctgcgcgaacacctgcttttgtcgcttaccgtgcttgagcgtcagcacgcgccagccgcaggtccggaaaatgtcgtcgaaccggccaaacatccggtctgccgtcgcataatccagcgactggcggttataatcgacgatccaccagcaattgcgaatatcatgcttataggcctcgatcaggcattcatagatattgccctcatccagttcgg
		catgaagaatgtagccggatatgacgtttcacgcttactgcctggatctatgggaaccttgtcactgttactcgaggcttctgtaaaagtccttccaaagccagcagcgacagccactttgcgttgccaaatctcgcaagaaaaagccttacgagttttaaatgaatgggccggacaaccgctgccgctatcagccagctgctggattggtaagccaagacaagatggcgagctgacaattcgcttgg
		gcacctgcggacagacagccaacctggcagtggctgtccgctcctcggctgtcggtgaagatggcgaacaagcctccttcgccggacagcacgagagttatctcaacgttcagggctcggaaaatgtagccggtgcggttgaagactgcattgagagcctctataccgttcgagcacaggcttaccgcgcttcacacaaccttcaggatcggatcgct
		gtctcccacctcgctttctcggttcaaagcccctcatagggaacgccattcggttgacgaaccgggtctgcccgtacagcattgaattgcaatggcacgtaaatctcaaaaaacagtcggtataatcggccttggtatcattggctcccgggttgcctccgtcctccgctccaaaggctggcatgtatgcgtttggaataggactccgcagcctgaacccagttttc
		gatgtacggcgacgtggtgatgggtctcaagccggtcagcaaggaggaccacgaccccttcgaggtgatcatcgacatggtcaaggcccagcgcggtgtgcagctcgacaccgaactggacaccgccgacctgaaggagctggtgacccgcttcaagggcctgatccgcgcgcgcatcggccgcgactttcccaccgatccgtgggagcagctgt
		aggatagtccgtacattctttggactttgccaatgtattgatgaacaaccgctgaaatagatacatggctggatagccaataatggcagacgcaaagaacacccatagtccgacaagtccaatctgcaccggcaaaaacacgatgcccgcgccaatcgccatgcctatgctcatgattacccagccgatancgtttcgatcaaacccgtaagcttttgngtcgttaacgactgattt
		cggcataggaggccggatcttgcgcttctgcctccgcaggcgtttttccttcaaattggccgtaatgacgttcgcgcaacccgacatcactcacgacagtcattcccagagcgtgcgctatctcatctgccgtttgccgggcacgcatcagatcactgctgacaacggctgaaaagggcgtttgctggtggcaattgtgcaaatatcggcccgcggcctctgcctgtgccaatccccg
		ttggttgcatatagatgttatggatggagtcttcgtaccaaacattactattggaatgccggttattaagcacatcaaaaagtattcacaaaagcctcttgatgtacatctgatgattattaatcctgaaaggtttgtcagacaatttgccgaagcaggtgctgacattataaccatccattatgaagcaagcgttcatctgcataggactattaatgaaataaaagacctgggcaaaaaggcaggtg
		agcgtcttgatggtgctggggagggccatggcaaaggccttggcatcgaacggacggaagaggcgcaccttgatcacgccaaccttctcgccttccttcatgagttcctcgacggtctcatggacggtttcagcgcctgaaccaatgatcacgatcacgtgctcggcatcagcagcgccgacgtaatcgaacagcttgtactggcgacccgtgagcttggcgaacttgtccatctgctt
		ggatggctgctgtaattctcgatgcagatgatcttcttaaggcatctacaatcaccataatttccattaagttatcgtt
		cggtgatgtcgccggtgtagcagatggcggcctcgcagatcttgccgctcttcctgaccgcctccatggccacccgcatgccggtggtccagttgagcgagtcgaagattcggaagatatcgatgccggaatttgcggcctcctccacgaagcgttcgaccacgttgtcggggtagttggtgtagccgacggcattggagccgcgcagcagcatctggaacaggatgttgggcacctgctcgg
		cgagattgacgccgaatgccgagcgggcaccaccaaaatattggctgggccggtcaatcggcagaacggatattgcgccatcacatcggggttcagggcaacatcaactgtcatttcaccatcatattcgaaatcgactttcatcgcgtccaaaatagcaggggcgcggtgcattttggtggcgcgttcagaaaccggatagccaaaggtcgaaaagctgacaaaggcaac
		gaagctcatcgcggtcttgatgtcctccatgtccttggcggtgagcgccggcgccgtcagg
		aaagcacttcgaccatggtgaatccgcgtttttcgatttgataggtaaaggctttgcgaatggcgtttttggcattccggacttgccggggattgaagaccg
		cattgatagaggttgattaccttaaattctgaaggatattcatcagattgattcccgctaaagtcagcgttttgaaaaaatcaaaaccttcaaaaaacttctgccagccataatctatgctttcaggattgcttttataaataagataaagttcttctatttgttgtaaatcgatattactcaaataagaatttgcgtccataactgtaaatttgcttaatctttttgttaaag
		ctatgacatcgtcgacaaggaaatccccatccccccacgggaatccagaattccgaattcaaaaatcacaaatccgaccccgcaaccctcgaagcagtcctcgccgaatccgcggccttcctcaagcgtgccaaaaagcccgtcatcctcgtcggcgtcgagctccatcgtcacaacctcatcgagccggtcctcaaattcgccgaa
		tcagcgcatcgagcatttcgacgacatcgacacgggtgccgaggctggaatagacggtggccatttccaggccgatgatgccgccgccgatgaccagcatcttcttcgggatgaaacgcagttccagcgcgcctgtggaatcgacgatgcgcgggtctttcgggatgaaaggcagatgtacggcggctgatccaacggcgatgatgcaattcttgaaatggatgattttcttgcc
		gaagtagtattcattgtcgatgaaatagatcggcacaccatcgaactccattttcagaagtccgctgtacatgctccgccagcccagtttgatcatcgcccagcggacaaaagtcagttgggacatgtagcggtccttgatcttcttgtagagcggcatgatgatgcgcgcatcaatgccaatctcacgcaaactgcgcggcagcgcacctgcaacatcg
		caggcctggtgggccgcggcgtgggtcagctggcaaggcccggccacgtcacccacggcgtagatgttggggtacagcgtctgcagccaggcgttggtctcgatggtcttgcgcggcgtcagtgcaatgcccaggtcctccaggccatagccgctcacgcgcggactgcgacccacggcgcacagcaactcgtcgaaggcgatggcgatctcgcgcccggcctgctggacgatgagccg
		gccagcatgtccatactgacccgccccacggtgcaactgggcataccgtccaccagtaccggtgtgccactggggcacacgcggggatagccgtcggcataaccgcaggccaccaccccgatacgcatggcctgccgcgcgcaaaatcccgaaccatagcccaccgtcgcaccaggttgcagatcctgcaccgccagcacccgggcggcaagggtcatggtgggcagcaaaccccattggctggcactgtgcg
		tattctttgctttgagttcagtgaccttgccgtctttgtcagtgacattgagcgtgtctttggctttgaattttgcctcgcccatgaacacagcgatgttgtttttcttcatcaaaaagccaacgcctttggtcaatctgtctgaattctggcgcgaacgtttgaccgccacaccataatccagttttagattttcaaaggtgaaaccaaaatccttgccgcgttcgcg
		tactgataacatactggtcgccgaacgtttcaagcgcattatttaatgccgtgaaatgtatttctctagattctattaatactccatctaaatcaaatataacaagtttattttgcatctctatgaattttattatgtttaactatcgaatatgcattgcatacaattttacatctgtctc
		cggcagcactgtcagatgacccacttcgccagccaatccgcgcgaaccgagcagcagatggtcattgctgatcacgccgccgccgatgccggtgctgatggtcagatacaagacatggtgatggccttgcccggcgccgaagcgccactcgcccagggcggccaggttggcatcgttaccgatccgagcgggcacgccaaaccgttttccaactccgggccaatcgggaagttttcccagcctggga
		gcggatggtcgccttttcggggtgaggccgcgaccgcggtgagcagcgacgaagtcgtcgtttatcatcttgcgcatcacgtcgaactggatctcctccaccttctgaacctcatgggaggtgcggaagccgtcaaagaagtgcaggaaggggatacgggattcc
		gggtaaactggtaagggccggtcacatcaccacagacataaacactggggatattggtttgcaaaacgggttagcctgaatgcggccttgctggtcaagctgtatgccaagattttccaggccgaacccgcgcgtattggcaacacgacccaaagccaccagcacttcatcaaaaataa
		tgcccctgacgtgctgatgtccgctattgacccaaagcggacatcgtctcgcgtgttttcatggcgcactttcgtcgcgcacgctcatcgcggagcgagatccccgtaccagtaggcggcggtcacaccgccatccataagaaagtcgctgccagtgatgaacccaccgtccgggcccatgagcagcgcggggacagttcccacctcgtccggagtaccgacgc
		tatcctttttcgtggcatgcccattcccgaggtgttgaaaaacttcctaaagcccgcggcggcaagatgccgttggtgggtggtttctattatttgcttatgatcggtgagtttccgacgaaggagcaggctcaggaggtggagaccgaatgggcaaagcgttctgatgtgccggactat
		ccacgagctgcgaggcctccgtcgtcatcggcaggatcacttcgaagatcggcggcgtgtgcatgccgtgctcggcggccgtgtgcgcggcggtgatgatggtcatgtaactgcgcgcgagacggaaaccgtgttccttccagatgttcgggacacggaaggtcaaaaacttatcgcggcccaattggtgctttcggaaaaaaggttcgtacttgttgaagaggcggtcgacgacggcttc
		tagcgcttttcgatcatgttaataaaataattccaccttacacctgcaaggtttgcttagcgatggaggcgtacattcccacaacgaacatct
		catcctggtcgcccaggtgccgggcggcatgctcaccaacatggaaagccagctcaaggagcaaggcgcccaggacaaattcgaccaggtgctggcggaaatcccgcgagtgcgtgaagacctcggcttcatcccgctggtcactccaacctcgcagatcgttggcacccaggcggtgatcaacatcctcaccggcgagcgctacaagtcgatcacc
		cacacgcgtggcatcacccgcgccgacgatcgccgggatgccgagctcgcggctgacgatggctgcgtgacacgtcatcccgccgctgtctgtcaccaccgcggcggcacgccgcatgaccgagacccagtcgggcgacgtcatcggggcgaccaagatctcgccgtccttcagctgtaagccgtcggcggctgacatcagcacacgcactcggccacaggcgatgccgggcg
		catataactattcacttccatgatctgtgttagatttaggcgaattcaattaaaagatctttggcatctacttgagcgccagatgtgatgtgaatttttttaatcacaccatcctcattggctgtaatcatggtttccattttcattgcttcaatggataccaagggatttcctttttgtatcacttgaccttctttcactgcaacagtcgcaatcatgcctggtagtggtgcagcg
		aggagctccaggaacacgtcaagcgcgtcaccgctccctacaaatatccgcgtattgttgaattcgtcgcgcagcttccgaaaacgatcagcggaaaaat
		gagcgcgtggtctcgcaattcctcatcggcaccatgcaggtggaaaacttcatgctgcacttccgcaagaagaagaacgcggcggtcatcgtcggcggcgaccgctccgacgtgcagctggtggcgctggaaggcgactgcccctgcctggtgctcaccggcaacctgtaccccaacgacgtcatcctgacgcgctccgaggtgctggagacgagcatcatcatcgtgcgcgagg
		aatcgcatccttctgtggcgccacggacagactgattggaatgttgccaatcgctttcaggggcactcagatattccattgaacgcactcggtgaataccaggcgcgtcacgctgcagaaattcttgcaggaatggaaccaactgcgattatctcaagtgatttaatgcgagcacataagactgctcaatcacttgctgaaatagtaaatctcaacgttgc
		catccagattggaaacataatggacatgcaggcctggatgggcaaacgccgacaaggcgcgcgttgccatcttcggaccgaggtctgaaccgccgatgccgatgctcactacgtgtcgaatcgtgtcgccgctgtaacctttccaggtgccgctac
		tcaaggacgccatcgccgacatcaccctccagcaggtgctcacgcgcccgaccgacttcgacgtcatcgccacgctcaacctgaacggcgactacctctccgacgccctcgcggcgcaggtcggcggcatcggcatcgctcccggcggcaaca
		gccgcaggccaatataatagcggtcgttgagcagatcctcgttgttggtgccgacatccagcatcacgggcaggcagtattccgggcggatgccggcgcaggccgaatagagcgacagcttgccgaccgggatgcccatgccatgcgcgccgaggtccccgaggccaaggatgcgctcgccatcggtgaccacgatgagcttggccggatgcggccagttggccagcaattccgcg
		gcaaccacccataccaaaggcttcatcagcgatcgctttcagcggcagcgccttgccaccgcggaactggccatcggtggtcaccagcaccttggcgccggcatcttcgatacggtcgcgcagcgactgggccgagaagccaccaaacaccaccgagtgggttgcgccgatacgggcacaagcttgcatcgtggcgataccatcaatggtcattggcatgtaaataatgacgcggtcgccctt
		ggaatgaaacaaattcttaaaccaaaaaataattctgatcctcataatggtttaggattggcattaccccaaatcggggtaaataaagccggttttatcatgaggaaaggtaatcattatcaaatagtaattaatcctaaaattttagaacatagggatcaatcagaa
		gctatgaaaactgccaaagactatatccacagctctgctgccatcgtctttgatctggatggcacgttgatgcataccgagcccgatattcgacgagccaccaatcaagcgttgctggattgcgggtttcaaacactggcacccgagcaagtgattccgaacttgtatggcccgctgcctgacatcttggcctctgtgatgcaggtcgtgcaggcccccgtcgtcg
		gatctccgccgccatgccgatgctttcgcccagcgtggggtgcgggtggatggtcttgccgatatccacttcgtcggcgcccatctcgatggccagcgccacctcgccgatcatgtcgcctgcgtgggtgccgacgatgccgccgcccaggatgcgatgcgtctgggcgtcgaacagcagcttggtaaagccttcgtcacgcgtgttggcgatggcgcggcccgacgcggtccagggg
		cgtcgcctttgttgtcttcgacaattaatttaaatttaatttcatctggttttgaatttatttcttctatggctatttccattccatgaagttcattttgtccaatgaaagcatattgtccactaagtgcaagagttgcaccaattttcacaatattttcttggggctgattagttatctgtcctgttattgtttcgtttgtgcaagcactaattgcgattatacataaaatca
		ggtacgtgtcttcaactcaaccgacggggccgtcagcggaatcaggttcacaggcttgtactcgatgtggttatcactaccgaaccacagggtgtgcttaagcc
		aggaatatgttgaagacgcttaaacacataggtatgcatcatcataaaggggatgagtgcagtatgatgatcatgtacatgaactgtatccggtagtttttcccattggttgagccaattaagtacagaaagttgaaaggcacaaaaacgctcggtgtcatcctcatagccgtaaacttgctccctatccagaaggccattgatatcaatcagataaagctcaaaaccctgggcgtccgacttttctttga
		ggtcaaaggcttcttggacagccagcaaatcgtcaacctggcacaacgaatcggcgccgatgccatccatccaggctatggatttctctcagagaattctcattttgcgcaactgtgccacacatccggcattaccttcattggcccatcgccacaagccatcgacttgatggggagcaaggtcaaagcccgagatctagccaaacgagtcggcatcccgatcgtccctggaaccgaaggcggcg
		gttcacgctcgacaccgagtcgggcttcaacgacgtcgtcttcatcacctcgagctatggcctgggcgaaacggtcgtgcagggcgcggtcaatcccgacgagttctacgtgcacaagcccatgttggccgcgggcaagtcggccatcatccgccgccagctgggctccaagctcatcaagatggaattcaccaaagcgggcgagccgggccgcgtcaagaccgtcgatgtgccgacggcgctgcgcga
		aatcggttttccacaggctgagatgaccgccgaaggtcgcgcgtcaattgaaacgattatatcggctaactcattcaatcgctttgaaattccgcgattttcttgagaaattcactttacatgccacattctgtcacgcatccatttgccacacgacatctttgcaaagaactcgaaggagagccacgatggctaaacagaaagtcgcaatgttgaccgcaggtggtctcgcgccctgcctttcttccgcc
		tgaaccaagaaggtttgcgccagttgcttcaataacttggatgtacttgtcgtaagttgcctggaacaagttacggcatgcatcatcaatgcaacgatcagcgattaggtgctctccacctgttagctctgatgtttcaccaaagaacactgttccaccagcttcgacccaacggtcaacagcttgtgaagttgttgggcaagagccaagaccagatgttgtatctgattctccgc
		agacatctcagtggctaccaatgcaggtcaaatcaagaccggttccctgagccgctcagacaggatggcaaaatacaaccagcttctacgcattgaagaggagttgggtgcatctgcaatctatggctacaaaaaagttgtgaaaggataatctgacaacagatagaaacaaanaacacgcgac
		cctcgagcgcgatcccgccaaaaaccggcgcgatgttttttgatatcgtcggcgagtcccatgtgggcttttgcaaaacagatcggaaaggcgtcaatatccgcgagttttttgaagaggagggctttaccctccatagcagggattgccgcattccccccgacattcccaagcgagagtacccgtgagccgtccgtgacgatggcaatggtgtttgccttgagcgtgtatttgtaggcaa
		tcggacaggcgacgatcccggtgattctgtttgtgctcggcatgaccatcccctggcgcaatctggtgccgcgcggcgaaattctttccgtggtcggcatcaagctgctgctgacgccgttcattgtctggttgattgcgccgctgatttatacgcgcatgggcgaagcgcagtatgccgcggtggtcgaaggcacgacaccggcgatgatgacggcattgctgctggcgg
		tgttgttgtcccagatgagcacgagcttgttcagcttcaaatgcccggccagcgagatggcttcctgggaaatgccttccatcaggcaaccgtcgcccgcgaggcaccaggtgcggtgatcgacgagatcatcgccgaattcggcagccagcttggcttcggcaacggcaaagccgacagcattgccaa
		ccttgagcgcttccttgtagagttcctcgacctcgatgatcttgtgcgggtcgatgtcgagggtgtagtcggtgccgcggagggcgtgccagagggagagtacgtcggcctggcaggtgcctccggagcagggcgcgagagagaggtcgacctgatcgaccccggcctcgatggctcccatgcaggactcgacgccgaggccggccgtgtcgtggccgtggaagacgatgcgcgccttggg
		aagttcattgggttagcttcttttgccaatgtctcagccatcttggcagtgttcttgtctttcttgtcggtgattgcagcaatccactccgcacttggcttaggaacagcagaaatccctttcaagagttcactaacgcatgaaccaatatcaccaattaatggggcagcgatttgcacgttgctatcgacctcgtttgcttgaatatcgatctgaataaatttcttaggatctttgccccaagtctt
		caccgcacgattctcagtgatatttatcgacttgccaccaaacatcttatcacgatatttaaccacttctgcagcttctgctaaagcaagcagcaacctcatcgtctcttgagtcacccgattttttgaataatctagaaaaatcccaacggcgttaacggcaaaccttgaaaagcgctgactatcaagcgcaaactgctcttttatccttaaatctgcaatctgctgggaatgctcctttaatag
		ggtcgcccatccctgccagtcccaccaccaccgtcgtgaagatgatcgggccgatcaacatcttcaccaggttcacaaacgcatccccgaggggacgaagctccacgccccaggccggcttgatatatccaatcagcccgcccaccacgatgccgatcaggacctgcacatacagggtgtttcgcgggcggggcgcgcccggttccggaaccggttcgggaggggggtgcatcgcgcgcgacg
		gatgcaaatattttgaatcaaattaaatcaaatttaggtcctttagcacctgatttgttgaccttaccgaatctgcgctcttctggaattctgctttctcttctgcgttgaggttgagctcaacaattctttcccatccgtgtctgcccacaacaacaggc
		aatgcaggcgcaattttccaagcggccatcaacaaaggaaagttccatggaataatttgtccggctacacc
		atcgaaagcgcaagcttcggggaaaaacggcatgggtctggacattggtccagattccgcaaaggcatttgcggctactgtcagctcttcagccacagtgttctggaatggcccaatgggcgtttcgaattcgccaattttgctcatggaaccaaggcggttgcgcaagcactgactgaggttgcgggtctggcggttgtgggtggcggagactcggctgcggcagttcgcgcactggggattcgacgaagc
		tcttcgtaggtcgggctcaggccgcagaagtgctcctggcccttggcctcgtcctcgatgcggtcgatcatccacttcagcacgcgcatgttctcgccgtagccgggccagacgaacttgccgctctcgtccttgcggaaccagttggtggtgaagatggccggcaggcggccaccctgtgcagccaccttctcgcccaggttgagccagtgcgcgaagtagtcacccatgtggtagccggtgaaggg
		gaattgctttggcatctggaaattttaactgaattgcactgatatcaattttgggcatatcaacaacaggacggccaacaactattggagcatttgctttttcttttcagcctccaattctgcttcaaaacgttttttgccatcccactcttataatcgcgatattggcgatcgtgcatggctaattcaaagagttcttcgtcatccttacc
		atccgcattcggtcgcgggcgcacccccggggtgggctcccccacgctcgatcggcggatcgctgggcgagccgcggggtttggttgtgcccattttgcgcaatgttgatcaattaacgcttgctgagattgagaagcaaattgcggattacggtaataaagcacgtgaaggtaaattaagca
		acgcgatccagcgcatattgaaatccttatcgcgtgctccgctcacgccagcaagacactcttcaacataacggcgcactgggtcagcccagtgacgcatattggacatattgattgcaaactctttagtggaatgggaaatggttaccgaatccttgatcaataaaaactc
		gtgctggaatccaggcattccggggatagcccattcacgagccaatgttgcctcatcgcgaagatatgctttgaattttgtcgcatcctttgcgattcttggcgtaatcggtggcatctctttgatggtttggatacgccaaggttctgagccatttccaagaaatccatcagtcaatagtacgaccggtaccatccgttcgagtgctattttggctgctatataggcataatgaaaacaat
		gtccttggcggacacggggacacgatggtcccactcccgcgctactccgcagttggcgggattccgctaccagagatgctaagcgccgaacgtattgaggcgatcgtcaagcggacgcggagcggtggtgcagagatcgtggagctcctcaaaacggggagtgccttctacgcacctgcggcagcaacctttgaagtggtggagagcatcctgctcgatcgtcgccgcctgatcccatgcgccgca
		ataataatattctcagcatcttttgccccatgatatacaaagggatgatattcgcgcccggtgcgcttgctgatcacctgcatatattcttccaccacatcaggtaccacggtgtagaatttgttcgcggcttccctggtctggaaatagatgtcaggattctgagcggtaccgcgcgtaaccggatgttccggattcagtgcgcggtcgcggaattcctgaagggctttgcggtcgagcaact
		ggatagagcgccaccaccggaccaaaggtctcctgggtggagagcggcgatcgccggccgacacgggaaagaatcgtgggctccacgaatgccgcgcccagatcgcggcggcggcagccaccggtaagtacatgagctccgctatgaaccgcttcatcaatttgaagcatcactttgtccgcctgggcgccatgaatcagactgcccatatccaggtcccaggatggcgaccatcccagcttcaattt
		agggcttgtcacctcgtgcaataactgacgatctatataaatcgtcgccgtgccgtcttgttcagaatagacgacatggtcatcccacaatttgtcgtaaagcgtgcgtgacatgtaatccctctaaagcttttatttacgtacagtaatgttaggaaccttgcgtgaagtttctccaacatacaactgacgtggacgaccaatcttgtactcagggtcagtgatcatttcttcccactgtgcaatccaacct
		cactttgcctgctaatctcaacgctcacgccaacatcgtgaagctgtacaagcagagagaacagtcgattttgagggaggctggacttgactggggcactggagaggcgctggcctgggcttcgctgctagtcgacgacaaaatccacgtccgaatcagtggagaagacgtggagagaggcaccttttcccatcgccacgcagtactgagagaccaaaccgtgaacagcaaaaagtacact
		gcagcgcgatctcggggttggccagcacgatgatgtcggcgttgaccgtcagctcgttgcccttccagcctgcatcagcggccttcttctgcacatcggcgtttttggtcttgtcgttgtagtactggatgcggccgtcgccgttcttgtcctcgaacttcagcaagccggttttttcccagcgcttcatccagtccggacgatcttcggccttgatactggcctccggcgcatacagatcaccaccgg
		atgccggcgattgcaattttaagattacgattcgttatctccttgctgaattgcatgagctcccctaagcgtcccgtcgcctccgatacaaaagaggacatttatgttcattatttcaagggtatccaccatctgtacaacatcctggttccccctggaggagcccagaaaagttcctccggtaagatg
		gttcaaagcgcgacggcattaaaaatatatctgctccagcctcaattaaatgcgcgagattttcatcatagcctaaagtgaccgatattttatgggggatataaatgggcaaaattctgtaaccgctgttcaaaagtggtgtttccgctgcctaatagtacaaattgcagcggc
		ccggcaggcatggatgaagtggttgccgccaatggccgccatgtcgccgtcaccggtgaagacgaccacgtgcaggtcaggattcgccatcttgactccggttgcaaacgcgattgcccgcccgtgggtggtatggagcgaatcggtgagga
		ggcttcaagtgcactagtagctttgcttccaataccttttaccatggcattgtaagccaattgaacacgctcccaacgtttgtctctgtccattgcataatacctgccacttacactcgctattttaccaaccgactttttcaaatgtgtttctagcgattcaacataacattgtccgctttttggatctgtatcacgaccatcggtgaacgcatgaataaatacactgcttaatccttctg
		tgccattaatgaacaaagcaagtgcgtttgttactgatgaaggaggaataacttgtcacgcagcaatagttgcaagagaaatgaacaagccctgtattattaagcactaaaattgctacccaagtaatcaaggatggggatagaattgaagtggatgctgataaaggggttgtgagaattattgcgtctcaaaatagttcctcaactt
		tcaggaacagtatttgtcaaggtaacttacagaatggctgcaatgccggccttcgcggtttcggcatcctcagtcgatttaacgccggaaacgccgactgcgccgatggtaaacccatttacctcgatattgacgccaccttccaacatgcccgaaatat
		accgcggccacaaagccttgcatctccagcaccttggtcgggcagaattccacacagatgtggcatcccttgcagtacttctcgattatctcgatcgtcggaagtttcttttccatctacattcaccccttgataaataatagcccacaggcaaaaaacatgtgaacctagcacggtttatgac
		gcgcatgggatcaggtccgcaacggtatcgcgtacaataaatttgacataaagatcgttgcgacgcatgcgggcatcacggtcgggcctgacggcgcaagccaccaggcgatcgaagatatctgtcttatgcgcgctatccccaatatgcagatcattgtgccttgcgacgggccgcagacgcgggatgcgatcgttgcagccgcgggtaacaaagggccgttttacgtgcgtctcggtcg
		cgtaacggaaaaagccggcgctgagcacttcctggggtgtgaccgtgcagcccatgatcaaagccgaaggctatgaactgatcatcggctcgtagcatcgatccccagtttggacccgtgctgctgttcggtaccggtgggcaacttgtggaagtcttcaaggaccgcgcgctggccttgcctccactcaacaccactctggcccgccgcatgatcgaacgcaccaagatttacaccgccctgaaa
		ccgctgatgaacaacggcggcctgttcgaaaccggcgccggcggttcggcacccaagcacgtgcaac
		ggcgatgctcgaggcggagtcgtatccgggaccgtcgctgatcattgcgtacagtcactgcattgcgcacgggtatgacatggcgttcggcgcgtcgcaacaaaactggccgtcgattcccggagtgtggccgctctaccggttcgatccgcgccgggtggcggcgggcgacccgccgc
		actggtcaagaactacgagcgggtagtgtccgaggccacccaaggccttcggcaagcccgaggtgttcatcgagaagtgcgtggtcaatcccaagcacatcgaggtgcagatcatcggcgacagccatggcggttgcgtgcacctgtacgagcgcgactgctcgatccagcgccgcaaccagaagctcatcgaaatcgccccctcgccccagttgagcgattcccagcgcgaatacatcgg
		agaccatggatgaaggcaggcgaaatcaccgacaaggtcattggtgccatagaaggcggccggtacaagtttattcgtctcaattttccgaacggcgatatggtt
		gatactcgggcggaggacgtcgccgacgagcattggctcaacgtgctcgatgtcaatttgaacggcagcttctggtgcgcgcgcgcgttcgggcggcatatgctggcggcggggagggggaacatcgtcaacgtcggctcgatgagcggattcatcgtcaaccgcccgcagccacaaagctattacaacgcgtcgaaagccggggtgcatcaactgaccagaagcctggcggccgaatgggccggacgcggc
		gaagtcatggcggagaagaagatcaagttcgcctacatggtcggaacgatgatcgaagttccccgtggcgccctgaccgctgacgaaattgcgc
		tatgcaagcgccaagtctcgctgattcgttagttgctttgtgggggcaatttcaatctttcctggagtcggaaactcgtgatattggagagcggccgctcttaaatccgctatttgttgttctttggtgctattgcttggtttgctcatcggttcgctcatcaatcagacttgtacaagcctctaattctattcctctcggatgaaagagtcccaagagccataaaatggggcatgcaatctcaaac
		tcgttaagcggggaacacggagatggaaggttgagaggggaattcattcctttcatgctgggcgagcataactataatctgcttaagaatctgaaggaatgctgggatccgggatatgtactgaatccgggaaagataatcaacacccctccgatgaacagcttcctgaggcatattccgggtgaaccaacacgtgaaatcgatacttattacgatttctcctcaagtcttggaataataagagctg
		ccgtagaggaaggcgccgagttcggcggcgccgaggggaaggccggggtggccggaattcgcttcctggatggcgtccatggagaggctgcggaccgagagggctatgctttccagggccttggtgtccatgttgtctccttcgtttccgtggatgatgagcggtattctagttcgcctcccgcccggatgtccattcgtccc
		tgtggctagcaatagtgtaagaaatactgtaaaattagtattgttaaagttaggtatactagaatacattgactactttgtcagcaatgaagatgtaaaaagaaataagccatttccagaaatgtattggaaatgcatgattgcgtgtaattcattgccaaagacaacagtaatatttgaa
		gaaagggatgttcgtgcgcacgcccacgatgcgatattcttccagcgcgcggcgcatccgtaatattgcctgggcgcgcgtttcgccccatacgatcagtttcgagatcaacgggtcatagtaagacgaaatctcgaagcccggataaacgcctgtatccacacgcacaccggggccggtgggcagcaggctgtgtgtgattttgccggtcgatggcataaagttgttgaacgggtcttcggcattg
		atacgagtacttcaccgttgacgttggatacggtatgtgggagcggaccggttgcccctgtgctgaccgggagattgatgcgctcaaaaccgcggatgcaatcctgttcggagcaatcaccacgcctcccatgaaggattaccagagcgtggtgctgcgcatccgaaaggcactcgatctctatgcgaacctgcgcccggtcaagggtgacgggttcgacatcatgatcgtccgggagaat
		ttgccgttgacgatgagggtgtcttcggtgaagtccaccgtgccatcaaaacggccgtgcacgctgtcgtatttgagcatgtaagccaggtagtcggcaggcttggggtcgttgatgccgacgatctggatgtcgtcgtagccgtgcttgagcgcggcgcgcaaagccagacggccaatgcggccaaatccgttgataccccaacttgatggtcatggtgagagcctcaggagataagttactaaaccgttac
		cagcgcgctccaacgcattgatcaccccaccgtgtgacacgacgagcacgtcgccgtcgggatgccgagcggcgatcagacccagcgcctgggttgcccgagcgatgatctcgtcgtcgggctcgtagcccggcggacgacggtgttcggccagccagttggggtaactcgcctcgatctcggtccgcatcaagccctcccactgccctgccgaacgctcgatcaggtcctcgtacggatcgaggagagcg
		gtgcaacagcaaagcccaaaacactgcctcaacttcccgaagggtgggccgctagtttacttattattccgcagcagccggtcagggagttctggtttccgttggctatgccaacagttcagaaaggctctttactggaagatcgaatgcttgaccaactgctggcgtcaccaagtgaccctggtgggtattcacaccaagagccagtgccgcatcgtgatcgcaagcaacttgccaacctcgattggcgattg
		gatcgacatggacagcgccagctccggagacgcagcacttgcccatgccgcgggcaacgacggcagcgtgggaggtcatgccgccgcgggcagtcaaaatgcccttggcaacgctcatgccgcgcaagtcttccggcgaggtttcctgacgaacaagaacgacagcttcgccgcgcttggcccattcttccgcttca
		ttcagcatggtgaagtacaggctgtccgcgtccgggatgtcgcgcaactggccgcgcgtggcatcgccttcaccggccttttccaccttgatcacatcggcgccgaaccatgccagcagctgggtacaggtgggacccgactgcacgtgcgtgaagtccaggatgcgtacgccgtctagtgccttgcccatcaacaatctcctgttcaatatataaaaaattgattatctatttggcgataaata
		atgcccgacggcctggccgtgaaacccggcgatgtggtcaccagcatgagcggtcaaaccattgaaattctcaacaccgatgccgaaggtcgcctggtcctgtgtgatgcgctgacctatgccgaacgcttcaaacctcgggctgtgatcgacatcgccaccttgaccggtgcttgcgtcattgctttgggcgccgtcagatcaggcctgttttcaagcgatgacgagctggcccagc
		cacagaaagaatgcatccttggaaagcgaagtgtgctgttacaaccgaagccaggacgatggcggatgcactgatgggtaaagatgtttttatcggtttatcagctaaagatgctctaccaccagaacttttaagatccatggctcctgaccccatcgtttttgcattggcaaatccaagtccagaaatattaccagaaactgcaaaacagataagatccgatgtgcttattgcaacaggaagatcag
		gaagcctccgcctctgccgatgttgttctaatcgcaacaggttctgaagtgggagtagcgcttgcgacgcaggcaattcttgaacaaagcggagtttcaactcgcgttgttagcgcaccatgcctggaatggtttaaagagactgattcggcataccaaggcca
		tgtatgccctaacatatctggattagcaaagttgataacaatgaactttagtttttctccttaatagccttgatcctttttactacctcatccgtaattatctttgaactcatttcaggaacagttgcatagttttcaacctttggagaaggaatattaaaaaaattcctcaccaggcatgagcagcctcaaacaccacc
		cagccatgcaacttccatccggcttccgactggcattacaatgtcgaatacacagttgaaaaagaaagaggctatgcatctgtagaagatctctacactccgggcgtttttgaggtgaagctgaaaaaggcgaatcactggttttctcagccgccacttttgcgggcaatcctcctgctttcaaacacgcttcagcagagaagtcagcaagcggatcaaca
		ggtccgcggagcgctcgggatctcggaccgcgggcacaccgccgccagccaaatcaaacctggcgattttgactggaacacgattttcgg
		tccttcttgatcttgaccgcgccggtcttgtcgtgctcgaacatgtcgtccgcgtttccgtggtcggccgagaggaccatgatcccgcccgcggcgtctatcgccttcctgagccggccgagctgcaggtccatgccttccatcgagcagatgacggcctggtagatgccggtgtggccgaccatgtcgcc
		ctctgcctcattcgccatggcgaaacttacttggaatgccgaaaggcgcttgcaagggcacaccgatattccgcttaatgcgacaggcatgttgcaggctcgccaaatggcgcaagcacttaaagacatcaaactcacatttgatgttctgtacaccagcgacctcaagagagcggctgacaccgcaaatgctgtagttgaattatttggtgtagatgcacaagtggatag
		gttcaaagcgcgacggcattaaaatatatctgctccagcctcaattaaatgcgcgagattttcatcatagcctaaagtgaccgatattttatgggggatataaatgggcaaaattctgtaaccgctgttcaaaagtggtgtttccgctgcctaatagtacaaattgcagcggc
		aatcacgtcggcgcacatcaacgaaattgcgggcgagtcgccgcgctcgaatgaaaaaagccaaaaagccgcgttacgtttattacttcggaagcgggcacgcggacggatcaggcgggatgaaatcgctgctgggcggcaaaggcgcgaatctccacgaaatgacgcgcatcggtctgccggtgccaccgggattcacca
		gatcgccgaaaatgctcagggcatgggtggccagtgcgcgggcggtgacgtgaaggcagaacggaatcagctcgcccgcaatcttgtacatgttcggaatcatcagcagcaacccttgggaagccgtgaatgaggcgctcagcgagcccgccagcaacgccccgtgcagggctccagcggcaccgccttccgactgcatttccaccacgctggggactgctccccacaggtttttgcggccaccgg
		agccgagcgcattgccaagatggccaaggatgtcagcgaaatccttccgagctatcaggcagatctgcatttgatggccacgaccaaacgtgctggcggcatcccggagcgcgtgacctatcacccgccgtgtaccttgcaacatgggcagaaaattcgtggcccggttgaaggcctgctgggtacgctcggcgttagcgt
		ggcttccagtgcacggataatcggatccgaggcatgtaccgctgagaagttatggtccacggatgtcggcaaaccacccccgccccagaaccagagcccatttaccggcagcagaccattgcgctgccgttgaacattcatcggatggttatgcaaggtaatctggcattcattgagcaatgcagtccagatgcggtcggacggcaactgaccggcgagatcacatccaagcagat
		cgttctgtccaacgcttctttgatcaccacgctgcccaactgcgtggccgataggcggcataatttcccctgaaaactaccgatcggcgtgcggcaagcgctaacgatgacggcgcgctgcatggagacctccgcttttggcgcaaggcgccaaggacatcgtcgggatgctatagaaattttctaactgggatcggcaagatatc
		ccagtggggcaaacgcagatgagaccgaacggtactgcccggtaacctgccggacttcatacgtggaatggtctccctggtaatacccggtgaggtccccgagattgacaacacagtcagcgatcctgctcatgcgggaatccgaagatgcagtgataaggcagacacttcccccaagttccctgaccgtctcgcagatggaagctactgagtgcgtttcaccggatcccga
		cacctcgggctcatgccgcagggccagcccgagcgcgacaagcgcgtgctcgcgatggtgcagacgatggacgaggccggtttcggcaactgcaccaaccaatacgagtgcagcgccgtctgcccgaagctcatctcgcacgacttcatcgcccgcctgaaccgcgactatgtcgcggcgctcttcaagtcccgcttcaagccggtctcgaatgcggcggccggcggcggcg
		gcgcatgggatcaggtccgcaacggtatcgcgtacaataaatttgacataaagatcgttgcgacgcatgcgggcatcacggtcgggcctgacggcgcaagccaccaggcgatcgaagatatctgtcttatgcgcgctatccccaatatgcagatcattgtgccttgcgacgggccgcagacgcgggatgcgatcgttgcagccgcgggttaacaaaggggccgtttttacgtgcgtctcggtcg
		ctttttcaagacgctctgcagtttgcaatgcgagagcaatttcagaaccagtcgcaataattaccgcatcaatctttccagatgggtcgcgcaatacataaccgccacgagcaatctctttaatttgcgcagaagtacgagatacaaatgggcaattttgacgactaaagatcaaagcgctaggaccatttttgcgctcaatggctgagccccaagcgacggcgctctcggtggtgtcgcaa
		gatttgcggaacggttggtaatatagctacgcatttgaagtatgttgatgaggtagtaggccgcgaacctggcactaatgtttatggtgcaatgtctggattgattttgccgggacgccaagtatttttgttggacactcatgtaaacattgatccaaccgcagagcaattggctgaatt
		gtccttcattgaccttgtcgttgaccgggcagatgttcacgcaggcgccgcagccggtgcagtcttcaggcgcgacctggagggtagccttgaggccggcgagttccttgcccttggcgtcgacgctcttgaaggtggcgggagctccctcggcgtacttgggctcgtaggccttgagcctgatgacggcgtgggggcagaccatggagcagttgccgcactggatgcagatctcgggattccagacgggaa
		cncgcatggtcatgccacgccaccagacgctcatgaagagcagcgggaagtaactggccgccgcgatggcgaaggcctggccgaccatgaagttgatctcgagggcttcgacctgcgagccgaggccgacggcgacgatgccgacgatcaaggccgaccacttnaaggccttcaggcgct
		cacttgggctcctgctcgatcagattgagccagatgcggatgttggtcagatgggccgggttggcaatcggctgccagtcctcgtcgacgccgcgcacccccgcatactggaagccgaaccgcaccgcctcccagagaaaggcctcgaccaggcgcgagttgccgcgcttgaacacctcgttgccaattacctggatgcactgcagcgaggtgtgcgggtancggcggacattgg
		gcgtcgtcaccttgaccaactcaagggcggcggactggcacgtgctgccaatgggcgcggatcttcagcttgctgctatcggacgtggtcaatgactcggtcgaggcgattgcctcaggtcccaccgcgcccgacccgaagacgaatgccgatgccctgtccattatcgagaagtatgattttgaaag
		cctttatcctgcaccgtgatggaggctgcacgatggctcagtgcggtgagtggcgaaagcgcagcagacatggactcatgagtccgaacgaggccaaggttgaggctcatcagctggccaagctcttcccggatctgccaggcacggaccgttccctcctgtgccaacagacgctggacacgatgctgctcgattntaagctgatctgttgtgaatg
		ggctttgatagtctctagaatagaatacatagtagcctttagccagtaatcctttagaaactaattcagaaagaatattcgggccttgccctgctttgcctccaataagaatctcgtgtcgcatctatttgcctctttttattagattttata
		gtgccggaaggaagttattcaactaatccacatgatccgatgagtcgtattcgtgagttcaaacaaatggtacaatcacttcaccaatcaggcattcgcgttgttatggatgtggtttacaatcacacgtatattggcccaaaatcgcacatggacttactggctccaggttatttttatcgcatgaatgcagatagcacctggtcgaatgcatcaggctgtagcaatg
		ccctgaagcggttgacatggttgcccgcctggccctaaagtaccggcaggcgttcaacagagatgtggtcatcgagatcatctgctaccgcaaacatggccataatgaaggggatgaacccggtttcacccagccgctcatgtacgaacagataaagaaccgccagccgctccatatgctctatgccgcaac
		ttggaatccatgatttacatgatggatttccagaactctcgttggctgatcgatggagatatccccactcaagccggaaactatcacccaaccagtattccaactggggtttataaagccaaagatggttatatgaacattgccgtatttggatcaaagatttgggagcgcttctgcgatattctcggtgcacctgaatgggttaccgatgagcgctataaagataagcaaggtagatcga
	Clustering-Based Subsystems	gcgcgccgagatgtcgatggcgcgcgcgatggccaccatctgctgcacggcgaccgaacaggaggcgagctcgcgccgcacgtcgacgtcgacgtccagcccggctaacaaggtgcgtgcgccctggttcagcgtgcgccagtcgatgccgccgccacgtgtccagcgccgcatcggctggcggcc
	Di- & Oligosaccharides	ctggcggcattcatccaggagcgcaccggcgtcatcgtcgaccccgcggcaatcttcgacgtgcaggtcaaacgcatccacgaatacaagcgccagcacctgaacatcctgcacgtcatcggcctgtatcaccgcctgaagacggatcccaagttcaccatgcagccgcgcgtgttcgtctttggcggcaaggcggcgcccgggtatttcctggcgaagctcatcatccgcctcat
		gcagtcccgcgagtcccaggtcgccgcggtgccgtcccgcttcgtcggcaacggacgtcaggtgcgtggcgacgagcgttcctccggacacaacgtatcgctctagttcggcgcactgggcctggctgaggcaaaatgccatcggcagatacaccagggggtacttcgccagggtctccgctgaaagaaa
		aactttgcaataactcgatcctcaacatctaattcaccgtatacagcacttgggcgaatgatagtatgattgaagcatccacgacggctataatcttcaactaatcgttcaccggctagtttcataatgccatactgaccttgtggtttacagtcataatcttctgttacatcatctgtaaagtcaccatacaccattgaactactaatataaacaaatttctttattttatgtttcttactagct
		tagaggatggtgggaggaagacagggcaaagacccagcagttttacaatcaagaaattggtcagtggggtgatgcgcctatgtattgtgatggctggattaataaagccattctattacaacatttgtattcgcctgctatgtgggcaattttccaattacaagattttatgggtattgatgagtcaataagaagagctgaccctaatgaagaacgtatcaatgtgcctgctaatcctaaacattattggagg
		tttcatgtacggtagaagattcattgtcaataacaacaacctcatgtcccaactcaatcaatttatctacaatatggctaccaataaacccagctccaccagttacaatacttttcatgttatctccattacgatttgtttttctatttgtgattctctaaaagaccattcttcattatacttatctcgcataaactgtggtgtaatccgatataatacatcatccatctcatcaaatgcggcag
		ggtcaaagcgcttgcgcacctggctgcgacagacctccgcctccggcaccatggcgttccagcgtggcggccactcgatcgatatggggtagggggcgatgtggcagacatgaccctgaaccgtcacggtcatgtgctcgcggtcgatctgcgcctccacatagcggtcgaccgtggccaggaagttctggcagtgctgcagcgtgtggaagccgaggatgtcgc
		ctctttatcaacgaggattcgcataagctcaggtatggcaagggcgcaacgactgccgccgagatgaatggcgacctttttgtcaaaatcgcccatatcgctgttatgccgtttgtatcgccggacaatgtcctggatagtggcactaacgaaaaaatactgctgtttcattcgtgaatcagtcgcgcggcgaacatcttcatcgggaaacagcatttgcgttatatgactgaacttggatttgt
		tggacatggagtggcacaaggaagggtgggggcactgggagtttgatccggagctgatccccgatccggcgcggttctttgcccgctgccgcgaactcgggctcgacgtgacattcaacgaccacccgctggacgtgcgcgaggacgattgccattttgaggagtat
		aattgtttttatagataatttaagtgaatctaaatgttaggggtgagtgatgaatccattggcagattacttgtttgagatatcatgggaagtctgtaataaagtcggaggcatatacacagtcctgacttctaagactgaacagatgcaggctcattataagaattatttcttgataggcccatattttgaacaacatgccaggatagagttttttagagattactcctccggaagtattcagacaggc
		caccacgcccctgcaggaggcgatcggtcgcggccacggcgtgaaggtcatcgacacgctcaccggcttcaaatggatcgccgccaagatgcgcggctacgaggagaagctcaccgcctccatggggcatggcttcaactacgcaagacgcccttccgcgagcgggccaagctgctccagcagcacagctgtttctacctcttcggta
		aacagcagaactcgtaaagaccgccgcaaactcattccttgcaacaaagatttctttcatcaatgcaatggctgaaatcgccgaagtgtctggcgcagacact
		acacgttcaacgaattcagcatcgaatacctcaacaagatccaggcgaactgcctgtggttccagccgatccatccggcgggctacgaccggtcggagaacgatcccggcacgggctcgcgctacaatccgggcagtccctacgcgacgcgggactatttttcggtgaaccacttcttctcgcgggcgggcacggaggaagcggccctgacggagttcacgaacttcgtggcgtattgcg
		gggtatgcaattaggtactaagttgggagcagatctcgttatcgcttctgaccctgacgcagaccgtattgctatcgtgtgccgcaatgacaagggcgagtgggtgattatcaatggtaatcaaacaatgtatgatgtattgctattacatcatcaataatatgaagaaactcggcaagatgcgcgatgatatgtacctcgtgaagactatcgttacctccgaactcattcgcaag
		gactggagcctcgaaccgggcagcggcggcctggtgacggcgatggccccggtgctgcgcgatcggcgcggcgtctggatcggct
		ggcacgtttggacgcagttcgaatactttcttgccgtggtgcagggctaggcgcggctcttgagccactagagactcgaggaattggaagagacgctgataggcgaggtcagaggcttggcggtagtgcaccgctatgttgtattccttgttttccagccgcactccctcaaactcctcatctcccacgaattcctccaccttcgcaaaggtcccct
		caatctgaatcattagaagcgggccgccctttgtgaccataaatggttttataacttcagcaagctttccaatatatttttcagctgcagccatataccttgg
		tctccattacattcaagatggatgcaggcccataaagatcagcctctgcaatcagaacaccaatcagacggctctgcgaagtaactaattgacgagcagcgttgcttgggcgataggagagttctgtaatcgccttctcgaccttttcgcgggtagcaggcttcaagctcgagtggttatttaaaactcgcgaaactgtctgatgtgaaactcctgcaagttttgccacatcataaatattcg
		ctatcttcccgcctttcatacggcggtgaaggaggcggatgtgcagtcgtttatgtcggcgtataacggcattaatggctcgccctgttcggtgaatcgttggctgctgaatgatttgctgcgtggcgagtggggttttgatggaacgattgtgacggatgttggggttccgaagtggctcttccagcggcatcaatatgtggcgaacggtccccaagcggcggcggctatgctgtcggcagggatcgatta
		acggtagaaaagcaaagtgctgacccaaagagcaccttgaatctttatcgcaccgcgttaaaactacgtgcagatcatttgatttctcagggtgaaatcacctggctggaatctccagaacatggcgcaaaaggctcaaacttgctggcggtacgtcgaggaaatgtttcgatctatatgaatctgtctgattctgctgttgaggtagaaatcactgggaagct
		cttgagataggttgtggagcaggaccagcgtttggccttcatagatgcgcacatgggccagcagggccgggtgggcggtgggcagtagacgcagctcgccccgcccgaaggctggtgctgccggcggcggcgcagcaggtcgcgggtccagttgagcagcgatgccgggtcggcggcttgggctttgacattgacgtgctccggcccaaaggggcgccctcgacaacgggcgcatagagcgcctcggccgg
		aatccatttgatcaacctggtgtagaagcatacaaagcaaatatgtttgctcttctgcataaaccgggatatgaggaggctgcaaaaaaaatcaaggaacgactaaaaaataactgatttacagtgatggtattactaaaaaaggaagcatataagcttcctttcttaattcta
		ggagcgcaactgggacacccgccatgcctggctgcgcgactgcgcccatgctctggaggtcatgctcgatcacggccacgaccgcgaggccctgcagctgcg
		cgattgaccatgaacaaccagatcaatgtccacctttgagtgattgataacgctgaattcagatttgtccattttgaattcaagatgtgcctcgcggaaattaatacggaacgaatacgaattccagccatttgggataaacggattgaaatgtaatagtccgttgcgaaccctcattccaccgaaaccttgaacaaaagccatccaggttcctcccatgctggtaatatgcaatccatcacatgtgtcattg
		cctgttggtacggcagctattgtacgtaaaacaattcaggatgaattggataagcgtggggtgtcaattgattttggagttgcatctaatcctgaattcttgaaagaaggagatgcaattaatgattttatgagtcctgacagagttgttgttggtgtggagaca
		gaagttcagcaataaagaccaatggagtgacgccgagaaggtggattgtattggcgaatcgagagttggcggaactgtactcgcatatgctggggtcatgggagtgggcgaaggacttgaacaagcttaagaacctactcagcagagtcagctacccgagcttccaggagcgcttccacgctgtgaagcagaagaataaggaacgcctagctgcttggatcctcaaagaaac
		tagcatcctcttgttcttgattggatgtaatgatacgcacctctttgtccgagatgcatagtattttcgacgatgtgtcgaatgattggtttttcttgatacggcagacagcacttcgggtactgtttacccaaatcgtggaatcttgaaccagcacctgcggctggaattataactgcatc
		aaagcctttgaaactcacctcgaccgactgaaagaacttggagtcgatatactttggtttatgccgattcatcccattggactgg
		gggctcaccgcgatcatcaccgacgcgatcgggacggggtggatcagcgatctcacccagctgcggaggctcgccgcgctggccgatgacgctgcgttctccgccgccttccggcagtcgaagcggaaggccaaggaggatctaacggcctggatccgcgggacgtacggagtggtcgtcgacccggacgccatcttcgattgccaggtgaagcgcatccacgagtacaagcggcagctcctcaacgtg
		gacggtgttcagcaagtgatcgttgccgcagctccaagccccgttgacaagattataggcgcacatcaccgatccaggctggcccttctcgatggcgatctggaaagccaacagatcgctctcgcgatgcgccgcctcctcgatcaccgaattggcgaagtggcgattggtctcctgaccgttcagcgaaaagtgcttgacggtcgagacgacgccctggtcctggatgcccttgatcgacg
		aaagaccaccacgctaagcccggcacgctgaatgtgccgcgggctgtgtcaaaatccgcctgctggatgacttcgtccgtggaggcggcctgctacggggatgcagctcaaatttgaggcccttcgaactcagcggcagtaaagtggcaccggctgcggagccgcattgaacagcaccacgatctggttgtactgcgggtcaaagttggcggtatccttcagttgcatgacgatcaggccggggat
		gcccaattctcctacggtatggatggctgcaggtgcattatggatattggattcgagtatcaatattacgatggagccattcagggcttttgttgcggataatttaaatgaaaacagagatcttacgggtttgctatgcaaagtatgtttattggcttggcttcatttattgctggctatctacctcaattattagcaaactggtttgatgtgtcaagggataaaatcaatggaaccattccacagaatta
		cgcgcatcggggacggataaaacggcagcaaccagatggccgtgacgccaagttcctgcagataatccagtttctccatgagtccgcgaaagtcgcccatgccgtcgccatcactgtcgcaaaatgttttaacgtgcagctcgtagatgatggcgtccttgaaccaaagcggatcgacgga
		caattctttcgcccagcccaataataaccgggcatcttccatggaatatgcccgacccccacgcatgggattttcttcatgcaaggagatacctttcaaaaaacagatcgtttattcaataagatatccgaaccatttgtttcaatcgttcgaaatccaatcttatcttctattgtttcttcgttgctttc
		tgttatgttgataacgcagtgcaggccaacttattggccgccacaacccaggccactgaggctataaatcaaatttataatgtagcatttggtgatagaacttctttgaaccaactttacaaatcaattttaaagaatcttacacaccattgccagctgcctgttgctaaagttatttatcgagattttcgagccggcgatgttcgacattctcaagcggatattagtaaagcaaaattatttcttggtt
		ggtgggcgcgaagtagcccgtgacctggtagccccaggagccgccgaaggggtgctccatg
		ctaagtcaccagaccagattcgcccaatctcacgtaaaccgtcgatccccagtatcggatccaccgcttcaagcgcttgagtttttgggtcgcgcaaggcaatatccaaccacggtgagagcaacaccaggtgctgcggcaaaggatgcccttcatgggccaactgctcacac
		cgtccgataccgccatgccgatccgctcgtaaccgcgcttggtcttggcgttgtagtacatgacaaagggatgaccgagggtcttgtccttatcccagatgacattcgatttgtagagcgtcagcttctcgaagtggcgggcgtcgggttggcccggcgtgaggatcggatccggcagccggttccattccgtcgcctgggtcggatccgt
		cggcgatcatcgccacgcccgggtggtaatggtgcaccagatcattcacgcgtttcaggaaatcgatcgcctccagattctcgcgtccgccgtatttgttgggaatccactgcccctcgttgcgggagtaatcgagatacagcatcgacgccacggcatcgacccgcaggccgtccaagtgatagcgttcgagccacgccagggcgctggcgatcaggaaacaacgcacttcgttgcggccataattaaag
		gggttccagttctgccgccaggcgtcgatgaccagcttgccgtccgcccacagtttcacatagctcgagacataaaggcggaacttgtgaatgccgctcttgtccgcgctcacatcgcccgtccacacgacccgctgctttccaacaacgacgccggcagtgttctgacctgtgcccgatgaagcgacagtctgcgccttggccgcttccggccagttcttctggtcgcggatgaactgatagttg
		actgagtccttcgacttcgacgcgttcaacgtcggcgactactaccgtgccgtggacgcaaagattgcctccgaaacaatcaccaaagtcctctatccgaatgacgagccggaggcggggaagcgacttcggctgtcgcagcagtacttcttcgtcagctgctctttgcaggacatgatccggctgcacctggcgcggcacaaaccgctgcaggcattcgacgcctgctgggccgtccag
		ccaaagtgagcagatgcctattcaatactacattaccaacttgaacggtaccatgaatgtaatcaataagattaagacaaagaattttatctttgcaagtaccggtgctgccgaagcgtgtaatagtgcgtatggaatcagtaagagagcagcagaggatgtcgtaaaagaatattgtaccttacacaacccaacaccatatacgatttttaggttctacaatgtcattggtactagcggatatgctcctact
		ctgacggtaatcggcagccatggctacgaatggtggccagcggacggcgacaagcgcatcatgcagcccatcactcccgagcaacaacatggactggcgatcattcgcgataccttgcaacgatccggccacgcccacaaattggaagtcaagctcgcctctttggccttgcacactcggggcatggacccggccgcggccgtgagcacggagcaggaaacggtggccgagtggggggcttggg
		tccggcgcataggcgcggatgcggcaaaggtcctagtgtggcagcgccacgacgcgacgaccgagacgaaggcgcatcaggctgcttttgtcgaggcctgcgggcgcgcgtgcaaggaagcggacttggtccacctgctcgagatcctgatctatccgctgccaggcgaagacgcggcgacaacgccggagcagcgcgcagagcgtgtgatcaagtcggtagaggattatctggg
		gaagcccaccgacttccagagcgtcgtggagtagtagaagatcacgttgatgccgacgaactgctggaacaccgacaggatgatgccgacccagacgatcgactggagcccgagcacgggcccgcgcagcgacacgcccgagttcttgcggtcggactcgatcgcgttggtcagctcgcgcatcgtctgatcgagatcggccggcggcacgaggcgggagaagatctccttcgcctcggcggc
		ctgctgcgcgaagcgcctgagtaatggaatgaacctcaggcaaattttgactgtctgtaccgagttgcttccagatgaaggcgaatggcatcaagtcgcgaaacagtctgcacctcggtttgctaaatagagaatgacatcgagcaactcgcaaaatacatctggattgctccaattgagatcccattgccatgagttgaatgtggtccaaacccatccttggagatcgtccg
		gccaattatttaagtgttggcccaaataccgaaattcaatatttatccggaacgggtagcgaccacaccgttaactgggatttttttgcaccggtggccaaaattcaggtaaatggacaaagattccggtcccttcaaattgggaacttcagggtttcggaactta
		acgttggttttcactgatcagaagcacttcgggcgcggccaggtcgagaaccttgcgcaagattttgatgattgtgtgcgtctgcgacaggtgtatgcaggcggtgcccggctctttccacaggtaagcgattgcatccaaacggataatcgttgcacccctcgccacgtatctgagcagaacatcgatgatttcaaccaggacctgtggagaggcataattcaggtcgatttgatcag
		cccatggaggccaggtgcccaggcggtcccccggggatctccgagagcagctcgggcagacgatcggccggggcttttcgtcgaaacgcgttattcgcccggttttgtcggtcgtcacgatcccaaggcccgcggtttggtccggggctacgggaatcaccgccaccgtggcgtcagcctggctatcccggtgggtctccagcatctggcgaaaatccatgctgtacagctgatcgccggaaagaatca
		ctttgtgttgctgcttttagtgcatctgtaacaacatcgacattcatatgtcctataacttcagcaacgtcttgtatcatattaactagactaatcttagcactaatatatgtgttatagaatattttaattgcttctgcttcttcccaagtacctacattgattctaggattgttctccattaagggttgatagaagtctgtaagtattttagcatcacctgtaatagagccatcat
		ggccatagagggcagggagattggcgcccggctgacccggctgatgcaggcgcgcgtccgcgaactcgatcccacgcggccggcgacggtggctacctccaataacgacaagagcggcaatgccacggtgaccgaggtcgccggcttcaactatcgcgcgcagcacgatgccgacgcctatcaccgcgcccgccccgaaacgccgatcgc
		ggcgaaggcgttaatttcgcgctgttttcagaaaatgcgacgggagtggaactgtgtctgtttgaccatcccgaccaggagaaggaaacgcacagcatccgaattgaagagcgcacgaatcaggtgtggcatgtcttcctcccggaggcccggccgggacagctttacggctttcgcgtgagcgggccgtatgaaccacaagccggccaccgcttcaatccgaacaagctgttgatcgaccc
		ctgtttctcctgtctccgccgtagagctgggcgttgatcttccgcagatccggaggattctcagggatgttggtgtcgagcaggtaaagggctatccgtccgacgcgagcctccatacattcgccttgagcgggtgttccggcatgggtatcgtgatgctgacctgatggccgtccggcccgaccgccgggctaagcggcatgtaatgcagttcattttcggggtatttctcctgctgccagccgtccttg
		acctggagatatttacagacttctgatcatttttattatatgtccacaaagtactggagtgatggagacatacatacatactttagtcactatgagtcaccatacgatgcatatattaactatatgaatattttgaatgattttaagcagaaattacttactaccaaatgaatgtaaatttataacagtcagcttacctcttgttaaaagttctattgtttctgttaatccttgcatcaattgtccagaa
		acctgcgcgagttgaagtgcctggagccgtttgccgacgaccccgcgttccagtcggagtggcggcagatcaagcgggccaacaagcaggatctcgcggacgttctcgaggcacggaccggcgccgtcctggacgcggacgcgctcttcgacatccaggtcaagcggttccacgagtacaagcgccagcacctcaacgtgctgcacatcgtcacgctgtataaccggntgaagggaggcgcgccactt
		ggttcattcttcaaaccataaccagatgatgtagatgaatacattactttcttaacacctgcttcttcttgcacattgtagaactgttcctgtacctagtgtattggtacgaatggcaagtaatggatttaaaattgctggttgaatacgagattcagctgcacaatggaaaacaaaatcaacaccatcatacaatggtcttgttgcttcatagtcagcaatatctaacttgtgat
		gcatcaaccaaataaacaagatggctgagctgggcaccaagattgcccacatcgacggtaacgtgccaaacatcaacattgaaattcctgagttgagcgagtataacattggtgccatgatctacttcttcgagaaggcatgcgcgctgagcggctataccctcgacgttaacccattcgaccagccgggtgtggaggcatacaaaagatatgtttgccttgct
		tgaacgtgtttgtaatccactacccaaacttcgataatgtctccgtcttttgcttccgcagcttttctacacattgctgctggtgatttttctctaccaccgtaccaagtaccttgtggcccaaatatgttgtggaatcttgcaactctaacatctaaaccatagtttctatgaaacgccaaatataatcttttccgagaataattttttcccaaccatatttca
		gtcattccctccctcgccctcgtggacatctggcagtggacgcccatggtcaccctcatcgtcctggcggggctggcggggctctcccaggagccctacgaatccgccaaggtcgacggagccaacgccttccagaccttcacccagataacgctgccgatgatcgcgcccacgcttctaacctccatgatcctgc
		gcctctttccatgggcgtatttccggttttacaattattttggtaaccagattttcgccaattgcagaagttgtgctcattagtgaaagaatacctacacctttgggtttaccagttacaatactgcctttgccttgttgtttctggatgaagccgtcaacgacaagtctttcgagtgcattccttactgtaggtctggcaactttgtataatgaactaagttcattttcagatggaag
		aaataattaaaaaagcagttccaaaaatgctcactatctattgaagaaagtgctgcaagtatatttgcattaactacatcttttacatttgtaaagtctctttttgttgatccgtctccaactattgtcattttttaccatctatatttgtcttaaaaatagtccaataactggtgcatactgtccttttgttggatgacgatctccataaacattaaaatat
		ggtagagtcagtgtggtgggtgattttaatcgatgggacgggcgatgccatccaatgcgcagttt
		aaaacgaatattggggcggaactcatggcgtggccacgccgacacgggtcatcaagcaggccgatgtcgtgaccttgctggtgttattccctgatttatt
		tatcgtgcaggcggcccgcgaactgggcgtcgaaaaatcgtccacacctccaccagcgaggtctatggcaccgcgcgcttcgtgcccattaccgaggatc
		ttgtgatgggtgaaccttgttatgttgctgaacaaagttttgaatcgcccgacgacgaatttattttcgggttgggacaatttcaggatgggcaatacaacctgaaaggtttcacacgtcgcttaacacaggtaaatacacaaattgcaatcccattca
		gaaggcgaaggatcggaccgcgaattcgaaatgcctttccatcaaagcgaactgatcgaaaagatcttggcagtcaatcccaatacggttgtggttcttaatgccggtggaaatgtggacatgaatccatggatcgatcaagcaaaaggacttatccatgcgtggtatcctggtcaggagggagctttggctgttgccgaaatca
		gccggcgagatcacggagcgcacgctgccgcgtccggtgcatccctatgccagctcccatcgctgcggcgaggacgccgtgcttgaggcgcatgaccgccgacgcctgaccggtgtcgtcgtgcgcctctccaacggcgtcggcgcgcccgccgacccggccagcaaccgctggaccctgctggcgaacgatctctgccgccaggccgt
	Fermentation	ctggcggcattcatccaggagcgcaccggcgtcatcgtcgaccccgcggcaatcttcgacgtgcaggtcaaacgcatccacgaatacaagcgccagcacctgaacatcctgcacgtcatcggcctgtatcaccgcctgaagacggatcccaagttcaccatgcagccgcgcgtgttcgtctttggcggcaaggcggcgcccgggtatttcctggcgaagctcatcatccgcctcat
		gcagtcccgcgagtcccaggtcgccgcggtgccgtcccgcttcgtcggcaacggacgtcaggtgcgtggcgacgagcgttcctccggacacaacgtatcgctctagttcggcgcactgggcctggctgaggcaaaatgccatcggcagatacaccagggggtacttcgccagggtctccgctgaaagaaa
		aactttgcaataactcgatcctcaacatctaattcaccgtatacagcacttgggcgaatgatagtatgattgaagcatccacgacggctataatcttcaactaatcgttcaccggctagtttcataatgccatactgaccttgtggtttacagtcataatcttctgttacatcatctgtaaagtcaccatacaccattgaactactaatataaacaaatttctttattttatgtttcttactagct
		tagaggatggtgggaggaagacagggcaaagacccagcagttttacaatcaagaaattggtcagtggggtgatgcgcctatgtattgtgatggctggattaataaagccattctattacaacatttgtattcgcctgctatgtgggcaattttccaattacaagattttatgggtattgatgagtcaataagaagagctgaccctaatgaagaacgtatcaatgtgcctgctaatcctaaacattattggagg
		tttcatgtacggtagaagattcattgtcaataacaacaacctcatgtcccaactcaatcaatttatctacaatatggctaccaataaacccagctccaccagttacaatacttttcatgttatctccattacgatttgtttttctatttgtgattctctaaaagaccattcttcattatacttatctcgcataaactgtggtgtaatccgatataatacatcatccatctcatcaaatgcggcag
		ggtcaaagcgcttgcgcacctggctgcgacagacctccgcctccggcaccatggcgttccagcgtggcggccactcgatcgatatggggtagggggcgatgtggcagacatgaccctgaaccgtcacggtcatgtgctcgcggtcgatctgcgcctccacatagcggtcgaccgtggccaggaagttctggcagtgctgcagcgtgtggaagccgaggatgtcgc
		ctctttatcaacgaggattcgcataagctcaggtatggcaagggcgcaacgactgccgccgagatgaatggcgacctttttgtcaaaatcgcccatatcgctgttatgccgtttgtatcgccggacaatgtcctggatagtggcactaacgaaaaaatactgctgtttcattcgtgaatcagtcgcgcggcgaacatcttcatcgggaaacagcatttgcgttatatgactgaacttggatttgt
		tggacatggagtggcacaaggaagggtgggggcactgggagtttgatccggagctgatccccgatccggcgcggttctttgcccgctgccgcgaactcgggctcgacgtgacattcaacgaccacccgctggacgtgcgcgaggacgattgccattttgaggagtat
		aattgtttttatagataatttaagtgaatctaaatgttaggggtgagtgatgaatccattggcagattacttgtttgagatatcatgggaagtctgtaataaagtcggaggcatatacacagtcctgacttctaagactgaacagatgcaggctcattataagaattatttcttgataggcccatattttgaacaacatgccaggatagagttttttagagattactcctccggaagtattcagacaggc
		caccacgcccctgcaggaggcgatcggtcgcggccacggcgtgaaggtcatcgacacgctcaccggcttcaaatggatcgccgccaagatgcgcggctacgaggagaagctcaccgcctccatggggcatggcttcaactacgcaagacgcccttccgcgagcgggccaagctgctccagcagcacagctgtttctacctcttcggta
		aacagcagaactcgtaaagaccgccgcaaactcattccttgcaacaaagatttctttcatcaatgcaatggctgaaatcgccgaagtgtctggcgcagacact
		acacgttcaacgaattcagcatcgaatacctcaacaagatccaggcgaactgcctgtggttccagccgatccatccggcgggctacgaccggtcggagaacgatcccggcacgggctcgcgctacaatccgggcagtccctacgcgacgcgggactatttttcggtgaaccacttcttctcgcgggcgggcacggaggaagcggccctgacggagttcacgaacttcgtggcgtattgcg
		gggtatgcaattaggtactaagttgggagcagatctcgttatcgcttctgaccctgacgcagaccgtattgctatcgtgtgccgcaatgacaagggcgagtgggtgattatcaatggtaatcaaacaatgtatgatgtattgctattacatcatcaataatatgaagaaactcggcaagatgcgcgatgatatgtacctcgtgaagactatcgttacctccgaactcattcgcaag
		gactggagcctcgaaccgggcagcggcggcctggtgacggcgatggccccggtgctgcgcgatcggcgcggcgtctggatcggct
		ggcacgtttggacgcagttcgaatactttcttgccgtggtgcagggctaggcgcggctcttgagccactagagactcgaggaattggaagagacgctgataggcgaggtcagaggcttggcggtagtgcaccgctatgttgtattccttgttttccagccgcactccctcaaactcctcatctcccacgaattcctccaccttcgcaaaggtcccct
		caatctgaatcattagaagcgggccgccctttgtgaccataaatggttttataacttcagcaagctttccaatatatttttcagctgcagccatataccttgg
		tctccattacattcaagatggatgcaggcccataaagatcagcctctgcaatcagaacaccaatcagacggctctgcgaagtaactaattgacgagcagcgttgcttgggcgataggagagttctgtaatcgccttctcgaccttttcgcgggtagcaggcttcaagctcgagtggttatttaaaactcgcgaaactgtctgatgtgaaactcctgcaagttttgccacatcataaatattcg
		ctatcttcccgcctttcatacggcggtgaaggaggcggatgtgcagtcgtttatgtcggcgtataacggcattaatggctcgccctgttcggtgaatcgttggctgctgaatgatttgctgcgtggcgagtggggttttgatggaacgattgtgacggatgttggggttccgaagtggctcttccagcggcatcaatatgtggcgaacggtccccaagcggcggcggctatgctgtcggcagggatcgatta
		acggtagaaaagcaaagtgctgacccaaagagcaccttgaatctttatcgcaccgcgttaaaactacgtgcagatcatttgatttctcagggtgaaatcacctggctggaatctccagaacatggcgcaaaaggctcaaacttgctggcggtacgtcgaggaaatgtttcgatctatatgaatctgtctgattctgctgttgaggtagaaatcactgggaagct
		cttgagataggttgtggagcaggaccagcgtttggccttcatagatgcgcacatgggccagcagggccgggtgggcggtgggcagtagacgcagctcgccccgcccgaaggctggtgctgccggcggcggcgcagcaggtcgcgggtccagttgagcagcgatgccgggtcggcggcttgggctttgacattgacgtgctccggcccaaaggggcgccctcgacaacgggcgcatagagcgcctcggccgg
		aatccatttgatcaacctggtgtagaagcatacaaagcaaatatgtttgctcttctgcataaaccgggatatgaggaggctgcaaaaaaaatcaaggaacgactaaaaaataactgatttacagtgatggtattactaaaaaaggaagcatataagcttcctttcttaattcta
		ggagcgcaactgggacacccgccatgcctggctgcgcgactgcgcccatgctctggaggtcatgctcgatcacggccacgaccgcgaggccctgcagctgcg
		cgattgaccatgaacaaccagatcaatgtccacctttgagtgattgataacgctgaattcagatttgtccattttgaattcaagatgtgcctcgcggaaattaatacggaacgaatacgaattccagccatttgggataaacggattgaaatgtaatagtccgttgcgaaccctcattccaccgaaaccttgaacaaaagccatccaggttcctcccatgctggtaatatgcaatccatcacatgtgtcattg
		cctgttggtacggcagctattgtacgtaaaacaattcaggatgaattggataagcgtggggtgtcaattgattttggagttgcatctaatcctgaattcttgaaagaaggagatgcaattaatgattttatgagtcctgacagagttgttgttggtgtggagaca
		gaagttcagcaataaagaccaatggagtgacgccgagaaggtggattgtattggcgaatcgagagttggcggaactgtactcgcatatgctggggtcatgggagtgggcgaaggacttgaacaagcttaagaacctactcagcagagtcagctacccgagcttccaggagcgcttccacgctgtgaagcagaagaataaggaacgcctagctgcttggatcctcaaagaaac
		tagcatcctcttgttcttgattggatgtaatgatacgcacctctttgtccgagatgcatagtattttcgacgatgtgtcgaatgattggtttttcttgatacggcagacagcacttcgggtactgtttacccaaatcgtggaatcttgaaccagcacctgcggctggaattataactgcatc
		aaagcctttgaaactcacctcgaccgactgaaagaacttggagtcgatatactttggtttatgccgattcatcccattggactgg
		gggctcaccgcgatcatcaccgacgcgatcgggacggggtggatcagcgatctcacccagctgcggaggctcgccgcgctggccgatgacgctgcgttctccgccgccttccggcagtcgaagcggaaggccaaggaggatctaacggcctggatccgcgggacgtacggagtggtcgtcgacccggacgccatcttcgattgccaggtgaagcgcatccacgagtacaagcggcagctcctcaacgtg
		gacggtgttcagcaagtgatcgttgccgcagctccaagccccgttgacaagattataggcgcacatcaccgatccaggctggcccttctcgatggcgatctggaaagccaacagatcgctctcgcgatgcgccgcctcctcgatcaccgaattggcgaagtggcgattggtctcctgaccgttcagcgaaaagtgcttgacggtcgagacgacgccctggtcctggatgcccttgatcgacg
		aaagaccaccacgctaagcccggcacgctgaatgtgccgcgggctgtgtcaaaatccgcctgctggatgacttcgtccgtggaggcggcctgctacggggatgcagctcaaatttgaggcccttcgaactcagcggcagtaaagtggcaccggctgcggagccgcattgaacagcaccacgatctggttgtactgcgggtcaaagttggcggtatccttcagttgcatgacgatcaggccggggat
		gcccaattctcctacggtatggatggctgcaggtgcattatggatattggattcgagtatcaatattacgatggagccattcagggcttttgttgcggataatttaaatgaaaacagagatcttacgggtttgctatgcaaagtatgtttattggcttggcttcatttattgctggctatctacctcaattattagcaaactggtttgatgtgtcaagggataaaatcaatggaaccattccacagaatta
		cgcgcatcggggacggataaaacggcagcaaccagatggccgtgacgccaagttcctgcagataatccagtttctccatgagtccgcgaaagtcgcccatgccgtcgccatcactgtcgcaaaatgttttaacgtgcagctcgtagatgatggcgtccttgaaccaaagcggatcgacgga
		caattctttcgcccagcccaataataaccgggcatcttccatggaatatgcccgacccccacgcatgggattttcttcatgcaaggagatacctttcaaaaaacagatcgtttattcaataagatatccgaaccatttgtttcaatcgttcgaaatccaatcttatcttctattgtttcttcgttgctttc
		tgttatgttgataacgcagtgcaggccaacttattggccgccacaacccaggccactgaggctataaatcaaatttataatgtagcatttggtgatagaacttctttgaaccaactttacaaatcaattttaaagaatcttacacaccattgccagctgcctgttgctaaagttatttatcgagattttcgagccggcgatgttcgacattctcaagcggatattagtaaagcaaaattatttcttggtt
		ggtgggcgcgaagtagcccgtgacctggtagccccaggagccgccgaaggggtgctccatg
		ctaagtcaccagaccagattcgcccaatctcacgtaaaccgtcgatccccagtatcggatccaccgcttcaagcgcttgagtttttgggtcgcgcaaggcaatatccaaccacggtgagagcaacaccaggtgctgcggcaaaggatgcccttcatgggccaactgctcacac
		cgtccgataccgccatgccgatccgctcgtaaccgcgcttggtcttggcgttgtagtacatgacaaagggatgaccgagggtcttgtccttatcccagatgacattcgatttgtagagcgtcagcttctcgaagtggcgggcgtcgggttggcccggcgtgaggatcggatccggcagccggttccattccgtcgcctgggtcggatccgt
		cggcgatcatcgccacgcccgggtggtaatggtgcaccagatcattcacgcgtttcaggaaatcgatcgcctccagattctcgcgtccgccgtatttgttgggaatccactgcccctcgttgcgggagtaatcgagatacagcatcgacgccacggcatcgacccgcaggccgtccaagtgatagcgttcgagccacgccagggcgctggcgatcaggaaacaacgcacttcgttgcggccataattaaag
		gggttccagttctgccgccaggcgtcgatgaccagcttgccgtccgcccacagtttcacatagctcgagacataaaggcggaacttgtgaatgccgctcttgtccgcgctcacatcgcccgtccacacgacccgctgctttccaacaacgacgccggcagtgttctgacctgtgcccgatgaagcgacagtctgcgccttggccgcttccggccagttcttctggtcgcggatgaactgatagttg
		actgagtccttcgacttcgacgcgttcaacgtcggcgactactaccgtgccgtggacgcaaagattgcctccgaaacaatcaccaaagtcctctatccgaatgacgagccggaggcggggaagcgacttcggctgtcgcagcagtacttcttcgtcagctgctctttgcaggacatgatccggctgcacctggcgcggcacaaaccgctgcaggcattcgacgcctgctgggccgtccag
		ccaaagtgagcagatgcctattcaatactacattaccaacttgaacggtaccatgaatgtaatcaataagattaagacaaagaattttatctttgcaagtaccggtgctgccgaagcgtgtaatagtgcgtatggaatcagtaagagagcagcagaggatgtcgtaaaagaatattgtaccttacacaacccaacaccatatacgatttttaggttctacaatgtcattggtactagcggatatgctcctact
		ctgacggtaatcggcagccatggctacgaatggtggccagcggacggcgacaagcgcatcatgcagcccatcactcccgagcaacaacatggactggcgatcattcgcgataccttgcaacgatccggccacgcccacaaattggaagtcaagctcgcctctttggccttgcacactcggggcatggacccggccgcggccgtgagcacggagcaggaaacggtggccgagtggggggcttggg
	Monosaccharides	ggcataggaagctatatgaaaaatggttatgtccctgaggatgttagcacctcttctgtttcgaagactctcgaatatgcatacgacgactggtgtattgctcagatagcgaagaaagccggcaaggatgatatttataaagaatatatccaaagatcagaaaattacatgaatgtttatgatagtctgtcgggttttatgcggcctaagctttcggatggtaaatggcgtaaggaatttgatccaatgga
		gcgggcgtcctgctcggctcgcgggccctcaccgtgtggatcggtgacggcgcgaatttcccgggacagtcacacct
		tactactctagctggttatgttcattggaaactgactggtcaaaaagtacttggtgtcggcgaagcctctggtatgtttccagtcgatagcaagtttaatgattacgataaagctatgatagaacaattcaatgagagacttaaagctgagaaaatatcttggaagttccaggaaatattgccaaaagttcttcttgctggtgacgctgctggtgttcttaccgcagaaggtgcaaaactg
		ttgcataatgtagtgctttccaatttccatagtaatcaatactcgaccaagttggagccggccaacaatcgtttaattgccaaaaaagaagttccca
		aatgaatagtctgtgagatttatagctaagatgatgttttcgcctatatggcagtgaagcggctgttctgctacaatatatctattcgaataaacaaaccaaactatgaaactcatcatcttcgccggcgggatcgggacgcggatgtggccgctctcccgggaattagcgcccaagcaattcgacaagatcttcaacggcaagtccactctccagctggccatcgaacgcgtggcgccgtcttt
		ggcgcgctcccagtgaccctgcgtgcgaaaggtgcggctgctaagcccgccgatggcgcggttgacgatgttcaccttcgccggattgaaatggtccgccagcggatcaccccagccccactgcccgccctcaccgtcgccgcgtccgttgcgcaccgtggagtcgccgatgagaaagata
		cgaccgcctgcacgtccggcggcaaggcgtccagcgttgccagggcaggaacatggtagtgggcagcgatcttttcacggcgtttttcatcggtatcaataatgccgcacaactgagatagcggatgctgcgcgagaatgcgcgcgtgatgctgccccagagagccgacgccgatgatggctgttcgtattttctgcatttatccct
		gctggtataagtttccaggcaaccctttgagccgcaggagcagagttcgccatttcggtcaatagtggcgtggccaatttctcccgcaaaattcttaacaccccg
		ggatgatccgccacactgggactgagacacggcccagactcctacgggaggcagcagtgaggaattttggacaatggggggcaaccctggactccag
		taccagggaaattccttcacgtccgctcggatgatgacgcagggacgctttgcattcaaatacggcacgatcgaggcacgcattaaaatgccgaataccgcgaacggtttgtggccggcgttttggatgatgggcaacaacacgggcgctatcaactggcccggttgcggcgagctcgacattgtcgaaatgggctcaaaggatggcatcacgcagggactgcaacaggagaaaatgaactgtgccatcca
		caaatcgaccgcaagaaaatgtatccaggatgccacagccattttggccgacatgggcatccacatcgacgtagaaaccgtcctgagctgccacagcaccgcgattcagcaaatggtctccattgcccgggcgatttcaatccaggcccgattggtggtcatggacgagccaacctcttcactaggatacccaggaagtgaaagtcctaacctccgtgattgagaaattaat
		agggtaccccggtctacgtatgtcaggcttgcggagcagtggaatccgttgaaattcaatccggaagaatggcttgacaccatggaagcctccggtatggaatacctgaccattactaccaagcatcacgacggtttttgtctttggggaacc
		ttactgcctgatcggggtttcggcctgcatgtcgctgatgttcccgacgatttacggaatcgcgctcgacgggttgggcgacgatgccaaactcggttccgcgggccttattctggctattggcggtggctgcctcatgcctccgatgcaggggaagatcattgacatgcccgccttcgatctgggcttcatggagctggccagtgtccgggcgtccttcgtgctgccgctgatctgctttg
		ctgttgccggatcgtcgtcaaagcaaacgaccttgatcttgccggtcttctttgcatctttcaatgcgctgagaattgcagggccgttgtaattccacaatccaatcagggcggagacatccggatgcttcacgatggtgtctgcagcgtttgccttggctcgaacca
		ggggtggcccactacagttacctatcgagccaggtaagaaaatcgtctatatcaccgccggtacccgcccggcgatcgtcgacaaactcagcgatttaaccggctggcctgcggtagacggtttcaaagaaggcgaaccaccggcggaagagattggtctggcgattattgactgtgggggacgttgcgttgtggcatctaccctaaacgccgcatcccgactatcaatattcattcaactgg
		ccgtggggaagttttaagctttttaccaaagaaacaccatcgactgttaaattaattaatattataaaaggagagtcgctcagtttgcagtaccataagcatcgtcaagaattttggtatatcgtgcaaggggcggccttttattacaattggtgatacaaaaacttcggcc
		ggagctcttggcggtgccctctgggcagcgattccgggtgtcctccgtgcttatctacgcaccaacgaaatcatcacgtcactcatgctgaattac
		caatcataatcatattgatgttttgtcggttccttcggttttggttcaatatagaattgcccggtaaatccgatttctttcgcatagtcaactgccatatgaaggaggcgggcaaaattctgctgttccagggtcatgtcggtgttcaaaagggtgtc
		ggataacgtagcgaaagttacnctaataccgcatattctgtgagcaggaaagacaggggatcttaggaccttgcgctgattgagcggccgatatcagattagctagttggtgaggtaaaggctcaccaaggcgacgatctgtagcgggtctgagaggatcgatccgccacactggaactgagacacggtcctagactcctacgggaggcagcagtggggaattttggacaatggggcaaccctgatccagcca
		gcccagcagctcggcgccgacgttctggtcgaggcggccgagcgcgatgatgcgaaacagctgcagcaggctgaatcgctgctctcgcgcggcgtgcaggtgctggtggtggtgcctcacagctctgaagcggccgcgcagattgtcgaagccgcgaagaagcgttccgtgccggtcatcagctacgaccggc
		gaaacgccgcagccctaatttcatatgtctcaagccactgccgttattcataatccgattctcacagggttcaatcccgacccatccatccttcgcgtcggcgaggattactacatcgccacgtctacgttcgagtggtttcccggcgtgcagattcaccattcacgcgacctcgtccactggcgacttcttggccgcccgctcactcgcgcgagccagctcaacatgctcggcgaccccgattcgtgcggcg
		tgcgcgcttacgccatccagaaaacgatgaaatccatcgatctgggtgttgaatttggtgccaagacctacgttttctggggcggccgcgaaggcaccgagaccgattcaagcaagagcgcagtcgatgcgatcaagcgcaatcgcgaagccatgaatttcttctgtgaatatgcgctcgataagaagtatgatctcaaatttgccctggaagccaagccaaatgagccgcgcggcga
		cgatgcagggccccggcatcgtgcaggtgccgctcgcgctcctggccggcatcgtcgccggaggtctgtggggcggcatcgtcggcttcctcaaggcgcgcaccggcgcccacgaggtgatcaccacgatcatgaccaactacatcgccggtctgctgaccctctatctcctcaagaccgaggcgttccaacagcctggcaaggacaacccgatctcgaagaccgtcagtgccgagggtcg
		gccggcgaccctcgccgctgtcgaagagggcaagcacgtgctggtggagaagcccgccgctcggacggtgggggagctgcagccggtcatggctgcagcggcccgcacgggagcgcgcgtgcgcgtcggtttcaatcatcggtaccatccagcgctgcagaaggcccgcgagctcgtggaggccgggtccgtcgggccgctgatgttcgtg
		cgcccagttgttgacgccgccgatgtatttccaggcgtccttgggccatgtttcgtagccgaattcacctggatgcggcacggtgtggaaggtccacacct
		ctctttttgtccgtcgtgcaggtcatggtaataccaagtgtcgctgatgggccagcgatcttctgcgggaataaacgatttcatggtctcggcggtaggaatcgatggagttcccagttcggtggagaagccttcggcattgttgcggtaataatcggccgcatctttcatgtagtgccctgagacacgcaacaggggataggaaggcacacaggggatagg
		aggtattaattaagttgtagcgcaactatatcgcagccgctttagcgcccgaaatcatcctgcaagcgctcaatgtcatcctctccgaagtaggttcccgtctgaacctcaacgaagatgacatcttcatctccaatgtttgccagcctgt
		gagatacttagaaacgcaatcgaaacaggcacactggacaaacatcttcagaaagtgaacgtacacaagggggaattatactatttacccgcgggtacggtgcatggaattggcgccggcatattggcggtcgaaattcaggagaattcaaac
		atcattttctgtcaaattggctttatcatccgaccagcttttatctacatctccaatatcaacttcagggatataaacatcgtaacccaggcgtttgtatctttttatgttgttggtgtatgcatcccaatcgtaaatattctgcagatcgaggtgagtttgaaaagcaatcacatcaacaggtgcgccaacctttttaaggtgtactgccaactgataaaaagctgcgaatttgccgtcacccgggaattcg
		taacggatgcagtcgccgcaatctgagcacgccggcaacgcggttaacaagaacaagctttgcgatgcctaccgtcccaggtggtactgactgggagtgaagccctgttcctgtccgaaaagacgcgtgaaatgtgcttggtcagagaaacccagtcgggctgccacctgcacggggcgttgacccaagcgaagcatctcacgcgcgtgtgccatgcggacggcagcgtggtatttgtgcacggtg
		gcacgtggtcgacataaagcttgtagtagccgcgcttcggcggctccggcgccttccaggccgcgcggcgacgcgcaagttccgcttcgctcacatcgagatgcaggcggcgcgcgccgacatcgagctcgatcatgtctccggtcctaactagtgccagcggcccgccggccgccgcttcgggcgccacgtgcaacaccaccgtgccgtacgcggtgccgctcatgcgcgcatccg
		catttggaagttttcttctgccactgtttataattgcctgcggtctgacatgtcttgaaactgcagcgaatccatataccactgtacttggtccacccgaatcgggagaacgcaggataaatttttcacagtcattcaatggcctgggctggattgcaggaccgctggtaggaggtgcactgatcttttcggtgagcagcagcaacaatgcaaac
		ggcccactcgcttaagggcttgtcgcaaagcatcgagctgcgcattggtccgatgaatggcagcctgagcggcagcacccgattcgatctcgacgcgaagctgatgcacatgaatcagcgacgccacatccagcagatcatcatgcttgacctcaaaggggcgcagctccttgtcggcgcagacaaaggtccccacgccatggcgcgtctccacc
		gatgatggccgaaacaaaggtagagccgtaggcatcgcctgcgccagtagtctctacagcgtgcgtgctatgagccggctcatgcaggtgcctcttgccactcgctacatagctgccccgttcactatccgtcactaccacggtgccagtagtcatctgctgcaggcccgagaggatagctttgtngcgn
		gggggccatttcgccgcccgccaggtcaggaccatggcagctcgcgcagtactggccgtacaagggctcgccccgcttcgcctggtcctccgtgtacacgccatcccactgcgacttgccctgcgcagcgactgtgttggtcgtgctgagagcgccataaaccagggttcctgcaagtgccagaattgc
		gacaccatgcaggtgcgtgtttccacgctaaaatctacagaggcgggcgctcttggatgtgcaattttatgcgcgattgccatgggtgtgtacccggatgccgcgacggcaggcgaagcaatgagcgaaataaacgaaacgattgaacctgctgcagaatttgcatcgttttatga
		acctgcgtattgactgtgaatagggacatcgtacttcatagcttcttccacagcccatctgccttcgccgttgtctgctatgtaaccagggacgtcagagaggcccacgtgatgcttcagagagtcgcgtgccatctcgatcaagaaaccccttatgatgcttccattgcaatagacatctgatatcttcagaagatcaag
		ccagcaacggtgcataggaagccatccttaccacgtcgccgttgcgttcaagccctgtcatatacgctgcctcggcaatggcgttgcgcaatttattgccccacgaggcatattcccccagataaacttcgcccgatttacggtcgtaggagtcgtatcgatgttgatttttgataaaccaatcaggggtcggtgtagtaatgttcgtcaacaacctggacttttt
		ggagtctgggccgtgtctcagtcccagtgtggcggatcatcctctcagacccgctactgatcgatgccttggtaggcctttaccctaccaactag
		agggtacccggtctacgtatgtcaggcttgcggagcagtggaatccgttgaaattcaatccggaagaatggcttgacaccatggaagcctccggtatggaatacctgaccattactaccaagcatcacgacggttttgtctttggggaacc
		cctctacttcgacaacaccggcctgcccctccagcaagccggcctcgatatcgccgcccacttctacaacggcaacatcaaacgccgcggcaagctcgaagccgtcatcaacgccaaaaacctccccgaaaaccacaaagacgcactcgtcatggactacgaacgcggcagcgccaccggcatcatggaacgcccctggcaaaccgacacctgcatcggcgactggcactaca
		gctggctgcacggcccttcatcacccctaacaaaccaggcaaagcacgctgactgtatttagccaaaatttctgatggaggtgttaacttcaccaagcgatcttcatcagccattggtggcgcaagctcaggcttaattttggcgacaatgatcacataaccaatgtacaaagttgccaacatgatgcctgggaagaatgcgccagcatataacttaaccactgacacacctgcagttg
		ggtgtcgggcatgaaaagaatgtcgccataatcagaacaacctgttccgcttaaatgtgtgtggctgaaaccgtagatgatgctgtccgatgcatgataggcagagcatccgtcccatccttcaagtcgtgtatcaggacttaactgtaccattccgaatggcatactggccccgggataagtatggccatgcccgccggtaccaatgaatggatt
		gaatggagactgttgagaaggcttggggccgagagattatctttgtcaataatcatatgtattgtggtaaattgttggttcatgatagagctggatcgagagggtcgatgcactttcatatcaataagcatgagacattctacgttcaaaaagggtcgtttagaatttggtggatagataccagcaacgccaagttgaacaaagacatcattaaagagggtcaaacttggacaaatgagccaggcgaacc
		tggcgacatgatgccatcttttatcagtggttttgcgatatgatcgaccacgaaaatctgattttcggaaaacagctttacaaattcaatcgtattcggcagatgtttcgggaaaatcaggatgtcgtatgtgagcttatatttttcgagcagtctgactccgcggataaattcaggacggagcatgaagttgatatcttcttcatcgtgaatgacatggcgtacgcccacggctttgggatgtacgg
		caatcaaacattaaaactacagtggaaagattcttgccggattaccgatggccatgctgttcgatgggactttcattgttataagacttcctgctgcaatcacacttccgttgccgatggtgacgcctttaagaataatacttcctgcgccaatccagacattgtcgcctatggtgattggtctactgcttgccggtggtgcagggagatgtcgttcagcgggttttgatggatggccgtcatagtt
		ctggtcggcgggctgctccatcgtggtcaaggccgccgaagaaacaccggccgcgccggcggagctggtgcgtgcctttgtcgacgccggcgtgacccccggtgcactcaatctggtgtatggccaccccgccgaggtatctggcaccctgattgcccacccggcgatccgcaagatcagtttcaccggctccaccgccgtagggcgtgaactggcagccctggccggccgccacatgaagcggg
		ttgccgcaaataaatttaacacgtcgttttcactttcccgaagggctaattgtccgggccggttaatcccataaccgatcagtttccagttaaccaggtctttgctatggtaaacaggtaatcccggaaaaaacccgaatgttgaagttaccatgtagtaatcttctccaacgcggcaaatgcttggatcggggttcatgcccggaataaccggattgagatagtaattcccggcagctttctcatgaagtgaaaactgtgcatagtttggaaaaacggtcaaagataaaatcagtgttagta
		gcggtgctggcccagtatcgcgcccatgcccgcggcctggccgcctgccagggcaagaccggactctggcaccagctgctcgaccggaacgattcctacctcgagacgtcggcctcggcgatgtatgtctatgcgctggcccgcggcatcaaccggggctggctcgacccgcaggcctacggcggcgcgatctcgctcggctggaatg
		tgccgtgctaggtggcgtgaccggcgccgcgcacaagacgtgaagaaaccgtggcggcactggcagcccaaggacgtactgagctgcaactgcaccgcaaggtacaccgtccctggggctggtacgacagcatcgatgccggcgaccggttccaggtcaagcgcatcatggtcaagcccggggccagcctctcattgcagatgcatcacc
		taccaagcacggagcagaaagcgtgtgcccgatgctgccagcaggttgagggcgatgccactgatgatcgcatctacgcgaaaacgagccacgagcagcgcgtggagtgcggagatggctacgccggttgcgatgcctcccgcgatggcaacggggatgctcgcgcttcccaagcccgctgcgatggttccgaaggcgctggcaagcaagacaccttctagggcgatgtt
		gtaaggtagtttggggtcagcaattgttgttcctcctgatgttctcaggtaacaggaagccatatgcctatattacggtcacgaaccggagggatccagtcccagccaactgaacaagcattgtgacattcttgccaatatcgcctgttgtaccgccatttt
		aagacatgagttctggcatgttactgagggcagaggtgtacttgagatgaaattgactagcggatacagtttgcctcccgtggatcttgtaacacatagtcaggtacaaattccacaaggtgattggcatagactaagtaatccatatgataagccatgtagaatcgtagagattcaatatggtgaagtatgtgacgaagaagatattgaaagacagaataatgcgtaaactatatt
		gtcggcgccgttgttgatctcggccctggcctcggccagggtcttgccctgctccatcgtcatcagggtggcgacgagctcgatccgctcgcgcagcaggttggccgccttcctcatgatcttcgagcgctcgtaggcgctgacccgcttccaggtggcgaagccccttggcggcggcctcgagcgcctcgtcgaggtcggccttctcggcataggcgagcgtgccgatggtgccgccgctggccggg
		gtgctcgacgccacggcgacgcatgctcggcgtcgaccacgagaagctctctggcctggcgctcagcgcgccggcgggttgcgatggccttgtcatggtgccctacttcgagggcgagcgaacccccaacctgccggacgccaccggcgccctgcacggcatggcgcctgggcaacaccactcccgcgcacctcgcgcgcgctgccttcgagggcgtgttgtg
		taaggtaactggatttaaaactgtagatgttcgattcccaacttcacgtggtctcgacggttccgatgcaatgaataaggaaccagattattcggctgctcttctcatccttgaaacagatgacccttcgctacaaggtcacggctttgtctttacatgcggccgcggaaatgatttgcagtgcgacatgattgcgcagcttgcaccttatgcaattggtcgcgaagttgcagatctcgcaaccag
		ttcgcccgctgcgatagctttggggaaaatatgctttccaaaatcagaagacacgcccatctcgataagccgtagaatagcgggtgacaaaatatacaaagctgcattcaccagatttcgaagatcacggccatcatggggtttcggatagaacgacgtgatcttgctcatatcatcgatctctgcaagatctgaatcatagggatgatcgttcggatgcaggaagagggtagccgcgg
		cggcgctggagggcgaccagcgcctgatgccgctcttcttcccgcgcgcgggcgacaacattctggtctatgcggcgctcgcctcggtgccgcttacctggtggatcatcgagcgcacgcgctttggcctcaggctgcgtgccgtgggcgagatgccgctcgccgtcgacgccgccggcatc
		cgcgtgaatggaatcaaacccagacggtgtggttcgaggctctggaatctttgccaagggctggggcgcatcacgagccaaggtgtacggcgtaaaagaagaagacctgggcaagttctacgctcagcgcaccctgcttaagcgcgaagttgtgccagagaacgtggccaacgctgtaattgccttgaccgctggcgaacttagccacaccacaggcttgcacatacctgtcgatgcaggcgttgca
		gaaatatgccctgcctaaggattacgatattttctcggaagtaatgcaatcgcaccagcgctcgtcaatcggcaacggaaccattgaatattacatg
		cccaccgcgatcggcacgccgatgccggcgacgttaccgcccaggttcatggtgccgcccaggaagccgacccggttgcgccggcccagcagtgagggaatgacccagaacaggccgcaccagcgcaggaagaacagggtcacgcacagcaggatcaccacggtgagcgggtccttgatctgggccacgctgtagatcgcaagcgtggcgaggatcgaagagacaccgaacagagtgcggaacaccttgg
		ctcgcaacgatggagtcatgaattcgaactccggggccgatcgttacgccatccatcaggattgagttacgcacaatcgtgccattaccgataaccacgtcggctccgagcacagagttttcgacgagtgcagaagaatcgatttcatcggagggcagaactgcgatttcattggcccgaatcccgtcgatgagatcgagttgcgcacgcagataggtttcgggcgtacctgcgtctatccaata
		gtgaggttggaggtttgttgaacctcatatagcatcaagccagggcccagggcgtggatggtgcctgcccggataaaaaccgtgtcccctttttgaacctcgtatcaaagtgacgcaggtcatgtccatagatgctgcattaagacacgtccttgaaataaagaaacaatcgttccgacaaagcac
		cgctaaagccacatcatccacaataccgccgcgggcaatattaatcagggttgcagtcggtttcatcatggcgatttctgcagcgccaatcgtgtgatgattttgtgcggtatagggcagcaccaacaccacatgatcagcagtgcggagtaattcttcttttgaaac
		cgccgcccttgaggttgttcgtggcgaccaccgacgtcttctgcttccaggtcggcaggtcgttgtccatcagcacgaccttgacgccgctcttgaccgccttcgtcagggcgggaatgacggccgcgctcgtgggcgtgatggcgatgcccttgacgccggacgcgaccatgttctgaatcgccgcgatctcaccggcgtcgtcggtcgccgacttgccctgcgcgtagacgatcttcacgttcttgtgcgt
		tcaccctgactcgactatggttgtggttgcggcggatcatgtcattcgtaaatcgcaggctttttcaaggcaatccgccaggctgtcgcggcggcccaacaaggatatcttgttacattcgggattaaaacctgaccggcccgatacaggatacggctattttaagattggcaagcgtttgccttcgaatacagcatatgggatttcacagtttgtggagaaacccagtcttggtgtagcacaaaaagttat
	One Carbon Metabolism	cttgtaatcatcggatggccttgaggtgatcacccggtgtgatgtttaaaccggggttggtttagcggaagacgatggtcttgttgccgtgaatcagcacccggccttcgagatggttgcgtaggccacgagccagcaccgtcttttcaatatctttgccgtagcgaaccatgtcttcgacagaatca
		ggattaagaactgcctttgtctcttggtagaggtaagacttatttgcacttccaccgccctttgcgatgaagaggaagttgtactcatcctggtgctcgctatcggcatagatttcaatctgagccggcaggttattgccagtgttcttctc
		tggcaatctgcatcaccgaaggcattccggtgcgcgacatgctgatggtgcgcaacaagatgaaggccaaggaagccgccggcggcaagaagaccctgctgctgggccccaactgccccggcctgatcacgcccgacgagatcaagatcggcatcatgcccggccacatccaccgcaagggccgcatcggcgtggtgtcgcgctccggcaccctgacctatgaagccgtg
		tgtaccacaacttgaagaaagtcatagtcaagaagtacgggatggacgccactaatgtgggggatgagggcggctttgcgcctaacattcaggagaacgatgagggactgaacctgctgatggaggccattgagaaatccggccatttggc
		ggcgccagcgcccactatgtgaccggcgatctcgacgaaggtccgatcatcgaacaggacgtcgagcgcatcagccaccgcgacacgcccgaggacctggtgcgcaaaggtcgcgacatcgagcgccgcgtcctggcgcgcgcccttcgctaccgcctggaggatcgggtgctgctgaacggtcgcaagacggtggtgttcaccgactagacctcttctgttgcacgtacact
		gacgacatccatctgcccggtatttatgtgcaccgcattgtgcacaacgccacccccgaaaagcgcattgaaaagcgcaccatcactgagaaagcaggagtttgatatggcttggacgcaagatcaaatggccgcgcgggcggctcaagagctacaagacggtttctacgtcaatctgggtattggcattcctacgc
		agcatattcagacaagcttcattggcgccgccgtgtgccgggccccatagacaggcaataccggctgccatcgtagcaaacgggttggcgcccgacgaaccggccagacgcaccgtcgaggtcgaagcattctgctcgtgatcggcatgtagcgtgaagatgatgtccagcgcacgcaccagcaccgggttcggcttgtactcttcgcacggggtgccgaacatcatgcgcataaagttgg
		caagctcgaacccgtagctctggttggcgaattacccaggccctcgttcttagcgattcacccaaatcggaagtatatgtacgctgtttcggagttaggaacct
		aggaaatgaacttcccggtctggtccaaggccatcagcagcaagggcacgatcaaggccacgctgggctcggtgaacatccccatcgtctgcgccggcatgctggtgaacccgggcgacgtggtcgtggccgacgacgacggcgtggtctgcgtgcccgccgcgcgtgcagcggaaacgctggcggcggcgatcaagcgcgagagcttcgagggtgagaagcgcgacaagctggcgtcgggcattcg
		caagcgcaccggcttcttgccatcggctgcggtgtagacgcggtccgggttcaggccacggatgatggtcttgctgcctttggccacttcttcggtcaaggtgcctttcagaatgcccagccagttgctgtaggccaacaccttgtcgtccgcgtccacggcggccacggaatcttccaggtccagaatagtcgacagggcggcttccaccaccaggtccgacacacccgccgggtcgctcgcg
		atgtacccagatcaatctttgtatccagttgattcagttccaaagatggttgagcgtatcaataactcattccagcgcgctgacgaaattcaaacagctaaaggcatcaacaaaggtgatgctggctatattgaatatttcgctccaatcgttgctgatgctgaagccggtttcggtggtgtattgaatgcattcgaattaagcaaagcattgatcaagcaaggtg
		atcgacacacttccaatcgacacacttccaatcgacacacttccaatcgacacacttccaatcgacacacttccaatcgacacactcttaatcgacacgctctcaatcgtcaaactctcactcgacaaactctctatcgacaaattctcaatcgacacactctcaatcaacaaactttcaatcgacacacatatcatcaaaacttctggaatcgataaattcacttgatccccg
		ccggaccgcacttctgaggagatggtccgtctgttcgaagactggctccgtcagtatcccatcgtctccatcgaggacggtgtggcggaaagcgattgggacggctggaaaatgctgaccgccgcgctcggttcgcgcgtgcagctcgttggcgac
		ggatcgcgcgtcttcatgcgttccttggccacacgcgacttcggcagcgagatcagcgccgccttgcccgatgtgctggcggccgccaagtgtgccggtttcgacctcatcattgtcgagacctcgggcatcggacagggcgacgcggccatcgtgccgcatgtcgacgtgccgatgtacgtcatgacccccgagttcggcgccgccagccagctggagaagatcgacatg
		cgcatgaaaaagatattttccacatggtcaacgtactgatccagataaatgatattccctttgtttaccgtaataaagtctgttacctccgccagaatgcccggtttatcagggcaatgcaataacagttttgctgttgtcatattcactttcttattattgtctgtcactaatcatcaaattgaggc
		agcagacggttggagacgccgacgcgcttgagcacctcgtcgcagtgcttcttcaggatggccgcgcgcgggtcgtagttcttgtacacccggtgcccgaagcccatgaggcgcgtggtgtcgttcttgtccttggagcggtacaggaacttctccgcgctgccctcttcctgctcgatgcgctcgagcatctcgatcacttcctggttggcgccgccgtgcagcgggccccacagggcgttcacgccgg
		aagccaaactcttagaaatcgttgctgactcaaaagcggatatggtgatcttagcgcgctatatgcaaattctctccgacgatttgtcaaccaagttatctggtcgatgcatcaacgttcatcattcattcctgccaagctttaagggtgcgaagccctatcatcaagcgcatgcccgcggcattaagctcattggcgctacagcgcactttgtcacgagcgacttag
		cccatcgtgacccactgaccattggtgcccagggcccagtcgcgcatgtggtcgatggcagcgttggcagccgaggcagccgacgacacgccgcgggcggcgatgatcgcggcgccgcgcttgccgacggtcggcaggaacacgtcgcggttccacacgtcgtcgttgatcatgtccttgaccgactcgccgccgatggtggcgaaacggtagtcggcgtacatggtcggcgagtggttgcccca
		gattaaacgttgctgattatgtagtcacagaagctggatttggtgctgacttgggtgcagaaaagttcattaatatcaagtgtcgcaaagtggcctagtaccagatgcagtagtattagtggcaacagtacgtgctatcaagtattgggcagctatgaaaacctagacaagcacatacagaatatccaaacttggtaccgattgccctgtg
		ggaagccatgaataccggcttgccctgaacgcggtcgagcacgatgccgaggtaaagttcgcgctcgatgggcagggtttcttcgatgagcaggcgctgcacgacgcggccttcgggaccggtctggtgagtgacgagggtcatccccatgatcttgcgcgccagttcggacgcttcgacggcatcgtgggccaccttgacgccaccgcccttaccgcgcccgccgg
		cgcgcctgctcggcattgtccacgccgagaccagcacgggggcgcatcagccgctcgacgggctggcggccatcgctcaagcccacggcgccctgctcgtggtcgacgccgtcaccagcctcggcgggcacgaggtccgcgtcgatgactggggcatcgatgccatctacagcggcacgcagaaatgcctcagctgccccccgggactcgccccgtcagctttgggccgcgggcgctcgcccgg
		cctaaccgatatgagcgccattgttgacatcatcgcccgtgaaattctggactcccgtggcaatccgaccgtagaagccgatgtgctgctggaatccggcgtgatgggtcgtgctgctgtgccgtcgggtgcatcgaccggtacacgcgaagcgattgaactgcgtgatggcgatagcagccgttatc
		cagaagcgttccggattttattgtccgatcccaaagtcaaagcggtattggtgaatattttcggcggaatcatgaagtgtgatgtgatcgccaccgccattgtgaccgccgccaaagaagtttcctttaatgtgcccttggtggttcgcctggaagggaccaacgtggaaaagggacgggatattttgaatgcgtcggggatcgccctgacggccgttaaagatttaaccgaagcagcc
		tgttgcaacacaagctccgcatccaatacaagctgctgcttcgaacgctttgtcagcatcagatttgttgataggaatggtgttcgcatcaatcgtatttcctgaagtgttcacagaaacgaatcctccagcttgctgaatacgatcaaatgcacttctgtcaacaacaagatctttgatcacagggaatgctttcgctctccaaggctcgatgtaaatagtgtca
		agcgatacaggcaaacggattggcacccgaagaaccagccagacggacagtcgaggtggaagcattctgttcatgatcggcgtgcagcgtgaaaatggtgtccagtgcattgaccagcaccggattcggcacatatttctcgcacggattaccaaaacatcatgcgcatgaagttggcggtatagtccagatcgttgtccggatacatgaacggcaggccggtgttgtacttgtaggcca
		ctggtcgagacggtgggcgtgggtcaggcggaagtggacatcgccgggctcgctgacacgaccgtcgtactgctcgctcctgggatgggcgacggcatccaggccgcgaaggccggcatcctggagatcgcggacgtcttcgtcgtcaacaaggccgaccgggagggcgcggagcagacccgtcgcgacctcaagcacatgctgcagctgggccccagcgaca
		ggacgtcggtggcggtgctacgaccgagaaggtgactgaagccttcaagatcatgctcaagaacactaaggtcaagggcattctggttaacatcttcggcggcatcatgaagtgtgacaccattgcaaccggcgttgtggctgctgcgaaagaagtgaacctatcggtaccgctggttgtccgtatgaagggcaccaacgaagatctgggcaagcaaatcctcaaggattcaggcct
		ctcgggcgaggaggtcaagccgctgtacaccgaggcggacatcaccgactcgcagatcgggttgccgggtcagtatccgttcacgcgtggcgtgtatccgtcgatgtaccgggggcggttgtggacgtttcgccagttcgccgggtttgggacggcggaggagaccaacgagcgctttcgctatctgctcgaccacggccagaccgggttgagcacggcgtttgaca
		cgcgctggtgctccaacgccgaccacgagctcaacgcttcgacgttcgccgcgcgcgtcacggcggcgacgctctccgacatgcactccgcgatcacgtccgcgatcggaacgttgaaggggcctctgcatggaggcgccaacgagggcgtcctgaagatgctccgcgagatcggctcgctcgatcgtgtggacgaggagatccgcgcccggctcgcccggaaggaaaaaatcatgggcttcgggcaccggg
		tgcgggatcactccgccgcagatgacgactatttccgatgcgtcgagcttcttcagcgccttgatgagttccggcaccagcgtcgtgtgaccggccgcctggctcgagacaccgatgacgtgcacgtcgttctccaccgcttgccgcgccgcttcctggggcgtctggaagaggggtcctatgtcgacgtcgaagccgagatcggcaaatgcggtcgcgatgaccttcgcgccgcgatcgtggccg
		gcaacagaatggctgctaaagaagctaaaggcggtaaaaaaactttgttgttagggccaaactgcccaggcttgatcactcctgaagaaatcaagattggcatcatgccaggtcatattcaccgcaaaggtcgcattggtgttgtgagccgctcaggtactttgacttatgaagct
		cgtcatcccaaagccgggccgaggcgtaatacggatgcccctgcgtttcgtactgctcccgaatcggcgccttgaaggccgcttcttcctcggctgtccaggtacttgccagccgcttccatgccatcccgtttgactgtcgccagcacgccggctgcctggtcgccgcccatcaccgaatccgcgcattcggccacatccacagaaagcgtggcgaataggcgcggccgcacatgccgtagttgccggcgcc
		ctggcgaagccgaggtgatggcagatgccggcatcaccgacatgctgctcaccttcaacgttgtcggccaacacaagctggagcgcctcgccgaacttgcaaagcgcaccgccatcaaggtggtggcggacaatgcctcagtgctggaaggcttgtcacatgcggcagcgcttgcgggacgtgacatcgaggtgctggtcgagtgcgacacgggtncggcgcga
		agcgggttactggtgccgtacttatggactttaactcaggcgagttaattcagatgaaggctagggctgtattactcgcaacgggaggggctgcgcccttatataaattttacaccaggcttcgtttaggaaaaaaggtggcgacgggatagcgatgggctttagggctggcgcagaaatgatcgatatggaaatgatgcagtttcatccaacaggattaattgct
		catcggccgtttctttgatgatttctttaatgcttaatttataaaatgatgacatgtgatttattttttacaaaaataaaaaaaagaaacccgaaggttctcaatttattccataaacaacgcttttaattccgttgcttcgcttggtttcatttttccagctaagactaagcttagttgttttcttcttaatgctgcggcaaatcgttctttttctaaatccgtttcaggcacaattggtggaactggaattggtcttcccgtttcatcaaccgccacgaaagtataaatagcttcgtttgt
		cctcctgcaccaacacctccaatccggccgtgatgttgggtgctggtctgctcgcctgcaaagcggcagcgcgcggactgaaacctgcgccatgggtgaaaacctcgctcggcccgggttcgctggtggttaccgactacctgaagaaagccgatgtgctgaaagacctcgaagccatgggctttttcgtggtcggctacggctgcaccacctgcatcggcaactccggtccgctgccgcaggaagtcagcg
		ggaatagatttcccaattgctcaactggggtggaggcatagaaataggcgggcagatctgggtgatcgattagcgagcgatattgcgcaaatgaattatcgctaattgattgcatgcaggaattccagagttcaagatctgcaggtgcttggcgaggaccgcgatttaaaacagtcgcctcaagtgcggcagctaaagttaattccacattttcacgagcaagtgatggcaatgcg
		cgcaaggatggcaactcttggcatcacatcggtgaagcgcaactctgcagacatcgagaacgcctcggagaccggactgaatgcagacaggatttcgtttctgctgatggtcattccctcgagttcgaactcgacacgctggaagaacaccttctcgacatcgtcggtgtgctgctcggcatggacgatattgccgccgtgagaggagatgaagccggc
		ccttcgtcgcagacttccttggcggcgcgcgaggcgatgtcgcgcggggcgaggttgccgtagctcgggtacttgcgctcgaggaagtagtcgcggg
		tgatgagggttatatcgattactacgcccccatcgtggcagacgcagaggctggctttggcggcgtgctcaatgcctttgagctcatgaagtcgatgattgatgctggggcaagtggcgtgcactttgaggaccagctggcatccgtgaaaaatgcggtcacatgggtggcaaggtgttggtgcccacgcgtgaagccgtcagcaagttgtccgccgcccgtctggcagcag
		gcgcgatgtggagcagaagtggtggcggttcgcgaggaatgggggccggaccgatcgatccacaacggctgctcgatgcgcatccgtcgcccaaagtcatcgcacttgtccatgccgagacgtcgaccggcgtgcgcaacgacgttgagccgatcggcgtacgcaagggcgacgcgctcctcttgctcgactgcgtcacgtcgctcggcggcatccctgtcgacatcgacggctgggacgtgg
		ctgctcgatggccttcgccatgccgcccagtgcttcgacctcattaatcattgtgagtgcttcttgggccaaagtctcggtcaggttttccatgaagtaggacccgccccaagggtcgaccgctttcgtgatgtttgactcttcttgaatgatgagctgggtgttgcgggcgacgcgggcgc
		acgttggtcccctcgagccgcaccaccagcggcacgtcgagctcgacttccttggccgcggcgacaatgccctcggcgatcgtgtcgcagcgcatgataccgccgaagatgttgaccaggatgcccttcaccgccgggtccgacaggatgatcttgaacgccgcggtcaccttctccttgttggcgccgccgccgacgtcgcagaagttggccgggaaggcgccgttgagcttgatgatgtccatcgtcg
		aataataaattttagagcttgatatttcacattaccaattgctaatgcgccaataacccactgcgccactgattgagccagcaatgggtgttccggtcactcatcgcatcaattcccgcaattccagctggtggaacagcattgacatctgcggcaacttttaaatgtggcgcacttgcaatcaattccgcacttaataattcaatacccgccgcgcctgttgcaaaaacaatgtcagtccg
		aggggggtggttcggagaataagactaagttttacgccttgaacccatcagactccatcgtcgactgggtactaaaaaccgtgcccactatgggtgctggctggtgcccacccggcattctcggcatcggcatcggcggcaccccggaaaaagccatgctcctggccaaagaatcgctaatgtccccat
		ggatcatcctcgccggtcgagggggaccttgtcctcgctgaaggcggtgacgtattccatgcccagcacgcgctggtaccactcgaccgtcttcttcgcgtcgcggcagcgataggcgacgtggtggatgcgcttcaggctgggcggccccgcctcattg
		gaactgctcgtactgctccataccgtagagggtaacctcggtggcgatgtcgttgacgagttcctgggttggcttgaccttgtccttgccggacgggttcttccagtcaaccttgcacttgttcttgatgtagtccataccgtagtaggtgaagtcatcaaggatgttgtcggtgtatgcagcggttgcatactgggttgaattcccggacacccaccggg
		ggtgggctgtcgcgtgcgacgttcgattccgtgcgcgtgctggatgccgcgggcttcgatttggtccttgtggagacagtgggtgttggccaagacgaaatcgacgtcgcgcgtttggcccacacgacgttggtcgtgcttgtgcccggcctcggggacgacgtgc
		cgatcgaagacggcttggccgaagacgattgggatgggtggaaaaaactcactgcagagcttggcgactcaatcc
	Organic Acids	ggagcgctttgagaaagccactaaatcaggatttcaggcagttgaatttctctttccttatgcatactcggcaaatgatattcgccaacagctagataaaaatcatcttcgtttggttcttcataatttaccggcaggagactgggatgcgggggagcgtggtattgcttgtttgccggatcgtgtagaggaattccgggcgagcgttacaaaggc
		gtgaagagtggcgtcatgccaaattccgtgatatttgcaagaaactgggacccttgttcgctctacaaagagctggtaagtctgcaaatctgtgatggcttctgggaaaaccatctcagcacctgcagcaacgtaggcttcaattcgttcaagagctgattcaacgccttcatttgcaagtgcatcggtgcgagccatcacaacaaagttgtcatccgtgcgagcatc
		catggccttttcaggtaatagcgagggaaacagccctttgaaagggaatatacaccactctgtaagccagtggtgttatggagatattccgcttgatcagtttgccaaatcatgcaaagaaatgggtcttgaatcaattgaactcctgggcgaaaaagactggcctgtggttcagaaagctggtcttaaatgtgctgtgggttatgcaac
		gtctttgtacagaactttgcccgcgccatatcatcggtcacgaactgcctcctcatctcattgtgcgagcaattaactatagtgatatagcatcaccttctgtactttatcggcattaacttgttcagaatgtaatattgtgaagcttgggcttgtcctgttgatatctcacccatgcgactgaatcggctattaaaagctaaatttcgcgccgaaggtagccattatcaagggg
		gaaatcaagctcaatgaatttttagaagaacatcatatcgaaagtattgaaacagatttgggcgaatatattcaacaactagatggggagcccccatatcatattgttacgccggctatgcacaaaagcaaagaggatgtcgcaaaattattttacgagaaattacataccgccccaaaccttaccccc
		atcctgaaaaactacaaacctcaggtggtgctggctgccgcaggtatcttcctgatgatgtgcggtgtctggttagggttcggtggtgtactcgatcccaccaaaagcagcggctacttgatcgtcgatatttataatgaaatcctgcgcatgctgtccaaccgcattgccggattggggctgtcgattatggcggtgggcggttatgcccgctacatggagcgcataggggccagtcgcgcga
		cgcgcgtcgccaccgtcgcacggcgggtgctcgaactcagcgaattcctcgtcgacgtgctcggcgtgaccgatgtcggcgcgcgtttcccgcacacggtcgccttccatccgacctgccattcgacccgtctcctggggtgcgcgaccgtccgacccgcctcctcgacgccgt
		caatcacaatgtgcatttcttgacccaatcttggtttttgaaaatgactcgaaaaagtggtaatcggttgacctgtggc
		atcggccagcaccacccgtgccgccagcgccgcgggcgagagttcctcatccgacaggctggccagcaggttgcggcggccg
		cacgtgcgaccatgatgccgtctgaggcttcgagaatttcttcgagattttcaatagcctcggtgcgctcgattttggcgatgatgagtgacttcccaccagcctttttcatgaggtcgcgagacagatgaatgtcagccgcttcacgtgggaaggagatgg
		tcccttgacttacatggctagacattaattagcgcttttcgataggaacaaaggcaagatcttctggaccaacataagtagctgttgggcggatgatctttccatcgttgcgctgctcgataacgtgagctgtccatcctgaaatacgagccattacgaacaatggagtgaagtagttaactggaatcttcatcgcatcatatgcaaccgctgngaaccagtcgacgttagggaacatcttcttt
		cttgaggcttaagcgcactgaatttctctttcaattccgcccatcgctcatcactaacccggtagcccgttcccggacccatgtaatcgttctgattattgattgcactcattaccttgaaattctcatccaaaacggaagaagtatggagatagtcaccgatgacacgctgcttcagcatgttcatgactctttcggcaatatcttcgaatccgttatcatgcaagccctttacaatatcg
		ccgagttgatggagatcatgcggtcgttctgcgcgatgaccgctgggtcattgacgaaatccgaggggagcatttccaagtcaggttgctcgtgggtccatcgatagagagcttcgcttcccatcacgaacgagctcacgatcttgccggggcgaagtgtcttgcgagctccggtgatgacgccttcgtcgaccaaccgcatgactccgtcggagaacatttcggtgtgtattccaaggt
		gcgcgcgccctgcgcgccaccgcgaccggcaacttgccttccagggacgagacatccaggcggccctcgcccgtgaccactgcttcgcagccgcgacaggcagcctcgaaatcgagcacgtcaaggatcctctcggcgccatccaccagctgggcgcccagcgacgccagtttcgctcctaaaccgccggccgctccggttctgggaccgcgcgggaggccgagcgaggacagccgttgggtgagcacggcg
		tcaaacagctttgcttggtctggggcgtttttccggtcccgacgagcggttttaagagcaccgatgcgatggtccgcatgctgcaacagaaagcgctcgaatctggcctggtcaaacgcggcgacttagtcgcgatcaccgccggcctgccgttgcatcaggccggcacgaccaacatgatcaccgtcaaggtgatcgagtaagcgaaacgctgcgccctcgtcacgacgcccccgctatcgctgtttt
		ctaggttcaggcttagtggtcctttgcagctgctatggggtgatgccactcgatatgcctgaatcagtacttgttcgctttaaaggtgagatgcaaccaggtattacgctacgtgatcttgtgaatgccattccttatgtggcgattggggctggtgaactgaccaccgataagaagggtaagaagaatgtctttaacggccgtgtactcgagattgaaggcttacctgatcttaaagt
		tcttcgtccgacggccagatgtccttcaggcggatctccttgccgtccaccaccgtcagcacgtcgttttcaatgtcgaagcgcacggtgccggcaatggcgtaggccaccaccagcgggggcgaagccaggaaggcttgcttggcgtaggggtggatgcggccgtcgaagttgcggttgcccgacagcacggcggtggcgtacagatcgcggtcaacgatttccttctggatggcggggtcgagt
		cttacaagatgctcgggtgggtcgtctgcccttctgtatccgcattctcctggagaacgtcctgcggaactgtgacggcttcgaagtgaagcaggcagatgtagagcacgtgctaaattgggaagtgaccagtcacgaagacgttgaagtgccgtttaagcctgctcgtgtgatgttccca
		agctgcggcggcgctggacgcgcggcacgacaaaaacacgctgatcctggcccgcaccgacgccgtggccgtcgagggcctggacgctgcgctggagcgggccgagcgttacctggaatgtggggtggatgcgctgttcatcgaagcgctgcgatcggacgagcagatgaaccgcgcctgcagccagtttgcccagcgcgtgcccctgttggccaacatggtcgagggcggcaagacgccgg
		gtaggactcgatcaggtagccgttggcgctgttgcgtacggccgcctcgtgaaagtcggcgtcggcctgcgcgtaggccacttggtcgccgctggcgtgggccgcggtcatggtctgcacggcccgttgcatctgcgccagcgtctcgtcgcgccgccgcgcatgggccaggcgcatcgccgccacctccaacaggcggcggaactcgcacagctcggccacgtcttcctcggtggg
		ttgaccgcccactttgtgcaacgccccgatttctttgacgtggtggttgccagcaatttgtttggcgacatcttgagcgacttaggccccgcttgcactggcaccattggtattgcgcccagcgccaatttgaatcccgatcgcaagttcccttccttgtttgaacctgttcatggttctgccccagacatcgcgggcaaaggcatcgcgaatccaattggtcaaatctggtgtggcgccatgatg
		ggatgtcaaggcgatgaatgcaggtgccatctccgaccgcaagggcgtcaacgtccccggggccattttgcccctgtcggccatgaccgagaaagaccgtgctgacctcgagtttgggctttcacttggcattgattttgttgcgctttcgtttgtccagcggcctgaggatattcacgagatcaagtcgattgtgggcaaccgggcatggattgtcgccaagctggaaaagccctctgcgatagatttt
		tcgaagcgatgaagatggaaaacatcctacaaggccgatcaggactgcaaggtcaagaaatttccgctgccgccggcgagagcctgaccgtggatcagatcatcatcgaattcgagtgatgtgagcgcttctgcacacggtcgcctgttttcgacggtcgaccagtgctgccaaggcctgtctccggac
		ggaccccaaaattacagcaagagatcatcgaccgcgacctctacgcgaccgctgtgctgtctggcaaccgcaacttcgatggccgtatccatccctacgcgaagcaagcttttctggcttcccctccgctggtcgtggcctatgcgattgccggcaccattcgttttgacattgaaaaagatgttcttgggatcgaccagcagggcaagcctgtcacgctcaaggacatctggccaacggacgccgagatcg
		atcagcgccggcagcgggatattgaccgggcagacgctgccgcactggttgcagccggtcgaggcgtgcggcagatcgagcgcgttctcgatgccggtgtacaacggcgtcagcaccgaacccatcggccccggatagacccagccgtaggcgtggccgccgagcgagaaatagaccgggcaatggttcatgcaggcgccgcagcggatgcagcgcagcatatcggcgaaatcgga
		gatcgtagtgtcccagcgccgacgtcagcgtccggagctggtccatcccgttcccggcgggcagcgcccgcaagagccgaagaaccggctcgggaatctctcgggacgcgatcagcgcggactgcagatcgccgagctccgcgcgcgtcggcagccggcggtgccacagcaggtagcagacttcttcgaacgtcgcgtggcgcgcgagatcgtggatgtcgtatccgcaat
		gggaaattgcttttaatctggaagaagccgagcctgtagaaaagatggatatttatcccacaaatgctgaatcaccttcggtttttgcattatacgtcaggaactacaggacaacctaaaggggtgaaacatgttcatagttccttgatatctcaatatttgacaactaaa
		atcttcaataggtagctccacaccaaggtcaccacgagcaaccatgatgccatcgaaagcagcaacaattccttcgagattagcaaccgcttgtggcttttcaatcttggcaataactggaactcgtataccttcttcatccataatgcggtgcacatctttaatatcatctgcgctacgaacaaatgagagcgctatgaaatctgcgccggcctttaatccccatcgcagat
		agtcgattagccatggactgtcaatctggaccgcgcaccatctcaaggtcaaggcgattgccgcgctgacgcaaactggctcaacggca
		atcgctggtattactgaagaatcgacgcctgcaattacttttgattgccttcgcttttggcgccttctttgagggcgctgcaggttttggtacgccagtagcggtaacagcggctattttgattggcctaggcttctcacctcttgccgcatctggtctttctttaattgccaatactgcgccggtagcctttggtgcgctcggtaccccaattattactttagctaaagtgcatgactacgatttaatggaaa
		cattgctccttcacccaggcgatgtcgggccacgagagacgcgggtcgaactgctcgttggtccaggcggcgagcgagctcatgtcgctcacgcccttcacatgccccaccaggttgcggaaggtatggcggcgcgtgccggccatgccgaggcaccagcgcggcttggtcatcaggttgacgatgttgcgcagcgtcggcttcggcggcgcggtcaggccgttcttcaggtccttgtggcg
		ccggcatcgagaacgccctcgacctgccgcatgcctccaccggctgcaaccagtgcggcgccgtgtgcccggtcaatattcccttgccgcggctgatgcaccggctgcgcgaggtgcaggcggaacgcggcctgcgcccgtggcgcgaacgcctggcgctgcgcgcctggggctgggtcgccgcccgcccggcgctctaccgctggttcacccgccgtgccgcgcgctacctgcgctggctggccg
		gatgacaaatcgtagctctttggatgcacagcttgatcattactagatgctttgatcaatgaacgaattgctgttggtgctgtgtagaaaatggttgctttgtgtttttggatcatgtcccagaaacggccagcatttggatatgtaggaac
		ggatgcagttatcgagaatcacatgaaattgatcgaggtaccaccactcccttctgagcctgaagatgaaatcatcgcccagtatgtgtcggaactcgttcccgatgaagccacaatccaacttggtatcggtgccctacccgctctgataggtaaatatctcgataaaaagcatgatctcggcgtccactcggaattgatcgtggacagtatgctcgatctttatgaaaagggagttataaccgg
		ggtaaacagcatcgccgtgcggccgcgcagcgagcgcatcacgtcggtcagcacatcattgccggcagccgttgccagcaactcgtggaagcgcgtgttgagttccgacagcaagttggcgtcattgccctgggccgccttgatgccctcttcaagcacctgtttcaggtcggccatcgacttttcggtacggcgctgtgcggccagcttggcgttgagcccctccagcgtcgcgcgt

## Sheet: Metabolism of Aromatic Compound
Subsystem Hierarchy 1	Subsystem Hierarchy 2	Sequences
Metabolism of Aromatic Compounds	Anaerobic Degradation of Aromatic Compounds	tgcgaacaaccttgagtcggtgctgacgtacgagggcacgagcgaggtgcaccagttggtgctgggcaaggcggtcaccggcctcgacgcgttcggataggaggcccgggtccggatgtcgccgttccgcgcctcgtcgccgttcaccgacgattggaagca
		cctccggcatgcgtgcggccagcttgtcctggcagtaggctgccgcggcgtcgcgcaccatgcgctcgtcatcggtcagttgctggtcgagcagaaaggggtcgttccattggaaggtggctttggccatgaaggttctcctgaaagttgcgccatggtacgggctcgcgacagggccggcaaacgagaatttgtcactcagacatgcaatttccacatatcttgcagcatgt
	Metabolism of Aromatic Compounds	catgcgccagcgcgatctcagcgtctggccgcggtacgatgcggccgtcctgggcttccgcaactactggtatccggtcacctggtcgcgccagattggcgcgaaggcttacccgttccggctgctgggcgagccgctgatgttctaccgcgagcagggcaaggtccacgctctctacgaccagtgcccccatcgcggcatcccgctctc
		aggaagacgaccagctcaagcccgacgtcggtgtgcagttggcacaaaagctgattgaaaaagacaaggtcaacctcatcaccggcgtgactttctccaatgtgatgatggcgggtgcacaagcccattaccagtgccaatgtggtgttggtgggctctaacgcaggccccacaccgatcaccggcaagggctgcagcccgatgtacttctccacttcctggaacacgattcgttgcatg
		tgcggttgtcctcgccggcctggttgacgcagccgtagaccacatcggtcagcgcagcccagtccacctgcgggttgcgtgccatcagcgccgcaatcgggaccgcgccgaggtcgtcggtgcgcacgccggagagcacgccgccgtaacgaccgaagggggtgcggatggcatcgcag
		agcggcaatgagcaagcggcctggcacttcgcggcgctcgccgttgcgcgcctccaccagcgccgtcacgccctgcgcgtcgttgcggtagccggtgacgcggcaacccagttgcaccacatccggccccaggcggcgctgcacttcagccagcagcagcatctgcagcttgccgcggtgcaccgcgtactgcggccactggtagccggccagcagg
		gcggtcgcgccggcagggaatgggaatgcgtgtgagctcgatgcccgtcatgctggtgcggaacacgacgtcgttcgggtagtcctcgggcaggccggcggcgcgcagcttgtgcgccacgcccaggcggcggaactgctccatggtgcgcgaagacacgtggttgcatttcaccggcggtggctcggcgtagcggcgctgctcgatcaccgtcaccgggatgccgcgccccgacaggtcgatgg
		gccccgctggtgtccgatggatcccgccggcgtcgtgcgctacgtcgatatggtgacccggatcaccgccgcgcatggcgtcgaaccgactgatcaccctgacctccctgtcggaacgctgcttcgacagcaccgtgccgctgctcttcgatcgcaacgacccggcggccgcagcgcgcaccgtcacctgccaccagctcttgcgtgaccagggctgcgagcatggctgggtcccctacgcgttg
		cgtgcctcaactccgttatttgtaacaatggtggttactaaacttcctttcccgagtttgcttaaggcaatcgcttcggttattccttcgtagggcatcaaggtacttacggggccgaaggcttctatttcgtgaggcgctgcatcttgaaaagggcgttcgttcaatagcaataggggagaaagaaaagctccttttttgcatctgcatccagaacc
		gaatgcctccatttggcaaaacgaatctaatgtccaaacttcgtaagtaagtttgcaatcctgcgtcttgcatgggcaataaatgcgcatcactagtagattcattatagtgtgcgtgccagtgaccaggaggcgttatgaagactgaatagggtttccagtcaattcgagttggattaatgatgtcgccttgtgcagaaattcgtgtgccaactagcgtatagcaaccagcttcacaat
		gaggccagcaggaagcccaggccttcgagtgcgcgcagtgcaaacaggctcgccgcgtcacgcgcccaggcgccggccaggcttgccatcccgagcaccagcaacccgcacaccatgctgcggcgcaggccgacacggtcggctgccagcccggcaaccagccccagcgacatgccggccagttgcaccagcgacagcaggaaaccggcttgcaccagcgtcaggtccagcg
		cgggagttcgaggaaggcagcgacagctgccaccgggcacgggccaaggtcggactgccgccgctgcttgccgcctgaggcgcccgccggtgctcaggtgccctggtagagccacggcacgtccagcagccgctcgcccagcagcttgagagacgcgtcgcgcgcccaggccatggggccatcgagatggaagatctcgccgttacggatggcgcgcgcctgcacgcgggcattgcg
	Metabolism of Central Aromatic Intermediates	gatcggagctttgcaccaggacagacgtaaggaccgaggactctcctccatgaaaatccaaaaaatcgaaaccttcacttcgcgtcacgacctctgcatcgtccgcgtgacctccgacgacggcacccaagggtacggacaaaccgcccctttcaatgccgacatcaccgcaaccgttctcc
		cagcaggcacgcgacccacgcccatcacatcgagttccgatcgcacggcggcggcgacgagccggagaatctcgtcgccctgtgcgcgtttcaccatctccgctgcgtccacggcggctggctgcgcgtcaccggccgcgcgccggacgcgctcacctggatcctccgcggcagggtctggacggggccgc
		atgcgccacgatgcgaatttaagaagttgcgttgcgataatcggtcccagaccgaagccgaacagggcgaatccgctttgctgcaggccctgtaggaatccgcgccgcgaaggatacgcagctgcggccgtcgctgcgaaactcgtgggacagtaagatccctccatcaatcccatcagccctcgaatgaccatgagacttgtaagccccgcgaccattccggagaaacccgacatcagcgagaagcag
		tagcgcacgagttacaataaaattgcttcctaattctgaattacactggatagataagtgcggtcatgccccaatgatggaagtaccagccgaaattacaatgttattttgggtgattttttgagcaggaataaattgagttcataactttccttttaatttttagtattaagccagagcaagtggaagtaaagtagggtcaaccaatttataactttcactttttcatttgattaa
		cgaaaggccagaccgcaggcggagggcccgtgctcggccgctaagtacgccgccaggctgcgcggctcgcggttgacgatgaagttgatgtcgccctggcggtacagcagcacatccttggaacggtggcgcgcgaccaggctgaaccccattttttcaaacagggactccagcacatggggtgtgggcgaagcgaactcgacgaattcgaaccccatgaggcccatggggttctcgaacagatcagac
		aacagccccctgggcctccacaactggcaatggctcttcctcaccgaaggcctcccttccgtcctcctgggcctggtcaccttattcttcctcacggatactcccaagcaggcccgctggctttctaacgccgaacgcgacaccctgaccaccctcctcgcccgcgaacaattggatcaccccgcccacgaccgcacc
		caacacgtgtgatcgcttaggtggtcgttcgcagattccgtgttcgcgtatccgccatgaagccataaacaaccagcgagatggcgatgcatcccgacacgtaccagaaataaacactttcgcgcccggcggtcttgagcgacagcgccacgtactcagacgtgccgccgaagatcgcaacggtcagggcatagggcagtgcgacgcccagcgcccggatctcggtgggaaacaattccgctttcacggcgg
		cgcagacgcctgacagctttggcagcatgctggagctgtgttggaagggtaccaagcccatcacactgccagaaggcggtggcgagcgtcgcttcctcaaggtcagtgcctatggcgggcatttgtctcacatcattccgcgaaccttgcaacggtgatgttttctgtgctgtggtcattgtac
		tccgcgtgctcaacgtcaacctgatcggcacgttcaacatgatccgcctggccgccgatgcgatggccaaggcagtgcccaacgcctccggcgagcgcggcgtgatcgtcaacaccgcctcggtggcggcgttcgatggccagatcggccaagccgcctattcggcgtcgaagggcggggtagtggggatgacgctgccgatcgcgcgcgacctgtcgcgcaa
		caccggatcgccatgttcgtcgaggatacggcccgacagccaggcgatctcgccgaccgccggggtgacgccgttgttcacgatgatgaggtcgttgtcggtatcgagcggcagcttgtcgggatagaacggaccctccgtctgcttcggcgtgcgcgtcagcgcttcagcgaacgcgcccggcaccgcgaacatcgccgcccccaaggccacctgacggagaaaatcacgccgagcacggagatcagctgg
		agataaatggcgaagcggaccgggaccgcgtcgctgctgtccgttcgggcgcgccaaaagcggatatcattgtcgatgccaatgaaagctggggcgcgattgatatcgtggccgaggcggaagccctaaaaaatctgggtgtcgcgctgatcgaacaaccgcttccggccgggaatgatccggcgcttgcccacatcagcgcgccgctgcccatttttgccgatgaaagctgccatgttgcggcggacgttg
		cggcgacgaagcgctcgaagatcggtcgctccacatagagccgctcggtgcccaggcagacctggccggtgttcatgaaggtggaacggaagatgccctccagcgccgcgcccatgtcgcagtcggcgaacacgatcccggcgttcttgccgccgagctcgaaggagacgtcgcggatgccgtcggccgccgccttcatgatggccgccccggtgcgggt
		agtgcccacgcgcggccacgctccgcctcgggcacggacgcatgcgtgaacgagtgcgtttcgtggatgccccggcggatccaccaaacgacgaccgcgagcaccgcacccacgacgaaaggaatgcgccagccccagtcgtacaactgctgctcggacagcacctgctgcaacagcacttgcagcaacacgcgcggccagttgcccgcccgtcaacgtgacgtagagaaagcccgaccagaagccgcg
		tagctatctgcataggggttgacaagcatcaaatggcgctaaatcgctggtggcggtctcggcctatggcgttggtaatagtgcaatggtttgcattgtcgataatttgcgtgcttgttgcatcaagccttcagtctcagcggttcttgaaagtcggtttgcgcttctcggcgaaagccgccatgccttccttctggtcttcgagcgcgaaagcagaatggaagacgcga
		gaattgcatcataatatgcttgaggaggtgtgcttaaaaaactcaattcctcttgcgcgcatttcagcaactgtagttaaaatatcgtctgttgcaactgcaatgtgttgaacacctggtccttacataaaaatctaaatattcttcaatttgagattttttctttccttctgctggctcgttgatagggaatttaattcttccattacca
		cggggtcaacatcaaccgggcgcgtgatcgcgcaggccgccgccaacaatctgattcctgccacactggaactcggtggcaagtcgcccaatgtgttcttcgccgacatcatggacaaggacgacggcttcctcgacaaggcgatcgaaggcttggtgctgtttgccttcaatcagggcgaagtgtgcacctgcccgagccgcgcgctgattcaggaatcgatctacgacaagttc
		gcagtagggccttccacggcaggtcgggatccgcggccagccgaccctgtacgtcgatctcgtccgcggcggcgtcgcccgagtgaccgccggccatctccttgaggtcggcgccggagcagaagttgccgccggcgccggtcagcacgagggcacggatgtcagggtcggtgtcggcctcgacgcacgc
		ggctcagagcacattggcaaacgagtgatgcgtgcagctgccgatcacttaacccctatcacgcttgagttgggtggtaagtcgccagccattatcgatacctctgccaaattgaaagatgctgcagcaagcatcatttacggcaaactcatcaatagcggccaaacctgcattgcccctgactatgttctgatcaacgaagcagattgcaatacgtttgttgaggaaa
		gtcgtagacgagcgcgctacaccaagccactttcggataatccggatgttgcgtggagccggcggccagctgaatcagctcctcgtactctgg
		taaattattgattgataagattttacttgatttcagcacaagaaacggtctgctgagtggcaactccgttttcgtatttgtaaaatccaatgccagtctgaagtcccagatgattcgccctaaccagccttttaatgatgggagagggtttgaatcgtagttctccaaattcttcgtataaattgttcatccagcgcaacaa
		tgcctggactgcaaggaaccgttcgactacttcaaaccctactgaacacgatgtcgacaccccacttccacaaactgttcgtcaggcgcatcacgccgcaggccgccggtgcggtggccgtcacgctggccatcccgcccgagttgcgcgacacctacaccttccagcccggccagttcctcacgctgcgcgcgcagatcaacggcgaggcggtgcggcgcagctactcgatctgcagcagc
		cgctttacggcgaacgcgttggtgccctgtctatcgttaccgaatcggccgatgaatcagcgcgtgtgatgtcgcaactgaagcgcgttatccgcacgaactattcgaacccaccaacccatggtgcagcagtggttgcagccgtacttaccagccctgaactgcgtgtgatgtgggaacacgagctggctgaaatgcgtgatcgcatccgcgccatgcgggtcgctctggtcgat
		ccgagcaagcccatgctctcggtattgtgctggaggttctgccgcaaggacgcgtgatggagcgtgcgcgacaaatggcgcgttgttttgctctcgccgcacctgctgccttggcaatgaccaagcgtgcgatgaacgcctctctgaatagctctctggatgtcatgatggacatcgaggcagatgctcaggcggttgcccgaaccagtcaatggc
		gtatcaccccctcccaacgtgttccgggacatgcagggaccgatcgacgcattgattcactgcgccggctcacaggcgccggtcggcccgatcgaggggtttcccgacgaagctacgtgggtgcaggcgattcagacgaacctcatcgggacgtatcggatcgtcaaggccgcactgccggtcctcaagcggtcggaggacgcccggattctgctgatgagcggcggcggcgcgttcggccgcggccg
		cggcgatgcgcttcgcgaccacaccctgctggatcgcgtaggcgtccgctgggtccaggcccgggtgctccgcggacaactgcccgatgggggtacgggtgcgctccgcgtccagcagtcgctgcgcgatcgcggcgatcgtcgcctggtccagcgccatgggttcctccgtgctcagcct
		aaagactttgcgggagtagcgacctccccgataacggtctgcgagtagctggaaaagcggcaatccggcgatctttgccacagcatcccacaccgccatatccaacacccctacagccaccgatctttcgccgtgtcctccaggcttctcattccgca
		gaacgacatgctcaacggcgaagtgatccgcctggacggcgccatccgcctggcaccg
	Peripheral Pathways for Catabolism of Aromatic Compounds	aaacttaaagataaagtcgctatcgtcaccggtgccgcgagtggttttggcgcggaaattgcccgcctctatgcacgcgaaggcgccaaggtggtgatcgctgacctgaacgaatcaggcgcgcagaaagtggcgggggaaatcggtgcggctgctgttgcgctgaaatgcgatgtcagcaagcgtgctgatatcgatcaggtggtgaatacggccctggaaaagttcggcaaaatcgacattgtcgt
		atattgcggtgtcaacctatattttgattcatggagcaagtcacggtggttggtgttggaataaaatcaagtcaaaattggaaaattttggtcataaagttattgcaccagatttaccaggtcattcacaaattaaacatgacaatagagaaataactttagatagttatatttcatttgtcacggatattattgaaaaacaaactgaaaaagttatccttgtcggtc
		cagcgacgcgccacaccacctgatgctggcgggcggcatcggcatcacgccgctgctggccatggccgagcagctgaccgcgcaaggccaagcttttgaactgcaccactgcacgcgttcgcgcgaacgcacgccgtttgtggagcgggtagcggcctcgcccttcgcacgccaggtgcagcaccac
		catatgggcgcggacttgggtcaaggaactgtcatcggagaggcgctccaatgtcccttccatcattggaagtttggcgtcgacggaaggtgccggcacatcccggcgtcgcgagagattcccgcattcgcgcggcaagtggcgtatcccacgcaggagctccatggctctgttttttcagccccagctgcatcccgcgcttttcgctccctttttttgacgattgcgagccgggcgacctcgcgcgtgccg
		ggcgtcagccgattgtcattgcgagaaatcgacagggcgagttgaatgcgttcatcaatgcctgtagtcatcgcggtgcgcagctatgtcgcttcaagcgcggtaataaagcaacgtatacctgcccgttccatggctggacgtttaacaacagcggc
		gaggttagctgatgcaggtgccacatctaccgaactcaatattaagttgacgccaaagtcaccaatataataatttggaagcaatgcttcggcagccggagaatggatcgcttggaatatcgaggtcccatcttctccgcaatatggtacaatcgcatttcctcccggatgtatcgggatgaatgctgtcacatcatagaccttgcctgatactatcagcca
		gatcattgaccaaacgattgattccagtttgatgcatcggtatggaacaattgaggagcaggtaagggcgattttgttcctggcttctgatgagtcatcttatatcactggcacagtattaccggttggtggcggagatttgggctaatgaagcgcgcctttttcgaagatatttcaccctcttcaattacggctggatttctagttgtattgatttcctatgctgggccgatgctgatatttttttcaggccg
		gaacatgaacaactgcaatcgggtcctctgtgattgcttgtgcatcaaaaacagcaagatcagatgtttgtgtctcggtatctaagcgcagagccatcacatacccatcatcttcagcctgtgcgccatcacgtggaatgaaaacaggttcgccatatccgtaacgagctgtgtcagttcgagcctcaacacgtcgactatcaagatcaactttgatcaaagtgt
		ataaggatgtcatcccgttgagagatgacatccttcttttgtattttttgtttaaagaaattactgcattttttagcgatcaacactagtatacgacgatacctgatcggatgggccgctcacgtatctggggtaattggggtaagaacataacagataacctgacccttcgggtttgtcgccaattctgccttttgtatcaataaccaatgtttttgcaggagcctggttgttttccacccaattca

## Sheet: Secondary Metabolism
Subsystem Hierarchy 1	Subsystem Hierarchy 2	Sequences
Secondary Metabolism	Biosynthesis of phenylpropanoids	ggcgaggtgcgggcctttgccggcgatgcgctgggcgccgccgaacgcgcggaaggccaggtgctgttctgcaacgcccggccgcgctccgatctggtcattgcgccgcgttcgatcagcaaggccgatccgtttgcgcgcaagaccattgatgcgcgggtgttccgcctgcaaaagctcgccgacgacgtcatgctggtgcagctgcgctttcccgccggcatccgcgtcaagttcaaggcgggg
		cacgcccttcgacgagacgtcgtggagcaacatcgacttcaagggcgcgggcgcctacatcaagtcgaagaccctggccgagcgagccgcgtgggacttcgtgaacaaggaaggcggcggactcgagctctcggtggtgaatccgaccggcgtgttcggcccggtcctgcacaaggacttcgcgggatcgatcactctgctgaagcgcatgctcgaaggaacgatgcccgtgcagcccaagctgcatttcgg
		aaggccatggagatttccagacgccaggcaagaagcatggtctatctgtccgctctcgccagataaaacagcatgctctcgatggtcacgccgggaccgaaggccatggcgcagccagggccagacgtgtcgcagcgttccataatgtccttaaggacgaacatgatggtggccgaagacatgttgccgaacagccgcaagacctcgcgtgccggagccagggcagcctccggca

## Sheet: Cofactors, Vitamins, Pros......
Subsystem Hierarchy 1	Subsystem Hierarchy 2	Sequences
Cofactors, Vitamins, Prosthetic Groups Pigments	Biotin	aaggcaaagattgagaagcttgcggagtggctttcaaaagagccgacaacaagagtgcttcttcgggagatcggcattgagtgaaatagaaacagaactgctgcaggagtatgaccggcgttatgtctggcacccgtttacccagatgaaggagtgggaggctgaaccgcagctggtgatcacgaaaggcgaagggtgctggctgatcgactccgatggcaatcgttatcttgatggagttggcg
		gaagttgcacttaaaatggtttatcaatattggttgaatttaggagagcaacatagaaatatttttttaagttttactggtgcttttcatggtgatacttttggagcgatgagcgttggatcagcagggtttcaagaacattttacaaaattattattcaaatcactgcatataccttttcctgctacttatgaaaa
		gtgaacattggtccagattgagcccactccatcaagatagcgattgccatcagagtcgatcagccagctcccttcgcctttcgtgatcaccagcggcggttcagtctcccactccttcatctgggtaaaggggtgccgagacataacggccggtcatacctcccgcagctagttcttgttt
		cacatcaagaaaccattgaatatattaaaggagaaagtggtaagcattttgatcccaagattgtacaagcctttgaggaaaaattacccgaattatttgcgattcgtgagcaatattgtgattagaaaattatgaatcaacaggcgattatccagcgtgatttagcggtattatggcatccttgcacacaaatgaaggatcacgagcaaaatatgccgttaattcctattaaaaaagcat
		ggaatgagttgccatcaccgtcgtcctgatcctcgacgcgttgtccgcaacggtaggcggcctgatagcagcggcgaatatgccttcatcaaagagccgactgccggcccggagggccttttccgctttgctggtcatgagcgggatgatggggggttttcggaaaacccggtatcgatcccgagggttggaaagaccggcggcaaaccggtcccggttcttccagagcgcc
	Coenzyme A	gccatgatcaacgcatcagcggattcgttcaacaatgcatccaacatttcctgcacacttttcacatggatcatacgtgcgcctacgggcggagtcaatgctgtgggagtggtgatcaggcatacctctgcgccttcatcaatggcggcttgtgcgagcgcatagccttgttttccgc
		caaatatcgccgaactgcgttcggcgctggctaaagtgcgccaggaaggccgaacgattgccttcgccccaacgatgggcaatctgcat
		ggctcaacctccgcgattccggtgtggatgtgatcgtttccgagatcgccgggacacccaattatgagcaggcggtgaaagacggtttcaagcccatggccgcgagcgaagcggcgcagcaggcggatatcatccagatcctgaccccaggaccatcttcaggcggagatctatgaaaagcatatcgcgccgaaca
		tggccgtacgagatgacgatgatgcggtcgcccacggcgtgcatgcgcgcggccggaccgttcaggcagaccacccggcttccgcgcggacccggaatcgtgtaggtctccaaccggcttccgttgttcacgttcaccacctgcactttctcatacgacagcaactgggcggcatcgagcaggtcctcatcgatcgtgatgctgccttcgt
		tgcaggacgtggaggccggccgcgcggtcgaacttgacgcgctggtcagcgccgtgcgcgagctgggccagctcacgggcgtgcccaccccccacaccgatgccctgctcggcctggcgcggctgcatgcacaggtgcgaggcttgtattgatgtggcccccacgctcgcgcacggcgtgtcgctctctgccccccgaggggccgtgtcatgccttgggacggcccggcggcatg
		acgccgttcgcctaccttgaacgccggtttgatgcccgtgttcggcttgtcgtcagcgcgatctacctgttcacccgaacgacgatcctcgcgatcatcctctttagctgcgccaccgtgttcaaagcgatggccgactggcccgtatggaaaacgtcgctggtcgtgggcgctgtcagcattatctacagcgcgtcaggtggc
		atatgggctggcaggccggcgtttttgcacgctctgcgacacggcgagcggcctgcgcaagttccacttgcattgctatgccaccagcgaccacagcatccaccggcacctggcattccgtgattatcttcgcgcccggcccgccctggcggaggcgtaccagcagatgaaggtggattgcgcagccaggcatcctaaagacagcaatgcttacaccgcatgcaaggaccgg
		tgcgacttgacgcaaagcaaaatcaaatcagcatcagataaaagtgatatgtcattactcgctttgatgggtatggtctcattaaatgtttgacactccattgctaacccatgatcctgtattgctagagcgcgatccgatcttccgactagggtaacgtcgtgatgggcacgagccaaca
		tactatcggcgcgccgatgatcgttaccggaaaatgaagatctcgcaccatttgccggataatcgccagctgctggaaatctttttctccg
		tgcagccggtgatccgcccccgtatttgaatctgcaccgaaacgacgcatgccgatgggcgtttgcgggcctcgaaactcattatcatcgccgcatgacatttttagccatcgatgtgggcaatacgcgtctgaaatgggcgctgtacgaccaaccgagccctcagggccaactgctggcgcatggcgctgaatttctggaaaacatcgaccgcttgtctgaaggggcctgggcgcaattgcccaa
		ccgatccatctcggtcacatcgacattgcaacgcgcgcatcgcgcctttttgatgaagtggtgatggctgtttacgacaagccattgaagaatttgttattttcccccgaagagcgcatctcgctcgtacgggaggcgttcaaggataacccgaagatcagggtcacgggctacagcggactgacagttgattttgcccaccagatcgacgcgcatgtggttgtgcgcggcttgcgagtgttttcgga
		ctggacccgaccgccgaggcgggcatggaccatatcgaactggcgcgctgggccgacctggtcctggtggcccccgccagcgccgatgtcatggcgcggctggcggcggggatggcggatgatctgctgaccaccctggccctggccagccaggcgccgctggcgctggccccggccatgaatcagcggatgtggcaacaccctgctacccaggccaatgcccgcctcctggccgatcgcggcg
		aggtgagttcatcaaccattagtgactttgcccgcgaggtcctgcttgagtcagtgccagctgcgcatattggcccggccattgatgtagtcgatgaaccaaatgatgactcgcaagtaactatgcagtcgcacactttcgagtgcacctcaccggcttacccaggttggtactgggcggtcaccgttgtttcaatcgatggccagtctgaaaagacagttagcgaaattaacttgctacctggtt
		atagtccctgcactggccatagcgccagctcccacatccccacatgccagtttcttcgaaaccacatcaatgacttgggcgccgtatacacttctgacttcgttcaggtgtctggcggtgaatgggttcgcccacattaaagtgttcatggcgggtgcgagcagcattggcttggcggggtcccaggctcgcacaatgcaggtgaggaggttgtcgcagagtccgttggcgagcttggcgaggg
		cagcgtgctgccatgccgccttcaatcaggcgaatcgcatccagcaccaccacgtcagctttcgagctggcgatgcgctcggcgatagcctgccggatcccgggcgcaagcaactgctcgagctcgcgcaaggcggctcgatcggccatcacgatatcgcccagccgacgacgatcgatggtcccatcggtgcgcaacagatccgatccgaaccgctccgcg
	Coenzyme M	ggaaaggcgcgcggcacatcgtcggctttgacgtagacctgcgcaaacgacacacctgtgcgtgccaccacattttgcgcaatagttttgacctcgcttgactctttcactttgaacgaattagaaatgccacagcctttcgcgactgccgtcaagtcagtgcctagactgctgtggctatgctgcatgccggtttcgccaaaatggccgttatcgagcacaacgattgtgagatttttagg
	Fe-S Clusters	ctttgtgttccgtcttgacggtgatcagatgcttacctttgttctgatagaagttggccgcacccttgatcgccagattgttggcttcggtcgcacccgaggtccagacgatctcctttggatcagcgttgaccagtgctgctacttcggcgcgcgcattttccacggcgctttcggcatcccagccatactggtgcgaacgcgaagccgggttaccgaacttctcggttagataaggcagcatggcctcg
		actatgtggaaggtgaatacgctgattatggcggtaaaaggcattgccgtatctagcggctcggcctgtacgtcagccagccttgagcctagctatgtgctccgcgccttaggccgctctgatgaactagcgcacagctcgattcgcttctccattggcc
		tcctcctgatgtgaagtaaatctcatccggctctgctcccagggcttttgcaacctgggaccgggcggtatcgatcgctttcttcgtaaccctggctatgctgtagattgaggagggattgccgaagttctcgatgtggtagggtgccatcgcttccaccacttccctgcggacataggttgtcgcagagtggtccatgtagatgatgcgtttctctcccatgatcggtcccgtgtaacctgaatatgtg
		gcggttcaccgcggtgcacaccaattggcagaggaagcgacagatgcctttgaaggggctcgtttaaaggttgcaaagtttctaggcgcaaaggaagaagagattgtcttcaccaagagcgcaactgaatctctcaaccttgttgcttatgccatgggaaatgccgaaccgggaaatcgctttgcactgacagaaaaaaccgcatcgtggttac
		aggttcttaaaggtgcagagaatgcacggaatttctcacaatgcgattctcttcttttaggcgataaatgcggagcacatacatttccatacattgaggttgataatccaacggcaatagttgaacacgaggctacaacatccaaaataggcgaagatcaaatttttattgtaatcagagaggtttatccactgaggatgcaattgggcttataattaatggctatgctaaggaggtgct
	Folate	agcgtgttaaccaataaatatgctgaaggattgcctagtaaacgttattatggcggttgcgaagtggtagataaagtagagcagttagct
		agcttctacaccggctgtacttccaacctggaaaacagattaatcaagcacaatcattctaaggttcattacacaaaagacaaacttccggttgaactcatcacatatctcgcattctctgataaaacaaaagcataccaatttgagaagtatctaaaatccggttccggaattgctttccggaataaaaaggttg
		gatttccattagttacaactaaaaaagtatcatttaaaaatgtagcaacagaactgatttggtttttaaaaggtagtacacacgtccaatacttgcgagataataacaatacgatttgggatgagtggatggttggtgatgaattacctgaaacatatcctaagcattggcgcgcatttggtgagc
		tggcccatgatgatgccggcacggggccctctgagagtcttgtgggtggttgtagttacaatctgacaataaggcaccggtgacgggtaaagaccacttacaacaagacctgcgtagtgcgagatatcggcaagaacaacagcaccgacttcgtcagctactttgcgaaagagctcgaaatttatttgtcgagcatatgcagtagctccacatataatcattttcgggcggttggcgcgggctagctcacg
		gaaagatccgaaggccacaattctatcactctcggctgcattttttcgttgctgcagcataagcgtgtgcagggttttcataggtctcgatctgggttggttttacccccaatccgaccagaatttcctgcaactgtgaggggctggccgaacgcggactatcgaccggaaccaggtaccagcgattgatctgtttgagcagcggtttgagcacacccgtgaggtctttatcggccatca
		gtgcttttattatttcattctgaaaaacggatcatcactcttttgtgcctgaaaataatgttcactggttggccatacctttccctgtatatttattggataaggtgcgaaattggaaattgcccgaatggaccatttactttgttgaaattaatta
		gcgcatgttcggcgaaggattgatccaggtgagccccgtcgaatcgaaccacatcgaacgccgccaattctccattcgaatcacgcgcacatcggcgttgagctgacggtcttcgttgtaaagacgcgccaactctccgacggtcatgccatgacgaaccggaattgtgtggtaagcgacaaacgaaagtttgtcggc
		gctacgccggcgaggacttaaagcatggacaatgcgtgttatccgccggacacttgctgcgccctgccgacttgggtttactggcct
		ggccagggttaaagcgcgaatcatccgctctattgctaacgcgcttttctgccaatcaattttaccctcctctttagagaattattggcataggtagcttgagcgttattttgtggtgtagctagagcttgaccattttcaattttagttaaaacttcaagtaa
		cgcatgccgggggcgaatgtctattcgcgcgacgacccgcaggcctgcgtcagcgatagccgttgtcaactcgtcacgacggcgcaagccgaggtgttccgccagatcggacagtatcagccagccttcgccaccgggttcgaggtgggcgtcgagcccgttaaggaaaccgcgcagcatctggctggcgggatcgtagatggcgtgttccagcccggcgctgggttgtccgggcagcca
		cattcaatattgcatcatatggtttattattagaaattatagccaaatcagttaatatggtacctgatgaactaattggaaacttaggtgatgtacatttatattcaaaccatattgaacaagcaaaagaacaaattggtagagacttaactgatgaggaaagatacaacaaatggtttaataaaaattatgaaacagggatggaaagattatttgaccctaatgatt
		atcaatgaaatacggcaatttcacattcacccctgtcagcatcccgggagttagccttcatccaccctgtgcaggaaagaaatgccgtggcgtggatttacggaaatactatgataaaaacccatcggaagagggaaaaataatcctgaaatggttgctggaagccttcaggaaatggaatggcccaaccccgttcttcaacgactatttc
		accaagcttgtagttctgtatcatctgatgcaattgaattctgtctattctttgtgtcttgcaatctagcttcacgaatcacaaaatctaaatctttagttgggtcagcataacgctgactaaactcttggaaactaaaactacggtgtcttagaatctgtcttgcgatatctctagttgtttcaatctcaatacaagcagacaccatttccaacggagaccagtgttggtgtttaaccaaatat
		gatgatgtgaacacatactagttaatggaatatttctttcgattacaattccatcataaccgtctgatgggaatgaagtgatttctgacattggagtatatctacctttccataaatcattaacataagctttagctacacgtcttggtgtatcagatgagtttggatcatttttccaatcac
		ggtctcactatgtcacgcatgtatatgtctggatcactccgttcatggatccactactgcgaactacgtatggccaacggaacgcagaaggaacatcgagtaatcgcagaacaatgttggaatgttatcattgaacaattcccttcactacaaaacgtattaaacaacaatcaataaaaacaatttaggagtac
		ggcccacgcgatgtcgcggtgctcctgctgcgtgctcgggtcgagccggaccttgaggtagtggatccacgagcgcagcgtgccggccatgtacatgcggctggccgtcataccctcgggcagcacggcgcgggcgacctctttggcgatgccgcgccgcaacgcttcttggtagatcgtgcgggcggtcgagtccgcgatcgtctgcgcatcgacccaccaccggcgaagatcggggtcgtcg
		gccagacgccattgtcggcacgctctcgggggggaatgcgcaaacgagtcgccctgattagtgccatggccaatgagcccagcttgcttttgctggatgagcccaccaaccatctggatctcgatggcatcgcctggctggaaagcaccttgaagcaatggcctggcagcgcgatcgtcatcacgcacgatcgccgctttctcgacgcaatcgccacacgcattg
		cctacatctaaattgcacacttgcgctatcaacgcagtcagcaagctatagcttgcgatattaaagggtacacccaaaaacatgtcgcaacttctctggtacatctgacaactcagacgattgtctttacttacataaaactgagcaaacatgtgacacggcggtagtgccatttgatctaactcgccgggattccatgctgttaatacatgtctacgtccgtgcgggtcttgcttaataccgttaa
		gaggagcacattggccccctccttgaggatgcgcgccaggtggacccggttccgctcgccgccggagagcatgccgacctttttttgctgatcggcgccggaaaaattgaagcgggcgacgtaggcgcgggaattgaccgactgcctgccgagctggatggtctcc
		gcgcgagcatcacgcggcgcttcatgcccgcggagagagtctcgaaccgcgcttcgggatcgagcaacatccgcgagatgacctgctccacttgcagttgtccctgccagtgatgttcatcctgcgcgatgggcgcatccaatccgctggcgacaatgtcgaagactctgccggtcacatccaccggaacttcctgcggcaaatacgccacgcgcaaattttg
		tctcggattgcgtgagcttgtggccggcggccttcggcaggaagtcgccggagccctgccggttgttcgcggcctgcgcccgccattcgtcgtcgtgcgtcgattgcatcgagtcgatggcgagcgaatagcgggtggaatattcgttgatgctcgcggtgcggtggcggatccactgccgccagcaatccatcggcacccggacgacgaacttcagttctgccatctcaaagggcgtggtgtgggcg
		gccggaataaatgattcacgaagccgacttcataatactggatgagcctacgaaccaccttgacctcatcgttatcgagttccttgaagagtatctcaaacggactcaggcttaccattctgatggttactcacgacaggtatttccttgacagagtgtgcaaccatataattgaacttgagaacgggaaactgtatacttataagggaaatta
		cgcggcgtatggttatcggtggaggcaccacttcggattcgatcaactcaaccgagttatcgaggtgctaaccagagacactaccacgcgtcaagctgtagttcagatgtgggaaacatctgacctcggtaaaatcaccaaagacaaggcttgcaatatgcaggtaatctttga
		agcggacacaatcaatactgttcctgtcgaaaccctcaatgcttaccgggatcacggtgatccgaaaccccggcttgaaattgatatcgagaatgcctccactatgctgaatcgtctgactgaatttcacatcgatatcgatgccttaacacaacgactagaggttgaaggtgttgacaagttcatcagttcttttgacaggctgatggaagcaatagagcaaaaaaaggttacgtaccctttctcattt
		gcgacgtgttcagcggttgtcttggtgtcgtagtagccacggaccttgaatgctccgtgagtgcttggcatcttggcttcagcttcgaatctgattcgacttaccgaatcatcacttgggattggatctgctacctcgcgatagttgaagatctgctcgatgctgataaccggcaagccttctttagcaccgacttcctgaagctctggaagacgcatcatggag
		ctgacccctacttccccctgatgcacactcacgctgccaccccatgccggagcaatctttttcaccggacagccatgctggtcggcaagccggccatggaccggctgctggcgagccgcgtggcggtattcggggtgggcggagtcggaagctgggccgccgagtcacttgtccggtccggcattgagcatctcacgattgtggactccgatgtggtctgctccacaaacatcaaccggcaattg
		gagcgggccggcgagttcgacagcgacgcgatagttgtggccatgcaaacgttcgcagatgtcgccagcgaacgtaatgaagtgcgccgcggcgaagacatgatgttctttgtcgaggcggatgtggaacgattcgctcatcgggtatcactcttgtgctgcgaaccattgtggccgttgagcgggtggtgcgaatgctggtgccagctggggaaaatccagccctggcg
		aaaaattaattatagtatttatttaaaatggttcgacacttttattgctgattttaaagttaataaagttatatacgttaagactgacccagaggtttgttgtcaacgaattatgaaacgctctaggcaaggcgagtctcacattcctttagaatatttagaaaattgccataaa
		agtgcttgcgcctgacgtaccgagcttcatctccatctttgcgggacgaatcgcggacacaggaagggacccagtacccctgatgcgtgaggcgctcgcgatcatgcgcgcgcgccccgcctgcgagctgatctgggcgagcccccgcgaact
		gtagcccatccaccgagccatatctacatgatactcgaattcctctacggaacgcctgacaacatcgtcgtcgctactagccaaaacacaaaattgacctggatgaaaactaagacgaacgcccagcgtacgagccaattcgcccacctcggcaaaagctctctccgcgtaagcgcgagtatcgttctgctgccaaaaatactaaaactaggctcagtatagaccagggaggatgtcgctagataa
		cgtgtctcagcgtgtgctccacgcttatcggggtgatcacgcagcagcgcggacggatgacgttcgtagcgtcgagtcgaccgcccatgccacctcgaccatggcctcctccaccttgctctcgctgaaatacaggaacgccaaggcggtggtgatctcgaagaatgtcagcggcctcgggaaagtaccggactcggacagctcgcgcatctcggagacgtactttgccagtcgttcc
		agcagtcttggtcagccaaggccaacaataggtcggccgccaatttacctgtaccggcgcccagctccaataagtcgccgcgcatcgcttgaaaaatttgtgccatttgctgggcgatggtgcgcccaaataagctagtcatttctggggcagtgacaaaatcgccaccgtctttttgcatttggctgaacttttgccggccggcagagtaatagcctagaccaggggca
		tgcctacgctatgtatgtgcgctggcgctggacggtatcgctcaatggagttcttaacttcctatctctacgcctagatcctcatgcccaatatgaaattcaggaatatgccaaggcagttgacatgatggttcatcagcactatcctattactagttcggcatggaac
		gatcgtcctcgaccgccccaatccgaccggcggcgatatcgtcgcgggattcgtaccgcccgtcgaactcaccggaaagttcacgagcatctaccccctgccgacctgccacgggatgaccatcggtgaactcgccaaactcttcaacgaccatttcggcatcggcgcggcgcttgaggtggtc
		tgcatgagtcttatagggtttcatatcgcaattataagaagcttattgaattgggggtatgcagagaacaagcaagggttttgcttcctgttgggatgtattccaaagcagtttggactgcttcccttcaagcaataatgaacttccttgaattgagattagatcatcatgctcaaaaagagattagagattatgctgaagccgtgctaaatttaaccagttcc
		aatccgtaatcatgccatgttgaaccgtatcccatccatcgtgccatatcaacatgatattcaaattcttctatagaacgattaacaataccttcattatcactcgcgagaacacaataaggcccaggatgaaaagacaaacgtacaccgcgacgccgggcaatacgtcccacttcggcaaaatgccgctccgcataatctctaacatctgcttgacaccagaaatacttaaaatcattatgtgtat
		gccatgttcctgtaatttatatgccttaagttttattgtacaaccccaaatgccccctgccttcctgattcatataaatcagaactccttttccttctttttcaataagcctcatggcttcctgtagctgctgtccacaatcgcaacgatatgatccgaaaatatcacctgtcatacaggagga
		tcgattgtgatgcagttacgagcctcaggtgacaatctcttgtaagcggctctgataccttctggcccttcacggcccgagatgtgtacgttaatcttataatcttggaattgctttccgaaacccatccaacggaccatatctgcatggtattcgaactcctctattgaacgttctacaatgccagggttactgctagcaagaacagtaaactgacctggatgaaagctaagacgcacaccgcgact
		atagggttaggtcacctaaaacaagcctttattcgggttgatctatatcaagcgatgagcacatatttggcaatgaggattgcgagaaaaataaaacgaacgaaagcaagtacttaatgcatcataaaccatgagctgtccaataggtatgagacccacctgggcaatcagtttcaaagcttcgcttgcttgctgtgcaccaatcacactcaccagtggagaaaatatgcctaaagtaacgcattga
		taactgcaacaagaacaatttgatcctcaggcaagagcggccccactcgatgaatcactagagtttgatagatgtcccaacgcgctttagcctggtccaaaatttcttgcaacgctttttcagtcatgccagggtagtgctccagcgtcatgcctttcacttggctaccgtcattcatatcccggaccgttcccaggaaagacaccaccgcaccaacacgtggatcattcctacgaagcg
		ttgtcatgctcgcaatgattcagagcgttgtgttctgcgtgaatgactcgtttgagcttttcttcgcggtcagcgtaccactctggacgatcttccatgtttgcaggaagccgttgtagccaagcgaagcgaccgtcttgttcgggcgaacgatgactgctccgaccttggtcgaaggatctttgctccaaccagcaaccacagaggtcaggtgagcaaagcgcatgtcccatttgttatt
		aaaatgaaatattttatagacagtgcaaatgttggcgagattgaaaagtggcttcccatagtagaaggtgttaccgttaatcccttccttttagtaaaagaaggtattacagtagttaattttttaaattctacaaaaaatttaaaaattaaaaaatttgttcccatatcaaatatagaacattatgaatatataaaagccaaatgcggaagtgattttata
		cttttcctgaaagaacagcgtgtgtacaaaatgctctcacgctacttgctcctctgtcgaatagcatatcagctgctttggtaagcgtgcccgctgtgtcaacgatgtcgtcaacaagaatgatatcacgaccttcaacttcaccgataaccatcattgagtcgatctcattggctttcttgcgttgtttgtcacagatcaccatttctgaattgaagtatttcgcataccct
		accacgactttggaatgatttcgagaaaaccataatccaagggagtcctgttttcataaatgcagttttaccatgattatgctcaagtaatcgacgctcgaggctttcagtttgtccagtatagaactttttaagtgtttcgctataaagaatgtaagtgtagtacataaccaaaaaaaataaaaaaaagggagcagtaaatc
		ttatggaagggaagtgtcgtgagagtggctaaaaaaacaagtgcgggacatcgacgtagccggcaagcgggtcctggtaagggttgacttcaacgtccccctggacaagaatggccaggttgcggatgacaccaggattgtcgaggcgcttccgacgatctgagacacgcaacaggggtaggcaaggcacacaggggatagg
		tgctcgaccttgttgtagtccagcacctcgttagcatcaaggccgtactggtggaagttgtagagcttgccagaggcattgaccgatgcgccatgcgtc
		gttggtccgggccaacggtaaagttgctttaatataccccgccgcccggttgacggatttattgatagccctgatcaaagtccatctttcgcccacccggcttcgtccggtatattccaaacccggcgccaatagcaatttagtgctattggaagcgaggccaagcgctaaatgccctttggaaata
		agttagatttggatagtgggattttaattcttccgccatcttgtctattaagctagagaaccacggcatgtcgtaaactaaaccttttacgagatcattcgacctcatgactacactaagatgcaacttatcttcacgtatcaagaagttagcgtgcattgtgcaagtctgatccttgttgccc
		gaaactttcattttttgaaatgacagttgggcttgcatttcaatattttcttgatgagaaagttggcgtggctgttatcgaaacaggtctcggcggaaggctcgactcgacaaatattattatgcctgttttgtcggttattacaaatgtcagtcttgaccatcagaatctgctaggaaatactttgcaggaaattgcttctgagaaagcaggtattattaagccg
		gatcgtcttgaacaccccgaggtaccccgttgtaccctgtctctataattcgcttgctgtcgtccactgcaacagcccctacctgggtgctgtccttagaccacgtagccacatgcttagccagtgctaagaaccggttcgtccacttcatcgatcacgctcctttgcttcgtcaatgagcctgtcctgttcatgctgcatgtactcttcatggctaggccacatatcaggctcaggtgggtt
		taatagagaatgctaaaatagcttatcaggaattaatagaactaggagtatcaaaagaacaagcaagaactattttgcctttaaatcttaatactactatggtgtggactggaagtttttatgcactaataagactgtgtaaacaaagattaaaaagtgatgcgcagaaagaaacaagagatttagtagaagaaatgttgcgacaagttaaagaaacaaatttatttaaaaaaaatcttttaaaa
		aattcaaggtagagcctatattggagtatttccaggtaagaatgttattggactaagtaagttcaatcgcatcacagactggattgcaagtcgtccgcagattcaagaagaaatgactgttcagattgctgatgagattgaacgtgtaacagaagcagaaggtgttgctgttcttgttcaagcagagcatttgtgtatgacacaaagaggtgtgaaa
		atgagtatgccaacagagtaaccgggagagaacaccacatctccgttgaaagatttttcaagacctgcaatgatcttcatcagggtggatttgcccgagccgttgagcccgatgacgccgattttggcgccgtaataaaatgaaaggtaaatatccttcaatacttgttttgctggcgggaatgttttgctcacattcaccatcgaaaaaatgatcttgcggtcgtcggccatggatagattttttgtttttc
		aatagcccagatgaggaaaataaagcgccatattcatgtaatgggaaaacgttatccagccatcatgcgcaataattgcatcgacaatatactgaaaaagcgttttattggcctgttgattcatggtcatccaaaactcaaaagcatcccattcaaaaaattctcgtatttttttatcacaatttagcaaaacaaatacattgcaactgaccttattcat
		aactggaaccaaatcaatatttggttggcagataagacataatatgaaggaaggatttcctttattaacaactaagaaaatggcttggaaacaaatagtgactgagttattgtggtttttaagaggcgatactaatatcaaatacttagttgataataattgtcatatttggga
		tgatgaaatacctttggcaacatgagcatacaagcccctttagaatgactactctcaaattcaagatcaaagcccccatctttgtgctacgccaatggatgaaacatgttgtaggttgtacatggaatgaagcctcagctcgatacactgagattgaagaaaatgatttttttacacctcaaacatggagattacaacatcctagttctaagcaatcaagctatggggaagtagatccac
		aatcaaccatttgacttattccattctaaagcttcagccacatcaggaaagtgatgagctataatatcacggcattgttcagcaacaatcctatgttcttttttgagtagcaatatcagtgcgaatatttataaagtgaatccaagatcttagcgatcctgacataataattactgactcagtaagaccttcaggaagtaatgctctagcctgttcctttgcgattccaagttaattg
		tgctgccggtgtggtggtcgaagcaaccggtgaaaacttcagtgttcaaaccggcaacggaattctcagaattatcaccgttcgtccagaaggacgcaggagcatgacggcgggtgaatatttacgtggggcatccatcagagagggatcgcagttgtatgaatagccgtcagcttattttacggatcatgaccgcctgggataaaaggccgggcaatctggagcgacttgcgagcttaccct
		catcttttccgggcgaatggcagcaagcacctccgcttcatcaaactgtgacggtaacggcagttgcaccaagataccggaggggaagacaattaac
		tttgtggcttgaattcggtaattaaggcgctgcgaaatgaggaaacgatcatgacgggtgacgcgccggctgaacgcagttgatagctgtcttttccaggataatctatctcaaaatcatgatgactgtgcttgatgacgcctgtctttaaaccgatttgctgtagcaatggaattaatttggttagtagagtggttttacccgtgccgctgtatgcagcaaaacccngtaacggtggataagccatcgat
		ctaacttgtctattgccaatgcctctcagcatttgcaggtattgaaagttgctcagctggtagaaatcaaccggcaaggcaattttatttactaccggctttcaaacagcaatgtgttcaaagcatggaaggcattgcgtgagttgggtgttgaacgaattgctgctattgataaagtggtaaaggaatttagaaaatctaaattcgattttgaaacggttaccattgatggcctgattgaaaagttagact
		tattattaagaatctgaaaatgaaatacagaccagaactgccatatgcattaaatggtgttgatatcaaaatataacctaaagagcatgttgctatagttggcagaactggttctggcaagtcatcactagcaatcactctattcaaattatactagcc
		ggatcgttacacaatatattcctgcaggagggccagtgccgccagctcctgtctgcccccgcacttgcggatgatgccggcatggtactcgatctgatttttcaggtctgcatcccgggtcttcaggtaccttgtcgcatgcaccgtggcgtcgatgatactgccaaatccccggttgaccgggtggatgaccggttcacggatcagttccttctggagcgtgaggactgcgacctcagcttccggag
		tagtcaatatcttctgttccttcagctacgccgtagtgaactgcgttaaaccatttacccgaataagaaacagcagcgccgtgagttaaatgaccaccatgtggcaatgacattgccaagtaagtatcacctggttttaaaaatgcaccaaagac
		cggtcaggcggtacagcaccgctcccatcggccccaggccaagcgccgaaaggaccgagaaccaggccagtacaccgaatacatggcgatgcgccgcaatcaccgaatactcgatggacctggcgcacgatctcgctcttgggcaaaccaccggcatcgacttgctgccagctcgccagcaactggcgcgcgcgctcttcatcgcccgactccagtgcgtcgcggatttcagtgaagt
		tggaatcctttaactgtagaccatgcagcattgccaccatgtcatatgttttttcaattctatgtaagagatgataaactgtcattattgttctatatgcgttctaatgacatgttcttaggtaacccttacaatatagcaagttatgccttactgtgccatatagtggcatttctgaccggatttgaggtgggtaaactggtttacatgtgtggcgattgtcatttatacacaaatcatattg
		gacgaggtcagcgtcgtgctcggtcatcacgccgatgccgtggaagccgccgtgggtcagttcccgatcacgctggtgcgcaacccctcgcccgacgatggccaggcctcgtcggtgcgcgtcgggctgcaggcactctcgccgaagctcgatgccgtgatcgtcgccctcgccgatcagccgctcgtcacctcgcaggacatcaccgcgctgatcagcgcgttcaagcagcg
		gcgtatgagcctgccatccatgcctacctgcgttcgatcaaactggacagcacgtttggcaggtcctacagcaacctcggcatggcgtttgtgcaaaccggcaaatatcaggacgcgatcaatctctatcgccgcagcatcgagctgcttgcggacgataacgagaaagccgccacctggaataaactcggcatcctttatcgtcaggtgaaggattaccacaacgccctcgatgcgta
		cgggtaagctagtcaagtatttggttaaaaacaaacactggtcaccactagacatggttgatatgtgtgttgaaattgagactacacgagacatt
		accacaaccagtccccaggtcggcaatagcagatcgggctgttatgtcggcaaagtccgccagcagcagcgcatccagcgaaaaacggtaaccctgccggggctgggacagttgcaaatcgaactgcctgagatcgtcacgtgtcagcacagcggcttcacccttcaagcacccgtctttttctgcggatcatccactcacggaccagcatccctgcaaacngcgcaaaagagccagcgtcag
		gtctgaaattgaagtgacccttattgatagttgtggaaatgaccttagtgttgtgaacgcagcacgagtgtctttccacaaagaggctgctgaaatgtctgagaaggatcagaaactgctgaactatcttgccaagcacaagcacttcagccccttcaatcacgccttcctatcctttcagggtttaaagcccctgtctttgttgcacggcaactgg
		aataagcacacttcaccttttagacattctttcattaggtttgagattaaagcgccaatctttgttcttcgtcaatggatgaaacaccaagttggatgttcatggaatgagattagtgcaagatatgttgaaatgcctgaagaagaagcttttttatcctatctcttggagataccaggatcaaaagataagcagtcgtctactggtgaactacctgctgaagatcaagntgaagcaatggattta
		atgaccttatcctcagcaatatgttttggcaatggcaactggactatgaaaccgtcaacttcgggattgttgttcaatgccccgatgcactgaagcagct
		tgtcattagaacgcatatagaacaataatgacagtttatcatctcttacatagaattgaaaaacatatgacatggtggcatgctgcatggtctacagttaaaggattccatgcactgacaatatgtcttctactataaggattctctttaatacttttaataacattagcaatttggtctactgtatattcagaatctaatccaccaaaatgtcgccattgtttagcata
		agcggttcggcgccaagaacaccaaggccacccaggcccagagccgcctcaagcagatcgaacgcatcgaggtcgaggagctggcggacagctcgcggcgcgcccccatgctgcgcttcgtccccgagcgcccgagcggccgtgaggtgctggagctggcgggcgtcagcaagtcgtacggcgacaaccacgtgctgacgaacgtgtcgctgacggtccggcgcggc
		catgagggaaagacaatcctgttccgccaccaatatctaaaatggtttcttcactctttaacttacttgctgcccatgcaccaaacaaacatgagtctgtagtcactttcatggcacaattggcctggatgatcgtgaattgggcaactagcttaaagtcattattaagtccaacctgtcgatatactgctacgcctgtgcgggctggagtggcagacaggcccagtcgaatgaaattgtgcta
		ccgcggcgccgtagtgctctcaaaaggggagcgcctcacgcccgctgcgcttggtctggcggccagtattggcatgggtacgctgccggtgacgcgccgcccgcgggtggcgctgttctccaccggcgacgagctggtgatgccgggcgacatcgcacccgagcagatgccacccggcgccatctacaactccaaccgttttttcctgcgcgcgctgttgcagcgcctgggttgcgaggtgaccgactac
		ggcgactaatatctctaggtagcattaatctctaaacaagctgaagccagtctcaaagacagaccagttgtgcattttaatacaatatcgaagcagcccagctacatctggattatcttgattagcagggattactaaccctagcacacttcccggattaactgctctgcattgggtgttacccaaactaaactaac
		cggccgaaggcgtagccaagctacgtgtcacgcgcagcgaacttgcgcaactgtctccggccttcttttcttgcaccttcggtgccggcgg
		atgccctctaccgaaaatgtagccatttttatttgggatattttagtacctaaaattaaggaaatgggagctctgttacatggtattaaattatatgaaacagatagcaattatgtagaatattttggggaataaactttttagtgttttccttgttacgtattaaaatcatagattatgttaaacgaagaatttgagcaagatattact
		gcgtgacgatgttggtcgcatcaagcctgccgccgagtcccacttcaatgacagccgcagtgacgccgtattttgcaaacgccataaaacccagcgcggtggtaatttcaaacgtggtgagcatggcgatctttgccacgtgcggtttgatctcttccaccagttcgatcatctgcgcgtgggaaatcggctgcccgttgatctgaatccgctcgacataatcttccaaatgcg
		aagaaggtgctcgaaagtcttgtcattgatactgaaaacgatcataacacaaatgagtactgctcatcgtgttgccaagatgttcatgaacgaaatctttgctggtcggtatgaagcaaagcccaaggttacggcgtttcctaatgctaatgcttatgacgaactttatgtaactggtcctattactatacgttccacctgtgctcatcattttcaggcaattcaaggtagagcctatattggagtatttt
		taaacgaaagcacgccaacaaaagatagtcttgaggaggttcttgactatgactttatgcgtagaagtattgttgaaagagtggccaaggggcatattcatttgcaagaaactctatgcgatgacgttgctaaaattatgctggctcaccctcatgttagagcggtaagagtttcaactgccaagccagatgtttatccagattgtgacgctgttggcgttgagatatttttgattaaagaatgaaag
		catgcccacatgactgtcgagatctccacctcacggatgatcagcgcacagatcctgcgtcaccgctcgtttactttctcggagttcagccagcggtactcagagccgatggactacgttccagtaaaggctcgacggcaagcggagaagaaccggcagtcaagcgtggacgacctggaggaaatcgttcagcaccgctgggacaacatccagaaaatctatctggaccgtcgcccaggc
		gtcgatgtaaaggctctaattttcgagcgatcacatcggcatcttcattccagttgatctcagcttcagccttagagattttcgcagcctttgtcgcttgatctgagctttgtggagttggcttaccaccatcttcaattattgaaatggtttcaattagagcttccgcacctagctcagataattcattgaagagctcgtctgatgtaatgtcatcatcgaggg
		gccggcaggaaagcagcgacgcccgcggtggaggcatgcgcgcgatgcgcggtgccgaagcatcattcacataaatatccgccagcgatg
		taataattattaactttaatttcattattgctatgataacgtctgttgcaattcagttcatgaaaaaatgtttcaaaatattgcaccgcactccttactacaggcttaacgatcatatgaaatccaaccagcacacactcacacattttgatgccagcggccaagcccacatggtagatgttggcgcaaaagctgaaacacaccgtattgcagtggccagcggcaaaatc
		cgtgtctcagcgtgtgctccacgcttatcggggtgatcacgcagcagcgcggacggatgacgttcgtagcgtcgagtcgaccgcccatgcccacctcgaccatggcctcctccaccttgctctcgctgaaatacaggaacgccaaggcggtggtgatctcgaagaatgtcagcggcctcgggaaagtaccggactcggacagctcgcgcatctcggagacgtactttgccagtcgttcctcggaca
		gccaggtaatccaataaaaccaggcttcaccgtctctaggctcgcttgatttacgcactgcaccaaatgctagtggcttacccggcttgatggcaatttgccaaagatctaatcttccctcagcagtgactgcaggcttaatatgatcttcttccccaactgatacgccgccagaggtaattattaagtcatgatctttactggcttttcgcaatgcttcgcgtgttgcatccaatcgatcagg
		cgtagagagcgccctagtggattaccatgacgcgcttgctgatggtgttgcgccagagcaggcacgccttcttcttcctgcctacgcttatgtatgtgcgctggcgctggacggtatcgctcaatggagttcttaacttcctatctctacgcctagatcctcatgcccaatatgaaattcaggaatatgccaaggcagttgacatgatggttcatcagcact
		tggaagttttttcccattttcttgtagattaaaaagatgactaatttttcgataatatacagaccgcttatttttagcagcaccatttggtaattctagagtaattttagtatctccagaaacacaaaattcctgaaatgaaaagctacgatgtctgagaatttgtgcagcaattgctctgctggtaacaattttaacagtcatatgaacc
		gtagttaacccttcaggtaatactgcccgagcttgttccttagcaataccattattaattgcccattcataagcttctttagcatggtagataagatcccattgtgttttgtcccataatgcttttagttcttcatcactagtctctactgagttttgacgattaa
		gacctgggcttggagccggcgggcctcctcgaccgtcttcccggtctcgtaggcgagccggggcgagacctcgaggctcacgtagccgtcgcggccgtcgctggcctcgtagacggggcggagggcgtcggcggcctcgcggatgtcctgcacggcgaggcgctcgaaaaggaccgcggggtcggtgaggccgccgcgcaggcccacgaggatgtcccc
		gccggaataatgattcacgaagccgacttcataatactggatgagcctacgaaccaccttgacctcatcgttatcgagttccttgaagagtatctcaaacggactcaggctaccattctgatggttactcacgacaggtatttccttgacagagtgtgcaaccatataattgaacttgagacgggaaactgtatacttataagggaaatta
		ctttttcgttgatgccttcttcgatctcttttttcacgtttgatttggcatcattgaattcgcggataccttttcctatgccacgcatgaattctggtattttccttccaccaaacaagatcaatacggcaagtatgatgaagatccactcagagcc
		gcgcagacgtgcgcatagccacccgctgctgccgccaacaagccggtcttgatctcttctttgtactcttgcccaggttcgcgaaagtgcgagtgaatgtcgacgaaggcgggcaatagccagcgaccagcgccgtcgatgacgcgcgcacggtcggcgcgctgcgcctcctgccccacgcctgggccgaggcgaacgacgcgcccgcgctccagaacgacatcg
		cgtgacatttcacaccagatcattcgtcatcgctcattctcttttcaggagtttagccagcgttatgccgatcctaccaaagacatgggtttcgtaacaagagaggcaagactacaagacgccaagaaccgtcagaacagtattgagacggatgatgaagaaactaaagcactttgggatatagcccaacaaaagtttattgttaatggagaaaagtggtataaagcagcca
		tttccttctccggccgaagtcggagtaatagcagtgactaaaatgaccttgccgttcttattgaactttggattcttgatggcggaaaatttgatttttgctttatgatcgccatagagttcgagatcactggcgttcaacccgatctcttttcccacggatgtgatttttttcattttcgctttttgagcgatttcaagatcattcttcatgatgccacctcttctcggtagaagcattc

## Sheet: Cell Wall & Capsule
Subsystem Hierarchy 1	Subsystem Hierarchy 2	Sequences
Cell Wall & Capsule	Capsular & Extracellular Polysaccharide	gattttctatatttctgattcttccggtgtatgaatagtcggtgttgggaaatatctctcttagatcgtccccgtcaatccatatggtatccttcccgagtttttctactaatctcccagccatctcggtctttcctgtgcccggctgtcctataaataaataaatcatatgtataaattaatggttataagtaaaagggtccctttttttc
		tgcagaccacagatcagatagtcacattgacttttggcttctctcaacattgcaacatgccctgcatgcaacagatcaaacgcagacgcggtaaatcccactacgggtttagacatttagtgttcctttttaatctagatttagattgttgatattaacatgatcaaggtatttgtaatca
		tgtagttaggaaggaagcaaatgactgggacttctcttatgagggaaggcttagacaagcaagacgtatgaaaaaattagccaatgaatcatctgaatacgattattgtctaattgattttgtatgtcctttgcctgaaatgagagacattatttcggcagatattttaatatggatggacacatataagatctctacctttagagatactaatgctatctttgaaccacctacagtctatgactatcggg
		tgacgcgggcacagcttcgcaagcgagaccgacacggagacgataggcccacctgctggagcgcgaagtcctcggcggcgccagccttatcgacggcctgcggacaacttgcgcgcggctcgaaggttcccacgcgatcctcgcgatgagccccagcgaaccgggcgtcatcgcgagcgcgcgcgtcggaaacgcgggcggc
		ggtatgaggggatctgaacgcgccgcaacctgccacgtaacgaatgggccaacactactacgaagtattcctgttgcatagtctctcctgccggactcccttttggattcggggcaacatgagtctccccgggggcccggtggggtctattccttactgaaacttcatcttggcgaagtttaaactgtaacagcatccaga
		gacggcgttctgcgcggcgacgtaggagacgaaccagattgtcgcgagcacgagcatgcgccttcgatacggcgtgctccagatatggaagagcgagcgctgttgcttcgggatctcctgcgtcgcgaaacgatccgtctcgcgcaggccgcggcgcgcgaccgcgagcacgatgagcgggatcacagcgacgaagtacacgaggcgccacgagagggcaggtgagatcttc
		gactgaggcagaacgcccttgcgagcgtcgatcaggatgaccgccaggttcgccgtcgaggcgcccgtcgccatgttcctcgtgtactgctcgtggccgggcgtgtccgcgatgatgaattttcgcttcggcgtcgcgaagtagcgataagcaacgtcgatcgtgatgccctgctcccgctctgcgcgcaatccgtccgtcagaagggcgaaatcaatcgctgagacagtctggcccgt
		gcctcaagcggggattcgagcccctggagcgactgcgccgggaggtggcgggccggccgcgcaacgacctgcgtcccctggacgagacccgggctcccggcgaagtccgccccctgatcctggaagtgaacgccctcatcgaacgcctgaaggccatgatggacgcccagcgccgtttcgtggccgacgccgcgcaccagttgcgcacgcccttcgccggcctcaaagcccaggccgagctggcc
		gctcgactgcctcgagggcgtcgtcgccgacaccggtatgccggtgctggtctccacccacccgcgcacccgcaagcgtctcgacgcgct
		aacgggccgtgcttgagttcgccggccgggtagccctcggcgtggatgtaggagatctccttgagcttgagcgcaccttccaaagcgatcgggtagtgggtgccacggccgaggaacagcgcgtgctggcgcggcgcgaatttttccgcccatgacgccacttgtggctccagattgagcgcgtgctgcacgctgccgggcaggtggcgcagtgcgtccagaaagccggcttcctgctccgtatcaacccg
		ggaagtaattttgtatctgcaatgcctacaaatctttatggtatgaatgataatttccacttaacaaattcgcatgttttacctgcattaattagaaaatttcatgatgcaaaagtaagagatgataaaagtgttgaattctggggaactggaagtgcaagaagagaatttttatatgttgatgatttagcaaatgctttaatattcttgatgaatgaatatgaagatt
		gggttatcgagcggagatgctatctccaccgagcctgcggccaggtcggtaggcccaccggcctggatgatcaggtcgtagagcgtcagtccctcgtctacatggtattccccaggacgctggacctcgcccactatgcttacagtttcttgcttgtagtcaacttccttttgccggtagatcaccagcttatcatcagcctcaagcgcgagattgtcggattccgcacctttggca
		cgtgggagacgcacgtggcttggctggatcagaaattgcgcgagccggaatgccggttgtcggtggttctggcggaaggacgatttgctggccaggtgcgcttggatgccagcggcgcatccgccgtcatttccatcggcctggaaaaaaccacccgcggccaaaatctgggcagcctggtgatttggaaagccagccgccagtttct
		gcgtttcttcatctcttcaacaacgtttatctcgcccactttagctctgaaaaaagggactttatatttcaaagctacatcttcaattgcccttgtggttgagagatttacaactacggggccttttttcttgcaaggagatgatccgcgacaagtgcaattgtatactcctctcccaggggtttgccggtttcatcgac
		gcaactggaactccatatgttctccagtaagagaatgcaatgctttcctgtgctgcctttgaagcagaatatggattgcttgggaaatattgatctacccactcctgatgagcgtgtccctttggtgctggaccatacacttcatcagttgatatgtgcaaaaacttttcaggctttgcaacccttgcccagtcaagtatgttacaaattagagatacgttatttaaaataaatggagttggctctt
		ggcaattttttatttatcaggagccacggaataagccatataattccgaatgaacctacaatcatgaatgttgtctgccatccgaaagtggccc
		gtggctccgctcgaagacaaatccgctcagcacggcgtggttgcctttgagttcgaagaggctgcggtggaaggtcgctttgagcggatgctgcgctcgaatcgtgattggccggtctgccgtgccggatgcggccagggtgaagctgccgtgatacgtgccatcctgcaggatgatttcaacgcccggtcgcgcctcggcgagcgcggcggtaagggcatcggccgtggtgacagcggtggcgg
		caccgaaggcgcccaaggcccgtccgcacagcaggagttcgtcataaccggagaacacgatacggtcagggaaagcgctgataaggcgttccatcgtgaacaggtcgcccgaggtgtacttgaatccggcgacgagcggatgctcgtagagcttcttcgattgctcgatatcgaaactcgtcccggtgagc
		gcttaccacctaaacactggcagcctaatcctgctggatgcgcaatacaacaaagtgattgaatttaaaactgcgctggaatctcagccgcagtaaacgcaacgccagcagcatccttggccgcgagcgtgggggtcatgccattcagcggccatgggatgtttaacgtttgatcgtcccacttgatggcgcgctcatgctctggggaccagtagtctgtggacttgtacagaaact
		cccgacggttgtggaagcgctagatagcttcaaggttggcgaggcgccgtcaaaccaacctctgcgtttccccgttcaggatgtctatcgtttcgacgagcggcgcattctggccggacgagtggagtcaggacgtttgagcgtgggggaccggattgttttctccccctctggaaagtcgagcacagttaagaccattgagcggtggcacgc
		aaccaccaaaaccagcgtgcatggcgccattaatatgctcggcctggcgaaacgggtgcgcgccaaaatcctgcaggcctccaccagcgaagtctatggcgatccccacgtccacccgcaacgcgaggactactgggggcatgtcaatcccattggcatccgctcctgttacgacgaaggcaagcggtgcgcggaaaccctgttctttgactatcaccgccagaaccaggtgc
		ggtgcgtttggctgccgccttgagtctgggcgagaaaccttggccgtagaaaatgttgtcgccgagcaccagggcgcagcggtcatcgccgatgaagtcttcgccgataaggaaggcctgggcgaggccctcgggacggggttgctcggcataggcgagggaaatgccgaagcgcgagccatcgcctagcagacggcggtagagcggaa
		aatattgcattgcagtttggttttttggctcacccccattttgtatgcccaatccatggtgccagcccggtatcagcagtatcttgctcttaaccccctgagtcatatatttgagtcttatcacgcgatatttctggcgcatgaagcacccaattggggagcgctcttggccccggttatttgtgcggcatcttgattgtcatcgctacgcgactctttaataagcatgct
		gtaatatgatctttaactactctgccttctagtgttgctgacacagcttttggttgttcaaaaatttctttttgcataaagtgtcgatactggcccttttctgcaacatcttgcaaaacagttaattgcgacttgttacgtttaactgttttcccagcaaagtcataaatatc
		taatcggcattatgttcaagcgcacagcgaatgccaaacattgttgccttcagcatagcccaggtttttccggtttcgataatagtcagcttagggtaatgtgctttgatttcattgcactgacccatcagtagagccgttgtccacaacaataatcctatgtggggaatattgttgtgattgtaaggaatgaagacaggacaatgtgtctgatttaccgttccagttgaggacaat
		gataccatcttccaccacaattggtcaagaatttgttgaaagtttttcggattaaaaggaaccgacatgcccgtgcaaaagtcgagtaaatgtgggcgtgaccacaaacaagggatggcaggatcaattgccctttggcatccacaatcgtcgcccccgagtcaacaaactcggacattttgccaacgcttagaatggtttcatcatatacgatgaagccgtcttcaatgtaattacaaaaaatcgtaaaat
		caatgcaccccacaatgatcctgttccaaaaaatacccttcttttcggaccatgttttcctgtggaacggcgcgaggatatcattgtagataatgctggcccaggtcagcatataggatgaatccgtggacatatccgctgccagcatggcggctatcatgatgcccatgactccgacaggcaggaaggttcccaggaattggggcatggcgtgaagcgtgttgtctcccaccagtgcgg
		aagattttagtttgcggagcaggtggattcatcggctctcatcttgtggaaagattgaaaaaagaaggacattatgtagttggtgc
		ctgaataatcccctttcactccagaaaaaacgcaatccgtactaatatgaataagtttactcccaacatctctggcaatatgagaaagcaggtgtggcagagcagaattgatccgtatggccttttctatattactgttcgattccttaataagaataccaatgcagttgattataaaatccggctcaacagattctataacctctctgagcaaaattgaatcactcacatccaatatatatgtttcag
		aaagaaaaataaggtaatttttttgtattgattgataaaatgattgagggttgattatttggtttgttgtatggattgataaaatgattggttggtcgattaattgataacttgattgattaattgttgattgattagttgagtaattgataagttgactggttgataagttgactgattgattagttgactgattgatttgttgactgattgattagttgactgattgattagttgactgattgattagttg
		tttcaaccggggcaattcacacaaccggtttgtgccctcggtgattgtaatcggtcgctcggtattttccctgacggttagacatggaatccccatatagctcgtttcttcctgcacaccgccggaatctgtcaccacgagacagctgttaagaccaggttcatgaaactgacatagctgagcggttcgagcagcagctagtcttcttcgtactcctacccgataaccgg
		ctgttacgccatccatctgtacttcgatttttccggctactccgacatggccatcggcatggcccacatgttcggtttcacgttcctggaaaacttccggtatcccttcatctcgcagtcgatccgcgaccactggacgcgctggcacatctccctgacgaactggttccgcgattacgtgtacatcccgctcggcggcaaccgcggctcagaggcgcgaacctacttcaacctcgtgatcatattcgt
		aagccttggcgaagcaaggcgagcaataaagagtgagcatattatatctaattggttgattgatattaagctagttaaagagatagggtatttcaatgaggcgatgtttccttatggaccaattgatttggattattgcgagagggccaacatagctaattttaatacttactatgtaatggattgcatggccgagcatatcggatcacatgcaacgggtaccgagtacggatgggataaagccgaga
		gcgcggcgatccaacgcgagagccgaggcgccggagaagacgtgtggctcgcgaagggcgtgggcgcgccgtcgatcatggtcgatcagctcggcatcacgcgcgccgcgggaagcgtgttctgcgggcaggtgcggtgggccaccttcggcgccgtcaccgacgcgaactcgcagccgcacgtcgtgcgctgcaagacgttcctctacggcgcccacaacggcaacgtcacc
		gcgcgcatcgactcctgctcccagatcgacgcgtcgccatcgatatagcgtccgacctcggggctgaggacgaagaagccaccgttgatccaggccccgtcgccacgcggcttctcgcgaaagccggtcacgcggtccacgctctcgtcgatctccagggcaccgaagcgcccgggaggctgcaccgcggtgaccgtgcccagcaggccgtggccgcgatggaactcgaagagcgctctgaggt
		tgcctgacgtacgcggcgctgtggcgcagcttgccttcgagcaggatgaaccacgcgccttcgatggcgtggccggggttgagcaggcggccgtcgaggtggtcgacgatctcgccgcccgggccgacgctctccatgcagcagcggaggccgggcttcatgaagtcgcggcggatctcctcgatagccgcgtcgatgcgcgcgttcgccccggcgtagccgatcg
		tgtgactctggccgttgtcggactcgggaagctcgggctgcccctggcgttgcttttggccgagtcgggccaagacgtgatgggcgtggacgtgagcccggaccacctggacaagatcaagcggggcgaagcaccccacgtcgaaccgcacctgtccgagatgctggcgcagcatggagggtcgatcgactggcggagtgaccccgagcgatgcggccgagtgcgaagtcgtcttcgnggttg
		ccgtcgcggatcagcgagctggcgcagccgacgggtgtcgcgacgaccgccgtgcgctgcgacatcgcctcgatcagcacgaggccgaacccttcataggtcgagggccacagcagcacgtcgtgctcgccgtaggcacgacgaacgacgtcctcgggcgcgcgatcgatgacgcgaatactggatcggaccctcgagtcgaatgcctcgagcaccatcgaggccggaacgccgggtccgagaa
		gctgctggaaaatcaccggttcgagttcatgcgccacgatgtgacctcgcccatcacgctggaggtggatcagatttaccacct
		caattatcccgttcccatatggttgacggtgtcgtaaaggcatggcacgttcataagacacagattgattggtggtatatggcaactgggacgatgaaggcagttgtgtatgatgcgcgccctgattcaccaacattcaaacaatgtgaagagtacattatgggtgaggggggtcaatcgattgtcctgaagattcctccaggtgtcgcccatggacttaaagtta
		gttacagcagctcagccattaggcagattcggctctttaaacattaagaaaacaagcgaggtggccggattcgtggaaaaaccaaagggtgacaacagctggatcaatggcggattctttgttatgcaaccagaagtttttgattaccttgcagaagatgacatcaatcttgaattgggggcactgcagaaacttgcgcgggaacatcagttcatggcttatcagcatgatggcttttggcaacccatgg
		gggcagataacgatattttaatatttgatgaggttcttgcggttggtgacgcaaatttccaagagaagtgcataaggcaattcaaaaagctaaaaaacaaggtaaaacgataatactagtttcacattctatggatatggtagaaaagttctgcaacagagtcattctgctgagctcaggtaaaatagaatatgatggcaatagtgacgaggcgataactagat
		tgcagcgcatcgctgatctggtgccccaccaccggcacgccgtcagccacggcgaacttcaccacgtcggtcaggtagtactcgccctgcgcgttctggttgtccagccgcgccagccagggcttgagcaggcgcgccggcacggccatgatgccgctgtagacctcgcggatggtccgctgcgcctcgctcgcgtccttgtgctccacga
		tcttgcgcacgtcatcggcgttcagccacatgactgttttgcgctcgttttgcaggtgctcaaggacgtgctgagccagagttgttttgccggaaccgggcaaacccatgatcagaatgcgcttcatgttcaacctttcattttgtagaacgcagggattgaaaattccggagctggtttgcgccagaactccttgcctgcgtacttttcccacaccgatttgggtaggatggtggggcgctcttgccacgtg
		tgccatttcgtttgcaaatcttggcgaacttgaaggataatgaatttcgtgtatcgtcacaatcggctttgaatgtagcaccaagaatgccaatcttctttacagcattaaacctgtcttgcttcttgatctgattaaacaagaattgtggcataccttcattgatcgtaaatgaattgcggattaactcatcatagtgaacagtttcgagtaagaacttaccatctttgaagagacacggtccaccaaca
		cgcggactccaccgccatttccagcagggcgtcgtcggtggcgtcggctgaggggatgcgcagcgcagacttgatctgcgacagcgatgcgtaaccgttggagattgccacggtttagcctccgatttcgtaatgcttccgcatccagtcgacggtgagcggcaagccctgggccagccgagttcggggaacgtgatgaagcaaggccttggccttggagatgtcgggcttcttgctggtgacgttgtg
		tctttattcagcatcaaaagaacttggtaaaatataactgaagatactattatagtttttgaatctacagtttaccctggtgttacagaagagtattgtgtgccaataatagaaagtattcaggactaaaatatggtattgattttcatgctggatactctccagaaaggaataaatcctggtgataaagttcatagtatagaaaatgtagttaaaaataatatctgctgataatgaaaagtcttt
		gcctacaatcaatatgtcacaaaatgccttcgcgtttcttaaaatagtttagatgagcgacatgaaataaatcaaatactccacacgtgtaacctattattttagacattataaaatattataatgtctaaatgtttatgtaccatattttatgttcttcaaaaatttctttatttttcccaactgtgt
		gtggtgccaagtgtccaaagtttaatgttgttggtaaagaagaaattaacaaccttgatctagcacagtatgttgccggtgccgaaggcaagaaactaaactatgaaatggtcgacttccattcttcacggccgggtcacgatcttcgttatggattgtccggtgaatatatgaaggaactcggatgggaacctaaatttactttgcgtgatcgtatcaaggaagttgttgattggtcacttg
		gatgttgaaagcggcagagcatgttcccgaaaagctgggtcttcggtacgaaaagcagcacggacgggttttttgcctctgacggctttttccataaacgctgtgatgtattctttatcgaagaacaggttatcgcgatagacaatcgtctgctcgcgcacaggcaccagacgctcccccttcttgagttcctgttcatgtgtcacgtacggcgcaagcaggtcgcgttgatgaagccagagcggcacattttg
		aaggttttcagcaaagctggccaatgtagcaaacagcatcgccagcattgcccagccgcccgtaaagacttttgatgcctttacatagtgttccggcgttgccgattgctttatagcacgtttataaatatcaactgttgttgtagaggccagtgcatttaattctccagccatcgatgacatggcagccgaaaacataac
		aggtcaaagtcgccgatgcggtcaaaagcggcacgaatctgccggtagtcgcctacgtcggcgcgcaccgtctgcgggaggccggtgtgctggagctcgatgccccagacgtcgtggccgcgttcacgcagctcggcgacgagggggcgtcctagggtgccggcagagccggtgacaacgatcttcatggcaggggccttccggtgcgcaggatgttccagaagcgggtgggctgctggctgagaatgtcgg
		atgatgttgccaaagcggaatataccgaaaacgtgttggatgtattaaaccatgccggtgtgcaggtgttatggcgaaataataacgaaggctgtaaaaatgtttgtaatcgggtcgagcatcaggatttatcgcatttaacgcttgctaatttatgcaatgcaagaatgttacgat
		tcatgccgctgtcggccggcttgaagacggcatcggcataaggagccacgccgtcggcgaacaccactttcttggccagcccgatggcgaagatcgccagacccgcggcgaagttggcgccgttgaatcggtagatcgccgggtcggcgaactgcggcatcatctgcgcgtggtgcagcaccgggcccgcgatcaggtgcgggaaataggtgacgaaaaggccatagtgaaccggctgcgcttctcgc
		tgattacttgatttgcggattacaaacggatcctactatcgataggccggatacaaagaacaagcctatccaaagcatcgtagagcgtcaaattcaactatcagctatacgctatgttgatgaggtagttatttaccaaactgaacaggatttggtagatttgctcttgacattacccctagattgtcgtatactgggtatagaatatgagaatgtagaattcactggtcgcaaagaatgcattgaccgag
		ggccgacgggtccatcacgcgaatccttgcgattgggcagggcacggcagctgtagcggcccgagcgctgcttgaaggccttgccgcctttgcaccgacttctccggtggcagtggaagcgattcttgcaactgaactcagcggttttcacctcgctgactccatggtcgacacattggtcgtcgccgtaagtcagtcgggcacaacaaccgacaccaaccgaactgttgatttggtgcgagcgcgcggtg
		gagaacttcctgggtgtatggtgatggcggtaatttcatcagaacgatgttgtgtttggctggtgagcgagatcaattgaaggttgttgcggatc
		tttgatcttttgagtacaatatcaatatctccgctgtcgccgccatcattccgcccttctgcaaaagcaagaatttgccctttggatgataccaaaatcgatgggatgcgatatcccttgtaatttccttctcctgctttccacaatattttctctgttactgttttggcaacagctatatgattgaataacagactcataacaagtatcgcaaagacgcttcgcatatacaggattactcttttca
		tcggcagccggatgccaaagagccgcgccaacccgatggccatgtccgtgtagccggagaagtcgaaatagagctgcaaggttataagcgagcgcgccaagccaggcttcggtcagaccgcagtgggcgtcgcccgcggccgccttgaaaatcggcgaggcaaaggttgccagccggtcggcgatcaaaaaccttctt
		ggccagtgaactcatgaacctcgggtccttgagtgacaaattattgtcttggtgcaacgcgttggtgggtcgtttcagaggcggcatgggccacgttaacgttgtgtcgtctctcattttttcaggcatgtcagggtcggccgttgctgat
		tggtaagattagcagcaggtcaattaagtcttgttctgtttgatagactacaacttcgtctacatatcgacaagcggctaattgtatctgtcgttctacaatactttgaataggtttattcttagtatcaggtcggtcaatagttggatctgtttgtagacctgcaattaggtaatcacagtgatttttagcctcactcaacatggctatatgaccagcgtgaagcatgtcaaaggta
		gtccttttataacttccaaatctagttgaaaagccttaaccagtttaactagtaattcgtatttactaacgctctcaccataaatatgaataagacctttaacgtctgttgccgcaagataaattagtttctgtgcaagtactgaagcagtaacaccactccaataagtttcatcatatcctaatactgtaccttgctgtttaagcagccacgcaagtagaccacgttcaccataa
		aaagatacctgtgatccaacactgtgtatcggaaatagaaaaagttaaaaatattcaattcgatacaatggttgatttagatgcaacatctccccttcgaaatgttcaagatattagaaatgtgatacatttgttagaaagtaaaaatatatcaaatgtaattaccgcaatgaaatcaa
		aaaatataataaaaattttaaacgaaataaataaaaatattttagttgttcttccgttacatccaggtacaaaaaagaaattagttgagtatgggctaggggacgcactagacaatttaaagataatagaacctctaggatatttcgattttctaaaacttatttccgaaagcaaaggagttgttactgactctggaggaatccaagaagaaactagctattt
		attaatatgttccttagctaataaagcagtacaagctgcaccttcagtaattccatcaacttctactattttacatcctggagtaattagatttaataatgtgtctagattgtatttttctctatgtttcttttgtacaatgtatatatagttagcgtctatatttaagttttcaataacaacctgtatcattggtttatttctaatctcaatcaatggtttaggaaaagtataaccagcttgttc
	Cell Wall & Capsule	cgtgcttgtactgttcgtgggtgccgtggaattcaagatgctcatgggtgacgttggtcatgacggcggcgtcgaagaggacgtcgccgagccggttggttttgggcgaaagcccatgggaagaggattcaacgacggcgtattccaggccgttgtcgcgcatttgggcgagcttccggtggacggtcgtggcc
		caaagctttcgagggattggtggatgaaattatcgacaccgacaatatgaaagaagcagtacgaaaagcatatcatttcggaaccgacggtgaagtagtgttgctatcaccatgctgcgcaagtttcgatttgtttgaaaactatgaacaacgtggaagattttttaaagaagctgtacgtgaattataatgagcggaattagtaaac
		atattttctgatcttcgctaaccactaatacttttggaactggcaatccttttgaatgaaaatgtgctgcgaaataaataaatgtttcgttctccctaatgttatggttaaaagtggcaatgtaagagtcaccgccttgtttgattctaaaataaaatacgatccccaccactttgaggaattttttcaagtgcatcccaagc
		catgcattaggttatccagtggttaaacatattgcaaactcgggtgctatttcaatggaaaataaattccatttaagcatggtccgcttaggaataagcttatacggagtaggagcaggtaaattagatacagtagtacagtttcatactactattgctcaaatacgaaaagtagcagctgctgaaacggtgggttatagtaggtcaggtaagctgtatagagacagtataa
		gctccaaccacttttgacagggctaaacgaacggccatttcagcggtaataccacctttaagataaataaactcaattaaattagcgagcacctcagtatcggtatcgcttataaactcataaccattcgctattaatttttcttttaatcgggcata
		cgtcgaggccgtcggtgaggttcaccgcattgctcatgcctacgatcatgaaatacgtgagcacgatgaacgacgcggcgcccatgggc
		cgattttaaatacgccgatttttcgtcacgcaaatgcaatcgcgtaaaaattccaagcactttcaaatgtctttgcaagcccattaaatcaaaccagcgtttaaagatttcaaagtcacaatcaacaacttttgcagtatgtaatttttcaaaataatcgcgtagccaactgtcgatttttttatcatccc
		taacacagcccatcggttttgcaagctcggcttcaattgctaattcaaactcatccgttaacttgccgccttcagcagagaagaatttaataccgttatcttgataggcattgtgtgatgctgaaataactactcctgcagataagcgcaacgccttagtcaggtaagcaacgccaggagtcggcattgggccacacaacatcacatcaacaccagcagcagcaaagccag
		tatccacagattgataagtgcttcaggaaatgccggtttaagatattcgctgtctttctgcagaccgtcaagaactgcattcagactgagcggaaacactttgccattgtgcgggttgtgataatcggtttcaagcggatctcttttctttttgatgccgtcaattcctgcaagcagcatggcactcaggaaataataaatatttgccgttgcatcacctgtcctgtattccattctttcttcg
		agtttatcttcttccgaaacccacttgcctatgattctttccaactctttcaggtgcggagtaagaat
		agcacaaccgcatgaacgcgcttgccgcgcttggcgcggcgcgccatgccggcgtgccggtggcgcagggtttggctgcattaagcaaattcctgaacgtgaagcggcgcatggaagtgcgcggcacggtcaacggcatcacagtgtacgacgacttcgcgcatcaccccaccgcgatcgacaccaccgtcgccgggctgcgccgcaaggccggcaatgcgcgcatcctcgcggtg
		gattcttcacaatgcatcgatttcagagggagataccctcccccggatgggggagggattgggtgggggcgagtcccatgcggcgcaaagcgcagcgccgaaggcgactgcgctcatcatggctggcggtaccggtggccacatcttcccgggtctggccgtggccgaggccctgcgcgccaggggttggcgtgtccactggctaggcaatgccagcggcatggaggccacgctggtgccgccgcgc
		gatgttttgaatcaacggaatgacaaaggggtagtgggtgcagcccagtacaaccgtgtcaatatttttttcaagcatgggattaagtgcatcttctaaaattcggcgcgtcacaggcgaatctaagtcccctttttcgatttgattcacaagtcccggacaagtgtgttggaacaactccacgcccgcgccgaatctctccacgacggaagcatac
		ggttgggtgcgcccgattcgatggagtcgcgcttggtgccgccgcaaggctttgccttggagacgattgaatttggcggcgtgcgcggcaaaggggctgaagaccttggcgctgctgccctaccgcttgctgaaagctttttggcaggcccgcgctgtggtgcgccgcgtgcaacccgatgtgttggtcggcttcggt
		tactccagctatggcaactctgcacgatggtccaacggtgacatttggcgagacgacaagcgctgacgtaagagcaaccgatatcgatatccgcgaaggtcgcccgcattttgacttagtcactccagctggaagagcaagtgttgcgctacgtcttgtcggaatccatcaagttgccaatgcacttgctgcggcagcgatcgccacaaatttaaanatttc
		gtttctctaaacgtgttctagaaggttcaaaaatttcatcatcagatcctgtaacatttatcccttttctacttaaagcgattgctaaattatgcatggcacttccgccaattgctatgaaatgtacattcatgaagttaaatttttatcaatttgattaaaatgttttctaaatttggtccctgagtttctttttgccaaactctttctgatgagggacttccattttttgaataggtaattgtactt
		gtgcggttgttgtcgcccatggccttccacaccggcgaccaggtggtgcccgatgcgcttcggctcgcggccaggcgcttgtaactgttgacggtgggcgcgcacagggcggagagggcgtcggcgtggtgcaacaggccggcggcgaactggtggcctgcggtgctcaggcccagcgcgccggtcgggtcggccatcacggcgtttccgttggcatccgtcaggctcaggtggaaatgc
		tcttgcattcctctggttcaatgtgccaccggcacgcttttacatgaccgagactggtgtcatggcgcttaccatgtcactcaccattgttgcatttatgactgactccatcggtggaggagagggcgtatcggtgcttcccgttattggcatccttcttgtactcacggtactctctgatgtacttcaactcctctcaaagaaaatccgcaagaaaaaacttttctgattgcgccgctccatca
		acgtttaagccaccatttttttaatatatggtaggttaagctggttgtggtagttttaccatttgaacctgtaatacctataatttttgcatccgtatacctgcccgcaaactctatctcggatatcacaggtatcttttttctcttttatttttttaattgataggcgctttatcgggtatccccggacttttaataacctccgccgctttaaaatttcggtttcggtatgctgctgttcctcaaagcggataccccaatcctgcaattgctttttataattatccgcaatagcgccaaaat
		tgcgataaagcaacctccatttccatttggggctaagaaaagttcgtcaatttctttattaattatccgcccttctaaatcaagtgctgggatggtatcttgaggaaaaattatcacattttcttttttaagatggaaataatttttctcttcaaaaaattcttttgtttctttatcattttctaagcttgtcattattaataatgttgattctcgcatt
		taattaccctgagatagtcaaggctagtcagacagctgttttgagcatacaggtcggtaaaaagactctacacttcaacaatactaatccaatcattgggaagcgtcataacttcattgttagtaagaccggaacgacaaatgcagccggtggctgcattgtgatgatgttggatacggatgttggtcgccgtatcgttattctgcttggtagtaagaacggtaaagttagaataccagaagcagaa
		gatcggggcctcgccggctgcgtacacctcggccacgacgagcgcgtcggaatccgccagcacctgcgcgaactcgtcgagcaggtcacgcgtgcgcgagtag
		tgctttcctcccatttggattcaaaggtgagtatcctgggtttaccaggaggcagggtataaacaatctcggatattgccgggaccattaactcggcgttacccatcacagtagtattaaattctcgtccgtccagaaactcttccaccagggcctggccgttaaagagcttgcaaatctttctgacttgcttctcc
		aacagatgacgctgtgcgaactgcttgaaaaattgccagagtctgagattcatggtgattcgtcggtcagcatcaccgggttgacctgcgactctcgcacagttcatcccggtgcgctcttttttgctctacgcggcactcaggcagatgggcattgctacatcaagcaggccgtggccgcaggagcagcggcggtaatacttga
		caccgcctggtcgaacgccgtcaatatcaccgatgggctcgacggactcgcgacaggcctcgtcatcatggcgataatagccttctcaatcctcacctacgtgagcggccgcgccgactgggccgactacctcaagattccctacgtgaagggagcgggcgagcttaccgtcttcaacctggccctgctcggcgcctgc
		gtaattttaaacatctacccaacacacttggatcatcacggcagttttgaaaattataaaaacgcaaaaatgagaattgattgctcaaaattttttttgacaaacaaaaatcttggttgtggaggtgctgttttttcaacagaagaaatattgcaaaatggcgtttccgttgttcgcggtgttgtttatagaaacggagattttgttgcaaatgatagcatttttgaaaataatttcaaataccacccagaaaaccttgccgccgttttgtctatttgttttgaaattggaattccagttga
		tgatgccgttgaccgtgccgcgcacttccatgcggcgctttacgttcttgaatccggccagcgccgccaagccttgcgccaccggcacgccggcatggcgcgccgcagccaaagcggccaacgcgttcatgcggttgtgctcgccgagcaggtcccattcgagtgtgccttgcggtacgtcgtccagtgtcacgcggccgtttgcgtcgatgtt
		ccaaatctacgatttcgggttcttccgccacattttcaatgatcgttgtaccttcggcaaggacagctgccatcataatgttctccgtcgcgccaacgcttggaaagtccagatatacattggcaccgatgagcttgtccgccttcgcctcaacatagccgtgaccctctacaatttcagcacctaacgcttgaaatccctttaaatggagattgatcggtctggcaccgatggcacatcccccg
		ggtaccagagccggcagaagatgccgagcaccttgaggtgccgctgcaggcccatcaggtcgaaggcgcgcaggaaggtcgcggcgtccacgctggtcaggccttcggcgaccaggcgctggcggtagtcctcgacccaggcgttcactcgcgcctcgggccaggcgatgtagcagtcgcgcagcagcgagaccaggtcgtaggtgatcgggccgcgcacggcgtcctggaaatcgatg
		ctggtttattgccgtgccggcgcactgtgcgacgatcaaccgtgaaatgcatctgcgtgccatctgcgcgcacattacttgcacggatatcggcatcttcagataggccgtagcgcaatatcggctgagatacaaatggaatgatgtcgcgtacatttgcatcatcaatacaaagcactgccacaccataaaacggcatacgctgaat
		agtaatgcgcttgcagtatggacagtattacttgctcaaggcatgagctgtgagcttgcctcgcaaaaagtcagtcaattaaatccggtacttgggcgcatggagttaattcagcttggcaagcctcaaaaaaacagaggggtttattggcggttgttgattacgcacacacgccagatgccttagagaaaactttgcaggctttgcgacctattgcagaccagcgtggtgg
		aaacaggcagcaacgccgcaggcagcaatctccgatacggtcattgcacccgaacggcatatgacgagatcggctgcagcataggcctctgccatgtcgccaataaaggcgcgaacatctgcagtaaccccgtaatcagcatagcgctgcttgagttcagcgacgtgtttttcacccgcctgatgcagcacctgaggtctttcctcagcaggcatcagcg
		tatacgattccatgtgttccttatctatatttgtaacgaccgcgatcgtcgggtagagcatcaggaacgaacgatcgctctcgtccgcttctgttacgaaccaatcggaacttcccaaacgggcatttgacccaagcgtatctacaacgccgccaacaaccgtggtgggatcgacccctgcatgccccaggatcgttgctatcatcgacgtggtcgatgttttgccg
		catggtttcggcgaggacgccgacggcgagatctacgcgctggcgaccaattcagcggcggatggggccggcggaattgattggttggtgtgggctgaggtggatgaggatgccgagttagaaaagccgaagcggcgacgtaaggtggcagccgtagaagccgaaccgattcgtttgaagcgtttaattccggcggatgcgttacgtattcgcggaaaacacaa
		ccgccggtgccgacagcgcgccgcccactgcaggagacaactgatgctgctgatgttggcacaatggctggggcaggacatccgcggcttcaacgtattcaattacatcacgctgcgcgcggtgctcgccgcgatgaccgcgctgatcatttccttcctcgccggaccgcgcgtgattcgctggctggcggccaagaaattggccaggcggtgcgcaacgacgggccgcag
		agttccggaagtttcaccacgttcgacatattcaacaaataatggacaagcaaccgaagtaatttgtaattgcggggccgcagcaaaagcatctagatatgctccggaatcaattgttgcatttgttccgattactccaattcggccacttctagttgcagatacagctcttcggacagctggttgaataacttcaa
		gcttacacgccgccgaaacctgcgatcgccttgcggatggcatcgtcggacaatccgagttcgtgcgcgaccgcaatcgcggcggtggcgttgagcgcgttgtgtcgtcccgccatcggcaaggcgagaccagcgatctcatgcgcgacttcggccttgcggtcgcggaacacgaccttgaagctcgaaccggtgcctaccggcaccagatcgaccaggcgcgcatcggcctgcggg
		ggcatattttcgtctatgagggcaatcggaccatgtttcatctcagcagcaggataaccttctgcatggatatatgaaatctctttaagcttaagggcgccttcaagagcaacaggaaacaaatagcctcttccgagataaagagcattggtactcttctgaaaaacttttgcaagctccagagccttttcatttaccatgagagccttttctatcttggcagggatcgctaccagttctgtaat
		tatccagagattgccctgacatcggcaagtgatcccgtcttgattcgtgcctcaggccttttctttaaatgcaaaaattttcgtaaatgtgccatgaggcgattacgcatcgtgccatctgtacctgcaatcggtaggctgttataaaaagtatctgctacaggtaagtttcgagctgcaaccaataattgcgtcatatgctcggcagagattgcttcgttgcgtgataggccggagccgtt
		gaccagcgccgccagcgcgatccacacatacggataccgcaggtccgcccagagcaacgttggaatcacg
		ttctgaaaggcgcgcgcgctgccggagctcccgaagagaagttgaagttcatgactgacgcaacggaggccggcgagttccttggccagacagtccggtccggagacgtgatcctcatcaaaggatcgcgaggcgtgaagctggagcgaacgatgaatactctgcgcgccagattcgcgagccaggagtcctgatgctgtataactttcttttcgagttcctgtatcagcggttcggcaagacca
		gttcggaatatccttgatctgccgaaaatgtatttgctccggatccatagatgaccttatacgctgattttagcgaactttgtacgccaaatgatctgaaagctgaatttatctttagatcaacaccatcattctccgcgccttgaagtatctgttttaggtgaggccacacatcaccatgtatcaaaagaggtctgcttttgtcagatagatattttgtatcgatatttgtaagttcagacggaaca
		tctgagtcgtttgtctattttgccgactccgcaaattgtccctatggctctaaggcaaaaagtaggattattcagctatcgtcgggaattaccgattttttaatctccaaaattgcaaggcaattgttgttgcctgtaatacagctaccgctggtgcaattgactggttgagggagcactacgacatcccgtttgttgggatggagcctgcagtaaaaccagcagcgcttaatccaaaaccaaa
		catgggtgctgaacaagagggctcctgggcaggggaatcaaaattctttgactcgattgacgaggctttcgaccatgttcgtggaatgcttgtggctggcgatttggttctggtcaagtcttctaaatctgccaatttgaggcacttgggcgacaaattgatggaggtaagttcgtgagagctattttgcttgcgggcggta
	Cell Wall of Mycobacteria	gtctgggcctcgcctcgcgcgagatcgtcatgctctccggcgacctggaagagtggctcggcctcacgctctccccggtgctgctctacgagcacccgtccatccgcgccctgtccgcgcacctggccggcctgaaaggtcatggcccagcgcccgcgcctgagagtgccgccgctgctccgccgcccaccaaccatgagccgatcgccatcattgggctggccgcgcgtctgcccggcg
	Gram Negative Cell Wall Components	cgtcgaactcgacgcggctcggcttgttcgggtgatcgacgtcgtaatcccagatgtgatcgagatgggcgaactcggcgccgatgcgg
		ccgacgacgaggccagtccgatgccggccggcaggtcggcgatggtggtgatctcgacccccttggtgacgtcggcgacccgcatcgcctcgcggatcagctcgtgctgcaggtccttcagccgggggacggatctcggtcttggtgtaggacacgcggatggtgtcgtcgaaccgtttgttgaccgtcacgtacatgtagcggtcgatcgccatcgtcagc
		aaaataccatctatttcttttatttcagcatggtgtatatgaccacaaataataccatcgaatccacgtttcttacaatatacaattaagttcttttcgaactcgaatataaagtctacagcagattttactttatgttttatataagcacttaaagaccaataaccaaatcccatcttatgtctaacccaattgaacttactattcaaattaagtataaggtcatatcctttatcgccaataaat
		atcacgcccgtagcgcaacccgccgcgggcagctacgacgccgtgatcctggccgtggcgcaccaccagtttgcagccatgggcgctgcccaaatccgcgccctgtgcaagccgcagcacgtgctctacgacctcaagtatgtttttcccgcagcagagtccgattt
		gcttggcagaaaaggtggcagcgccttgccacagattcaacagacccatgcgcgtcatatcctgattaaagtgactgaagtcacctccgaacctgaggcgcgccagaaaattaatcaggtccatagccgtctaaaaaatggtgaagacttcgctgcactcgccaaactatattcgcaggat
		tgcgcacggtcattgcacgccccacttgtcctgggcttttagaatcttctcaacaacatctcgaactgcccctcgtccaccgtgtcgcttagaaatgtaatgcgcgaccttcttgatctccgctgccgcgttcgctggcgctgccgcaaaaccgacgcgggacatgatctcaaaatcaggcaggtcatcaccaataaagcaaacctcgtcatccttgaccccaagagccttgaccatcttctcgtaagcg
		ctgcggctcatcaccggacagtcaacggccgaccgcggcagcgtgcacgtattcggttccgaggtctcgacgatgtcgacccgggacctgttcgcgctgcgccgacgcatgggcatgctgtttcagaacggcgcgctgctgacggatctcgacgtctacgagaacgtggcgttcccgttgcgtgagcacaccaacctgcccgaaccgctggtgcgccagttggtacttaccaaaactgcacgccgtggg
		ccatcgcctaaggctccgagatttttcccgggataaaactaaaagctccggcatcgcctaaattgccaacttttttttgcgatgattcc
		tctctttgtggtgtctctagtaccttaccgaaaagctctgaagtcgatgcctgatagactttggctgtgtagcaagtctgtcgagcagcctcaaggacatttagtgtaccgacagcgtcaacctgagcggtatatcccggcaactcaaaagataccttgacatggctctgagcggccaagttgtagatttcatgcggacctacgtcactcatgattttatgaacactcagcgcatcag
		tcagtgtttcatttggtgcgataaagcttgtttgaggatatgattgagccgctaaatgaaatacataattcggttttgaaatacgcacagcattaatcatagatgtcaaatcattcaaatcaccatatatcaattcaattctatcttttttattaattctattagatagatgttctatattttctaagttatcattccatctacaaaatccatagattttccaatctgtattttctaataag
		gcatcttttcggtcatttaccattggttctccgcgaatatttaaacttgtattgagcaatattgggcaacctgtcaatacataccatttctctaataactctcttattccagatccatctttcggaacagtctgtaccctagaagtcccgtcagcgtgaacgatagcaggaaataagtcaggatgcctacacctagcgatgacttgcatatacctactgttattgaagccacgaggcatatcaaaataactat
		gcctggtgcgcgccagcgccggcgacatcaccatcgacggcgagtcggtcgagcacatgcccatccaccgccgagcgcgcctgggcctgagctacctgccgcaggaagcgtccatcttccgcaagctcaatgtggaagacaacgtgcgcgccgtgctggagctgcagcacgacgaggccggcaagccgctgtccaaggacgagatcgagcgccgccttaccggcctg
		gcaacgatcagcgaggcgcccagtgcgcgggcttgcgccagataagtcacatggccacgatgcagaatatcaaaacagccattggtaaaaaccagcgggcggggtaattcggcaacgcgtttggccaaatcttccgggcggaccagtttgtgctcgaagtcgggcagtggcagatcagtcacgatactcatgggcttcaggcggtagccagagacttgcggaagcggttgaggtcctgcaccgtctcg
		cctgtctatcgtttctcggagcaggccaagaccgatggtgtgattaagattttcaagggttctcagaatacctatcgtgactttgtatgggttggtgacattgttgatatcattactaccaatgcggagtcgggcatctttgatctaggttgttcccatcctatttcattcctagatgtagctgagattgttgctgataagtatgatgtaccaatcaagtttattgacatgcctgaaatca
		gccagttaccagtagcagcaggtttgctaactctaaatccatgtaactttacagcatcacaatcctttagcgaggatggcggacttttaagaaagacaacatcactttcaaagataccaattggctctttcatttctaaacacttcttccaaagagcatagtgactcataaagcaaccacgcacacctgatc
		atcaagtggccgatgtcgcattgcccgaaaaatttcaaggactgcttttgcagcgaatcgaagagctggtcgcgcaggtcgcgcaccacgcacgcgccgacccaccgcatgtagtactggttgatgaaggaggagacgatccgcagcaacgccacgatggggaggcccagcaaccccaggaacagggcctgccacgtcagcgtattgtcggcgttgcgcagcgggatgttgaagcgcgcgg
		aatgtgctgatttctggtagatacaaataatcaatatcacagtttgcgatagtatgaaatgcatcttcgagtgattccactaacggctcacctgctaggttaaagctggtattaaacaataccggcacacctgttagtttatcaaactcactgatcaattcatagtaaaacggattgtcgttggccttgactgtttgtacacggcatgttccgtctacgtgc
		aaaacgatattcatcggtacaataatcaccgattagcaatatcttgaattgtttttgtggtggagtagtctttgtatctgtcatagtaaatcacttgtttagcatacttttcgccaagaacagacttacctatgtagtcggatcctttgacgagaatatcacaattctgaatcaagtcaatcaattcatcatcggtatcaaagattttcacatcatctactgatttaagattgtttagc
		ggttcagtattctgcttactgactacaacaggctcatgattaatgacagccttttaccctatggaagactccgtgaaaaagtttcaggaatgagaagagctgatttaataattgtaacgaaatgtcctgaggattttaagccctattgaccgcaggctga
		cgagctcgcgctcgtcgcgcttcgcatcggtccgggtgacgaggtcatctgtccgtccctcacgatcgtctcgtgcgctcgagcgattctcgccgtcggcgcgacgcccgtcttcgtggacgtcgaggagcgtagcttcggcctcgatgtgggcgccgcgatggcacgggtagggccgcgaacgcgagc
		gaccggaactgaccgctggctgtattcggctcagcattttcagtcttttggggcggggttctggggcaacgttaacttgaaccgtgtctctgacggcgcttacttcaaggatttttctacagttgccgtcaatcaagccccaacggtctatcttcccaacactggaaccttgggatggtccaacaagtactggaatgcgaatgcc
		tgccatcatgaagatgccgtcagtttccatggtgtcagagcaagccccttcatgaaacaccgccctgaccttgccaaagcgaccacttctaaatgcttccagaaattcgtctttatcaaggtaatcaatgatgtctaaatctgctagattgcgatacttatcagcgggacgtaaatcatcgaccgcaataatatttttctcgccacgcgcattgagcgcttgaacaatattggcgcc
		tgtgccagaagccgccgatagccgtcatctatggccgggtctttcaaagcctgccgcacaaccatatggtgaacgaggatagaaaggagtcgtctctctttgtggtgtctcctgaacaagaccgaacatttcagacgttgatgcttgatagaactttggattatgacccgccatctttaacttac
		cagagtcttgctctcgcttagaagacattcagcatcctgcggtgcgggagggggcttcaattccttggtttaaaacaaggcatcgagctacaccatgatggagatttgccggcacggagcgggatgggatcgagttcttcttttgcagtagggttaatgcaaattttgcatgccctagaaaacaaaatggctagcaaagatcagcttgcaaaagaagccattcacttagaacaaaatcttctacaag
		gcctgtttcagtgcatccaaaacggcataccggtcaggggatttgccgcgatcgcccaggctcgctgtgtagccagaacccactaaaggtgtgcgtacaggagtagaggctttatagatacctatcgtgggtcgacccaacgccgcagacaaatgcgtcaagccactatccaagccaaccatcacatgcgcggcagccaatacaggcgcaatatcctgcagccccaggcgcggcaataccg
		tcaccgcattgctggctacagccagcttgcccgggagggagacggtataggccatcttgccaaaaaaaggtgcccaaaccccatcccctctgctgggcacttggtcgggcagcatgccaacggctcgtttttcacgaaggatgcgataaaaagaccgcacgcctttca
		cagcatctattttgattctggtcctggtatatgccttgttgtggtttggcaccctcaactaccgtcacctcattccatctgacgaagggcgttatgccgagattgctcgcgagatgctcgttactggagattgggtcacccctcgctacaacggttacaagtattttgaaaagccccccttacaaatttgggccacagccactgccttcaatctttttggcattggtgattggcaagcgcgcttgtgg
		gatctcggagatcaccaccagcacgggtaataccagaaaacaggccaacattctcgggacaaccagatattccagcggatcgacacccagagtccgcagggccagaacctgattattcacgcccatcgtggccagttcagaagccatgccggcgcccgccttgccggaaaaaaccagtgccgtaaagatcggactaagttcccggaccagcgataacgccaccagctgcgcaat
		agtttattagccttaatacaggcgtcgtatatatgttcgcctttagctagataataagtcataacagaaataaaaacatctcctgctccagtcacatctgatacttctttatctataccgggcaattctctgatgccctcttctgaaactatgatcggtcctctgttacctcttgtaatgacaaaagcttttatattataaaattttcttgtgtcc
		ggtgctcgcccggagacggcgacagacctcgagaccgtcgatgcccggcatcatcaggtccagcaccaccaggtcggcggggtccgcacgcatcacccgcagtgcctcgccgccgtcggctgcctccaggaccgcgtgaccgccggcgcgcaggtaggacacgaccacctcccggacggtcacgtcgtcatcgacgacca
		taagaaaaaagtttggtatgctccaaataagtttgaatcttatggagaagaagaaattaaggcagtagaacaatgtcttcgtgatggatggattgcggggtttggtcctcgttctatcgaatttgaaaatatagttgctaaatacttcggaaaaaaatatggagtatttgtaaactcaggatcatctgcatgtttattggcattagcttgtttgaaattaccaaagggaagtgaggtagtaactcctgc
		tgggcagtggtatatggaatgtaggttctggattatcacattctttcctagacattgcagaagctatcgcagaacaagaaggtgtagaaatacgtactatacctatgccggaagctgaacgttcacgcttccgtcaaaagacctgtgctaaccttaagcatctaaaagctacaataggcaagcgcaagtggctaaatgtatatgaatggttagatctagaatgaagacagtaatggttaacggaacattcga
		tgattaatattaaagtcggcatcaaagatgcgcgtgtcttagtcctcggaatcaccttcaaagagaatgttcccgatatccgtaattcgaaagtcgttaacattatcgacgagttgaaagagttcgggattaatgttgatgtatgggatccgtgcggggatccggatgaggttttccatgaatacggcattcgtcttgttgcgaaaccggagaaggcaacatatgacggtgttgtgct
		aataatttcagtaatatcgggattgccgtggagcatgtctaccttcccgtgataacctagaaaatgaaattctgcatccggccaaagctctcgcgccttgctaatgaggggagttgtcaccaatacatccccaatttgcctagtggcaataaacaatacctttttgggtttgagttcagagaatgcgctcatattggaagtattcaatatattaaatggccttagccagtattttttcacgaacacgccggg
		gaaagataaacaagctgttctgaataagttcaatgctataggattgcgcgatgctagaataactttcgacacgatttatcgctctggaaataaaaatttatttatccaaatgaacattgaagaaggagggaaatactacttcggagaaataaattggatgggtaattcaaagtttagaagcacttacctc
		ggtagcgccgcgtttttgggcaggggtgatttccatgcctatactcgcttctattttttccatggtcggtatacttggcggctacttggttgcagtgccattgataggtgtggacgacggggcattttggtcgcaaatgcaggccaacgtagattttagtgctgacattgtcaatggtgtgattaaaagtctggtatttggtgtggtgtgcaccatgatcgctttgtttgaagggtttgatgcccc
		ttcaacactcaagcctgctgagattcttgacgagatcggaagggagcaccgggacagcgataacaagatcaagaatcctgatgttctggtcgagattatttcagctgaaaaatcacgcgggaaaaagattgtctttacgaacggttgttttgacctgcttcatgtcggacatgttaaatatctgcaaaaagcgcgctcatttggtgatctcctgattcttggcctgaacagcgacgcctccataaagcg
		tgaatccaacaatcatgccctacatgactatgctttaacatccacacgccatcacttatcatggttggtgtaccgcccgtgcttgcatcaatggtaacatggcctgtcaaggttacattatcaccaatctcaacattgccggttggcttatcccaatatgctttatgctcggcgggatatccaataatgcaatatggtccaatgtaacaattctctcctataattacgttaggccctat
		ggttgcaggaaatgtaaaatcggataccaacacctcatcatctggttttatcccactaacaaccagagcaagatgcaaagcggttgtgcatgaactcattgcaaaagcatgccggcaaccaatatactgggcaatttttttttcaaattcggctgtaaccggtccctgtgttaaatagccagttgataatacttttgcaatttcttccaattcac
		tctaagaatattaggtgatgatccagatgatgaaattgctatggcaatgccagaaaggtcttcactcatttctatttgtttggcaaatacttcatcatatgaaaaaatcattagcaatagcagtcaataaagacatattatttgctagattttccattcttggtactaaatgtgtatcttgtctaataccttttgtatggtcacaagaccaat
		cgccaggcggtgtcgaagttgtagatctgcacatgcggcaggcccagcgccacggccatgtggctcagtccgctgtcgaccccgatcacaccggcacagccggccagcgcatcggtcagcgcatcgagcgccagccgcggccagaccaccgcatgcgccatttcgcgcgccatggcttcgctacgctgctgttccgcatcggtgccgtgcagcagcg
		gatatcttcaggcaaaagaactgcttcggcctgataatctttatacattttatctatttctgaaaatttggtttcaatttctttttgccattcaagtgataatttatcaagtatttcctgagcatcacgatactctgacatgttttccaggatatattcagtatcaacatatgcaaactttgtgcatttgaactgaaagaaaacaatgtaatgataataactaaaacaaaaaactttttca
		gcatcgcagacacgatcgacgtcactgtcctgcatcgccgggaacagcggcagcgtgacggtttcgcggccgatgcgctccgcgttcggaaaatcgccttccgcgtagccaagtccgcggtaatggctgaacaggtggatggccgggtaatgcacgcccacgccgatgccccgctccttcatcagcgcgatgaagcccgcgcggtcgatcgaaagccgggacaggtccagcagcggcgcg
		cagggcgtagtgctgcaagccgtcgtcgctcaccagcacatcggtttgcggataggcctgcagcagggcgcgcgcggcttcgatgcggcgcttggccacgaagaccggcacaccggtgttgcgccggatcagggccggttcgtcaccgacgtcgtgcacggggctgtcgtcctgcacctcgcggcagtcctgcgtgcggcggccgtaaccgcgcgagacc
		atgaaaacaggttttgcattgcacatccttattgaatttgctgttgcagcgaatgtgaaaggaacggtgatcacttcatctccttcttttattcctaaagcgaagagagcagtgtgaagtgctgttgttccgttggagacggcaatcccgtgatggccggtaatatcggaaaacatcttttcaagttcatcgactttctttccttgagccaattgaccagtcttcataacagcgattaccgcatcagttt
		taaacgacactcccttcgaaattatagaagcactaaagccagacgttttagtaaaaggggccgattatgatccaaatgaaacggatacaagttctaaaaaatacattgttggttcagatattgtaaaaaaatatgggggaacagttgaagctatttctctagttgatggattttctactaccggaattattaaaaaaatgaaaggtcaataaatttataatcagattaaatttatttgta
		tgttgcctccgagaccattcaaggctatcgggttgtgcgtagttttggtggtgaggcgtatgagcaaggccgtttctacaaggccagttcagataatagtcagaaacagcttcggatggtgaaaaccaacgccgtgtatacgcctagtctgcaattggt
		atgtaaccggtaatcatgatgagatgttacggaagtttaaaggtttccaattgggaactcttgaaattgtgaataaactggtattaacccttgacgacaaaaaagcatggatatttcatggcgatgttttcgacaattcggtaaaccactcaaaatggttagccaa
		gattgcaggatgccaggcggggatttgcgcaaacgcatcttccgccagccaatcaatctgtgcaccaggcacatggcgagcaatatcggaaacagccggcagcatatgcaccaggtcacctagtgacgatgtgcggacgatgagaatttttttagtcatggtcaatcagctagctttcaaagccgacaatacctcatcgacacctgattgccacgacgg
		tgacccgcaagatcaccttggccgctgcgcgtatcgcgcagggcaaacaagataaattgtacctcggtaatctctcgtcgctgcgcgactggggttacgccaaggactatgtggagtgcatgtggctcatcctgcagcacgagacgccagaggacttcgtcatcgccacgggtgagcagcactcggtgcgcgagttctgcgacttggccttcaaggaggtgggtatcaccctggagttcc
		aggtgaaggcgcgcttctgtgtaccgccgtcgaccaggctgatcggctcaccacggacgatgtggccgaggaattgggacaccacgcgcgacgaacctt
		aagttcattgaggcggggatacttttggtcgcgcgccagcacatggatcggagaaccaagaagtccggacaccacctgcagaagttcccagttcccgaaatggccggtgatcaaaacaccgccgtgcccggaatcccggagctgttggaaccgttcgatatggtggatcgtgatgttcttgtcgatatcttcgcgcttcaatttcc
		gaatactgggaagcctacaacggcatcgttaacccgatccaaaagcctgagcatcaccatccggcgctgaacctcatcaagatcaccgaccactacctaacccgtggcgaagtggcctgtgctttatctcatatcagcctgtgggttaagtgcatagaagaagaccagcctctggttattcttgagcatgactcggtgatggttcaaccgtatactcagcacgctgtttataactctatctgct
		caccgcttggctgccttccggctcgtagggaagcgacagcactccggccttcgtcaacggctcgagcagatcgtggtagcgccgcgccgccgcctggcgctgggccgtccattcgtcgagatgacgcaatttgatgcgtaagaacgccgcctgaatcgcgtccagccgtccgttatagccctcgatctggtggtagtactttttcgactggccgtgatcgcgaatcatacgaatcgt
		gtggtggtcatggaaaacgaggttcggaagaacacccaaggcaaggttgagtacattgatgccaaatacgagctcctgaagcggggtcagtacaccctgaacatgagttccacagagccgatggtgatggatgatgaaacaccctttgctgtctaccaggcgcgcaatgcggtgcgcatcgcccaggcaacgggcgcatcaatattcgcacctgaggcccttggcaaggctcagaaattcctcg
		aaaaaattaatgcttctatcccatgtccattgttttacagtttctaacccgtttttaattagtttttgcttaagatcattatctctcattaatctttgtattgcttttgttgcaccagaaatatctctagcttctataacaagagcattgctttcatcaattatatactcatcataaccagtacactttgctacaacaacagcacattcacatgccattgcttccattggtggtccaaaaaaaaccttct
		gattatgatcgtcaggtgggtgagaccaagaatgccaccctctatttccagaacacaccgatcttctggtcgccgacgctctccttttcactgaacaatcagcgcaaatccggtttcctggcgccgaccttcggctccagcagcgtgaacggcttttccttgtcgacgccgtactactggaatatcgcaccacacatggatgcgaccatttcgcccagggtttatgccaagcgcggtcagcagatggcctcgg
		cgactatattgaaaagatgattttcttaagttagttgaagaaaacaaatttaaggaatttaaaacaatatttcatataggagcatgctcttctacaactggagaaaatgcctcttattacataaagaataattacgagtacacaaggaaactagcc
		ctagctgaacgattacagcaattaggctggagacccggaatcattagtagaggatatggctcttcatcgcaaaccaccccattggaagttagcagccattctgatccaaccttagttggcgatgagccagtactcattgcaaaacgcactcatgatcagtttccgatttgggtttttccaaaacgccagaaaagtattcaggctttgctaaaacactcccccaatgtcaatgtgatcattagtg
		gggccttctgggtgaatacatcggccgcatctacgaacaggtgcgcggtcgtccgcgctttgtt
		tgcaaaagactatgtgagagcaatgtacttaatgctccaacaagaacagccggatgattatgttattgcaacgggtataactacttctatcagggattttattagattagccagtctggaaattggcctagaaattattttcaatggtgagggcattaatgaaaaaggttatatagtgtcggttgataaaaacctgttcagtcaaaaggtagggagaaatatgttacccatattcaaacggttataaaaac
		gcgcacacaccaccatcggccccaaaacccgtctagggcgacacagccacgtcaacggaaacgtcttcattacacgcgcgcaaatcggcgacttcgtcaccatcggaccaggagccacaatctgtggggacgtcaccatcggagccggcagccaaatcggagccggcgctgtcatctccaacctcgccaacctcggccctcgagtaacgataggcgccggaacagtcgttct
		ataacgaccacagtggcggcatgaatgctgtgctggcacaaatgccagtgggttggtttgcaagtgcattgcccgatgatgttcaggtgttgactgtcgcgaaaaagatgccttgttatgcagaccagcattgggcttgggatggtgtagattttgaaatgctgcacccacaactggcaa
		atgctttcaaatcctgtatgtctaacatacctacaggcttgttgttgtcggtagccagaattgtgtctactttcattttcttaaagatagctgctgcatcattcagcagtgcattcacttctatgctgataggtgttttgtactccaagctacctattttttgtctagtatgtgctcaccatcattttgcaataatctgcgaaggtctccatctgtaaacacacctgcaactt
		gcaaaaagacgcgtccgccagccacgaagggggccgtgaaagcctgcgccttcaggctctgacgccagacttcccgaccttgctgcaaagcaatcaactggttggactgcgtgaccacagccgtcaactgaccatcactgcccacgccggcggcgagttttgtgccaaggtctgcgcgccagagttcgcgtccggtcgccgcatccagcgaagtcaccaggccgctgctgctggccagggtgagtcg
		agttggtcaaagaaaaggcgattgagtacattccatttccagatgcactcaaaggcaagtaccagtgctttacgcaagcggatttaaccaagctacgcgcggctggatactcagaacccttcctgaatgtggagcagggtgttggccgctatattgaatggctagaagcaaacattgattttttggctaacncngagaat
		tgggcgggcggttttgctcattggcgtatgagcgatgccttgccggttgagtgggaggggcgcgatgtcgaggtggttggcgtggt
		acaaattcatcgcatggaataccaaacttctcaatcgtatcaagtgttagtttaccaatatcagcgatgcatttaccgacattgccatgatgggtcttcattcttcgtgccgtgtaaataataatagtatgaccatgtcgtttcaggtgttggcagattcgaatattactcataattggttctaccgtcgagtagtctcctttgacgcgtggatatgtgaccaatgtaccatcaaggtcaaaacat
		atggccgatctgcgcgacgatgccgagcgcgtgatgaaaaagaacttccccaacagcgagtattacaagcgcggcctgaacaaggacgtgccgtggtggaagctctggtaggttcttaacgccgctggcggcgtgcttcaaacaggcagatcccgctcgccactgatacgttgaggctttccaccgatccatacatcggtatgcgcgcgagttcgtcgcacgtctcgcgcgtcagccggcgcag
		tgcgcgaagacgcgcctcccaacattttctagatagcaattgcggtaaagcaagaggctgagaaagtagttgcctgactctgttgctttaggcgtagttggcgatggtggaatgtttgcgcgctggcggtaaggtcatggcttgtggcaatggcggctcagctgctgatgctcaacactttgccgctgagttaattggtcggtttgaaagagagcgccaagagttggcggcgattg
		aaagtttctatgaagttgcgaaagaaattgacgcaccgattgattatattccgatgccatctaacttgaataattcataccaaaaatacacatgtgcagacttgacaaaattaaataaaacgttagagagatttaacgcatagaatgtctattgaactcattgaatatagagataaatcgtatccagcacttcagacaaaaggtaatgctgcacaatttgcaataccgtatgcaaaaacatttctgtaaaggta
		ccacgtgcccgagcggctgctgcacggtctggcgatggtcctcggcgacctgacgttgtggtgctacccgcggcgcagccggttggttttctcgaatctgcaccacgccttccccgaccgccctcagacctggcaccggcgtatcgcccgcgagagttcccgtcgcctgttcgagaccgccctgctctcgctggcgatgccgtgcctgagcgccgaccgcctgcgccgcatcgtgcgggccgccccggggca
		tgatgacacacaacactgcaattgccggaacgattgcagtgatacaaatgacaacgaatacgttactatattatgtacatgagagaatatggaccaaaataaaaatgaagtgagagtctttgtgaatggttcatttgacattgttcattatggacacttaaatatgctggaaactgccaagcaatttggcgacaaccttatggtagcaatagattcgaacagaagaattgctgagaagaaagg
		taccaagctgaaaggtactattaacagaagaaatgaaaaagaaaaagaagacgccattatagcgaaagaaaaagatgtaaaagaattacaaaaaagtattttggccaagatggtgctttgtttaaaaaacgcgaagaacttgtaaaacctattcaggatgaaatataccgggcagttaaagaaatgtc
		ccgaccagcaaatccacttcggtggggcgcaaataatctgaatcggtcaccacatgcttgcgccagtccaaccctgcaagggcgaaagtttcctccacaaattcacccacgctatgcgtttcacccgtggcgatcacaaaatctgccggctcgtccggctgcaacatgcgccacatcgcttccacatattcaggcgcataaccccagtcccgctttgcatcgagattgcccagagtcagtttgt
		aacaaaggctaagtcatagcgctggaagatcttgcagaataaacgccagtattctgcaaaccctggatgatcggatgtttcaatccactcctggatatgaggattgcctttgagcatatccaacttgccgcgataacctaggaagtgaaattcagcatctggccataatgcgcgagctttacaattaaaggcgttgtgatgagaacatcaccaatttgacgggtggcaataaag
		gattttaaattctcaacaacattacccgacatacctttgttttctgtcatctcaattggagtcaatatgggtacaggtgcttcaggtgacaatcgttttgtctctacataaataaacctatctaaacacgactcacctattactattattctcatacttcaatatttttgttgtactgtaatttggtagtttttcataaaatactaattctttcgcatgttcactaccataaacaatttcatttctataa
		gattacctttaccccggaaacgtctcctgaagaacactggagatatcccccatcttttcctgccccattttggagagccgcttgatccgcttcccgatcagctg
		ttgtagaatgtccatcaatatatggaataatgataacttcagctagatcattaccaacaacatcttcgactttataatcaccacccttcgtgatgatgtcgggcttaatctctttgattagattgtatggtgtatcttcgtcaaatataacaacttcatcaacaaactctaagctttcaagcaac
		atttattttttaatacccaaagatcgaacatgtgctttgagtaaccgtacatgttaagaggttttaagttggatgatatagaatcttcatctgaaaagccgatctcaccatcgccataagttgcagcggaggatgcataaaggaattttgtgttgttctttaaagcaaattcagcaagttttctggtgtattcatagtttgtcttaatatatgaagatgcatc
		gatttgcaagcgaccaatctcctcgaccaaattcagcccatcactcggcttcgtttatgggtcatgttgttcctgttcatacgggagcagaaatgctggcgaaacgtttcgatatgaatgtgatttttttaagagtaaagaaagtaaaaagaggctattatgaagctagttttgaagtgctttcagataatgttcaatc
		aatccaaaaattaatcctgatcaacaatcttcaagacagaagtttacaatttttaataagtatgctgtagagattagatatcctttaagcttagctgcaagtagtactatttatgcattgggcttttttgaagcagccaatggttggtacagtatgaaa
	Gram Positive Cell Wall Components	tcatatcccaaattaagttcttgagccatccacctaagtgcaatattatctcgaggatgacatgctcctgcatctcccattccggctgttagatattttggtcctgttattctttgtgttgctgcttttagtgcatctgtaacaacatcgacattcatatgtcctataacttcagcaacgtcttgtatcatattaac
		ggttgtttttgtctacgggtgtaggtactgttacaatgtatatattggcatcttgaatgtctgataaattagaggaacaatagagtccattttgagatcctgaaacaagttcaggatgacaagcaaagggattttcgtttactaaaaccgcttgcaatatttcgtcagaaacttctaaagtactatcagtacctgatcgtaattcttgaatacgattttgattgatgtcaaat
		cacaacatcgacaatgtctcggccaaggcgcttcagcggcgtaccgtgccaggtttgaatgtaggtttgtccggcacgctttct
		tcacaagaagaatatagtagttttgatatttctgatagcagagtaaaacttattaatttagataaagagacgaatagtaggacagtatgtgggtttccatcagttggttatgtaagaactataggaatgaagaattctacaggtcagtatatagcattcttagatgatgatgatatatggctaccaaataaattagaattacagctaaaagttatgaaactaacagggtgtaaaatatgtt
		gggcaagaacaccggcagcaggctggtccagccgggtatctcgatcaaatccagggttgccagcaggcccgcccctaccatcaccggtaccgacatcaagaacgagaagcgcgctgcttcggcgcgctgcagaccgcgcagcatgccgccggcgatggaactgcccgagcgcgagacgccggggaagatcgccgccgcctggaacaggccaatcaccactgcatccacccaggttaagtcg
		taaatgcttagcgcaatctttcttggtttgattcaagggcttaccgaattcttgcctatctcttccaacgctcacttagcgatcatcggtcgcttgat
		tcatcgtcgtcatccagttcggggcgattgctgcggttgcagtggcgtgttggtcccaactgttatccatgctccggggactatttggccgcgatcccgcaggccttcggcttctagtgaacgtcatcatcgcgttcctgcccgcagcggcgatcggatatgccgtgcacgatttcatcgaagaacagctgttctcgatcagcaccgtcatctttgcccaagtcgcgggcgcgtt
		agatccgttaaaattaaattcatcaatatagcgccccactggccagaaccagcgatggcaccataaatgcaacggtgattttgttctcttcaagtatgcgaaaggtgtcgagaaatttcatttttcccgaaggcaccgtatgcacgcttgcccccgttatcagcggcaaaacaaaggatgccaccgaaacatcaaaggtgagatcgaacatttgcagaaagcgatcgctggccgaaagcgta
		ccgatcataatggcaacaacatcaacgtctttgataaagtcaaaatcggtggtgaacaatagtcgttctttatttagattgtcacggagtatatcttccgcaccttcttctacataaggtactacaccattattcaataaatctactgcggtctggttcacatcgataccataaactgtgtgaccggcatttgctaccacacaagagaat
		cgtttaatcgtcgcactgaccgaattattgtgatggatgtgcgctcggctgaacttaccaaatacgcagcaaatgcgatgctagcaacaaaaattagttttatgaatgaactcgccaatttggcggaatacttaggtgcagacattgaacaagtgcgacatggcatcggttctgatacgcgaattggtcacagttttatttatgcaggctgtggttatggcggctcgtgcttt
		gacagacgaagcatgacggcaccgtcgagcatctcgtcttcaccgacaacaaggcgcggtcaatcggactgaagcggcaggcgttgctggacatcgctcgcggcgactacatcgcctttgtggacgatgacgacgcgatcctcggtggctacatcaacgcaatcctcgatgccgccaaaggcaagccggatgtgatcacattccggcagcgagcgatctacaacgg
	Multi-Enzyme Complex	acaaatatttacttacagcaacaggtcgttttgatggtgcatctgttctagccttaggacacaaatgggactttttcccttcagtagcgtttagcatggaaaatgcaggaagaacgctttattaagccgataaaatggatcagtgaattaaaacttcg
		cataccttcagttctttttacgtaatagttaaaagaagctctgtatctgttttttgccaatccaatatcgaatcctatatttgattgtttctgattttgccattttagattaggatttccataacccatgatatttgcagctattatagtgtaatatagtctgttgatatcaaaggaataagaggtctttgcctgatatgcgctgaactcctgatttccggtta
		acaaatatttacttacagcaacaggtcgttttgatggtgcatctgttctagccttaggacacaaatgggactttttcccttcagtagcgtttagcatggaaaatgcaggaagaacgcttattaagccgataaaatggatcagtgaattaaaacttcgtttgggttttggtgcaacgggtaatcaagcaataggaccatata
		accattagtgaagaaaattttgttaacgataatctgccctttgtagattatttgaaattaagagcttcctacggagaaaacggaaacccgtccatcgggcaatatgcaacgttcccgtctatcggttcaagttcttacctgtttgggaacagcacggtaaacaccacttctgctgcaaaactggcaaacaaggctttaaaatgggaaaaaaccggagcacttaactttggcgctgatttttcta

## Sheet: Cell Division & Cell Cycle
Subsystem Hierarchy 1	Subsystem Hierarchy 2	Sequences
Cell Division & Cell Cylcle	Cell Division & Cell Cylcle	gcaatggccaagcgcacaccagtgaacgcaccgggaccacgcccgaccgcgatcgcgtcgagctgcgacttggcgataccggcctcggccagcatctcctccgcccacggcaacgccagttccgcatgccggcgcggggccaggccgaaacgctcatgcacttcgccatcgatgtagacggcgacggaacaggcttcggtggcggtttcgaacgcgagcagtttcatgggccggattgtgacccgaagaacg
	Cell Cycles in Prokaryota	aatcgaaatcgacctcgtccgcaaacaggccgaactcaagtacctcgacgagaccagccgcaagg
		attgggtgcagactggcaaccagcacagcgggcgctataccaacctgccgggtggcacttatacactccggctaaaagcatccaataatgatggtttgtggagcaatactggtaaatctataaccatcacgatcattccacccttctggcagacctggtggttctatctgttggccgggctgacagttgtcgccggtgtgattggagcttcccggctgcgcgttcacaggatcgaatcgc
		tatccccacacataagccgatgatttccaaggatatatatatcgcctgttttggtcttaggctcatcaggcacttcaggaacagcatcttcatcagttaagccgtctgtcccctcaattacatttaatagggcatctaactcatctttatcaaagccaagcaactctaggtcgtattcctcgcccaatagctcttgaagctctaaagtaagcagttctgagtcccaatcgctatttaatgccagtttta
		caggtaggaatctgggattgggatatcctaaataaccatttagtctgggacgaccagatgtacattttatacggtgtaaaaaagatgaatttgccggtgcttatgaagcatggttcaatggacttcatcccgacgacagggagtttggtgccaaacaaaccgaaatggctttaacgggagaaaaggaa
		gtttggtcgttgtaagaattggcgccacgctacgttctttgacaatcgccttcgcaatctcgtaagcgtgcttttcatccccataatcgcggatcacgcgagttaactcccggagttcgtaagtgttcaccaccatcgctgcggtcagcggattatccgcatccatgcgcatatc
		ggtgccgccgtatttgcgcgacatggaactgtcggcctgggtgaagggggagaacaacaggttcagcttgtcctcggcgacgccgatgccgct
		tataaattattcatgatgtgtttccttaagttttaattgttcatctttaaacagatttttaattacatacacataatccaacttattaaagtcagtagaataattgattttaattttataaaaattatctccgggatttaatttataacttgaaatagtaccaatcattataccttcagggaaatcgagcgaaaatccactcgtaataac
		tgccggtggcgtcgtacatctcgtgcaggttgtcctgcttgctgcctaccgtcacaacagccttgatgccgtccttgatggtgatctgatctagcttgcccaccactatcgtgcggccgtcggctgcgaggatatgaatcgccatcttcacgttgtgttcgatgcgactacgcaagcggtcaatgatgtcgtcctgcttggctttggtcagcgcctcccacggctt
		tgcttttgtggcataccagttgtttagtcacgtgaaactgcgcgcgatggtttggctagacccatttccgtatgcgcttaacgaaagctatcaactagttcaaggtttgtatggctttgctagtggcggtctgtttggtcgcggactcggtcagggatattcctggttggttccgtacgcaaaaagcgatttcatattaagtgcttttggtgaagaacttggttac
		cgtgttttaacgcgcgatggaaattcaagctactacgtgaataaccaagtagtgcgtcgtaaagatattcaagatatttttttgggtcactggtatgggtccaagaggttacgcaattattggtcaaggcaccatcaaccgcattttggaagc
		tggcgactacttcgccgatgcgatcaaagattgcgtggttgggtttgaagcgatcaccaaatcgagcaaggcgggcagatgcgcgttcgagcgcaattggatcgcgatcgattccgataacggtgagcgttggaaacttttcaagaagcgcttcggtgtgaccgcctaagccaagtgtgcaatcaacaattacaggtgactcatttagtgaagtagttgaggagagtaattcaatacagcgatcaag
		cgtgaccgcgtgacggcgatgagcaactacgcccggtcccatgtgaataaccccttcgctacccgtttcgataaggcgggtcgggcgacggtggcgatgctcggggtggtgatcttcatcgtggccgcgccgtaccggctggcccgtgtagtcaagttcttcgatccgcagttcaagatcgtggagc
		tgcggccacgcggtggtgcattcccacggtcaaccggaatttccggccttttttgaaatccgcccggcttgctggcggaacgaagtggcgtgcgtttattggttttcatagttcagctccagtgtctgggcgatttgttcgagcggcggcagttcgctgacgctgcgcagtcccagatcatcgagaaattgcttggtggtggcaaaca
		ggtattttccaagccatttttgatggcctgaacgatttggcccagtggttcactcaaggcttccagaatttcattgctgctgattctgaagctgcgcggcacacccatggaaatattgcgtccacgcacctccatctcccgaacaacaccggatggaaatgcagctccgactgtttttttgatgttttctgcagtgtgctctccgatcaggacgccgtggtttcggcgaacgtaggcgatgatcg
		aagctttgctgaacacgagccagttatgattattatttgtgatgagtgtaaaactagattccaattggatgttagtttaattaaaaaaactttttttaaagtccgatgttcaaaatgtcaacacgttttttcggttgatacctcgcctaaggaagaggtttatgaattagccgcacatcatattgcgcctgataaaaaagtgattgcgatttgtaa
		cggtgtcggcggcgcagaacattgtcaaatgcgtgcgccgttgcggcctggaggtcaatgacctcgtgttgcaaccactggcctcgagctacgccgtgctgtcggaagacgagaaagacttgggtatttgtctgatcgatatcggcggcggcacgacc
		tgcgctgctgcttgtacttcgaaatgcccgcggcttcctcgaacatcgtgcggcgctcatccgcctttttcagacaagatgctgtcgatcatcttcgcctcgatgaggctgtacgaggccgcacccatgcccgtgtcgtagaacaggttgtggatgtccttgagacgaca
		gtgatttggtaaaactgcttcaggaactggctgacatgattatggtacagaccaaccgccgccagctcaatttcagattggaaatggctcctgatttgccacactacattaaaaccgatagcggcaagttgcggcaggtgctgattaatttattgggcaatgcggtcaagttcacccggcaaggcggggtaattctacgcgctcaggttcattcattgtct
		atttagctggagcagaaatcgagttggtcgatcttgatgagcgcgagctgcgcctcaaagctgcgctgtccttggtgggcgctgagtatgactttatcttgattgattgcccgcctgcgctctccttgttgacgctcaatggcctatgcgcagccaatggcgtgattgtgccgatgcagtgcgagtactttgccctagagggcttatcggatttggtaaacacca
		cgtttttatcagcccctccttttccatctcctttcccttttagcataccaccgtagtcaattccataaggtgggtcagttaaaagtaattcggcttttttaccatctaatagtttttctattaaatcactatccgttgaatcaccacacaacaatcggtgttcgcctatc
		agaaaagtatgccgctcatcaagctcctgatattcctcaatagcggtcagattgacctcaccgaactcgtcgacctgattctgcagttcgagctgccggagagccatctcattttcgtcgccaacagcatcaagagtgtgcgccgaaacatccgatatttccatccggaaccgctctcttaactgtgcctccagagtattcaactccagcagcgcggctgattgcttgtaaccgg
		cgcaaccagatcggtcccttcggcgcagccgtggcgggcgtgctgctgttcctgttcgggcgtcccgcctacctgctgccggcgatgttgctggtcgccgcctggctggtgttccgcaaccgcgccgactcgctgcagccggcgagccggctcaacgcggcgatccgcatt
		gaagccctggccgtccccttctcctcctggaccacgccgtgcagcgccgagcggatcagctccagcgtggcgggagcaagcggcacctgccgccggacccgcggcgtgaacgcttgcacaagcgcgccgtcggcagcctcgacccgctcgatgatctgcggcaagtagaccgtgcctccgttggctatcgtcgcgtagaggctggcgatctgcacgggcgttgtcttgacgtttccctgaccgatggccg
		ggatactggctctgcggggtcttcatgaaagcgaagagcgctttcgcacaatgttcgaacaatctgaggatgcgatcatcctctttactcccggaacctgcacagtgattgatatcaacggcaccacagaaagtttattgggttacaccaaaagtcaattgatc
		ggcggccggcatcgccgcgcagcgcgaccggcacgccgtcggcaaattcgcagtgcagggccaggccggcctcgaccgcacgcgcggtgaccaggcgcagcacgctctgcgccgcttcgcgcaggtcgaaacgcgcggcttcgaattcgacattgccggactccagccgcgcatggtcgaggatatcgttcaggatgtgctgc
		atttaaccgaagaactgtttggtggggtaaacatagcaatttcgtatacatctgttgcatcagcagatggcttagcaattccagtatctacttttgaggctgtccctgaggcaccatttgtcataatttgaaaattagtatctgctgagtcaaaccctacacccaagatattagttaaagtagatggattaacatctgttggtgcattactattactctgcattccaacaaagagacga
		aagcggagctgtaggcacaggtaagtctgcccactctagcaagcccaccacttctttttgctctaatttcagcatttggccgcgcttaaacacgtggcggcaaattcacagggccaaagcgcacacgcatcaagcgactcactggcaactgaaatgcttcaaacaagcgacgtacttcacggttacggccttcacgcaatatcacctgatacccaaat
		caatgcaatgtgaatattttgcgttggaaggattgtctgatttggttaacaccatcaaacaagtgcactcaaatttaaatccggatttagtcattattggtttgttgcgcgtcatgtttgacgcgcgcatgacattgcaacaacaagtctctgatcagctgctcgaacacttcggcgacaaagttttcaagtccattattccgcgcaacgtgcgcctagcagaa
		tccagctgaccaagtcgtgccgtgttttcggcgagcagactctgcagaatatttcgctcaccgcgacgatcagcctcagactttgctgtctcttctaatccacggtgtaattcagaaatgtcggcggcaagcaatcgcgacttggcatcacgaactactgcagcaattccttgagcctcacgagctacctcggcctgctgacttagtggcttcaactggcgacgcacttccccgg
		caggcgttccttggccagttccaggatggacaggaagctgaccaccacgcccatgcggccttcttcgggaatgaagaagctttcgaagctgtggaactggccatcgcgcaggcggtcgagcacaatcgacatgcgctcgcgcacgctcagcgcttcgcgctt
		ccggccggcatcgtactgaccggcggcaccgcgaagatggaaggcgcggttgaactggcagaagaaatctttcacatgccggtgcgcctcggcgtgccacaggagttcaaggggctggtagacgtgattcgcaacccgatctactccaccggcgtaggactgttgcattacggcatgaagcaacacggcaacggcggatccagccagtccgaacagagcaaggaatcaccgctgatcaaggtcaagcgttgg
		aacctcgacctttgggatctgcgtagccatgaccaggtgtatacccgccgctctgtgacgttgtgcaatattggctatcagttcctcggcgtcagccttaagcattttgtccagcatcaggtctgcaaactcatcaaacacaacaacaatatgcgtcatctggtcattgcgatgcgtagcgttataccggccaatatctctatgtccaatacgtgctttggggttgccagtacg
		catatttccggcaggctcctgcacgggaaggcccactcctatggcagcagccataggctcctcgatcaggaatacttcccttgctccagcacgcgtcgcagaatccttgaccgccctcttttccacctcggtaatatcgctgggcacagcaatgatgatacgcggcctgaccatcttcttcctgttgtgcaccttcttgatgaaataacggagcatcgcctctgttatgtcgaagtcgg
		acaactttgcctgggcggttggaatggcgccggcggacaatccaaaaattgccgtggtggtcatgattgtgcaaggcgcgactgggccgaatgcaggatccattgtacgggaagtaataggggaatacttgcaggtcaatactgattatacagtcatggacctggggtcgaaacaacagtaggagggaaatat
		ctcatccgcctcgaaaacctttcgcgcatctaccagatgggcgccgagaccattcacgcgctgcgcgacaccagcctgtcggtcgagcgcggcgaatacgtcgccatgatgggtccgtccgggtccggcaaatcgacgttgatgaacgtgatcggc
		ggcgctgagcagcccgaagccgtcgaggcggggcatcatcacgtctgataagatcaggtcgggtttgctgcgctgcgcggcctcaagcgcttgttcg
		tggtcatggctgcaattttgatcgagatgaaatccaagatgttgctgccagtggataatcaggccaatgaagaattgctagcagaagcagaagctgaaagactggctttattggaacgattagtcgaatacaaagccttcaaaactatggcccaagaactaactcaccgtgaagcggaaaatctttttgtacacacccgcgatgagataaatgcggaattgattaacaa
		cattcattgccagcttgttgtcggcaatcacaaacgcccgcttttgcgcatccgtccagccatcggcgatcatcaccggcacctctttcattcccagtttacgtgcggccatcaggcggccatgaccggcaatgatgccgccctgggggtcgatcagga
		tccaattccataaaatatttcaaaattagttgttccaagtaaggccatatgtaatattcgccaaataattaggccaagtaaaataaataggatcataacaccaataaaaccccactcttcagagaaagcggcaaaaatgaaatcggtctcatattccggtaaaaaatttagtcttgattgt
		gctctttgtggtcttgtacgccgctgacttcactgtgcgcaagatgaatgtgatgcacagtttgaaaaaagccttcctgccgatgctgagacacgc
		gttaccaaacctacggttaaaccagcgggaatggtttcttctaaacctgaggttaccactaaattattgacagcaatattttcatcttgaggaataaatagcatggacaataaggccccgccattaccttggcacaaaccaattgtccgcgaggtatttaaaatagaaacggccacctcggttttataacctaaaacagattgcaccacagacgactgggcttttacttcga
		caccatttgcgccagttatatcaacatcaagtaatggattatgaatagccttatctacagcttccatcgccctattctcagtatcagattcaccaataccaattagtgcaatgccgccatttcccatgaccgcttttacatctgcaaaatctaagttaactaaacccgcacgtgtaatcaattcagctattcctttaaccgcattagtcaaaatttcgtcagcgaccttaaatgctgtatgtaatggtaag
		acggcgtgattgcggatttcgacattacggaagccatgctcaaacattttattctctgtgttcataaccgcaaatccctggtgcgcccgcgcattatcgtctccgtgccgtcggggattacgcaggtggaacgccgcgccgttcgcgagaccgttgaatcggcgggcgcccgcga
		cgcatccgtcgtaacgattattgctgtctctggtgcctcttcgcgttgggttgtcgctctattgctcatcgcaatcattggagcctttggtgccactaaagctggtgtgattaattcataccaagttaatcgcttgcaatcatttgttaatccaaatgccgatacgcagggaagtggttatcaacttcgccaagcccgaatcaccgtaggttctggtggattatttggcactggcttatttgatgg
		cgcattacttccttgttaaaaggtgaagtaatggagaagctcaatagtatctgtgaacttgatgcaccaaaatctttggttgcgcaagagcaagagcgtttagttgagtctgcacgtcaagatttgatgcagcgcggtattcctaatgcaaaagacgcaccgattcctgccgagatgtttgct
		cctccaccggatcgagccgcgaggccttgctcgccggatagagcccgaacagcacccccgtcaagattgccgccacgaccgccgcaatgacccgacaccagcggggaccgtggccgggatcggcgagaacgaacggatcccccaggccaccagc
		ggtcgacaagagcggccacgggcccatcgacctgcagcgcgccatctaccagtcctgcaacacctatttctaccagctggccgtggacctgggcatcgaccgcattcacgactacctgctcacattcggattcggtcagaaccttgcgatcgacattccggaggcaagtgtcggcatcgtgccctccgaggcgtggaagcgtgagaatcgcaacgagccgtggtatgccggcgagacgccctacgaggg
		tatgggaatatgaattcattttaaacggagcgaaccatgaacaagatagcaatcaagtaccgcaaggttgaagacctcatcccatacgcacgcaatagccgcctgcacaacgatgcacaggtagttcagattgcggcatcaatcaaagagtttggatggcgcacagc
		cgccctacacacggaaaatgcttgccttgcttcgctatcgccgcattccttaccgtgttttgtggggcagccatattgccccaccggcaggttacccggcgcccaaggtcaatttgctgcgaacgatttatttgcaaaccgatggcggacgtgaagccatggtcgactccacgcccatcatcgaccggttggagttgcttcaacccaaac
		tttgcttatttagcgcgacaaatcagcccgaatttagccgaacaagtgaaaagtttgaaactgtcaggcatttattcagagcgcgaatttaaacgttttatccaacaggcggcgtgacggcgcatttaattggtttcaccgatttagacgacaaaggacaagaaggtttagaagctgcttacgatcatttattgcgc
		ccggcccaacgccgacgaggtggtccggctggatgatgtcaaacggcactatttggtgggcgacgagacggtccgcgccctcgacggcgtctcgttctccatccgcaaaggctcgtattgggcgatcatggggccgagcggctcgggcaagagcaccatgctcaacatcctgggctgcctcgaccgtccctccgaaggcgcctactggctcaacggcgtgaacgtcgccgagatggacgacaacgagct
		atagcgattggccataaagcgggctgtttctgcctcagtgagcattgatctgagtggaaatgtccccatttttcgcgaatcctctagggagcgcttgaaattacggcgatctctcggtgaaatcaggacaattttggacagttcatcgatgagctcatccacattgccctttacctcctccgcattaacgtccagagtgagtgcagagtagtttctaccaatcacaatgccatttctat
		accccatttaactttatagttagacttgggtcaagtgttatcattcttttaactattacgtcacaatactttgggtcgagttccatcaaataagacttcagtttcttttgatgtgcagtaaccatagtaacaccactccctccaaaaaagtcagcaattgtttttatatcttttttggatttatcaatacaccattcaactaatgaaactggtttttgcgttgggtggactctatttgttttttcac
		acacgacgcccaaatatcgaaccacttcggcgagaaaactatcccgacggatcggtttggtgatgaccccgttcatccccgccaccagacaactctgtcgtgtctcctcatcggcattggcggtcaagccaatgatcggaaccgaagccgcccatccgcgaagcgacctgatacgccacgccgcctcaaggccgctcatccccggcatctgaacatccat
		aaatcgctattgtaatcaactacgttgacttcaatttctttccatccgagcaatttacaagcggttattctgtgtaatcctgcaataagtttaaagtcagaagttacagtaatcggttgcaataatccgatttcattaatagaagcgcacaactgggctacatcgccagcatttc
		gcaacccacgttatgcaaccggtgtgggcttggtattgatgggcaagcaacagctggagcggcatctgaatgggcagctggaatcaagttcatttggccgtattctggacaaaatgaaaagctggtttcagggtaatttttagtagtagatagcagtaaa
		ccgtacaggatcggctcgtactggcgctggtagtcggcgcggccgagcgtgaaggtgttcttggcccagatgatg
		actccagaattaagagctgccgcaagtattgagcgcgatgtgatgctattgggaatgggcagtcactttgaattatgggatgccgcaacgtatgcacaaaaagagcaagttgcaatcgcacaaggcatgccagatgctctcaaacaattcaccttctgatgttggccgaccatgacatttacccatcgcccagtattactggccgaggcagtcacctcggtattgggagaaacg
		agcagatgtcatttgaaatgatgggactttccgaagatgattataaggctcgctaccgcgacagcgccgaattccaggtgaaggagatgttgatccttcatgcgattgccaagaaagaggggctgtcactggcacaggaagatgttgagaagaagtacgcggaaatttccgcccagatcggccgggacgttgcggagatcaagggctactatgagaaaaatcgtgatgccgccgagcatctcggg
		atcatcgaattcgacggaaagttgccggttggggccgaaaaggcgctgctcaagggaatcgagctcgaagatggaatcggtcgagttttatcctttaaacagctcagccctcaatggattgaggtgacaatccacgaaggtcgctatcacatcatccgccgccagaagcggcccggtgatatgctggtgcctgacgacacttcgctc
		gcctgaatcctccctgcatcgcgccgcttgtttcgacaaggtctccggttaatgtaaccattcttacagttcctacacctatttgcctcgcggtttctatgtcccttacaacaagcgtgtttccaaatacaaactggaatgctttctcatacattttatcataagaaa
		ccggccttctccatgtcttccaccagccgcgcggcgcggttgtagccgatcttcaggtggcg
		ctgataaagcggctattcctgaggtctggctagtagttggcgtcaatggtgccggcaaaaccaccacaattggcaaactttgtcgcctctttcaggcgcagaataaatctgttctcttagctgctggagatacctttagagctgctgcacgcaatcaactccaagaatggggtgggcgcaatcaagtagacgtcattacccaagaaggtggggatgctgcagcagtagcccacgatgcca
		aatgcaagtgttattttgcagagcgccggatggctctctacgcacccgctttttactgattttagcgcaaatttaccgctttttttggaaaaaagagcctattcttccagcagatccatcgctttcagttcgtgatacagccgggcgaccggaagtcccatgacggtgtaaaaatcaccgttgatacctttgatgtacttgctgccgacaccttgcaccgcataggctccggctttgtc
		cccaaactcctcacgtaaaaatgtataattaacggttcctgtttttgttattacttttgtgctggaattgtcaatctgggaaaacggcttgaacagcaaagccagcttgtccgagggaatgcccaggccggtgtcttgcacggcaaattcaagggtggccatgtctccgtcacgcgcaatttcttcagctatgacgcgcacctcgccattcggcgtgaacttgatggcgttgttgatcaggttggacagcattt
		ctggatattgatgattttgtattcaccgggctttatatcacccaatgcataattaccaaagtttgttctatgtagttttttgacggtgtagccaagcgaattaaaggtccgacgtatctgtcggttgcgaccttcgtgcattgttactatccagtcgtgcctgtcggtgtcattcattttttcaagactcaatttactgacgccgtcttcgagattgaccccataatcagatatcatctgttggtgaagtggtt
		agaccatcgattaaagcgccaccaccggtcataataataccccggtccataatatcggcagctaattcgggaggagttcgctctaatacggttttgact
		gagcgaatttctcgcgaatatgagtcacgagatccgcacccccatgaacggtgtgattggtat
		gttttcttgcaatattcatcgccaagccattgaaagcgcaccgaacatgaataccacttcaacgcctgaaaccggaaaaaacccagcacgcagactgattctcggttccagctctgcctaccgacgcgccctactcgagcggctaggcattcccttcagcgttatcagccccgatatcgacgaaacgccgct
		ccttgatcgcgcgcgccgtcgccggcgaagccaacgtgccgttcttcacgatttcgggctccgacttcgtcgaaatgttcgtcggcgtcggcgccagccgcgtgcgcgacatgttcgagcaggccaagaagaacgcgccgtgtatcatcttcatcgacgaaatcgacgcggtcggccgccatcgcggtgccggcctcggcggcggcaacgacgagcgtgagcag
		aagcgactcgttctacagaaaaagccgatgccacacatgcagcgcaaaaaggcgatgtcgctgtgattgatttcgacggctcggttgatggcgaaaaacgcgcaggcatgaagggtgaggatcattcgctcgagcttggcagcggccagtttattcccggctttgaagagcaactgattggcgccaaagaaggcgaccaaaaatctgtcaccgtcacatttcccgccaattaccatgcgt
		gtgtagagttccttgtcggggtcggactgcttgccggcgccgttggaatggccgcgcgggggcatgacgccgatgatgcggtaatagccggcgtcgatgcggacggtctggccgagaggctcgtcgaaggcgaagagggtcttggcgacggtgctgccgaggacgcagtaattggccgagaggcgttcgtcggtgtcggacaggta
		gcttctgcggtttatgctgaaattggtctaacccgaatcattccaaatccaaaacagccacgagttgcttttgatgaagaggcgatggcggaactagttcactctctaaaagaaatcggcctccttcaaccaattgttgtgcgatcaattgcaccaacacctgaaggtgca
		aagtccagttagaagatctcttccttgcacactcatttttgtttctttcctctggggtactgcactacctatggagatttttacatcctctgcacttcgctcccctattaatacgttgtatttctctcttacatagttaataacatcctggtccatctcatctcctgcaattctcattgtattgtctacaacaata
		tcaatgagcagttccgtcagtatttcaaggtcctgttcaacggcggtgaggctcagctggtccttttggacccggaaaatgcgctggagtccggcattgagatcattgcacgtcctccgggcaaaaaattgcagacgatcagccttttgtcgggtggtgaaaagaccatgaccgccattgcgcttatctttgcggtgttcagggtcaatccgagcccgttctgtgtgcttgatgaaattgatgcggcgct
		cccacccggcggcaccgaggccggtcgcacgacgccggaacggctgaagaccgcctggaagcgcacgccctcgcagcaggcttggctgacgcggcagatcaacgacccgttcgccgccaaggcgcgcgcccacggctatcgcagccgcgcggcgttcaagctgaccgagatcgacgacaagctgcgcctgctgaagccgcgcgcgagggtggtcgacttgggcgcggcgcccgggggatggacgcaagtgg
		acgaggaaatgctcgcgctcgagctggccgacttgaaagaggccggtttcgacttggagctgaccggctttggcgacgacgagatcaaagacctgctggccgaggccgaaaagaccgacggcctgaccgaccccgacgatgcccccccggtaccggccaacccggtcaccgtccagggcgacgtgtgggtgatgggcaaccacgcctgc
		ctaaacgctattgagatcgctcttagtttacaaagactcattgatgaatttagcatgactcatgaaaatgctgcgttagcaatcggtagatcccgtacggcagtgagtaatttattacgtcttttagagctgccggtagagatcaaaaatatgttacagcagagacttcttgatatgggacatgctcgagccttattggttttgagttcagccaagcagatagccgctgctaagattg
		tcctcgtcgtcgaaggcgtcgcgttcggcggcatgcagcaccagcacgcccagcgttttgccgtcgcccggcagcggcagcgcgatcgagcactggtaacccagctggcgcgcgcggaaacgtatgtgttccagctgcgggtcgttgtggatgtcgcgcacgatgtgcatttttccggtggtgatggtcatcgccgccgtgcccccggtactggccgccggatgtccatggat
		gcggcgatgccgggctgctggtaaatatccaccacctcgaggtcatagcgcccggcgaggtgttcgtcgcagagcgcgcggatgttggccaccgcctgcgtcgaacgcagcgtcgtaccggtcacgtagagcttcaggacgtaccgtttcgtcgtccgggcgcttttcagcagccgc
		gggggatgagccggctttgaagcgccgcccttgccgatgccgcaccaacgcatgagggcattgatctcttcgtccgtcagttcttccttcataccccgcttgagtcgcggaggcatggcgatgggaccgaagcgcacgcggatcaggcggctgaccatgaggcccaggtgctccatgaggcggcgaacttcccggttgcggccttccttgatgaccaggcgataccactgattgatgccttcgccg
		gctttccgttttcctttgcccattttgtatatcttctgcggataacatcacaataaatcgggtctaattccataatgcgacattttctatttgttttttcacaagcaatcaatgtcgttccactaccgccaaaaggctctataacataatca
		cgtagccggctgccgcttgaactctctttatttatcttatttccgcgatgcgcattccaacgcggactgcaactcttttacctgtatcggcttgctgacgtaatcattcatccccgctgcaaggcattcctcgcgatcgccctgcattgcgttggcggtcatggcgatgatatggatatttgaaccctgttcgcggattcttcgtgtggcttccaaaccgtccatctcaggcatttg
		acttgccgaagcaagatgtactgcaaaaccatttgcatagcgcaaatcaattgcatctacgcgattag
		tccaattccataaaatatttcaaaattagttgttccaagtaaggccatatgtaatattcgccaaataattaggccaagtaaaataaataggatcataacaccaataaaaccccactcttcagagaaagcggcaaaaatgaaatcggtctcatattccggtaaaaatttagtcttgattgt
		cccagcagggccgccagtgacatgccggctctgagaaggtcaaggcgccccgccgctcctgcattgcgaaactccggaagcacgcgcggccccaggatcagcagcaggcccattaccggcacggagaggaggaacaccgagctccaggagaagtactggatcagcacgcctccgaggatggggccgatcgcgctgccggcggagaaaccggagatccagaccccgatggcacggg
		cctcgcgcggatcgaatccggcagaatcgacctgcacgtgtcgaatgtttccgcgcaggcgattctcgaggatgtcgcggggctggtcgcgccgcaaatgcagtcgaaatcgctgagctgtacgatcactcgttgcaatcccgccctcggcgttcacacggacgcggagaaagcccgacagattctgctcaacctgttgacgaatgcg
		cgcgagggcgggcaggcgacgcggttcattttgagcagaaacacagagatttacggaggcacttgttagcaaatcaatcaacaccaggcagtgcgttcagagacatcgaaatcagcctgatttcaccgtctccgtatcagcacagacgcactttttcaaagctgaaagagctgggtgaatctatcgccagggatgggctggttcagccgatcacagtgaggaagattggtga
		caatgaccggaacagaatccattttgagcatttcagccgccataacacgaccgtgacccgcaataatttcgcccttttcgtcaatcagcaccggattagtccagccgaattgcttaatactttctaccagttgtgccacctgctcagtactgtgcgtcctggcgttgtgcgcatacggtgacaattcttgtaatgggcgatagactatctttaatttctcgctcatacagccttgctttatgaataaaacg
		tccttcaaatgagaatggcttagtaactacaccaatagtgagtgcgccgagatcgcgtgcaatcttcgcaacgataggtgcaccacctgtacctgttccgccaccttctcctgctgtaacaaaaaccatatccgcgccacgaagaatttcttcaatctcttctgtgtgatcaattgcagcttgtcgacctttctcaggtgcagctcctgcacc
		ttcacgcattttcgcaacgccaccttcggtaacacctagtgacaatgcgaatgcatcatcaattgcaggaagatgtgcccagttcactgacttaacagtgatggtgaaatcagcagtcttaccagctacatctttgccatggtaatcagccgggaagcttagagggaaagtcttgctctcgcctgctttgaggcccaatgtagcagcttcaaattctgggagcatgcggccttcg
		cccagcgcggcaccgccatgggcaccagcgcgcacggcctgggcactgccaccatctaccaggaatcaaccgaggcgggggcttactcgggcctggccatgggcctgtcgggcctcatcacagcgctgacgctgccggcgctggtggcgatgtttggaatctgaagcccaacggcacacgcccgattcgaaatgctagacgccgggtggaaagccaccactgagg
		acttgcactgaaccagcaagtgcttcgcgcatttccacagaagaaatttcgatactttcgggcaggccggtcaccaggtttcggccgcgcacttccatcgttttttcaggttgaagcggatacgcagaaccgatcttccacttgatctgctcggctatgctctcaccgatcaacaggtta
		attatgcggacaaccaggaaatcgcattcatcaactacaagggtggagtcggcaagacctcgctcatcgtgaatcttgccgcatgtcttgcactgaccggaaagagggtcctgctctgcgacttcgatacgcagtcgaatgccagtatatggcttctcaagctcgatcgctggaatcggatcaattctgcggggaagtgccatcttctccatttttcgaaccgggccgggcccgggtgaagg
		ctataaaactggtaactcgttgccagcggtacggcgaaaaataaatcagcattccagccaatacgccaacaatcgaagcaatgcgccaaattgcaaaagcctcgcgcctgctaaaacataacgcccatgactatcattaaaatcacgaccgacgag
		gagcgatcatggccgcctgggcggtgcgcttcacctggtaccgctgggttcgcatcatcgcctggcgcgacatggacgagcaccggcaggacctcgcgtaccagccgtttcaggccgtgatgagcttcggttcgggagaggtgacggggctcggtctc
		gtcctgacagtaatcggctgaaccaatccatcgcgtgcaatcgaatcacccaactctttcagcttggtaaaggtccggcgatgctgaaagggtgaaggtgcaacgaggtggatattgatttccttgaagatgctttcttgcattgaattatgattttttgttgtcacgcccaatttcccgtccttatccggtgggggctgttatgcggaccggattcgatgcccacctg
		aataggagcaggatgcctttgatgtagtcgaggctcaggccggtcttctgtgcgatgacgcgcttgtcgtagccctgctgactcaactgctcgatgctcatcagcaattccagcgcgctgtatttccggcgggcgatgttctcggttaggctcatgatgaaggcgtcttcgtcgttgaccgtaacgaccagtgccggaatctccttctcaccgagcgacttaaacgccttgagcc
		gtcagccaaggcgctgaatgcgtcgaactggtcggcgggtgcatggcttcacggcaccacgttttcggccaggctggcttcggtcacatccacatcgtcggaaagcacgttgcattgcacggcatggtctttcggcagatggccggattttgcagttcc
		gatgtaacttttggtggaggtggacattcagcagaaatattaaaatatctgaaaaaaggggaggctaattgcttttgatctggatgaagatgcaaatagaaataagataaatgatccaagatttatgctcattcattctaattaccgatacattaaaaattatttaaaatattatgggataaatgaggtagatggaattattgcagattttggtttatcttttcatcaggttgacg
		ggtatttcccgaaagggcttccattacatcatcaatattctcaattgccgcctgacggcctatctcaggtttactgccggcaccacggccctcggtaagtgcttctcctatctgaaccttaatgggtacctggctttttgccaacgcctggtggtcagta
		attgtcgtagacaatgataagactgcctcagagtgcatcaagtatctgaagaggaacaggttcggatctgcctctttcctgccattgaacaagatgaggcctgtgcctgagcagcctgacctgaatgaagtgaagaagcttccaggtgtaaggggccttgcgatagagctcattaaattcgatttctctttcaagaacgtgttttcatatgtattcggcaatactgtcgttgtcgaaaa

[truncated: 13 more sheets: Stress Response, Macromolecular Synthesis, DNA Metabolism, Nucleosides & Nucleotides, Photosynthesis, Fatty Acids & Lipids, Motility & Chemotaxis, Sulfur Metabolism, Nitrogen Metabolism, Phosphorous Metabolism, Potassium Metabolism, Regulation & Cell Signalling, Protein Metabolism]
